# Supplementary material for: Plasma proteomic profiling of pan-cancer patients discovers biomarkers of cancers
Source: Research Square preprint supplement (doi:10.21203/rs.3.rs-939549/v1), 2021-10-05
Supplement: Supplementary file 1 [file 37a21a88f93a5e5d17af3829.xlsx]

## Sheet: Description
Sheet	Description
hug genes	the total hug genes in the modules
the overlapped proteins	the overlapped proteins in the tissue and plasma
core marker	the potential biomarkers in tumor
hug gene
Columns	Description
gene symbol	HUGO gene symbol
tumor type	tumor types
the overlapped proteins
Columns	Description
Symbol	HUGO gene symbol (the overlapped proteins in the tissue and plasma)
type	tumor type
core marker
Column	Description
Type	Tumor type
Gene Symbol	Gene Symbol
plasma_mean_N	Mean value of protein abudance in normal plasma
plasma_mean_T	Mean value of protein abudance in tumor plasma
plasma_ratio	Ratio of protein abundance between tumor and normal plasma
plasma_t-test	P value by T-test in plasma
tissue_N_percentage	The percentage of protein identification in tumor adjacent tissue
tissue_T_percentage	The percentage of protein identification in tumor tissue
tissue_mean_N	Mean value of protein abudance in tumor adjacent tissue
tissue_mean_T	Mean value of protein abudance in tumor tissue
tissue_ratio	Ratio of protein abundance between tumor and tumor adjacent tissue
tissue_t-test	P value by T-test in tissue

## Sheet: hug genes
gene symbol	tumor type
ABCC4	THCA
ACSM2B	THCA
ACYP1	THCA
ARHGAP9	THCA
ARHGEF6	THCA
ARSD	THCA
BRD4	THCA
CDK2AP1	THCA
CEBPZ	THCA
CHAMP1	THCA
CHCHD2	THCA
CHCHD2P9	THCA
COBLL1	THCA
COQ10B	THCA
CORO2B	THCA
CRYBG1	THCA
CST1	THCA
CST4	THCA
CYLD	THCA
DAB2	THCA
DDX20	THCA
DNAJC19	THCA
DPP8	THCA
EIF3F	THCA
ERLIN1	THCA
EXOC5	THCA
FAM114A1	THCA
FASTKD2	THCA
FBXL2	THCA
FNTB	THCA
HCCS	THCA
HECTD4	THCA
HELLS	THCA
IGLV2-14	THCA
KHNYN	THCA
LCMT1	THCA
LGI4	THCA
LLGL1	THCA
LLGL2	THCA
LPXN	THCA
M6PR	THCA
MAN1A2	THCA
MBLAC2	THCA
METTL3	THCA
MOB1A	THCA
MOB1B	THCA
MOCS3	THCA
MON2	THCA
MRPL2	THCA
MRPL55	THCA
NDUFS7	THCA
NECAP1	THCA
NMT2	THCA
NRBP1	THCA
PAIP1	THCA
PARN	THCA
PBDC1	THCA
PCDHGC3	THCA
PFKFB1	THCA
PFKFB3	THCA
PFKFB4	THCA
PLD4	THCA
PPP1R14B	THCA
PRPS2	THCA
PTBP2	THCA
PTK7	THCA
PTPRT	THCA
RBM22	THCA
RBMXL2	THCA
RBSN	THCA
RNF123	THCA
RNPS1	THCA
RPTOR	THCA
SCYL3	THCA
SEPTIN6	THCA
SETD3	THCA
SMARCD2	THCA
SOWAHC	THCA
STAT2	THCA
TBC1D4	THCA
THSD4	THCA
TMEM222	THCA
TRAPPC13	THCA
TRHDE	THCA
TUBGCP3	THCA
TXNL1	THCA
UCHL5	THCA
WBP11	THCA
ZC3H15	THCA
ZNF638	THCA
ZRANB2	THCA
TGCT	THCA
ACP2	THCA
ACSM5	THCA
AGPAT3	THCA
ANKS1A	THCA
ARHGEF10	THCA
ARHGEF17	THCA
ATP6V1G1	THCA
ATPAF2	THCA
BPTF	THCA
C1orf52	THCA
C4orf33	THCA
C7orf50	THCA
CA9	THCA
CLDN3	THCA
CMA1	THCA
CNTNAP1	THCA
COPS7A	THCA
DAP3	THCA
DEGS1	THCA
DNAJB4	THCA
DPM1	THCA
EDC3	THCA
EIF1	THCA
EIF1B	THCA
EIF2S2	THCA
ELFN1	THCA
FIP1L1	THCA
FKBP15	THCA
FLT1	THCA
FMNL1	THCA
GEMIN5	THCA
GLRX	THCA
GMEB2	THCA
GNG12	THCA
IGHV3-64	THCA
IGKV1-16	THCA
IGKV1D-16	THCA
IGLV2-18	THCA
ITGA2	THCA
IYD	THCA
LRCH4	THCA
MAP2K7	THCA
MARK3	THCA
MORF4L1	THCA
MRPL39	THCA
MTIF2	THCA
MUC4	THCA
MXRA8	THCA
NAA11	THCA
NDRG2	THCA
NDUFA2	THCA
NDUFB11	THCA
NDUFB9	THCA
NFKB1	THCA
NQO1	THCA
NT5C3A	THCA
NUP88	THCA
OTULINL	THCA
PDE8A	THCA
PEF1	THCA
PFDN2	THCA
PHF6	THCA
PIK3C3	THCA
PIK3R1	THCA
PIPOX	THCA
PPP1R14A	THCA
PRXL2A	THCA
PTPRA	THCA
RAB29	THCA
RBFOX1	THCA
RBFOX2	THCA
RMDN3	THCA
RNF2	THCA
RPS26P11	THCA
S100A10	THCA
SEC14L3	THCA
SEPTIN8	THCA
SETSIP	THCA
SLC5A2	THCA
SMARCAD1	THCA
SNX18	THCA
SPCS2	THCA
SRR	THCA
TDRD7	THCA
TMLHE	THCA
ZC3H4	THCA
ZC3HAV1L	THCA
ZNF512	THCA
ACSF3	OVCA
ADGRL2	OVCA
AHCTF1	OVCA
AIFM2	OVCA
ARHGAP26	OVCA
BAG6	OVCA
CASP6	OVCA
CCAR1	OVCA
CDH11	OVCA
CDK1	OVCA
CMPK2	OVCA
COL6A5	OVCA
CSRP2	OVCA
CTSA	OVCA
CUL1	OVCA
EED	OVCA
FOLH1	OVCA
FOLH1B	OVCA
GGA2	OVCA
GIMAP7	OVCA
GOT2	OVCA
GP2	OVCA
GTF3C3	OVCA
HIGD1A	OVCA
LIG4	OVCA
LSR	OVCA
LTBP2	OVCA
MAP2K4	OVCA
MAPK11	OVCA
MAPK12	OVCA
MGST3	OVCA
MICOS13	OVCA
MRPL9	OVCA
MSH6	OVCA
MUC16	OVCA
MYO5B	OVCA
NACA	OVCA
NEDD1	OVCA
NUDT6	OVCA
OSGEP	OVCA
P2RX4	OVCA
PAK1	OVCA
PDZD11	OVCA
PHKG2	OVCA
PLCB3	OVCA
PTX3	OVCA
RAB18	OVCA
RAI14	OVCA
RPL21	OVCA
RPS27L	OVCA
S100A13	OVCA
SCFD2	OVCA
SCGN	OVCA
SET	OVCA
SNRPE	OVCA
SPART	OVCA
SRCIN1	OVCA
TCIRG1	OVCA
TMTC3	OVCA
TRIM29	OVCA
TRMT10C	OVCA
WASL	OVCA
WDR44	OVCA
ARHGAP5	ML
BCKDHB	ML
CCDC22	ML
CHD5	ML
DIAPH2	ML
INTS7	ML
KRAS	ML
KRT82	ML
NDUFV2	ML
NFASC	ML
OS9	ML
PRAG1	ML
RCN3	ML
SPECC1L	ML
VPS52	ML
ATP5ME	RCC
ATP5MG	RCC
CARD8	RCC
CDKN2C	RCC
CELF2	RCC
CYBB	RCC
DENND2D	RCC
DMD	RCC
DPYS	RCC
ENPP3	RCC
GSK3A	RCC
GTF3C5	RCC
GUCY1A2	RCC
HIRIP3	RCC
HSDL1	RCC
INTS9	RCC
LALBA	RCC
MIDEAS	RCC
MLLT11	RCC
MRPL38	RCC
MTHFS	RCC
MTPAP	RCC
MYL2	RCC
NAA10	RCC
NAPSA	RCC
PDP1	RCC
PEX1	RCC
PIR	RCC
POLD2	RCC
SEC61A2	RCC
SELENOW	RCC
STX16	RCC
SYBU	RCC
TATDN1	RCC
TMEM201	RCC
TOR1B	RCC
UBFD1	RCC
VCPIP1	RCC
ABCB7	CECA
ABLIM1	CECA
AKT1	CECA
ALDH3B1	CECA
ATG9A	CECA
BNIP2	CECA
BRD3	CECA
CARHSP1	CECA
CCDC6	CECA
COMMD2	CECA
CRTAP	CECA
CTHRC1	CECA
DCLK2	CECA
DDX24	CECA
DENND10	CECA
DENND10P1	CECA
DHRS11	CECA
DICER1	CECA
DLG4	CECA
DNAJA2	CECA
DNPEP	CECA
DOCK9	CECA
ELAVL4	CECA
FGFR2	CECA
FHIT	CECA
FMNL3	CECA
GGACT	CECA
GLE1	CECA
HEPACAM	CECA
HGD	CECA
HMOX2	CECA
LAMTOR1	CECA
LRSAM1	CECA
MAP7	CECA
MBOAT7	CECA
NBEA	CECA
NEDD8	CECA
PAK2	CECA
PNO1	CECA
PPP6C	CECA
PXN	CECA
RAB23	CECA
RAB3D	CECA
SEC24D	CECA
SERPINA2	CECA
SNRPC	CECA
SRSF12	CECA
TMEM97	CECA
TSC2	CECA
UBQLN4	CECA
ADAP1	BLCA
AGFG1	BLCA
ATG3	BLCA
ATL1	BLCA
ATP6V1D	BLCA
C11orf54	BLCA
CEP350	BLCA
CFAP20	BLCA
CPSF4	BLCA
CUZD1	BLCA
DAXX	BLCA
DCAF1	BLCA
DENR	BLCA
EEF1AKNMT	BLCA
EPHA1	BLCA
ERBB4	BLCA
FBXO22	BLCA
FES	BLCA
FGFR1OP	BLCA
FMNL2	BLCA
GBA2	BLCA
GGCX	BLCA
HIP1R	BLCA
HMGN4	BLCA
KDELR1	BLCA
MAP3K10	BLCA
MAP3K11	BLCA
MAP3K21	BLCA
MAP3K9	BLCA
NECAP2	BLCA
NUDCD2	BLCA
NXN	BLCA
ORMDL1	BLCA
PDCL3	BLCA
PGP	BLCA
PHF10	BLCA
PPP6R2	BLCA
RAB6C	BLCA
RBM4	BLCA
RTN4R	BLCA
SH3GL1	BLCA
SHC1	BLCA
SLC1A2	BLCA
STRBP	BLCA
STRIP1	BLCA
TJP3	BLCA
TMOD3	BLCA
TOX2	BLCA
TOX3	BLCA
TOX4	BLCA
TREH	BLCA
ABR	HNCA
ACSL3	HNCA
ASRGL1	HNCA
BICDL2	HNCA
BLOC1S3	HNCA
CASKIN2	HNCA
CD46	HNCA
COG8	HNCA
ELOVL1	HNCA
ETV6	HNCA
FAM120C	HNCA
FN3KRP	HNCA
HLA-F	HNCA
IQSEC1	HNCA
KMT2A	HNCA
LIPA	HNCA
LRATD2	HNCA
MARK2	HNCA
MRPS36	HNCA
PAXX	HNCA
PIK3CB	HNCA
PTPRCAP	HNCA
RBM6	HNCA
RMI2	HNCA
RPS13	HNCA
SELENOM	HNCA
SLC29A1	HNCA
SMYD3	HNCA
SUGP2	HNCA
SYNJ1	HNCA
TBC1D15	HNCA
TCL1A	HNCA
TDP2	HNCA
TLR3	HNCA
TMED4	HNCA
TOR1A	HNCA
TRAF2	HNCA
TRIM72	HNCA
TXNDC12	HNCA
UCK2	HNCA
VAMP7	HNCA

## Sheet: overlapped proteins
symbol	type
CDH11	CRC
TBCB	CRC
CNN2	CRC
EIF2S3	CRC
FBLN2	CRC
FUS	CRC
LIG1	CRC
LTBP2	CRC
MCM6	CRC
NCF4	CRC
PNN	CRC
RPS5	CRC
SH3BGRL	CRC
SMARCE1	CRC
TOP2A	CRC
TPT1	CRC
UCHL3	CRC
CILP	CRC
ARHGEF7	CRC
NAE1	CRC
PLOD3	CRC
TCAF1	CRC
SMC4	CRC
SCAMP3	CRC
TBL3	CRC
NUDC	CRC
POP1	CRC
C11orf58	CRC
CBX3	CRC
DIS3	CRC
MAPRE1	CRC
PDCD11	CRC
MDN1	CRC
CEMIP2	CRC
MTHFD1L	CRC
RAB11FIP5	CRC
UHRF1	CRC
LMCD1	CRC
GNB1L	CRC
LUC7L	CRC
CTNNBL1	CRC
RCN3	CRC
FKBP10	CRC
XPO4	CRC
ANAPC1	CRC
TBL1XR1	CRC
PUS1	CRC
RBM17	CRC
HELZ2	CRC
PNPT1	CRC
NEXN	CRC
UNC13D	CRC
BSG	bladder
TBCB	bladder
DAXX	bladder
EIF2S3	bladder
EPHA1	bladder
FEN1	bladder
FUS	bladder
GBA	bladder
GGCX	bladder
GNS	bladder
GSK3B	bladder
GUCY1B1	bladder
HDAC2	bladder
AGFG1	bladder
KLC1	bladder
KPNA1	bladder
LIG3	bladder
MKI67	bladder
PDK1	bladder
GATB	bladder
PHKG2	bladder
RFC1	bladder
RFC5	bladder
SAFB	bladder
SEL1L	bladder
SH3GL1	bladder
SHC1	bladder
STAU1	bladder
STK3	bladder
TCEA1	bladder
TFDP1	bladder
TOP2A	bladder
TPT1	bladder
PRRC2A	bladder
SF3A2	bladder
USP9Y	bladder
PPFIA4	bladder
PPFIA2	bladder
NIPSNAP1	bladder
SRSF9	bladder
PLOD3	bladder
TRIP13	bladder
SAFB2	bladder
TCAF1	bladder
DHX38	bladder
TOX4	bladder
SMC4	bladder
SCAMP3	bladder
RBM12	bladder
CNPY2	bladder
CELF1	bladder
NUDC	bladder
CBX1	bladder
OGFR	bladder
CEP43	bladder
CBX3	bladder
DIS3	bladder
MAPRE1	bladder
RAB3GAP1	bladder
SARM1	bladder
POGZ	bladder
RRP12	bladder
RPRD2	bladder
KPNA6	bladder
GEMIN5	bladder
PTCD1	bladder
RANBP6	bladder
DNAJC2	bladder
LGALSL	bladder
MRTO4	bladder
HSD17B11	bladder
DDX41	bladder
EEF1AKNMT	bladder
WDR44	bladder
ADPRS	bladder
PHF10	bladder
LRRC59	bladder
RCC2	bladder
MYDGF	bladder
SRPRB	bladder
RIC8A	bladder
UBE2O	bladder
KLC2	bladder
CDC73	bladder
GSDMD	bladder
FBXL18	bladder
ADPGK	bladder
MAK16	bladder
ALG2	bladder
STRIP1	bladder
NEDD1	bladder
NAXE	bladder
TMEM65	bladder
FAM91A1	bladder
CPNE2	bladder
FOXK1	bladder
NUP43	bladder
DDTL	bladder
CAMK2A	breast
GALT	breast
HMGN1	breast
MGAT1	breast
MYL1	breast
RPL10A	breast
PNN	breast
RPS9	breast
SNRPA1	breast
STAU1	breast
TCEA1	breast
TPMT	breast
UCHL3	breast
SCAMP3	breast
ARPC5	breast
INTS1	breast
FAM50B	breast
UHRF1	breast
UFC1	breast
NBAS	breast
CYB5R2	breast
TBL1XR1	breast
PUS1	breast
PRSS29P	breast
ACP5	esophageal
RHOC	esophageal
BSG	esophageal
CD36	esophageal
CNN2	esophageal
CRMP1	esophageal
DNASE2	esophageal
DUSP3	esophageal
ELANE	esophageal
FEN1	esophageal
FUS	esophageal
FYN	esophageal
GNAL	esophageal
GNAT1	esophageal
GNAT2	esophageal
HDAC2	esophageal
IGBP1	esophageal
IMPA1	esophageal
INPPL1	esophageal
KPNA3	esophageal
KPNA4	esophageal
LCP2	esophageal
LPP	esophageal
LTBP2	esophageal
MCM6	esophageal
MKI67	esophageal
MYO9B	esophageal
NEFH	esophageal
PCBD1	esophageal
PLCB2	esophageal
PLXNA1	esophageal
PRRX1	esophageal
POLR2H	esophageal
PPM1A	esophageal
PPT1	esophageal
PRKAG1	esophageal
PRKCB	esophageal
HTRA1	esophageal
PSMD9	esophageal
RELA	esophageal
RFC5	esophageal
RPL10	esophageal
RPL26	esophageal
RPL27A	esophageal
RPS9	esophageal
RPS15A	esophageal
SRSF5	esophageal
SMARCD2	esophageal
SNRPD2	esophageal
STAU1	esophageal
STK3	esophageal
TCEA1	esophageal
TLE2	esophageal
TRIP6	esophageal
VAV2	esophageal
CLIP2	esophageal
PRRC2A	esophageal
TAF15	esophageal
RBM10	esophageal
TRRAP	esophageal
DHX16	esophageal
API5	esophageal
THOC5	esophageal
P4HA2	esophageal
STBD1	esophageal
NFS1	esophageal
PRPF3	esophageal
GTF3C4	esophageal
GIT2	esophageal
RBM12	esophageal
LPCAT3	esophageal
PRMT3	esophageal
RTN3	esophageal
CNPY2	esophageal
IFI30	esophageal
ATP5MG	esophageal
IGF2BP2	esophageal
KHDRBS3	esophageal
SLC12A7	esophageal
NUDC	esophageal
SRSF8	esophageal
SEC61B	esophageal
SLC27A3	esophageal
COPE	esophageal
CBX3	esophageal
ENPP4	esophageal
DIS3	esophageal
SNW1	esophageal
PDCD11	esophageal
PDS5B	esophageal
POGZ	esophageal
U2SURP	esophageal
SLC39A14	esophageal
CEMIP2	esophageal
SDF2L1	esophageal
APOL2	esophageal
MTHFD1L	esophageal
UBXN7	esophageal
TES	esophageal
FAM50B	esophageal
RANBP6	esophageal
PDLIM3	esophageal
UHRF1	esophageal
LMCD1	esophageal
RPL26L1	esophageal
SDF4	esophageal
HSD17B11	esophageal
PPME1	esophageal
DDX41	esophageal
ZFR	esophageal
KDM3B	esophageal
STRBP	esophageal
LRRC59	esophageal
ENAH	esophageal
APOBR	esophageal
RCC2	esophageal
MYDGF	esophageal
OLFML3	esophageal
WDFY1	esophageal
SRPRB	esophageal
SPCS3	esophageal
FKBP10	esophageal
RBM26	esophageal
GSDMD	esophageal
UBA5	esophageal
LPCAT1	esophageal
CYB5B	esophageal
CYRIA	esophageal
SNX27	esophageal
LAS1L	esophageal
ATAD3B	esophageal
HELZ2	esophageal
NEK9	esophageal
NEDD1	esophageal
NTAN1	esophageal
LYPLAL1	esophageal
CMPK2	esophageal
FAM91A1	esophageal
SLFN5	esophageal
FOXK1	esophageal
GNAT3	esophageal
MIA3	esophageal
PPIAL4G	esophageal
PPIAL4A	esophageal
PPIAL4C	esophageal
ARL3	lung
BCR	lung
BSG	lung
RCC1	lung
CHML	lung
PHC2	lung
ELAVL1	lung
ERCC4	lung
FUS	lung
GBA	lung
GMDS	lung
HDAC1	lung
HDAC2	lung
IGBP1	lung
KIF2A	lung
KIF5A	lung
KLC1	lung
LIG1	lung
MAP6	lung
MCM6	lung
NDUFA8	lung
RPL10A	lung
POLR2H	lung
MED1	lung
PPM1A	lung
PPP4C	lung
PRIM2	lung
PRPSAP1	lung
PSMD11	lung
RBBP7	lung
RFC5	lung
RPL28	lung
RPS8	lung
RPS9	lung
TRA2B	lung
SLC1A5	lung
SMARCE1	lung
SNRPA1	lung
SNRPB	lung
SNRPN	lung
STAU1	lung
SUPV3L1	lung
TCEA1	lung
TFDP1	lung
TOP2A	lung
UCHL3	lung
PRRC2A	lung
SF3A2	lung
RBM10	lung
ARID1A	lung
TRRAP	lung
DHX16	lung
EIF3D	lung
NOLC1	lung
SRSF11	lung
COPS2	lung
GTF3C4	lung
TECR	lung
MACROH2A1	lung
SPCS2	lung
SRA1	lung
GNE	lung
SMC4	lung
SAE1	lung
RBM12	lung
PRMT3	lung
CNPY2	lung
AGPAT1	lung
TAF6L	lung
PMVK	lung
CNPY3	lung
HPSE	lung
POP1	lung
CBX1	lung
MAPRE2	lung
PNKP	lung
CBX3	lung
DLGAP4	lung
DIS3	lung
MAPRE1	lung
PDCD11	lung
PDS5B	lung
MDN1	lung
RPRD2	lung
U2SURP	lung
NUDCD3	lung
SLC39A14	lung
ANP32C	lung
NUP62	lung
ATXN10	lung
AAR2	lung
LTN1	lung
FAM50B	lung
NBEA	lung
UTP25	lung
TRA2A	lung
DNTTIP2	lung
NDUFA13	lung
HGH1	lung
PHF21A	lung
PPME1	lung
DDX41	lung
VTA1	lung
GAR1	lung
HEATR5B	lung
RAB39A	lung
FNBP1L	lung
LRRC59	lung
NCBP3	lung
PPP4R3A	lung
IWS1	lung
IPO9	lung
RCC2	lung
EIF4ENIF1	lung
RCN3	lung
INTS2	lung
ABRACL	lung
METTL17	lung
MRPL32	lung
NUP37	lung
NAA16	lung
DCAKD	lung
CEP63	lung
PUS1	lung
PABPC1L	lung
ACAD10	lung
LAS1L	lung
QTRT1	lung
ATAD3B	lung
PYM1	lung
SARNP	lung
MAK16	lung
RBM17	lung
ALG2	lung
PNPT1	lung
TTC5	lung
OSBPL8	lung
RAVER1	lung
NAXE	lung
PGAM5	lung
CENPV	lung
ATAD3C	lung
ZNF326	lung
UBAC2	lung
IRF2BP2	lung
MIA3	lung
PPIAL4G	lung
PPIAL4D	lung
PPIAL4A	lung
PPIAL4C	lung
PPIAL4F	lung
PPIAL4E	lung
DDTL	lung
ACADM	lymphoma
ATP6AP1	lymphoma
BID	lymphoma
ERCC4	lymphoma
FEN1	lymphoma
FUS	lymphoma
IGBP1	lymphoma
ITPR2	lymphoma
KPNA4	lymphoma
LIG1	lymphoma
MCM6	lymphoma
NF1	lymphoma
RBBP7	lymphoma
RFC5	lymphoma
SLC1A5	lymphoma
STK3	lymphoma
TCEA1	lymphoma
TOP2A	lymphoma
CLPP	lymphoma
TRRAP	lymphoma
RANBP3	lymphoma
PPFIA2	lymphoma
THOC5	lymphoma
EIF3D	lymphoma
SRSF9	lymphoma
NAE1	lymphoma
NOLC1	lymphoma
SRSF11	lymphoma
GTF3C4	lymphoma
CPNE6	lymphoma
SMC4	lymphoma
RBM12	lymphoma
DNAJA2	lymphoma
IGF2BP2	lymphoma
POP1	lymphoma
DDX52	lymphoma
RABGAP1	lymphoma
ATXN10	lymphoma
MTHFD1L	lymphoma
PPME1	lymphoma
NBAS	lymphoma
EEF1AKNMT	lymphoma
QRICH1	lymphoma
FANCI	lymphoma
LYAR	lymphoma
IPO9	lymphoma
RCC2	lymphoma
CTNNBL1	lymphoma
ANAPC1	lymphoma
DDX54	lymphoma
TBL1XR1	lymphoma
LPCAT1	lymphoma
FBXL18	lymphoma
LAS1L	lymphoma
OSBPL10	lymphoma
CPNE2	lymphoma
ACP5	pancreas
CNN2	pancreas
COL8A1	pancreas
GSDME	pancreas
FBLN2	pancreas
FUT3	pancreas
FUT5	pancreas
FUT6	pancreas
GALNT3	pancreas
GBA	pancreas
KLC1	pancreas
LIG1	pancreas
LOXL1	pancreas
M6PR	pancreas
MYO7B	pancreas
MYO9B	pancreas
PLOD2	pancreas
POLR2H	pancreas
PRKCD	pancreas
HTRA1	pancreas
NECTIN2	pancreas
S100P	pancreas
SDC1	pancreas
TGFB1I1	pancreas
PPFIA2	pancreas
PDLIM4	pancreas
PLOD3	pancreas
GPRC5A	pancreas
QKI	pancreas
ARPC5	pancreas
IGF2BP2	pancreas
PMVK	pancreas
SLC44A1	pancreas
SPATS2L	pancreas
PDLIM3	pancreas
UGT1A10	pancreas
ASPN	pancreas
TIGAR	pancreas
NT5DC2	pancreas
ACSF2	pancreas
CYRIA	pancreas
ADPGK	pancreas
MRPS36	pancreas
OSBPL10	pancreas
CMPK2	pancreas
PGAM5	pancreas
UNC13D	pancreas
EHBP1L1	pancreas
FYB1	renal
HCLS1	renal
MCM6	renal
P2RX4	renal
PLOD2	renal
PLXNA1	renal
GNE	renal
FKBP10	renal
ANAPC1	renal

## Sheet: core markers
Type	Gene Symbol	plasma_mean_N	plasma_mean_T	plasma_ratio	plasma_t-test	tissue_N_percentage	tissue_T_percentage	tissue_mean_N	tissue_mean_T	tissue_ratio	tissue_t-test
BLCA	DNAJC2	0	0.282	58426.8	2.34e-276	0.9	1	0.112	1.454	12.93	0.0316
BLCA	EPHA1	0	0.486	100855	4.65e-260	0.2	0.6	0.007	0.115	17.69	0.0461
BLCA	FBXL18	0	0.269	55855.8	2.58e-288	0.5	1	0.029	1.026	35.11	0.00148
BLCA	GEMIN5	0	0.052	10835.6	5.52e-264	0.9	1	0.055	0.374	6.78	0.00377
BLCA	GUCY1B1	0	0.342	71047.5	2.7e-277	0.2	0.8	0.006	0.223	35.85	0.00435
BLCA	LGALSL	0	15.573	3.23091e+06	2.5e-235	0.4	0.8	0.047	0.563	11.93	0.0402
BLCA	PHF10	0	1.88	390030	0	0.2	0.6	0.009	0.171	18.68	0.0474
BLCA	PLOD3	0	0.421	87249	1.63e-271	1	1	0.254	1.914	7.55	0.000143
BLCA	PPFIA2	0	0.643	133421	7.93e-289	0.5	0.9	0.014	0.082	5.7	0.0324
BLCA	PPFIA4	0	0.717	148816	1.12e-297	0.3	0.7	0.001	0.024	18.13	0.0294
BLCA	PTCD1	0	3.133	649926	1.93e-303	0.4	0.8	0.003	0.019	7.69	0.0333
BLCA	SARM1	0	5.18	1.07471e+06	3.77e-251	0.1	0.6	0.003	0.073	23.54	0.0176
BLCA	SMC4	0	0.336	69774.3	3.73e-241	0.1	0.7	0.045	0.685	15.38	0.00466
BLCA	TCAF1	0	0.314	65154.3	2.73e-261	0.7	1	0.076	0.403	5.3	0.0252
BLCA	TFDP1	0	2.834	587920	0	0	0.6	0	0.471	47136.4	0.00225
BLCA	TMEM65	0	3.193	662386	3.14e-321	0.4	1	0.034	0.78	22.83	0.000364
BLCA	TOP2A	0	0.201	41711.9	3.44e-232	1	1	0.214	1.88	8.77	0.000161
BLCA	TRIP13	0	2.489	516420	2.75e-305	0.4	0.8	0.027	0.931	34.9	0.0113
BLCA	UBE2O	0	0.069	14264.4	7.91e-275	1	1	0.204	1.47	7.21	0.0055
BRCA	GALT	0	1.536	318698	3.8e-264	0.2	0.8	0.409	2.617	6.4	0.00454
BRCA	HMGN1	0	0.646	134015	6.333066e-317	0.1	0.8	0.654	6.04	9.23	0.000525
BRCA	MYL1	0	0.894	185481	7.48e-294	0.1	0.7	0.255	2.979	11.7	0.00408
BRCA	NBAS	0	0.269	55892.4	4.8e-275	0.1	0.7	0.393	3.828	9.75	0.00387
BRCA	PNN	0	0.226	46870.9	5.89e-227	0.4	1	1.198	11.658	9.73	0.00056
BRCA	SCAMP3	0	1.894	393038	1.51e-267	0.1	0.8	0.241	7.296	30.31	0.000393
BRCA	STAU1	0	0.315	65392.2	5.34e-272	0.2	0.9	0.262	7.369	28.17	0.000204
BRCA	TCEA1	0	0.258	53547.3	3.98e-283	0.1	0.8	0.717	4.866	6.79	0.000611
BRCA	UHRF1	0	2.165	449167	2.83e-304	0.1	0.6	0.112	1.409	12.6	0.0154
CRCA	ANAPC1	0	0.072	14999.3	1.08e-232	0.4	0.9	0.005	0.027	5.65	0.00562
CRCA	CDH11	0	0.435	90257.6	5e-234	0.3	0.9	0.029	0.333	11.47	0.00169
CRCA	CEMIP2	0	0.435	90172.8	1.63e-230	0.2	0.7	0.003	0.024	9.22	0.0179
CRCA	CILP	0	0.542	112501	2.9e-203	0.6	1	0.026	0.623	23.78	0.00319
CRCA	CNN2	0	0.909	188642	4.4e-234	1	1	1.87	15.49	8.28	1.32e-06
CRCA	FBLN2	0	0.364	75472.2	2.1e-193	1	1	0.293	4.245	14.46	0.000119
CRCA	FKBP10	0	0.212	44054.5	8.74e-252	0.7	0.9	0.063	4.361	69	0.0043
CRCA	GNB1L	0	1.037	215145	1.28e-263	0	0.7	0	1.901	190130	0.000427
CRCA	HELZ2	0	0.234	48586.4	3.49e-250	0	0.8	0	0.145	14453.2	2.24e-05
CRCA	LIG1	0	0.282	58497.5	4.37e-198	0.4	1	0.005	0.097	19.97	5.52e-05
CRCA	LMCD1	0	0.242	50235	8.71e-232	1	1	0.176	2.025	11.52	4.34e-06
CRCA	LTBP2	0	0.19	39509.6	8.53e-216	0	1	0	0.532	53165	3.19e-15
CRCA	MDN1	0	0.556	115430	7.59e-225	0.5	0.9	0.002	0.01	6.61	0.0121
CRCA	MTHFD1L	0	0.261	54249.7	2.18e-255	0.8	1	0.108	0.845	7.81	0.00449
CRCA	NEXN	0	0.367	76121.7	2.95e-247	1	1	0.216	1.327	6.14	0.00259
CRCA	PDCD11	0	0.166	34342.6	6.8e-215	1	1	0.063	0.327	5.16	7.58e-05
CRCA	PLOD3	0	0.165	34186.4	6.42e-235	1	1	0.668	5.092	7.63	0.000431
CRCA	POP1	0	0.241	50010.7	8.06e-214	0.5	1	0.015	0.083	5.63	0.00119
CRCA	RCN3	0	0.546	113358	1.34e-232	0.6	1	0.378	9.64	25.48	0.000618
CRCA	SMC4	0	0.527	109340	7.45e-212	0	0.6	0	0.689	68870.4	0.00286
CRCA	TCAF1	0	0.478	99205.9	3.65e-199	0.1	0.6	0.001	0.019	26.14	0.013
CRCA	UHRF1	0	2.168	449696	1.23e-249	0	0.8	0	0.04	4022.2	1.78e-05
CRCA	XPO4	0	0.405	84067.6	5.58e-208	1	1	0.038	0.206	5.44	0.000841
ESCA	ACP5	0	0.983	204036	3.46e-239	0.9	1	0.114	0.764	6.72	0.0186
ESCA	APOL2	0	0.857	177776	9.73e-232	0.2	1	0.011	1.332	123.04	4.09e-06
ESCA	ATAD3B	0	0.885	183678	2.27e-212	0.7	1	0.081	0.457	5.61	0.0107
ESCA	BSG	0	0.723	150052	2.41e-233	1	1	1.243	7.126	5.73	4.46e-05
ESCA	CEMIP2	0	0.167	34564	2.6e-208	0	0.8	0	0.025	2509.2	1.27e-05
ESCA	CLIP2	0	0.347	72021.9	1.47e-193	0.4	0.9	0.011	0.138	12.87	0.0102
ESCA	CMPK2	0	1.022	212018	6.38e-237	0.1	0.8	0.002	0.589	243.59	0.000202
ESCA	DDX41	0	0.853	176994	3.85e-233	0.4	0.8	0.004	0.044	10.51	0.0249
ESCA	DNASE2	0	3.6	746823	1.09e-301	0	0.7	0	0.261	26073.3	0.00034
ESCA	ELANE	0	1.331	276040	4.69e-243	0	1	0	0.444	44441	1.61e-14
ESCA	ENAH	0	0.185	38415.4	2.21e-200	0.4	1	0.023	0.784	34.32	5.99e-05
ESCA	ENPP4	0	0.261	54061.1	6.94e-189	0.1	0.7	0.004	0.021	5.07	0.00648
ESCA	FAM50B	0	0.448	92956	1.65e-260	0.2	1	0.005	0.09	19.52	2.41e-06
ESCA	FAM91A1	0	0.695	144136	3.86e-224	0.9	1	0.09	0.716	8	0.0481
ESCA	FEN1	0	0.449	93256.4	2.2e-190	0.9	1	0.209	1.111	5.32	0.0356
ESCA	FKBP10	0	0.185	38357.5	3.28e-237	0	1	0	1.993	199283	2.89e-19
ESCA	FOXK1	0	0.337	69898.6	3.24e-216	0.8	1	0.025	0.305	12.29	0.0037
ESCA	FUS	0	0.72	149431	2.03e-207	1	1	3.105	18.969	6.11	0.00289
ESCA	GNAL	0	0.891	184821	6.65e-191	0.7	1	0.02	0.227	11.3	0.00291
ESCA	GNAT1	0	1.047	217255	1.02e-199	0.2	0.6	0	0.008	22.54	0.0332
ESCA	GNAT2	0	1.04	215667	7.3e-200	0.2	0.6	0	0.007	22.66	0.0328
ESCA	GNAT3	0	1.023	212200	7.6e-199	0.2	0.6	0	0.007	22.66	0.0328
ESCA	GSDMD	0	0.131	27078.5	7.09e-252	0.7	1	0.115	0.815	7.06	0.00726
ESCA	GTF3C4	0	0.582	120708	1.35e-224	1	1	0.041	0.406	9.88	0.00514
ESCA	HELZ2	0	0.21	43549.7	4.2e-247	0.5	0.9	0.005	1.836	340.38	0.000536
ESCA	HSD17B11	0	0.888	184329	5.55e-215	0.7	1	0.049	0.876	17.87	0.00132
ESCA	HTRA1	0	0.16	33118.9	1.08e-258	0.7	1	0.02	0.664	33.1	0.000242
ESCA	IFI30	0	1.184	245744	3.79e-217	0	0.6	0	0.089	8884.4	0.00174
ESCA	IGF2BP2	0	0.531	110179	1.27e-211	0.1	1	0.002	1.804	1121.39	1.14e-10
ESCA	KHDRBS3	0	1.185	245940	4.92e-230	0.5	0.8	0.063	0.557	8.9	0.0492
ESCA	LCP2	0	0.184	38195.2	1.12e-230	0.5	1	0.031	0.293	9.36	0.000626
ESCA	LMCD1	0	0.207	42983	5.45e-200	1	1	0.216	2.721	12.59	0.000178
ESCA	LPCAT1	0	0.132	27357.9	7e-231	0.6	1	0.014	0.464	32.5	0.000284
ESCA	LPCAT3	0	1.235	256288	1.52e-222	0.7	1	0.089	0.787	8.88	0.00575
ESCA	LTBP2	0	0.173	35794.1	7.57e-210	0.1	0.9	0.003	0.096	34.09	2.97e-05
ESCA	LYPLAL1	0	1.144	237377	1.99e-205	1	1	0.344	3.547	10.31	0.00393
ESCA	MTHFD1L	0	0.163	33908.3	2e-227	0.2	1	0.002	0.294	149.21	1.42e-08
ESCA	MYDGF	0	0.714	148053	1.87e-242	0.9	1	0.907	4.944	5.45	0.0404
ESCA	MYO9B	0	0.129	26670.4	2.29e-225	0.5	1	0.004	0.158	36.74	0.000124
ESCA	NEFH	0	2.795	579782	5.86e-162	1	1	2.676	18.105	6.76	0.00241
ESCA	NFS1	0	0.131	27130.5	2.4e-206	0.9	1	0.052	0.687	13.15	0.0103
ESCA	NUDC	0	0.195	40373.5	7.49e-216	0.6	1	0.066	1.197	18.08	0.000861
ESCA	P4HA2	0	0.169	35123.6	1.35e-216	0.3	1	0.003	0.879	256.48	1.8e-07
ESCA	PDCD11	0	0.1	20843.4	5.13e-212	0.8	1	0.009	0.066	7.24	0.0307
ESCA	PLCB2	0	0.769	159582	7.07e-255	0	0.7	0	0.017	1727.3	0.00026
ESCA	PLXNA1	0	0.041	8576.94	4.72e-181	0.2	0.9	0.002	0.11	55.82	0.000712
ESCA	POLR2H	0	1.308	271447	3.16e-202	0.7	1	0.226	1.571	6.95	0.00729
ESCA	PPIAL4A	0	0.391	81050.6	6.29e-194	0.6	1	0.005	0.064	12.75	0.000425
ESCA	PPIAL4A	0	0.391	81050.6	6.29e-194	0.6	1	0.005	0.064	12.75	0.000425
ESCA	PPIAL4C	0	0.377	78132.6	1.39e-196	0.6	1	0.005	0.064	12.75	0.000425
ESCA	PPIAL4G	0	0.109	22572.7	6.27e-228	0.5	0.9	0.002	0.057	28.35	0.00199
ESCA	PPME1	0	1.79	371275	2.09e-205	1	1	1	5.449	5.45	0.0311
ESCA	PRKCB	0	0.545	112987	6.04e-177	0.4	0.9	0.013	0.119	9.07	0.0101
ESCA	PRPF3	0	0.196	40705.4	1.22e-220	0.4	0.9	0.049	0.433	8.81	0.00775
ESCA	PRRC2A	0	0.14	29020.7	9.49e-192	0.3	0.9	0.007	0.075	10.69	0.00105
ESCA	PRRX1	0	8.322	1.72663e+06	1.32e-259	0.3	0.9	0.008	0.277	35.29	0.00155
ESCA	PSMD9	0	4.431	919241	1.52e-262	0.3	0.8	0.146	0.792	5.44	0.0245
ESCA	RBM26	0	1.744	361911	1.93e-187	0	0.9	0	0.104	10383.1	1.82e-07
ESCA	RFC5	0	0.439	91072.4	1.06e-230	0.8	1	0.058	0.653	11.23	0.0031
ESCA	RTN3	0	0.346	71845.1	6.13e-198	0.1	0.9	0.004	0.301	79.48	1.47e-05
ESCA	SDF4	0	0.612	126923	1.94e-209	0.2	0.7	0.003	0.1	28.87	0.0107
ESCA	SEC61B	0	1.272	263865	6.92e-204	0.2	0.6	0.118	3.465	29.35	0.0465
ESCA	SLC12A7	0	0.537	111320	3.49e-211	0	0.7	0	0.031	3104.3	0.000414
ESCA	SLC39A14	0	1.166	241971	8.03e-239	0	0.8	0	0.72	72046.2	1.29e-05
ESCA	SLFN5	0	0.579	120181	1.89e-231	1	1	0.057	0.362	6.36	0.0129
ESCA	SNRPD2	0	0.948	196664	6.58e-228	1	1	7.749	40.897	5.28	0.000329
ESCA	SRSF8	0	0.4	82945.3	1.03e-242	0.5	1	0.388	2.054	5.29	0.00241
ESCA	STRBP	0	0.353	73264.2	1.1e-189	1	1	0.085	0.625	7.39	0.000238
ESCA	TCEA1	0	0.656	136177	1.65e-238	0.9	1	0.364	4.626	12.69	0.029
ESCA	TES	0	0.226	46843.3	1.39e-206	0.8	1	0.143	0.852	5.96	0.0201
ESCA	THOC5	0	0.693	143859	3.45e-217	0.3	1	0.004	0.253	64.68	8.88e-06
ESCA	TRRAP	0	0.181	37507	8.7e-190	0.9	1	0.007	0.094	13.17	0.00211
ESCA	UHRF1	0	0.944	195772	2.59e-234	0.3	1	0.005	0.135	27.63	1.93e-05
ESCA	VAV2	0	0.094	19465.7	1.84e-197	0.3	0.7	0.003	0.221	69.89	0.0202
ESCA	WDFY1	0	0.611	126748	3.76e-260	0.7	1	0.058	0.328	5.67	0.00848
LC	AAR2	0	3.002	622775	0	0.6	0.9	0.042	0.506	12	0.0313
LC	ABRACL	0	4.058	841896	0	1	1	2.013	20.597	10.23	9.96e-07
LC	ACAD10	0	0.26	53839.2	4.82e-302	0.2	1	0.006	0.162	29.02	8.76e-07
LC	AGPAT1	0	0.367	76243	0	0.6	0.9	0.04	0.222	5.55	0.0469
LC	ANP32C	0	0.338	70181.6	0	1	1	0.343	4.123	12.04	1.37e-05
LC	ARID1A	0	0.237	49081.2	4.57e-286	1	1	0.031	0.392	12.82	4.04e-07
LC	ATXN10	0	2.277	472321	0	1	1	0.118	1.294	10.94	8.3e-05
LC	CBX1	0	0.617	128020	0	1	1	3.173	34.439	10.86	3.24e-07
LC	CENPV	0	0.669	138810	0	0.7	1	0.119	1.914	16.05	0.00222
LC	CEP63	0	0.118	24459.2	5.11061091e-315	0.3	0.7	0.015	0.119	8.04	0.0494
LC	CHML	0	0.482	99928.7	0	0.2	0.8	0.006	0.043	7.73	0.00506
LC	CNPY3	0	0.691	143440	0	0.1	0.6	0.006	0.271	46.05	0.0175
LC	DDX41	0	2.655	550740	0	0.6	1	0.021	0.212	10.34	0.000884
LC	DHX16	0	0.983	203965	2.47e-321	1	1	0.066	0.585	8.82	2.06e-07
LC	DIS3	0	0.362	75083.2	0	1	1	0.117	0.606	5.19	0.000155
LC	DNTTIP2	0	0.279	57945.8	0	0.4	1	0.011	0.178	16.01	0.000378
LC	EIF3D	0	1.291	267820	0	1	1	0.865	4.642	5.37	0.000496
LC	EIF4ENIF1	0	1.428	296184	0	0.1	0.9	0	0.377	804.57	6.28e-06
LC	ERCC4	0	0.192	39871	0	0.5	0.9	0.006	0.069	11.18	0.00456
LC	FAM50B	0	0.443	91902.7	0	0.6	1	0.021	0.322	15.09	0.000904
LC	FNBP1L	0	23.941	4.96697e+06	0	0.7	1	0.028	0.958	34.67	0.00133
LC	GMDS	0	1.063	220526	0	1	1	0.179	2.082	11.64	3.08e-05
LC	GNE	0	0.171	35465.5	0	0.8	1	0.03	0.33	10.99	0.00211
LC	GTF3C4	0	0.189	39205.5	0	1	1	0.093	0.581	6.27	4.14e-05
LC	HDAC2	0	0.239	49522	2.1937e-320	1	1	0.55	3.344	6.08	2.54e-05
LC	HEATR5B	0	0.094	19462.1	2.22e-298	0.7	1	0.005	0.073	14.74	0.000968
LC	HPSE	0	0.143	29719.4	0	0	0.8	0	0.31	31036.2	1.93e-05
LC	INTS2	0	0.113	23485.6	0	0.3	0.9	0.002	0.032	15.12	0.000605
LC	IPO9	0	0.237	49182.7	0	1	1	0.459	8.844	19.27	0.000495
LC	IWS1	0	0.493	102314	0	0.5	0.9	0.03	0.174	5.81	0.0133
LC	KIF5A	0	0.721	149496	1.39e-283	1	1	0.042	0.337	8.13	1.71e-05
LC	LAS1L	0	0.275	57157.1	0	0.8	1	0.035	0.261	7.37	0.00613
LC	LIG1	0	0.145	30185.1	0	0.2	0.9	0.002	0.579	376.28	9.69e-06
LC	MAK16	0	1.781	369604	0	0.5	1	0.012	0.216	17.95	0.000337
LC	MAP6	0	0.132	27411.4	0	0	0.6	0	0.047	4731.4	0.00282
LC	MCM6	0	0.124	25817.1	0	0.8	1	0.023	5.934	253.57	2.12e-06
LC	MDN1	0	0.61	126646	2e-323	0.4	0.9	0.001	0.095	117.59	0.000234
LC	MED1	0	0.131	27143.7	0	0.5	1	0.002	0.041	21.07	6.05e-05
LC	METTL17	0	0.506	104878	0	0	0.7	0	0.054	5428.3	0.00031
LC	MRPL32	0	5.741	1.19104e+06	0	0.1	0.6	0.002	0.085	56.61	0.0104
LC	NAA16	0	0.581	120445	0	1	1	0.028	0.215	7.76	0.00319
LC	NBEA	0	0.091	18966.6	1.55e-282	1	1	0.004	0.106	30.09	1.34e-06
LC	NCBP3	0	0.332	68956.1	0	0.8	1	0.081	0.584	7.19	0.0179
LC	NOLC1	0	0.132	27468.4	0	0.3	1	0.017	0.356	20.76	3.19e-05
LC	NUDCD3	0	0.406	84301.6	0	0.9	1	0.049	0.508	10.32	0.0136
LC	NUP62	0	0.626	129892	0	1	1	0.301	2.051	6.82	0.00153
LC	PDCD11	0	0.248	51356.9	6.34e-294	0.7	1	0.013	0.137	10.43	0.00858
LC	PGAM5	0	0.617	127949	0	1	1	0.43	6.633	15.41	4.76e-07
LC	PHC2	0	2.223	461141	0	0.9	1	0.044	1.006	22.92	0.000286
LC	PHF21A	0	0.536	111295	0	0.2	0.7	0.004	0.097	27.26	0.0145
LC	PNPT1	0	0.194	40283.6	0	1	1	0.116	0.904	7.82	0.000125
LC	POP1	0	0.456	94614.2	0	0.8	1	0.007	0.216	29.32	0.000472
LC	PPIAL4A	0	0.421	87295.1	1.75e-275	1	1	0.05	0.854	17.09	0.00754
LC	PPIAL4A	0	0.421	87295.1	1.75e-275	1	1	0.05	0.854	17.09	0.00754
LC	PPIAL4C	0	0.362	75191.4	3.06e-288	1	1	0.05	0.854	17.09	0.00754
LC	PPIAL4D	0	0.421	87295.1	1.75e-275	1	1	0.05	0.868	17.37	0.00749
LC	PPIAL4E	0	0.421	87295.1	1.75e-275	1	1	0.05	0.868	17.37	0.00749
LC	PPIAL4F	0	0.421	87295.1	1.75e-275	1	1	0.05	0.868	17.37	0.00749
LC	PPIAL4G	0	0.351	72843.8	3.49e-288	1	1	0.043	0.94	21.98	0.0249
LC	PPME1	0	0.761	157921	0	1	1	0.394	6.304	16.01	9.86e-08
LC	PPP4C	0	0.592	122893	0	1	1	0.237	1.952	8.24	0.000534
LC	PPP4R3A	0	0.14	29080	0	1	1	0.058	0.801	13.8	7.24e-07
LC	PRIM2	0	0.137	28376.6	2.950110077062e-311	0.1	1	0.001	0.251	272.79	6.99e-10
LC	PRMT3	0	0.145	30021.1	0	0.1	0.7	0	0.11	251.15	0.00169
LC	PRRC2A	0	0.097	20134.7	0	0.7	1	0.023	0.227	9.87	0.00272
LC	PUS1	0	0.8	165901	0	1	1	0.108	0.606	5.59	0.000151
LC	RAB39A	0	0.198	40999.6	0	0.2	0.7	0.003	0.551	164.11	0.00682
LC	RAVER1	0	0.224	46404.3	0	1	1	0.232	1.379	5.94	0.000127
LC	RBBP7	0	0.146	30375.1	0	1	1	1.726	13.74	7.96	9.45e-07
LC	RBM10	0	0.187	38831.2	0	1	1	0.093	0.644	6.94	1.63e-05
LC	RBM17	0	0.678	140638	1.98e-272	1	1	0.148	1.015	6.84	1.27e-05
LC	RCC1	0	0.481	99806.4	0	1	1	0.73	4.534	6.21	1.2e-07
LC	RCC2	0	0.281	58397.4	0	1	1	0.409	14.894	36.39	5.36e-08
LC	RFC5	0	0.656	136178	0	1	1	0.077	1.747	22.79	1.92e-10
LC	RPRD2	0	0.314	65183	0	0.9	1	0.032	0.383	12.13	0.00122
LC	SF3A2	0	0.535	111073	0	1	1	0.301	1.67	5.55	0.000345
LC	SLC1A5	0	0.841	174407	0	1	1	0.217	1.266	5.84	0.000295
LC	SLC39A14	0	0.61	126515	0	0.2	0.8	0.019	0.369	19.18	0.00186
LC	SMC4	0	0.371	76921.9	2.1362627566e-314	0	1	0	2.51	250975	2.26e-13
LC	SNRPB	0	0.852	176698	0	1	1	2.514	26.271	10.45	3.96e-05
LC	SNRPN	0	0.878	182100	0	1	1	2.429	25.316	10.42	4.15e-05
LC	SRA1	0	0.433	89763	0	0.9	1	0.097	0.533	5.53	0.023
LC	SRSF11	0	0.637	132194	0	1	1	0.923	11.679	12.65	3.98e-08
LC	TAF6L	0	0.525	108909	0	0.1	0.7	0.002	0.129	63.81	0.00258
LC	TCEA1	0	0.235	48699.3	0	1	1	0.615	4.514	7.34	9.67e-07
LC	TFDP1	0	0.999	207244	0	0	0.8	0	0.164	16364.2	1.69e-05
LC	TOP2A	0	0.112	23203.8	0	1	1	0.047	1.699	36.52	5.97e-07
LC	TRA2A	0	0.24	49872.9	5.76e-303	0.9	1	0.599	6.236	10.4	0.0126
LC	TRA2B	0	15.718	3.26106e+06	1.3e-298	1	1	1.944	35.984	18.51	1.12e-06
LC	TRRAP	0	0.069	14345.8	0	0.9	1	0.014	0.233	16.14	0.0015
LC	TTC5	0	0.656	136022	0	0.5	1	0.026	0.359	14.06	0.000358
LC	UBAC2	0	1.983	411493	0	0.6	0.9	0.03	0.675	22.63	0.0382
LC	UCHL3	0	10.075	2.09015e+06	1e-242	1	1	0.461	2.666	5.78	0.00134
LC	UTP25	0	0.584	121243	0	0	0.8	0	0.04	3978.2	1.28e-05
ML	ANAPC1	0	0.709	147107	4.01e-265	0.9	1	0.018	0.921	51.32	0.0114
ML	CPNE2	0	0.521	108109	2.22e-212	1	1	0.239	1.293	5.42	0.00664
ML	CPNE6	0	0.2	41454.4	6.88e-203	1	1	0.1	0.901	9.03	0.0159
ML	DDX54	0	0.653	135555	5.540610179557e-311	1	1	0.187	1.477	7.91	0.00922
ML	ERCC4	0	0.443	91861.5	0	0.8	1	0.029	0.159	5.45	0.0232
ML	FANCI	0	0.161	33486.9	0	0.4	1	0.02	0.249	12.14	0.000182
ML	FBXL18	0	0.538	111551	1.24e-264	0.5	0.9	0.009	0.216	23.75	0.00552
ML	FUS	0	0.593	123013	2.52e-289	1	1	5.373	27.534	5.12	0.001
ML	IGF2BP2	0	0.665	138042	3.39e-260	0.4	0.9	0.045	0.955	21.26	0.00884
ML	IPO9	0	0.492	101984	3.71e-225	1	1	0.355	2.436	6.86	0.00406
ML	MTHFD1L	0	0.278	57632.6	0	1	1	0.104	0.601	5.78	0.000394
ML	NF1	0	0.136	28294.3	5.83e-212	0.5	0.9	0.014	0.117	8.37	0.026
ML	RFC5	0	0.657	136351	9.45e-295	1	1	0.382	2.438	6.38	1.25e-05
ML	SMC4	0	0.604	125357	1.88e-241	0.7	1	0.117	0.878	7.53	0.00437
PAAD	COL8A1	0	0.082	17101	5.43e-199	0.8	1	0.123	2.798	22.83	0.0156
PAAD	GPRC5A	0	3.613	749552	4.35e-220	0.6	1	2.534	16.579	6.54	0.00705
PAAD	HTRA1	0	2.062	427766	5.47e-173	0.9	1	0.273	2.393	8.78	0.033
PAAD	IGF2BP2	0	0.22	45672.2	1.21e-220	1	1	0.158	0.947	5.99	5.83e-05
PAAD	LIG1	0	0.397	82355.7	1.53e-167	0.4	0.8	0.004	0.037	8.51	0.0315
PAAD	MYO7B	0	0.092	19022.5	1.89e-161	0.1	0.8	0	0.025	320.15	9.12e-05
PAAD	NECTIN2	0	0.053	10925.5	1.21e-231	1	1	0.256	2.117	8.27	0.0165
PAAD	NT5DC2	0	0.526	109090	2.68e-196	0.8	1	0.097	0.499	5.15	0.0217
PAAD	PLOD2	0	0.273	56573.2	4.87e-264	0.7	1	0.087	1.117	12.78	0.00363
PAAD	S100P	0	10.892	2.25973e+06	1.84e-190	0.9	1	6.472	51.552	7.96	0.0168
PAAD	SDC1	0	4.799	995746	2.61e-197	0.3	0.7	0.04	0.592	14.67	0.0425
PAAD	UGT1A10	0	0.187	38815.9	4.88e-213	0.1	0.8	0.003	0.719	255.79	0.00017
RCC	ANAPC1	0	0.042	8651.24	4.47e-290	0.7	1	0.002	0.014	5.76	0.0185
RCC	FKBP10	0	0.297	61697.4	5.57e-277	1	1	0.352	2.557	7.26	0.0105
RCC	FYB1	0	4.854	1.007e+06	3.34e-284	0.2	0.7	0.01	0.104	10.33	0.0228
RCC	HCLS1	0	0.937	194443	4.79e-279	1	1	0.333	1.675	5.03	0.00377
RCC	MCM6	0	0.257	53306.6	4.1e-257	0.3	0.9	0.022	0.159	7.16	0.00732
RCC	P2RX4	0	0.557	115640	0	0.6	0.9	0.017	0.105	6.19	0.049
RCC	PLOD2	0	0.288	59778.8	2.81e-305	0.4	0.9	0.109	5.122	46.78	0.00448
