# Supplementary material for: Plasma proteomic profiling of pan-cancer patients discovers biomarkers of cancers
Source: Research Square preprint supplement (doi:10.21203/rs.3.rs-939549/v1), 2021-10-05
Supplement: Supplementary file 2 [file 62f2787b2a0e844bb0d95012.xlsx]

## Sheet: Description
Sheet	Description
NMF_Cluster_proteins	top 3000 coefficient of variance proteins for NMF cluster
NMF_cluster	Samples NMF cluster results
Enrichment score	Tumor type enrichment score of each NMF cluster
CCP_Cluster_proteins	Significantly expressed proteins among clusters
CCP_Cluster	Protein groups based on sample clusters
Gene_group_x	over-representation analysis (ORA) and sumer results for proteins with each gene group
Gene_group_x
Column	Description
Gene Set	Gene Set ID
Gene Set Description	Gene Set name
GeneRatio	The ratio of k/n k: size of the overlap of protein group specific Gene Set; n: size of the overlap of protein group with all the members of the Gene Set
BgRatio	The ratio of M/N M: size of the Gene Set; N: size of all of the unique proteins in the collection of Gene Sets
P value	P value for ORA
P.adjust	P value adjusted by Benjamini-Hochberg
Gene Symbol	Gene Symbols for protein in specific Gene Set
Count	The count of Gene Symbol
Sumer	top 50 selected by Sumer algorithm
Sumer_score	Sumer scores for specific Gene Set

## Sheet: NMF_cluster_proteins
Gene_Symbol	Coefficient of Variance
ATP6V0D1	32.6139
CARM1	31.3377
BLOC1S1	29.8628
GEMIN5	29.6594
PCDHGC3	28.0551
MGAM2	27.4452
DDX50	27.0245
TFAM	26.6954
RPS13	26.0945
KRT82	25.8571
CCDC97	25.8325
THOC7	25.8171
RPL10	25.6926
GCFC2	25.6224
CD209	25.5133
FAM151A	25.3141
DOCK4	25.2835
OGA	25.2306
COMMD8	25.1725
PELO	25.1209
PTBP2	24.8447
ANGPTL2	24.7625
KHNYN	24.7167
RAB31	24.4456
MTCH1	24.0856
TMTC3	23.7669
ADH7	23.6951
CYRIA	23.5156
PNO1	23.0345
PTPRCAP	22.8944
PIGS	22.7797
IGFBP1	22.7232
MBLAC2	22.5573
SEC14L3	22.4667
SNRPC	22.313
PAIP1	21.9364
WIPF1	21.8611
TARS3	21.6676
EXOC5	21.6332
SYNJ2BP	21.5999
DDX20	21.5187
P2RY12	21.3053
CZIB	21.2799
NT5DC2	21.0927
PTDSS2	20.9353
MOB1A	20.4503
MOB1B	20.4503
PIP4K2B	20.4159
MUC16	20.3494
CHMP4B	20.3413
SVEP1	20.2352
CARMIL1	20.2182
IQSEC1	20.2007
HCCS	20.1817
RHOT1	20.1796
DCX	20.0237
ZMYND8	20.0053
NOSIP	19.9601
MAN1A2	19.9407
RPS24	19.9018
PAK3	19.8919
MTTP	19.8916
ANKRD44	19.7287
SEPHS1	19.619
RELN	19.5696
GTF3C3	19.5693
ZRANB2	19.2248
FAM160A2	19.221
ADNP	19.2179
PDK4	19.1775
CARHSP1	19.1596
DAB2	19.1252
EXT1	19.0853
TMED4	18.9963
PRRC1	18.9798
HS1BP3	18.9115
SLC27A3	18.895
PFKFB1	18.7622
IL4I1	18.6865
FMNL2	18.6511
RXRA	18.6382
CAB39L	18.5162
GALNT3	18.437
MAPK11	18.4204
RNF123	18.3145
GALNS	18.2751
PTX3	18.2016
SETD3	18.1854
SOWAHC	18.1238
NRBP1	18.0832
TBC1D4	18.0691
SCGN	18.0333
MTCH2	17.8608
CHCHD2P9	17.7617
BICDL2	17.5803
TRMT1L	17.5562
MAVS	17.5111
RPS5	17.4707
KMT2A	17.4493
FASTKD2	17.4386
IVL	17.4371
RPL7L1	17.4345
MEP1A	17.4255
GBP2	17.3303
CRYBG1	17.2669
EEF1AKNMT	17.1457
STRBP	17.0942
RTN4IP1	17.0607
PRXL2B	16.9718
SIGLEC1	16.8872
CHAMP1	16.8172
DIAPH2	16.78
RPL11	16.7361
PCDH1	16.6511
POM121	16.5895
CHCHD4	16.5658
DUOX2	16.5439
ZNF638	16.5354
MON2	16.5326
ELMO3	16.4984
AIF1L	16.4867
ADGRL4	16.4803
DAGLB	16.4778
TXNDC12	16.4306
HAX1	16.4297
SMYD3	16.4217
RPTOR	16.4192
LRP1B	16.3948
CLEC4M	16.3402
GFM2	16.2993
SNX3	16.244
MICOS13	16.2203
NDUFA2	16.2085
FES	16.1602
ABCC4	16.1397
CDK12	16.1181
MAPK12	16.0804
SEC14L2	16.0643
ETV6	16.0042
PDZD11	16.002
EFNA1	15.9574
SNW1	15.9403
CD46	15.9395
PLEKHA6	15.9014
FAM83F	15.762
COG8	15.7572
ATPAF2	15.75
MAPK8	15.7354
DTD1	15.7247
TRAPPC13	15.7239
LDLR	15.7105
AOX1	15.7101
CAP2	15.6974
RFC4	15.6926
AGFG1	15.6852
PDLIM4	15.6599
RMI2	15.6453
SUGP2	15.6387
GIMAP7	15.6241
CRYM	15.6032
RPL35	15.5875
BDH1	15.5574
DCP1A	15.5408
PFKFB3	15.5372
CYLD	15.5186
METTL3	15.4909
PIPSL	15.4095
ZC3H15	15.399
RNPS1	15.386
RCN3	15.3743
ATP6V1G1	15.3482
XPO4	15.2722
POM121C	15.2614
SLC1A2	15.2443
MGST3	15.24
AUH	15.2151
RBM17	15.2092
SPCS3	15.2007
NDE1	15.1643
LANCL2	15.1459
ATP8A1	15.0927
SYTL4	15.0855
LPGAT1	15.0475
NCSTN	15.0348
EIF2B2	14.9939
POFUT2	14.9842
ERMN	14.9676
UCHL5	14.9465
SZT2	14.9241
EDC3	14.8711
PXN	14.8172
MRPL45	14.7976
CNOT10	14.7814
CREBBP	14.7813
EP300	14.7813
CPNE8	14.7759
APOBR	14.7658
SELENOM	14.7539
SOGA1	14.7248
TOR1A	14.6802
BRD4	14.6653
PCYOX1L	14.6291
RAI14	14.6239
PUM1	14.5652
UTP14A	14.553
ITM2B	14.5457
PTPN13	14.5318
SRGAP2	14.5249
KLHDC4	14.4982
FAM114A1	14.4906
MYO5B	14.4863
EIF4H	14.4592
GBP3	14.4456
PLD4	14.4376
NMNAT1	14.4227
HACD2	14.4049
NUDT21	14.3889
MAMDC2	14.384
CDC42EP1	14.3661
RXRG	14.3583
ASCC1	14.3219
ARHGAP9	14.2904
NECAP1	14.2865
FERMT1	14.2809
ATRX	14.2097
GTF2E2	14.2088
IGLV2-14	14.2031
CASKIN2	14.1897
MOCS3	14.1876
NACA	14.17
CD151	14.1374
ELOVL1	14.1196
PFKFB4	14.1152
LSM1	14.0971
AVL9	14.0927
NUDC	14.0607
ABHD17C	14.0556
LSR	14.0388
TTC9C	13.9699
DPP8	13.9651
TMOD1	13.9628
ASRGL1	13.8896
CHUK	13.8781
PAXX	13.8695
NELL2	13.8647
MAPK10	13.8612
PNN	13.8459
YTHDF3	13.8451
BRD7	13.8397
MTCL1	13.8359
NDUFA5	13.7999
BSN	13.7982
NCBP2	13.7314
VBP1	13.7169
USP12	13.6184
USP46	13.6184
NUB1	13.6102
RBM3	13.5994
DNMT1	13.5942
XRN1	13.585
GNA12	13.5754
PRX	13.5706
CALB2	13.5595
POFUT1	13.5424
RXRB	13.5373
ANAPC1	13.5356
THSD4	13.5331
RAB3D	13.5202
SQLE	13.5153
EMC2	13.4959
INTS10	13.4836
DDX60	13.4749
PTPRT	13.4646
DHX57	13.4409
HECTD4	13.4335
GLA	13.4256
UGT1A10	13.4007
OXR1	13.3964
SBNO1	13.3714
BLOC1S3	13.3501
CSNK2A2	13.3457
PTBP3	13.3398
JAK1	13.3011
NMT2	13.2891
UGT1A8	13.2841
RBMXL2	13.282
FMNL3	13.2412
GTF3C1	13.2348
NFASC	13.2304
PRKG1	13.2088
ACSM2B	13.1864
UCK2	13.1848
MPHOSPH8	13.1731
TRAF2	13.171
GGTLC1	13.0766
RNF214	13.0468
SERPINA2	13.0208
POLRMT	13.0042
HELLS	13.0024
COPS7B	12.9814
PIGU	12.9702
OSGEP	12.9511
EIF3K	12.9352
UGT1A9	12.9313
FN3KRP	12.9279
DDX24	12.9116
ACADSB	12.9029
OS9	12.878
BLOC1S4	12.8425
PPIL3	12.8296
EHD3	12.8287
CHMP3	12.8277
S100A10	12.804
ABR	12.801
CPSF7	12.7901
MAT1A	12.7702
CDK2AP1	12.7553
TBC1D24	12.7504
FAM91A1	12.7342
FBXL2	12.7329
ABCB7	12.7119
SH2B1	12.7065
TRIM72	12.7023
SLC37A4	12.6888
RBM6	12.6768
THOC1	12.6758
NEDD8	12.6678
PALM	12.6488
CORO2B	12.643
PLIN4	12.6415
AQP9	12.6377
WDR55	12.6349
DMXL2	12.6253
RAB29	12.6161
PRPS2	12.6158
UBE4B	12.606
TTI1	12.6007
CLCA4	12.5954
ARMH3	12.5567
NUBP2	12.5527
TRAPPC9	12.5461
ATP2C1	12.5353
LCMT1	12.5327
GGACT	12.5311
PPP2R5C	12.5078
WDR91	12.4983
CCDC22	12.4903
TDP2	12.4744
RPL7A	12.4485
CD48	12.4323
LGI4	12.4314
RBM23	12.4284
MRPL55	12.4168
LILRA4	12.4024
CDC23	12.3951
YIF1A	12.3676
CDK13	12.3655
NCAPD2	12.3492
ZNF385A	12.3451
PLA2G15	12.3234
PTGS1	12.3049
ARMC6	12.294
LRATD2	12.2849
GPRC5A	12.2564
NDUFS7	12.238
PIK3CB	12.2353
CRNN	12.2343
AQP2	12.2296
SLC29A1	12.2268
PLA2G4A	12.2155
EPHB4	12.207
SRGAP2B	12.2021
GADD45GIP1	12.1926
OSBPL11	12.1846
NDUFA7	12.1821
TCL1A	12.1627
COBLL1	12.1546
IGHV1-69D	12.1278
PGM2L1	12.1049
ST6GAL1	12.0972
AASDHPPT	12.0943
HLA-DRB3	12.079
RPS15A	12.0753
NUP58	12.0667
INO80E	12.0457
ANXA8	12.0448
CAMK4	12.0439
BNIP2	12.0395
SNX18	12.0363
GTF2F1	12.0266
NOC4L	12.0203
SSU72	12.0154
TGOLN2	12.0026
HTT	11.9952
EED	11.9948
GNL1	11.9901
TLR3	11.9821
PKHD1L1	11.9811
GRWD1	11.9691
SOGA3	11.9575
ARHGEF2	11.9554
RAB22A	11.9506
ZC3H4	11.9441
LILRA6	11.9224
NOL7	11.9074
KIF21A	11.9058
PSMD7	11.8989
YTHDC2	11.8917
GGA2	11.8749
PIK3AP1	11.8545
SLC12A9	11.8288
PIK3R2	11.8236
TMED3	11.8198
MISP	11.8183
NELFCD	11.803
ACYP1	11.8004
MAPK13	11.769
GTF3C2	11.7625
MANSC1	11.755
PLCB3	11.7442
PRUNE2	11.7343
CTAGE1	11.7316
CYP3A5	11.7089
ST14	11.7087
HS2ST1	11.6987
EML3	11.6877
BCL2L13	11.6815
QKI	11.6758
CST4	11.6746
CETN2	11.667
XPO6	11.6647
ATAT1	11.6582
SCYL3	11.651
ISG20	11.6262
COQ9	11.6237
PPP1R14B	11.6185
DIABLO	11.6108
DGKZ	11.6107
IGHV1-8	11.6025
PLD1	11.5915
CACYBP	11.5762
SNRPB2	11.575
NKIRAS2	11.5642
DNAJC19	11.5596
GALNT5	11.5437
VAMP7	11.5149
RPS9	11.508
ITGB5	11.5078
NADK	11.5059
IFIT5	11.5037
TRIM65	11.4811
PRH1	11.4742
INTS7	11.4586
SRGAP2C	11.4579
TBC1D9B	11.4511
AK4	11.4506
RPS21	11.4479
CBFB	11.4129
CHCHD2	11.4049
PAK1	11.388
KIF1B	11.3811
SARDH	11.3796
COL6A5	11.3756
RBSN	11.3573
FAM120C	11.3139
RRP1B	11.2984
MGAT2	11.2956
ERLIN1	11.2852
COQ10B	11.2834
GSKIP	11.2813
TRHDE	11.2777
ATP1B3	11.2685
RAB3GAP1	11.2655
PALD1	11.2577
MRPL39	11.255
CREG1	11.2481
HEPACAM	11.2294
GMPR2	11.2232
RPE	11.2091
FRY	11.2069
CEBPZ	11.1858
RBM22	11.1806
PSMB8	11.1733
SET	11.1683
MRPL2	11.1613
RPL18	11.1575
SLC27A1	11.1467
FDPS	11.146
MMAB	11.1323
ASCC2	11.1302
SMN1	11.1292
SREK1	11.1271
SRBD1	11.1181
TRRAP	11.1032
SNRPA1	11.0885
LMF2	11.088
PYCR3	11.057
YLPM1	11.0483
COQ7	11.0449
DCLK2	11.0366
BRK1	11.0107
TAB1	11.0019
TNNC2	10.9817
LRCH4	10.9779
LY75	10.977
PCF11	10.9738
CIAPIN1	10.9613
YIPF3	10.9312
ELFN1	10.9284
GGT5	10.9103
ATP12A	10.9085
COL5A3	10.8836
ISG20L2	10.8828
WASL	10.8785
MAP7	10.8762
LPXN	10.8757
CNPY4	10.8714
DDB2	10.8635
TNPO2	10.8335
HMGA1	10.8121
MRPS35	10.8072
RIPOR1	10.802
CST1	10.7938
LARP7	10.7918
CWC15	10.7894
NPEPL1	10.7887
APRT	10.7782
CDK18	10.7652
UBE2Q1	10.7556
FNTB	10.7254
ARHGAP26	10.7151
ANXA8L1	10.674
FAM120A	10.6728
CEMIP	10.6664
CAMK2G	10.6631
EXT2	10.6438
HSPA14	10.6263
COMMD2	10.621
DLG2	10.6117
DNAJB12	10.6061
PIH1D1	10.5866
USF1	10.5826
KIF13A	10.5802
MRPL9	10.5745
ZC3H7B	10.5727
PEX11B	10.5435
TMEM222	10.5336
ABI1	10.5214
SDC1	10.5206
LMAN2L	10.5142
CR1L	10.511
TFPI	10.5004
RIPK2	10.4844
LILRB2	10.475
MTA1	10.4742
BTF3L4	10.4712
EXOG	10.4656
RGCC	10.4648
FUNDC1	10.4417
RPS27L	10.4353
VPS72	10.4341
OLFML1	10.4242
FUOM	10.4124
MFAP4	10.4032
ADGRD1	10.3989
RUFY3	10.3927
AMPH	10.392
BLOC1S2	10.3805
ARMC10	10.3805
AGXT	10.3711
C1orf52	10.3567
ACSL6	10.3563
GOLIM4	10.3477
HSPA4L	10.3367
DDX56	10.3084
TEP1	10.304
ERBIN	10.3008
RIOX2	10.2895
FGFR2	10.2791
TOMM22	10.277
GRIA2	10.2719
TUBG1	10.2696
CAMKV	10.267
SCAF1	10.2658
HTRA2	10.2549
HBZ	10.254
ARSD	10.2447
TANC1	10.2376
TMEM97	10.2366
GPD1	10.2281
ANKS1A	10.2214
PAFAH1B1	10.2172
TRMT2A	10.2159
CBX8	10.2013
HMCN1	10.1946
OSBPL2	10.1834
RNASE3	10.1753
SHFL	10.1637
SP140L	10.1605
BTN3A3	10.1571
TRMT112	10.1538
ASMTL	10.1502
TUBB2B	10.1461
KBTBD11	10.1336
TGFBR3	10.1228
NDUFB11	10.1181
MRPL21	10.1074
TPPP	10.1051
TUBB2A	10.1022
VAMP3	10.1001
LIPF	10.0957
UBE2V2	10.0934
EIF2A	10.0743
FRYL	10.0729
GOT2	10.0662
PTPRE	10.0635
HM13	10.0629
SPART	10.0571
RPL19	10.0482
FOCAD	10.0478
SRR	10.0464
FOLH1	10.0395
STAG2	10.0027
HGD	9.99284
PODXL2	9.98652
SUPT3H	9.98348
COX1	9.96663
KAT7	9.96158
CD34	9.96151
WIPI2	9.95839
GPC6	9.95584
AHCTF1	9.93227
SPATS2L	9.91208
VAMP2	9.90233
ATF6B	9.89074
MSRA	9.88859
ACSM3	9.88276
CAMK2B	9.87828
NDC80	9.87572
TSTD1	9.84042
TRNT1	9.84008
TAF15	9.82827
STX11	9.82798
AAK1	9.79822
DYNC1LI2	9.78688
CADM3	9.78425
CNTN3	9.75735
NOVA2	9.74147
VIL1	9.74043
TIGAR	9.72601
ZMIZ1	9.71971
POLR2D	9.71907
OTC	9.71588
BTF3	9.69999
STARD10	9.67554
ELAVL4	9.66801
UBE2V1	9.66572
NOP9	9.66444
FIBP	9.66015
MECR	9.65864
WFIKKN2	9.65838
DPYSL5	9.65621
PLCG1	9.65192
KDM3B	9.65026
DHX16	9.63938
SCFD2	9.63678
CASC4	9.62489
KPNA1	9.60528
MGST1	9.60404
FAM136A	9.5794
PARN	9.57827
UBE2O	9.56624
NBEA	9.56053
DNTTIP1	9.55703
SI	9.54455
IGHV3-64	9.54011
ALDH3B1	9.52193
FABP2	9.52073
MRPL4	9.52026
FHIT	9.51685
BAG6	9.51622
NBN	9.50996
SYNPO	9.49416
EIPR1	9.49376
DHRS11	9.47375
PFDN2	9.44552
DNAJC10	9.4419
NUDCD2	9.4402
SMARCD1	9.43722
SNX6	9.42572
C17orf49	9.42497
IGKV3D-7	9.41969
RGL2	9.41519
PIK3R1	9.40908
FBXW9	9.40107
NAAA	9.38338
RNF2	9.37598
LRSAM1	9.37241
STK25	9.34589
MYRF	9.33904
SLC15A1	9.33854
DBT	9.3325
ABHD6	9.32704
SRSF12	9.32387
LUC7L2	9.31897
SPON2	9.30977
SPTLC2	9.28396
LMO7	9.28102
LSM3	9.27584
IGKV6D-41	9.26354
GOLPH3L	9.25903
CLPTM1L	9.24927
MRPL49	9.23711
IGKV6D-21	9.23555
ZC3HC1	9.23493
SETSIP	9.23362
LRRC40	9.23229
AKR7A3	9.22942
FXR2	9.22887
RBBP4	9.22338
RNASEH2A	9.21523
LARP4B	9.21341
ENTPD1	9.2067
PQBP1	9.20579
CIAO2B	9.18335
TMLHE	9.18286
WDR75	9.17007
IGHV4-39	9.16589
WDFY4	9.16414
CPSF2	9.1559
CASP6	9.1362
WDR3	9.12402
DDX47	9.11393
BTAF1	9.10753
ANP32D	9.10659
NADK2	9.0986
AGAP3	9.08343
MRTO4	9.07508
RANBP1	9.07334
G3BP2	9.07256
ND1	9.06854
CRTAP	9.06744
DDX5	9.06743
EMC8	9.0651
IKZF1	9.05803
IGKV2-30	9.05491
MB	9.01477
PCYT1B	9.01115
SMARCD2	9.0069
CUL1	9.00271
PDHA2	9.00072
ARHGEF17	8.99887
ERAP2	8.98712
RAB23	8.97425
PSME3IP1	8.97177
WDR44	8.96887
EXOSC10	8.94671
NUP188	8.94437
MPRIP	8.94187
DLG4	8.93837
BAZ1A	8.93521
U2AF2	8.93192
UBR5	8.88171
NCKIPSD	8.87586
MRPS7	8.8738
BAZ1B	8.87293
SASH3	8.87274
KHDRBS1	8.86392
NDRG2	8.85498
AHSP	8.8357
SH3GL1	8.83257
TPM4	8.83067
TMED9	8.82263
RAP2B	8.80778
GMDS	8.80241
EIF3H	8.80087
DMGDH	8.79072
RMC1	8.78567
DAP3	8.77435
HEATR5A	8.77421
RTCA	8.75654
CPD	8.7539
SPAG5	8.7285
TRIR	8.72493
SCAMP2	8.72331
PRKCI	8.72219
ARID1B	8.71845
PRAG1	8.7024
SNRPD2	8.7021
EIF2S2	8.69467
BCKDHB	8.69213
FCRL5	8.66944
DPM1	8.66843
CAMK1	8.66089
TLNRD1	8.66076
CMA1	8.65178
RPL23A	8.6438
DOCK9	8.64308
NAA11	8.63777
RRM1	8.62096
CD99	8.61947
ZMPSTE24	8.61229
FBLL1	8.61119
MRPS5	8.60243
SCLY	8.60101
COPG1	8.59656
CCDC51	8.59089
AGRN	8.58536
GRAP2	8.58507
CLTB	8.58281
ITPA	8.58195
AIP	8.57005
TDRD7	8.56618
CKMT2	8.5537
S100A14	8.54914
MRPL47	8.54492
KCNAB2	8.54334
COLGALT1	8.53727
NEDD1	8.53228
SRP19	8.5255
THOC3	8.52187
ROBO2	8.51925
ACSF3	8.51667
CTHRC1	8.51579
NFIC	8.50131
NCOA5	8.49431
MBOAT7	8.47888
TRIM5	8.4755
RASAL3	8.46597
LPCAT4	8.438
MTR	8.43517
MSL1	8.43388
SLC25A22	8.42928
BRD3	8.40834
CNTNAP1	8.39366
RBM5	8.38544
ARPC1A	8.38471
GSK3A	8.38465
EMG1	8.38315
GRN	8.38127
BICD2	8.37586
CSNK1D	8.37552
SEL1L	8.36509
CHKB	8.35125
GATD1	8.34669
VWA5A	8.34647
FMOD	8.34553
MAPT	8.34064
GALM	8.32847
ZC3HAV1L	8.32727
BZW1	8.32567
TRIM26	8.32562
MCCC1	8.3095
RAB34	8.30134
SNX5	8.29235
FSTL3	8.2574
GPRC5B	8.25594
UQCC3	8.25101
FAM98A	8.2485
NAT1	8.24774
MYL6	8.24142
AIFM2	8.23743
TRIM29	8.22678
CNTN4	8.22418
TBCE	8.21617
DLG3	8.21337
GID8	8.21317
UBE4A	8.20979
CHD1	8.2093
CHD5	8.20917
SEMA3B	8.20419
DLST	8.18669
FOLH1B	8.1824
ALDH1L2	8.17789
SPCS2	8.15397
RAP2C	8.14539
F8	8.1414
DSTN	8.13314
UBQLN4	8.1301
TRMT61A	8.11164
SUGCT	8.11109
TOX2	8.1109
CEP63	8.10631
NFKB1	8.10577
HDAC1	8.09902
WNK1	8.09557
ZFP36L1	8.08638
NDUFA12	8.075
VCPIP1	8.07041
CTNNA2	8.06865
IRF2BP1	8.05553
TBK1	8.04223
PNPLA6	8.0303
HIP1R	8.00844
CELA3B	8.00688
TBC1D15	7.98056
COX4I1	7.9788
ARSL	7.97352
GLRX	7.9672
CLTCL1	7.96062
IGLV1-51	7.95404
RNF20	7.94817
SFTPA1	7.94673
SFTPA2	7.94673
GNL3	7.9448
MXRA8	7.93093
MRPS10	7.9135
FCHO2	7.91125
CMAS	7.90716
MVB12A	7.90063
PLXND1	7.89808
S100A13	7.88737
TST	7.86099
AACS	7.8554
CHMP1B	7.84425
ITPRID2	7.84059
C7orf26	7.84057
ABCB8	7.82646
SLC5A2	7.81239
ECSCR	7.80173
TRMT5	7.80117
IGHV7-4-1	7.79967
EIF3M	7.79092
NRDC	7.78691
KANK1	7.78254
C2CD2L	7.77872
RCSD1	7.77724
RIF1	7.77534
STAT5A	7.77391
PDK2	7.77166
STAM2	7.76109
NQO2	7.74865
SNX2	7.74724
GSTK1	7.74459
FLT1	7.73621
CHD2	7.71651
PPIF	7.71525
UBE2K	7.71433
PDS5B	7.70953
PLXDC1	7.70365
CRELD1	7.69903
POLD1	7.69821
ELAC2	7.69736
LARS2	7.67085
SMIM1	7.67082
FKBP15	7.66743
GIMAP4	7.66561
PPP6C	7.64431
RPL31	7.63752
PACSIN3	7.63212
RABGEF1	7.61641
SYNJ1	7.61596
PI4K2A	7.61563
IGKV1-16	7.61386
PRPF3	7.60168
TCN1	7.58524
PPWD1	7.58374
CDH11	7.58335
RAB15	7.57726
BMS1	7.5772
IDE	7.56968
DDC	7.56645
FIP1L1	7.56414
CAV1	7.56087
CCDC124	7.55654
EPM2AIP1	7.51703
CD177	7.51349
PSAT1	7.50305
VSNL1	7.50254
CDS2	7.49745
MIA2	7.49522
TACC1	7.49253
SCRN2	7.49215
LNPK	7.49214
ELAVL1	7.49032
ST13P5	7.49005
NNMT	7.48323
MFN2	7.48091
HYPK	7.47889
SCCPDH	7.45442
RBFOX1	7.45378
STX18	7.43001
S100A7	7.42082
RBFOX2	7.3893
PPP2R2B	7.38418
NOP2	7.38136
ARFGAP1	7.3793
EHBP1L1	7.3763
SGSH	7.37356
P4HA2	7.37065
ARHGEF40	7.36761
SRSF8	7.32966
AMPD2	7.32908
USP24	7.31969
PRPF31	7.3194
WASHC2C	7.30511
PSMA2	7.29918
RENBP	7.28887
SLAIN2	7.28337
GSTT1	7.27868
SSC5D	7.26497
PDXP	7.2612
NT5C3A	7.25855
UFD1	7.2548
UBQLN1	7.24358
CEP170B	7.22562
S100A6	7.22491
HDDC2	7.22468
ECI2	7.22369
ABHD10	7.22038
IK	7.21755
UGT1A7	7.20573
TUBG2	7.18926
QSOX2	7.17819
STK10	7.14114
IGLV2-18	7.13868
LILRA3	7.13483
MYBBP1A	7.13463
MADD	7.13334
WASHC2A	7.13138
ARIH1	7.131
NTM	7.13081
UPF2	7.11699
CMPK2	7.10813
WWC2	7.10305
AK3	7.1018
NAPSA	7.09943
DTNA	7.09912
MSH6	7.09744
PDE4DIP	7.09172
ELMO1	7.07614
ARPC3	7.07465
DEK	7.06641
MARCHF5	7.06425
CTNNA1	7.06411
IGHV4-28	7.05384
RPL35A	7.049
SRRM1	7.04344
NDUFV2	7.0415
KPNA5	7.03573
MRPS28	7.03384
RGN	7.01125
FLII	7.00712
EDF1	6.99867
CUX1	6.99623
POR	6.99612
ASH2L	6.9928
NEK9	6.99232
ATP2B2	6.98846
NIPSNAP1	6.9682
PPFIBP2	6.96324
MUC4	6.96132
KRAS	6.94714
CRABP2	6.94515
ST6GALNAC1	6.9413
TOM1L2	6.93636
SIN3A	6.93392
UBASH3B	6.91715
SERPINB8	6.91471
MTIF2	6.91465
HNF1B	6.9099
PRSS8	6.90355
SYNE3	6.90301
STUB1	6.89832
MAP6	6.89557
ACP2	6.87599
ZNF512	6.87312
PTK2	6.86994
NCK1	6.86872
COPS7A	6.86676
PRKD2	6.86055
NME3	6.86005
SAMM50	6.85027
UQCRH	6.84845
EPDR1	6.84765
PAPOLA	6.84359
AAAS	6.8426
TKFC	6.83306
MORF4L1	6.831
ARAP1	6.82969
PRXL2A	6.82343
SDF2	6.8232
SPINT1	6.81411
SGTA	6.80392
TWF2	6.80318
EFEMP2	6.80116
BST2	6.79563
ATL1	6.79475
EIF1	6.79355
EIF1B	6.79355
NUP62	6.79341
OTULINL	6.77975
ACTL6A	6.77879
ETF1	6.77805
TOP1	6.77716
LLGL1	6.76168
PRUNE1	6.75757
PPM1B	6.74245
UCHL1	6.73853
SRSF1	6.72538
PCYT2	6.712
NUDT16L1	6.70982
PDCD11	6.70939
EIF2D	6.70922
TM9SF4	6.70379
GP2	6.69872
DNAJB4	6.68995
NUP88	6.6881
RNH1	6.68439
TATDN1	6.67913
LAMC3	6.67844
DAXX	6.67464
ARHGAP35	6.66211
CHI3L2	6.66113
CDKAL1	6.65414
CSNK1E	6.64371
RPL13AP3	6.64282
LYAR	6.64182
CDC5L	6.63719
C1orf116	6.62503
RABEP1	6.62127
MX2	6.59168
EPHA1	6.58926
VRK1	6.58173
SRL	6.57293
ARHGAP5	6.57122
MTARC1	6.56821
SBF1	6.56667
STAG1	6.56512
WDR37	6.55553
PRKCD	6.55359
CTPS1	6.5518
CDKN2AIP	6.55083
POLR2C	6.54478
WAPL	6.54476
BCL2	6.54453
GON7	6.533
KPNA3	6.53295
LAMTOR1	6.52267
ADAR	6.51806
TJP3	6.51774
GMPPA	6.50857
UGT1A6	6.50754
C7orf50	6.5042
CC2D1A	6.50362
HDHD5	6.49029
LEPR	6.48804
RMDN3	6.47881
MCM2	6.45916
FCGR2C	6.45841
IGFBP7	6.45621
OGFR	6.45528
JPT2	6.44995
PEAK1	6.44965
PLOD1	6.44556
HINT2	6.44382
PPP3CA	6.42982
SLC12A5	6.42507
AGMAT	6.42342
SEC11A	6.41715
GSDME	6.41146
DDX58	6.40514
CDC42	6.40054
PIK3C3	6.39856
RAD23A	6.39267
ST13	6.3915
SEPTIN8	6.39135
SURF4	6.38918
HGH1	6.38714
MAP2K4	6.38059
MARK3	6.36998
LUC7L3	6.36361
OLA1	6.35994
PPP1R14A	6.35926
SNX27	6.35866
TUT1	6.3555
PBDC1	6.35372
NDUFB9	6.33973
PIPOX	6.33433
WDR7	6.33277
PPIL1	6.31583
TBC1D20	6.30819
PPP6R2	6.30742
PHF6	6.30651
RAB11B	6.30424
ZFR	6.30226
DHODH	6.30168
DNAJB1	6.28956
SLC9A3R1	6.28029
PPP6R1	6.27501
NNT	6.26774
CLPB	6.26397
ERLIN2	6.2584
CXADR	6.24972
IDH3G	6.23678
SERPINI2	6.23373
P2RX4	6.23055
LTBP2	6.22806
PTPRA	6.22725
DMXL1	6.22029
GOLGA3	6.21994
BPIFB1	6.21871
RPL9	6.20726
ARHGEF10	6.20682
TBC1D2B	6.20546
GIT2	6.20106
MRPS36	6.20087
HSPA12A	6.19907
HSD17B10	6.19702
SHC1	6.18938
AP5B1	6.18713
USP9Y	6.18511
BPTF	6.17913
NF1	6.17585
RAB11A	6.16976
RO60	6.1644
GABBR1	6.15937
COL1A2	6.15796
DOP1B	6.15702
DDX52	6.15448
MCM3	6.14992
AGR2	6.14312
PADI4	6.14307
HDGFL2	6.14019
AGPAT3	6.12307
RPS26P11	6.10919
HLA-DRB5	6.09539
CROCC	6.09444
DNAJA3	6.09387
DDX3Y	6.0917
GNPDA2	6.08805
TRAPPC4	6.07952
RAB3GAP2	6.07909
HEBP1	6.07359
FABP6	6.07003
UGGT2	6.06724
CDC37	6.03404
SSBP1	6.03288
SMARCAD1	6.02532
PDIA2	6.02476
EFHD1	6.02081
FYCO1	6.02038
LIPA	6.01998
RBM4	6.01964
IKBKB	6.01771
L3HYPDH	6.01613
CNNM3	6.01346
MMP1	6.00645
NUTF2	6.00345
PITPNA	6.00188
SORD	6.00153
VPS53	5.99086
IGKV3-7	5.98763
LSM7	5.98455
A2ML1	5.98007
SRCIN1	5.97898
DDX1	5.97567
AIG1	5.97244
PSMB6	5.97169
ATP5PB	5.97052
C4orf33	5.96603
LIG4	5.96527
AAGAB	5.96342
PYGM	5.95382
GALNT2	5.94953
NEFH	5.94922
CA9	5.94478
BAX	5.93052
IGKV1D-16	5.92943
CPNE2	5.92905
CLDN3	5.92701
ODR4	5.92661
RPL17	5.92504
ACP5	5.9233
CSRP1	5.92213
TCIRG1	5.91861
PPP2R1A	5.90744
SEC23IP	5.90356
VPS25	5.9015
MAPRE2	5.8838
SEC24B	5.88297
TSC2	5.8824
UBFD1	5.88114
CCT7	5.88008
RPS17	5.87778
PSMB4	5.87306
MAP2K6	5.87306
ISOC2	5.86977
DNAJA2	5.86785
ABCA8	5.8627
FABP1	5.8591
DNAJC9	5.85686
VAPB	5.85391
LLGL2	5.85277
TTC1	5.84
RBM4B	5.83957
ZC3H14	5.83558
ATXN2L	5.83433
GGTLC3	5.83042
NEFL	5.81907
CHMP2A	5.81199
COL15A1	5.81085
HBB	5.81013
MEMO1	5.79241
PABPC1L	5.79205
PPT1	5.79144
MEAK7	5.78892
CUL4B	5.78891
NDRG1	5.78829
LRP6	5.78668
SH3GLB1	5.78317
AHCYL2	5.78112
SYK	5.78042
THUMPD3	5.77652
TMBIM6	5.77361
PRMT5	5.77225
LOX	5.76691
ELOB	5.7665
HYI	5.76564
ARHGAP27	5.76499
NPRL3	5.76447
UTY	5.7604
KDM6A	5.75463
CNN1	5.7528
FLG	5.7498
DEGS1	5.74892
SDF4	5.74467
RNASE2	5.74128
SPECC1L	5.74036
TNIK	5.73582
MAP2K7	5.73476
SUCLA2	5.73407
DDX46	5.73363
HMOX2	5.7292
PPP6R3	5.72869
SAA2	5.72705
API5	5.72397
FHOD1	5.72168
PUDP	5.72103
PEF1	5.71386
DYNLL1	5.7106
TRPV2	5.71021
VPS52	5.70221
YBX3	5.69416
TAF5L	5.68922
IYD	5.68826
RAPGEF2	5.68581
STIM1	5.67708
VPS36	5.67148
SCO1	5.67079
USP4	5.66669
WDR11	5.66524
RAB14	5.65885
PRSS57	5.65308
CKAP4	5.64083
FAM171A1	5.63767
SLC44A1	5.61888
RBM47	5.61731
OXNAD1	5.61639
TBCC	5.616
SMPD4	5.61481
LILRB5	5.61438
WDR61	5.61348
ATP6V1A	5.6134
KRT33B	5.61114
ADH4	5.611
THY1	5.60854
PARP10	5.58604
IGHV1-46	5.58441
TCAF1	5.57995
KPNA4	5.57665
PARVB	5.57653
CTSZ	5.57521
CAMSAP3	5.56873
NEGR1	5.55966
AADAC	5.55671
KRT31	5.55218
RBM26	5.54571
NCDN	5.54539
NUMB	5.54484
MRI1	5.53621
JAML	5.5268
RIN1	5.52558
STXBP1	5.52092
PDE8A	5.51999
SRRT	5.51992
COPS2	5.51883
GNG12	5.51823
DENND2D	5.50913
DFFA	5.50846
PYM1	5.50749
VPS26A	5.50437
TLE2	5.49053
S100A7A	5.48716
SIX5	5.48348
ACSM5	5.48332
SDC4	5.48229
ATXN10	5.48054
CDK1	5.4765
PDGFRB	5.46579
TTC12	5.46299
PRNP	5.46289
TMEM43	5.4588
IGHV5-10-1	5.45775
DPYD	5.45698
TBL1XR1	5.45668
DOCK1	5.4503
RPLP1	5.44906
NUP54	5.44887
OGDHL	5.44387
MRPL13	5.44331
PCBD1	5.44018
GAP43	5.44018
HBA1	5.43195
NAGA	5.42107
TMOD3	5.42056
COMMD1	5.418
PHKB	5.41151
TXLNA	5.40622
ARHGEF7	5.40617
RPS4X	5.40596
TLE1	5.40387
TOX3	5.40213
RAVER1	5.39827
MYDGF	5.39762
LAIR1	5.39248
ASS1	5.38928
IGHV1-3	5.38053
GNPTG	5.37792
ACOT2	5.3776
HGS	5.37702
RAB13	5.37604
NECAP2	5.36732
SLC12A7	5.36639
COPB1	5.365
C11orf54	5.36393
TLE4	5.3623
SBSN	5.36193
ARHGEF6	5.3613
ARHGEF1	5.35966
RPL18A	5.35477
PDK1	5.34999
EIF2B4	5.34773
IGHV2-70D	5.3447
LSM2	5.34374
MPST	5.34115
SF3B1	5.33397
HSBP1	5.32892
DCTN4	5.32787
AKT1	5.31623
RPLP0P6	5.31297
NFXL1	5.30109
PGRMC2	5.29087
MALT1	5.28947
TRIP10	5.2886
CUZD1	5.28806
TRAPPC8	5.28141
SDF2L1	5.2778
SUSD2	5.2744
RMDN1	5.27297
DNAJC11	5.26912
PDP1	5.26883
SRM	5.26489
SNAP25	5.26372
KLC2	5.2615
GNB3	5.2598
DECR2	5.25547
ECHDC3	5.25495
HSD17B11	5.25161
CPSF4	5.25071
PBXIP1	5.24923
UBQLN2	5.24727
NFATC2	5.24513
AP1G1	5.24493
DCXR	5.24486
SRSF3	5.24373
HIGD1A	5.24057
AK2	5.23887
ACTR3C	5.2377
ATG4B	5.21998
LPP	5.21867
PAPPA2	5.20862
THOP1	5.20796
GNA15	5.20318
EIF2S1	5.20314
SAA1	5.20172
KIF1A	5.19742
CYP20A1	5.19548
TRIM22	5.19437
ACOT1	5.19205
KYNU	5.19081
PAWR	5.1899
MARCKSL1	5.1891
FANCI	5.17537
HSD17B12	5.17309
MROH1	5.17192
USP9X	5.17041
UROD	5.16778
ESAM	5.16404
ATP13A2	5.16158
TMX3	5.15716
MORF4L2	5.15653
PRDX3	5.15599
LONP1	5.15485
ATG3	5.14927
GGCX	5.14447
SERPINA11	5.14434
RPS12	5.14283
TREML1	5.14065
ATP5F1C	5.13
DCAF7	5.12599
DDAH1	5.12489
TMEM201	5.12377
GMIP	5.11962
LMNB1	5.11741
MGP	5.11567
SEPTIN6	5.10741
SEPTIN1	5.10686
RRM2	5.10202
EIF3J	5.09593
TOMM40	5.09261
CFAP410	5.08791
TOX4	5.08701
SRSF10	5.08531
GMEB2	5.08475
G3BP1	5.07786
GLUL	5.07773
PPFIBP1	5.07284
S100A8	5.0716
P4HA1	5.06998
ATP6V1D	5.06525
TMEM198	5.06519
DICER1	5.06429
TWF1	5.0603
KRT87P	5.05746
DDX6	5.05744
SON	5.05701
ADAP1	5.05356
ADAMDEC1	5.05088
PRPS1L1	5.04735
PDCL3	5.04462
NSUN2	5.04365
TUBGCP2	5.04012
RNASEL	5.04012
NDUFS4	5.03896
RPS7	5.03836
PRRC2A	5.03607
SF1	5.0357
NDUFA8	5.03108
HID1	5.03081
IGHV5-51	5.02774
EML4	5.02719
SCG2	5.02633
PNLIPRP2	5.02285
TAOK2	5.02043
AKT2	5.01559
LSG1	5.0024
CSRP2	4.99655
MRPS27	4.99526
DDX21	4.99408
H3-3A	4.97867
KPNA2	4.97811
SSR4	4.97583
SH3BGRL	4.97122
PTGR2	4.96838
HDLBP	4.96231
SEC24D	4.95931
RAB8B	4.95876
RPL4	4.95368
BYSL	4.95021
SAR1B	4.94518
PHF21A	4.94481
PCNP	4.94415
GNAL	4.94401
CCT6B	4.94351
HMGN4	4.93581
SMU1	4.92499
HNRNPUL2	4.92481
HEXB	4.92443
ATP6V1C1	4.91842
COL8A1	4.90878
RAB2B	4.90759
SUN2	4.90474
RBM42	4.89897
LAMTOR2	4.89561
BMP1	4.89475
BCKDHA	4.8946
GLT8D1	4.89421
ACADVL	4.89216
EPHB3	4.88785
COL4A1	4.88368
FARSA	4.88321
PEX19	4.88247
MRPL24	4.87556
FBXO22	4.86954
RRM2B	4.85868
HDGFL3	4.85341
ST13P4	4.85103
ATP5ME	4.85038
NUDT6	4.84726
TUBB	4.83674
LTA4H	4.83604
IPO11	4.83526
PIEZO1	4.8341
NT5DC1	4.8322
EXOC2	4.82831
ITGAX	4.82125
KPNA6	4.81837
GPD1L	4.81824
BLVRA	4.81783
PAK2	4.81706
PSMA7	4.81331
HBE1	4.81176
CADM4	4.80883
LAMTOR3	4.80876
RPL21	4.8086
CRKL	4.80252
PDXDC1	4.79777
GAPVD1	4.79485
LYRM4	4.79217
SLMAP	4.79212
SLC39A7	4.78781
FGFR1OP	4.7835
DMTN	4.77707
MGAM	4.77355
COX5A	4.76976
RSU1	4.76727
MRC2	4.76453
HNRNPU	4.76295
PCYT1A	4.75989
PURA	4.75594
STX7	4.7537
SPG7	4.75191
TRIM21	4.74984
RPS26	4.74923
PHKG2	4.74745
NCKAP1L	4.74658
STBD1	4.74463
DRG2	4.74338
COL18A1	4.74087
PSMA4	4.73907
APAF1	4.73827
NBAS	4.73477
SESTD1	4.73345
KRT85	4.73055
PLEKHA5	4.72656
CWF19L1	4.72454
INTS2	4.72232
ART3	4.71846
RDX	4.71751
RAB32	4.71454
DPYS	4.71031
SORBS3	4.70955
SEC23B	4.70733
STAT2	4.69545
CPVL	4.69478
HINT1	4.69447
SEC13	4.68945
MAP2	4.68288
COPZ1	4.68173
COPE	4.67813
ARHGEF16	4.67767
PAF1	4.67352
SUPT6H	4.67256
CHAD	4.66748
PSMD8	4.65833
NDUFS8	4.65643
CPSF3	4.65628
GUCY1A2	4.65214
ADD2	4.65077
NPLOC4	4.64856
RABGAP1	4.64464
MYH10	4.64432
EXD2	4.63946
APPL1	4.63897
KARS1	4.63477
DERL1	4.63297
CLTA	4.61994
HNRNPCL1	4.61595
HNRNPCL2	4.61573
LMCD1	4.61551
GPM6B	4.6122
ANXA5	4.61198
MARK2	4.60853
GRIPAP1	4.60739
PTPRZ1	4.60715
LPCAT1	4.60589
TOP2B	4.60356
GNA11	4.60053
LSM8	4.59645
HSP90AA5P	4.59616
LIMS1	4.59035
UBA7	4.58747
INPP5D	4.58739
UBE2M	4.58485
MTAP	4.58315
MGAT1	4.58279
ARL1	4.58238
IGBP1	4.58094
OSBPL8	4.57919
PRDX5	4.57803
OPCML	4.57153
ART4	4.5655
ARHGEF10L	4.5635
OSMR	4.55887
ABCD2	4.55821
TOR1AIP1	4.5561
NBEAL2	4.5527
RRAD	4.55079
DMKN	4.54872
ABLIM1	4.54356
NOTCH3	4.54061
MYL2	4.53895
ADSS2	4.538
PLCD1	4.53425
CHMP7	4.52579
ANP32B	4.52366
HNRNPCL3	4.52305
HNRNPCL4	4.52305
MYOC	4.51444
CSF1	4.51441
ABCC1	4.51236
CLEC11A	4.50767
AK5	4.50735
SYBU	4.50695
GARS1	4.50644
HES7	4.50168
NHLRC3	4.49942
SMARCA5	4.49676
PTGES3	4.49282
MORC2	4.49124
RPLP0	4.49004
EIF4E	4.48578
TM9SF2	4.47597
HAAO	4.47563
AGA	4.4737
FBL	4.47281
DMBT1	4.47268
RBM8A	4.46967
FAM241B	4.46435
VDAC1	4.46409
LGMN	4.46234
PRKAA2	4.46012
ANTXR2	4.45208
DUT	4.45175
RTN1	4.45092
TCERG1	4.45058
PITHD1	4.44879
WBP11	4.44831
HPGD	4.44553
GAPDHS	4.44459
MED1	4.43945
CEP350	4.43909
HNRNPH1	4.4339
UGGT1	4.43338
PSMD1	4.43114
RRP12	4.42818
RHOC	4.42643
POP1	4.42225
INPP5F	4.41864
CPNE7	4.41736
RAD50	4.41678
GSTM1	4.41414
GRB2	4.41292
HDGF	4.40512
PSME4	4.40164
SCD	4.40156
NECTIN3	4.39616
RCC1	4.39493
UEVLD	4.39467
CAND2	4.39192
EBI3	4.39092
ALDH1B1	4.3903
LRRC15	4.38221
VWA1	4.37941
ASPSCR1	4.37787
CDIPT	4.37488
DPY19L3	4.36885
UBE3C	4.36762
FUT3	4.36334
EGFR	4.35898
FNDC3A	4.35211
CUBN	4.3502
FUT5	4.35011
EIF3G	4.34719
HNRNPA1L2	4.34701
GNS	4.34609
CHDH	4.34595
ALG2	4.34424
SLC35B2	4.34408
SAP18	4.34339
PARP4	4.34072
TP53I11	4.34021
TMEM214	4.33532
ECHDC1	4.33531
DHTKD1	4.33449
MCM7	4.33296
LYPLA2	4.32905
LYPLA1	4.32884
CTNND1	4.32846
TRMT10C	4.32812
AP2M1	4.32667
RECQL	4.32667
GSTM4	4.32251
STRN3	4.32073
DNAJB11	4.3206
IFI30	4.3168
MAT2A	4.31603
DCLK1	4.31439
JAM2	4.30706
PSMA8	4.3067
IFT27	4.30583
NCAM2	4.30568
KRT83	4.30426
THOC2	4.30158
HCFC1	4.30107
SULT1A2	4.3007
MRPS26	4.30059
FUT6	4.29881
CDC42BPB	4.29736
RHOT2	4.29651
GUK1	4.29506
GBP1	4.29459
ITGA7	4.29426
EIF3D	4.29073
CGNL1	4.29034
INSR	4.28832
MARS1	4.28825
TUBB4B	4.28791
VPS26B	4.28624
CPNE4	4.28506
INPP1	4.28217
BCS1L	4.282
HEATR5B	4.27989
IGHD	4.27933
NXN	4.27749
HARS2	4.27334
SEC61A2	4.26962
INPPL1	4.26874
NUDCD3	4.26702
RPL12	4.2652
PRKCB	4.26288
ERMP1	4.26049
RELA	4.25898
NECTIN2	4.25394
ANKFY1	4.25124
SUPT16H	4.25053
TG	4.24674
PABPC4	4.24392
LIMCH1	4.24374
EEF1E1	4.24165
GBA2	4.239
PLCB2	4.23561
COL6A2	4.23499
VPS35L	4.23488
PTER	4.2318
ATP6V1H	4.23176
RAB6C	4.23128
RAB11FIP2	4.21898
TIAL1	4.2156
ERO1A	4.21549
APLP1	4.21514
TBXAS1	4.21405
RAB39A	4.20926
CHM	4.20851
EFNB1	4.20843
TREH	4.20702
STXBP2	4.20656
TIA1	4.20258
SMAP2	4.20212
RUFY1	4.20019
SULT1A3	4.20006
SULT1A4	4.20006
INTS4	4.19987
OSBP	4.19922
PC	4.19886
GBA	4.19816
AGTRAP	4.19772
PRIM2	4.1963
SULT1B1	4.19539
MRPL50	4.1942
LPCAT3	4.19256
DNAJA1	4.19247
GSDMD	4.19165
PRSS29P	4.19138
RAP2A	4.18987
DCAF1	4.18891
CELA3A	4.18847
HSPB6	4.18641
LILRB3	4.18373
GGTLC2	4.18158
FMNL1	4.17789
NUP210	4.17399
PTMS	4.17293
MRPL48	4.17243
S100A11	4.16669
MRPL38	4.166
USP10	4.1658
TBCB	4.1586
LYPLAL1	4.15283
MMP19	4.15058
PCSK1N	4.15004
FBXO6	4.14975
LTBP4	4.14969
EIF3B	4.14795
TCF25	4.14701
ITPR1	4.14577
EXOC6B	4.14565
MORC1	4.14384
PRRC2C	4.13876
CD9	4.1382
ECSIT	4.13578
COA7	4.13428
AKR1B10	4.13393
PTK7	4.13211
HIRIP3	4.13172
GNE	4.12873
HLA-F	4.12828
C1QBP	4.1251
TFG	4.12487
L2HGDH	4.12403
AP3M1	4.12008
SNRPA	4.11936
EXOC4	4.11934
CSNK1A1L	4.1159
ALDH5A1	4.11473
TUBGCP3	4.10774
ENPP4	4.10396
TES	4.09956
FKBP2	4.09932
ACAA1	4.0989
HTRA1	4.09694
FCSK	4.09541
OTUD7B	4.09516
GTPBP4	4.09421
STX12	4.09329
HNRNPR	4.08977
THBS3	4.08272
LRRC8A	4.08203
UBAP2L	4.07718
TMED7	4.07545
PPP1R9B	4.07488
MBP	4.07383
G6PD	4.07285
RPL26L1	4.06742
AGR3	4.06514
PM20D1	4.06478
WASH4P	4.05166
IFI16	4.05088
ANP32C	4.05027
TOMM34	4.04982
CIAO2A	4.04917
FGL2	4.04728
RANBP6	4.04677
PRMT1	4.04592
BCAN	4.0453
RPS23	4.045
OXSR1	4.04339
VAV1	4.04338
PSMF1	4.0426
STX16	4.04191
PPME1	4.04147
GPC1	4.04065
ENG	4.03696
MYO5A	4.03286
TIE1	4.02696
UNC13D	4.02672
MIPEP	4.02549
CAMK2A	4.02489
BAALC	4.02386
SRSF9	4.02277
GLRX3	4.02165
CCT3	4.02089
RPL34	4.02055
BAG3	4.02022
GPD2	4.01732
ORMDL1	4.01664
PDE5A	4.01623
BLK	4.01508
ACSL4	4.01266
SNCA	4.01228
PSMB7	4.01143
GBP6	4.01111
TM9SF3	4.01002
STRIP1	4.00562
GPT	4.00485
RAB18	4.00226
MAP1S	4.00146
SRPRA	4.00103
DARS1	3.99826
QPRT	3.99427
SRSF5	3.99296
TRAPPC6B	3.98825
PLEKHO2	3.98752
LGALS9	3.98541
RTN4R	3.98471
GSPT2	3.9822
C11orf58	3.97553
PRDX4	3.97506
[truncated: 1,001 more rows]

## Sheet: NMF_Cluster
Exp_ID	NMF_cluster
Exp079160	Gastrointestinal-rich
Exp087390	Gastrointestinal-rich
Exp087406	Gastrointestinal-rich
Exp079138	Gastrointestinal-rich
Exp079280	Gastrointestinal-rich
Exp082754	Gastrointestinal-rich
Exp082767	Gastrointestinal-rich
Exp082780	Gastrointestinal-rich
Exp082782	Gastrointestinal-rich
Exp082790	Gastrointestinal-rich
Exp082807	Gastrointestinal-rich
Exp082827	Gastrointestinal-rich
Exp082844	Gastrointestinal-rich
Exp082846	Gastrointestinal-rich
Exp087320	Gastrointestinal-rich
Exp079214	Gastrointestinal-rich
Exp079228	Gastrointestinal-rich
Exp079297	Gastrointestinal-rich
Exp081475	Gastrointestinal-rich
Exp081487	Gastrointestinal-rich
Exp081600	Gastrointestinal-rich
Exp082955	Gastrointestinal-rich
Exp082971	Gastrointestinal-rich
Exp087343	Gastrointestinal-rich
Exp081483	Gastrointestinal-rich
Exp079204	Gastrointestinal-rich
Exp079252	Gastrointestinal-rich
Exp079285	Gastrointestinal-rich
Exp081480	Gastrointestinal-rich
Exp081572	Gastrointestinal-rich
Exp081577	Gastrointestinal-rich
Exp082998	Gastrointestinal-rich
Exp079190	Gastrointestinal-rich
Exp079279	Gastrointestinal-rich
Exp079300	Gastrointestinal-rich
Exp081500	Gastrointestinal-rich
Exp081517	Gastrointestinal-rich
Exp081539	Gastrointestinal-rich
Exp081550	Gastrointestinal-rich
Exp081560	Gastrointestinal-rich
Exp081561	Gastrointestinal-rich
Exp082930	Gastrointestinal-rich
Exp082939	Gastrointestinal-rich
Exp087298	Gastrointestinal-rich
Exp087300	Gastrointestinal-rich
Exp078927	Gastrointestinal-rich
Exp078931	Gastrointestinal-rich
Exp078935	Gastrointestinal-rich
Exp078949	Gastrointestinal-rich
Exp078952	Gastrointestinal-rich
Exp078964	Gastrointestinal-rich
Exp078967	Gastrointestinal-rich
Exp078970	Gastrointestinal-rich
Exp078972	Gastrointestinal-rich
Exp078974	Gastrointestinal-rich
Exp078975	Gastrointestinal-rich
Exp078978	Gastrointestinal-rich
Exp078982	Gastrointestinal-rich
Exp078984	Gastrointestinal-rich
Exp078991	Gastrointestinal-rich
Exp079005	Gastrointestinal-rich
Exp079029	Gastrointestinal-rich
Exp079057	Gastrointestinal-rich
Exp079067	Gastrointestinal-rich
Exp079078	Gastrointestinal-rich
Exp079101	Gastrointestinal-rich
Exp079126	Gastrointestinal-rich
Exp083954	Gastrointestinal-rich
Exp083978	Gastrointestinal-rich
Exp079257	Gastrointestinal-rich
Exp083952	Gastrointestinal-rich
Exp079167	Gastrointestinal-rich
Exp079164	Gastrointestinal-rich
Exp079173	Gastrointestinal-rich
Exp079267	Gastrointestinal-rich
Exp079281	Gastrointestinal-rich
Exp079291	Gastrointestinal-rich
Exp079302	Gastrointestinal-rich
Exp079240	Gastrointestinal-rich
Exp083976	Gastrointestinal-rich
Exp087339	Gastrointestinal-rich
Exp083968	Gastrointestinal-rich
Exp079200	Gastrointestinal-rich
Exp087312	Gastrointestinal-rich
Exp083008	Gastrointestinal-rich
Exp083957	Gastrointestinal-rich
Exp083963	Gastrointestinal-rich
Exp087354	Gastrointestinal-rich
Exp087355	Gastrointestinal-rich
Exp087428	Gastrointestinal-rich
Exp087446	Gastrointestinal-rich
Exp074385	Gastrointestinal-rich
Exp081629	Gastrointestinal-rich
Exp081677	Gastrointestinal-rich
Exp082718	Gastrointestinal-rich
Exp082740	Gastrointestinal-rich
Exp081604	BRO-rich
Exp081605	BRO-rich
Exp081614	BRO-rich
Exp087306	BRO-rich
Exp087307	BRO-rich
Exp087318	BRO-rich
Exp087461	BRO-rich
Exp087333	BRO-rich
Exp087367	BRO-rich
Exp087368	BRO-rich
Exp087371	BRO-rich
Exp087372	BRO-rich
Exp087373	BRO-rich
Exp087374	BRO-rich
Exp087375	BRO-rich
Exp087377	BRO-rich
Exp087378	BRO-rich
Exp087381	BRO-rich
Exp087384	BRO-rich
Exp087385	BRO-rich
Exp087386	BRO-rich
Exp087389	BRO-rich
Exp087391	BRO-rich
Exp087393	BRO-rich
Exp087397	BRO-rich
Exp087400	BRO-rich
Exp087401	BRO-rich
Exp087402	BRO-rich
Exp087405	BRO-rich
Exp087408	BRO-rich
Exp087409	BRO-rich
Exp087410	BRO-rich
Exp087411	BRO-rich
Exp087412	BRO-rich
Exp087414	BRO-rich
Exp079171	BRO-rich
Exp079269	BRO-rich
Exp079271	BRO-rich
Exp079278	BRO-rich
Exp081466	BRO-rich
Exp081608	BRO-rich
Exp082988	BRO-rich
Exp082990	BRO-rich
Exp082992	BRO-rich
Exp083917	BRO-rich
Exp087309	BRO-rich
Exp075580	BRO-rich
Exp075581	BRO-rich
Exp075584	BRO-rich
Exp075585	BRO-rich
Exp075588	BRO-rich
Exp075589	BRO-rich
Exp079146	BRO-rich
Exp079148	BRO-rich
Exp079170	BRO-rich
Exp079286	BRO-rich
Exp081460	BRO-rich
Exp081465	BRO-rich
Exp081468	BRO-rich
Exp081474	BRO-rich
Exp081479	BRO-rich
Exp081590	BRO-rich
Exp081591	BRO-rich
Exp082929	BRO-rich
Exp082934	BRO-rich
Exp082978	BRO-rich
Exp083924	BRO-rich
Exp083941	BRO-rich
Exp083942	BRO-rich
Exp083943	BRO-rich
Exp083947	BRO-rich
Exp083959	BRO-rich
Exp087332	BRO-rich
Exp087334	BRO-rich
Exp087352	BRO-rich
Exp087361	BRO-rich
Exp087416	BRO-rich
Exp087425	BRO-rich
Exp087436	BRO-rich
Exp087442	BRO-rich
Exp087462	BRO-rich
Exp079141	BRO-rich
Exp079185	BRO-rich
Exp081587	BRO-rich
Exp082964	BRO-rich
Exp087448	BRO-rich
Exp087457	BRO-rich
Exp087459	BRO-rich
Exp079191	BRO-rich
Exp079230	BRO-rich
Exp079233	BRO-rich
Exp079263	BRO-rich
Exp079266	BRO-rich
Exp079289	BRO-rich
Exp081463	BRO-rich
Exp081471	BRO-rich
Exp081476	BRO-rich
Exp081492	BRO-rich
Exp081575	BRO-rich
Exp081576	BRO-rich
Exp082986	BRO-rich
Exp083933	BRO-rich
Exp087324	BRO-rich
Exp087337	BRO-rich
Exp087450	BRO-rich
Exp072643	BRO-rich
Exp075582	BRO-rich
Exp075587	BRO-rich
Exp075592	BRO-rich
Exp079140	BRO-rich
Exp079149	BRO-rich
Exp079241	BRO-rich
Exp079243	BRO-rich
Exp081461	BRO-rich
Exp081477	BRO-rich
Exp081482	BRO-rich
Exp081488	BRO-rich
Exp081491	BRO-rich
Exp081571	BRO-rich
Exp081586	BRO-rich
Exp082904	BRO-rich
Exp082919	BRO-rich
Exp082932	BRO-rich
Exp082938	BRO-rich
Exp082940	BRO-rich
Exp082975	BRO-rich
Exp082991	BRO-rich
Exp082997	BRO-rich
Exp083956	BRO-rich
Exp087465	BRO-rich
Exp087471	BRO-rich
Exp079165	BRO-rich
Exp079253	BRO-rich
Exp079255	BRO-rich
Exp079260	BRO-rich
Exp079270	BRO-rich
Exp079273	BRO-rich
Exp079275	BRO-rich
Exp079292	BRO-rich
Exp079294	BRO-rich
Exp079301	BRO-rich
Exp081469	BRO-rich
Exp081481	BRO-rich
Exp081495	BRO-rich
Exp081496	BRO-rich
Exp081497	BRO-rich
Exp081498	BRO-rich
Exp081499	BRO-rich
Exp081501	BRO-rich
Exp081502	BRO-rich
Exp081503	BRO-rich
Exp081505	BRO-rich
Exp081506	BRO-rich
Exp081507	BRO-rich
Exp081508	BRO-rich
Exp081509	BRO-rich
Exp081510	BRO-rich
Exp081511	BRO-rich
Exp081512	BRO-rich
Exp081513	BRO-rich
Exp081514	BRO-rich
Exp081515	BRO-rich
Exp081516	BRO-rich
Exp081518	BRO-rich
Exp081519	BRO-rich
Exp081520	BRO-rich
Exp081521	BRO-rich
Exp081523	BRO-rich
Exp081527	BRO-rich
Exp081528	BRO-rich
Exp081529	BRO-rich
Exp081530	BRO-rich
Exp081531	BRO-rich
Exp081534	BRO-rich
Exp081535	BRO-rich
Exp081537	BRO-rich
Exp081542	BRO-rich
Exp081544	BRO-rich
Exp081545	BRO-rich
Exp081547	BRO-rich
Exp081548	BRO-rich
Exp081549	BRO-rich
Exp081551	BRO-rich
Exp081552	BRO-rich
Exp081553	BRO-rich
Exp081554	BRO-rich
Exp081555	BRO-rich
Exp081562	BRO-rich
Exp081563	BRO-rich
Exp081564	BRO-rich
Exp081565	BRO-rich
Exp081568	BRO-rich
Exp082936	BRO-rich
Exp082941	BRO-rich
Exp082945	BRO-rich
Exp082951	BRO-rich
Exp082959	BRO-rich
Exp082960	BRO-rich
Exp087296	BRO-rich
Exp087297	BRO-rich
Exp087299	BRO-rich
Exp087301	BRO-rich
Exp087302	BRO-rich
Exp087304	BRO-rich
Exp087317	BRO-rich
Exp087326	BRO-rich
Exp087347	BRO-rich
Exp072650	BRO-rich
Exp074382	BRO-rich
Exp078926	BRO-rich
Exp078928	BRO-rich
Exp078938	BRO-rich
Exp078939	BRO-rich
Exp078940	BRO-rich
Exp078941	BRO-rich
Exp078942	BRO-rich
Exp078943	BRO-rich
Exp078944	BRO-rich
Exp078945	BRO-rich
Exp078946	BRO-rich
Exp078947	BRO-rich
Exp078948	BRO-rich
Exp078950	BRO-rich
Exp078951	BRO-rich
Exp078953	BRO-rich
Exp078954	BRO-rich
Exp078955	BRO-rich
Exp078956	BRO-rich
Exp078957	BRO-rich
Exp078959	BRO-rich
Exp078960	BRO-rich
Exp078961	BRO-rich
Exp078962	BRO-rich
Exp078963	BRO-rich
Exp078965	BRO-rich
Exp078966	BRO-rich
Exp078968	BRO-rich
Exp078969	BRO-rich
Exp078971	BRO-rich
Exp078973	BRO-rich
Exp078976	BRO-rich
Exp078977	BRO-rich
Exp078979	BRO-rich
Exp078981	BRO-rich
Exp078983	BRO-rich
Exp078985	BRO-rich
Exp078986	BRO-rich
Exp078987	BRO-rich
Exp078988	BRO-rich
Exp078989	BRO-rich
Exp078990	BRO-rich
Exp078992	BRO-rich
Exp078993	BRO-rich
Exp078994	BRO-rich
Exp078995	BRO-rich
Exp078996	BRO-rich
Exp078997	BRO-rich
Exp078998	BRO-rich
Exp078999	BRO-rich
Exp079000	BRO-rich
Exp079002	BRO-rich
Exp079003	BRO-rich
Exp079004	BRO-rich
Exp079007	BRO-rich
Exp079009	BRO-rich
Exp079010	BRO-rich
Exp079011	BRO-rich
Exp079014	BRO-rich
Exp079015	BRO-rich
Exp079016	BRO-rich
Exp079017	BRO-rich
Exp079018	BRO-rich
Exp079020	BRO-rich
Exp079022	BRO-rich
Exp079023	BRO-rich
Exp079026	BRO-rich
Exp079027	BRO-rich
Exp079028	BRO-rich
Exp079031	BRO-rich
Exp079032	BRO-rich
Exp079034	BRO-rich
Exp079036	BRO-rich
Exp079037	BRO-rich
Exp079038	BRO-rich
Exp079039	BRO-rich
Exp079040	BRO-rich
Exp079041	BRO-rich
Exp079042	BRO-rich
Exp079051	BRO-rich
Exp079052	BRO-rich
Exp079054	BRO-rich
Exp079055	BRO-rich
Exp079056	BRO-rich
Exp079058	BRO-rich
Exp079059	BRO-rich
Exp079060	BRO-rich
Exp079061	BRO-rich
Exp079063	BRO-rich
Exp079065	BRO-rich
Exp079068	BRO-rich
Exp079070	BRO-rich
Exp079071	BRO-rich
Exp079072	BRO-rich
Exp079073	BRO-rich
Exp079074	BRO-rich
Exp079075	BRO-rich
Exp079077	BRO-rich
Exp079079	BRO-rich
Exp079080	BRO-rich
Exp079081	BRO-rich
Exp079082	BRO-rich
Exp079083	BRO-rich
Exp079086	BRO-rich
Exp079087	BRO-rich
Exp079088	BRO-rich
Exp079090	BRO-rich
Exp079091	BRO-rich
Exp079092	BRO-rich
Exp079096	BRO-rich
Exp079097	BRO-rich
Exp079109	BRO-rich
Exp079110	BRO-rich
Exp079112	BRO-rich
Exp079113	BRO-rich
Exp079114	BRO-rich
Exp079118	BRO-rich
Exp079119	BRO-rich
Exp079124	BRO-rich
Exp083969	BRO-rich
Exp083971	BRO-rich
Exp083975	BRO-rich
Exp083979	BRO-rich
Exp083981	BRO-rich
Exp083983	BRO-rich
Exp087451	BRO-rich
Exp079229	BRO-rich
Exp079272	BRO-rich
Exp079288	BRO-rich
Exp081459	BRO-rich
Exp081484	BRO-rich
Exp081573	BRO-rich
Exp082935	BRO-rich
Exp082949	BRO-rich
Exp083958	BRO-rich
Exp087322	BRO-rich
Exp079265	BRO-rich
Exp081578	BRO-rich
Exp083920	BRO-rich
Exp083944	BRO-rich
Exp087350	BRO-rich
Exp087470	BRO-rich
Exp079187	BRO-rich
Exp079250	BRO-rich
Exp079251	BRO-rich
Exp079258	BRO-rich
Exp079259	BRO-rich
Exp079262	BRO-rich
Exp079264	BRO-rich
Exp079268	BRO-rich
Exp079277	BRO-rich
Exp079296	BRO-rich
Exp079298	BRO-rich
Exp079304	BRO-rich
Exp081464	BRO-rich
Exp081493	BRO-rich
Exp081584	BRO-rich
Exp081585	BRO-rich
Exp082946	BRO-rich
Exp082947	BRO-rich
Exp083007	BRO-rich
Exp083932	BRO-rich
Exp087311	BRO-rich
Exp087314	BRO-rich
Exp087319	BRO-rich
Exp087323	BRO-rich
Exp087449	BRO-rich
Exp075579	BRO-rich
Exp075591	BRO-rich
Exp075593	BRO-rich
Exp079163	BRO-rich
Exp079254	BRO-rich
Exp079282	BRO-rich
Exp081467	BRO-rich
Exp081582	BRO-rich
Exp082886	BRO-rich
Exp082937	BRO-rich
Exp082948	BRO-rich
Exp082950	BRO-rich
Exp082953	BRO-rich
Exp082956	BRO-rich
Exp082974	BRO-rich
Exp082995	BRO-rich
Exp083921	BRO-rich
Exp083949	BRO-rich
Exp083970	BRO-rich
Exp083985	BRO-rich
Exp083986	BRO-rich
Exp087336	BRO-rich
Exp087340	BRO-rich
Exp087342	BRO-rich
Exp087345	BRO-rich
Exp087351	BRO-rich
Exp076153	BRO-rich
Exp079217	BRO-rich
Exp079306	BRO-rich
Exp081490	BRO-rich
Exp081569	BRO-rich
Exp081570	BRO-rich
Exp087316	BRO-rich
Exp087327	BRO-rich
Exp087335	BRO-rich
Exp087341	BRO-rich
Exp087346	BRO-rich
Exp087420	BRO-rich
Exp081574	BRO-rich
Exp081602	BRO-rich
Exp081611	BRO-rich
Exp082967	BRO-rich
Exp082972	BRO-rich
Exp082989	BRO-rich
Exp083966	BRO-rich
Exp087358	BRO-rich
Exp087423	BRO-rich
Exp087438	BRO-rich
Exp087452	BRO-rich
Exp081589	BRO-rich
Exp081592	BRO-rich
Exp081593	BRO-rich
Exp081594	BRO-rich
Exp081606	BRO-rich
Exp081609	BRO-rich
Exp081610	BRO-rich
Exp081613	BRO-rich
Exp081615	BRO-rich
Exp081616	BRO-rich
Exp081617	BRO-rich
Exp081618	BRO-rich
Exp082954	BRO-rich
Exp082966	BRO-rich
Exp082977	BRO-rich
Exp082983	BRO-rich
Exp082985	BRO-rich
Exp082999	BRO-rich
Exp083000	BRO-rich
Exp083001	BRO-rich
Exp083004	BRO-rich
Exp083005	BRO-rich
Exp083919	BRO-rich
Exp083922	BRO-rich
Exp083923	BRO-rich
Exp083925	BRO-rich
Exp083926	BRO-rich
Exp083927	BRO-rich
Exp083928	BRO-rich
Exp083929	BRO-rich
Exp083930	BRO-rich
Exp083931	BRO-rich
Exp083939	BRO-rich
Exp083940	BRO-rich
Exp083945	BRO-rich
Exp083946	BRO-rich
Exp083948	BRO-rich
Exp083950	BRO-rich
Exp083960	BRO-rich
Exp087305	BRO-rich
Exp087328	BRO-rich
Exp087330	BRO-rich
Exp087348	BRO-rich
Exp087353	BRO-rich
Exp087356	BRO-rich
Exp087364	BRO-rich
Exp087415	BRO-rich
Exp087417	BRO-rich
Exp087419	BRO-rich
Exp087424	BRO-rich
Exp087430	BRO-rich
Exp087431	BRO-rich
Exp087433	BRO-rich
Exp087439	BRO-rich
Exp087445	BRO-rich
Exp087447	BRO-rich
Exp087456	BRO-rich
Exp087458	BRO-rich
Exp087463	BRO-rich
Exp087464	BRO-rich
Exp087466	BRO-rich
Exp087468	BRO-rich
Exp087474	BRO-rich
Exp087475	BRO-rich
Exp089257	BRO-rich
Exp087308	Urinary I-rich
Exp087376	Urinary I-rich
Exp087379	Urinary I-rich
Exp087382	Urinary I-rich
Exp087398	Urinary I-rich
Exp087331	Urinary I-rich
Exp082781	Urinary I-rich
Exp082783	Urinary I-rich
Exp082806	Urinary I-rich
Exp082829	Urinary I-rich
Exp082842	Urinary I-rich
Exp082850	Urinary I-rich
Exp082862	Urinary I-rich
Exp082871	Urinary I-rich
Exp074388	Urinary I-rich
Exp081599	Urinary I-rich
Exp072638	Urinary I-rich
Exp087313	Urinary I-rich
Exp079274	Urinary I-rich
Exp087321	Urinary I-rich
Exp087360	Urinary I-rich
Exp079234	Urinary I-rich
Exp079245	Urinary I-rich
Exp081494	Urinary I-rich
Exp081524	Urinary I-rich
Exp081525	Urinary I-rich
Exp087295	Urinary I-rich
Exp087460	Urinary I-rich
Exp078980	Urinary I-rich
Exp079006	Urinary I-rich
Exp079019	Urinary I-rich
Exp079033	Urinary I-rich
Exp079043	Urinary I-rich
Exp079076	Urinary I-rich
Exp079089	Urinary I-rich
Exp079095	Urinary I-rich
Exp079107	Urinary I-rich
Exp087315	Urinary I-rich
Exp087357	Urinary I-rich
Exp087443	Urinary I-rich
Exp087434	Urinary I-rich
Exp079239	Urinary I-rich
Exp079299	Urinary I-rich
Exp082979	Urinary I-rich
Exp087310	Urinary I-rich
Exp082942	Urinary I-rich
Exp082981	Urinary I-rich
Exp083951	Urinary I-rich
Exp079168	Urinary I-rich
Exp087437	Urinary I-rich
Exp081621	Urinary I-rich
Exp083938	Urinary I-rich
Exp083964	Urinary I-rich
Exp087421	Urinary I-rich
Exp081624	Urinary I-rich
Exp081633	Urinary I-rich
Exp081634	Urinary I-rich
Exp081657	Urinary I-rich
Exp081686	Urinary I-rich
Exp081687	Urinary I-rich
Exp081692	Urinary I-rich
Exp081699	Urinary I-rich
Exp082726	Urinary I-rich
Exp082727	Urinary I-rich
Exp082728	Urinary I-rich
Exp082735	Urinary I-rich
Exp082976	Mixed
Exp087369	Mixed
Exp087380	Mixed
Exp087383	Mixed
Exp087388	Mixed
Exp087392	Mixed
Exp087399	Mixed
Exp082943	Mixed
Exp079172	Mixed
Exp082763	Mixed
Exp082791	Mixed
Exp082816	Mixed
Exp082888	Mixed
Exp072636	Mixed
Exp076193	Mixed
Exp079142	Mixed
Exp079246	Mixed
Exp083961	Mixed
Exp082980	Mixed
Exp082910	Mixed
Exp083918	Mixed
Exp083962	Mixed
Exp079166	Mixed
Exp079261	Mixed
Exp081522	Mixed
Exp081532	Mixed
Exp081540	Mixed
Exp082958	Mixed
Exp089258	Mixed
Exp072648	Mixed
Exp074395	Mixed
Exp076174	Mixed
Exp078930	Mixed
Exp079008	Mixed
Exp079012	Mixed
Exp079021	Mixed
Exp079045	Mixed
Exp079050	Mixed
Exp079053	Mixed
Exp079062	Mixed
Exp079066	Mixed
Exp079099	Mixed
Exp079102	Mixed
Exp079103	Mixed
Exp079111	Mixed
Exp079125	Mixed
Exp079130	Mixed
Exp082882	Mixed
Exp083953	Mixed
Exp083955	Mixed
Exp083967	Mixed
Exp083972	Mixed
Exp083980	Mixed
Exp083984	Mixed
Exp083987	Mixed
Exp083988	Mixed
Exp083989	Mixed
Exp087325	Mixed
Exp081579	Mixed
Exp081588	Mixed
Exp074390	Mixed
Exp081623	Mixed
Exp082913	Mixed
Exp081595	Mixed
Exp081596	Mixed
Exp082916	Mixed
Exp076167	Mixed
Exp081597	Mixed
Exp081598	Mixed
Exp081619	Mixed
Exp081622	Mixed
Exp082891	Mixed
Exp081640	Mixed
Exp081651	Mixed
Exp081655	Mixed
Exp081656	Mixed
Exp081661	Mixed
Exp082709	Mixed
Exp082750	Mixed
Exp082900	Mixed
Exp087370	Cervical-rich
Exp087387	Cervical-rich
Exp087403	Cervical-rich
Exp087404	Cervical-rich
Exp087407	Cervical-rich
Exp087413	Cervical-rich
Exp079161	Cervical-rich
Exp079237	Cervical-rich
Exp079151	Cervical-rich
Exp079231	Cervical-rich
Exp079232	Cervical-rich
Exp079235	Cervical-rich
Exp082801	Cervical-rich
Exp087418	Cervical-rich
Exp079147	Cervical-rich
Exp079162	Cervical-rich
Exp079183	Cervical-rich
Exp079184	Cervical-rich
Exp079210	Cervical-rich
Exp079212	Cervical-rich
Exp081612	Cervical-rich
Exp079207	Cervical-rich
Exp081458	Cervical-rich
Exp079175	Cervical-rich
Exp079203	Cervical-rich
Exp079215	Cervical-rich
Exp079238	Cervical-rich
Exp079154	Cervical-rich
Exp079180	Cervical-rich
Exp079186	Cervical-rich
Exp079193	Cervical-rich
Exp079197	Cervical-rich
Exp079205	Cervical-rich
Exp079220	Cervical-rich
Exp079225	Cervical-rich
Exp087362	Cervical-rich
Exp087469	Cervical-rich
Exp079155	Cervical-rich
Exp079156	Cervical-rich
Exp079176	Cervical-rich
Exp079178	Cervical-rich
Exp079181	Cervical-rich
Exp079189	Cervical-rich
Exp079195	Cervical-rich
Exp079198	Cervical-rich
Exp079199	Cervical-rich
Exp079202	Cervical-rich
Exp079206	Cervical-rich
Exp079209	Cervical-rich
Exp079211	Cervical-rich
Exp079216	Cervical-rich
Exp079219	Cervical-rich
Exp079221	Cervical-rich
Exp079222	Cervical-rich
Exp079303	Cervical-rich
Exp081457	Cervical-rich
Exp081538	Cervical-rich
Exp081541	Cervical-rich
Exp078932	Cervical-rich
Exp078933	Cervical-rich
Exp078934	Cervical-rich
Exp078958	Cervical-rich
Exp079030	Cervical-rich
Exp079047	Cervical-rich
Exp079048	Cervical-rich
Exp079049	Cervical-rich
Exp079064	Cervical-rich
Exp079085	Cervical-rich
Exp079093	Cervical-rich
Exp079098	Cervical-rich
Exp079100	Cervical-rich
Exp079108	Cervical-rich
Exp079115	Cervical-rich
Exp079116	Cervical-rich
Exp079117	Cervical-rich
Exp079120	Cervical-rich
Exp079121	Cervical-rich
Exp079122	Cervical-rich
Exp079123	Cervical-rich
Exp079127	Cervical-rich
Exp079128	Cervical-rich
Exp079129	Cervical-rich
Exp079131	Cervical-rich
Exp079132	Cervical-rich
Exp079133	Cervical-rich
Exp079134	Cervical-rich
Exp079135	Cervical-rich
Exp079136	Cervical-rich
Exp079137	Cervical-rich
Exp083973	Cervical-rich
Exp083982	Cervical-rich
Exp079159	Cervical-rich
Exp079244	Cervical-rich
Exp079287	Cervical-rich
Exp079307	Cervical-rich
Exp079177	Cervical-rich
Exp079182	Cervical-rich
Exp079194	Cervical-rich
Exp079224	Cervical-rich
Exp079227	Cervical-rich
Exp079236	Cervical-rich
Exp079174	Cervical-rich
Exp079192	Cervical-rich
Exp079201	Cervical-rich
Exp079218	Cervical-rich
Exp083965	Cervical-rich
Exp087338	Cervical-rich
Exp087454	Cervical-rich
Exp079153	Cervical-rich
Exp079208	Cervical-rich
Exp079179	Cervical-rich
Exp079196	Cervical-rich
Exp079213	Cervical-rich
Exp079305	Cervical-rich
Exp079139	Cervical-rich
Exp079145	Cervical-rich
Exp079152	Cervical-rich
Exp079157	Cervical-rich
Exp079158	Cervical-rich
Exp082996	Cervical-rich
Exp083006	Cervical-rich
Exp087432	Cervical-rich
Exp087441	Cervical-rich
Exp087472	Cervical-rich
Exp076181	Cervical-rich
Exp081626	Cervical-rich
Exp081643	Cervical-rich
Exp081646	Cervical-rich
Exp081648	Cervical-rich
Exp081665	Cervical-rich
Exp081674	Cervical-rich
Exp081693	Cervical-rich
Exp082751	Cervical-rich
Exp087444	Urinary II-rich
Exp079295	Urinary II-rich
Exp081478	Urinary II-rich
Exp082752	Urinary II-rich
Exp082753	Urinary II-rich
Exp082755	Urinary II-rich
Exp082756	Urinary II-rich
Exp082757	Urinary II-rich
Exp082758	Urinary II-rich
Exp082759	Urinary II-rich
Exp082760	Urinary II-rich
Exp082761	Urinary II-rich
Exp082762	Urinary II-rich
Exp082764	Urinary II-rich
Exp082765	Urinary II-rich
Exp082766	Urinary II-rich
Exp082768	Urinary II-rich
Exp082769	Urinary II-rich
Exp082770	Urinary II-rich
Exp082771	Urinary II-rich
Exp082772	Urinary II-rich
Exp082773	Urinary II-rich
Exp082774	Urinary II-rich
Exp082775	Urinary II-rich
Exp082777	Urinary II-rich
Exp082778	Urinary II-rich
Exp082779	Urinary II-rich
Exp082784	Urinary II-rich
Exp082785	Urinary II-rich
Exp082786	Urinary II-rich
Exp082787	Urinary II-rich
Exp082788	Urinary II-rich
Exp082789	Urinary II-rich
Exp082792	Urinary II-rich
Exp082793	Urinary II-rich
Exp082794	Urinary II-rich
Exp082795	Urinary II-rich
Exp082796	Urinary II-rich
Exp082797	Urinary II-rich
Exp082798	Urinary II-rich
Exp082799	Urinary II-rich
Exp082800	Urinary II-rich
Exp082802	Urinary II-rich
Exp082803	Urinary II-rich
Exp082804	Urinary II-rich
Exp082805	Urinary II-rich
Exp082808	Urinary II-rich
Exp082809	Urinary II-rich
Exp082810	Urinary II-rich
Exp082811	Urinary II-rich
Exp082812	Urinary II-rich
Exp082813	Urinary II-rich
Exp082814	Urinary II-rich
Exp082815	Urinary II-rich
Exp082817	Urinary II-rich
Exp082818	Urinary II-rich
Exp082819	Urinary II-rich
Exp082820	Urinary II-rich
Exp082821	Urinary II-rich
Exp082822	Urinary II-rich
Exp082823	Urinary II-rich
Exp082824	Urinary II-rich
Exp082825	Urinary II-rich
Exp082826	Urinary II-rich
Exp082828	Urinary II-rich
Exp082830	Urinary II-rich
Exp082831	Urinary II-rich
Exp082832	Urinary II-rich
Exp082833	Urinary II-rich
Exp082834	Urinary II-rich
Exp082835	Urinary II-rich
Exp082836	Urinary II-rich
Exp082837	Urinary II-rich
Exp082838	Urinary II-rich
Exp082839	Urinary II-rich
Exp082840	Urinary II-rich
Exp082841	Urinary II-rich
Exp082843	Urinary II-rich
Exp082845	Urinary II-rich
Exp082847	Urinary II-rich
Exp082848	Urinary II-rich
Exp082849	Urinary II-rich
Exp082851	Urinary II-rich
Exp082852	Urinary II-rich
Exp082853	Urinary II-rich
Exp082854	Urinary II-rich
Exp082855	Urinary II-rich
Exp082856	Urinary II-rich
Exp082857	Urinary II-rich
Exp082858	Urinary II-rich
Exp082859	Urinary II-rich
Exp082860	Urinary II-rich
Exp082861	Urinary II-rich
Exp082863	Urinary II-rich
Exp082864	Urinary II-rich
Exp082865	Urinary II-rich
Exp082866	Urinary II-rich
Exp082867	Urinary II-rich
Exp082868	Urinary II-rich
Exp082869	Urinary II-rich
Exp082870	Urinary II-rich
Exp087344	Urinary II-rich
Exp079249	Urinary II-rich
Exp079283	Urinary II-rich
Exp081472	Urinary II-rich
Exp081486	Urinary II-rich
Exp083009	Urinary II-rich
Exp087349	Urinary II-rich
Exp087365	Urinary II-rich
Exp082994	Urinary II-rich
Exp075590	Urinary II-rich
Exp079144	Urinary II-rich
Exp079223	Urinary II-rich
Exp079247	Urinary II-rich
Exp081485	Urinary II-rich
Exp082987	Urinary II-rich
Exp082993	Urinary II-rich
Exp087429	Urinary II-rich
Exp079143	Urinary II-rich
Exp079188	Urinary II-rich
Exp079248	Urinary II-rich
Exp079290	Urinary II-rich
Exp081462	Urinary II-rich
Exp081470	Urinary II-rich
Exp081504	Urinary II-rich
Exp081533	Urinary II-rich
Exp081536	Urinary II-rich
Exp081543	Urinary II-rich
Exp081546	Urinary II-rich
Exp081559	Urinary II-rich
Exp081566	Urinary II-rich
Exp081567	Urinary II-rich
Exp082957	Urinary II-rich
Exp076158	Urinary II-rich
Exp078936	Urinary II-rich
Exp078937	Urinary II-rich
Exp079025	Urinary II-rich
Exp079035	Urinary II-rich
Exp079044	Urinary II-rich
Exp079046	Urinary II-rich
Exp079069	Urinary II-rich
Exp079084	Urinary II-rich
Exp079094	Urinary II-rich
Exp083974	Urinary II-rich
Exp087422	Urinary II-rich
Exp076179	Urinary II-rich
Exp079242	Urinary II-rich
Exp079256	Urinary II-rich
Exp081583	Urinary II-rich
Exp082931	Urinary II-rich
Exp076198	Urinary II-rich
Exp079276	Urinary II-rich
Exp081489	Urinary II-rich
Exp081581	Urinary II-rich
Exp082952	Urinary II-rich
Exp079150	Urinary II-rich
Exp079293	Urinary II-rich
Exp081603	Urinary II-rich
Exp082982	Urinary II-rich
Exp083002	Urinary II-rich
Exp083003	Urinary II-rich
Exp083977	Urinary II-rich
Exp087359	Urinary II-rich
Exp087366	Urinary II-rich
Exp087427	Urinary II-rich
Exp087435	Urinary II-rich
Exp081625	Urinary II-rich
Exp081627	Urinary II-rich
Exp081628	Urinary II-rich
Exp081630	Urinary II-rich
Exp081631	Urinary II-rich
Exp081632	Urinary II-rich
Exp081635	Urinary II-rich
Exp081636	Urinary II-rich
Exp081638	Urinary II-rich
Exp081639	Urinary II-rich
Exp081641	Urinary II-rich
Exp081642	Urinary II-rich
Exp081644	Urinary II-rich
Exp081645	Urinary II-rich
Exp081649	Urinary II-rich
Exp081650	Urinary II-rich
Exp081652	Urinary II-rich
Exp081653	Urinary II-rich
Exp081654	Urinary II-rich
Exp081658	Urinary II-rich
Exp081659	Urinary II-rich
Exp081660	Urinary II-rich
Exp081662	Urinary II-rich
Exp081663	Urinary II-rich
Exp081664	Urinary II-rich
Exp081666	Urinary II-rich
Exp081667	Urinary II-rich
Exp081668	Urinary II-rich
Exp081669	Urinary II-rich
Exp081670	Urinary II-rich
Exp081671	Urinary II-rich
Exp081672	Urinary II-rich
Exp081673	Urinary II-rich
Exp081675	Urinary II-rich
Exp081676	Urinary II-rich
Exp081678	Urinary II-rich
Exp081679	Urinary II-rich
Exp081680	Urinary II-rich
Exp081681	Urinary II-rich
Exp081682	Urinary II-rich
Exp081683	Urinary II-rich
Exp081684	Urinary II-rich
Exp081685	Urinary II-rich
Exp081688	Urinary II-rich
Exp081689	Urinary II-rich
Exp081690	Urinary II-rich
Exp081691	Urinary II-rich
Exp081694	Urinary II-rich
Exp081695	Urinary II-rich
Exp081696	Urinary II-rich
Exp081697	Urinary II-rich
Exp081698	Urinary II-rich
Exp081700	Urinary II-rich
Exp082708	Urinary II-rich
Exp082710	Urinary II-rich
Exp082711	Urinary II-rich
Exp082712	Urinary II-rich
Exp082714	Urinary II-rich
Exp082715	Urinary II-rich
Exp082716	Urinary II-rich
Exp082717	Urinary II-rich
Exp082719	Urinary II-rich
Exp082720	Urinary II-rich
Exp082721	Urinary II-rich
Exp082722	Urinary II-rich
Exp082723	Urinary II-rich
Exp082724	Urinary II-rich
Exp082725	Urinary II-rich
Exp082729	Urinary II-rich
Exp082730	Urinary II-rich
Exp082731	Urinary II-rich
Exp082732	Urinary II-rich
Exp082733	Urinary II-rich
Exp082734	Urinary II-rich
Exp082736	Urinary II-rich
Exp082737	Urinary II-rich
Exp082738	Urinary II-rich
Exp082739	Urinary II-rich
Exp082741	Urinary II-rich
Exp082742	Urinary II-rich
Exp082743	Urinary II-rich
Exp082744	Urinary II-rich
Exp082745	Urinary II-rich
Exp082746	Urinary II-rich
Exp082747	Urinary II-rich
Exp082748	Urinary II-rich
Exp082749	Urinary II-rich

## Sheet: Enrichment score
Type	Gastrointestinal-rich	BRO-rich	Urinary I-rich	Mixed	Cervical-rich	Urinary II-rich
CRCA	1.6125	1.22857	0.521212	1.075	0.905263	0.475889
STAD	1.42602	1.1641	1.38281	0.855612	1.02931	0.450916
BRCA	0.807137	1.46838	0.670867	0.830198	0.832279	0.39377
OVCA	0.465833	1.55151	1.35515	0	1.34496	0.176759
LIHC	1.10913	1.08649	2.41991	0.665476	1.60115	0.210427
HNCA	1.16458	1.36898	1.69394	2.795	0	0
TGCT	0.506341	1.38882	1.47299	1.82283	1.09644	0
LC	1.19957	1.25343	0.654311	1.6794	1.19055	0.208621
CECA	1.10913	1.19514	0.806638	1.99643	1.60115	0
RCC	0.985417	0	1.04242	0.5375	0.38797	3.39921
BLCA	0.481233	0	1.67994	0.923967	0.625241	3.17728
CHOL	0.646991	1.52109	0.941077	0	0.934002	0.490997
ESCA	0.794034	1.34824	1.15496	0	1.33732	0.502156
ML	1.08918	1.24751	0.853063	0.703777	1.26997	0.476868
PAAD	1.05871	1.45195	0	1.27045	1.52837	0
SARC	0.685049	1.47635	0.996435	0.822059	0.988943	0.25994
THCA	1.05871	1.45195	1.53994	1.27045	0	0.401725
Others	1.24777	1.05933	0.907468	0.748661	1.50107	0.631282

## Sheet: CCP_Cluster_proteins
Gene_Symbol	Gastrointestinal-rich	BRO-rich	Urinary I-rich	Mixed	Cervical-rich	Urinary II-rich	Kruskal-Wallis pvalue
A1BG	0.158966	0.0237104	-0.507516	0.163954	0.0116403	-0.0318071	0.000636499
ABCF2	0.572954	-0.0420125	-0.0932362	-0.101141	-0.123396	-0.0148654	0.0087788
ABI3BP	0.194731	0.113769	-0.385855	-0.0413381	-0.487358	0.0756961	4.43792e-14
ABLIM1	0.491225	-0.0322828	0.0325172	-0.0113713	-0.0690019	-0.0924831	6.86226e-05
ACACA	0.250005	0.022532	-0.304445	-0.0227375	0.0546527	-0.0806229	0.00636197
ACACB	0.238087	-0.0137206	-0.184514	0.143398	-0.0429272	-0.0384106	0.0158017
ACP1	0.597196	-0.11324	0.0299532	-0.0422058	0.0515103	-0.0288325	0.0378437
ACTA1	0.446023	-0.118368	-0.404784	0.0878129	0.512074	-0.131356	6.69996e-12
ACTA2	0.453008	-0.121742	-0.399242	0.100933	0.502918	-0.128253	2.94209e-12
ACTB	0.452966	-0.130538	-0.40159	0.166573	0.518979	-0.139787	2.6275e-13
ACTBL2	0.423342	-0.120756	-0.400141	0.152438	0.48638	-0.126264	3.49364e-12
ACTC1	0.445998	-0.121642	-0.402995	0.0935765	0.51245	-0.127492	1.81508e-12
ACTG1	0.452921	-0.130538	-0.401567	0.166669	0.518952	-0.139793	2.6275e-13
ACTG2	0.437257	-0.123029	-0.395132	0.10592	0.512023	-0.12722	3.60139e-12
ACTR2	0.24588	0.0069532	-0.280858	0.108315	-0.11878	-0.00530592	0.0198638
AGT	0.358315	-0.0064876	-0.443712	0.237004	-0.232937	0.0398656	9.69597e-06
AKR1C1	0.287285	0.0557571	-0.179338	-0.0331762	-0.263483	-0.0212122	0.00360298
ALAD	0.301952	0.0560079	-0.418009	-0.0657044	-0.17201	-0.00280229	4.46535e-05
ALG14	0.366891	0.184024	-0.135187	0.0355506	-0.11754	-0.409811	2.33855e-33
AMBP	0.201702	0.165696	-0.699199	-0.104651	-0.458414	0.059027	1.87518e-18
ANK1	0.387452	0.0169318	-0.359335	-0.104962	-0.153927	0.0280373	1.00795e-13
ANXA6	0.230377	0.120833	-0.449455	0.231081	-0.600717	0.0385323	2.77817e-20
AP2M1	0.315111	-0.0212013	-0.0464392	-0.139605	-0.01379	-0.0149983	0.00110523
APCS	0.600953	0.0534998	-0.548597	-0.156824	-0.278078	0.00723866	1.58247e-14
APOF	0.0583247	0.00572624	-0.607993	0.164838	-0.0223629	0.0850185	1.73479e-05
AQR	0.171001	0.0415674	-0.305355	0.0914096	-0.201588	0.0113352	0.00511799
ARHGAP4	0.298967	0.0396041	-0.146187	-0.0437835	-0.262521	-0.000159927	1.92896e-05
ARL2	0.268215	0.0485187	-0.438409	0.224722	-0.489832	0.105067	6.70141e-11
ATF6	1.16129	-0.0788473	-0.256993	0.104755	-0.227342	-0.134509	3.68493e-20
AZU1	0.381806	-0.0294417	-0.130964	-0.101567	0.111578	-0.0802284	0.00624553
B4GALT5	0.447518	-0.0160316	-0.143788	0.0240564	-0.0671555	-0.0735538	3.67588e-06
BCAM	0.838888	-0.100046	0.00486195	-0.0904823	-0.134236	-0.0266387	3.16032e-07
BCS1L	0.363752	-0.0219006	-0.0535236	-0.0569758	-0.0728531	-0.0253313	0.000314908
BLOC1S4	0.30221	-0.0116145	-0.0444503	-0.0411611	-0.0123339	-0.0610832	1.02113e-19
C1R	0.319602	0.0643122	-0.689099	0.056271	-0.0830611	-0.0401926	2.0052e-07
C1S	0.394219	0.0527622	-0.73958	-0.0556317	-0.0709971	-0.0039253	7.37847e-08
C2	0.697998	-0.0886703	-0.619682	-0.10887	0.373188	-0.0932203	4.87603e-20
C3	0.400738	0.132927	-1.14136	-0.248501	-0.110818	0.0250723	9.12265e-18
C4A	0.456205	0.088027	-0.852032	-0.1595	-0.167681	0.01726	3.63487e-14
C4B	0.486657	0.0832965	-0.858111	-0.16478	-0.154769	0.0113343	1.39114e-14
C4BPA	0.944297	-0.0759027	-1.02579	-0.0479335	0.11823	0.00929723	7.10229e-32
C4BPB	0.311352	-0.120464	-0.533015	0.0585267	0.327796	0.0633892	4.82014e-09
C5	0.474151	0.129846	-0.755524	-0.0230022	-0.460825	0.0152237	1.94985e-18
C6	0.397952	-0.089305	-0.941704	0.0636834	0.396019	0.0393019	3.23313e-20
C7	0.285538	-0.00746165	-0.331267	0.206016	-0.226099	0.0462378	2.51384e-05
C8A	0.456291	0.0543712	-0.664685	0.011808	-0.212523	0.00294197	1.44623e-11
C8B	0.492627	0.00506126	-0.532485	-0.0719446	-0.117622	0.0267633	2.74912e-08
C8G	0.322553	-0.039674	-0.746893	-0.0533848	0.180398	0.0713357	1.20497e-09
C9	1.10624	-0.0956873	-0.596561	-0.0858041	0.0915278	-0.0997962	8.13895e-22
CALR	0.422453	-0.168937	-0.322625	0.0441393	0.590063	-0.0730931	6.40882e-16
CAPZB	0.3867	0.00288683	-0.159012	-0.0708473	-0.068312	-0.0525284	1.25561e-05
CD14	0.513833	-0.0314444	-0.265703	-0.00227165	0.037838	-0.0839311	3.47005e-12
CDC5L	0.282247	-0.0316736	-0.0602091	0.00131941	-9.64e-05	-0.0304131	0.00383859
CFB	1.13682	-0.0662146	-0.87848	-0.0912461	0.0833406	-0.0889103	1.92656e-32
CFH	0.095772	-0.0129791	-0.772659	-0.145719	0.367565	0.0432116	1.52225e-09
CFHR1	0.134948	-0.0430961	-0.752303	-0.17394	0.425792	0.0596798	6.77372e-12
CFHR3	0.126231	0.0728507	-0.526091	0.0165533	-0.160544	0.0274115	8.41888e-07
CFHR5	1.43692	-0.114837	-0.621227	-0.0903441	0.0574501	-0.162395	2.96538e-33
CFI	0.707967	0.0631363	-0.897859	0.137316	-0.316106	-0.033937	1.20557e-21
CHI3L1	0.762998	-0.048969	-0.114319	0.299946	-0.351014	-0.0751729	4.87258e-16
CLIC1	0.557973	-0.130489	-0.357958	0.0349968	0.358445	-0.0651122	1.11054e-13
CP	0.740515	-0.0239621	-0.572088	-0.123549	-0.0522108	-0.0188231	4.48661e-14
CPN1	0.315426	-0.0293725	-0.618691	0.0294934	0.0602361	0.0576061	1.03011e-06
CPN2	0.371501	0.0304061	-0.738628	-0.051548	-0.194727	0.111498	3.29576e-09
CRP	1.84915	-0.23466	-0.144659	-0.0232978	0.0436609	-0.225023	1.12979e-40
DIRAS2	0.763672	-0.0900882	-0.230546	-0.0216535	0.0334022	-0.0658637	4.37604e-08
DNM2	0.267532	0.0297266	-0.122151	-0.017886	-0.161919	-0.0364465	0.0201882
DPP4	0.29763	0.0670249	-0.353409	0.055582	-0.222499	-0.0511617	0.00070142
DSC3	0.262945	0.00968539	-0.249682	-0.208339	0.0156146	0.00427217	0.00883271
DTNA	0.323899	-0.0282276	0.00566806	-0.0374583	-0.0302152	-0.0419824	1.97147e-05
EIF2B2	0.371569	-0.0144865	-0.023029	-0.0663935	-0.0450334	-0.0622584	0.000155581
EIF2D	0.310961	0.0169395	-0.066587	0.0340917	-0.0371765	-0.124667	1.56294e-11
ELAVL1	0.319697	-0.00245053	-0.0338588	-0.083115	-0.0353689	-0.0628546	8.30936e-05
ENO1	0.532489	-0.13401	-0.353496	0.484097	0.169819	-0.0926356	1.94653e-14
F9	0.523008	0.0900378	-0.830015	0.223883	-0.547125	0.0605164	2.47424e-23
FAM20C	0.376564	-0.0473826	-0.135477	0.260171	-0.0698557	-0.0613207	0.000214004
FBN1	0.184053	0.113302	-0.313896	-0.0213111	-0.308061	-0.0387072	7.21284e-07
FBN2	0.192541	0.145014	-0.390359	0.0953043	-0.578475	0.0218794	3.81007e-15
FERMT3	0.846367	0.00395132	-0.38218	0.046449	-0.334885	-0.0677462	1.67995e-19
FGA	0.548545	-0.101452	0.104152	0.179244	-0.0442144	-0.0722603	2.58482e-15
FGB	0.548198	-0.101534	-0.0796993	0.0914379	-0.0751682	0.0200275	5.11104e-10
FGG	0.508572	-0.101584	0.00502089	0.0712669	-0.0079176	-0.0159147	3.72362e-15
FGL1	1.71623	-0.177365	-0.260276	0.11311	-0.153661	-0.194793	6.80516e-36
FKBP9	0.290964	-0.0269422	-0.135571	0.0615504	-0.0288251	-0.027168	0.00403799
FLNA	0.289709	-0.102582	-0.399195	0.0524284	0.426724	-0.0480185	4.441e-06
FXR1	0.35411	0.0307452	-0.0852968	0.00427316	-0.237153	-0.0483421	7.02536e-07
GALNT7	0.440365	0.0477285	-0.0757652	0.0223284	-0.0876726	-0.20074	2.17928e-11
GAS6	0.727396	0.0683899	-0.782901	0.0140637	-0.355526	-0.021778	3.31859e-22
GATAD2B	0.216013	0.0319591	-0.298734	-0.0451701	-0.0920928	-0.00323618	6.44796e-05
GOLGA3	0.566389	-0.0564029	-0.0596279	-0.0640229	-0.00431344	-0.0676084	0.0173212
GSTA4	0.296365	0.186634	-0.192727	-0.0652506	-0.0693068	-0.366577	6.81666e-20
GSTM2	0.441407	0.0392514	-0.0136997	-0.267504	-0.105964	-0.0996463	7.65904e-05
GSTO1	0.533796	0.0564401	-0.396374	-0.0112986	-0.24775	-0.0746437	1.65147e-10
HCFC1	0.320354	0.00641601	-0.100583	-0.0506728	0.0978547	-0.143163	2.78254e-21
HNF4A	0.609724	-0.0754953	-0.044304	-0.0653818	0.184142	-0.149711	1.89287e-10
HP	0.621621	-0.0946833	-0.270953	0.114081	0.0580936	-0.0484221	3.75449e-24
HP1BP3	0.246892	-0.0373989	-0.430865	-0.13626	0.121419	0.0704072	0.00016641
HPR	0.549833	-0.121392	-0.188194	0.106476	0.042314	0.019657	6.14894e-20
HPX	0.105619	0.187713	-0.714764	0.108402	-0.56295	0.0444888	1.7158e-20
HSPB1	0.395993	-0.0331532	-0.256598	0.0609254	-0.027112	-0.0241222	0.0322961
ICAM1	0.686669	-0.164032	-0.0985928	0.0577915	0.303208	-0.0948127	4.24999e-13
INIP	0.760694	-0.065456	-0.274426	0.0854949	-0.167144	-0.0294489	2.40286e-11
INTS14	0.356853	0.0198776	-0.331474	0.0576245	-0.267227	0.0348244	2.21087e-06
ITGB3	0.344346	-0.0518603	-0.181495	-0.0365054	0.174628	-0.0631312	2.6398e-07
ITIH3	1.07604	-0.0886047	-0.535103	0.0841734	-0.0433816	-0.100912	2.04369e-23
ITIH4	0.781632	0.0526469	-0.792588	0.112284	-0.328791	-0.054452	1.35475e-20
KRT15	0.299952	-0.014347	-0.0769099	-0.00977299	-0.00197778	-0.0618357	0.000109792
KRT6A	0.278514	-0.0197586	-0.260571	0.0173898	-0.036473	0.014236	0.00369189
KRT6C	0.332721	-0.0197404	-0.283469	0.00154428	-0.0267726	-0.000483032	0.00087584
KRT75	0.443236	0.0265972	-0.147499	0.0305495	-0.336253	-0.014113	9.57543e-08
KRT84	0.402599	0.093616	-0.479644	-0.019841	-0.448119	0.0328943	4.0739e-14
LACTB	0.845903	0.0110971	-0.202058	-0.237678	-0.283109	-0.0657735	7.4776e-10
LAMB3	0.373669	-0.108197	-0.0541753	0.0155749	0.140908	0.00289778	2.90482e-07
LBP	1.33328	-0.101252	-0.332198	0.0245209	-0.113887	-0.171031	9.70636e-26
LGALS3BP	0.287802	-0.082582	-0.291805	-0.0110306	0.271152	-0.0121957	0.000281395
LMAN2	0.359588	-0.0552955	-0.155108	-0.0272422	0.120946	-0.0438538	0.00130296
LNPK	0.310395	-0.0230932	-0.0621989	-0.052133	-0.0301478	-0.0244936	0.000833899
LONP2	0.352706	-0.0726665	-0.361295	0.0213218	0.37881	-0.104724	6.01064e-10
LRG1	1.62742	-0.165464	-0.46254	-0.0668257	0.0946522	-0.205019	5.31183e-39
LRP1	0.228182	0.0338116	-0.319033	0.078982	-0.116451	-0.0325988	0.0197059
LSAMP	0.227873	0.143693	-0.560954	-0.200547	-0.500465	0.108077	6.51829e-17
MAN1A1	0.475814	0.0279205	-0.29517	0.0991799	-0.124363	-0.123605	5.02252e-09
MASP2	0.616531	0.00775297	-0.569708	0.010218	-0.172914	-0.0126682	1.75066e-11
MFGE8	0.434823	-0.0229478	-0.31566	-0.111518	0.105774	-0.0585435	3.72608e-05
MMP10	0.360665	-0.00277989	-0.0487551	-0.179876	-0.108912	-0.00461853	0.000321998
MMP8	0.319211	0.0144791	-0.0383258	-0.0347474	-0.162751	-0.0426239	0.00795759
MPC2	0.362516	0.0143882	-0.339149	0.00238643	-0.136951	-0.00570907	0.000273536
MRC1	0.561004	-0.0486836	-0.220699	-0.013758	-0.00536124	-0.0538406	1.23333e-06
NCF1	0.394927	-0.0672128	-0.31706	0.121448	0.0304577	0.00861865	3.69574e-06
NCF1B	0.474835	-0.0639306	-0.353505	0.159348	0.0496956	-0.040649	2.56834e-06
NCF1C	0.451395	-0.0587988	-0.350104	0.160316	0.0334536	-0.0343493	4.46705e-06
NDUFA12	0.352758	0.0190774	-0.104108	-0.0930493	0.00513199	-0.116918	2.18382e-15
NDUFAF3	0.131778	0.0993449	-0.520087	-0.0958812	0.0184969	-0.0861403	1.59851e-05
NDUFB4	0.424813	0.0472874	-0.421487	0.0751374	-0.387551	0.0371486	1.04954e-10
NID1	0.368997	-0.130746	-0.0373924	0.193473	0.121399	-0.00203179	1.55292e-08
NME2	0.445965	-0.0759848	-0.0552537	-0.020578	0.0675498	-0.0366453	4.45262e-06
OAF	0.825337	-0.138906	-0.345092	0.0757422	0.0922501	-0.0265662	4.02598e-15
OIT3	0.484406	-0.0517672	0.0630157	0.0427798	-0.134272	-0.0429262	3.2112e-08
OLFM1	0.369644	-0.0999292	-0.140387	0.117017	0.104844	-0.00221562	0.00399464
ORM1	1.32033	-0.138758	-0.194291	-0.0359617	-0.00685289	-0.166594	5.16649e-31
ORM2	1.19493	-0.147128	-0.224793	-0.0925913	0.0515371	-0.107635	2.3482e-23
P3H1	0.233404	0.0325837	-0.259236	0.0341904	-0.259583	0.0416049	3.71852e-06
PCBP2	0.287108	0.10316	-0.669276	-0.14912	-0.378347	0.111903	6.47991e-14
PCK1	0.367958	0.0261286	-0.530601	0.0749938	-0.25861	0.060428	7.05839e-10
PDHB	0.0972305	0.0189013	-0.464701	-0.0477652	0.11299	0.00343113	0.00018482
PGM2	0.362586	-0.0553514	-0.127228	-0.0680289	0.14018	-0.0493702	0.00170188
PKM	0.433626	-0.117519	-0.396381	0.356842	0.312421	-0.110601	2.11534e-11
PLEKHM1	0.557152	-0.027107	-0.153092	0.0780189	-0.190827	-0.0433263	0.0366538
POTEE	0.443614	-0.104754	-0.41344	0.14521	0.426713	-0.127826	5.71651e-11
POTEF	0.451405	-0.104462	-0.417214	0.165942	0.405634	-0.125837	1.1213e-10
POTEI	0.442699	-0.0972062	-0.421489	0.176847	0.382733	-0.126882	5.29015e-10
POTEJ	0.437278	-0.100534	-0.405132	0.128378	0.430644	-0.132507	3.04452e-10
POTEKP	0.449059	-0.102569	-0.405587	0.144905	0.410155	-0.127373	2.49628e-10
PPOX	0.403304	0.0201156	-0.258861	0.169732	-0.406389	0.0355028	3.4336e-11
PRB3	0.251523	-0.0130229	-0.227349	-0.10393	0.107059	-0.0343258	0.0394186
PRG4	0.365128	-0.0118231	-0.197942	-0.121417	-0.198414	0.0786862	5.82879e-12
PROS1	0.824043	0.0338746	-0.935128	-0.155044	-0.171009	0.00458269	5.5169e-24
PSIP1	1.02195	-0.0720023	-0.244613	0.0299729	-0.212311	-0.082381	3.40127e-18
PSMB10	0.538033	-0.0878715	-0.20183	-0.118624	0.256022	-0.0783965	1.48241e-08
PVR	0.411246	-0.133004	-0.14275	0.118718	0.0994416	0.0489746	1.21641e-06
PYCR2	0.538912	-0.0998657	-0.22958	-0.101452	-0.361228	0.270792	5.00104e-13
RAB1B	0.276163	-0.0127608	-0.20185	-0.0345411	-0.00342689	-0.0146942	0.00324596
RABEP2	0.283449	0.117703	-0.217545	-0.00477737	-0.326525	-0.105603	2.83276e-07
RBBP4	0.296017	-0.00288231	-0.0517198	-0.0512159	-0.0234328	-0.0647352	3.34619e-28
RBCK1	0.143685	-0.0939069	-0.389371	0.0575521	0.0898247	0.163511	4.89343e-05
RCC1L	0.703385	-0.0222755	-0.0772465	-0.01737	-0.0524572	-0.170535	4.66892e-10
RCN1	1.27898	-0.0513113	-0.349588	0.113581	-0.362673	-0.139991	1.16417e-29
RNASEH2C	0.418108	-0.0167033	-0.313066	0.085216	0.283842	-0.220789	8.62373e-09
RPAP3	0.500102	-0.0530122	-0.564572	-0.049677	0.283162	-0.0729582	5.13889e-09
RPIA	0.558375	-0.0649445	-0.155933	-0.0813986	0.0944914	-0.0693481	0.000337628
RPL27	0.2679	0.00715363	-0.123323	-0.0332999	-0.0513014	-0.0458389	0.0157318
RPS15	0.567116	-0.067249	-0.0574116	-0.0597938	-0.00278837	-0.0495952	0.00968006
RTN4	0.567234	-0.0487908	-0.191477	-0.0996607	-0.0848231	0.00531593	4.33625e-20
RWDD4	0.450602	0.217649	-0.221987	-0.0129782	0.0801238	-0.572621	1.1613e-40
SAA1	1.29895	-0.124635	-0.132355	-0.104059	-0.106568	-0.128041	1.0115e-52
SAA2	1.28864	-0.124652	-0.136796	-0.0918112	-0.109555	-0.125241	1.01982e-51
SCG3	0.164984	-0.0447724	-0.299837	0.147141	0.0653803	0.0214324	2.31625e-05
SEC22B	0.48021	-0.0406125	-0.101837	-0.103417	0.0384597	-0.064508	0.000470249
SERPINA1	1.17925	-0.152104	-0.290002	-0.0406102	0.205467	-0.172394	1.07607e-24
SERPINA10	0.548143	0.0144708	-0.576495	0.110236	-0.16347	-0.0345502	3.62967e-19
SERPINA3	1.38213	-0.206989	-0.475108	-0.0494016	0.184181	-0.0808166	1.20173e-34
SERPINA6	0.147959	0.0248042	-0.803432	0.234697	-0.0907643	0.0789104	2.53451e-09
SERPIND1	0.098593	0.0837489	-0.942803	-0.0576573	-0.157148	0.147179	6.24066e-13
SERPINF2	0.0787683	0.00535485	-0.624672	0.0566482	0.0960321	0.0543028	8.4744e-08
SERPING1	0.546043	0.0964591	-0.474391	-0.0584241	-0.610745	0.0692795	1.9852e-22
SH3KBP1	0.282832	-0.0152526	-0.252292	0.0921681	-0.187847	0.0576416	2.5277e-06
SLC2A3	0.266601	-0.0443469	-0.149837	0.0520824	0.115048	-0.0531322	0.0218124
SMARCA2	0.178257	0.0518481	-0.357624	-0.17996	0.0166421	-0.0266075	0.0043378
STRAP	0.300282	-0.0185343	-0.209949	-0.155679	0.154312	-0.0551693	0.00331787
STX8	0.366498	-0.0281539	-0.187413	-0.0652414	-0.0849427	0.0296347	0.0277098
SYTL2	0.457232	0.0463174	-0.691645	-0.0788301	-0.153586	0.0228937	2.52592e-12
TAOK3	0.440194	0.0280864	-0.256333	0.109675	-0.212397	-0.0775819	8.73163e-05
TCN1	0.357468	-0.00521421	-0.0440636	-0.098016	-0.024741	-0.070047	1.57572e-06
TH	0.269383	0.0518146	-0.157679	-0.0379457	-0.0933509	-0.100363	0.000108286
THBS1	0.439368	-0.0712904	-0.238648	0.0611119	0.12423	-0.0510188	0.00056899
THOP1	0.291141	0.0172521	-0.0885517	-0.0562061	-0.107585	-0.0464561	1.50705e-10
THY1	0.411398	-0.056118	-0.0267799	-0.0530728	-0.0951546	0.0263736	1.8261e-10
TKT	0.487914	0.0928556	-0.497076	-0.461096	-0.15674	-0.00710597	1.44477e-11
TMSB4X	0.433991	-0.180548	-0.409019	0.453813	0.480654	-0.104471	2.20642e-15
TTC7B	0.408459	0.09144	-0.221245	0.0990342	0.252915	-0.43864	2.27524e-21
TUBA1A	0.448613	-0.0518481	-0.314285	0.0135567	0.126765	-0.058746	0.000334058
TUBA1B	0.380425	-0.0532592	-0.354254	-0.0417754	0.160574	-0.0199897	3.08171e-05
TUBA1C	0.452506	-0.0576995	-0.344867	-0.028854	0.193814	-0.0627493	3.71635e-05
TUBA4A	0.465778	-0.0621954	-0.433483	-0.132134	0.380214	-0.101292	1.34119e-07
TUBA4B	0.273545	-0.0569735	-0.300691	-0.102964	0.239376	-0.0082908	0.00439774
TUBA8	0.376265	-0.0749796	-0.206027	-0.0918329	0.257932	-0.0503634	0.00746513
UTRN	0.232777	0.0177333	-0.276468	-0.150897	0.0962674	-0.0534421	7.02881e-05
VCL	0.443658	-0.12128	-0.29482	-0.094661	0.386546	-0.0298156	1.40177e-11
VPS25	0.291689	-0.00407397	-0.0870866	0.0479408	-0.0728283	-0.0569458	0.00921964
VPS4A	0.245709	0.00801141	-0.230401	0.0911216	-0.190495	0.0226834	2.48568e-08
VSIG4	0.411006	-0.101465	-0.0391109	0.0583146	0.0898002	-0.0148858	6.27665e-05
VTN	0.141279	0.11142	-0.765327	0.00238824	-0.232048	0.0514786	9.70344e-11
VWF	0.40938	-0.0940245	-0.148232	-0.172682	0.0853126	0.075189	6.06036e-13
WDR1	0.336722	-0.111086	-0.198487	-0.0191052	0.3035	-0.0143488	0.000266785
WDR12	0.476139	-0.000565588	-0.160864	-0.23061	0.0651069	-0.0989153	2.33276e-07
XPO7	0.329294	-0.034975	-0.0428341	0.0118171	-0.0463764	-0.0253944	1.28592e-05
YTHDC2	0.294018	-0.00259845	-0.0607041	0.0238315	-0.0515418	-0.0711364	7.43037e-12
ZYX	0.407584	-0.0356583	-0.38224	-0.192966	0.176886	-0.0178507	0.000146735
A1CF	0.192177	0.0014422	-0.0526979	-0.115149	-0.0697868	0.01113	0.000118708
AARS2	0.0775338	0.0211064	0.0224487	-0.100754	-0.0480015	-0.0190612	0.00418106
AARSD1	-0.0652726	0.0432944	-0.17286	-0.217757	-0.0571412	0.0849053	0.0370832
ABCD1	0.0215647	0.00460434	-0.143525	-0.217926	-0.15485	0.170654	0.00248663
ABHD10	0.111349	-0.0319399	-0.0284323	-0.0521154	-0.0154077	0.051605	0.00717055
ABHD11	-0.0894984	-0.0398196	-0.0482384	0.187265	-0.105512	0.119917	5.78319e-06
ABHD12	-0.00997742	0.0123309	-0.0431932	-0.130098	-0.0911489	0.0802257	0.00106809
ACADM	-0.0589469	0.0429889	-0.0174786	-0.134457	-0.0727026	0.024403	1.16674e-10
ACADVL	-0.0517179	0.0214474	-0.101329	-0.0529165	-0.133769	0.0915735	0.00690075
ACAT1	-0.222303	0.0533935	-0.0230605	-0.0109669	-0.167711	0.0785896	0.000165582
ACSL1	0.091013	0.0306321	-0.194523	0.0517872	-0.216695	0.0544229	0.00142139
ACSL3	0.0836598	-0.0104596	0.211652	-0.147628	-0.0761975	0.0200371	0.00705247
ADGRB3	-0.37136	0.0700932	0.0909404	0.0520532	-0.120116	0.0281183	6.5932e-05
ADGRL1	0.0278465	0.0399879	-0.223591	0.167003	-0.128674	-0.0148495	0.0362328
ADIPOQ	-0.281172	-0.00764208	0.124058	0.12173	-0.0936835	0.0998846	0.00675283
ADPRS	-0.0482702	0.0736976	-0.133864	-0.0736377	-0.162397	0.0191575	0.000736702
ADSS2	-0.0245002	0.017868	0.124377	-0.0924964	-0.0807792	0.0139573	3.42891e-11
AGFG1	-0.0565945	-0.0577023	-0.00641072	0.0332667	-0.047165	0.149177	1.24342e-33
AGMAT	-0.0795376	-0.0630001	-0.0918676	-0.124072	0.00924539	0.210534	0.0418118
AGO3	-0.0822666	-0.0337622	0.0327895	-0.129019	-0.163081	0.214578	2.35737e-05
AGTRAP	0.054985	-0.0341094	-0.114666	-0.166842	-0.063574	0.161287	4.60658e-23
AIP	-0.0550133	-0.0512638	-0.0422006	-0.0668331	-0.0385446	0.172565	0.00134048
AK4	-0.0564953	0.0393127	-0.059892	-0.071044	-0.0224912	-0.00479026	6.9343e-14
AK5	-0.0927796	-0.0642115	0.0677822	0.124193	-0.0894156	0.149619	2.62016e-10
AKAP12	-0.181135	0.126399	-0.038178	0.126996	-0.349757	-0.0224051	4.9971e-05
AKR1C2	0.0709961	-0.0655728	-0.182936	0.0620428	-0.201438	0.234058	5.77176e-08
AKR1C3	0.186573	0.0569241	-0.178625	0.0134615	-0.268222	0.00230072	0.0206333
ALCAM	0.0596704	-0.0334535	-0.123067	0.199954	-0.1437	0.0865695	0.0228976
ALDH5A1	-0.0924463	-0.048231	0.0393461	0.0321411	0.0454295	0.0841809	0.00465196
ALDH7A1	-0.155272	0.0132134	0.108019	-0.25062	0.0724797	0.0462928	0.000338163
ALG2	0.0176643	0.0211048	-0.0519208	0.100471	-0.0903966	-0.0182818	1.05561e-08
AMDHD2	-0.0603798	0.021746	-0.116294	-0.221254	-0.0330993	0.0984933	1.18105e-07
ANGPTL3	0.0581516	0.0489071	-0.332037	-0.0262688	-0.163964	0.0643326	0.00635405
ANGPTL6	-0.0490846	-0.0514622	-0.119511	0.151503	-0.112936	0.160935	4.86126e-05
ANP32D	-0.0152646	0.0173759	-0.011158	0.122053	-0.0750039	-0.0241151	0.000108877
ANXA4	-0.224978	-0.00164701	-0.0947987	0.123411	-0.156625	0.1566	0.00892831
AOC1	-0.127952	0.0509272	-0.0526623	-0.0785288	-0.188938	0.0878098	0.00635736
AOX1	-0.0481113	-0.0160765	-0.0108844	-0.0476075	-0.0353126	0.0858486	0.00627188
AP1B1	-0.19093	0.09751	-0.0991633	-0.0202615	-0.244671	0.0444911	0.00256664
APLP1	-0.0266365	0.0631965	-0.0248815	-0.128895	-0.121098	-0.00138108	0.00506563
APOB	-0.162587	0.0842979	-0.376551	0.0314594	-0.233067	0.109233	6.45786e-05
APOC4	-0.147446	0.0856069	-0.364395	-0.00358371	-0.116928	0.0478085	0.00698423
APOL2	-0.0438439	-0.0550037	-0.0382373	-0.162044	-0.0408429	0.20585	1.45631e-08
APOOL	-0.066399	-0.0631071	-0.113489	-0.194786	-0.0563773	0.268254	2.73458e-19
ARG1	-0.13885	0.133003	-0.158349	-0.097004	-0.410859	0.083058	5.65376e-10
ARHGAP17	-0.0335575	0.0145579	-0.0539015	0.042674	-0.128905	0.0528698	5.77176e-08
ARHGAP35	-0.121847	-0.0811455	-0.0831885	-0.095411	0.0545244	0.226602	3.75473e-34
ARHGEF10L	-0.12417	-0.080441	-0.063312	0.0564357	-0.0758915	0.241477	3.15157e-20
ARHGEF12	-0.0732523	0.227788	-0.277797	-0.111082	-0.374169	-0.109084	1.3965e-18
ARHGEF6	-0.057944	-0.104	-0.00136508	0.166428	-0.00074098	0.171529	3.64013e-25
ARPC1B	-0.202378	0.0857633	-0.087262	-0.0805731	-0.228923	0.0792733	6.40882e-06
ART4	0.0107705	0.0409908	-0.122067	-0.0359368	-0.156835	0.0421777	5.59987e-10
ASL	-0.259357	-0.0458783	0.204825	0.147209	-0.218218	0.202001	0.000705525
ATAD1	0.0442879	0.0338567	-0.0906317	0.00181588	-0.0535799	-0.0311419	1.74673e-06
ATP1B3	-0.0353636	0.0363703	-0.0334389	-0.0473615	-0.0152338	-0.0253144	0.00172562
ATP2A1	0.03274	0.0573644	-0.2098	-0.182952	0.012617	-0.0175759	0.00065295
ATP2B1	-0.131614	-0.0652262	0.274851	-0.128051	0.0361348	0.126062	3.64821e-10
ATP2B2	0.08377	-0.0741567	-0.0275128	-0.104686	-0.099302	0.204319	6.97204e-07
ATP2B4	-0.0352034	-0.06074	0.095005	-0.0902453	-0.00246282	0.136043	5.62093e-09
ATP4A	-0.0153079	0.123737	-0.119707	-0.183483	-0.17534	-0.0524188	0.0255373
ATP5F1A	-0.0542298	-0.019572	-0.132169	-0.201834	0.102566	0.102865	0.0135477
ATP5F1B	0.168079	0.0770757	-0.0678946	-0.142036	-0.246635	-0.0207758	1.05725e-05
ATP5MF	-0.0523592	0.00675817	-0.0421081	-0.0268931	0.0215753	0.0149251	0.00115918
ATP5MPL	-0.0180758	0.132054	-0.138216	-0.152224	-0.337798	0.0128711	0.00867317
ATP5PB	-0.0654415	0.0425643	0.0273786	-0.0939635	-0.0337304	-0.0173039	4.23148e-05
ATP6V0A1	0.0511896	0.0962629	-0.0755249	-0.110167	-0.312195	0.0127944	6.14736e-05
ATP6V1E1	0.0444986	-0.0243908	-0.22923	0.0460925	-0.0469309	0.10025	0.000454275
ATRX	-0.00466704	-0.0190481	0.0492474	-0.0516293	-0.0386169	0.0624413	0.00658185
B3GALT6	-0.112238	-0.0551249	0.101934	-0.151022	0.0425864	0.148127	1.26527e-12
B4GALT1	0.151993	-0.00844137	-0.104491	-0.122301	-0.245708	0.153773	6.26603e-06
B4GAT1	0.0862709	-0.0199987	-0.0593414	0.182832	-0.30957	0.126404	0.000189488
BAG2	-0.0703383	-0.031722	-0.168667	0.0639234	0.0672019	0.0765872	0.0320588
BCAR1	-0.0124568	0.025547	-0.0811198	-0.160513	-0.218543	0.142051	2.35695e-09
BCAT2	-0.089168	-0.102389	-0.147874	0.0968171	0.0100723	0.234803	1.2246e-09
BHMT	0.010125	0.0591278	-0.299469	-0.132758	0.0258663	-0.0118549	0.000187384
BHMT2	-0.0322014	0.0959765	-0.134925	-0.149282	-0.202411	0.0151429	0.00228152
BLM	-0.129317	-0.0786575	0.0116878	-0.0265164	0.065331	0.172401	3.80709e-09
BPIFB1	-0.0844309	-0.0223561	0.0635225	-0.0539522	-0.0667981	0.11094	3.03716e-33
BUB3	0.16353	0.0663095	0.0073164	-0.0518184	-0.24849	-0.0453704	0.00422002
BUD31	-0.0165942	0.0426869	-0.102619	-0.0433472	-0.150327	0.0431249	1.68908e-05
C16orf58	0.0883372	-0.00952816	-0.218991	0.0940949	-0.237872	0.137356	0.00320031
C1QB	-0.14207	0.0618215	-0.328999	-0.178013	0.0800837	0.0341896	0.0334423
C2CD2	-0.102414	-0.0624463	0.101699	-0.0625823	-0.00166817	0.15394	0.01227
CADM1	-0.108979	0.0278984	0.032245	-0.084412	-0.118977	0.0681445	0.0421582
CADM4	0.129705	0.00262306	-0.0632076	0.0464588	-0.0962688	-0.00189033	0.000781434
CALCOCO2	-0.0748792	-0.00303841	-0.0748124	0.00867315	-0.00369088	0.0530114	0.000176336
CALU	0.0310119	0.018783	-0.0562992	-0.0242005	-0.136687	0.0460487	0.025849
CAND1	0.116555	0.020234	-0.0963689	-0.0117499	-0.124631	0.010958	0.0374633
CARMIL1	-0.0127246	0.0269482	-0.0401938	-0.0319885	-0.0377808	-0.00690246	0.0290663
CBR3	-0.0632788	-0.00777894	0.125204	-0.0383542	-0.160684	0.103013	2.54485e-05
CBR4	-0.0815312	0.00260902	-0.0631219	-0.0687869	-0.105828	0.119734	2.27994e-12
CBX3	-0.0452139	-0.0912086	-0.0316427	-0.0947857	0.0173021	0.222936	3.66432e-27
CCDC124	-0.0969376	-0.00745448	-0.0536096	-0.00997435	-0.0448303	0.0919262	0.00215581
CCDC6	-0.104691	0.0140761	-0.0347637	-0.123708	0.00216203	0.0595122	1.07614e-08
CCNK	-0.286923	0.0464545	-0.1418	0.182792	-0.294708	0.153018	1.85275e-08
CCNT1	-0.142571	-0.000686786	-0.103783	0.0562151	-0.0204197	0.0754612	0.000266861
CCT2	0.0795474	0.0144725	-0.287311	-0.272192	0.0361151	0.0838202	0.0181093
CCT6A	0.273646	0.0954181	-0.0946647	-0.134197	-0.221196	-0.105226	0.0190067
CCT6B	-0.138711	-0.0351769	-0.0434019	-0.18204	-0.0400888	0.210721	1.75769e-23
CD109	-0.0231148	-0.0140711	0.0589726	-0.00276934	-0.133475	0.0916814	0.000983992
CD163	-0.0011304	0.0560848	-0.00507526	-0.0727543	-0.183019	0.012347	0.0324993
CD2AP	0.237889	-0.0512331	-0.117442	-0.0199375	-0.00670816	0.049428	2.03703e-05
CD44	0.2808	0.156168	-0.0517472	-0.117718	-0.394036	-0.151144	3.04151e-14
CD58	-0.0549484	-0.0339564	0.0169033	-0.11169	0.0105398	0.111982	0.00422946
CD63	0.0080367	-0.0324682	-0.0340433	-0.0746168	-0.209033	0.202196	3.08139e-07
CD9	0.101447	0.0483677	-0.102348	-0.00660371	-0.14748	-0.0258536	0.00181819
CDC23	-0.0427076	-0.0287876	-0.0407759	-0.0337353	-0.0333073	0.110774	5.05249e-08
CDC73	-0.210788	0.071561	-0.106651	-0.113962	-0.194033	0.107245	2.41415e-11
CDH5	0.0802057	0.0584643	-0.229333	-0.0986929	-0.178672	0.0412951	0.0486907
CDK6	0.00584805	-0.0541853	0.0653622	-0.191953	0.0174163	0.137215	3.65297e-24
CFAP410	-0.0280508	0.0407985	-0.014439	-0.0659448	-0.0406181	-0.0224018	0.00482447
CGNL1	-0.0264874	-0.0748758	-0.102969	-0.108335	-0.0680665	0.251966	3.41896e-09
CHDH	-0.0911348	0.0243752	0.0191133	-0.0400927	-0.0367159	0.0143647	0.00367137
CHGB	0.233713	-0.0839912	-0.0180552	-0.0043584	0.0534518	0.0519784	3.84563e-05
CHMP2A	-0.112746	0.0357322	0.021524	-0.0737781	-0.0396192	0.0121179	0.000307358
CHST3	-0.0255294	-0.0283564	-0.0571941	-0.0947443	0.0280373	0.0947464	0.00234228
CIAO1	-0.0224275	-0.0121103	-0.244581	0.171285	-0.401773	0.252816	1.37058e-09
CILP	0.0738991	-0.0378055	-0.0307913	4.59e-05	0.0407214	0.0317905	0.0149674
CILP2	-0.0430513	-0.0285092	0.0331309	0.134098	-0.118853	0.0829858	0.00133836
CKAP5	-0.145291	0.0350016	0.0239469	-0.152593	0.0462222	0.0050457	0.000917031
CLIP2	0.0196939	-0.0542836	-0.0791587	-0.147717	-0.0877988	0.211176	1.15684e-21
CLNS1A	0.103732	-0.0380321	-0.075353	-0.242418	-0.0729485	0.168958	0.00236669
CLPTM1L	-0.0436966	-0.0738171	0.0100314	-0.102168	-0.0801624	0.231376	2.01195e-35
CLPX	-0.0784258	0.0159489	-0.198451	0.0393935	-0.0674876	0.0736602	0.0127494
CLSTN1	0.0612348	-0.0320258	0.0989867	-0.1515	-0.0323602	0.077885	0.0109976
CLTCL1	-0.0823453	-0.0364722	0.00289875	-0.0975097	0.0357855	0.113148	6.03484e-11
CLUH	0.0683353	-0.0189726	-0.0705965	-0.107304	-0.160371	0.147468	0.0224879
CMBL	0.0359704	0.01022	-0.0322548	0.143802	-0.0807397	-0.0280552	0.0410107
CNDP1	-0.0466069	0.023873	-0.40143	0.158136	-0.0354539	0.0448036	0.011873
CNOT1	-0.173794	0.0409263	-0.138621	-0.0129935	0.0105504	0.0214054	0.021285
CNTFR	0.0750174	-0.0198879	-0.123731	-0.0105007	-0.0648197	0.0797264	3.44536e-06
COG2	-0.130943	-0.0780129	0.145123	0.134206	-0.0401942	0.141613	2.29355e-13
COL12A1	-0.00128526	0.0623294	-0.223683	0.00184273	-0.258711	0.0735423	0.00207936
COL1A2	-0.0545098	-0.0265227	-0.084744	-0.0730212	-0.0074367	0.121158	6.37579e-09
COL3A1	0.0365195	0.0080492	-0.0744883	-0.143693	0.00757965	0.0314372	0.011165
COL6A1	-0.185748	0.0775473	-0.230349	-0.156892	-0.281709	0.178084	7.64812e-09
COL6A6	-0.338522	0.0969597	0.101	-0.16481	-0.0976452	0.0177607	0.0001704
COLEC11	0.0830103	0.012225	-0.184836	0.108309	-0.236614	0.0831812	0.000274832
COMP	-0.367819	-0.0673707	0.0805478	0.0350574	0.115509	0.177228	1.70256e-05
COPB1	-0.0455743	-0.044879	-0.00734605	-0.0603591	0.0803898	0.0829547	2.31806e-06
COPG1	-0.0498158	0.0435756	-0.0569469	0.0242693	-0.0729482	-0.0199632	0.0092924
COPG2	0.100992	0.013888	-0.0747995	-0.0830733	-0.0886625	0.0271716	1.78238e-07
COPS2	-0.10421	0.0176481	-0.0748552	-0.0132939	-0.0804435	0.0713815	1.5956e-08
COQ3	-0.120791	0.0146363	0.034838	0.0487381	-0.113263	0.052529	0.00249818
CORO1B	0.0306353	0.000903385	-0.258789	0.127679	0.00120325	0.0131305	0.000559154
CPA2	-0.0105958	-0.0412481	0.00856757	-0.106067	-0.129045	0.18305	5.31871e-32
CPA3	-0.0778377	0.115433	-0.109418	0.0233367	-0.501066	0.0905409	4.33019e-14
CPS1	-0.115341	-0.0242528	-0.0904173	-0.0146522	0.100719	0.0660106	0.0189064
CRAT	-0.0757977	-0.0471427	0.14671	0.0862297	-0.00055159	0.0548168	0.0462776
CRISP3	0.0191156	-0.0321665	0.0583703	-0.163149	0.1057	0.0358416	2.06494e-08
CRKL	0.0166847	0.0466388	-0.0453526	-0.0942607	-0.0879447	-0.00879037	3.53261e-07
CSRP1	-0.00502693	-0.0536402	-0.0795999	6.48e-05	0.0575195	0.0963028	4.11129e-09
CST6	-0.0747588	-0.0389239	-0.0971452	0.0564655	-0.0952896	0.161334	0.00105976
CSTA	0.245645	0.00922411	-0.0625492	-0.0627761	-0.0915914	-0.026758	0.0343904
CSTF1	-0.0715638	-0.034316	0.202628	0.0724166	-0.274196	0.162001	1.98948e-06
CTBS	-0.311418	0.0363999	-0.0471058	0.0649348	-0.0423905	0.0617087	9.11933e-10
CTNNA2	-0.0576083	0.0592956	-0.0508263	-0.0742363	-0.053469	-0.0281409	0.00337036
CTNNBIP1	-0.119751	-0.0468742	-0.0583264	-0.106939	-0.0363875	0.204382	2.78969e-10
CTNNBL1	0.0641193	-0.0548309	0.181318	-0.0895963	0.0387829	0.042507	1.45101e-10
CTNND2	-0.0694422	-0.00125146	-0.121169	0.00451405	0.0668309	0.023823	0.0480453
CTPS1	0.0434683	-0.00018614	0.0425716	-0.0188225	-0.0206911	-0.0104101	1.81397e-13
CUL2	0.00193044	-0.0606094	0.181913	0.0245599	0.0219387	0.0498989	0.0341805
CUL4B	-0.020337	0.0426643	-0.0291272	-0.0342534	-0.053085	-0.0285778	0.00934387
CUX1	-0.0724777	0.048978	-0.0628807	-0.0734285	-0.0440154	-0.00459641	0.0002404
CXXC1	-0.0809729	-0.0534641	-0.0367798	-0.0696662	0.0274639	0.151458	6.47449e-06
CXorf38	-0.0775144	-0.0370565	-0.0511848	0.0834023	-0.097995	0.139678	0.0284995
CYB5A	0.172083	-0.0609369	-0.154395	0.0679934	-0.0301594	0.0873554	0.0264022
CYB5R1	0.0212403	0.0193393	0.148497	-0.161143	-0.139642	0.0401095	0.000633473
CYB5R2	-0.0471455	-0.0126621	-0.113403	0.0198421	-0.120526	0.129082	1.50194e-07
CYFIP1	0.265514	0.123499	-0.0199674	-0.0579182	-0.401434	-0.105382	0.000333398
DBH	-0.0187885	0.083471	-0.184571	-0.00459131	-0.191457	-0.00428599	0.0106352
DCAF7	-0.0279857	-0.0314855	-0.100536	0.0458742	-0.0846755	0.127833	4.621e-09
DCAKD	0.124292	-0.00179447	-0.0770579	-0.0134218	-0.141064	0.0548154	0.0147727
DCPS	-0.107126	0.0793418	-0.341229	0.075053	-0.190382	0.0523489	0.00191467
DDA1	0.131455	0.0157294	-0.12567	-0.233981	-0.293371	0.180648	0.00662397
DDX17	-0.0872174	0.0679706	-0.188943	0.0872837	-0.0647866	-0.0428007	0.0234982
DDX41	-0.115598	-0.00354553	0.0617179	-0.0427651	-0.176228	0.140794	5.75213e-11
DDX46	-0.0210485	-0.0266366	-0.0794044	-0.0525432	0.0343366	0.0788537	0.00495328
DDX52	-0.022452	0.0270702	-0.00190968	-0.0847357	-0.0449069	0.00699009	4.98611e-08
DDX58	-0.0449592	0.0266358	-0.0109138	-0.0438438	-0.0880005	0.0284444	2.66443e-05
DENND10	-0.0017084	-0.0299581	-0.0050403	-0.00840843	-0.0317331	0.0793253	5.69515e-09
DENND10P1	-0.0017084	-0.0299581	-0.0050403	-0.00840843	-0.0317331	0.0793253	5.69515e-09
DGLUCY	-0.185596	0.00820662	-0.235832	0.0688201	0.0470293	0.0695665	0.0374531
DLAT	-0.0527573	-0.00735481	0.0767041	-0.0932879	-0.11413	0.103749	8.04921e-09
DLG1	-0.107827	0.00605455	-0.0484118	-0.0118226	0.0476794	0.0204913	0.0246633
DMGDH	-0.0435457	0.0292991	-0.0576275	-0.0841559	-0.0722387	0.0393971	5.30705e-34
DNAJA1	-0.0288862	-0.0248334	-0.0271195	-0.000111841	-0.0225821	0.0780383	3.72791e-05
DNAJB11	0.112188	-0.00774514	-0.0926191	-0.0145959	-0.0652081	0.0354872	0.00652857
DNAJB12	-0.00466562	-0.00683134	-0.0637248	-0.0690785	0.081717	0.01051	0.00760027
DNAJC10	-0.0246904	0.0119283	-0.0430429	-0.0359895	-0.0679884	0.044616	8.31769e-21
DNAJC3	-0.0474753	-0.00486959	-0.0915764	-0.206265	-0.0875468	0.16258	0.000459426
DNTTIP2	0.201208	-0.0668712	0.00991927	-0.0215591	-0.043622	0.0803269	0.000102823
DOCK6	-0.137154	-0.0774849	0.0636381	0.0578183	0.0798787	0.125237	1.00197e-06
DOCK8	-0.155772	0.109526	-0.263833	-0.00658344	-0.271993	0.0608747	1.74803e-07
DOP1B	-0.103976	-0.0342067	0.0912103	-0.0709064	-0.09471	0.154119	1.15627e-64
DPYSL3	0.0133013	-0.067887	-0.0636292	-0.0297683	-0.0822418	0.195679	1.00334e-06
DSG1	-0.147148	0.00467125	0.0120855	-0.0417709	0.0843635	0.0124941	0.0139296
DSTN	-0.0282963	0.0400233	-0.0302628	-0.050755	-0.0447836	-0.0192924	0.0224353
DTX3L	-0.236073	0.0875535	-0.0721553	0.0996352	-0.146583	-0.0156175	0.00082097
DYNC1LI1	-0.0911042	0.0171362	0.0126962	-0.0377465	-0.162025	0.0951795	0.00373146
ECH1	-0.00450892	-0.0446802	-0.0833859	0.0783	-0.16979	0.174497	1.29501e-08
ECI2	-0.107915	-0.0673747	0.199077	-0.0299419	-0.075304	0.168558	1.20242e-13
EEF1A1	-0.0855992	0.0353166	-0.190303	-0.135392	-0.0596247	0.0878807	0.0266089
EEF1A1P5	-0.0857521	0.0353289	-0.190228	-0.135341	-0.0596479	0.0878917	0.0263927
EEF1A2	-0.0864835	0.0209643	-0.170215	-0.173258	-0.0472786	0.116256	0.00259274
EEF2	-0.151449	0.102187	-0.0443773	-0.159971	-0.245467	0.0507548	0.000520788
EFEMP1	0.173927	-0.033885	-0.132986	0.102682	-0.0998748	0.0543581	0.0445752
EFHD1	-0.0521415	-0.0463866	-0.0443791	-0.0403175	-0.0385417	0.154211	1.61325e-06
EHD1	0.0141013	-0.0194115	-0.439695	-0.0224518	0.0517858	0.126824	0.00188567
EIF3A	-0.0542995	0.0129755	-0.110327	-0.0624901	-0.157672	0.126901	0.0118978
EIF3F	-0.00509155	-0.0604405	-0.0702333	-0.0202941	0.00489893	0.141154	0.00470337
EIF3L	0.180554	-0.0368757	-0.0253513	-0.117251	0.0115224	0.0405404	0.0199808
EIF5	-0.122457	0.0923623	-0.174186	0.181188	-0.26158	-0.00676013	0.000178857
EIF5A	-0.0708499	0.0435329	-0.109322	0.0510871	-0.319191	0.122732	0.0135095
ELMOD2	-0.0577405	-0.0349619	0.063293	0.00414918	-0.0277163	0.0863692	2.20537e-07
ELOVL7	-0.0582536	-0.0573888	0.047478	-0.112923	-0.0340628	0.17448	0.000186221
EMC1	0.00554688	-0.0446654	-0.027063	-0.0566421	0.0956627	0.0590826	0.0320389
EMC2	-0.0375656	-0.0280434	-0.0350763	0.0352665	-0.0371604	0.0861013	0.000433732
ENPP6	-0.082574	0.0643444	-0.0943417	-0.0754429	-0.0227332	-0.0328702	7.16284e-05
ENPP7	0.0978731	0.0428931	-0.147683	0.114938	-0.154624	-0.0367443	3.23265e-05
EPS8	-0.123213	0.0224071	-0.0554019	0.00279287	-0.103775	0.0714787	0.0473633
ERLEC1	-0.284918	0.114713	-0.163812	0.00411855	-0.171006	0.0172679	1.70538e-07
ESD	0.0404697	0.173541	-0.421793	-0.142795	-0.375068	0.000892386	2.56378e-09
ETFDH	-0.0365474	-0.00213079	-0.0829093	-0.0328366	-0.0985929	0.101836	0.00592519
ETHE1	0.051887	-0.0251703	-0.0382089	-0.11215	-0.15476	0.155846	1.98353e-07
EWSR1	-0.15572	0.1239	-0.107034	-0.103753	-0.304805	0.0400848	3.01937e-05
EXOC1	0.0875896	0.0578208	-0.0197827	-0.154828	-0.121696	-0.0271276	0.00427884
F11	-0.16945	0.0445113	-0.0118773	-0.136313	-0.018855	0.034203	2.22206e-05
FABP3	-0.0241833	0.0364374	-0.199412	-0.00269088	-0.0382581	0.0115892	0.0075985
FAM83H	-0.0720288	-0.0863618	0.222969	-0.0584361	-0.0693641	0.191369	0.00900283
FAM98A	-0.0791016	-0.0173866	0.112153	-0.0720796	-0.0386699	0.0775516	0.00313375
FASN	-0.069991	0.0295654	-0.0282732	0.0197018	-0.12671	0.0370531	0.00654215
FBLN1	-0.0982027	0.0294469	-0.365638	-0.117726	-0.018944	0.122799	0.0127167
FBLN5	0.143096	-0.0355914	-0.0503022	-0.00830501	-0.0377502	0.0502279	1.67808e-07
FBP1	-0.00382699	0.0174272	-0.123516	-0.0450202	0.0167524	0.0053505	4.24553e-16
FBP2	-0.151002	0.00909199	-0.0255423	-0.0929602	0.00930865	0.0708525	0.00155568
FBXL18	-0.142717	-0.0180763	0.0295009	-0.0654394	-0.0480916	0.127441	2.88445e-27
FBXO6	-0.0322408	0.0409256	-0.0732221	-0.198935	0.00523276	0.0122256	3.10592e-05
FBXO7	0.0723944	0.0335481	-0.274885	-0.108192	-0.332326	0.188176	0.0102276
FCN2	-0.137247	0.0190615	0.180823	0.187148	-0.170828	-0.00138514	0.0470292
FCSK	-0.103406	-0.0886142	0.206478	-0.0385113	0.00267461	0.167769	9.81147e-07
FES	-0.0535044	-0.051228	-0.0055107	-0.0363939	-0.0347368	0.150725	1.79559e-23
FMNL2	-0.0449978	-0.0536123	-0.0285977	-0.0285827	-0.0304082	0.153392	9.93476e-43
FN1	-0.162771	0.00511994	-0.284195	-0.315848	0.124619	0.160347	1.25291e-05
FOXK1	-0.114517	-0.0429754	-0.0750244	-0.050453	0.0468527	0.137581	0.000955216
FREM2	-0.243995	0.0499964	0.0640665	0.0529991	-0.171471	0.0524214	1.33022e-05
FSCN1	0.242358	0.00366325	0.0435102	-0.0328041	-0.194844	0.00239348	0.00302731
FXR2	-0.0423504	-0.0836269	-0.0258404	-0.0442921	-0.0612118	0.23096	6.41833e-71
GALE	-0.221743	0.0335578	-0.102082	0.0647714	-0.184609	0.122343	0.0296362
GALM	-0.0612021	0.0129973	0.090887	-0.0834199	-0.013288	0.00770384	2.25009e-06
GAP43	-0.110941	0.00888286	-0.0403158	-0.0588643	-0.00248153	0.055327	3.65322e-07
GBP1	-0.114366	0.0165114	-0.0548941	-0.0594833	-0.0931305	0.0935041	1.40182e-06
GCNT3	-0.191697	-0.0233232	0.27268	-0.114949	-0.203888	0.190306	5.94216e-05
GGCT	-0.228086	0.0807036	-0.100768	0.123844	-0.267702	0.0580991	4.3494e-05
GGT2	0.164605	-0.0528724	-0.1067	-0.0870788	-0.161434	0.180176	0.00494071
GGT5	-0.0367493	-0.0322066	-0.0397113	-0.0219404	-0.0464517	0.118037	1.79582e-06
GIMAP4	-0.0860923	-0.0539906	-0.0362112	-0.0417144	0.107076	0.103582	7.46395e-05
GIPC2	-0.0799033	0.0151126	-0.053775	0.0256438	-0.0420628	0.0290812	7.53064e-07
GIT2	-0.0551693	0.0317449	-0.0606198	-0.0754093	-0.0165217	0.00779557	3.54342e-15
GLG1	-0.130526	0.0736047	-0.144625	-0.0692407	-0.161616	0.0515562	0.00406053
GLOD4	-0.232108	0.0768956	-0.0538394	-0.199172	-0.0634105	0.049503	0.0333903
GLUD1	-0.263965	0.0840988	-0.119141	-0.121024	0.0140574	-0.000759605	0.0295495
GMFB	-0.230303	0.0514492	-0.0240348	0.0420253	-0.202709	0.0872869	0.000383711
GMFG	-0.0556171	0.0619888	0.0362391	0.0539954	-0.173288	-0.0343847	0.000106325
GNAZ	0.00846799	-0.00745982	0.13534	-0.163262	-0.0498175	0.0537418	0.0285837
GNPTG	-0.0355854	0.043846	-0.0554365	0.0318448	-0.065934	-0.0323631	0.0156271
GOLGA4	-0.102178	0.0470437	-0.0852182	0.0477983	-0.0743936	-0.00611645	0.0138808
GOLGA5	-0.137543	0.00979329	-0.0954602	-0.0318852	0.0325408	0.0511014	0.00411739
GOLM1	0.0856341	0.0310567	-0.0469055	0.0204386	-0.148478	-0.00881571	0.00113834
GOSR2	-0.0997929	0.025828	-0.250138	0.227963	-0.218923	0.0960996	0.00283225
GPS1	0.167923	0.0301674	-0.051305	-0.101705	-0.189687	0.0231158	0.00956017
GPT	0.0937358	-0.0668145	0.019204	-0.125085	-0.0843347	0.172713	4.23808e-10
GPX1	-0.0842493	0.101387	0.0119216	-0.144227	-0.143237	-0.0466007	0.0432167
GPX2	-0.0937544	-0.0401592	0.12431	-0.01209	-0.0054883	0.0876328	4.87955e-10
GRK2	0.0320792	0.0509862	0.046989	0.055599	-0.179001	-0.0466598	0.0373156
GRN	-0.00800394	0.00212308	-0.0401741	-0.0605276	-0.0288221	0.0436961	6.18853e-05
GSPT2	-0.114722	0.0524798	-0.135385	-0.134228	0.0238152	0.00713215	0.000933435
GSTA5	-0.137113	0.0196743	-0.0326366	-0.0208106	-0.0139485	0.0363497	0.00490194
GSTM4	-0.124657	0.0675726	-0.0354311	-0.179804	-0.0510325	0.00935392	0.00476513
GTF2B	0.0478996	-0.00967352	-0.00859017	-0.0464142	-0.103524	0.071899	0.000499226
GUCA2A	0.0125116	-0.0308295	-0.0384864	0.154627	-0.0173893	0.0252493	0.00094898
GUCY1B1	-0.0696072	0.046832	-0.0492904	-0.0676798	-0.0137493	-0.0228031	0.0389642
HARS1	-0.110314	0.00911808	-0.0105588	0.00779462	-0.184911	0.121694	0.0150369
HCLS1	-0.075858	-0.0868095	0.0320983	0.0500906	0.0487816	0.147057	7.75952e-11
HDAC6	-0.0490371	0.0204353	-0.078216	0.184368	-0.257214	0.0763499	0.000269003
HDGFL2	0.0271847	-0.0299614	-0.0802044	-0.0878677	-0.0306133	0.112513	4.35373e-09
HECTD3	-0.0386387	0.0726481	-0.0940774	-0.0336704	-0.0831908	-0.0471192	0.0121579
HERC6	0.0120093	-0.0366929	-0.0115629	0.0823328	-0.213198	0.155567	0.00317284
HEXA	0.128046	0.0750156	-0.159795	-0.00824888	-0.168212	-0.0611521	0.0285837
HK1	0.016205	0.0499444	-0.0619787	0.0111781	-0.243751	0.0378926	0.00381125
HK2	-0.0506286	0.0474961	-0.0773339	0.15197	-0.240292	0.0256621	0.0043137
HMGB1	-0.128821	-0.120726	-0.100568	0.170524	0.100704	0.202073	0.000234838
HMGB3	-0.101634	-0.00398133	-0.122899	0.0145099	-0.0479707	0.098966	0.0098854
HMGCS2	-0.312882	-0.0653766	-0.042357	-0.0357141	0.140956	0.193584	0.00109498
HMOX2	-0.0482787	0.0566712	-0.0838797	-0.0905656	-0.0367305	-0.0216115	0.000289848
HNRNPD	-0.0820051	0.00539195	0.0253698	-0.241946	-0.0690084	0.126837	0.00604839
HNRNPH1	-0.0715752	0.0584495	0.00295775	-0.138335	-0.0384737	-0.0228477	0.00121589
HNRNPH2	-0.000783254	-0.0350193	-0.145961	-0.094513	0.0894964	0.089036	3.80536e-05
HOOK1	0.0312737	-0.0293972	-0.24421	0.0493693	0.0577631	0.0627992	0.047442
HOOK3	0.0395585	0.0466958	-0.0299962	-0.107065	-0.0763285	-0.023644	0.00179685
HPN	-0.00785303	0.058375	-0.117922	0.0144714	-0.0681585	-0.0480618	0.0111255
HSD17B8	0.0777077	-0.0427037	0.0225469	0.0978588	-0.122244	0.0806585	0.000158176
HSP90AA1	0.143784	0.107594	-0.059948	-0.051403	-0.464932	0.0133607	5.6113e-09
HSPA13	0.0364064	0.0516185	-0.130207	0.0419357	-0.190777	0.00720965	0.00568008
HSPA1A	-0.0618564	0.0736668	-0.147916	0.11597	-0.294092	0.0373146	0.0269
HSPA1B	-0.0618564	0.0736668	-0.147916	0.11597	-0.294092	0.0373146	0.0269
HSPA4	-0.0374776	0.0851999	-0.141586	0.0987063	-0.297779	0.0114733	0.000100348
HSPH1	-0.318205	0.00238078	-0.017527	-0.0243138	0.0690545	0.09209	0.00120354
IARS1	0.0275505	0.0866607	-0.169439	0.104771	-0.305917	-0.00640433	7.73445e-05
ICAM3	0.00570783	-0.0572958	0.0506427	0.135604	0.0298655	0.0370125	0.0352774
IDE	-0.050619	-0.00842588	-0.0192888	-0.0182581	-0.0659723	0.0810123	9.97521e-35
IFI30	-0.130094	0.00953241	-0.0786589	-0.0545577	0.016205	0.060154	0.00133125
IGF2R	-0.16097	0.0679613	-0.0792479	-0.0836089	-0.138852	0.0495592	0.00638162
IGFBP1	-0.0137618	-0.0319793	-0.0186053	-0.0393659	-0.026417	0.0983465	0.00268139
IGFBP6	-0.139671	-0.0221786	-0.0786323	-0.100222	0.101161	0.0949762	0.00381652
IGHM	-0.345903	0.0899072	-0.00562271	-0.0235641	-0.249982	0.0974543	1.68714e-06
IMPA1	-0.216615	0.0341908	0.00229535	-0.0392814	-0.110364	0.0858141	1.20146e-12
INA	-0.0872007	-0.0021666	-0.0205237	0.0389711	-0.103144	0.0845374	2.18965e-07
INHBC	-0.0860483	-0.0464978	-0.0201464	-0.18427	0.0759534	0.1463	0.00101207
INTS1	0.059719	0.00598706	-0.0378161	-0.122499	-0.11023	0.0722912	0.00358362
ISCA2	0.10722	-0.0852449	0.0815903	0.0203111	-0.117839	0.158655	0.0386339
ISOC1	-0.177611	0.106319	-0.187053	-0.157819	-0.252864	0.0931076	0.000725008
ITGA7	-0.0497756	-0.0520918	-0.0377148	0.0280261	-0.0100887	0.126057	3.53381e-13
ITGAL	-0.14131	-0.018931	-0.0529791	-0.0211557	-0.120501	0.174141	0.00455398
ITGAV	-0.125226	0.0498658	0.0248817	0.00717278	-0.130172	0.01061	0.00219757
ITPR1	0.0232959	-0.00873246	-0.123432	-0.000904193	-0.0230955	0.0526998	1.90432e-10
ITPR2	-0.0790805	-0.014826	0.0427369	-0.102874	0.0762809	0.0400017	1.63313e-05
IVD	-0.144705	0.057437	-0.126731	0.155096	-0.276196	0.0728781	5.37762e-05
JCHAIN	-0.207639	0.0401301	0.0657471	0.268158	-0.265617	0.0387539	4.98157e-06
KHDRBS1	-0.0831975	-0.0400452	0.02203	-0.0668754	-0.0484607	0.150002	0.0211484
KHDRBS2	0.00928707	-0.0729712	-0.0549698	0.0598161	0.0448683	0.109643	3.14239e-10
KIF1A	-0.0433027	0.0301753	-0.077851	0.00257216	-0.0948785	0.0273613	1.94097e-26
KIF1B	0.0281448	0.00556116	-0.0588919	-0.0389783	-0.0461434	0.0304954	0.00390257
KIF2A	-0.154791	0.00352177	0.0714659	-0.0325083	-0.135318	0.114685	0.0424366
KIF5C	-0.110428	-0.00178206	-0.217793	-0.135698	0.0611548	0.112928	0.0225722
KRT13	0.0986026	0.112558	-0.185902	-0.0577262	-0.265841	-0.0489129	0.00082588
KRT14	-0.393084	0.0828865	0.0693492	0.0258122	-0.170111	0.0517958	3.65184e-05
KRT3	0.127466	0.105352	-0.0815796	-0.080489	-0.367982	-0.0122296	1.06274e-11
KRT6B	0.0542314	-0.0147583	-0.156371	0.0981786	-0.0523689	0.045283	0.0174858
KRT7	0.0331622	0.0367415	-0.217533	-0.0206034	-0.101439	0.0328453	0.00815399
KRT73	-0.231922	0.13558	-0.0661334	-0.0763735	-0.243362	-0.00524805	0.00154552
KRT76	0.12743	0.10504	-0.0778848	-0.0959814	-0.331382	-0.0269175	3.59867e-11
KRT79	0.110463	0.0954649	-0.100451	-0.0710421	-0.321326	-0.00922078	1.12447e-07
L3HYPDH	-0.114503	-0.0100149	-0.0347855	-0.0205173	0.0533751	0.0503475	2.53472e-18
LAMA5	0.0152585	0.0895184	-0.0867304	-0.113054	-0.130954	-0.0519504	0.0217067
LANCL1	-0.108059	0.0215692	0.100448	0.145825	-0.289713	0.0792135	0.000201805
LAS1L	-0.0586519	-0.0675855	-0.139924	-0.142545	-0.0665478	0.269711	1.25765e-07
LCN1P1	0.0937237	-0.00470335	-0.182634	-0.153756	0.0737525	0.0310372	0.0436397
LGALS7	-0.182745	-0.0230076	-0.0860059	0.100694	0.00312294	0.102857	0.0122416
LGALS9	-0.113233	-0.0144028	0.063168	-0.0237388	-0.0412114	0.0835526	8.22137e-05
LMAN1	0.00210543	0.134647	-0.084895	-0.227645	-0.414109	0.050245	2.82898e-08
LMNB2	-0.0438336	0.0243903	0.192565	-0.139123	-0.142198	0.0379035	0.019515
LPA	-0.0818274	0.102523	-0.289203	-0.161674	-0.0587574	-0.0100592	0.0117673
LPCAT3	-0.0745061	-0.0422988	-0.0299507	-0.127476	0.0237011	0.145856	6.22587e-06
LRRC40	-0.0699359	-0.0543327	0.0172175	-0.0254569	-0.0718961	0.173119	1.94312e-16
LRRC47	-0.00275452	-0.0230617	-0.207387	-0.0806606	0.102702	0.0713271	0.00115605
LTBP2	-0.0391863	0.0435503	-0.040817	-0.0701149	-0.083341	0.00715288	2.94954e-05
LZIC	-0.00316406	0.0210775	-0.0246448	-0.129886	-0.130978	0.0767322	0.000963226
M6PR	-0.0972265	0.0355708	0.0252384	-0.0571948	-0.0273207	-0.00613616	0.000464726
MACO1	0.0175112	-0.0416765	-0.1123	-0.0940837	-0.0548873	0.161972	2.68963e-12
MADCAM1	0.171516	0.0838904	-0.127533	-0.275324	-0.102457	-0.0533671	0.00137437
MAN2C1	-0.0683186	-0.0284884	0.0440938	0.0628123	0.0296758	0.0341338	1.98637e-06
MAP2K1	0.202043	-0.083153	0.0869474	-0.0287485	-0.188072	0.169659	2.83935e-10
MAP2K2	0.112636	-0.0657028	0.0795764	-0.0798302	0.00458353	0.0865853	6.25494e-18
MAP2K3	-0.0249269	0.0780747	-0.115748	-0.139395	-0.0799869	-0.0254323	0.0210687
MAPK4	-0.0685632	-0.0507018	0.087806	-0.0493914	0.0464085	0.0925286	2.47617e-11
MAPK6	-0.126595	-0.0608075	0.116306	-0.0449695	0.072814	0.111407	2.85658e-11
MARCHF5	-0.0398215	-0.00771654	0.105593	-0.116033	-0.061972	0.0717774	1.6297e-27
MAST1	-0.23017	-0.0365795	-0.0389375	-0.0665237	0.056738	0.159549	0.0140483
MAST4	-0.195542	-0.0728329	0.0264928	-0.00708281	0.0310087	0.194285	0.0268159
MCCC1	-0.0678232	-0.0835802	0.0218518	-0.00318511	0.00997325	0.177674	5.1851e-18
MCCC2	0.1546	0.0130078	-0.109259	0.128595	-0.172578	-0.00529282	0.0272426
MDH2	-0.0350179	0.0388719	0.025978	0.165975	-0.184353	-0.0243441	0.000775441
ME2	-0.27305	0.01453	0.0278124	0.100474	0.0339647	0.018586	0.0293347
MEAK7	-0.032518	-0.0645164	0.0319705	-0.0888334	-0.104767	0.212116	9.48019e-14
MED30	-0.314861	0.17853	-0.0318461	-0.126115	-0.459522	0.0634553	1.43006e-12
METAP1	-0.0815849	0.0408843	-0.208638	0.015491	-0.303798	0.161007	5.52505e-05
MFAP4	-0.0515338	-0.0165688	-0.0268164	-0.0599024	-0.04629	0.101915	1.62706e-11
MGP	-0.0634799	-0.0355658	-0.0440105	-0.0577604	0.0504209	0.0962088	8.77511e-05
MICAL1	-0.0192215	-0.0441146	-0.0904063	-0.0537505	-0.0884361	0.179803	1.04066e-22
MMP19	-0.100738	-0.0145831	0.0561417	-0.081331	-0.0471439	0.102323	2.84526e-06
MMP9	0.284796	-0.00798304	-0.022816	-0.031052	-0.213323	0.0353091	5.27294e-05
MORF4L2	-0.0351402	0.000166802	0.0530628	-0.113291	-0.0100566	0.0402783	2.27683e-10
MPI	-0.0849002	0.108643	-0.0409446	0.0627149	-0.281862	-0.039178	3.99889e-07
MPO	0.135019	-0.0279769	-0.137172	0.101613	0.0208746	-0.00436816	0.0225717
MPP1	0.066604	-0.0255286	-0.104609	-0.212455	-0.0807076	0.161066	1.79602e-05
MPP3	0.0568405	0.072935	-0.174215	-0.196552	-0.0601843	-0.0235888	0.0192815
MPRIP	-0.0616321	0.00555536	-0.0404445	-0.101255	-0.0756798	0.094979	1.91244e-23
MRGPRF	0.120602	0.0558323	-0.160011	0.00867562	-0.198049	-0.010784	0.039639
MROH1	-0.031586	-0.0277631	-0.0726739	-0.0585907	0.017394	0.0940968	1.0381e-05
MRPL50	0.0124006	-0.0230119	-0.122241	0.101806	-0.0719468	0.0773821	8.26863e-26
MRPS9	-0.0539227	-0.051864	-0.112464	0.0393071	0.0429023	0.115265	0.00458687
MSH3	-0.021356	0.00861413	-0.0145137	-0.0414847	-0.0569574	0.0382659	0.00641368
MSI2	0.0577686	-0.0159109	-0.0674577	-0.109684	0.068455	0.0251895	7.24e-06
MST1L	0.0755452	0.104425	-0.445202	0.194684	-0.533896	0.104333	2.94687e-13
MTA2	-0.0383384	0.0044026	-0.0435356	0.00783942	-0.0185067	0.0246276	0.0370832
MX1	-0.191451	0.060861	-0.10916	0.0275319	-0.171702	0.0648056	0.0119033
MYCBP2	0.020114	0.0193706	0.0927089	-0.170623	-0.155178	0.0661945	0.0010528
MYH1	-0.0546817	-0.00668837	0.213426	0.0596172	-0.11209	0.0180999	0.000109986
MYH14	0.0931039	0.0412566	-0.0588363	-0.248992	-0.0204493	-0.0104008	0.00428984
MYH2	-0.0475068	0.0373918	-0.118208	0.0758395	-0.192508	0.0536634	2.67642e-05
MYH3	-0.0702601	0.0168028	-0.0940769	0.10605	-0.112019	0.0440125	0.00103304
MYH4	-0.00730342	0.0459468	-0.125006	0.0299609	-0.198768	0.0414107	1.83839e-05
MYH6	0.234632	0.00507943	-0.135561	0.00121666	-0.193809	0.0379947	1.18746e-06
MYH7	0.149839	0.0354774	-0.189795	0.0587117	-0.283924	0.0546359	5.68086e-06
MYH7B	-0.0674379	0.0710323	-0.0791671	0.0191908	-0.298715	0.0596325	4.79036e-06
MYH8	0.147279	0.0391294	-0.159111	0.0234356	-0.281056	0.0501767	1.10021e-06
MYO1E	0.0539698	0.0656153	-0.116189	0.0451845	-0.292444	0.0221983	0.0011956
MYO5B	-0.0423369	0.0319469	0.0204831	-0.0496496	-0.0323051	-0.0184703	0.00448337
MZB1	0.140042	-0.0778965	-0.0467036	-0.0285912	-0.0254831	0.132349	1.13777e-11
NAA15	-0.0713142	0.00390506	0.0867176	-0.0214895	-0.0432425	0.0264021	0.005434
NAGLU	-0.237453	0.0526509	-0.0828834	0.0604822	-0.0723817	0.028676	3.67164e-06
NAPB	-0.253799	-0.0266571	0.130939	-0.00601572	-0.0689402	0.151917	0.0477223
NAXE	-0.13748	-0.0508577	-0.0260968	0.0822886	0.0385563	0.111184	4.93255e-09
NBL1	-0.00422372	-0.0519706	-0.0654348	-0.250755	-0.063242	0.231863	5.51398e-17
NCAM2	0.0342522	-0.0619027	-0.0752515	-0.0835184	-0.00797591	0.157126	0.013265
NCKAP1L	-0.13763	-0.0144393	-0.0426517	-0.146376	-0.102846	0.191665	8.18141e-12
NDUFA13	0.0382012	0.0820772	-0.15313	-0.0916452	-0.278421	0.0418304	3.75162e-07
NDUFA4	-0.244879	0.0104686	0.0694428	0.138787	0.02903	-0.00461828	8.96944e-05
NDUFA9	-0.141696	-0.0902304	0.0720929	-0.0330527	0.0206964	0.209285	0.00120354
NEBL	-0.0319669	-0.0449249	-0.0146816	0.0220096	-0.274162	0.240134	0.00015473
NECTIN3	0.0946202	-0.0555581	-0.0937125	-0.0347567	-0.0505985	0.133735	0.00329739
NEDD4L	-0.109601	-0.109954	-0.030381	0.148786	0.0309102	0.199171	3.29442e-16
NEFL	-0.0554921	-0.00596805	0.0344575	0.15054	-0.0892875	0.0229621	2.039e-20
NEK7	-0.031177	-0.0281183	-0.109582	-0.173572	-0.0615137	0.182096	3.75953e-06
NELFA	-0.0998386	-0.0192094	-0.182499	-0.154129	0.0990351	0.11937	4.69666e-05
NENF	-0.0787792	-0.0263749	-0.174295	0.196586	-0.0605072	0.0960889	9.27359e-10
NFATC2	-0.0806972	-0.0897767	-0.0201595	0.00482953	-0.0410269	0.229795	6.50057e-13
NHLRC2	0.234551	0.0487451	-0.128224	-0.290364	-0.0792306	-0.0164918	0.000610545
NIBAN1	-0.272881	0.0403424	-0.134449	0.037486	0.0507791	0.0219364	0.000361504
NIPSNAP2	-0.182264	-0.0398321	-0.0847635	-0.00925313	-0.0757161	0.211146	2.6947e-24
NIPSNAP3A	0.034165	0.0493736	-0.110345	-0.108626	-0.170126	0.0439786	1.85083e-05
NLN	0.00399434	0.0245634	0.00989732	-0.117005	-0.0785829	0.0266371	1.27662e-08
NME3	0.161597	-0.0405052	-0.0565024	0.0184613	-0.0615103	0.0583691	0.0074321
NOP58	-0.0544153	0.03209	-0.00899838	0.0513212	-0.127771	0.0117843	0.0145207
NOS1	-0.0378747	-0.0427563	-0.0266591	-0.132026	-0.137141	0.217976	2.86876e-23
NRDC	-0.0596725	0.0517697	0.0124116	-0.128405	-0.0772001	0.000325244	0.0317031
NRP1	-0.0130788	0.0523936	0.142501	-0.0292799	-0.171099	-0.0344814	0.00673086
NRP2	-0.0669301	0.0895454	-0.111729	0.0564514	-0.143336	-0.0613845	0.0370521
NSDHL	-0.135961	0.0909135	0.0822626	-0.0564829	-0.187287	-0.0296324	0.00454662
NSUN2	-0.0305852	0.0526361	-0.083312	-0.0864823	-0.017165	-0.0322348	0.00533164
NT5C	-0.0919959	0.00936486	0.0154659	-0.0387469	-0.184758	0.122113	0.00224527
NT5E	0.155146	0.0792426	-0.179432	-0.0456709	-0.197969	-0.0470231	0.000209975
NUDT5	0.0695196	0.0525072	-0.0592256	0.0893816	-0.215383	-0.0276606	0.0149585
NUMBL	-0.121664	0.072469	-0.0485222	-0.0681605	-0.249221	0.0710344	0.00186456
NUP133	0.113325	0.0641524	-0.057308	-0.183383	-0.264712	0.0448449	0.000410583
NUP205	-0.164076	-0.000892603	0.0030454	0.0316675	0.0339836	0.0353139	0.00178042
NUP85	-0.02127	0.0787973	-0.202384	0.00789856	-0.316151	0.071956	7.81572e-07
NUP98	-0.30175	0.136453	0.1693	0.264914	-0.40224	-0.066257	4.89455e-16
OLFM4	-0.182719	0.0734183	-0.136357	-0.0735131	-0.222624	0.102987	0.0132945
OLFML3	-0.13057	-0.117115	0.0229386	0.246506	-0.0890346	0.239243	3.70289e-11
OMD	0.0659675	0.053355	-0.140361	0.0122378	-0.216477	0.0181796	0.00939478
OSMR	-0.0323349	0.00193917	-0.0901322	-0.0586151	-0.0807623	0.0930169	0.000586851
OSTF1	-0.102475	-0.0298421	-0.0214305	-0.0128634	0.0238702	0.0937904	0.0011843
OXSR1	0.104264	0.00685207	-0.02168	-0.0739077	-0.0249382	-0.010698	0.00780343
P2RX4	-0.0413031	-0.0178464	0.0259488	-0.128314	0.00527929	0.0812656	3.24542e-16
PACS2	-0.110782	-0.0165997	-0.0122552	-0.130957	-0.108174	0.175657	4.59143e-09
PACSIN2	0.00523169	-0.000975465	-0.181686	-0.121883	-0.244054	0.214138	1.1438e-09
PADI4	0.0115972	-0.0286581	0.0577562	-0.0824327	-0.0512606	0.0890494	2.95496e-13
PAF1	-0.0369481	-0.0605377	-0.0818364	-0.105041	0.0163148	0.177253	4.42804e-23
PAPSS2	0.192274	0.049607	-0.0425032	0.0675381	-0.188734	-0.0800868	0.0240398
PARP1	-0.144364	0.0100833	0.0052215	-0.0466517	0.0655002	0.0142058	0.00193102
PBDC1	-0.101838	0.0320731	-0.0959609	-0.0723842	-0.0180676	0.0339438	7.27338e-08
PBLD	-0.115357	0.0334498	-0.170323	-0.158208	-0.0175217	0.0826568	0.0480303
PCOLCE	-0.289437	0.0358617	-0.120786	-0.154665	-0.0136111	0.127941	2.42373e-06
PDAP1	-0.0309249	0.0921171	-0.172734	0.182949	-0.309724	-0.0166433	5.75894e-06
PDCD10	-0.112164	-0.0393162	0.0646401	0.125336	-0.0873227	0.108117	0.000556412
PDE12	0.138458	0.0361146	-0.181245	-0.0796752	-0.211407	0.0611275	0.00414082
PDIA3	-0.000243292	-0.0401893	-0.0754711	-0.00698037	0.0823118	0.056554	0.000833899
PDIA4	-0.00415129	-0.0281287	0.0572044	0.0754491	0.0157702	0.0089831	0.00451455
PDIA6	0.0980028	0.0162056	-0.143498	-0.115692	-0.00411758	0.00760807	0.0104349
PDK1	-0.0500305	0.014098	-0.0707309	0.0396438	-0.0381479	0.0176494	4.24553e-16
PDK2	-0.0568092	-0.0254598	-0.0812456	0.0472771	-0.0588126	0.108028	7.09122e-13
PDK4	-0.0167924	-0.0431567	-0.0418552	-0.0440082	-0.011074	0.120612	1.46106e-32
PDLIM3	-0.116658	0.0218749	0.0867365	-0.106731	-0.0746051	0.0522403	0.0153373
PDPR	-0.00765311	0.0828614	-0.0568716	-0.0408463	-0.150443	-0.0507401	3.72346e-10
PDS5A	-0.122359	-0.0351431	0.0558329	-0.0871956	0.04152	0.105672	0.0225215
PFDN4	-0.0624712	0.0121657	-0.111927	-0.0738789	-0.165469	0.139687	2.16998e-10
PFN2	0.146858	-0.0612012	-0.134409	-0.191482	-0.058453	0.189146	5.11896e-19
PGPEP1	0.19533	-0.0422064	0.000954549	-0.0947727	-0.0706213	0.0744701	0.0249002
PHIP	-0.108678	0.0456679	-0.0466075	-0.02828	-0.0547986	0.00269783	0.00657248
PIGR	-0.0946644	-0.00326778	-0.166333	0.0908701	-0.127098	0.123721	0.0139708
PIGS	-0.0328409	-0.0248575	-0.0216671	-0.0253122	-0.0295037	0.0897702	0.00376452
PITPNM2	0.0108465	-0.0192485	-0.0137444	-0.00708735	-0.260662	0.176018	5.02371e-07
PKP1	-0.0943681	0.0596116	-0.0447466	-0.0409767	-0.0432638	-0.0322721	0.0315256
PKP2	-0.0142893	-0.0308437	-0.0250906	-0.0274295	-0.0237207	0.0928474	3.39851e-29
PLBD2	0.174312	0.108963	-0.285612	-0.209322	-0.318386	0.0308918	3.36661e-15
PLD3	0.114873	0.0623665	0.0678019	-0.310861	-0.237335	0.0409961	3.38452e-05
PLOD1	-0.0839126	0.00904643	-0.0826985	-0.0900578	-0.0196628	0.0747065	3.01879e-33
PLP2	0.00557066	-0.0477512	-0.125744	-0.0763681	-0.0886187	0.193906	0.0183095
PLXNA1	-0.204366	0.0292476	0.0957076	-0.0996413	-0.0453065	0.0512576	0.0290663
PMPCA	-0.0221098	-0.0253417	-0.0389316	-0.0135921	-0.000148334	0.0720023	2.64077e-05
PMPCB	0.109052	0.0417195	-0.226743	-0.122767	-0.0466338	0.000304784	0.0120028
PNKP	0.0862172	-0.0389791	-0.0239299	-0.0987336	-0.000599366	0.0805561	1.61688e-07
PNP	-0.307198	0.0655279	-0.000135178	-0.26814	0.0899479	0.0271912	0.000371959
PNPO	0.0453362	-0.0124965	-0.18817	-0.0944366	0.0640644	0.0522711	0.0341731
PODXL	-0.283795	0.00688896	0.0218549	-0.0395627	0.0939257	0.0517756	0.00285418
POLR2H	-0.0826713	0.046419	-0.13423	-0.142429	-0.101345	0.0747967	0.0312749
PON3	-0.0965086	-0.0352449	-0.115108	-0.0417615	-0.165805	0.235277	0.00963776
POSTN	-0.0821753	0.164498	-0.239778	0.0466586	-0.516559	0.0319354	2.10723e-10
PPA1	0.221337	0.0607016	-0.251163	-0.219187	-0.369872	0.127718	2.4415e-07
PPIB	0.0156614	-0.0210589	-0.0798706	0.0168151	0.0111984	0.0444752	0.0475007
PPP2R1A	0.0788933	-0.0222348	-0.10459	-0.0218878	-0.0216214	0.0586992	0.00570085
PPP4R1	0.0269149	-0.0685961	0.0863203	0.0552916	-0.0898531	0.129874	2.62003e-05
PPP4R3A	0.0320302	-0.0731553	0.0654407	-0.110948	0.0334736	0.129944	5.69914e-08
PPP6R1	-0.032619	0.0435437	-0.0523159	-0.0930867	-0.0153135	-0.0208241	0.000768058
PRELP	-0.105126	0.0855123	-0.0661952	0.016564	-0.318755	0.0538708	7.04199e-13
PRKCA	-0.0618551	-0.053987	0.0790546	0.0407294	-0.0374926	0.114238	1.97782e-06
PRMT1	-0.111798	0.0440071	-0.015484	0.0560236	-0.0714571	-0.018921	0.000610545
PRMT5	-0.0899475	0.00668918	0.0210485	-0.0797702	-0.0672464	0.0762587	1.48898e-30
PROZ	-0.175925	-0.0126598	-0.310929	0.135566	-0.0143841	0.13708	0.0193567
PRPF19	-0.200293	0.0475218	-0.280059	0.0896771	-0.064424	0.0625321	0.00035798
PRSS29P	-0.125499	0.0429538	-0.076798	0.068964	-0.037939	-0.0173993	0.000269904
PRTN3	-0.127148	0.0141034	0.255432	-0.080287	-0.0712845	0.0171575	1.22194e-08
PRUNE1	-0.0722385	0.0394382	0.055723	-0.0366769	-0.0784123	-0.01069	1.28128e-17
PSAP	0.122043	-0.00404066	0.0446818	-0.0972559	-0.0399681	0.00162473	1.10775e-07
PSEN1	-0.0473642	0.0208926	-0.0590419	-0.151677	0.0726915	0.00265825	0.0496995
PSMA8	0.0127827	-0.0360015	-0.0349109	0.0357582	0.0652121	0.0283947	0.00566481
PSMB1	0.0235493	-0.0270809	0.166662	-0.0341286	-0.18279	0.106919	0.0177649
PSMB7	-0.0586399	0.0143694	0.022265	-0.00342044	-0.0192382	-0.000192689	1.27991e-05
PSMC2	-0.249656	0.0653758	-0.19608	-0.0931335	-0.258041	0.184365	1.8189e-05
PSMC6	-0.00698143	0.0462547	-0.0139778	-0.200554	-0.0681581	0.0159576	0.0168822
PSMD11	-0.127625	0.0144835	0.202861	-0.0946462	-0.125967	0.0636028	2.56405e-06
PSMD2	0.0234185	-0.00518256	-0.129976	-0.234391	0.0607293	0.0772489	0.0141281
PSMD5	0.055411	-0.0389365	0.131688	-0.0628829	-0.0470184	0.0646328	0.00101925
PSMD9	-0.126075	-0.0865786	-0.190396	0.149618	0.0624318	0.185059	1.71361e-07
PSME1	-0.0625528	-0.0369917	-0.128659	0.161584	0.082535	0.0344611	0.0221368
PTGDS	-0.0954	-0.0502662	-0.178412	-0.00253406	0.123382	0.116035	0.00671876
PTK2	0.267337	-0.0327554	-0.0450586	-0.0472709	-0.0276826	0.00325339	2.34557e-12
PWP2	-0.0057073	0.0430045	-0.0862405	-0.0315681	-0.0702044	-0.0117384	0.00312918
QSOX1	-0.190649	0.0198653	-0.188929	0.188959	-0.183654	0.119948	0.0172469
RAB14	-0.0565292	-0.0792966	-0.0741274	-0.111676	-0.0580209	0.260179	0.0342726
RAB18	-0.0640265	0.0236795	-0.0962024	-0.0705498	-6.48e-05	0.0258718	3.0264e-05
RAB27A	0.014068	0.0958943	-0.20743	-0.162422	-0.192964	0.0158481	0.0281584
RAB3GAP1	-0.0501383	-0.0572045	0.0392482	-0.0519376	-0.010738	0.141645	6.95438e-09
RAB4B	0.0804241	-0.033457	-0.0201477	0.0171458	-0.0250107	0.0472637	0.00892831
RAB7A	-0.0652046	-0.0141486	0.00767907	0.0153553	0.0335613	0.0276425	0.005434
RAB8A	-0.110402	-0.0135055	-0.0510046	0.230585	-0.104941	0.0636085	0.0174858
RABGGTB	0.139451	-0.019138	-0.305639	-0.149403	-0.17925	0.205356	2.55041e-07
RAC1	-0.25722	0.108521	-0.0303449	-0.0548111	-0.206419	0.0211815	4.10323e-05
RAC2	-0.154671	0.0355977	-0.136626	-0.0046149	-0.287203	0.177826	1.25327e-06
RAC3	-0.125058	-0.0104908	-0.106775	-0.0599024	-0.266491	0.254659	2.47944e-08
RACK1	-0.395383	0.102888	0.0721945	-0.324753	0.0839161	-0.00950062	1.82027e-06
RALGAPB	-0.0247929	-0.05297	-0.0141111	-0.154438	-0.0931794	0.213497	4.30736e-33
RALY	-0.18429	0.0196242	-0.0160769	0.0936238	-0.191913	0.107398	5.31844e-09
RAP1A	-0.26372	0.110062	-0.148727	0.131591	-0.320038	0.0523337	2.28004e-06
RAP1B	-0.265074	0.10892	-0.151253	0.11439	-0.310884	0.0563444	1.0441e-06
RBM12	-0.0954375	-0.000851825	-0.182696	0.0427185	0.0402323	0.0508655	9.20222e-09
RBM14	-0.00695315	0.0269571	-0.0959346	-0.146122	0.029945	0.00591797	1.40927e-05
RBM3	-0.0597479	-0.0317567	-0.0300608	-0.056683	-0.00674886	0.113489	6.69996e-12
RBM8A	-0.0102362	0.00698769	0.016541	0.00134693	-0.106793	0.0417496	0.00110523
RBP1	0.219195	0.0743873	-0.150068	-0.0312585	-0.356081	0.00897797	2.50735e-07
RCOR2	0.0605987	0.103263	-0.137271	-0.0428589	-0.197018	-0.0700565	3.26816e-06
REXO2	-0.0717224	0.0321472	-0.0671267	-0.0975874	0.0210877	0.0022367	6.2186e-08
RGPD1	-0.189371	0.034352	-0.111381	-0.0842555	0.0403856	0.0397921	9.74518e-06
RGPD2	-0.189371	0.034352	-0.111381	-0.0842555	0.0403856	0.0397921	9.74518e-06
RIDA	-0.0298968	0.0173842	-0.0758973	-0.116256	-0.139958	0.10781	0.000675386
RIOX2	-0.0862814	-0.0328191	0.169245	0.043502	-0.0850661	0.083114	1.51681e-11
RNF13	-0.266611	0.0111555	-0.0751087	-0.139513	-0.115855	0.204172	6.92237e-06
RPL10A	-0.128325	-0.0810438	0.179525	0.134242	-0.0309106	0.132624	5.16777e-10
RPL17	-0.0881337	-0.00269535	-0.00736742	-0.0236244	-0.0608921	0.0800649	3.34581e-11
RPL18A	-0.0291553	0.000899971	-0.0664891	-0.075814	-0.0272325	0.0649536	2.2996e-06
RPL22	-0.0241509	-0.105266	-0.12703	-0.0685266	0.00651813	0.26442	1.0289e-11
RPL24	-0.290955	0.0629495	-0.185857	-0.112178	0.114331	0.0123366	2.98379e-06
RPL30	-0.00632865	0.0530726	0.0163957	-0.154706	-0.129423	0.0122908	0.0156
RPL36	-0.113192	-0.0611767	-0.00387345	-0.14507	-0.019029	0.21832	1.50285e-08
RPS10	-0.02279	0.014291	-0.0861371	-0.0705394	-0.0857533	0.0708247	0.0107681
RPS10P5	-0.00486153	0.0346878	-0.12021	-0.00878355	-0.0837475	0.0128246	0.0078313
RPS15A	-0.0580627	0.00192729	-0.0561044	-0.064283	-0.011173	0.0591352	1.49023e-09
RPS23	-0.05926	0.0134869	0.00286266	-0.0700695	-0.123321	0.0826036	3.22556e-08
RPS24	-0.0306545	-0.0433351	-0.0346511	-0.0290998	-0.00930572	0.118694	1.2563e-36
RTCB	-0.0836466	-0.0262026	-0.00988563	-0.00970252	-0.00215728	0.0892684	0.00469224
RTN4RL2	0.155872	0.0693095	-0.260427	0.0636096	-0.495905	0.115136	7.11277e-07
RUFY1	-0.0278364	-0.105178	-0.118999	-0.0785414	0.0197662	0.259754	1.0327e-07
S100A6	-0.0532538	0.0152073	-0.0576713	-0.0852277	0.0176325	0.0234791	1.9858e-08
S100B	-0.13042	-0.100554	0.00769833	-0.00738635	0.0556109	0.215329	1.31861e-09
SAMHD1	-0.210655	0.0374759	0.227236	0.151079	-0.201963	0.00647007	0.00085435
SAMM50	-0.112974	0.0180634	-0.101297	0.121154	-0.0960574	0.0464956	0.041215
SAR1B	-0.0594642	-0.000258658	-0.0339235	-0.0395276	0.00674415	0.0408676	0.00394659
SARM1	-0.00933272	-0.0318359	-0.0606424	-0.076292	0.0515021	0.0780692	0.00226073
SARS2	-0.374358	0.028685	0.019021	-0.0333134	-0.150238	0.171044	6.23897e-05
SART3	0.0696541	-0.0297859	-0.0060384	-0.244664	-0.0155551	0.118375	6.33346e-17
SBF1	-0.0695577	0.0367837	-0.0434369	-0.0782213	-0.0314662	0.0077592	0.00988637
SBSN	-0.0288782	-0.0374211	-0.0502077	0.0250469	0.0422903	0.0663795	5.02411e-11
SCG2	-0.120243	-0.064748	0.0228531	-0.127222	-0.0624107	0.238102	3.11493e-10
SCGB1A1	0.068516	-0.0954464	0.269602	-0.123218	-0.109654	0.185134	1.42033e-26
SCO1	-0.0994895	-0.0591926	0.116435	-0.133767	0.0620197	0.131713	5.69512e-11
SCPEP1	-0.0775735	-0.0299846	-0.157514	-0.0194156	-0.0205225	0.145527	1.83039e-05
SCYL1	-0.0515194	0.0352336	0.0289916	-0.111829	-0.108606	0.0362009	0.00400609
SDC4	0.135472	-0.0543848	-0.0497186	0.0862505	-0.0453989	0.063489	3.60746e-13
SDHA	-0.0432478	-0.0381242	0.0858304	-0.128477	0.0921069	0.0600624	0.00532031
SDHB	-0.124554	-0.0110555	0.0972302	0.0101841	-0.0891181	0.0869374	5.25049e-05
SECTM1	-0.108878	-0.0657164	0.0559792	0.0390733	-0.0479505	0.166839	2.74281e-11
SEH1L	-0.0907765	-0.0750419	-0.13845	0.0247318	0.0780758	0.167036	0.0118333
SEL1L	-0.0274173	0.0194951	0.011035	-0.0550534	-0.0553937	0.0162956	8.98905e-35
SEPHS2	-0.336906	0.079776	0.132037	-0.0593582	-0.196286	0.0608418	1.45208e-05
SEPTIN11	-0.110865	0.0328229	-0.0723338	-0.00112335	-0.0691849	0.0340923	0.04321
SERPINA11	0.0130857	0.0373107	-0.135445	-0.105623	-0.0928934	0.0403382	0.000850104
SERPINB12	-0.0604874	0.0243955	0.111323	0.0583259	-0.179495	0.022579	0.00443573
SETSIP	-0.0830629	0.00803795	-0.0327188	0.154006	-0.0455004	-0.00029284	1.81576e-09
SEZ6L2	-0.0398378	0.0737571	-0.0663543	0.0575762	-0.263618	0.00995198	0.00561693
SF1	-0.0950538	0.0346281	0.0899342	-0.139689	-0.0956222	0.0399786	0.00716688
SF3B2	-0.190428	0.0470475	-0.0393835	-0.0876272	-0.0713145	0.056609	0.00291287
SFXN3	-0.0421352	0.0299228	-0.0428086	-0.19697	-0.0681745	0.0673241	5.71651e-11
SIN3A	-0.0351577	-0.0398931	-0.0484672	-0.0118495	0.0211324	0.0958852	0.0393987
SIRPA	-0.120179	0.00614615	-0.141683	-0.0912064	0.0717719	0.061769	1.10082e-05
SIRPB1	-0.229348	-0.021291	-0.0654969	-0.0465368	0.0479703	0.134844	5.26695e-05
SLC1A2	-0.0613144	-0.0622267	-0.00177134	-0.0287809	-0.029517	0.168863	9.54705e-34
SLC25A13	-0.0903383	0.0527191	-0.0855799	0.194206	-0.146063	-0.0301254	0.00456522
SLC25A4	-0.0314294	0.00554654	-0.0931429	0.130707	-0.151977	0.0640445	0.0237595
SLC27A3	-0.0312182	-0.0228515	0.00461956	-0.0344176	-0.0379834	0.085749	3.78925e-05
SLC39A14	0.0379387	0.017776	0.0237838	-0.16533	-0.033562	0.0148936	0.0200888
SLC9A3R1	-0.0446632	-0.034473	-0.0732292	-0.0511539	0.0246969	0.106009	2.86013e-05
SLIRP	-0.140759	0.0230169	0.0416681	-0.165495	-0.141734	0.124801	6.97332e-13
SMARCA1	0.0920044	0.00452278	-0.315427	0.0929412	0.0193841	-0.000963511	0.039008
SMARCA4	0.14923	0.0481697	-0.2812	-0.186563	-0.0281047	-0.00279471	0.0110696
SMC3	0.150107	0.0179419	-0.126589	-0.0729618	-0.180527	0.0592889	8.44234e-06
SNAP25	0.172557	-0.0753287	0.0632628	-0.0594238	-0.0227279	0.0946518	7.6911e-13
SNAP29	0.0477441	-0.0238533	0.0903619	-0.0589598	-0.0780279	0.0641712	0.0472461
SNX2	0.0360363	0.00580667	-0.0285492	-0.0930203	-0.0160109	0.020358	1.68719e-19
SNX9	0.0543162	-0.0205757	-0.163448	0.0703198	-0.0998758	0.0921469	8.10595e-12
SP100	-0.0678965	0.0132704	-0.0986046	-0.138632	0.0386723	0.049291	2.08913e-09
SQSTM1	-0.108645	0.0260594	-0.0781301	-0.195639	-0.160452	0.157346	9.88599e-07
SRL	-0.106038	-0.0421798	-0.0106446	-0.0138957	-0.0596716	0.160467	6.43318e-14
SRRT	0.146997	0.0166679	-0.077309	-0.071404	-0.0503018	-0.01887	0.0223744
SRSF4	0.0343413	-0.0024263	-0.104989	-0.123564	-0.00915328	0.0629402	4.90018e-06
SRSF7	-0.0758727	-0.00675978	-0.148305	0.0898411	-0.0289395	0.0673749	0.000112897
SRSF9	-0.127299	-0.0152581	-0.12507	-0.107755	-0.0550784	0.173508	7.04142e-21
SSR1	-0.109645	0.00329998	-0.0271255	0.0804184	-0.0351361	0.0353314	0.000438407
STAT5B	-0.0480528	-0.0118593	-0.103042	0.0653803	0.0903079	-6.52e-05	0.045548
STIM1	0.184102	-0.0225582	-0.110144	-0.034636	-0.00186304	0.0144975	1.58738e-11
STRBP	-0.0381032	-0.0385401	-0.0342214	-0.0383943	-0.00279731	0.111639	0.0359351
STX1A	-0.0958498	-0.0655151	0.0537603	-0.0871622	0.0665343	0.141817	0.0219917
STX7	-0.0614743	0.0113372	0.0365727	-0.0121602	0.00217358	-0.00546949	1.3841e-05
STXBP5	0.130833	0.15629	-0.334269	-0.0552304	-0.547168	0.0399657	6.45657e-13
SULT1B1	-0.1453	-0.0948466	-0.0375702	0.096995	0.00771213	0.213905	7.89538e-21
SWAP70	-0.155663	0.0715454	-0.16252	-0.0200017	-0.120275	0.0324481	0.00114566
SYK	-0.0969747	-0.0215279	-0.0435284	0.00769616	0.0432983	0.0646512	4.06938e-09
SYNPO2	0.0624945	0.0698904	-0.0754199	-0.0653091	-0.218724	-0.00376696	0.0421336
TANGO2	0.00631438	0.145427	-0.249541	-0.225616	-0.113049	-0.0881849	0.0127823
TARS3	-0.041883	0.0304559	-0.0396966	-0.0343274	-0.0342671	-0.00386927	0.0152095
TBCA	-0.13258	0.0243512	0.0279458	0.0487218	-0.20909	0.0903651	3.20672e-06
TBCB	0.0795174	-0.139713	0.232358	-0.0970235	0.0205509	0.199678	5.2348e-32
TBK1	-0.0737755	-0.0674792	-8.3e-05	-0.0389459	-0.0502216	0.197422	8.06168e-39
TBXAS1	-0.00490532	0.0170235	-0.0899244	-0.0274156	-0.0298952	0.016734	3.93042e-09
TCIRG1	-0.0494269	0.0319178	0.0123277	-0.0550971	-0.042777	-0.00636868	0.000180969
TELO2	0.0812528	-0.019458	-0.155963	-0.0749965	-0.0302399	0.0871514	1.22781e-05
TGFB1I1	-0.0242469	-0.0370439	-0.057567	-0.0848843	-0.040575	0.144134	1.11176e-11
THBS2	-0.017505	0.0487195	-0.123775	-0.0572116	-0.057299	-0.00721434	0.0151994
THBS3	0.00134713	0.05868	-0.0811987	-0.0362336	-0.113088	-0.0220714	0.00479073
THBS4	-0.125125	0.0297342	-0.0774754	-0.123782	-0.108564	0.106313	0.0313163
THOC5	0.0326662	0.00298583	-0.165316	-0.204925	-0.0252762	0.103034	0.001051
THOC6	-0.304082	0.0976254	-0.0307087	-0.0178475	-0.142126	0.0146746	0.00519626
THRAP3	-0.00187634	0.0286151	0.0614262	-0.0783042	-0.0607743	-0.0140242	0.0456054
TIMM10	-0.110184	-0.0283691	-0.0153366	-0.109679	-0.0337125	0.153157	2.04008e-11
TIMM44	-0.0809917	0.0649442	-0.358825	-0.0187412	-0.107389	0.0609366	0.00518392
TINAGL1	0.124041	0.0229844	-0.0365313	0.0176195	-0.27676	0.0578666	0.00618133
TJP1	-0.0427754	-0.00866323	0.0226662	-0.0957767	-0.0133496	0.0643995	0.00229119
TK2	-0.0848517	0.022459	-0.163593	-0.151344	0.0968682	0.0283084	1.5788e-06
TM9SF2	-0.116772	0.0281704	0.142704	-0.0191568	-0.067632	-0.00586687	2.63124e-07
TMCC3	-0.11787	0.079173	-0.176716	-0.180236	-0.0741215	0.033443	0.0110727
TMED7	-0.118619	-0.00389083	0.132184	-0.0786105	0.0172214	0.0338662	9.00943e-07
TMED9	-0.025409	0.0103749	0.0265833	-0.0870479	0.0203355	-0.000552365	0.0182856
TMEM214	-0.0702583	0.00468921	0.0649712	-0.143968	-0.0359241	0.0650369	1.17487e-06
TMEM256	-0.209976	0.0664618	-0.0568303	0.17998	-0.180362	0.00368347	0.0164832
TMOD2	0.187135	-0.0567818	-0.0546748	-0.143079	-0.0905345	0.146063	9.97714e-11
TMPRSS13	0.153655	0.0741493	-0.0601654	-0.0756004	-0.27345	-0.0185618	3.49892e-15
TMPRSS6	0.134767	-0.0455406	-0.105549	-0.184244	-0.0361078	0.14184	1.12547e-11
TNC	0.118158	-0.00498143	-0.0565264	-0.049013	-0.0687602	0.0312042	0.000124079
TNFRSF21	-0.0525332	0.0679229	-0.198338	-0.226738	-0.195467	0.114575	4.25902e-05
TNPO3	-0.0756329	-0.00111657	0.0932136	0.15659	-0.1653	0.0439266	0.000378634
TOM1	0.0891321	0.0179846	0.0109953	-0.0954899	-0.255867	0.0931808	0.000701038
TOR1AIP1	-0.0541158	-0.0403952	0.111539	-0.0070129	-0.0937194	0.121158	3.40935e-17
TP53RK	0.0117807	-0.0903898	-0.197166	0.171168	-0.0256279	0.181376	2.6675e-06
TPT1	-0.030474	-0.0784944	0.0463058	-0.0995063	-0.011615	0.189078	0.0268019
TRIM21	-0.10446	-0.0955498	-0.0440561	0.0747265	-0.0564059	0.24221	8.14227e-05
TRIM47	-0.0824887	-0.0582752	0.20944	-0.147758	0.00193212	0.135235	2.23175e-26
TRMT5	-0.0860593	0.012122	-0.0249794	-0.0525896	-0.0621553	0.0649975	2.25052e-10
TSC2	-0.065523	-0.0192317	0.0286828	-0.0143739	-0.0760141	0.0991323	5.30007e-22
TSN	-0.0980719	0.011452	-0.00944952	-0.142852	0.00311113	0.0610334	0.00453654
TUBB1	0.0674861	-0.0201339	-0.223577	0.0227454	0.0944323	0.014877	0.0173715
TUBB3	-0.085643	0.021204	-0.0572356	-0.107887	0.0561058	0.010981	0.00192137
TUBB8	-0.00737061	-0.0565919	0.250642	0.010201	-0.0454581	0.067688	0.000201789
UBA1	-0.0691471	0.0329839	-0.0440583	0.0621202	-0.222909	0.0713879	0.00759807
UBE2L5	0.000842204	-0.0213177	-0.0330058	-0.0491161	-0.00130773	0.0657962	0.000208342
UBE2N	-0.108447	-0.00371011	-0.0467954	0.193382	-0.284569	0.14899	5.23115e-09
UBE2NL	-0.145974	0.0392844	-0.110656	0.245589	-0.331863	0.104973	4.29206e-08
UBE2O	0.023742	0.0304999	-0.0692482	-0.0204508	-0.0725909	-0.00538804	7.14784e-35
UBE3C	-0.0696073	-0.0439458	-0.0198875	-0.0351948	-0.013686	0.135036	0.0373376
UBQLN1	-0.0168054	-0.0246455	-0.0392947	-0.0799987	-0.0791808	0.131281	0.0213956
UCHL3	-0.207131	0.149782	-0.051023	-0.129605	-0.180616	-0.0622549	0.00394672
UFL1	-0.0641747	-0.0463089	0.122047	-0.0511996	0.0119523	0.0921083	0.000464742
UHRF1	0.0497593	0.00566058	-0.210589	-0.123592	-0.0598655	0.0956435	0.000858467
UNC50	0.166528	0.0322333	-0.109972	-0.0663687	-0.121431	-0.012107	1.66347e-05
UNC93B1	-0.0199081	0.00717323	-0.00393478	-0.107566	0.00275176	0.0272542	0.000797586
UPF1	-0.337599	0.104998	-0.0592288	0.0482296	-0.371848	0.120423	5.53098e-14
UQCRQ	-0.129851	-0.00380246	0.0528631	-0.164469	-0.124857	0.160488	0.00190467
USP14	0.332357	-0.0768233	0.105822	-0.122358	-0.0175495	0.0429863	0.0037911
USP39	-0.0793169	-0.00136689	-0.198949	-0.00572941	-0.00272757	0.0878892	0.0227557
USP48	-0.0213236	-0.119867	-0.148796	0.144098	0.0035467	0.231631	2.09641e-38
USP9X	-0.0724964	0.0149979	-0.00564539	0.125959	-0.0784637	0.00135265	0.0217623
VAC14	-0.155617	0.0552596	-0.0586736	0.0095463	-0.042445	-0.0133757	0.00268978
VAV1	-0.0769993	0.0583419	-0.0642446	-0.0411543	-0.0432215	-0.0312833	0.0172469
VIL1	0.00652012	-0.0142412	-0.0903131	-0.0545559	-0.0511336	0.092799	0.00190401
VNN1	-0.0351332	0.0311467	-0.12567	-0.162215	0.00137015	0.036364	5.56281e-06
VPS18	-0.0203112	0.0385865	-0.0499859	-0.0408357	-0.0234851	-0.0287274	0.0268019
VPS29	0.0723247	-0.0305686	-0.047064	-0.0902921	-0.0757347	0.112402	0.000239167
VPS36	-0.0768797	0.0307501	-0.0320427	-0.0480336	0.0139389	-0.0141639	3.80767e-08
VPS37B	0.0237898	0.0238572	-0.0298662	-0.110294	-0.0334313	0.00500874	0.0029919
VTI1B	-0.0752907	0.0257681	-0.0132332	0.109376	-0.0959388	-0.00203678	8.67764e-25
WASH4P	-0.143413	-0.0755352	0.0378544	-0.0217497	0.0781498	0.156631	1.96218e-07
WDR75	-0.0880745	0.00145185	0.0037034	-0.0993281	0.00112066	0.0604606	0.0246497
XPNPEP2	-0.0466883	0.0186006	0.0338202	0.049044	-0.081699	0.000308747	0.00969444
YAP1	-0.00826821	0.00100959	0.102962	-0.213195	-0.0342142	0.0597218	0.031017
YARS1	-0.0948649	0.0418637	-0.125307	0.0858195	-0.0514391	-0.0124906	0.0123298
YBX1	-0.0716951	0.0202719	-0.0151021	-0.113847	-0.0910128	0.0757262	1.98371e-19
YBX3	-0.004804	0.0382047	-0.061782	-0.0268554	-0.0402643	-0.026395	3.65534e-08
ZC3HAV1	-0.00276349	0.0348259	-0.31312	-0.0168699	-0.199759	0.125629	0.0138775
A2M	-0.259868	0.00982228	0.0187889	0.569806	-0.228105	0.0144187	1.77351e-07
ACAD8	0.039754	0.0530095	-0.018807	0.325598	0.00304054	-0.217399	5.59433e-05
ACY1	-0.291947	0.00208922	0.0137499	0.335359	-0.0930092	0.0459966	0.0216147
ADAMDEC1	-0.124729	-0.0652799	-0.107028	0.233976	0.139413	0.054407	1.74369e-07
AEBP1	0.000234749	-0.149897	0.135848	1.34377	-0.013854	-0.162838	4.8924e-13
AGPAT1	0.0198396	-0.0593417	-0.0340824	0.376165	-0.0427965	0.0198459	0.000700889
AMPD3	-0.112556	0.0609008	-0.0547068	0.372618	-0.0731364	-0.140347	1.05262e-14
ANP32C	-0.0249362	0.0635303	-0.0309853	0.389226	-0.08024	-0.186391	3.5111e-20
ANXA1	0.0116705	-0.11044	0.0661906	0.975391	-0.139065	-0.0431192	2.60323e-07
ANXA3	0.0850248	-0.0500325	-0.0447517	0.889775	-0.186989	-0.10674	6.02777e-09
ANXA5	0.105974	-0.0377244	0.0240601	0.161559	0.0573747	-0.0546724	3.03295e-06
APRT	-0.057801	-0.0361832	-0.0749192	0.686501	-0.0782123	-0.0644054	0.000380445
ARF6	-0.0348124	0.00776333	-0.0903048	0.308221	0.10417	-0.130491	4.34914e-06
ARFGEF2	0.12092	-0.0546057	-0.0672759	0.177396	0.0451084	-0.00238101	1.31918e-11
ARHGDIB	0.158983	-0.121361	-0.189866	0.668859	0.124019	-0.0524402	1.12974e-08
ATG4B	-0.044567	0.0352635	-0.0746748	0.401684	0.0250806	-0.172105	0.00332294
ATP6V1B1	-0.115277	0.0156866	0.0256187	0.197881	-0.0194495	-0.0456694	0.0011843
BPTF	-0.0765882	0.0466619	0.0672631	0.250501	0.0070206	-0.161759	0.000765365
CAMKK2	0.134592	-0.0593573	-0.120318	0.13336	0.070494	0.0160502	0.0488921
CAPZA1	0.159296	-0.0593942	-0.236519	0.219828	0.24241	-0.0806554	4.82814e-06
CDK14	0.166558	0.101079	-0.0591762	0.255815	-0.10185	-0.270877	6.68206e-11
CENPV	0.0160036	0.152976	-0.17636	0.296218	-0.109073	-0.29267	7.46574e-15
CFL1	0.399593	-0.19675	-0.318422	0.702895	0.453409	-0.148114	2.84742e-17
CFL2	0.103363	-0.0645474	-0.168061	0.754719	-0.0402278	-0.0878647	0.000835611
CLC	-0.0339516	0.0150832	-0.022251	0.497307	-0.0825356	-0.124388	2.3822e-27
CNPY3	0.149088	0.0885343	-0.0930222	0.261492	0.0845285	-0.330895	1.33177e-11
COMMD5	0.17325	0.0296977	-0.0296841	0.249672	0.00760022	-0.198456	2.12141e-24
COPS3	0.354125	-0.0287779	-0.201312	0.35686	-0.0298906	-0.123247	5.73662e-05
CRHBP	-0.0167882	0.0207697	0.0518594	0.21173	-0.0657539	-0.0797682	0.0232955
CROCC	-0.0701327	-0.0420209	0.00934364	0.303108	0.0608295	-0.0222633	9.17234e-15
CSF1R	-0.0115606	-0.0662144	0.0787645	0.214055	-0.0540433	0.0728054	0.00449282
CSNK2A1	-0.0403092	-0.0497179	-0.0284	0.206517	0.172133	-0.0367954	0.00961947
CSNK2A3	-0.00184516	-0.0455508	-0.0221842	0.178725	0.159067	-0.0454258	0.00320031
CTSD	0.169405	-0.0939071	-0.0270333	0.202633	0.025318	0.0472644	0.000149229
CTSZ	0.294202	-0.0700667	-0.0346669	0.144812	0.0426285	-0.0350878	6.36513e-13
CYFIP2	0.140326	-0.0382499	-0.223637	0.471432	0.00573688	-0.0729105	0.00159566
DCTN2	-0.12163	0.0731915	-0.312562	0.380352	-0.497694	0.1273	1.35601e-15
DDAH1	-0.0680633	-0.0364625	-0.0671356	0.398709	0.0381583	-0.0321745	0.00533347
DDT	0.292667	-0.0929767	0.14684	0.489906	-0.147346	-0.0467364	2.67289e-05
DDX23	-0.148777	0.0582233	-0.161059	0.237742	-0.0467328	-0.0649044	0.0496645
DDX6	0.0189872	-0.023588	-0.0552443	0.270774	0.194218	-0.134828	1.05246e-24
DIDO1	-0.0656867	0.136134	-0.126528	0.223228	-0.0900787	-0.228959	1.54086e-16
DLGAP4	0.0452343	0.112689	-0.153901	0.277294	0.0289464	-0.298166	6.70562e-13
DNAJA2	-0.0610262	-0.0536998	-0.0339111	0.629806	-0.0412104	-0.041478	1.01895e-05
DPEP2	-0.21527	-0.0229789	0.095825	0.316239	-0.101754	0.0546847	0.00523066
DRG2	-0.0457121	-0.0683185	-0.0530857	0.407257	-0.0616384	0.067136	0.0152583
DTD1	-0.0374335	-0.0178821	-0.00349236	0.366945	-0.0311698	-0.049896	1.58738e-11
EEF1AKNMT	-0.0431011	-0.0275	-0.0302466	0.368347	-0.0334586	-0.0213785	0.0242276
EFNB1	0.194944	0.025108	-0.128944	0.343999	-0.10039	-0.144961	2.55847e-05
EIF4G2	0.0787628	-0.0333977	0.0155964	0.171741	-0.0568286	0.00629724	0.0368132
ELP3	0.130447	-0.0145041	0.176323	0.218149	-0.0660018	-0.101687	0.0155087
ENO2	0.167649	-0.124071	-0.0747264	0.661264	0.0447458	-0.0364419	2.02885e-11
ENO3	0.17523	-0.0821456	-0.147553	0.498792	0.184801	-0.123771	3.93109e-10
ERMP1	-0.0419631	-0.0750462	-0.0610426	0.286496	-0.027409	0.10101	9.14e-25
EXOC2	-0.109123	0.0490434	-0.092442	0.311328	-0.114731	-0.0675942	0.00558689
EXOC7	0.147631	-0.0428296	-0.048067	0.423913	-0.0692519	-0.0581667	0.0463157
FAH	0.23433	-0.0948037	-0.0348649	0.461897	0.0731693	-0.0807276	0.000133038
FHOD1	-0.0427775	0.034814	-0.145176	0.25052	0.0654243	-0.126932	1.94451e-13
FLG	-0.116002	-0.0179002	0.177703	0.276279	-0.120595	0.00836235	0.000842602
FUS	-0.126737	-0.0715257	-0.00590442	0.330478	-0.112324	0.142707	0.00113297
GAPDH	0.191364	-0.155829	-0.113978	0.687797	0.320258	-0.126917	1.82766e-12
GLRX	0.0797414	-0.0189589	0.312655	0.235563	-0.0458295	-0.125495	0.00570085
GP1BA	0.138246	0.00451001	-0.169506	0.38149	-0.0857427	-0.0925279	0.000288017
GP5	0.10781	-0.0671711	-0.0353249	0.347061	0.147648	-0.0889588	3.94823e-07
GPNMB	-0.0638021	0.0225038	-0.250859	0.321784	-0.200634	0.0497883	0.000199876
GPX3	0.026787	-0.0362274	-0.324443	0.230614	-0.0315099	0.0882799	0.0210603
GSR	0.178194	-0.0131568	-0.172367	0.212259	-0.136938	0.00770196	0.0214853
GSTP1	0.0936785	-0.132202	-0.143541	0.867036	0.0965493	-0.0669738	7.64812e-09
GUK1	-0.0921901	-0.00638834	0.119089	0.385547	-0.0577121	-0.0752862	0.0290663
GYG1	0.189219	0.0463823	-0.0013514	0.220942	-0.0447338	-0.207624	4.9085e-12
H2AC1	-0.0300636	-0.00599527	0.100708	0.194381	-0.0457644	-0.040659	0.0363924
H4C1	0.0246431	-0.0581523	-0.111063	0.380485	-0.032635	0.0290936	0.000314272
HAGH	0.0754697	-0.072665	0.0436235	0.171329	0.17099	-0.0433453	0.0112644
HECTD1	-0.0205909	-0.00368623	-0.127152	0.315153	0.0712335	-0.0889774	9.05363e-10
HMGB1P1	-0.123892	-0.0876041	-0.163395	0.261295	0.124851	0.111047	0.00941027
HNRNPA1L2	-0.0626741	0.00744001	-0.0543992	0.284234	-0.0837935	-0.0222638	0.0362328
HNRNPA2B1	-0.0740722	0.0220314	-0.128189	0.349928	-0.0835454	-0.0478524	0.000529883
HSBP1	0.00634645	-0.0033985	-0.0776802	0.291204	0.178764	-0.161617	4.88399e-12
HSPA1L	0.15856	-0.0866768	-0.0834348	0.330196	0.183973	-0.0716504	1.01459e-08
HSPA2	0.378486	-0.129204	-0.189773	0.33669	0.328507	-0.123029	3.00987e-14
HSPA5	0.205153	-0.104436	-0.207756	0.215506	0.167928	0.022198	4.06856e-07
HSPA6	0.0949658	-0.0815885	-0.052667	0.231874	0.206185	-0.0459872	8.83622e-07
HSPA7	0.312448	-0.0691906	-0.172667	0.528092	0.114675	-0.166777	2.57621e-12
HSPB7	0.000331013	0.0142404	-0.187678	0.371956	-0.215253	0.016796	0.000994085
IDH1	0.0937008	-0.0446738	-0.129999	0.415028	-0.0125666	-0.0397472	0.0151815
ILK	0.1251	-0.0318627	-0.146481	0.170539	0.133507	-0.0716548	7.39748e-08
INPP1	-0.0482023	0.0823514	-0.12378	0.241133	0.0214787	-0.196453	1.51852e-12
ITCH	0.0155134	0.0675284	0.0440587	0.23608	0.00448729	-0.225175	3.75884e-25
KANK2	0.18489	-0.0798905	-0.0120631	0.187614	0.113295	-0.0311633	6.8566e-05
KDM6A	0.0205691	0.0253849	-0.0958337	0.400297	-0.0312449	-0.14212	3.37298e-16
KLK6	-0.16408	0.0271349	-0.166992	0.296832	-0.166899	0.0471468	0.0132448
KPNA1	-0.0762441	-0.0781884	-0.0520968	0.355776	-0.0678886	0.117143	3.59937e-32
KRT72	0.170032	0.0123861	-0.204328	0.169153	-0.052673	-0.0610012	2.24721e-05
LASP1	0.0663989	-0.118612	0.00685616	0.346	0.31189	-0.0706251	1.18398e-05
LCP1	0.501702	-0.175052	-0.246696	0.629456	0.185637	-0.0836063	4.91429e-16
LMF2	-0.00817467	-0.00557896	-0.0580215	0.374559	-0.0155916	-0.0811981	4.34706e-20
LTF	0.0679003	-0.075888	-0.0938037	0.245237	0.264831	-0.0710822	0.000102535
MALT1	0.0259289	0.0375176	-0.033862	0.337703	-0.0185518	-0.170699	1.50833e-11
MATN2	0.0558754	-0.0698265	0.140766	0.226603	-0.0666894	0.0407191	0.0278877
MCTS1	-0.101086	0.152042	-0.167712	0.234116	-0.0298512	-0.270697	7.96951e-27
MGAM	0.0377237	-0.0425884	0.00534315	0.168864	0.03225	-0.00357374	1.556e-10
MIF	0.182567	-0.0597493	-0.162228	0.387178	0.144696	-0.109727	2.05658e-07
MMP1	-0.0955681	0.0442803	-0.0113347	0.309931	0.0416565	-0.166441	0.000756768
MRPL21	0.0485629	-0.00501968	-0.0695658	0.357288	-0.0152572	-0.0955134	0.0245976
MTPN	0.198069	-0.106676	-0.170004	0.396668	0.266194	-0.0895668	3.11313e-06
MYH11	0.191808	-0.0346594	-0.295173	0.201217	0.106108	-0.0480586	0.00135935
MYL6	-0.0205564	-0.0175924	-0.0490153	0.364666	-0.0712761	-0.0231815	0.0473713
NAA11	-0.0509838	0.035353	0.00762337	0.239303	-0.0211006	-0.11569	0.00571659
NAMPT	0.056364	-0.0621669	0.036124	0.681599	-0.107991	-0.0691639	3.59627e-07
NAXD	0.267934	-0.0581557	-0.162043	0.368372	0.0558876	-0.0926221	0.0101849
NBAS	0.17001	0.0455846	-0.129562	0.181759	-0.0670323	-0.141232	1.19108e-50
NFKB2	0.137215	-0.00469012	-0.176126	0.28114	-0.00319695	-0.0842536	0.0283237
NTAN1	0.0240895	0.158028	-0.0641471	0.268274	-0.0906737	-0.335632	2.4636e-12
OGDHL	0.057767	-0.0782198	-0.0418539	0.187728	0.0541551	0.0526625	0.0185133
PABPC1L	-0.00846087	0.0382203	-0.107187	0.346286	-0.018121	-0.142823	2.99266e-12
PAICS	0.161301	0.0452791	-0.0663255	0.26678	-0.302814	-0.0567684	2.1157e-14
PCCB	-0.0209125	0.0313733	-0.120713	0.196602	-0.0511084	-0.0566365	0.0191732
PDCD4	-0.0072683	-0.0193725	0.0955437	0.346803	-0.189798	0.00546786	0.00022932
PDE1B	0.0204215	0.116615	-0.00821791	0.247228	0.0368204	-0.328991	1.25998e-14
PFDN2	-0.0745995	0.0282137	-0.00275091	0.362638	-0.0657181	-0.10574	0.00265003
PFN1	0.376224	-0.182008	-0.321843	0.802137	0.312611	-0.124269	5.25022e-16
PGAM4	0.0147873	-0.135289	-0.026177	0.692449	0.170396	-0.0452919	4.443e-16
PGD	-0.00519362	-0.0960033	0.0176148	1.06803	-0.000724733	-0.154025	2.20929e-12
PGK2	0.120352	-0.114506	-0.00823313	0.573872	0.210653	-0.113948	1.11658e-12
PHC2	-0.0976269	-0.0890099	-0.202698	0.255134	0.129136	0.113752	0.00152742
PIK3C3	-0.0747455	0.0311932	-0.076393	0.391056	0.0389083	-0.156231	0.0055669
PLEK	0.164289	-0.0835818	-0.191128	0.151279	0.0339053	0.0837394	0.0331557
PLS3	0.154119	-0.0139068	0.0836688	0.27403	-0.156972	-0.0575034	2.97146e-06
PPBP	0.333813	-0.102862	-0.304718	0.352284	0.233302	-0.0819933	2.90308e-08
PRH1	-0.0459078	-0.041487	-0.0128996	0.391763	0.0876049	-0.068796	1.51769e-26
PRPF4	-0.144554	-0.0508998	-0.150353	0.230156	0.169182	0.0309394	0.00162664
PRPSAP2	-0.0566947	-0.0292603	0.00912614	0.394719	-0.124733	0.0165607	0.0423568
PSMA1	0.0694791	-0.0700101	0.230856	0.249564	-0.0836887	0.0140867	8.46345e-05
PSMD13	-0.0347798	0.0555959	-0.240016	0.194693	0.0198633	-0.103871	0.0115318
PSMD6	-0.102649	0.0349814	0.212637	0.263561	-0.125355	-0.101712	0.00664355
PTER	-0.0771771	0.0414189	-0.0237898	0.251819	0.124266	-0.18968	1.48618e-30
PTMA	0.0489556	0.0230442	-0.154859	0.181586	-0.0526403	-0.052555	0.01447
PZP	0.0917746	0.02189	-0.362079	0.321707	-0.197914	0.0195525	9.85797e-06
RAB10	0.0811883	-0.133466	-0.113125	0.356985	0.273389	0.000596776	5.98329e-06
RABGGTA	0.177862	0.0556147	-0.21755	0.156744	-0.214562	-0.0552192	0.000601758
RARRES2	0.192365	0.0557626	-0.268371	0.236139	-0.20864	-0.0759692	4.40415e-08
REEP3	0.344507	0.169747	-0.10207	0.301852	-0.0992584	-0.476121	4.20498e-32
RETSAT	0.0324504	0.0458427	-0.248805	0.282195	-0.154235	-0.0443454	0.00246582
RHOC	-0.087392	0.0111117	-0.122903	0.310703	0.162514	-0.139977	2.50466e-17
RNF123	-0.0197133	-0.0212167	-0.0367097	0.382233	-0.0386834	-0.0423804	0.0211048
RNF2	-0.0865226	-0.00545218	0.156232	0.352712	-0.00427993	-0.106645	0.00534546
RNH1	0.0773138	-0.0614715	0.0355844	0.719823	-0.115136	-0.0866497	0.00192744
RPLP0P6	-0.06735	-0.0444526	0.00636509	0.333106	0.147316	-0.0727836	0.0208109
RPS27A	0.0749266	-0.105151	0.263168	0.398541	0.0922649	-0.0679542	8.36074e-07
RPS3	0.056012	-0.108818	-0.087537	0.923564	0.043728	-0.102687	0.00255037
RRAS2	-0.089414	0.111582	-0.0811619	0.293268	0.167786	-0.341944	1.78366e-18
RSU1	-0.0259042	0.0210162	-0.124188	0.36779	-0.0688642	-0.0785731	0.000467876
RTRAF	-0.0351419	-0.0531377	-0.0908303	0.383363	0.173613	-0.0725442	0.0106466
S100A11	0.301924	-0.108231	0.0148842	0.371813	0.118358	-0.0886193	4.59289e-11
S100A12	-0.0423663	-0.0984018	-0.0690963	0.915693	0.0945876	-0.11459	3.89652e-05
S100A8	0.0581987	-0.115245	-0.0195536	1.08338	-0.0692782	-0.099933	1.09114e-27
S100A9	0.197379	-0.169302	0.00262452	1.50558	-0.125246	-0.157913	1.26508e-33
S100P	0.0498852	-0.0563292	0.171113	0.925268	-0.0935829	-0.19785	1.42093e-19
SELP	-0.0689557	0.111206	-0.0896751	0.259066	-0.0360875	-0.228768	1.65939e-15
SERPINB1	0.0941294	-0.0943738	-0.0673529	0.903544	0.0578874	-0.151504	1.00479e-06
SERPINH1	-0.121538	0.00480646	-0.00599122	0.278922	-0.0511023	-0.0229614	0.00108758
SGTA	-0.114843	0.00283622	-0.00130682	0.300585	-0.0824396	-0.0132844	0.00155995
SH3BGRL	-0.0986285	-0.0457237	0.161696	0.269686	-0.0644338	0.0323949	0.00608362
SIGLEC14	-0.0920553	0.0103787	0.135718	0.230476	0.0791366	-0.135055	0.0418625
SKIV2L	-0.117345	0.0652223	-0.146309	0.340912	-0.246505	-0.0218384	0.00059248
SLC38A10	0.125032	-0.0522397	-0.0744112	0.239234	-0.00520215	0.000231906	0.0333903
SOD2	0.0644082	-0.0886184	-0.0277194	0.223557	0.132197	0.0142395	0.00190213
SPG11	-0.0458099	0.0579971	-0.357373	0.258129	-0.137155	-0.0112367	0.00334739
STK3	0.0926802	-0.0234028	0.098435	0.222256	0.114267	-0.145868	7.13787e-06
SUPT16H	-0.10969	-0.110113	-0.115677	1.0899	-0.0943305	-0.00998286	0.000428914
SYNM	-0.0368227	0.0794012	0.0376445	0.303133	-0.182519	-0.149532	0.0283961
TBC1D15	-0.0173993	0.027392	-0.0602779	0.397442	-0.0593706	-0.125188	0.000782925
TCAF1	0.199761	-0.0716728	0.030292	0.245038	-0.00583036	-0.0193055	1.56967e-11
TCEA2	0.0942555	0.0789417	0.00580923	0.361015	-0.0948651	-0.254456	3.67656e-10
TG	-0.0366469	-0.0790866	0.0172768	0.224319	0.0260837	0.0779274	2.19274e-07
TMSB10	0.305309	-0.143542	-0.203444	0.618914	0.0707957	-0.0176903	2.32019e-10
TOP1	-0.067493	-0.0472415	-0.0284479	0.349616	-0.0664844	0.0489265	0.00398584
TTC5	-0.00246819	0.136141	-0.147718	0.334071	0.0353853	-0.348438	1.11219e-11
TUT1	-0.0538859	0.0375594	0.00713219	0.308715	0.0105609	-0.157326	0.000252584
TXLNA	-0.0733831	-0.0351343	0.103759	0.206591	0.0102773	-0.00190387	3.33883e-12
TXN	-0.00608937	-0.102273	0.0415206	0.45849	0.235345	-0.0791389	1.0073e-11
TXNDC5	-0.0688067	-0.018566	-0.420615	0.324193	-0.0374412	0.0889628	0.00199599
U2SURP	-0.0129041	-0.118954	-0.0119603	1.3056	-0.0555361	-0.145241	0.00165361
UBA52	0.0663614	-0.0967627	0.257021	0.386557	0.081664	-0.0699852	4.64552e-06
UBAC2	0.12213	0.100708	-0.136508	0.288065	0.0156091	-0.305072	6.18239e-11
UBB	0.0748026	-0.10302	0.25647	0.391766	0.0919246	-0.0679673	2.21723e-06
UBC	0.0748026	-0.10302	0.25647	0.391766	0.0919246	-0.0679673	2.21723e-06
UCHL1	-0.0498459	-0.00780044	0.029336	0.402494	0.0514426	-0.127945	0.000236384
USP5	-0.0512712	0.0284332	-0.0256034	0.261854	-0.194971	-0.00923957	0.0118978
UTY	0.0200973	0.0264433	-0.0948185	0.399879	-0.0350029	-0.142148	3.26133e-16
UVRAG	0.0565821	0.0654178	0.053447	0.20941	-0.0130325	-0.221477	3.13594e-05
VAMP8	0.0684812	-0.0319594	-0.150792	0.310808	0.119898	-0.0860589	0.000924083
VDAC2	-0.21868	-0.0299461	-0.149745	0.309057	0.16007	-0.00183373	0.0232152
VRK1	-0.071101	0.0569419	-0.00536191	0.273817	-0.0315575	-0.151898	0.00158283
WDR3	0.0424785	0.000565213	-0.0351571	0.361643	-0.0573697	-0.0922363	1.04369e-11
XPO1	0.421823	-0.0648233	0.184959	0.239968	-0.207325	-0.0496526	9.5101e-08
YWHAQ	0.279044	-0.100639	-0.0943397	0.26783	0.210082	-0.0814854	2.67377e-09
ZFYVE19	-0.246503	0.0329424	0.0698115	0.366414	-0.2095	0.00579194	0.000774946
AAAS	-0.0211882	0.100529	-0.0898934	-0.0611788	-0.0479042	-0.118682	0.000458618
AACS	-0.083029	0.0920478	-0.07858	-0.114366	-0.00521643	-0.087365	0.00305828
AADAC	-0.102672	0.08455	0.0235029	-0.110337	0.0716127	-0.133683	4.15794e-06
AAK1	-0.0125308	0.0907474	-0.0759665	-0.0753051	-0.0653369	-0.0930247	1.00668e-14
AAR2	0.0895313	0.100276	-0.0557652	0.076025	0.0711141	-0.275058	2.86554e-11
ABCF3	-0.186313	0.114294	-0.0669883	0.0454446	0.111965	-0.206417	1.0189e-05
ABI1	-0.0413655	0.0375603	0.133465	-0.0809669	-0.038708	-0.0459154	0.0356272
ACAA1	-0.0197523	0.113687	-0.0908227	0.0258335	0.0048908	-0.199737	1.76439e-13
ACAD10	0.00120446	-0.0587168	0.214399	0.0215196	0.10437	-0.00433795	7.98203e-14
ACBD3	-0.0423861	0.041312	0.157181	-0.136322	-0.0108899	-0.0561012	0.0287426
ACOT8	-0.00900824	0.100735	0.0101941	0.0392737	-0.0908641	-0.158993	2.34266e-12
ACOT9	0.0464196	0.157029	-0.15125	0.0750158	0.142018	-0.380663	5.86706e-60
ACOX2	0.0243295	0.169089	0.0224553	0.0460423	0.0949844	-0.407066	1.15752e-18
ACOX3	-0.159939	0.0428591	-0.0393182	-0.0640898	0.113492	-0.051459	0.0162293
ACP2	-0.100961	0.055484	0.0146839	0.148392	0.0485001	-0.145399	0.00555627
ACP3	0.15572	0.0507908	0.00236406	-0.104153	-0.06903	-0.0888515	9.5101e-08
ACSL4	-0.121362	0.0910283	-0.0949939	-0.037606	0.0861122	-0.138846	3.37231e-05
ACSL5	0.114441	0.0673245	0.136744	-0.10411	-0.117128	-0.114994	0.000738234
ACSM5	-0.117933	0.0775765	0.0836319	0.17983	-0.0034463	-0.182366	0.00546999
ACTR6	-0.0504073	0.0628744	0.167114	-0.175799	0.209683	-0.200881	2.33266e-06
ADAM10	-0.140881	0.115855	-0.147305	-0.080657	0.0928325	-0.155796	0.00527562
ADD1	0.369832	-0.0547729	0.141688	-0.0990623	0.0537563	-0.0681469	4.2367e-08
ADH4	-0.0351804	0.10736	-0.0346359	-0.0111892	-0.0252782	-0.168719	0.00398155
ADRM1	-0.106256	0.0516017	-0.0436534	-0.0892087	0.0823277	-0.0633043	0.0384981
AFAP1L2	0.0325698	0.0956627	-0.0438769	-0.128947	0.00752332	-0.149369	2.87948e-09
AGPAT3	-0.0728587	0.0557774	0.120111	0.0847739	0.0470956	-0.163278	0.00562181
AHCYL2	0.0598263	0.0671746	-0.038463	-0.076419	0.0232771	-0.13084	0.000477444
AHR	-0.16127	0.185234	-0.0120468	0.000701774	0.0380889	-0.314662	1.75432e-19
AIDA	-0.0694315	0.157788	-0.041987	-0.107686	0.00479567	-0.236769	2.79116e-21
AIG1	-0.116562	0.0968738	0.169974	0.0890075	-0.0921901	-0.167414	0.000213125
AIMP1	-0.0885684	0.0563076	0.0881105	0.161082	0.0151538	-0.157334	2.62744e-06
AKR1B1	-0.154748	0.0920648	-0.197128	0.0263914	0.148896	-0.154782	0.000399043
AKR7A2	-0.0554313	0.0405864	0.00122865	0.181559	-0.0945455	-0.0656016	0.00771985
AKT1	-0.0252244	0.0821738	-0.0773839	-0.0761005	-0.0298793	-0.0896218	7.86137e-22
AKT2	-0.0305696	0.100721	0.0163159	-0.0663385	-0.0200499	-0.156212	5.74301e-56
ALDH1L1	-0.102198	0.106647	0.00792396	-0.0125349	-0.169079	-0.0769914	0.0161266
ALDH1L2	-0.054706	0.0970748	-0.0858988	-0.0192721	-0.0499134	-0.112511	0.0253777
ALOX5AP	0.0676377	0.156844	-0.155043	0.0249249	-0.0596731	-0.2655	1.11047e-11
AMACR	0.0255884	0.11225	0.0163967	0.0017098	-0.0888166	-0.185238	5.91013e-10
ANKS1A	-0.0507132	0.0829625	-0.0561249	-0.0068942	-0.0511198	-0.097741	0.00585331
ANP32B	-0.0710813	0.08999	0.0234437	0.0276058	-0.0621909	-0.129469	2.64494e-12
ANTXR2	-0.0113357	0.113697	-0.0294032	-0.101585	-0.0378616	-0.156206	1.19471e-07
APAF1	-0.0434815	0.0550771	0.188969	-0.061821	0.0180971	-0.129434	1.57051e-21
API5	-0.105712	0.029482	-0.092553	0.105439	0.0129686	-0.0330008	0.0118978
APOBR	-0.0551519	0.0679132	-0.0481948	-0.0418761	-0.0491707	-0.0589416	4.53483e-13
APOO	0.0703604	0.0717693	-0.0418759	-0.0045588	-0.0154147	-0.145229	5.56136e-16
ARAP1	0.0336942	0.0398169	-0.0515014	-0.0935623	0.0191185	-0.0569313	0.037468
ARF5	-0.0109183	0.024215	0.123814	-0.0831481	0.0472616	-0.0736082	0.00525126
ARFGAP1	0.00557269	0.0846926	-0.0959318	-0.10588	0.00938339	-0.112571	0.000972414
ARFGAP2	-0.107742	0.0690306	-0.112103	0.0496256	-0.0479808	-0.0540377	0.00268139
ARFGEF1	-0.119863	0.059534	0.0553474	0.0140632	-0.0741324	-0.0497358	0.0133697
ARFIP1	0.00441679	0.0996243	-0.138565	0.162573	-0.109729	-0.1522	0.00161291
ARHGAP45	-0.124245	0.0521743	0.112187	-0.0210614	-0.073253	-0.0380026	0.0257613
ARHGAP5	-0.0666887	0.0406481	-0.00643981	-0.0947916	0.157455	-0.10454	0.00654194
ARHGEF10	-0.0696099	0.0828271	0.0341232	0.0698378	-0.00743952	-0.161077	0.00571659
ARHGEF17	-0.0762052	0.0645246	0.172705	-0.0307995	-0.0386116	-0.11107	0.00581634
ARHGEF7	0.00667713	0.09139	-0.0111886	-0.101004	0.0130189	-0.151521	3.54145e-11
ARL1	0.0032997	0.0156174	0.0976094	0.0979821	0.178619	-0.181844	4.93194e-35
ARL8B	-0.057614	0.0826212	-0.106781	-0.0158318	-0.0328038	-0.0880492	2.43258e-05
ARVCF	-0.175221	0.16314	-0.0912346	0.0665948	0.0865059	-0.292208	9.54318e-27
ASCC2	-0.0122028	0.058878	-0.0566512	-0.0501984	-0.00280366	-0.0772768	0.046921
ASNS	-0.0450733	0.0948943	0.125465	-0.0961154	-0.0405243	-0.147719	4.59257e-10
ASPN	0.0502501	0.0983892	0.00453065	-0.0405831	-0.052862	-0.170184	3.45853e-25
ATAT1	-0.0611409	0.0669075	-0.0349148	-0.0797364	0.00105557	-0.0726176	0.0452084
ATG9A	-0.0736414	0.0787123	0.197338	0.0567431	-0.021727	-0.182504	1.81585e-58
ATP2A2	0.0265415	-0.00631887	0.247406	-0.193448	0.0417	-0.0231255	0.00292
ATP2A3	0.0128421	-0.0278681	-0.031762	0.157297	0.133504	-0.0625334	2.13857e-05
ATP6AP2	-0.247036	0.0243217	0.201848	0.0235097	-0.00794157	-0.00928348	0.0100136
ATP6V1C1	-0.0825633	0.129327	-0.0174692	-0.100724	-0.0707445	-0.145551	1.94527e-14
ATP6V1G1	-0.0557177	0.0625584	-0.0284069	-0.00272078	-0.0506026	-0.0651464	0.00533164
ATP6V1H	-0.0826898	0.0926718	0.0218477	-0.146125	0.129526	-0.175691	4.04178e-13
ATP9A	0.183943	0.102786	-0.0296749	-0.172551	-0.0461891	-0.182284	7.84531e-17
ATPAF2	-0.0595528	0.0734443	-0.0464329	-0.047692	-0.0550988	-0.0634884	0.00556069
B3GNT8	0.0152204	0.124671	-0.0647428	0.0434232	-0.0206893	-0.233198	1.60017e-14
BAALC	0.138392	0.03697	0.0903629	-0.169467	0.116301	-0.15524	0.000153283
BAG6	0.0585088	0.0327536	-0.0378024	-0.0486439	-0.0304869	-0.0443671	0.0433471
BCAP31	0.034696	0.108281	-0.204791	-0.0420563	-0.032929	-0.138847	0.0288175
BCAS2	-0.0439216	0.0681807	-0.0338434	-0.0408165	0.172993	-0.184589	5.45025e-05
BCKDHA	-0.0435797	0.0516769	-0.00753321	0.123217	-0.0836159	-0.0765903	1.60281e-09
BCKDHB	0.0780841	0.0433756	0.202532	-0.0814463	-0.0739605	-0.101837	1.07738e-22
BCL2	-0.0468567	0.0826876	0.163037	-0.0575162	-0.0698512	-0.129991	1.05526e-05
BCL2L13	-0.0302097	0.0571206	-0.0261647	-0.0682356	0.00924735	-0.075625	0.0134843
BCR	-0.0480111	0.126383	-0.108521	0.192496	-0.0476845	-0.234046	1.94431e-14
BDH1	-0.0233611	0.0573113	-0.0255334	-0.0113024	-0.05256	-0.0642687	0.000762629
BDH2	0.0686392	0.0943502	0.105401	-0.0232746	-0.0363803	-0.20979	6.84832e-50
BGN	-0.0572091	0.0727377	0.102967	-0.00271972	-0.179333	-0.0508946	0.029336
BID	0.0101096	0.120277	-0.0276513	-0.0094763	-0.00714612	-0.222816	7.66719e-34
BIRC6	-0.0541342	0.0757338	-0.0880576	-0.148344	0.130928	-0.125086	3.13166e-15
BMP1	-0.0208898	0.0642224	-0.0187044	-0.0198889	0.105051	-0.160513	6.28844e-07
BRK1	0.257557	0.00236632	-0.0193157	-0.0908145	0.00886087	-0.0732152	0.0285837
BSG	-0.144807	0.0766259	-0.0955951	0.181545	-0.0292387	-0.110556	0.00017801
BTF3	-0.0432774	0.0821707	-0.0270956	-0.0576679	-0.0453481	-0.0935809	3.29637e-18
BTF3L4	0.135436	0.019974	-0.0671672	-0.0670491	0.0444382	-0.0747132	0.000681008
BYSL	-0.0495833	0.0958912	-0.00533181	-0.012596	0.0342407	-0.17953	3.73966e-08
BZW1	0.0138561	0.0546705	-0.060216	-0.0210617	0.0453967	-0.112638	0.0038284
C11orf58	-0.0327713	0.0449174	0.281436	-0.0626605	-0.0540088	-0.0997715	2.23005e-06
C17orf49	0.238327	-0.0136165	-0.0459622	-0.00951695	0.0583342	-0.0797269	0.00188567
C17orf75	0.12657	0.196717	-0.117506	-0.0704399	0.0472674	-0.40094	1.10922e-49
C1RL	0.0747143	0.0188607	-0.111779	0.0528625	0.0134952	-0.0595288	0.000289782
C1orf52	-0.0280236	0.0731346	-0.0501063	-0.0346911	-0.0198434	-0.0965384	0.00596537
C3orf38	-0.0484866	0.152821	0.148871	-0.0439868	-0.121554	-0.238607	2.26981e-06
C4orf33	-0.0169575	0.0673824	0.0684262	0.0812952	-3.33e-05	-0.167608	0.00580737
C7orf50	-0.0526328	0.0723139	0.030047	0.00149734	0.0481489	-0.153707	0.00588706
C9orf64	-0.019332	0.0427012	-0.0225032	-0.0733956	0.12102	-0.109907	9.58373e-07
CA9	-0.0731791	0.0934638	-0.0145597	0.00597053	0.0320975	-0.168212	0.00592038
CAB39	-0.071589	0.0820327	-0.0574687	-0.148921	0.0537122	-0.0978678	0.000407945
CAB39L	-0.0298131	0.0494872	-0.0323693	-0.0462465	-0.0246513	-0.0485057	4.50256e-06
CACNA2D2	-0.0187925	0.083099	-0.170003	0.0637041	0.0416046	-0.151478	1.24057e-05
CADM3	-0.0240837	0.032469	-0.0443646	-0.0482152	0.113013	-0.0863368	2.51698e-17
CALML4	-0.0884533	0.113941	-0.108756	-0.153896	0.0101481	-0.115413	4.68465e-05
CAMSAP3	0.0719801	0.0201219	-0.131496	0.147085	0.0295778	-0.0940384	0.0319429
CAP2	-0.0280523	0.0400706	-0.0282851	-0.0345218	-0.0265248	-0.0347241	1.73391e-14
CAPRIN1	-0.123588	0.087029	-0.0995292	-0.0938616	0.172532	-0.156714	2.13638e-13
CASP4	0.11036	0.0624905	-0.0671559	0.0968762	0.109563	-0.233615	1.15129e-09
CASP5	0.195661	0.0871669	0.114457	-0.0364528	-0.0669746	-0.226188	2.21671e-11
CBL	-0.000677868	-0.0123763	0.198697	0.0782747	0.0349193	-0.0707146	1.47979e-05
CCAR1	-0.161114	0.0798869	0.176564	-0.118686	0.104994	-0.157313	0.000875558
CCDC47	-0.0393457	0.00156445	0.0922107	0.0774395	0.147033	-0.113936	0.00219757
CCDC90B	0.0865195	0.111275	-0.0473117	0.034269	0.0767814	-0.2872	5.00139e-32
CCL18	0.0504476	0.253462	-0.132794	-0.00906019	-0.00278236	-0.471067	1.18134e-36
CD84	0.0153194	0.124664	-0.044179	-0.0944392	0.0123734	-0.212374	1.36735e-33
CDC42BPA	-0.122271	0.105628	0.0621324	-0.0607147	0.0812938	-0.197926	8.05218e-22
CDH11	-0.0515161	0.0225139	0.150844	-0.0464557	-0.0329613	-0.03139	8.35571e-05
CDH16	0.0326268	0.0855222	-0.115775	-0.146882	0.100177	-0.154031	1.71038e-17
CDIPT	-0.03933	0.0643346	-0.0232859	-0.125425	0.0887985	-0.110623	0.00134099
CDK1	0.0329285	0.0549938	-0.0611865	-0.0438375	0.148474	-0.167233	1.48081e-16
CDS2	0.13064	0.0570707	-0.0261931	-0.015554	-0.0665291	-0.113378	0.00225533
CELA3B	-0.0353363	0.0705659	-0.0460263	-0.0190494	0.0162091	-0.113752	5.49435e-20
CEMIP2	0.0591338	0.132235	-0.0516094	-0.0940367	0.0142526	-0.24284	1.98152e-17
CEP170	-0.0425223	0.0392286	-0.047788	-0.0576327	0.0904146	-0.0766814	4.32092e-05
CEP63	-0.0422873	0.0727108	-0.0258412	-0.0409158	-0.00621962	-0.101829	6.74126e-31
CGGBP1	0.116866	0.198997	-0.116052	0.0900465	-0.0415727	-0.406099	5.1182e-35
CGN	-0.0894692	0.0558935	0.093518	-0.105095	0.0452011	-0.0892297	5.52861e-05
CHCHD3	-0.0467495	0.0547953	0.118118	0.209174	-0.0434957	-0.162477	0.00148093
CHD3	-0.100072	0.115091	-0.0228908	-0.0930626	0.0830174	-0.193174	6.20489e-13
CHML	-0.0697078	0.138272	-0.0833389	0.115182	-0.00724846	-0.25222	2.69385e-17
CIAO2A	-0.151255	0.150722	0.118465	-0.0469938	-0.0717905	-0.212824	6.0324e-11
CLASP1	0.00696027	0.19334	-0.119311	0.0920026	-0.0807877	-0.332591	2.28246e-36
CLDN3	-0.0485667	0.0834421	0.0158896	0.127853	-0.0362266	-0.168708	0.00568893
CLIC4	-0.0607226	0.0296142	0.305021	-0.0647913	0.0136889	-0.100594	8.62373e-09
CLN5	-0.0221567	0.0300298	0.252684	0.108367	-0.116812	-0.08853	7.15132e-18
CLPB	-0.118096	0.0766398	-0.0458058	0.0746636	-0.0935444	-0.0661059	0.00458915
CLTA	0.0961222	0.0148336	0.267426	-0.00549779	-0.0387133	-0.112876	0.00097305
CNOT11	-0.0090397	0.0598506	-0.176403	0.0354021	0.0205191	-0.088449	0.0132802
CNTN2	0.00847721	0.0674246	0.110913	-0.0294319	-0.0226241	-0.141536	0.00017249
CNTNAP1	-0.11023	0.0913792	0.0280664	0.017367	-0.0549133	-0.119099	0.00536975
COA7	-0.065294	0.112762	-0.0314531	0.052694	0.0611082	-0.234198	2.04013e-05
COASY	-0.0279608	0.126349	-0.0837162	-0.0478781	-0.103947	-0.142475	3.10051e-08
COG6	-0.11115	0.16589	-0.0525624	-0.141689	0.0622344	-0.253315	6.78832e-23
COL2A1	0.0916141	0.0758081	-0.0352135	-0.154035	-0.0573704	-0.0935328	3.20172e-05
COL5A1	-0.0363629	-0.0242795	0.11869	0.0478815	0.0413912	-0.00704067	0.00419494
COL5A3	-0.042894	0.0662194	-0.0204831	-0.0462902	-0.0399618	-0.0709868	2.27985e-11
COL6A5	-0.0523648	0.0600136	-0.0301026	-0.0228787	-0.0203744	-0.0705643	1.58026e-43
COL8A1	0.189769	0.0513399	-0.159257	-0.0702302	-0.00629434	-0.104379	0.00242098
COLGALT1	0.0155394	0.0477819	-0.0613289	-0.0262085	0.0373061	-0.0937638	1.84132e-29
COMMD1	-0.0732695	0.100769	0.0329697	-0.0652931	0.0140036	-0.162679	0.00036957
COMMD4	-0.0407385	0.122956	-0.0444159	0.209034	-0.079677	-0.235304	1.69617e-11
COPS7B	-0.0236565	0.036866	-0.0101471	-0.0491468	0.0440675	-0.0674025	0.0109368
COPS8	-0.0557511	0.0758117	-0.0154707	-0.152473	0.174707	-0.165267	0.00115666
CORO7	-0.119386	0.0697112	-0.0102774	-0.127492	0.160944	-0.131326	7.83794e-10
COX2	0.216942	0.0916	-0.105228	0.166904	-0.0554914	-0.255879	6.73187e-09
COX5B	0.0167881	0.0570106	-0.17786	-0.0467808	0.0334581	-0.073184	0.000600793
CPNE8	-0.0596302	0.0430902	-0.0325323	-0.0607216	0.0561555	-0.0626621	6.87289e-12
CPNE9	-0.0212689	0.106759	-0.0543657	-0.0914979	0.0539083	-0.18392	1.89776e-15
CPSF2	-0.0515433	0.0643737	-0.0747855	-0.0748382	0.0701919	-0.0988441	5.57642e-30
CPVL	-0.136339	0.0878924	0.157081	-0.0867122	0.0724052	-0.170114	3.92106e-13
CR1L	-0.0112955	0.0468936	0.0839633	-0.0859801	-0.0272642	-0.0669191	7.81418e-05
CRADD	0.276855	-0.00218438	-0.0742501	-0.035225	0.0284074	-0.0852468	0.000725008
CRELD1	-0.0539491	0.0549893	0.0383794	-0.0824991	0.10595	-0.125652	0.0121235
CRTAC1	-0.134323	0.0133591	0.0806002	-0.0540245	0.130903	-0.0476628	0.0243791
CRTAP	-0.0798795	0.0516891	0.22213	-0.0321296	-0.0232612	-0.105359	0.0268624
CSE1L	0.0304624	-0.0151171	-0.0524583	0.0753108	0.0843487	-0.036751	0.00258074
CSF1	-0.0974503	0.0380402	0.165089	-0.0269868	0.0572243	-0.101313	2.84481e-06
CSF2RA	0.105472	0.0873406	-0.0972513	-0.1911	-0.0381407	-0.103332	0.00204181
CSNK1A1L	0.0398362	0.0873991	-0.105837	-0.126804	0.0920377	-0.165064	8.68006e-14
CSRP2	0.187063	0.0348112	-0.00328694	-0.0817017	0.0118345	-0.11793	1.0444e-47
CSTB	0.158574	-0.0307893	-0.0437286	-0.0451632	0.0907893	-0.022578	0.0214909
CSTF3	0.0232077	0.0714029	-0.134413	0.0824908	0.0736933	-0.176856	1.53764e-15
CTPS2	0.0672198	-0.000433869	0.0905219	0.129522	-0.0954253	-0.0390719	0.00362619
CTRB1	-0.0398241	0.171139	-0.0307897	-0.0814727	-0.00505174	-0.279894	7.16252e-40
CTRB2	-0.0112527	0.142961	-0.0549618	-0.0642029	0.0305703	-0.254042	3.30981e-36
CTSA	-0.0126871	0.119122	-0.101766	0.0988974	-0.0700409	-0.193802	1.37932e-61
CTSS	-0.0493138	0.01722	-0.0656683	-0.0812622	0.0872764	-0.0176932	0.0326625
CUL1	-0.0764603	0.0522479	0.0147546	-0.111048	0.10622	-0.0967531	0.00337076
CUL5	0.0875737	0.133392	0.0844824	-0.0873205	-0.0221245	-0.274374	1.25388e-16
CWF19L1	-0.0946808	0.132104	0.0944614	-0.0895382	-0.110086	-0.158385	4.92639e-05
CYB5B	-0.0639985	0.195959	0.0328032	-0.0883168	0.14745	-0.413385	9.63478e-34
CYBC1	-0.074668	0.0882301	-0.0191384	0.0293449	0.141223	-0.221074	1.76346e-07
CYP20A1	-0.0294886	0.0811849	0.0452426	-0.0619277	0.0045105	-0.140638	0.000185368
CYP27A1	-0.112193	0.0909953	-0.113403	-0.0565729	0.0817469	-0.129166	4.60794e-07
CYP2S1	0.0074837	-0.0222785	-0.00949996	-0.0100117	0.0825559	0.00255349	1.11613e-09
CYP51A1	0.0760771	0.0518613	-0.119042	0.0900041	-0.069035	-0.0904243	2.26192e-10
DAP3	0.149443	0.0368356	-0.0585308	0.0287626	-0.016969	-0.112953	0.00303153
DARS2	-0.0764574	0.0844054	-0.0843128	-0.206955	-0.0158083	-0.0387162	1.68295e-06
DBT	0.192399	0.0239786	-0.047975	-0.0718368	-0.0136048	-0.0770637	6.19648e-07
DCXR	0.0579594	0.0349103	-0.0631309	-0.110108	0.0194691	-0.0485544	0.000169294
DDC	-0.0321057	0.0149247	0.222068	-0.124581	0.0850087	-0.0799492	0.00750233
DDRGK1	0.266132	-0.0508277	0.0182574	-0.0948053	0.0275004	0.00821641	2.58599e-11
DDX3X	-0.181331	0.0413106	0.146321	-0.0493359	0.161731	-0.118794	0.0330037
DDX47	-0.026264	0.045335	0.0646597	-0.0814003	-0.0555628	-0.0397568	0.000329348
DDX54	0.136584	0.0701101	0.00220662	-0.168186	0.0483721	-0.160436	2.28004e-06
DECR2	-0.0377256	0.0905752	-0.00638262	-0.0720272	0.0334639	-0.154259	0.00163126
DEGS1	-0.0237358	0.0753527	0.0432653	0.0691454	0.00726846	-0.173905	0.00581634
DEK	0.115817	0.0266025	0.111641	0.00134279	0.0313757	-0.141511	0.000277008
DEPTOR	0.0679064	0.100221	-0.0957004	-0.181223	0.017474	-0.146789	0.000307358
DFFA	0.0213579	0.0693502	0.107917	-0.0896496	-0.00270568	-0.140801	1.16052e-09
DHCR7	0.0361792	0.122124	0.0945902	-0.230149	-0.161587	-0.11721	0.0388219
DHODH	-0.0792843	0.0325303	-0.0284387	-0.0564068	0.132944	-0.0775519	0.000587485
DHRS7	-0.0372656	0.153508	-0.00876786	-0.12313	0.0431432	-0.264626	2.37936e-52
DHX15	0.292775	0.0972575	0.0319937	-0.136752	-0.0624182	-0.231748	0.000779002
DHX16	-0.0103599	0.0643815	-0.0441742	-0.0392339	-0.0274089	-0.0824221	2.79048e-59
DHX30	-0.0574594	0.0433323	0.276892	-0.0261563	0.0376289	-0.145864	0.0488921
DIABLO	0.0652725	0.0308564	-0.046956	-0.0265589	-0.0403557	-0.0426666	1.11088e-06
DIAPH2	-0.0320144	0.0464741	0.0104944	-0.041878	-0.0243391	-0.0545622	1.0854e-53
DICER1	-0.00602912	0.0941844	-0.111327	0.0155576	-0.0109264	-0.150258	1.4098e-30
DIP2B	-0.043237	0.127849	-0.166476	-0.117246	-0.0214263	-0.13944	1.93026e-14
DIS3	-0.0630568	0.0702575	-0.0512221	0.116628	-0.0405993	-0.114319	1.4181e-06
DLG3	-0.000954177	0.0744571	-0.00886552	-0.0153649	-0.0542835	-0.108136	0.000845612
DLG4	-0.0229874	0.0538991	0.166548	-0.0451889	-0.0370375	-0.105355	0.0467273
DNAAF5	-0.102708	0.152772	8.69e-05	0.0512137	-0.0713216	-0.235634	4.22769e-43
DNAJA3	-0.0714919	0.0620921	-0.0476516	0.00820041	-0.0656757	-0.048767	1.26477e-08
DNAJB1	0.0369998	0.0445022	-0.0702715	-0.0537516	-0.0145276	-0.0572642	0.00128697
DNAJB4	-0.0961061	0.0998491	-0.0634939	0.0604394	-0.0190468	-0.149451	0.00561636
DNMT1	-0.0539025	0.072101	-0.0572307	-0.0475104	-0.0467839	-0.0646424	6.03743e-09
DPM1	-0.0462369	0.0594061	-0.0701193	0.0261359	0.053002	-0.115346	0.00585674
DPY19L3	-0.0079637	0.0825385	0.116751	0.0350972	-0.0426304	-0.17598	0.000770621
DSC1	0.0236481	0.0420297	-0.0726201	-0.123298	0.0199196	-0.0429142	0.0446272
DSG2	0.142607	0.037901	0.209593	-0.0657935	-0.189248	-0.061903	6.68599e-07
DSG3	0.0937285	0.174856	-0.124024	0.0197535	-0.126213	-0.281763	7.89383e-10
DTNB	0.081685	0.0198372	-0.0856136	-0.00128308	0.0724419	-0.0847574	0.000437282
DUOX1	0.0252715	0.165397	-0.065696	-0.0219545	-0.054153	-0.277375	2.95079e-26
DUOX2	-0.0506346	0.0627257	-0.0411412	-0.0534387	-0.0350934	-0.056193	1.31959e-12
DYNC1LI2	0.159086	0.03972	-0.0775797	-0.07247	0.00320545	-0.0958242	6.71902e-31
EBI3	-0.0711504	0.100965	-0.057802	0.0976751	0.0735513	-0.223019	0.000371678
ECHDC1	-0.0678157	0.0367658	0.283693	0.0554312	-0.0993112	-0.0848015	1.76496e-09
EDC3	-0.0651632	0.0616359	-0.00783633	-0.00949275	-0.0425517	-0.067233	0.00527253
EDF1	-0.0339864	0.0338928	-0.0848626	0.139812	0.0555034	-0.103995	0.022481
EEA1	-0.0736415	0.194304	-0.206577	0.0205056	0.0420608	-0.323083	9.90246e-55
EEF1D	0.115618	0.0331616	0.0141412	-0.101875	-0.0330917	-0.0621765	0.0273721
EFEMP2	-0.0132138	0.0383215	-0.106443	-0.0460378	0.137463	-0.0991434	0.0394693
EFL1	0.0737676	-0.0118796	0.157161	-0.0150177	-0.0183804	-0.0315704	0.0386429
EIF1	-0.0869732	0.0799275	0.0509377	0.126397	-0.0529923	-0.147197	0.00555574
EIF1B	-0.0869732	0.0799275	0.0509377	0.126397	-0.0529923	-0.147197	0.00555574
EIF2A	-0.0550085	0.0690336	-0.045611	-0.0278521	-0.0497665	-0.0659613	0.0366373
EIF2B1	-0.0431488	-0.00715867	0.137605	-0.0264442	0.0214057	-0.00855071	0.000780783
EIF2B4	-0.136713	0.112839	0.0649451	-0.0120713	-0.011248	-0.173878	0.000189488
EIF2S2	-0.0559814	0.0871234	-0.026359	-0.0198863	-0.0368808	-0.114943	0.00582974
EIF2S3	0.054043	0.0579605	-0.00142072	0.074287	-0.0247839	-0.142853	0.000487047
EIF2S3B	-0.0515776	0.109999	-0.00286198	0.140776	-0.0171782	-0.228208	4.33257e-26
EIF3D	0.0442564	0.107143	-0.110916	-0.0776088	-0.0158193	-0.162513	1.44561e-46
EIF3E	-0.0440402	0.0167045	-0.0478838	-0.108323	0.094942	-0.0188082	0.00895479
EIF3G	-0.0855146	0.115788	-0.0798883	0.0687063	-0.0172119	-0.183641	2.74454e-14
EIF3J	-0.0188664	0.0826991	0.000439672	-0.100572	0.0613476	-0.153573	2.86013e-05
EIF3M	-0.0347317	0.085315	0.0828048	-0.117742	-0.0525029	-0.108826	0.00525126
EIF4E2	-0.220158	0.107208	0.0160161	0.00439435	-0.0764376	-0.0894825	0.0045662
EIF4ENIF1	-0.0322092	0.109186	-0.081282	0.0458013	0.226086	-0.311376	3.01962e-15
EIF4G1	0.061544	-0.0528885	0.276801	-0.0577851	0.127826	-0.0420543	2.66277e-05
EIF4H	-0.0283859	0.0393967	-0.0384536	-0.0462835	-0.0146623	-0.0331567	0.0011205
ELAC2	0.179717	0.0197135	-0.0310654	-0.0453657	-0.0154333	-0.0758114	0.00150439
ELMO1	-0.0878773	0.0664476	-0.0498268	-0.0936394	0.111598	-0.111407	0.00017214
ELOB	-0.0227051	0.08446	-0.0198065	-0.0130249	-0.0260092	-0.132005	1.31857e-13
ELP1	-0.0453172	0.168724	-0.064526	0.128147	-0.188887	-0.233974	2.3663e-13
EMG1	-0.0620053	0.0563426	-0.0712158	-0.0960474	0.0318035	-0.0533644	0.00739253
EMILIN2	-0.0175761	0.0118688	0.117015	-0.0851431	0.0789108	-0.0614034	3.64565e-05
ENG	-0.0919126	0.0387001	0.00119475	-0.0481243	0.000262757	-0.0253095	0.0164368
EP400	0.0579158	0.206564	-0.0431525	-0.0970508	-0.0589045	-0.34913	4.47122e-35
EPB41	0.137363	0.0637714	-0.147409	0.0556397	-0.0425565	-0.132399	0.00344158
EPHA4	0.12256	-0.0985672	0.204092	0.0850941	0.0548383	0.0354192	4.68722e-06
ERMN	-0.0358481	0.0525963	-0.0550561	-0.0440226	-0.0116366	-0.0538641	0.00021948
ESRP1	0.170764	0.000558547	0.0119391	-0.0938707	-0.011813	-0.0330999	4.93265e-05
ESYT1	0.0509895	-0.0021354	0.201679	-0.0644982	0.0343482	-0.0654859	0.0146972
EVL	-0.0192852	0.0998481	-0.0585953	-0.119562	0.0366952	-0.152262	2.37113e-22
EXD2	-0.046144	0.0461303	0.211552	0.0339709	-0.0337212	-0.120036	4.26052e-25
EXOC6B	-0.0213841	0.0909653	-0.0713584	0.120202	-0.047708	-0.162377	7.14224e-05
EXT1	-0.0169237	0.0343623	-0.0170066	-0.0296054	-0.0117643	-0.0401475	0.0133296
FAAH	-0.03697	0.0839047	-0.125693	-0.067749	0.0245351	-0.107161	7.27593e-06
FABP6	-0.103471	0.0962058	-0.0438798	0.138985	-0.041399	-0.157804	0.000434921
FAF2	0.0230367	0.11402	0.0223298	-0.0650746	0.00976553	-0.219952	2.15784e-17
FAM171A1	0.0142517	0.0726391	-0.0310288	0.00794795	-0.0375085	-0.120793	0.00394441
FAM20A	-0.0533063	0.00286736	0.0989473	-0.0517951	0.0566715	-0.0245527	2.1518e-08
FAM241B	-0.0604197	0.0900906	-0.0590945	0.0321007	0.0406725	-0.167673	2.60502e-05
FAM3B	-0.113452	0.0143815	0.0173744	0.133411	0.15067	-0.110728	7.51942e-05
FAM50A	-0.0992094	0.136524	-0.241828	0.0605282	0.071033	-0.220165	1.96016e-12
FAM50B	0.0687258	0.14715	-0.152552	0.158962	0.0948418	-0.371398	1.76439e-40
FAM91A1	-0.0381505	0.0362356	-0.0227778	-0.0434642	0.00730026	-0.0398555	0.00842286
FANCI	0.082913	0.0650485	-0.0296101	-0.0932031	0.0279243	-0.134928	0.00302938
FBXL15	0.00790806	0.067003	0.0922168	-0.0451124	-0.000429985	-0.142335	3.03103e-05
FCGR2A	0.0364322	0.0399635	0.0924161	-0.094334	-0.0672055	-0.050174	0.0356763
FCGR2C	0.0688382	0.0396832	0.140683	-0.13384	-0.097678	-0.0460077	4.01792e-17
FCHO2	0.000580611	0.0446204	0.0740308	-0.0883266	0.0582442	-0.108641	0.000200321
FDX1	0.00709001	0.0960208	-0.0660381	0.034772	-0.00722883	-0.178627	8.08223e-25
FDXR	-0.0337141	0.0140919	-0.123654	0.0281469	0.0673654	-0.0265561	0.0173642
FGGY	0.0360612	0.178489	0.013859	0.0890282	-0.182124	-0.295398	1.26836e-14
FHL1	0.0870387	0.0962821	0.0659644	0.00926942	-0.074347	-0.200557	0.000209975
FIP1L1	-0.0272386	0.0616368	-0.0197995	0.0981325	-0.00515521	-0.132195	0.00598037
FKBP10	-0.0323083	0.0710322	0.0135977	-0.0860089	-0.00524006	-0.0989091	2.42851e-08
FKBP15	-0.106498	0.0592073	-0.0296281	-0.00982014	0.116123	-0.12447	0.00386811
FKBP2	-0.0360297	0.026642	-0.0260004	0.172318	-0.0894958	-0.0385857	0.00437443
FKBP7	-0.0759948	0.133519	-0.0371413	-0.0584659	-0.0472661	-0.176735	0.00087603
FLNC	0.11055	-0.0224573	0.164857	-0.0284653	0.0236482	-0.0448904	0.0232224
FLT1	-0.0659216	0.058553	-0.0648285	0.0105868	0.103035	-0.12899	0.00575331
FMO1	0.145829	0.116627	-0.0940472	0.0448401	0.175498	-0.363115	2.56675e-20
FN3K	-0.153425	0.21025	-0.164616	0.0106356	-0.088855	-0.262697	3.91508e-22
FNBP1L	-0.0681479	0.139409	0.0272398	0.147356	-0.165537	-0.210822	4.44242e-13
FOXRED1	-0.0221762	0.175974	-0.140044	-0.15773	0.162778	-0.331567	3.10233e-19
FXYD3	0.0339315	0.100763	-0.100594	0.155396	-0.215856	-0.11745	0.00645357
FYCO1	-0.0377619	0.11151	0.105664	-0.146746	-0.0712409	-0.145352	1.09069e-05
G3BP2	0.174242	0.0219902	0.104195	-0.0891539	-0.0238188	-0.0951743	0.00747417
GABBR1	-0.101376	0.103556	0.0662436	-0.14521	-0.000145861	-0.133384	0.000109012
GALK2	-0.0649587	0.175511	-0.0903118	-0.128774	-0.125267	-0.185144	0.00014688
GALNT1	0.0750388	0.112347	-0.242397	0.00307428	-0.00946714	-0.178823	1.26801e-19
GALNT13	0.0582471	0.109899	-0.182931	0.000613569	0.0356392	-0.206157	2.8003e-15
GALT	0.0530328	0.132021	-0.0831881	0.00443309	-0.0983814	-0.203798	5.95592e-32
GATAD2A	-0.132482	0.0510325	0.136215	-0.00196254	-0.0407233	-0.0620735	1.72709e-18
GATB	-0.00911498	0.0962109	0.0949611	-0.0644169	0.0418353	-0.209275	1.46972e-06
GBP2	0.104579	0.0262392	-0.0315941	-0.0448286	-0.0401286	-0.0469889	1.84937e-12
GBP6	-0.0655678	-0.0208015	0.247663	-0.0631962	-0.000518162	0.0208147	0.000331319
GCLC	-0.0379656	0.116521	0.0450992	0.0341351	-0.222253	-0.116989	0.0225727
GDA	-0.104249	0.176462	-0.0473942	-0.124544	-0.0263758	-0.236598	2.07705e-19
GGH	0.105756	-0.0315012	-0.0382289	0.0629784	0.0541887	-0.0175465	0.00673615
GGTLC2	-0.00910831	0.121688	-0.0936092	-0.146632	-0.0584032	-0.130737	1.21411e-08
GGTLC3	0.0356683	0.0738289	-0.148694	-0.0752205	-0.00413722	-0.0917733	9.76176e-06
GID8	-0.00461592	0.0762963	-0.0911014	-0.070486	0.0196121	-0.110272	1.00547e-05
GIMAP7	-0.0364266	0.048829	-0.046849	-0.0605758	0.0062158	-0.0526397	0.00373066
GINS1	-0.0961733	0.180965	-0.277699	0.0428424	0.130377	-0.323634	2.79785e-16
GINS4	0.298396	0.26304	-0.156153	-0.0654128	-0.113281	-0.5017	2.79567e-18
GLRX3	0.0726424	0.100026	-0.120968	-0.0497269	-0.0776619	-0.133184	6.73624e-23
GLT8D1	-0.0986726	0.112903	0.041414	-0.0292931	0.0142542	-0.190259	0.000174022
GLTP	-0.179676	0.164586	-0.0901372	-0.159548	-0.0273269	-0.162256	3.50957e-08
GMEB2	-0.0811019	0.0851008	0.0442899	0.199716	-0.023117	-0.196599	0.00556069
GNA13	0.143576	-0.0372158	-0.027101	0.000695853	0.0501698	-0.00192525	0.0416206
GNA15	-0.0130781	0.0861537	0.0245462	0.0645234	0.00661319	-0.192179	0.00172863
GNAL	-0.00712609	0.0680042	-0.0404376	-0.0626121	-0.000490409	-0.0983987	7.97728e-16
GNB1L	0.105381	0.106101	-0.158288	-0.0805979	0.104335	-0.233548	5.01278e-13
GNG12	-0.0605634	0.0479249	0.105159	0.172439	0.055938	-0.181203	0.00568933
GNPNAT1	0.0381499	0.166262	-0.0586682	0.168116	-0.0453692	-0.350489	2.64801e-12
GOLGA2	-0.0595221	0.0782724	0.0597548	-0.103039	0.010456	-0.117513	6.89789e-11
GON7	-0.143338	0.112856	0.180524	-0.0741694	-0.0928476	-0.139017	0.00113792
GP2	-0.0671291	0.0698542	-0.0481892	-0.0720604	-0.0371932	-0.0549096	0.0421224
GP6	0.0790109	0.0115187	-0.237287	0.13579	0.1366	-0.105136	0.0296362
GPC1	-0.116936	0.0381094	0.133953	-0.0975788	0.0204697	-0.0442881	1.09909e-09
GPD1L	0.112847	0.0436428	-0.00411295	-0.026362	-0.0391147	-0.0973741	8.24109e-10
GRIA3	0.0298143	0.12791	-0.0126919	-0.0449998	0.0303594	-0.257463	2.53126e-08
GRIPAP1	-0.103173	0.0236059	0.0812853	-0.140199	0.051119	-0.0103162	7.09599e-07
GSDMB	-0.00569615	0.0840404	-0.0429766	0.0535746	0.00404641	-0.168461	0.000857398
GSDMD	-0.0889182	0.0025434	0.157995	-0.0648733	0.0150553	0.000196673	2.39477e-06
GSDME	0.172459	0.0555787	0.103537	-0.126457	-0.0379297	-0.140165	0.00111021
GSTM1	-0.0543934	0.085354	0.176681	-0.0841475	0.065062	-0.198356	8.98884e-14
GSTT1	-0.0550244	0.0706013	0.020407	-0.0230472	-0.0100634	-0.108605	1.10152e-19
GTF2F1	-0.0720143	0.0482953	0.0926677	-0.0155122	-0.0145222	-0.0778457	0.000321128
GTF3C3	-0.0412994	0.0517741	-0.0205006	-0.0483322	-0.0318579	-0.0472247	0.0277172
GTF3C4	-0.00230503	0.125189	0.179806	-0.0347912	-0.0723921	-0.239435	4.02055e-40
GTPBP4	-0.0662048	-0.0277883	0.0562319	0.062821	0.0731137	0.00597156	1.93334e-07
GYS1	-0.0270633	0.139763	-0.124252	-0.0534036	-0.108589	-0.154033	0.00424761
H2AX	-0.0142916	-0.0352989	0.0436927	0.129239	0.103878	-0.0330836	8.50194e-05
HAPLN1	0.0315952	0.161225	-0.224503	-0.0906244	0.223836	-0.35469	1.27994e-28
HDAC1	-0.0220717	0.056261	-0.00888052	-0.0497752	-0.0245589	-0.0696227	8.07904e-11
HDDC2	0.0517976	0.0238344	-0.0337216	0.0602633	0.118433	-0.138334	0.00166821
HDHD5	-0.0515463	0.0875276	-0.0737875	0.187762	-0.0931673	-0.141106	1.17615e-17
HEATR5B	0.0150886	0.104878	-0.0161559	-0.0506166	-0.0113819	-0.182646	1.9506e-14
HEBP1	-0.0444095	0.0290516	-0.0588451	-0.0449528	0.0325034	-0.0269365	0.00363863
HELZ2	-0.0230802	0.154	-0.16847	-0.0351002	-0.126058	-0.168188	1.05331e-07
HERC4	0.209329	0.0796615	0.0646624	-0.0686444	0.0223574	-0.24063	1.89894e-17
HES7	-0.0764208	0.11182	0.0518418	-0.0225573	-0.0204139	-0.18323	0.000955385
HGH1	-0.019196	0.0825791	-0.0550095	-0.0488876	-0.0203028	-0.11217	2.15673e-49
HIP1	-0.08737	0.0351176	-0.0575877	0.0184476	0.0239126	-0.0382432	0.0151097
HMGN1	-0.016991	0.113793	0.0512592	-0.202781	-0.0350261	-0.144781	5.66847e-10
HNRNPH3	0.0293874	0.0556312	-0.0292771	0.112772	-0.156229	-0.0647883	3.73745e-06
HNRNPK	-0.151477	0.0617833	0.0709765	0.0550442	-0.053976	-0.069728	0.0366685
HNRNPR	0.226763	-0.039292	0.0651358	-0.0446994	-0.0220195	-0.00122781	0.044942
HPGD	-0.0346233	0.0968205	-0.0998671	0.11217	-0.0349595	-0.165419	5.9451e-20
HPSE	-0.00433065	0.130647	0.0405443	-0.0673578	-0.0640863	-0.206977	7.74039e-38
HSD17B12	0.0955074	0.0937006	-0.107942	0.0562997	-0.0625967	-0.174452	9.81237e-14
HSPA12B	0.188741	-0.0317081	-0.00339683	-0.0689515	0.0332972	-0.00502124	0.00038423
HSPA4L	-0.0308289	0.0730556	-0.0491666	-0.0489537	-0.0210583	-0.0904175	0.000982917
HTATSF1	0.000690835	0.132563	0.0333553	-0.0673063	-0.136745	-0.172538	2.22554e-19
HTRA1	0.0345117	0.0387855	-0.0936571	-0.0786495	0.00268327	-0.0403224	1.50452e-07
IAH1	-0.0179245	0.155725	-0.1551	-0.0349049	-0.159488	-0.159461	4.0037e-09
IDH3B	0.091233	0.0324442	-0.137846	-0.0333705	0.0341346	-0.0688871	1.56281e-19
IDUA	0.104395	0.0278588	-0.0397358	0.152928	0.0770104	-0.172043	8.21121e-11
IFT27	-0.00336766	0.135942	-0.106509	-0.170987	-0.0497351	-0.154011	7.01731e-08
IGF2BP1	0.0280026	0.137276	-0.151498	-0.0914061	0.0511544	-0.234963	0.000236608
IGHG3	-0.118228	-0.0331332	0.252207	-0.0451307	0.119807	-0.00547229	0.012849
IK	-0.0834857	0.075462	-0.0334072	-0.0863525	0.0568476	-0.108338	4.6317e-08
IKBKB	-0.0296051	0.0503347	-0.0228979	-0.0830848	0.145968	-0.130741	0.0118978
IL18BP	0.0565579	0.0171751	0.0401024	0.089323	0.0438393	-0.116477	0.0077338
IMPDH1	0.0377372	0.156887	0.0136018	0.0617637	-0.0868573	-0.29559	1.60731e-20
INPP5F	0.00535357	0.0366625	-0.0323138	-0.0569252	-0.00143791	-0.0458522	0.0043629
INPPL1	0.08886	0.0821442	-0.0904771	-0.0873006	0.0144113	-0.149179	1.05739e-06
INTS2	-0.061279	0.0701737	-0.0449769	0.00345786	0.178885	-0.196056	1.89053e-18
INTS3	-0.0282891	0.138283	0.212047	0.0324277	-0.0212147	-0.311505	3.6165e-37
INTS4	-0.0249978	0.0630466	0.253991	-0.0470263	0.0455921	-0.187977	1.2152e-20
INTS7	-0.0623592	0.0396679	0.106861	-0.00688512	-0.0517769	-0.0516463	0.000261531
IRF2BP2	-0.0180588	0.208825	-0.0283946	0.191169	-0.230747	-0.32933	2.15538e-55
IRF2BPL	0.220523	0.10534	-0.120497	-0.0642258	-0.0269675	-0.221777	4.24106e-17
ISG20	-0.00308615	0.0580577	-0.0495025	-0.0246544	-0.0263585	-0.0767067	0.0365592
ISOC2	0.10841	0.062601	0.0367892	-0.012069	-0.0129047	-0.161376	0.000667281
ITGA5	-0.14794	0.100387	0.0648341	0.0108502	0.0145211	-0.166267	2.37543e-16
ITGAX	0.223655	-0.00348451	-0.0824168	0.140262	0.159315	-0.184719	3.75059e-19
ITLN1	0.0580017	0.0340082	0.227772	0.208209	-0.0206959	-0.20225	5.63646e-14
ITSN2	0.111246	0.143069	-0.107455	0.0640562	0.0375402	-0.33126	1.04192e-56
IWS1	-0.0848299	0.236065	-0.150491	-0.0904694	0.102054	-0.410796	8.63093e-50
IYD	-0.127227	0.0675181	0.0918128	0.193266	0.0156665	-0.175789	0.00541612
JAM2	0.0790644	0.146424	-0.0896347	-0.0704296	-0.132123	-0.19848	2.30257e-14
JAML	-0.0773078	0.07754	0.0461365	-0.0078318	-0.0601867	-0.0987616	5.15185e-45
JPT2	-0.108479	0.0386786	0.0245573	0.0227223	-0.000831358	-0.0469032	0.000333775
KARS1	0.0134127	0.0645127	-0.0212624	-0.133972	0.0764026	-0.12229	2.93085e-06
KDELR2	-0.0303077	0.066378	-0.0664896	0.0741008	0.0169615	-0.132061	0.00197034
KEAP1	-0.0638439	0.151147	0.0296399	-0.0107804	-0.064747	-0.238795	0.0216377
KIAA0930	0.0647038	0.0192172	0.0690683	0.0493999	0.0838621	-0.139495	0.00039423
KIF13A	-0.0256234	0.0469274	0.00548904	-0.0515291	0.00260432	-0.0676715	1.67601e-11
KIF5A	0.080236	0.0831349	-0.132714	0.104519	0.0426659	-0.212315	8.86059e-14
KLC1	-0.0807318	0.0842503	0.260172	-0.00146668	0.0658433	-0.23456	7.86603e-19
KLK11	0.174282	0.0564127	-0.0404069	0.166291	-0.0941812	-0.167919	1.27376e-15
KPNA2	0.0372693	0.0875372	-0.116996	0.00449054	-0.0487253	-0.128965	0.0020735
KPNA3	-0.0345812	0.0802372	-0.0148568	-0.0634429	-0.0362692	-0.0992752	4.21545e-06
KPNA4	-0.0619581	0.104739	-0.079627	-0.0865787	-0.0198983	-0.120736	1.22824e-17
KRT222	-0.134516	-0.0331331	0.224464	0.000518569	0.0836571	0.0125148	0.00163126
KRT33A	-0.13036	0.223603	0.119212	-0.0735706	-0.169502	-0.302329	4.35958e-37
KRT82	-0.032641	0.043304	-0.031507	-0.0317179	-0.0309065	-0.0369881	0.00580057
KRT83	-0.110001	0.0359641	0.137182	-0.0685734	0.0071211	-0.0457612	0.00357805
KRT85	-0.0450896	0.0486376	0.0941092	-0.0961551	-0.016231	-0.0627032	0.0424366
KRT87P	-0.0642132	0.104156	-0.05042	-0.00625092	-0.0477404	-0.137134	2.72138e-28
KYAT3	0.192179	0.0438064	0.0523477	-0.0602562	-0.0297901	-0.136706	7.53413e-11
L2HGDH	-0.0131685	0.0603208	-0.125857	0.0698599	0.0127191	-0.107774	0.0285557
LACTB2	-0.0501641	0.118469	0.0625041	0.109067	-0.085356	-0.216334	2.90468e-17
LAIR1	0.00584095	0.0244248	0.134967	-0.0947741	0.186196	-0.152644	0.015934
LAMA2	-0.0303682	0.00117452	-0.0118668	0.084172	0.00967083	-0.0193555	0.0286101
LAMTOR1	-0.0270858	0.0221006	0.273405	-0.059406	0.00771851	-0.0891219	1.42783e-22
LAMTOR2	-0.0771497	0.0675567	0.159852	-0.00571992	-0.0553353	-0.112369	0.000126962
LANCL2	-0.0345565	0.0517585	-0.0319246	-0.0454121	-0.0126735	-0.0577813	7.40867e-08
LARP4B	0.131331	-0.00472631	0.106151	-0.044501	0.0741342	-0.0932713	0.0329151
LARP7	0.0262383	0.042037	0.0527926	-0.0673973	-0.0153862	-0.0757438	2.63545e-05
LARS2	-0.0525899	0.0684256	-0.0244852	-0.043113	0.00519857	-0.0952816	1.42779e-17
LBR	-0.173773	0.0351503	-0.0185362	0.0230535	0.114192	-0.064624	0.0109976
LCLAT1	-0.116858	0.14875	-0.0998713	-0.107434	-0.0636259	-0.15028	6.75315e-14
LCN2	0.335902	-0.0480914	0.14029	0.0972254	-0.0259103	-0.0880352	0.000649431
LCP2	-0.109766	0.11597	0.106021	0.129522	-0.0175473	-0.242345	4.95519e-22
LDB3	-0.0153157	0.0995205	0.0750298	-0.0606128	-0.129295	-0.119373	0.00455153
LDLRAP1	-0.0506497	-0.00288102	-0.0649705	0.148309	0.0248234	-0.0181981	0.000585289
LEMD2	0.224642	0.0153117	-0.140746	-0.121749	-0.0154701	-0.0315485	0.0103874
LIG4	-0.0397994	0.0849749	-0.0445972	-0.0505345	-0.0164364	-0.11322	5.97052e-33
LILRA3	-0.0338305	0.0769868	-0.0446685	-0.0662094	-0.00245942	-0.102387	4.27412e-07
LIMS1	0.141272	0.0810803	-0.117169	-0.0556644	-0.0520503	-0.135109	1.97998e-34
LIPF	-0.0524651	0.0615709	-0.0298183	-0.0131917	-0.0205691	-0.0765774	0.0147599
LLGL1	-0.0829772	0.0534373	0.0679119	0.177382	-0.0489191	-0.120099	0.000729292
LOXL1	0.0958408	0.116109	-0.134395	0.179277	-0.0330646	-0.265489	1.40327e-13
LPAR1	0.141248	0.156517	-0.21193	0.157771	0.0435443	-0.374225	1.09254e-17
LPCAT1	-0.0615539	0.0687052	-0.0638679	0.0377564	-0.0343482	-0.0869301	1.26192e-11
LPP	0.0353115	0.02527	-0.065975	-0.0673493	0.0321458	-0.0407324	0.000169141
LRCH4	-0.0673395	0.0734204	-0.0174899	0.0263518	-0.055803	-0.0910806	0.0053637
LRPPRC	0.233375	-0.0687005	0.0834592	0.13943	0.165367	-0.10829	0.00687207
LRRC59	-0.0760337	0.0652828	0.113365	-0.188704	-0.0476904	-0.04242	0.00819981
LRRC8A	-0.0108516	0.0962988	-0.0827502	0.00877131	0.0128302	-0.170321	4.14603e-06
LRRK2	0.0927836	0.158189	0.0141156	0.19567	-0.0692366	-0.370738	1.89442e-44
LRSAM1	-0.0329813	0.0317268	-0.0546942	0.0374879	0.108654	-0.103637	0.0461485
LRWD1	-0.0473044	0.0349934	0.0479055	-0.104986	0.0503181	-0.0555761	0.0262145
LSG1	-0.0950702	0.0845692	-0.0770307	0.0962969	0.0631175	-0.171251	0.0043378
LSM5	0.140912	0.156856	-0.119952	-0.0917844	0.118742	-0.359368	2.55099e-29
LSM7	0.0565638	0.0408031	0.0422021	0.146257	0.0125769	-0.164357	0.000402901
LSP1	-0.0481379	0.0125622	0.0614968	-0.0677104	0.0112693	-0.00662058	0.00316552
LSS	-0.167565	0.140793	0.0573326	-0.185241	0.0486692	-0.191067	5.09608e-11
LTN1	-0.0934685	0.069741	0.321474	-0.117549	0.0772292	-0.186897	6.96751e-15
LUC7L	-0.0844898	0.146149	-0.137579	-0.16479	-0.0865318	-0.117509	0.0341863
LUC7L3	-0.000281293	0.0756878	0.111685	-0.122391	-0.0431759	-0.114219	0.00268511
LYAR	-0.0397558	0.0807225	-0.119815	-0.111003	-0.0252346	-0.0616333	6.12913e-06
LYPLA1	0.0631205	0.0864946	-0.0675447	-0.0802695	0.0501637	-0.174839	8.00373e-16
LYRM4	-0.0668478	0.104294	0.0250698	0.079141	-0.0334986	-0.190582	0.00087603
MACC1	0.193147	0.123971	-0.1859	-0.0924119	0.118324	-0.297876	9.66435e-19
MACROH2A2	-0.0613461	0.124954	-0.0614285	0.0456712	-6.92e-05	-0.217108	9.57824e-40
MAGOH	-0.126871	0.0687542	-0.0427896	0.158167	0.129789	-0.1921	2.24448e-10
MAGOHB	-0.119586	0.0661109	-0.0300378	0.145595	0.122971	-0.185511	3.57228e-10
MAN2A1	-0.109678	0.0193608	0.0688172	-0.00471456	0.0944499	-0.0619932	0.00884711
MAN2B2	0.00365279	0.066489	-0.0568892	-0.0603247	0.0562549	-0.125816	8.88337e-19
MAP2K4	-0.0982938	0.0874265	-0.0637812	-0.125383	0.0352261	-0.0942596	0.0274555
MAP2K7	-0.0538312	0.063652	0.012161	0.132592	0.0502559	-0.17437	0.00580057
MAP6	-0.0539303	0.0211098	-0.00766573	-0.030835	0.02539	-0.0220183	0.0118978
MAPK10	-0.0678862	0.0512251	0.0257386	0.0294152	-0.0399629	-0.068459	0.0141599
MAPK11	-0.0516039	0.0503004	0.0392556	-0.0541038	-0.0334104	-0.053408	0.0188199
MAPK12	-0.0593885	0.0460111	0.0294787	-0.0619895	-0.0225705	-0.0428011	0.0198049
MAPK13	0.107726	0.0116818	-0.0486515	-0.0821079	0.068665	-0.0609429	0.000165615
MAPK8IP3	0.215351	0.257654	-0.255638	-0.106628	0.0954254	-0.530488	5.69467e-38
MAPRE1	-0.0186195	0.100439	0.20054	-0.0350787	-0.0891507	-0.181818	0.000171775
MARCKSL1	-0.111358	0.041492	0.0380532	-0.0653319	0.0526227	-0.0550377	0.0151097
MARCO	-0.0533657	0.0610239	0.215056	-0.129103	-0.104166	-0.0584586	1.02216e-06
MARK3	-0.0916168	0.0694573	-0.0454628	0.122041	0.0577917	-0.156869	0.0057342
MARS1	-0.0309108	0.0291406	0.235485	-0.0921542	-0.0340706	-0.05909	0.00926121
MBD3	-0.0229477	0.095246	0.234387	0.071205	0.0248566	-0.272488	5.71821e-23
MBLAC2	-0.024729	0.0447998	-0.0325129	-0.0251971	-0.0356217	-0.0422079	0.00013547
MBP	0.0332827	0.0657987	0.134886	-0.0904931	0.0558055	-0.175975	0.000664515
MDH1	-0.0508582	-0.0313025	0.0686558	0.10978	0.0743597	-0.0117901	0.00188304
MED16	-0.0612739	0.0824992	-0.063377	0.0250439	-0.0887232	-0.0812756	0.0209035
MEMO1	-0.0397277	0.0990659	-0.127763	-0.0858402	-0.068721	-0.0801936	0.000402171
MESD	-0.0262585	0.131136	-0.101084	-0.0209103	-0.116162	-0.149968	6.19899e-18
METTL17	0.0635772	0.0414583	0.145234	0.116075	0.131785	-0.248288	4.1441e-15
MFN1	-0.0908058	0.0584777	0.204481	-0.197855	0.0556431	-0.0988323	0.00303123
MGAT1	-0.0718973	0.0675035	0.0220123	0.0329384	0.0343063	-0.137649	4.15453e-07
MGLL	-0.138624	0.0514643	0.0552432	0.1239	-0.107899	-0.043941	0.00969444
MMP7	-0.138837	0.104206	-0.140762	0.07023	0.151672	-0.214359	4.86711e-15
MORC3	-0.10272	0.047736	-0.0483399	-0.0261493	0.00334624	-0.0343565	0.00118347
MORF4L1	-0.0905811	0.0612481	0.0711266	0.120395	0.0104096	-0.146349	0.00560927
MPP5	0.0964416	0.180028	-0.17765	0.068106	-0.0699127	-0.323704	4.03219e-24
MPP6	0.0842188	0.133834	-0.0360949	-0.12074	-0.0829387	-0.199966	2.89481e-10
MRE11	0.022828	0.0360842	0.214734	0.0329757	-0.0426385	-0.122578	2.34194e-06
MRI1	0.0777773	0.0383564	0.0026649	-0.0956193	0.107006	-0.130512	2.66096e-45
MRPL13	-0.023252	0.0549443	-0.12127	0.118102	0.0793902	-0.145034	0.0211181
MRPL23	0.020127	0.159386	0.251802	-0.00849641	-0.0045155	-0.376956	6.05543e-56
MRPL45	-0.0618005	0.0681727	-0.0498561	-0.0588162	-0.0316538	-0.0603399	0.0107665
MRPL46	0.0170001	0.0302694	-0.081602	-0.0078644	0.150038	-0.120174	1.48628e-06
MRPS16	0.0414336	0.146872	-0.131952	0.0325216	0.0665244	-0.31101	1.58952e-38
MRPS17	0.086601	0.114717	-0.0169998	-0.1688	-0.104444	-0.142325	0.00688314
MRPS27	-0.0691369	0.079973	0.12994	-0.0981607	-0.0217412	-0.120084	0.000229766
MRPS36	-0.0816188	0.086054	-0.0358961	-0.0295141	-0.00188444	-0.116009	0.0022938
MSH6	-0.0588563	0.0763328	-0.0127858	-0.0404024	-0.0447644	-0.0858624	1.73283e-35
MSLN	-0.0500654	0.0833992	-0.0807551	-0.047549	-0.081436	-0.063615	0.0268931
MST1R	-0.0704736	0.124545	-0.0463516	-0.036106	0.029343	-0.206389	5.98591e-12
MTARC2	0.0217229	0.102595	-0.0146343	0.0516071	-0.00935057	-0.21453	2.69512e-06
MTFR1L	0.023343	0.154643	-0.0934195	-0.148076	-0.0483775	-0.21174	3.20701e-08
MTHFD1L	0.0155014	0.148071	0.042669	0.0590095	0.00405688	-0.324583	1.17082e-26
MTHFD2	0.00769986	0.289574	-0.19123	-0.0044336	-0.100043	-0.459877	9.34374e-29
MTM1	-0.0222849	0.108809	-0.103363	0.0521315	-0.00411037	-0.189641	4.34613e-22
MTMR6	0.174622	0.0782472	0.0983492	-0.120565	-0.0321469	-0.188439	1.53222e-08
MTR	-0.069091	0.0738705	-0.0619651	-0.102576	0.0692238	-0.104643	0.00738163
MTX1	-0.0655039	0.171908	-0.118994	0.0459488	0.0565766	-0.321319	5.22502e-48
MUC4	-0.105489	0.0717898	-0.0370502	0.0434958	0.0770761	-0.143619	0.00573088
MUC5AC	-0.108461	-0.00189915	0.227046	0.108112	-0.0494318	-0.0225961	0.00127155
MX2	-0.081473	0.0830151	-0.066586	-0.0640583	0.11198	-0.151107	8.54451e-05
MXRA8	-0.075748	0.0759213	0.00474851	0.140467	-0.0721142	-0.126044	0.005434
MYEF2	0.00169384	0.125866	0.0436241	-0.111339	-0.0171789	-0.211559	1.82183e-11
MYL4	0.12325	0.182636	-0.037782	-0.0762683	-0.0531504	-0.338575	5.92949e-26
MYO5A	-0.0578326	0.053809	0.144058	-0.0877437	0.00898688	-0.0968303	0.000999094
MYOC	-0.13972	0.0639206	-0.129525	-0.115657	0.103229	-0.0546886	7.42697e-05
MZT2A	0.054677	0.108936	-0.106014	0.110437	-0.00492825	-0.236404	5.36336e-53
MZT2B	0.027739	0.101293	-0.0784385	-0.00221134	0.0117904	-0.191743	7.19359e-54
NADK2	-0.0627559	0.0706245	0.0125072	0.0113249	-0.0383025	-0.0996786	0.000544011
NAGA	-0.0706421	0.0607477	0.0768881	-0.0520637	-0.0716228	-0.0567922	2.86929e-12
NAT10	-0.0402813	0.0233355	0.00862027	-0.0611254	0.0432853	-0.0355859	0.00443573
NBEA	-0.0703538	0.0741264	-0.0441185	0.00252958	-0.0343712	-0.0880916	1.54064e-21
NBEAL2	-0.105765	0.0884735	-0.0679047	0.0374745	0.0538745	-0.153676	7.3135e-26
NCDN	-0.109553	-0.00033726	0.0225082	0.0705979	0.11679	-0.0473679	0.00115085
NCKIPSD	-0.0379209	0.0774403	-0.0164015	-0.0192007	-0.0564667	-0.0955602	1.09805e-05
NDRG2	0.0346465	0.0335723	0.010264	0.00910764	0.0364897	-0.102908	0.00330554
NDUFA2	-0.0545823	0.046221	-0.00915978	-0.00429115	-0.00640345	-0.0616952	0.00560927
NDUFB11	-0.0821612	0.0700623	-0.0206253	-0.0160706	0.00905072	-0.0988137	0.00564361
NDUFB5	0.106155	0.0960066	-0.0324743	-0.062486	0.00192551	-0.199004	2.01831e-07
NDUFB9	-0.152868	0.0709706	0.18006	0.149675	-0.0304648	-0.157733	0.00530469
NDUFS4	0.298959	0.0463766	-0.0636301	-0.0486087	-0.025103	-0.158093	3.39643e-11
NDUFS6	-0.0919933	0.0928454	-0.0473476	-0.0874266	-0.0110874	-0.0990876	3.02927e-08
NDUFV2	-0.0339519	0.0651083	-0.0368179	-0.062547	0.0386917	-0.104174	0.00576592
NECTIN1	0.0294978	0.0407368	-0.0883269	-0.0137164	0.113127	-0.122181	0.000408087
NEDD1	-0.0286345	0.0644619	-0.026643	-0.0572188	-0.0243469	-0.0761398	1.23596e-35
NEGR1	-0.0779811	0.0567964	0.215638	-0.076942	-0.0637226	-0.0788367	0.0271529
NEK9	-0.0589261	0.0864475	-0.0375771	-0.0704099	-0.00738122	-0.109122	0.000106104
NELFB	0.2362	0.0680146	-0.0317087	-0.147951	0.00450518	-0.168667	0.000900418
NELL2	-0.0349134	0.0436547	-0.0381014	-0.0294213	-0.0263966	-0.0381816	4.11803e-08
NEXN	-0.0241443	0.0991876	0.221771	0.157146	0.0266508	-0.304495	4.86179e-28
NF1	-0.0711536	0.0864774	-0.0131721	-0.0738241	0.00711868	-0.117449	3.1054e-06
NGLY1	-0.00205584	0.126626	0.0103918	0.058408	0.0949464	-0.315556	5.21475e-09
NOLC1	0.0102507	0.108925	-0.136897	-0.0179166	0.166802	-0.261161	4.25688e-23
NOP2	-0.0364874	0.0565633	0.0972755	-0.109783	0.0624692	-0.119206	0.00519119
NPL	0.107667	0.0750048	0.0129293	-0.100976	-0.0852841	-0.112731	0.00021125
NPRL3	0.127587	0.0258713	0.0891687	-0.139169	0.0958805	-0.128178	0.00593352
NPTN	-0.0458677	0.0392334	0.140314	-0.0849344	0.160443	-0.152672	4.496e-05
NQO1	-0.0811845	0.121741	-0.0919576	0.16166	-0.00931292	-0.227211	8.86824e-16
NT5C2	0.0494037	0.0715466	-0.0134427	-0.0308159	0.13795	-0.216583	8.16552e-53
NT5C3A	-0.110848	0.077786	-0.0335684	0.196216	-0.0459565	-0.13772	0.00523591
NT5DC1	0.125538	0.133071	-0.0983424	-0.06173	-0.158284	-0.176979	0.000275551
NTS	0.124496	0.135536	-0.0274327	0.159823	0.0696963	-0.389759	7.64181e-17
NUBP2	-0.0627894	0.053912	0.0503524	-0.0261924	-0.0116743	-0.0793054	0.0300659
NUDCD3	0.286807	0.0342	-0.0619812	0.0945364	-0.023646	-0.176359	1.62657e-30
NUDT16L1	-0.0678332	0.0181105	0.0426894	0.0347045	0.146195	-0.1083	0.0301128
NUDT6	-0.0658493	0.0897882	-0.0626901	-0.103001	-0.0186757	-0.0901707	2.57996e-45
NUP210	0.157903	0.0961382	-0.0771168	-0.101938	-0.0212147	-0.182609	8.05307e-55
NUP35	0.0744912	0.112942	-0.0614224	0.0182165	-0.0264415	-0.222843	5.8708e-08
NUP37	0.176909	0.0769751	-0.105395	0.0745651	0.0306792	-0.228421	2.62695e-13
NUP54	-0.0638261	0.106629	-0.0158772	0.0236308	-0.0621211	-0.15297	0.00429352
NUP62	-0.0787155	0.0957052	-0.0591874	-0.0458554	0.018082	-0.135055	1.60068e-21
NUP88	0.0020936	0.0732278	-0.0390248	0.0990913	-0.0271861	-0.14948	0.00583693
NXF1	0.24995	-0.0206568	-0.0272675	0.0648407	0.14027	-0.141964	7.68637e-13
OAS3	-0.0739168	0.128798	-0.102218	-0.0584623	-0.0790169	-0.134714	6.83114e-09
OAT	-0.0708604	0.0408723	0.0466345	0.155392	0.0786891	-0.154939	3.49892e-15
ODR4	-0.123751	0.0739204	0.00534865	-0.040821	0.136715	-0.156566	0.000747586
OGA	-0.0329095	0.045391	-0.0316691	-0.0365719	-0.0349561	-0.0372222	6.62941e-05
OGT	0.0355898	0.164865	-0.0772544	-0.0854057	-0.12385	-0.220542	0.0201934
OLA1	-0.0486961	0.0399026	-0.0769579	0.0119662	0.0171125	-0.0515078	6.84787e-06
ORC3	-0.106209	0.07451	0.167372	0.174382	-0.0786244	-0.161478	4.16736e-15
OSBPL10	0.0118922	0.0629802	0.0598353	0.0173267	0.0420779	-0.169698	0.00564361
OSBPL8	-0.101159	0.0874777	-0.0419643	-0.0848576	-0.0595317	-0.0619637	0.0160043
OTUD7B	-0.0376054	0.0593839	-0.000909496	0.157534	0.0842971	-0.194633	1.5031e-14
OTULINL	-0.106912	0.070977	0.117264	0.0833121	-0.0121275	-0.147457	0.00546246
OXNAD1	-0.0598556	0.110858	-0.0916746	-0.0314096	-0.0294616	-0.142659	0.00133419
OXR1	0.0138991	0.0544249	0.0164049	-0.0539966	-0.0570068	-0.0679193	1.81103e-05
P4HA2	-0.0450865	0.0418723	0.0781162	-0.0203026	-0.00420355	-0.0757371	7.48062e-15
PA2G4	-0.0391465	0.0179734	0.192752	-0.0979425	-0.0524581	-0.0116926	0.00231601
PADI2	0.198425	-0.0589494	0.199284	0.0348182	0.0583476	-0.0547905	0.0224308
PAK1	0.09157	0.0269519	0.0262204	-0.0799851	0.0220821	-0.080102	0.0151097
PALLD	-0.0887791	-0.0125179	0.186381	-0.0167894	0.0944399	-0.0350274	0.00309636
PALM	0.129117	0.0291974	-0.0496443	-0.0211794	-0.0422024	-0.063708	7.29839e-15
PAPOLA	-0.00362367	0.0565272	0.00939475	-0.126989	0.112119	-0.129341	0.0294111
PARP4	0.00310019	0.0800881	0.0228592	0.0403863	-0.0926602	-0.126311	3.93379e-05
PARVA	-0.0568874	0.0418201	0.131833	0.109375	-0.00762132	-0.124379	0.00331917
PARVB	0.0607673	0.0639908	-0.104455	-0.0722114	-0.0293252	-0.081494	2.08296e-17
PCCA	0.125233	0.0161053	0.174134	-0.0850395	-0.0533565	-0.0691988	5.81687e-07
PCYOX1L	-0.0080324	0.0478243	-0.0312535	-0.044084	-0.0355912	-0.0487735	2.12311e-06
PCYT2	-0.115153	0.0972255	0.153441	-0.0468571	-0.119599	-0.106948	2.72456e-16
PDCD11	-0.0362259	0.0823558	0.00969547	-0.0176646	-0.0268416	-0.128591	4.42432e-43
PDE4DIP	-0.0910442	0.0666132	-0.0756901	0.130532	0.0133302	-0.123005	0.000582873
PDE5A	-0.113408	0.0980186	-0.0117105	-0.0940282	0.0783841	-0.155225	1.10654e-12
PDE8A	-0.0950215	0.117863	0.00824042	0.0548042	-0.0581086	-0.181149	0.00561693
PDIA2	-0.066723	0.0373225	0.203899	-0.1566	0.0404535	-0.0719062	1.4867e-05
PDIA5	0.0484071	0.0704108	0.0808304	-0.127158	-0.131383	-0.0665477	6.3829e-07
PDS5B	-0.0340244	0.0543503	0.201088	-0.0222468	-0.0762089	-0.0977137	6.20546e-20
PDXDC1	-0.0550813	-0.0241817	0.184917	0.010414	0.0374835	-0.0035024	8.16151e-05
PDZD11	-0.0229776	0.0495869	0.027729	-0.0491689	-0.0432914	-0.0562473	0.0209035
PEAK1	-0.0371451	0.0813	-0.0667467	0.0391078	-0.0399223	-0.117331	1.3107e-56
PEBP4	-0.136214	0.0783177	-0.0808161	-0.0416857	-0.0357657	-0.046931	0.000688135
PECAM1	0.167126	-0.0364047	0.196758	-0.0641809	0.0978804	-0.075397	0.0358823
PEF1	-0.0863853	0.0592266	0.191374	0.119665	0.0100115	-0.174955	0.00563401
PES1	-0.0135874	0.117479	-0.0538571	0.0146028	0.0268789	-0.22707	8.74271e-17
PEX19	-0.121756	0.112768	-0.034684	0.00866682	0.0336978	-0.183611	1.90872e-10
PEX5	-0.0440004	0.0391623	0.0414049	-0.055774	-0.00193873	-0.0512981	1.75791e-05
PGM3	-0.00861195	0.173776	-0.20099	0.0115993	0.0582996	-0.315178	6.27764e-41
PGRMC1	0.0426806	0.0938177	0.0179508	-0.0903581	0.0524429	-0.201577	9.40395e-10
PHF21A	0.0278292	0.080235	0.00534314	-0.040141	-0.00722376	-0.150859	7.23954e-55
PHF6	-0.0167536	0.0439779	-0.0276204	0.170121	0.0630032	-0.158526	0.00570085
PHKB	0.0304978	0.0984373	-0.0417282	-0.0416888	-0.0701931	-0.141254	1.58332e-14
PHLDB1	-0.0573479	0.105884	-0.0218003	-0.0394664	-0.0458234	-0.141057	2.60167e-12
PI4KA	0.0308014	0.117302	-0.0952258	0.106965	-0.126532	-0.181337	1.14094e-08
PIH1D1	-0.0408734	0.0527889	-0.046758	-0.0386263	-0.0261328	-0.0485808	0.000219172
PIK3R1	-0.0454476	0.0455003	0.289252	-0.0450427	-0.0520718	-0.104719	0.00303861
PIPOX	-0.0815103	0.0980883	0.0241893	0.0212527	-0.0270288	-0.157866	0.00578641
PITPNB	-0.0640155	-0.0235609	0.162437	-0.123619	0.0834346	0.0227754	0.00188656
PITRM1	-0.171614	0.0329587	0.176213	0.055143	-0.0353019	-0.043562	0.021426
PKP4	-0.04351	0.0524174	0.207359	-0.0606868	-0.0572991	-0.0897927	6.22591e-07
PLA2G7	-0.0182517	0.0125124	0.0322517	0.181986	-0.116205	-0.0221785	0.00616092
PLCD1	0.147091	0.0728616	-0.0119429	0.00497121	-0.0415199	-0.173558	4.31882e-05
PLCG1	-0.0336361	0.0295765	0.126481	-0.0886816	-0.00567982	-0.0464871	0.0265557
PLEKHA5	-0.0937934	0.0795786	-0.122209	0.00669076	0.174287	-0.180391	3.19815e-18
PLPP3	0.159852	0.203907	0.0257872	0.117804	0.00155942	-0.500371	8.25855e-36
PLXNA4	0.017964	0.0513656	-0.0132196	0.0477217	-0.0572612	-0.0878386	0.000759349
PM20D1	-0.0499039	0.0859883	-0.0145435	-0.0563193	-0.0113365	-0.120041	1.35956e-09
PMM2	-0.145492	0.126132	-0.0361141	0.0159538	-0.0234248	-0.172389	4.10363e-11
POLD1	-0.00630599	0.0406127	-0.0513385	-0.0458131	0.13886	-0.121383	6.39368e-05
POLR2C	0.0241018	0.0722842	-0.0941359	-0.0861324	0.0655499	-0.131809	0.0119214
POP1	-0.0811503	0.076458	-0.0462121	-0.0214653	-0.0122374	-0.0920127	4.22708e-07
PPFIA2	-0.064909	0.0723665	-0.130197	0.0814204	0.166647	-0.194913	1.11286e-10
PPFIA4	-0.059772	0.0812511	-0.0739722	0.084026	0.182508	-0.237899	9.26267e-09
PPFIBP2	-0.0963335	0.090434	-0.0962559	-0.0961431	0.0728937	-0.121404	0.0009754
PPIAL4A	0.293137	0.0962275	-0.0599267	-0.0237153	-0.105749	-0.218876	7.72058e-27
PPIAL4C	0.0170483	0.146435	-0.0262461	0.00378535	-0.0959646	-0.23398	1.03296e-22
PPIAL4D	0.293137	0.0962275	-0.0599267	-0.0237153	-0.105749	-0.218876	7.72058e-27
PPIAL4E	0.293137	0.0962275	-0.0599267	-0.0237153	-0.105749	-0.218876	7.72058e-27
PPIAL4F	0.293137	0.0962275	-0.0599267	-0.0237153	-0.105749	-0.218876	7.72058e-27
PPIAL4G	0.0523337	0.157253	-0.0812209	0.00681479	-0.0891933	-0.258498	8.00864e-19
PPIAL4H	0.0170483	0.146435	-0.0262461	0.00378535	-0.0959646	-0.23398	1.03296e-22
PPIE	-0.0984432	0.107312	-0.0215021	-0.0796187	-0.117985	-0.0776744	0.0418254
PPIF	-0.0497346	0.117557	-0.0955518	-0.0419429	-0.093213	-0.121618	5.09998e-06
PPIL1	0.158448	0.0626197	-0.0238904	-0.0901077	-0.0388542	-0.126252	3.40735e-08
PPME1	0.059711	0.118243	0.00461631	-0.0977183	-0.0166286	-0.21323	6.70148e-33
PPP1R12C	0.0411061	0.0609395	0.0629573	0.0590454	-0.0216536	-0.157334	5.5254e-07
PPP1R14A	-0.0302518	0.0806382	-0.0339217	0.00282322	0.0389301	-0.157207	0.0058777
PPP2CA	-0.0248565	0.0218356	0.131191	-0.0680588	0.116824	-0.106975	0.00182725
PPP2CB	-0.0313059	0.0196522	0.0956859	-0.0254941	0.0762183	-0.08315	3.66983e-08
PPP2R2C	0.121622	0.0946638	-0.125549	-0.124864	0.0296425	-0.172838	0.00458687
PPP2R5D	0.00736444	0.118716	0.0809552	0.0125822	0.0789328	-0.29931	5.3901e-53
PPP4C	0.0274421	0.129037	-0.16093	0.0304356	0.0353226	-0.246538	3.60661e-18
PPP6C	-0.0680881	0.0881328	0.0232514	-0.0830673	-0.00263824	-0.123269	0.0123298
PPT1	-0.0431572	0.098624	-0.0622669	-0.083154	-0.0210301	-0.121042	3.87496e-12
PQBP1	-0.0824981	0.0697598	-0.0238307	0.0700791	-0.0264956	-0.105819	0.000212432
PRAG1	0.253904	0.0173301	-0.0457514	-0.0606736	-0.00637418	-0.0954361	0.00122892
PRDX1	-0.0402072	0.0133042	-0.0178968	-0.0603832	0.0789623	-0.0282581	0.0361128
PRIM2	-0.00266272	0.137108	-0.139737	-0.0597667	-0.0947346	-0.159381	1.33637e-27
PRKAA2	-0.106438	0.108076	0.0832005	-0.0512086	0.0379408	-0.194387	3.10501e-07
PRKAG1	-0.0546199	0.14062	0.0863249	0.0111122	0.156577	-0.359967	5.63861e-43
PRKCB	-0.0427668	0.0179932	-0.110602	-0.0347434	0.0802075	-0.0209464	0.0136436
PRKCD	-0.104145	0.0780903	0.0243869	-0.0962604	-0.0825479	-0.0442536	1.13396e-07
PRKD2	-0.0767004	0.0860311	-0.0815586	-0.120097	-0.0241607	-0.0655651	0.0106621
PRMT3	0.0384578	0.0672507	-0.017391	-0.0434722	0.0571005	-0.156575	2.38207e-13
PRPF3	-0.000743037	0.0675322	-0.0632879	-0.131518	-0.0434042	-0.0495978	0.000552777
PRPF31	0.173888	0.0588874	-0.00897626	-0.116571	-0.0691574	-0.104474	1.21226e-05
PRPF40A	-0.0472068	0.0065321	0.0783895	-0.0925745	0.0453212	-0.00974051	0.00113677
PRPF4B	-0.0773471	-0.032434	0.255543	0.0210725	0.0416047	-0.00303211	0.00593271
PRPSAP1	-0.0531012	0.0995852	0.0172998	0.192916	0.0853206	-0.28309	1.93685e-19
PRRC1	-0.0155335	0.0396399	-0.0292601	-0.043488	-0.00409887	-0.0473399	0.000534287
PRRC2C	-0.0120411	0.059688	0.0843476	0.0423004	-0.0742938	-0.107356	0.00587172
PRRX1	-0.0810212	0.136625	0.0282992	0.0461779	0.02081	-0.26679	2.63036e-08
PRSS8	-0.0889329	0.0685436	0.0310005	-0.0477084	0.0637951	-0.125545	0.0293406
PRXL2A	-0.0414442	0.0644162	0.165829	-0.0128341	-0.00326333	-0.146519	0.000380445
PSMB2	0.229901	-0.0769874	0.0585196	0.0323053	0.0287485	0.0212768	1.98673e-06
PSMD8	-0.0620959	0.0686636	-0.0173119	-0.0996488	0.0323845	-0.0904214	2.38143e-05
PSME3IP1	0.0344664	0.0531878	-0.0755	-0.0956526	0.0372354	-0.0857229	4.26766e-05
PSMF1	0.118735	0.0580658	-0.00531066	0.00364028	-0.00012196	-0.157214	0.00115274
PTBP3	-0.0276356	0.0472984	-0.0164522	-0.062904	-0.0266635	-0.0429201	0.0263927
PTGES3	-0.0629258	0.072703	0.0382455	0.0427115	-0.0772229	-0.0998184	2.51072e-07
PTPN12	0.123245	0.0256949	0.101104	-0.0202747	0.0849647	-0.161159	9.08354e-12
PTPN13	-0.0259628	0.0500318	-0.0514425	-0.039994	-0.0179278	-0.0515575	2.83722e-07
PTPRA	-0.119419	0.107271	0.0527459	0.0885995	-0.0872757	-0.15834	0.00257039
PTPRE	-0.0140323	0.0470298	-0.0459955	-0.053756	-0.0204216	-0.0460287	0.0387897
PTPRG	-0.163813	0.0512597	-0.010641	0.0503352	0.0642175	-0.0840183	0.0189669
PTPRZ1	0.106255	0.0761497	-0.118578	-0.0332329	0.00912442	-0.151157	1.92415e-16
PTRHD1	-0.00771595	0.176787	-0.0831476	-0.111265	-0.0848889	-0.237968	1.75337e-13
PTX3	-0.0067417	0.0419679	-0.0351865	-0.0495873	-0.0175025	-0.0446639	7.99802e-08
PUF60	-0.0941209	0.0646944	0.000573305	-0.0645326	0.094586	-0.119051	0.00622676
PURA	-0.0550051	0.100726	-0.0901476	-0.0538792	-0.0380199	-0.11367	0.00318824
PXN	-0.0356253	0.0517837	-0.037535	-0.0378567	-0.0329641	-0.0476834	6.70083e-21
PYGM	-0.0885829	0.0686709	0.00622055	0.035953	-0.0226102	-0.100492	0.0321621
PYM1	-0.0211246	0.100613	-0.0492471	-0.0289572	-0.0351928	-0.146343	5.52226e-22
QDPR	0.0171327	0.00193366	0.155569	-0.201711	0.0935899	-0.0362464	0.00113246
QKI	-0.0730459	0.0576235	-0.0304316	-0.00503445	0.0214262	-0.0856188	0.00157519
QRICH1	0.0353253	0.0798284	0.250858	0.110501	-0.0915218	-0.220282	4.07758e-12
QTRT1	-0.0138907	0.108683	-0.0627084	0.131936	0.0643117	-0.264391	1.10154e-15
RAB11A	0.03582	0.0354911	0.138967	-0.0580376	-0.0354603	-0.0815888	0.0013143
RAB13	-0.0354861	0.107937	0.0177777	-0.0292275	-0.0823706	-0.147677	1.06836e-31
RAB15	-0.0764999	0.0233446	-0.0336381	0.0109344	0.0179921	-0.0203259	5.764e-16
RAB1C	0.0743267	0.12002	-0.15499	-0.0401476	0.0767813	-0.247888	1.21556e-26
RAB21	-0.161148	0.0330924	-0.0562903	0.0735465	0.0431759	-0.0342135	7.93352e-05
RAB25	-0.0125303	0.138469	-0.0928462	0.0145409	-0.0462125	-0.219511	5.55713e-53
RAB29	-0.040254	0.0467655	0.0580216	-0.0229826	-0.00746762	-0.0792425	0.00605813
RAB32	-0.122004	0.0976791	0.0301039	0.0418776	-0.0526974	-0.136279	0.000200667
RAB39A	-0.0545461	0.000943932	0.267507	-0.110764	0.105538	-0.0713713	0.000205573
RAB3GAP2	-0.0266491	0.0925808	0.0277091	-0.0562684	-0.059365	-0.127423	2.54362e-50
RAB4A	-0.0841203	0.138482	-0.0287112	-0.0760656	-0.0951554	-0.154722	8.2921e-12
RAB6B	-0.0809505	0.0124012	0.211034	-0.0907988	0.128459	-0.0871726	0.00503874
RAB8B	-0.127496	0.0817695	0.0722999	-0.0264561	-0.0842438	-0.0761987	0.0168928
RABGAP1	0.0148222	0.0679263	-0.0889113	-0.0910309	0.0699584	-0.121979	1.15649e-10
RABGEF1	0.090355	0.0938107	-0.0713043	-0.0920751	-0.0818504	-0.12523	1.41037e-10
RAD50	-0.0269362	0.0613564	-0.0513433	-0.0502978	-0.0605554	-0.0474799	5.56882e-05
RAI14	-0.0632693	0.0654354	-0.0330407	-0.0683419	-0.0175789	-0.0632547	0.0182856
RAP2A	0.0991789	0.119297	-0.0901355	-0.0682117	-0.0941777	-0.174092	9.46343e-08
RAP2B	-0.0937233	0.0403891	0.247586	-0.0104136	-0.0730835	-0.0655363	0.00173791
RAP2C	-0.000887265	0.0696247	-0.061534	-0.0132015	-0.0315199	-0.0977132	3.46374e-10
RASA1	0.0493919	0.145404	-0.0361624	-0.0712537	-0.0209462	-0.257378	5.38916e-31
RBBP7	-0.0503577	0.15546	-0.0618189	0.0120125	-0.0698215	-0.232947	3.59213e-23
RBFA	-0.0319445	0.121538	0.093113	-0.017056	0.0867996	-0.287796	3.89663e-12
RBM10	0.141374	0.00687064	-0.0488761	0.119536	0.121148	-0.155685	3.5702e-11
RBM15	-0.132151	0.132048	0.0339398	-3.76e-05	-0.231246	-0.0928785	0.00844132
RBM17	-0.0480997	0.0573676	-0.0471708	-0.0358315	-0.0303819	-0.0532489	0.00672156
RBM39	-0.177766	0.0578969	-0.0510806	0.0762898	0.0393078	-0.0761412	0.0329627
RCC1	0.223626	-0.0064186	-0.0944811	0.00928597	0.00898099	-0.0554332	3.52144e-05
RCN2	-0.158403	0.118781	-0.149995	0.130094	0.0191869	-0.182038	2.1157e-14
RCN3	-0.023552	0.0481396	-0.0390014	-0.0330545	-0.0344085	-0.0455836	1.96486e-21
RCSD1	-0.063997	0.0747214	-0.0974995	-0.0520868	0.0714827	-0.116107	0.00190647
RDH13	0.154819	0.149567	-0.208129	0.098937	-0.0635747	-0.291991	1.46605e-17
RENBP	-0.0636064	0.0869614	-0.0547555	-0.00349699	-0.00251113	-0.127578	0.00419494
RGPD5	0.089882	0.112404	-0.166776	-0.129219	-0.0136532	-0.160261	7.33903e-07
RGPD8	0.089882	0.112404	-0.166776	-0.129219	-0.0136532	-0.160261	7.33903e-07
RIN1	-0.0466763	0.0834653	0.077957	-0.0525373	0.012479	-0.154225	1.43291e-06
RINT1	-0.0925294	0.19964	-0.0931058	0.0685855	0.0763347	-0.389072	8.6678e-64
RMC1	-0.0501017	0.0795711	0.0911123	-0.104339	-0.0902324	-0.0784405	0.0100999
RMDN1	-0.0930528	0.122473	-0.0319511	0.0331695	-0.0561951	-0.174504	0.000236418
RMDN3	-0.0520282	0.0870343	0.0581352	-0.0648138	0.0194799	-0.153734	6.50682e-05
RNASEL	0.0188368	0.0886723	-0.00375902	-0.0402794	-0.0186063	-0.155386	0.000830589
RNF40	0.195166	-0.0132665	0.250579	-0.120307	-0.117217	-0.0140681	0.00690212
RNPEP	0.232276	-0.0732374	0.14651	0.112059	0.0756527	-0.0597168	0.000668551
RO60	-0.0930263	0.0974264	-0.046369	-0.11262	0.0264779	-0.119605	0.0026597
ROCK1	-0.0953881	0.125656	-0.0671551	0.17831	0.031233	-0.262454	5.34853e-60
RPL11	-0.0333359	0.0481303	-0.0424521	-0.0463218	-0.0219222	-0.0433216	5.20606e-05
RPL12	-0.0244212	0.075537	-0.0384768	-0.0645795	0.0549384	-0.135453	0.0011521
RPL13	-0.0971086	0.182985	-0.0844338	0.0738814	-0.222212	-0.20207	1.46112e-13
RPL15	0.085083	0.0795342	0.140741	0.0665335	-0.241259	-0.117248	0.00215773
RPL18	0.159093	0.0445523	-0.0732223	-0.0863144	-0.0740245	-0.0613456	0.0479466
RPL26	-0.0749129	0.0714575	0.332766	-0.139577	0.140019	-0.226251	3.11668e-06
RPL26L1	-0.0418135	0.0746512	0.225574	-0.130769	0.0908248	-0.193957	3.16084e-06
RPL34	-0.0669616	0.0720789	0.17665	-0.0968465	0.0659917	-0.164342	3.5832e-09
RPL35	-0.0428924	0.0663946	-0.0442065	-0.0478015	-0.0523297	-0.0581586	0.0111347
RPL7A	-0.0582798	0.0404026	0.00103871	-0.0340176	0.0574113	-0.0758311	0.00316348
RPS12	-0.00406063	0.0550833	0.00763069	-0.0155481	0.0311321	-0.118582	2.11458e-07
RPS17	-0.0808525	0.0473841	0.0183173	-0.0645201	-0.000423925	-0.0452462	0.0215952
RPS26	-0.126355	0.0827802	0.220163	-0.0864916	0.0572801	-0.172577	7.05091e-05
RPS26P11	-0.116606	0.0766381	0.0439174	0.00557989	0.0668143	-0.152529	0.00409651
RPS27L	0.0393577	0.0647421	-0.0113113	-0.0736813	-0.0649148	-0.0799495	1.06346e-05
RPS28	0.0498276	0.0766176	-0.0815349	-0.103632	0.119656	-0.17616	6.13646e-08
RPS5	-0.0471958	0.0593708	-0.0509371	-0.0477431	-0.0437551	-0.0456923	0.000159144
RRAD	-0.0236013	0.061202	0.113169	-0.00408419	-0.000191655	-0.137708	1.75841e-13
RRAGB	-0.0983441	0.0257168	0.162605	0.0118129	0.00977772	-0.0637849	0.0154151
RRM1	-0.0480233	0.0382273	-0.0158387	0.00158603	0.118247	-0.114346	0.000422866
RRM2	-0.0546586	0.0805423	0.043446	0.0677848	-0.011983	-0.161719	0.00431968
RRM2B	-0.00477135	0.118562	-0.155564	-0.110102	-0.0549514	-0.123532	6.83974e-07
RRP1B	-0.0618598	0.0582687	-0.0258075	-0.0857179	0.0395011	-0.0763084	0.00494071
RRP9	-0.067006	0.0863203	-0.129338	0.0490263	0.131975	-0.192897	1.6921e-12
RSL1D1	0.0373157	0.0371445	-0.0330196	-0.135013	0.102683	-0.088773	3.56241e-09
RTCA	-0.0689842	0.0620177	0.0239109	-0.00624758	0.0084237	-0.102628	0.00433931
S100A10	-0.060305	0.0559008	-0.0370776	0.0237874	-0.00977182	-0.0780962	0.00534546
S100A13	-0.105758	0.0706419	0.138805	-0.126777	-0.0415366	-0.0709739	0.00338711
S100A14	-0.0817059	0.0659437	-0.00945686	-0.0128877	-0.00645896	-0.0867764	0.00920505
SAE1	0.0315932	0.150928	-0.153556	0.176483	-0.0790336	-0.278498	5.03443e-17
SAFB2	-0.0556961	0.0304504	0.0729492	-0.0796354	0.12371	-0.0967238	2.67154e-05
SAMD1	-0.0163684	0.106783	-0.0494844	0.0731289	0.261657	-0.348367	1.68734e-16
SAMD9	0.13576	0.130072	-0.217363	0.0165124	-0.0322126	-0.235015	3.40518e-23
SART1	-0.0913058	0.00969979	0.06006	0.0396823	0.0136914	-0.0195535	1.133e-09
SASH3	-0.079696	0.055693	0.0461559	-0.015893	0.0372735	-0.104233	0.000822257
SBNO1	-0.0436344	0.0646401	-0.0252801	-0.0351875	-0.0654585	-0.0565031	0.00483371
SCD	-0.118412	0.0824771	0.112046	-0.130609	0.126208	-0.169083	0.0125339
SCRIB	-0.0261235	0.103802	-0.151901	-0.208628	-0.00815377	-0.0812441	0.00287557
SDC1	-0.00565173	0.0419512	-0.0133446	-0.0257535	0.0227066	-0.0794168	6.6143e-37
SDF2	-0.00945311	0.0730887	0.00876684	-0.0291809	-0.0153982	-0.122933	0.0466576
SDF2L1	0.0462967	0.0402666	0.0133735	-0.182994	0.135225	-0.112265	0.00760984
SDF4	0.0668098	0.0817893	0.0256751	-0.00366348	-0.0757967	-0.149451	4.39723e-06
SEC14L2	-0.059397	0.069478	-0.0552778	-0.0582296	-0.0454359	-0.0553061	0.00414548
SEC14L3	-0.0406794	0.0496604	-0.0366899	-0.0396786	-0.0355575	-0.0399343	0.00422163
SEC23IP	-0.00873232	0.038148	0.183549	-0.0888858	-0.0757267	-0.0505374	2.2132e-10
SEC61B	-0.0787716	0.15401	0.0186385	-0.0259619	-0.0569136	-0.235125	1.89088e-17
SEC62	-0.082774	0.257709	-0.085347	0.00846112	0.074204	-0.487132	5.36336e-53
SEMG2	-0.0636237	0.041639	-0.0290099	-0.0582173	-0.00774636	-0.0264542	0.029598
SERPINA2	-0.0393223	0.0399111	-0.0434994	-0.0546159	0.0625173	-0.0666248	1.50135e-33
SERPINB9	0.341621	-0.0883531	0.189888	0.131804	0.017801	-0.0590794	0.00168696
SERPINI2	0.00674696	0.0235459	0.291189	-0.00592892	-0.00241482	-0.120981	2.05134e-19
SESTD1	-0.126638	0.0573129	0.30165	0.112579	0.0176967	-0.186541	7.25116e-20
SET	-0.0519086	0.0508285	0.0251121	-0.0439124	-0.0277163	-0.0568414	8.75699e-09
SFTPA1	-0.0420665	0.0311522	0.0952316	-0.0988413	0.100143	-0.0906056	0.0210603
SFTPA2	-0.0420665	0.0311522	0.0952316	-0.0988413	0.100143	-0.0906056	0.0210603
SGSH	0.0098579	0.0604887	-0.0421787	-0.0232368	-0.00451569	-0.100168	8.45734e-10
SH3BGRL2	0.0328841	0.109846	-0.102033	-0.0953346	-0.0357541	-0.149665	1.08221e-17
SH3BGRL3	0.073238	0.0102779	-0.208132	0.0222414	0.0526169	-0.0280935	1.28471e-18
SI	-0.0632955	0.0817774	-0.0544535	-0.0577327	-0.0629105	-0.0688337	0.0165157
SIAE	-0.198581	0.0531967	0.256921	-0.176794	-0.0526174	-0.0111371	0.0131532
SIGLEC5	-0.0722791	0.0295949	0.00583004	0.106215	0.0797976	-0.106948	0.00847582
SIRT2	-0.183959	0.223277	-0.212658	0.08436	0.197985	-0.43791	1.15929e-46
SLC25A1	-0.0761093	0.0418148	-0.0765369	0.0601456	0.140117	-0.124816	1.79939e-05
SLC25A11	-0.00980912	0.10861	-0.0598463	-0.0554441	0.0324094	-0.190522	1.97614e-61
SLC25A31	-0.0714731	0.0931459	0.0890386	-0.0350964	-0.0377381	-0.145572	4.1985e-14
SLC39A7	0.0742237	0.0668329	-0.0102242	-0.05077	0.07151	-0.176474	8.26216e-07
SLC44A1	-0.0467052	0.0877491	0.0318928	0.0024811	0.00372986	-0.163292	1.50822e-07
SLC44A4	-0.108251	0.0810374	-0.00555375	-0.106855	-0.00597315	-0.0774974	9.64989e-05
SLC4A2	-0.0409663	0.146132	-0.080728	-0.0933316	0.136963	-0.288907	6.97066e-14
SLC5A2	-0.0553555	0.0654094	-0.037297	0.105211	-0.00234342	-0.127984	0.00566481
SLC9A6	-0.0550787	0.226783	-0.0951394	0.077004	0.226943	-0.537157	1.42962e-26
SLFN5	0.00288091	-0.0378802	0.245827	-0.189813	0.103222	0.0138999	2.31459e-08
SLK	0.0915141	0.0548998	-0.0626495	-0.0786548	0.0692954	-0.136266	2.07349e-06
SLMAP	0.00414683	0.0609317	0.153982	0.0129213	0.000331391	-0.164013	0.000181109
SMARCA5	-0.115964	0.0360657	0.0793202	-0.0858592	0.0244526	-0.0322461	0.00396062
SMARCAD1	-0.0682416	0.071413	0.052574	0.164651	-0.0233358	-0.165927	0.00557442
SMARCC2	0.0384486	0.0250569	-0.022206	0.0228624	0.0805999	-0.106925	0.000614033
SMARCE1	-0.0215401	0.168337	-0.0243795	-0.153874	-0.0423919	-0.240554	4.45853e-19
SMC4	0.0598392	0.0708938	0.144313	-0.144659	-0.14118	-0.0776975	0.00263706
SMPD4	-0.0225379	0.0862513	-0.0844481	-0.00580437	0.0654037	-0.169013	0.0040618
SMPDL3B	-0.0856944	0.13927	0.218077	-0.0454474	-0.0509223	-0.252965	9.24464e-55
SMU1	-0.107372	0.104963	-0.0652357	0.0212651	0.00662069	-0.155734	5.69914e-08
SNAPIN	-0.0667802	0.0524376	0.190403	0.134894	0.000894281	-0.169014	1.1413e-13
SNED1	-0.0538685	-0.00239568	0.133629	0.088534	0.160157	-0.121968	0.00987232
SNRPA	-0.135445	0.105834	0.0997494	0.134226	-0.0218289	-0.21057	1.68167e-09
SNRPC	-0.0302776	0.0460794	-0.0306647	-0.0310798	-0.0296468	-0.0443437	0.00680328
SNRPG	-0.160859	0.0673821	-0.085884	-0.0982002	0.0481447	-0.0413188	3.98511e-07
SNRPGP15	-0.153286	0.0678991	-0.0933236	-0.100219	0.0489444	-0.043035	8.45698e-07
SON	-0.0638047	0.0252574	0.0691542	-0.150309	0.117778	-0.0571336	7.27332e-07
SPAG9	-0.0253127	0.129298	-0.162699	0.0746592	-0.0798463	-0.180003	4.68954e-07
SPART	-0.087783	0.0910161	-0.0213039	-0.0993984	-0.0375546	-0.0862372	0.0192397
SPATS2L	-0.0173881	0.0512831	-0.0775776	-0.0806914	0.04596	-0.0711332	0.0149585
SPECC1L	-0.0650894	0.0642018	0.0066107	-0.110977	-0.0211717	-0.0551488	0.0106164
SPEN	-0.0180918	0.110239	0.160767	-0.12354	-0.141443	-0.135161	6.16082e-11
SPG21	0.0318761	0.178875	-0.182919	-0.0723201	-0.128825	-0.220225	6.27933e-26
SPG7	-0.0932906	0.0861802	0.19854	-0.0654072	0.0593506	-0.193823	2.82917e-05
SPINT1	0.00369364	0.049589	0.075111	-0.114996	0.106646	-0.136738	0.00595055
SPTBN2	-0.114209	0.0223854	0.0738098	0.0211289	0.067503	-0.0614406	0.00159566
SRA1	0.105587	0.149858	-0.115469	0.209187	0.0183375	-0.375967	2.36275e-20
SRCIN1	-0.0324133	0.0708794	-0.0150059	-0.0465501	-0.018917	-0.0963988	1.13486e-14
SRM	-0.022405	0.0946248	0.0840056	0.124326	-0.0951441	-0.185975	0.00064593
SRP19	-0.100348	0.0877914	-0.0948901	-0.0713775	-0.00285268	-0.0831306	0.00262339
SRPRA	-0.0951779	0.0722936	0.319316	-0.167893	0.0783133	-0.17528	1.36576e-11
SRR	-0.0663868	0.0564891	-0.0620348	-0.0115769	0.0668462	-0.0995123	0.00576512
SRRM1	0.050741	0.0806634	-0.0828333	-0.141895	0.0190726	-0.119029	0.0199717
SRSF11	-0.0745697	0.0564493	-0.0748788	0.0557824	0.0102103	-0.0845061	2.80378e-05
SRSF2	-0.054372	-0.031207	0.114676	0.0688768	0.122743	-0.0351482	0.001097
SRSF5	0.0966469	0.0492957	0.147386	0.101162	0.0136295	-0.209747	7.51176e-05
SRSF8	-0.0628741	0.0521428	-0.0312662	-0.0344927	0.0120482	-0.0644012	0.000134489
[truncated: 1,327 more rows]

## Sheet: CCP_Cluster
Gene_Symbol	CCP_Cluster
A1BG	1
ABCF2	1
ABI3BP	1
ABLIM1	1
ACACA	1
ACACB	1
ACP1	1
ACTA1	1
ACTA2	1
ACTB	1
ACTBL2	1
ACTC1	1
ACTG1	1
ACTG2	1
ACTR2	1
AGT	1
AKR1C1	1
ALAD	1
ALG14	1
AMBP	1
ANK1	1
ANXA6	1
AP2M1	1
APCS	1
APOF	1
AQR	1
ARHGAP4	1
ARL2	1
ATF6	1
AZU1	1
B4GALT5	1
BCAM	1
BCS1L	1
BLOC1S4	1
C1R	1
C1S	1
C2	1
C3	1
C4A	1
C4B	1
C4BPA	1
C4BPB	1
C5	1
C6	1
C7	1
C8A	1
C8B	1
C8G	1
C9	1
CALR	1
CAPZB	1
CD14	1
CDC5L	1
CFB	1
CFH	1
CFHR1	1
CFHR3	1
CFHR5	1
CFI	1
CHI3L1	1
CLIC1	1
CP	1
CPN1	1
CPN2	1
CRP	1
DIRAS2	1
DNM2	1
DPP4	1
DSC3	1
DTNA	1
EIF2B2	1
EIF2D	1
ELAVL1	1
ENO1	1
F9	1
FAM20C	1
FBN1	1
FBN2	1
FERMT3	1
FGA	1
FGB	1
FGG	1
FGL1	1
FKBP9	1
FLNA	1
FXR1	1
GALNT7	1
GAS6	1
GATAD2B	1
GOLGA3	1
GSTA4	1
GSTM2	1
GSTO1	1
HCFC1	1
HNF4A	1
HP	1
HP1BP3	1
HPR	1
HPX	1
HSPB1	1
ICAM1	1
INIP	1
INTS14	1
ITGB3	1
ITIH3	1
ITIH4	1
KRT15	1
KRT6A	1
KRT6C	1
KRT75	1
KRT84	1
LACTB	1
LAMB3	1
LBP	1
LGALS3BP	1
LMAN2	1
LNPK	1
LONP2	1
LRG1	1
LRP1	1
LSAMP	1
MAN1A1	1
MASP2	1
MFGE8	1
MMP10	1
MMP8	1
MPC2	1
MRC1	1
NCF1	1
NCF1B	1
NCF1C	1
NDUFA12	1
NDUFAF3	1
NDUFB4	1
NID1	1
NME2	1
OAF	1
OIT3	1
OLFM1	1
ORM1	1
ORM2	1
P3H1	1
PCBP2	1
PCK1	1
PDHB	1
PGM2	1
PKM	1
PLEKHM1	1
POTEE	1
POTEF	1
POTEI	1
POTEJ	1
POTEKP	1
PPOX	1
PRB3	1
PRG4	1
PROS1	1
PSIP1	1
PSMB10	1
PVR	1
PYCR2	1
RAB1B	1
RABEP2	1
RBBP4	1
RBCK1	1
RCC1L	1
RCN1	1
RNASEH2C	1
RPAP3	1
RPIA	1
RPL27	1
RPS15	1
RTN4	1
RWDD4	1
SAA1	1
SAA2	1
SCG3	1
SEC22B	1
SERPINA1	1
SERPINA10	1
SERPINA3	1
SERPINA6	1
SERPIND1	1
SERPINF2	1
SERPING1	1
SH3KBP1	1
SLC2A3	1
SMARCA2	1
STRAP	1
STX8	1
SYTL2	1
TAOK3	1
TCN1	1
TH	1
THBS1	1
THOP1	1
THY1	1
TKT	1
TMSB4X	1
TTC7B	1
TUBA1A	1
TUBA1B	1
TUBA1C	1
TUBA4A	1
TUBA4B	1
TUBA8	1
UTRN	1
VCL	1
VPS25	1
VPS4A	1
VSIG4	1
VTN	1
VWF	1
WDR1	1
WDR12	1
XPO7	1
YTHDC2	1
ZYX	1
A1CF	2
AARS2	2
AARSD1	2
ABCD1	2
ABHD10	2
ABHD11	2
ABHD12	2
ACADM	2
ACADVL	2
ACAT1	2
ACSL1	2
ACSL3	2
ADGRB3	2
ADGRL1	2
ADIPOQ	2
ADPRS	2
ADSS2	2
AGFG1	2
AGMAT	2
AGO3	2
AGTRAP	2
AIP	2
AK4	2
AK5	2
AKAP12	2
AKR1C2	2
AKR1C3	2
ALCAM	2
ALDH5A1	2
ALDH7A1	2
ALG2	2
AMDHD2	2
ANGPTL3	2
ANGPTL6	2
ANP32D	2
ANXA4	2
AOC1	2
AOX1	2
AP1B1	2
APLP1	2
APOB	2
APOC4	2
APOL2	2
APOOL	2
ARG1	2
ARHGAP17	2
ARHGAP35	2
ARHGEF10L	2
ARHGEF12	2
ARHGEF6	2
ARPC1B	2
ART4	2
ASL	2
ATAD1	2
ATP1B3	2
ATP2A1	2
ATP2B1	2
ATP2B2	2
ATP2B4	2
ATP4A	2
ATP5F1A	2
ATP5F1B	2
ATP5MF	2
ATP5MPL	2
ATP5PB	2
ATP6V0A1	2
ATP6V1E1	2
ATRX	2
B3GALT6	2
B4GALT1	2
B4GAT1	2
BAG2	2
BCAR1	2
BCAT2	2
BHMT	2
BHMT2	2
BLM	2
BPIFB1	2
BUB3	2
BUD31	2
C16orf58	2
C1QB	2
C2CD2	2
CADM1	2
CADM4	2
CALCOCO2	2
CALU	2
CAND1	2
CARMIL1	2
CBR3	2
CBR4	2
CBX3	2
CCDC124	2
CCDC6	2
CCNK	2
CCNT1	2
CCT2	2
CCT6A	2
CCT6B	2
CD109	2
CD163	2
CD2AP	2
CD44	2
CD58	2
CD63	2
CD9	2
CDC23	2
CDC73	2
CDH5	2
CDK6	2
CFAP410	2
CGNL1	2
CHDH	2
CHGB	2
CHMP2A	2
CHST3	2
CIAO1	2
CILP	2
CILP2	2
CKAP5	2
CLIP2	2
CLNS1A	2
CLPTM1L	2
CLPX	2
CLSTN1	2
CLTCL1	2
CLUH	2
CMBL	2
CNDP1	2
CNOT1	2
CNTFR	2
COG2	2
COL12A1	2
COL1A2	2
COL3A1	2
COL6A1	2
COL6A6	2
COLEC11	2
COMP	2
COPB1	2
COPG1	2
COPG2	2
COPS2	2
COQ3	2
CORO1B	2
CPA2	2
CPA3	2
CPS1	2
CRAT	2
CRISP3	2
CRKL	2
CSRP1	2
CST6	2
CSTA	2
CSTF1	2
CTBS	2
CTNNA2	2
CTNNBIP1	2
CTNNBL1	2
CTNND2	2
CTPS1	2
CUL2	2
CUL4B	2
CUX1	2
CXXC1	2
CXorf38	2
CYB5A	2
CYB5R1	2
CYB5R2	2
CYFIP1	2
DBH	2
DCAF7	2
DCAKD	2
DCPS	2
DDA1	2
DDX17	2
DDX41	2
DDX46	2
DDX52	2
DDX58	2
DENND10	2
DENND10P1	2
DGLUCY	2
DLAT	2
DLG1	2
DMGDH	2
DNAJA1	2
DNAJB11	2
DNAJB12	2
DNAJC10	2
DNAJC3	2
DNTTIP2	2
DOCK6	2
DOCK8	2
DOP1B	2
DPYSL3	2
DSG1	2
DSTN	2
DTX3L	2
DYNC1LI1	2
ECH1	2
ECI2	2
EEF1A1	2
EEF1A1P5	2
EEF1A2	2
EEF2	2
EFEMP1	2
EFHD1	2
EHD1	2
EIF3A	2
EIF3F	2
EIF3L	2
EIF5	2
EIF5A	2
ELMOD2	2
ELOVL7	2
EMC1	2
EMC2	2
ENPP6	2
ENPP7	2
EPS8	2
ERLEC1	2
ESD	2
ETFDH	2
ETHE1	2
EWSR1	2
EXOC1	2
F11	2
FABP3	2
FAM83H	2
FAM98A	2
FASN	2
FBLN1	2
FBLN5	2
FBP1	2
FBP2	2
FBXL18	2
FBXO6	2
FBXO7	2
FCN2	2
FCSK	2
FES	2
FMNL2	2
FN1	2
FOXK1	2
FREM2	2
FSCN1	2
FXR2	2
GALE	2
GALM	2
GAP43	2
GBP1	2
GCNT3	2
GGCT	2
GGT2	2
GGT5	2
GIMAP4	2
GIPC2	2
GIT2	2
GLG1	2
GLOD4	2
GLUD1	2
GMFB	2
GMFG	2
GNAZ	2
GNPTG	2
GOLGA4	2
GOLGA5	2
GOLM1	2
GOSR2	2
GPS1	2
GPT	2
GPX1	2
GPX2	2
GRK2	2
GRN	2
GSPT2	2
GSTA5	2
GSTM4	2
GTF2B	2
GUCA2A	2
GUCY1B1	2
H1-3	2
HARS1	2
HCLS1	2
HDAC6	2
HDGFL2	2
HECTD3	2
HERC6	2
HEXA	2
HK1	2
HK2	2
HLA-C	2
HLA-DRB1	2
HMGB1	2
HMGB3	2
HMGCS2	2
HMOX2	2
HNRNPD	2
HNRNPH1	2
HNRNPH2	2
HOOK1	2
HOOK3	2
HPN	2
HSD17B8	2
HSP90AA1	2
HSPA13	2
HSPA1A	2
HSPA1B	2
HSPA4	2
HSPH1	2
IARS1	2
ICAM3	2
IDE	2
IFI30	2
IGF2R	2
IGFBP1	2
IGFBP6	2
IGHM	2
IGHV3-11	2
IGHV3-13	2
IGHV3-20	2
IGHV3-21	2
IGHV3-43	2
IGHV3-43D	2
IGHV3-48	2
IGHV3-74	2
IGHV3-9	2
IGHV4-39	2
IGKV2-29	2
IGKV2D-26	2
IGKV2D-29	2
IGKV2D-30	2
IGKV3-7	2
IGKV6D-21	2
IGKV6D-41	2
IGLV1-40	2
IMPA1	2
INA	2
INHBC	2
INTS1	2
ISCA2	2
ISOC1	2
ITGA7	2
ITGAL	2
ITGAV	2
ITPR1	2
ITPR2	2
IVD	2
JCHAIN	2
KHDRBS1	2
KHDRBS2	2
KIF1A	2
KIF1B	2
KIF2A	2
KIF5C	2
KRT13	2
KRT14	2
KRT3	2
KRT6B	2
KRT7	2
KRT73	2
KRT76	2
KRT79	2
L3HYPDH	2
LAMA5	2
LANCL1	2
LAS1L	2
LCN1P1	2
LGALS7	2
LGALS9	2
LMAN1	2
LMNB2	2
LPA	2
LPCAT3	2
LRRC40	2
LRRC47	2
LTBP2	2
LZIC	2
M6PR	2
MACO1	2
MADCAM1	2
MAN2C1	2
MAP2K1	2
MAP2K2	2
MAP2K3	2
MAPK4	2
MAPK6	2
MARCHF5	2
MAST1	2
MAST4	2
MCCC1	2
MCCC2	2
MDH2	2
ME2	2
MEAK7	2
MED30	2
METAP1	2
MFAP4	2
MGP	2
MICAL1	2
MMP19	2
MMP9	2
MORF4L2	2
MPI	2
MPO	2
MPP1	2
MPP3	2
MPRIP	2
MRGPRF	2
MROH1	2
MRPL50	2
MRPS9	2
MSH3	2
MSI2	2
MST1L	2
MTA2	2
MX1	2
MYCBP2	2
MYH1	2
MYH14	2
MYH2	2
MYH3	2
MYH4	2
MYH6	2
MYH7	2
MYH7B	2
MYH8	2
MYO1E	2
MYO5B	2
MZB1	2
NAA15	2
NAGLU	2
NAPB	2
NAXE	2
NBL1	2
NCAM2	2
NCKAP1L	2
NDUFA13	2
NDUFA4	2
NDUFA9	2
NEBL	2
NECTIN3	2
NEDD4L	2
NEFL	2
NEK7	2
NELFA	2
NENF	2
NFATC2	2
NHLRC2	2
NIBAN1	2
NIPSNAP2	2
NIPSNAP3A	2
NLN	2
NME3	2
NOP58	2
NOS1	2
NRDC	2
NRP1	2
NRP2	2
NSDHL	2
NSUN2	2
NT5C	2
NT5E	2
NUDT5	2
NUMBL	2
NUP133	2
NUP205	2
NUP85	2
NUP98	2
OLFM4	2
OLFML3	2
OMD	2
OSMR	2
OSTF1	2
OXSR1	2
P2RX4	2
PACS2	2
PACSIN2	2
PADI4	2
PAF1	2
PAPSS2	2
PARP1	2
PBDC1	2
PBLD	2
PCOLCE	2
PDAP1	2
PDCD10	2
PDE12	2
PDIA3	2
PDIA4	2
PDIA6	2
PDK1	2
PDK2	2
PDK4	2
PDLIM3	2
PDPR	2
PDS5A	2
PFDN4	2
PFN2	2
PGPEP1	2
PHIP	2
PIGR	2
PIGS	2
PITPNM2	2
PKP1	2
PKP2	2
PLBD2	2
PLD3	2
PLOD1	2
PLP2	2
PLXNA1	2
PMPCA	2
PMPCB	2
PNKP	2
PNP	2
PNPO	2
PODXL	2
POLR2H	2
PON3	2
POSTN	2
PPA1	2
PPIB	2
PPP2R1A	2
PPP4R1	2
PPP4R3A	2
PPP6R1	2
PRELP	2
PRKCA	2
PRMT1	2
PRMT5	2
PROZ	2
PRPF19	2
PRSS29P	2
PRTN3	2
PRUNE1	2
PSAP	2
PSEN1	2
PSMA8	2
PSMB1	2
PSMB7	2
PSMC2	2
PSMC6	2
PSMD11	2
PSMD2	2
PSMD5	2
PSMD9	2
PSME1	2
PTGDS	2
PTK2	2
PWP2	2
QSOX1	2
RAB14	2
RAB18	2
RAB27A	2
RAB3GAP1	2
RAB4B	2
RAB7A	2
RAB8A	2
RABGGTB	2
RAC1	2
RAC2	2
RAC3	2
RACK1	2
RALGAPB	2
RALY	2
RAP1A	2
RAP1B	2
RBM12	2
RBM14	2
RBM3	2
RBM8A	2
RBP1	2
RCOR2	2
REXO2	2
RGPD1	2
RGPD2	2
RIDA	2
RIOX2	2
RNF13	2
RPL10A	2
RPL17	2
RPL18A	2
RPL22	2
RPL24	2
RPL30	2
RPL36	2
RPS10	2
RPS10P5	2
RPS15A	2
RPS23	2
RPS24	2
RTCB	2
RTN4RL2	2
RUFY1	2
S100A6	2
S100B	2
SAMHD1	2
SAMM50	2
SAR1B	2
SARM1	2
SARS2	2
SART3	2
SBF1	2
SBSN	2
SCG2	2
SCGB1A1	2
SCO1	2
SCPEP1	2
SCYL1	2
SDC4	2
SDHA	2
SDHB	2
SECTM1	2
SEH1L	2
SEL1L	2
SEPHS2	2
SEPTIN11	2
SERPINA11	2
SERPINB12	2
SETSIP	2
SEZ6L2	2
SF1	2
SF3B2	2
SFXN3	2
SIN3A	2
SIRPA	2
SIRPB1	2
SLC1A2	2
SLC25A13	2
SLC25A4	2
SLC27A3	2
SLC39A14	2
SLC9A3R1	2
SLIRP	2
SMARCA1	2
SMARCA4	2
SMC3	2
SNAP25	2
SNAP29	2
SNX2	2
SNX9	2
SP100	2
SQSTM1	2
SRL	2
SRRT	2
SRSF4	2
SRSF7	2
SRSF9	2
SSR1	2
STAT5B	2
STIM1	2
STRBP	2
STX1A	2
STX7	2
STXBP5	2
SULT1B1	2
SWAP70	2
SYK	2
SYNPO2	2
TANGO2	2
TARS3	2
TBCA	2
TBCB	2
TBK1	2
TBXAS1	2
TCIRG1	2
TELO2	2
TGFB1I1	2
THBS2	2
THBS3	2
THBS4	2
THOC5	2
THOC6	2
THRAP3	2
TIMM10	2
TIMM44	2
TINAGL1	2
TJP1	2
TK2	2
TM9SF2	2
TMCC3	2
TMED7	2
TMED9	2
TMEM214	2
TMEM256	2
TMOD2	2
TMPRSS13	2
TMPRSS6	2
TNC	2
TNFRSF21	2
TNPO3	2
TOM1	2
TOR1AIP1	2
TP53RK	2
TPT1	2
TRIM21	2
TRIM47	2
TRMT5	2
TSC2	2
TSN	2
TUBB1	2
TUBB3	2
TUBB8	2
UBA1	2
UBE2L5	2
UBE2N	2
UBE2NL	2
UBE2O	2
UBE3C	2
UBQLN1	2
UCHL3	2
UFL1	2
UHRF1	2
UNC50	2
UNC93B1	2
UPF1	2
UQCRQ	2
USP14	2
USP39	2
USP48	2
USP9X	2
VAC14	2
VAV1	2
VIL1	2
VNN1	2
VPS18	2
VPS29	2
VPS36	2
VPS37B	2
VTI1B	2
WASH4P	2
WDR75	2
XPNPEP2	2
YAP1	2
YARS1	2
YBX1	2
YBX3	2
ZC3HAV1	2
A2M	3
ACAD8	3
ACY1	3
ADAMDEC1	3
AEBP1	3
AGPAT1	3
AMPD3	3
ANP32C	3
ANXA1	3
ANXA3	3
ANXA5	3
APRT	3
ARF6	3
ARFGEF2	3
ARHGDIB	3
ATG4B	3
ATP6V1B1	3
BPTF	3
CAMKK2	3
CAPZA1	3
CDK14	3
CENPV	3
CFL1	3
CFL2	3
CLC	3
CNPY3	3
COMMD5	3
COPS3	3
CRHBP	3
CROCC	3
CSF1R	3
CSNK2A1	3
CSNK2A3	3
CTSD	3
CTSZ	3
CYFIP2	3
DCTN2	3
DDAH1	3
DDT	3
DDX23	3
DDX6	3
DIDO1	3
DLGAP4	3
DNAJA2	3
DPEP2	3
DRG2	3
DTD1	3
EEF1AKNMT	3
EFNB1	3
EIF4G2	3
ELP3	3
ENO2	3
ENO3	3
ERMP1	3
EXOC2	3
EXOC7	3
FAH	3
FHOD1	3
FLG	3
FUS	3
GAPDH	3
GLRX	3
GP1BA	3
GP5	3
GPNMB	3
GPX3	3
GSR	3
GSTP1	3
GUK1	3
GYG1	3
H2AC1	3
H4C1	3
HAGH	3
HECTD1	3
HMGB1P1	3
HNRNPA1L2	3
HNRNPA2B1	3
HSBP1	3
HSPA1L	3
HSPA2	3
HSPA5	3
HSPA6	3
HSPA7	3
HSPB7	3
IDH1	3
IGHV7-4-1	3
IGKV2-30	3
IGKV3-20	3
ILK	3
INPP1	3
ITCH	3
KANK2	3
KDM6A	3
KLK6	3
KPNA1	3
KRT72	3
LASP1	3
LCP1	3
LMF2	3
LTF	3
MALT1	3
MATN2	3
MCTS1	3
MGAM	3
MIF	3
MMP1	3
MRPL21	3
MTPN	3
MYH11	3
MYL6	3
NAA11	3
NAMPT	3
NAXD	3
NBAS	3
NFKB2	3
NTAN1	3
OGDHL	3
PABPC1L	3
PAICS	3
PCCB	3
PDCD4	3
PDE1B	3
PFDN2	3
PFN1	3
PGAM4	3
PGD	3
PGK2	3
PHC2	3
PIK3C3	3
PLEK	3
PLS3	3
PPBP	3
PRH1	3
PRPF4	3
PRPSAP2	3
PSMA1	3
PSMD13	3
PSMD6	3
PTER	3
PTMA	3
PZP	3
RAB10	3
RABGGTA	3
RARRES2	3
REEP3	3
RETSAT	3
RHOC	3
RNF123	3
RNF2	3
RNH1	3
RPLP0P6	3
RPS27A	3
RPS3	3
RRAS2	3
RSU1	3
RTRAF	3
S100A11	3
S100A12	3
S100A8	3
S100A9	3
S100P	3
SELP	3
SERPINB1	3
SERPINH1	3
SGTA	3
SH3BGRL	3
SIGLEC14	3
SKIV2L	3
SLC38A10	3
SOD2	3
SPG11	3
STK3	3
SUPT16H	3
SYNM	3
TBC1D15	3
TCAF1	3
TCEA2	3
TG	3
TMSB10	3
TOP1	3
TTC5	3
TUT1	3
TXLNA	3
TXN	3
TXNDC5	3
U2SURP	3
UBA52	3
UBAC2	3
UBB	3
UBC	3
UCHL1	3
USP5	3
UTY	3
UVRAG	3
VAMP8	3
VDAC2	3
VRK1	3
WDR3	3
XPO1	3
YWHAQ	3
ZFYVE19	3
AAAS	4
AACS	4
AADAC	4
AAK1	4
AAR2	4
ABCF3	4
ABI1	4
ACAA1	4
ACAD10	4
ACBD3	4
ACOT8	4
ACOT9	4
ACOX2	4
ACOX3	4
ACP2	4
ACP3	4
ACSL4	4
ACSL5	4
ACSM5	4
ACTR6	4
ADAM10	4
ADD1	4
ADH4	4
ADRM1	4
AFAP1L2	4
AGPAT3	4
AHCYL2	4
AHR	4
AIDA	4
AIG1	4
AIMP1	4
AKR1B1	4
AKR7A2	4
AKT1	4
AKT2	4
ALDH1L1	4
ALDH1L2	4
ALOX5AP	4
AMACR	4
ANKS1A	4
ANP32B	4
ANTXR2	4
APAF1	4
API5	4
APOBR	4
APOO	4
ARAP1	4
ARF5	4
ARFGAP1	4
ARFGAP2	4
ARFGEF1	4
ARFIP1	4
ARHGAP45	4
ARHGAP5	4
ARHGEF10	4
ARHGEF17	4
ARHGEF7	4
ARL1	4
ARL8B	4
ARVCF	4
ASCC2	4
ASNS	4
ASPN	4
ATAT1	4
ATG9A	4
ATP2A2	4
ATP2A3	4
ATP6AP2	4
ATP6V1C1	4
ATP6V1G1	4
ATP6V1H	4
ATP9A	4
ATPAF2	4
B3GNT8	4
BAALC	4
BAG6	4
BCAP31	4
BCAS2	4
BCKDHA	4
BCKDHB	4
BCL2	4
BCL2L13	4
BCR	4
BDH1	4
BDH2	4
BGN	4
BID	4
BIRC6	4
BMP1	4
BRK1	4
BSG	4
BTF3	4
BTF3L4	4
BYSL	4
BZW1	4
C11orf58	4
C17orf49	4
C17orf75	4
C1RL	4
C1orf52	4
C3orf38	4
C4orf33	4
C7orf50	4
C9orf64	4
CA9	4
CAB39	4
CAB39L	4
CACNA2D2	4
CADM3	4
CALML4	4
CAMSAP3	4
CAP2	4
CAPRIN1	4
CASP4	4
CASP5	4
CBL	4
CCAR1	4
CCDC47	4
CCDC90B	4
CCL18	4
CD84	4
CDC42BPA	4
CDH11	4
CDH16	4
CDIPT	4
CDK1	4
CDS2	4
CELA3B	4
CEMIP2	4
CEP170	4
CEP63	4
CGGBP1	4
CGN	4
CHCHD3	4
CHD3	4
CHML	4
CIAO2A	4
CLASP1	4
CLDN3	4
CLIC4	4
CLN5	4
CLPB	4
CLTA	4
CNOT11	4
CNTN2	4
CNTNAP1	4
COA7	4
COASY	4
COG6	4
COL2A1	4
COL5A1	4
COL5A3	4
COL6A5	4
COL8A1	4
COLGALT1	4
COMMD1	4
COMMD4	4
COPS7B	4
COPS8	4
CORO7	4
COX2	4
COX5B	4
CPNE8	4
CPNE9	4
CPSF2	4
CPVL	4
CR1L	4
CRADD	4
CRELD1	4
CRTAC1	4
CRTAP	4
CSE1L	4
CSF1	4
CSF2RA	4
CSNK1A1L	4
CSRP2	4
CSTB	4
CSTF3	4
CTPS2	4
CTRB1	4
CTRB2	4
CTSA	4
CTSS	4
CUL1	4
CUL5	4
CWF19L1	4
CYB5B	4
CYBC1	4
CYP20A1	4
CYP27A1	4
CYP2S1	4
CYP51A1	4
DAP3	4
DARS2	4
DBT	4
DCXR	4
DDC	4
DDRGK1	4
DDX3X	4
DDX47	4
DDX54	4
DECR2	4
DEGS1	4
DEK	4
DEPTOR	4
DFFA	4
DHCR7	4
DHODH	4
DHRS7	4
DHX15	4
DHX16	4
DHX30	4
DIABLO	4
DIAPH2	4
DICER1	4
DIP2B	4
DIS3	4
DLG3	4
DLG4	4
DNAAF5	4
DNAJA3	4
DNAJB1	4
DNAJB4	4
DNMT1	4
DPM1	4
DPY19L3	4
DSC1	4
DSG2	4
DSG3	4
DTNB	4
DUOX1	4
DUOX2	4
DYNC1LI2	4
EBI3	4
ECHDC1	4
EDC3	4
EDF1	4
EEA1	4
EEF1D	4
EFEMP2	4
EFL1	4
EIF1	4
EIF1B	4
EIF2A	4
EIF2B1	4
EIF2B4	4
EIF2S2	4
EIF2S3	4
EIF2S3B	4
EIF3D	4
EIF3E	4
EIF3G	4
EIF3J	4
EIF3M	4
EIF4E2	4
EIF4ENIF1	4
EIF4G1	4
EIF4H	4
ELAC2	4
ELMO1	4
ELOB	4
ELP1	4
EMG1	4
EMILIN2	4
ENG	4
EP400	4
EPB41	4
EPHA4	4
ERMN	4
ESRP1	4
ESYT1	4
EVL	4
EXD2	4
EXOC6B	4
EXT1	4
FAAH	4
FABP6	4
FAF2	4
FAM171A1	4
FAM20A	4
FAM241B	4
FAM3B	4
FAM50A	4
FAM50B	4
FAM91A1	4
FANCI	4
FBXL15	4
FCGR2A	4
FCGR2C	4
FCHO2	4
FDX1	4
FDXR	4
FGGY	4
FHL1	4
FIP1L1	4
FKBP10	4
FKBP15	4
FKBP2	4
FKBP7	4
FLNC	4
FLT1	4
FMO1	4
FN3K	4
FNBP1L	4
FOXRED1	4
FXYD3	4
FYCO1	4
G3BP2	4
GABBR1	4
GALK2	4
GALNT1	4
GALNT13	4
GALT	4
GATAD2A	4
GATB	4
GBP2	4
GBP6	4
GCLC	4
GDA	4
GGH	4
GGTLC2	4
GGTLC3	4
GID8	4
GIMAP7	4
GINS1	4
GINS4	4
GLRX3	4
GLT8D1	4
GLTP	4
GMEB2	4
GNA13	4
GNA15	4
GNAL	4
GNB1L	4
GNG12	4
GNPNAT1	4
GOLGA2	4
GON7	4
GP2	4
GP6	4
GPC1	4
GPD1L	4
GRIA3	4
GRIPAP1	4
GSDMB	4
GSDMD	4
GSDME	4
GSTM1	4
GSTT1	4
GTF2F1	4
GTF3C3	4
GTF3C4	4
GTPBP4	4
GYS1	4
H2AX	4
HAPLN1	4
HDAC1	4
HDDC2	4
HDHD5	4
HEATR5B	4
HEBP1	4
HELZ2	4
HERC4	4
HES7	4
HGH1	4
HIP1	4
HMGN1	4
HNRNPH3	4
HNRNPK	4
HNRNPR	4
HPGD	4
HPSE	4
HSD17B12	4
HSPA12B	4
HSPA4L	4
HTATSF1	4
HTRA1	4
IAH1	4
IDH3B	4
IDUA	4
IFT27	4
IGF2BP1	4
IGHG3	4
IGHV1-24	4
IGHV1-3	4
IGHV1-46	4
IGHV2-70D	4
IGHV3-64	4
IGHV4-28	4
IGHV4-30-4	4
IGHV4-34	4
IGHV4-38-2	4
IGHV4-59	4
IGHV4-61	4
IGHV5-10-1	4
IGKV1-16	4
IGKV1-5	4
IGKV1D-16	4
IGKV3-15	4
IGLV1-44	4
IGLV2-18	4
IGLV6-57	4
IK	4
IKBKB	4
IL18BP	4
IMPDH1	4
INPP5F	4
INPPL1	4
INTS2	4
INTS3	4
INTS4	4
INTS7	4
IRF2BP2	4
IRF2BPL	4
ISG20	4
ISOC2	4
ITGA5	4
ITGAX	4
ITLN1	4
ITSN2	4
IWS1	4
IYD	4
JAM2	4
JAML	4
JPT2	4
KARS1	4
KDELR2	4
KEAP1	4
KIAA0930	4
KIF13A	4
KIF5A	4
KLC1	4
KLK11	4
KPNA2	4
KPNA3	4
KPNA4	4
KRT222	4
KRT33A	4
KRT82	4
KRT83	4
KRT85	4
KRT87P	4
KYAT3	4
L2HGDH	4
LACTB2	4
LAIR1	4
LAMA2	4
LAMTOR1	4
LAMTOR2	4
LANCL2	4
LARP4B	4
LARP7	4
LARS2	4
LBR	4
LCLAT1	4
LCN2	4
LCP2	4
LDB3	4
LDLRAP1	4
LEMD2	4
LIG4	4
LILRA3	4
LIMS1	4
LIPF	4
LLGL1	4
LOXL1	4
LPAR1	4
LPCAT1	4
LPP	4
LRCH4	4
LRPPRC	4
LRRC59	4
LRRC8A	4
LRRK2	4
LRSAM1	4
LRWD1	4
LSG1	4
LSM5	4
LSM7	4
LSP1	4
LSS	4
LTN1	4
LUC7L	4
LUC7L3	4
LYAR	4
LYPLA1	4
LYRM4	4
MACC1	4
MACROH2A2	4
MAGOH	4
MAGOHB	4
MAN2A1	4
MAN2B2	4
MAP2K4	4
MAP2K7	4
MAP6	4
MAPK10	4
MAPK11	4
MAPK12	4
MAPK13	4
MAPK8IP3	4
MAPRE1	4
MARCKSL1	4
MARCO	4
MARK3	4
MARS1	4
MBD3	4
MBLAC2	4
MBP	4
MDH1	4
MED16	4
MEMO1	4
MESD	4
METTL17	4
MFN1	4
MGAT1	4
MGLL	4
MMP7	4
MORC3	4
MORF4L1	4
MPP5	4
MPP6	4
MRE11	4
MRI1	4
MRPL13	4
MRPL23	4
MRPL45	4
MRPL46	4
MRPS16	4
MRPS17	4
MRPS27	4
MRPS36	4
MSH6	4
MSLN	4
MST1R	4
MTARC2	4
MTFR1L	4
MTHFD1L	4
MTHFD2	4
MTM1	4
MTMR6	4
MTR	4
MTX1	4
MUC4	4
MUC5AC	4
MX2	4
MXRA8	4
MYEF2	4
MYL4	4
MYO5A	4
MYOC	4
MZT2A	4
MZT2B	4
NADK2	4
NAGA	4
NAT10	4
NBEA	4
NBEAL2	4
NCDN	4
NCKIPSD	4
NDRG2	4
NDUFA2	4
NDUFB11	4
NDUFB5	4
NDUFB9	4
NDUFS4	4
NDUFS6	4
NDUFV2	4
NECTIN1	4
NEDD1	4
NEGR1	4
NEK9	4
NELFB	4
NELL2	4
NEXN	4
NF1	4
NGLY1	4
NOLC1	4
NOP2	4
NPL	4
NPRL3	4
NPTN	4
NQO1	4
NT5C2	4
NT5C3A	4
NT5DC1	4
NTS	4
NUBP2	4
NUDCD3	4
NUDT16L1	4
NUDT6	4
NUP210	4
NUP35	4
NUP37	4
NUP54	4
NUP62	4
NUP88	4
NXF1	4
OAS3	4
OAT	4
ODR4	4
OGA	4
OGT	4
OLA1	4
ORC3	4
OSBPL10	4
OSBPL8	4
OTUD7B	4
OTULINL	4
OXNAD1	4
OXR1	4
P4HA2	4
PA2G4	4
PADI2	4
PAK1	4
PALLD	4
PALM	4
PAPOLA	4
PARP4	4
PARVA	4
PARVB	4
PCCA	4
PCYOX1L	4
PCYT2	4
PDCD11	4
PDE4DIP	4
PDE5A	4
PDE8A	4
PDIA2	4
PDIA5	4
PDS5B	4
PDXDC1	4
PDZD11	4
PEAK1	4
PEBP4	4
PECAM1	4
PEF1	4
PES1	4
PEX19	4
PEX5	4
PGM3	4
PGRMC1	4
PHF21A	4
PHF6	4
PHKB	4
PHLDB1	4
PI4KA	4
PIH1D1	4
PIK3R1	4
PIPOX	4
PITPNB	4
PITRM1	4
PKP4	4
PLA2G7	4
PLCD1	4
PLCG1	4
PLEKHA5	4
PLPP3	4
PLXNA4	4
PM20D1	4
PMM2	4
POLD1	4
POLR2C	4
POP1	4
PPFIA2	4
PPFIA4	4
PPFIBP2	4
PPIAL4A	4
PPIAL4C	4
PPIAL4D	4
PPIAL4E	4
PPIAL4F	4
PPIAL4G	4
PPIAL4H	4
PPIE	4
PPIF	4
PPIL1	4
PPME1	4
PPP1R12C	4
PPP1R14A	4
PPP2CA	4
PPP2CB	4
PPP2R2C	4
PPP2R5D	4
PPP4C	4
PPP6C	4
PPT1	4
PQBP1	4
PRAG1	4
PRDX1	4
PRIM2	4
PRKAA2	4
PRKAG1	4
PRKCB	4
PRKCD	4
PRKD2	4
PRMT3	4
PRPF3	4
PRPF31	4
PRPF40A	4
PRPF4B	4
PRPSAP1	4
PRRC1	4
PRRC2C	4
PRRX1	4
PRSS8	4
PRXL2A	4
PSMB2	4
PSMD8	4
PSME3IP1	4
PSMF1	4
PTBP3	4
PTGES3	4
PTPN12	4
PTPN13	4
PTPRA	4
PTPRE	4
PTPRG	4
PTPRZ1	4
PTRHD1	4
PTX3	4
PUF60	4
PURA	4
PXN	4
PYGM	4
PYM1	4
QDPR	4
QKI	4
QRICH1	4
QTRT1	4
RAB11A	4
RAB13	4
RAB15	4
RAB1C	4
RAB21	4
RAB25	4
RAB29	4
RAB32	4
RAB39A	4
RAB3GAP2	4
RAB4A	4
RAB6B	4
RAB8B	4
RABGAP1	4
RABGEF1	4
RAD50	4
RAI14	4
RAP2A	4
RAP2B	4
RAP2C	4
RASA1	4
RBBP7	4
RBFA	4
RBM10	4
RBM15	4
RBM17	4
RBM39	4
RCC1	4
RCN2	4
RCN3	4
RCSD1	4
RDH13	4
RENBP	4
RGPD5	4
RGPD8	4
RIN1	4
RINT1	4
RMC1	4
RMDN1	4
RMDN3	4
RNASEL	4
RNF40	4
RNPEP	4
RO60	4
ROCK1	4
RPL11	4
RPL12	4
RPL13	4
RPL15	4
RPL18	4
RPL26	4
RPL26L1	4
RPL34	4
RPL35	4
RPL7A	4
RPS12	4
RPS17	4
RPS26	4
RPS26P11	4
RPS27L	4
RPS28	4
RPS5	4
RRAD	4
RRAGB	4
RRM1	4
RRM2	4
RRM2B	4
RRP1B	4
RRP9	4
RSL1D1	4
RTCA	4
S100A10	4
S100A13	4
S100A14	4
SAE1	4
SAFB2	4
SAMD1	4
SAMD9	4
SART1	4
SASH3	4
SBNO1	4
SCD	4
SCRIB	4
SDC1	4
SDF2	4
SDF2L1	4
SDF4	4
SEC14L2	4
SEC14L3	4
SEC23IP	4
SEC61B	4
SEC62	4
SEMG2	4
SERPINA2	4
SERPINB9	4
SERPINI2	4
SESTD1	4
SET	4
SFTPA1	4
SFTPA2	4
SGSH	4
SH3BGRL2	4
SH3BGRL3	4
SI	4
SIAE	4
SIGLEC5	4
SIRT2	4
SLC25A1	4
SLC25A11	4
SLC25A31	4
SLC39A7	4
[truncated: 1,327 more rows]

## Sheet: Gene_group_1
Gene set	Gene set Description	GeneRatio	BgRatio	pvalue	p.adjust	qvalue	geneID	Count	Sumer	Sumer_score
hsa04610	Complement and coagulation cascades	34/132	85/8100	5.50918e-40	9.09015e-38	7.30692e-38	C1R/C1S/C2/C3/C4A/C4B/C4BPA/C4BPB/C5/C6/C7/C8A/C8B/C8G/C9/CFB/CFH/CFHR1/CFHR3/CFHR5/CFI/F9/FGA/FGB/FGG/MASP2/PROS1/SERPINA1/SERPIND1/SERPINF2/SERPING1/VSIG4/VTN/VWF	34	sumer	37.1363
GO:0030449	regulation of complement activation	26/213	115/18670	1.18014e-26	3.55929e-23	2.97767e-23	C1R/C1S/C2/C3/C4A/C4B/C4BPA/C4BPB/C5/C6/C7/C8A/C8B/C8G/C9/CFB/CFH/CFHR1/CFHR5/CFI/CPN1/CPN2/PROS1/SERPING1/VSIG4/VTN	26	sumer	22.5261
GO:0002920	regulation of humoral immune response	27/213	134/18670	3.38726e-26	5.10799e-23	4.2733e-23	C1R/C1S/C2/C3/C4A/C4B/C4BPA/C4BPB/C5/C6/C7/C8A/C8B/C8G/C9/CFB/CFH/CFHR1/CFHR5/CFI/CPN1/CPN2/HPX/PROS1/SERPING1/VSIG4/VTN	27	sumer	22.3692
GO:0006956	complement activation	29/213	175/18670	1.68457e-25	1.69355e-22	1.41681e-22	APCS/C1R/C1S/C2/C3/C4A/C4B/C4BPA/C4BPB/C5/C6/C7/C8A/C8B/C8G/C9/CFB/CFH/CFHR1/CFHR5/CFI/CPN1/CPN2/CRP/MASP2/PROS1/SERPING1/VSIG4/VTN	29	sumer	21.8487
GO:0002576	platelet degranulation	26/213	128/18670	2.35357e-25	1.77459e-22	1.4846e-22	A1BG/FERMT3/FGA/FGB/FGG/FLNA/GAS6/ITGB3/ITIH3/ITIH4/LGALS3BP/ORM1/ORM2/POTEKP/PROS1/SCG3/SERPINA1/SERPINA3/SERPINF2/SERPING1/THBS1/TMSB4X/TUBA4A/VCL/VWF/WDR1	26	sumer	21.8284
GO:0006959	humoral immune response	35/213	356/18670	9.08808e-23	5.48193e-20	4.58613e-20	APCS/AZU1/C1R/C1S/C2/C3/C4A/C4B/C4BPA/C4BPB/C5/C6/C7/C8A/C8B/C8G/C9/CFB/CFH/CFHR1/CFHR5/CFI/CPN1/CPN2/CRP/FGA/FGB/HPX/KRT6A/MASP2/PROS1/PSMB10/SERPING1/VSIG4/VTN	35	sumer	19.3386
HALLMARK_COAGULATION	HALLMARK_COAGULATION	29/101	138/4383	3.7913e-21	1.66817e-19	1.51652e-19	C1R/C1S/C2/C3/C8A/C8B/C8G/C9/CFB/CFH/CFI/CPN1/DPP4/F9/FBN1/FGA/FGG/HNF4A/ITGB3/LRP1/MASP2/MMP10/MMP8/PROS1/SERPINA1/SERPING1/THBS1/VWF/WDR1	29	sumer	18.8192
GO:0006957	complement activation, alternative pathway	11/213	16/18670	1.36604e-18	6.86663e-16	5.74456e-16	C3/C5/C7/C8A/C8B/C8G/C9/CFB/CFH/CFHR5/VSIG4	11	sumer	15.2407
GO:0002455	humoral immune response mediated by circulating immunoglobulin	21/213	150/18670	3.64458e-17	1.57029e-14	1.31369e-14	APCS/C1R/C1S/C2/C3/C4A/C4B/C4BPA/C4BPB/C5/C6/C7/C8A/C8B/C8G/C9/CFI/CRP/HPX/MASP2/SERPING1	21	sumer	13.8815
GO:0006958	complement activation, classical pathway	20/213	137/18670	9.12896e-17	3.44162e-14	2.87923e-14	APCS/C1R/C1S/C2/C3/C4A/C4B/C4BPA/C4BPB/C5/C6/C7/C8A/C8B/C8G/C9/CFI/CRP/MASP2/SERPING1	20	sumer	13.5407
GO:0007596	blood coagulation	28/213	336/18670	1.82102e-16	6.10244e-14	5.10525e-14	ACTB/ACTG1/BLOC1S4/C4BPB/CAPZB/CLIC1/F9/FERMT3/FGA/FGB/FGG/FLNA/GAS6/HNF4A/HSPB1/ITGB3/LNPK/PROS1/SAA1/SERPINA1/SERPINA10/SERPIND1/SERPINF2/SERPING1/THBS1/VCL/VTN/VWF	28	sumer	13.292
GO:0007599	hemostasis	28/213	341/18670	2.66902e-16	7.89322e-14	6.60339e-14	ACTB/ACTG1/BLOC1S4/C4BPB/CAPZB/CLIC1/F9/FERMT3/FGA/FGB/FGG/FLNA/GAS6/HNF4A/HSPB1/ITGB3/LNPK/PROS1/SAA1/SERPINA1/SERPINA10/SERPIND1/SERPINF2/SERPING1/THBS1/VCL/VTN/VWF	28	sumer	13.1802
GO:0050817	coagulation	28/213	342/18670	2.87883e-16	7.89322e-14	6.60339e-14	ACTB/ACTG1/BLOC1S4/C4BPB/CAPZB/CLIC1/F9/FERMT3/FGA/FGB/FGG/FLNA/GAS6/HNF4A/HSPB1/ITGB3/LNPK/PROS1/SAA1/SERPINA1/SERPINA10/SERPIND1/SERPINF2/SERPING1/THBS1/VCL/VTN/VWF	28	sumer	13.1802
GO:0002697	regulation of immune effector process	31/213	462/18670	1.717e-15	4.31539e-13	3.61021e-13	C1R/C1S/C2/C3/C4A/C4B/C4BPA/C4BPB/C5/C6/C7/C8A/C8B/C8G/C9/CFB/CFH/CFHR1/CFHR5/CFI/CPN1/CPN2/HPX/ICAM1/LBP/PCBP2/PROS1/PVR/SERPING1/VSIG4/VTN	31	sumer	12.4425
GO:0016064	immunoglobulin mediated immune response	21/213	218/18670	7.65446e-14	1.77584e-11	1.48565e-11	APCS/C1R/C1S/C2/C3/C4A/C4B/C4BPA/C4BPB/C5/C6/C7/C8A/C8B/C8G/C9/CFI/CRP/HPX/MASP2/SERPING1	21	sumer	10.8281
GO:0070527	platelet aggregation	13/213	59/18670	9.79401e-14	2.01848e-11	1.68864e-11	ACTB/ACTG1/BLOC1S4/CLIC1/FERMT3/FGA/FGB/FGG/FLNA/GAS6/HSPB1/ITGB3/VCL	13	sumer	10.7725
GO:0019724	B cell mediated immunity	21/213	221/18670	1.00389e-13	2.01848e-11	1.68864e-11	APCS/C1R/C1S/C2/C3/C4A/C4B/C4BPA/C4BPB/C5/C6/C7/C8A/C8B/C8G/C9/CFI/CRP/HPX/MASP2/SERPING1	21	sumer	10.7725
GO:0006953	acute-phase response	12/213	47/18670	1.31074e-13	2.47074e-11	2.067e-11	APCS/CRP/HP/ITIH4/LBP/ORM1/ORM2/SAA1/SAA2/SERPINA1/SERPINA3/SERPINF2	12	sumer	10.6847
GO:0019835	cytolysis	11/213	40/18670	5.69136e-13	1.00971e-10	8.44718e-11	C5/C6/C7/C8A/C8B/C8G/C9/CFHR1/CFHR5/KRT6A/LBP	11	sumer	10.0733
GO:0002526	acute inflammatory response	15/213	108/18670	1.51399e-12	2.53677e-10	2.12224e-10	APCS/C3/CRP/HP/HPR/ICAM1/ITIH4/LBP/ORM1/ORM2/SAA1/SAA2/SERPINA1/SERPINA3/SERPINF2	15	sumer	9.67321
GO:0034109	homotypic cell-cell adhesion	13/213	81/18670	7.2895e-12	1.15711e-09	9.68029e-10	ACTB/ACTG1/BLOC1S4/CLIC1/FERMT3/FGA/FGB/FGG/FLNA/GAS6/HSPB1/ITGB3/VCL	13	sumer	9.01411
GO:0002449	lymphocyte mediated immunity	23/213	352/18670	1.64656e-11	2.48301e-09	2.07727e-09	APCS/C1R/C1S/C2/C3/C4A/C4B/C4BPA/C4BPB/C5/C6/C7/C8A/C8B/C8G/C9/CFI/CRP/HPX/ICAM1/MASP2/PVR/SERPING1	23	sumer	8.68251
GO:0002460	adaptive immune response based on somatic recombination of immune receptors built from immunoglobulin superfamily domains	23/213	361/18670	2.74236e-11	3.93855e-09	3.29496e-09	APCS/C1R/C1S/C2/C3/C4A/C4B/C4BPA/C4BPB/C5/C6/C7/C8A/C8B/C8G/C9/CFI/CRP/HPX/ICAM1/MASP2/PVR/SERPING1	23	sumer	8.48215
hsa05171	Coronavirus disease - COVID-19	21/132	232/8100	1.19102e-10	9.82593e-09	7.89836e-09	C1R/C1S/C2/C3/C4A/C4B/C5/C6/C7/C8A/C8B/C8G/C9/CFB/FGA/FGB/FGG/MASP2/RPL27/RPS15/VWF	21	sumer	8.10246
GO:0010951	negative regulation of endopeptidase activity	19/213	250/18670	8.02231e-11	1.09979e-08	9.20071e-09	AGT/AMBP/C3/C4A/C4B/C5/GAS6/ITIH3/ITIH4/PROS1/SERPINA1/SERPINA10/SERPINA3/SERPINA6/SERPIND1/SERPINF2/SERPING1/THBS1/VTN	19	sumer	8.03618
GO:0050764	regulation of phagocytosis	13/213	98/18670	8.80386e-11	1.15445e-08	9.65805e-09	AZU1/C2/C3/C4A/C4B/C4BPA/C4BPB/CALR/DNM2/GAS6/LMAN2/LRP1/MFGE8	13	sumer	8.01511
GO:0031589	cell-substrate adhesion	22/213	354/18670	1.22465e-10	1.53898e-08	1.2875e-08	ABI3BP/ARL2/BCAM/CALR/DNM2/FERMT3/FGA/FGB/FGG/FLNA/GAS6/ITGB3/LAMB3/LRP1/NID1/THBS1/THY1/UTRN/VCL/VTN/VWF/ZYX	22	sumer	7.89025
hsa05150	Staphylococcus aureus infection	14/132	96/8100	3.57685e-10	1.96727e-08	1.58134e-08	C1R/C1S/C2/C3/C4A/C4B/C5/CFB/CFH/CFI/FGG/ICAM1/KRT15/MASP2	14	sumer	7.80097
GO:0010466	negative regulation of peptidase activity	19/213	262/18670	1.79237e-10	2.16232e-08	1.80897e-08	AGT/AMBP/C3/C4A/C4B/C5/GAS6/ITIH3/ITIH4/PROS1/SERPINA1/SERPINA10/SERPINA3/SERPINA6/SERPIND1/SERPINF2/SERPING1/THBS1/VTN	19	sumer	7.74257
GO:0030168	platelet activation	15/213	153/18670	2.44394e-10	2.83497e-08	2.37171e-08	ACTB/ACTG1/BLOC1S4/CLIC1/FERMT3/FGA/FGB/FGG/FLNA/GAS6/HSPB1/ITGB3/SAA1/VCL/VWF	15	sumer	7.62494
GO:0050766	positive regulation of phagocytosis	11/213	69/18670	3.36327e-10	3.7569e-08	3.14298e-08	AZU1/C2/C3/C4A/C4B/CALR/DNM2/GAS6/LMAN2/LRP1/MFGE8	11	sumer	7.50266
hsa04145	Phagosome	16/132	152/8100	2.60401e-09	1.07415e-07	8.63435e-08	ACTB/ACTG1/C1R/C3/CALR/CD14/ITGB3/MRC1/NCF1/SEC22B/THBS1/TUBA1A/TUBA1B/TUBA1C/TUBA4A/TUBA8	16	sumer	7.06377
GO:0006909	phagocytosis	21/213	369/18670	1.62754e-09	1.75309e-07	1.46662e-07	ACTB/ACTG1/ACTR2/AZU1/C2/C3/C4A/C4B/C4BPA/C4BPB/CALR/CD14/CRP/DNM2/GAS6/ITGB3/LBP/LMAN2/LRP1/MFGE8/THBS1	21	sumer	6.83368
GO:0043277	apoptotic cell clearance	9/213	46/18670	2.11301e-09	2.19753e-07	1.83843e-07	C2/C3/C4A/C4B/GAS6/ITGB3/LRP1/MFGE8/THBS1	9	sumer	6.73555
GO:0045861	negative regulation of proteolysis	20/213	358/18670	5.56891e-09	5.59861e-07	4.68374e-07	AGT/ALAD/AMBP/C3/C4A/C4B/C5/GAS6/ITIH3/ITIH4/PROS1/SERPINA1/SERPINA10/SERPINA3/SERPINA6/SERPIND1/SERPINF2/SERPING1/THBS1/VTN	20	sumer	6.32941
GO:0030198	extracellular matrix organization	20/213	368/18670	8.87537e-09	8.63488e-07	7.22386e-07	ABI3BP/AGT/DPP4/FBN1/FBN2/FGA/FGB/FGG/GAS6/ICAM1/ITGB3/LAMB3/LRP1/MMP10/MMP8/NID1/SERPINF2/THBS1/VTN/VWF	20	sumer	6.14123
GO:0043062	extracellular structure organization	20/213	369/18670	9.29072e-09	8.7565e-07	7.32561e-07	ABI3BP/AGT/DPP4/FBN1/FBN2/FGA/FGB/FGG/GAS6/ICAM1/ITGB3/LAMB3/LRP1/MMP10/MMP8/NID1/SERPINF2/THBS1/VTN/VWF	20	sumer	6.13516
hsa05133	Pertussis	11/132	76/8100	3.29613e-08	1.08772e-06	8.74341e-07	C1R/C1S/C2/C3/C4A/C4B/C4BPA/C4BPB/C5/CD14/SERPING1	11	sumer	6.05832
GO:0010811	positive regulation of cell-substrate adhesion	12/213	121/18670	1.40237e-08	1.28168e-06	1.07224e-06	ABI3BP/ARL2/CALR/DNM2/FGA/FGB/FGG/FLNA/NID1/THY1/UTRN/VTN	12	sumer	5.96971
GO:0051346	negative regulation of hydrolase activity	22/213	463/18670	1.78072e-08	1.5796e-06	1.32148e-06	AGT/AMBP/APCS/ARL2/C3/C4A/C4B/C5/GAS6/ITIH3/ITIH4/PROS1/SERPINA1/SERPINA10/SERPINA3/SERPINA6/SERPIND1/SERPINF2/SERPING1/SYTL2/THBS1/VTN	22	sumer	5.87894
GO:0042730	fibrinolysis	7/213	28/18670	2.20205e-08	1.89754e-06	1.58746e-06	FGA/FGB/FGG/PROS1/SERPINF2/SERPING1/THBS1	7	sumer	5.7993
hsa05322	Systemic lupus erythematosus	13/132	136/8100	2.78087e-07	7.6474e-06	6.14719e-06	C1R/C1S/C2/C3/C4A/C4B/C5/C6/C7/C8A/C8B/C8G/C9	13	sumer	5.21132
GO:0008228	opsonization	5/213	12/18670	1.36853e-07	1.13912e-05	9.52974e-06	C4B/C4BPA/C4BPB/CRP/LBP	5	sumer	5.02092
GO:0030195	negative regulation of blood coagulation	8/213	53/18670	1.43523e-07	1.13912e-05	9.52974e-06	FGA/FGB/FGG/PROS1/SERPINF2/SERPING1/THBS1/VTN	8	sumer	5.02092
GO:0031638	zymogen activation	8/213	53/18670	1.43523e-07	1.13912e-05	9.52974e-06	C1R/ENO1/F9/FGA/FGB/FGG/SERPINF2/THBS1	8	sumer	5.02092
GO:1900047	negative regulation of hemostasis	8/213	54/18670	1.66844e-07	1.29026e-05	1.07942e-05	FGA/FGB/FGG/PROS1/SERPINF2/SERPING1/THBS1/VTN	8	sumer	4.96681
GO:0010810	regulation of cell-substrate adhesion	14/213	215/18670	1.84601e-07	1.39189e-05	1.16445e-05	ABI3BP/ARL2/CALR/DNM2/FGA/FGB/FGG/FLNA/LRP1/NID1/THBS1/THY1/UTRN/VTN	14	sumer	4.93388
GO:0061045	negative regulation of wound healing	9/213	76/18670	2.03282e-07	1.49536e-05	1.251e-05	APCS/FGA/FGB/FGG/PROS1/SERPINF2/SERPING1/THBS1/VTN	9	sumer	4.90274
GO:0050819	negative regulation of coagulation	8/213	57/18670	2.57315e-07	1.84777e-05	1.54582e-05	FGA/FGB/FGG/PROS1/SERPINF2/SERPING1/THBS1/VTN	8	sumer	4.81084
GO:0002446	neutrophil mediated immunity	21/213	499/18670	2.93074e-07	2.05561e-05	1.7197e-05	A1BG/ACTR2/ALAD/AZU1/C3/CD14/CHI3L1/HP/LRG1/MMP8/NME2/ORM1/ORM2/PGM2/PKM/SERPINA1/SERPINA3/SLC2A3/TCN1/VCL/WDR1	21	sumer	4.76455
GO:0031639	plasminogen activation	6/213	25/18670	3.03683e-07	2.08161e-05	1.74146e-05	ENO1/FGA/FGB/FGG/SERPINF2/THBS1	6
GO:0052548	regulation of endopeptidase activity	19/213	425/18670	4.46952e-07	2.99557e-05	2.50607e-05	AGT/AMBP/C3/C4A/C4B/C5/GAS6/ITIH3/ITIH4/PROS1/SERPINA1/SERPINA10/SERPINA3/SERPINA6/SERPIND1/SERPINF2/SERPING1/THBS1/VTN	19
GO:0072376	protein activation cascade	6/213	27/18670	4.98009e-07	3.19573e-05	2.67352e-05	F9/FGA/FGB/FGG/SERPING1/VWF	6
GO:0072378	blood coagulation, fibrin clot formation	6/213	27/18670	4.98009e-07	3.19573e-05	2.67352e-05	F9/FGA/FGB/FGG/SERPING1/VWF	6
GO:0043312	neutrophil degranulation	20/213	485/18670	7.83103e-07	4.9205e-05	4.11644e-05	A1BG/ACTR2/ALAD/AZU1/C3/CD14/CHI3L1/HP/LRG1/MMP8/NME2/ORM1/ORM2/PGM2/PKM/SERPINA1/SERPINA3/SLC2A3/TCN1/VCL	20
GO:0002283	neutrophil activation involved in immune response	20/213	488/18670	8.61817e-07	5.296e-05	4.43058e-05	A1BG/ACTR2/ALAD/AZU1/C3/CD14/CHI3L1/HP/LRG1/MMP8/NME2/ORM1/ORM2/PGM2/PKM/SERPINA1/SERPINA3/SLC2A3/TCN1/VCL	20
GO:1903035	negative regulation of response to wounding	9/213	90/18670	8.77984e-07	5.296e-05	4.43058e-05	APCS/FGA/FGB/FGG/PROS1/SERPINF2/SERPING1/THBS1/VTN	9
GO:0043687	post-translational protein modification	17/213	361/18670	9.07508e-07	5.36675e-05	4.48978e-05	C3/C4A/CP/FAM20C/FBN1/FGA/FGG/GAS6/MFGE8/P3H1/PSMB10/RAB1B/RCN1/SCG3/SERPINA1/SERPINA10/SERPIND1	17
GO:0052547	regulation of peptidase activity	19/213	452/18670	1.12675e-06	6.53515e-05	5.46725e-05	AGT/AMBP/C3/C4A/C4B/C5/GAS6/ITIH3/ITIH4/PROS1/SERPINA1/SERPINA10/SERPINA3/SERPINA6/SERPIND1/SERPINF2/SERPING1/THBS1/VTN	19
GO:0042119	neutrophil activation	20/213	498/18670	1.17929e-06	6.71084e-05	5.61423e-05	A1BG/ACTR2/ALAD/AZU1/C3/CD14/CHI3L1/HP/LRG1/MMP8/NME2/ORM1/ORM2/PGM2/PKM/SERPINA1/SERPINA3/SLC2A3/TCN1/VCL	20
GO:0007160	cell-matrix adhesion	13/213	225/18670	1.96744e-06	0.000109885	9.19289e-05	BCAM/FGA/FGB/FGG/ITGB3/LRP1/NID1/THBS1/THY1/UTRN/VCL/VTN/ZYX	13
GO:0034446	substrate adhesion-dependent cell spreading	9/213	100/18670	2.14323e-06	0.000117527	9.83218e-05	CALR/DNM2/FERMT3/FGA/FGB/FGG/FLNA/ITGB3/LAMB3	9
GO:0030193	regulation of blood coagulation	8/213	79/18670	3.27724e-06	0.000173432	0.000145091	FGA/FGB/FGG/PROS1/SERPINF2/SERPING1/THBS1/VTN	8
GO:2000425	regulation of apoptotic cell clearance	4/213	10/18670	3.27772e-06	0.000173432	0.000145091	C2/C3/C4A/C4B	4
GO:1900026	positive regulation of substrate adhesion-dependent cell spreading	6/213	37/18670	3.5563e-06	0.000184335	0.000154213	CALR/DNM2/FGA/FGB/FGG/FLNA	6
GO:1900046	regulation of hemostasis	8/213	80/18670	3.60603e-06	0.000184335	0.000154213	FGA/FGB/FGG/PROS1/SERPINF2/SERPING1/THBS1/VTN	8
GO:0045785	positive regulation of cell adhesion	17/213	403/18670	4.02935e-06	0.000202542	0.000169445	ABI3BP/ARL2/AZU1/CALR/DNM2/DPP4/FGA/FGB/FGG/FLNA/ICAM1/NID1/SAA1/SERPINF2/THY1/UTRN/VTN	17
HALLMARK_COMPLEMENT	HALLMARK_COMPLEMENT	16/101	200/4383	9.98615e-06	0.000219695	0.000199723	C1R/C1S/C2/C3/C4BPB/C9/CFB/CFH/CP/DPP4/HNF4A/LRP1/MMP8/SCG3/SERPINA1/SERPING1	16
GO:0050818	regulation of coagulation	8/213	84/18670	5.21573e-06	0.00025788	0.00021574	FGA/FGB/FGG/PROS1/SERPINF2/SERPING1/THBS1/VTN	8
GO:0032760	positive regulation of tumor necrosis factor production	8/213	86/18670	6.22557e-06	0.000302844	0.000253357	AZU1/CD14/HSPB1/LBP/MMP8/ORM1/ORM2/THBS1	8
GO:1903557	positive regulation of tumor necrosis factor superfamily cytokine production	8/213	88/18670	7.39602e-06	0.00035407	0.000296211	AZU1/CD14/HSPB1/LBP/MMP8/ORM1/ORM2/THBS1	8
GO:0002921	negative regulation of humoral immune response	4/213	12/18670	7.58857e-06	0.000357611	0.000299174	C4BPA/C4BPB/SERPING1/VSIG4	4
GO:0050708	regulation of protein secretion	18/213	472/18670	8.40163e-06	0.000389835	0.000326133	ARL2/C5/CD14/CRP/DPP4/FGA/FGB/FGG/GAS6/HNF4A/LRP1/MMP8/MPC2/ORM1/ORM2/P3H1/SAA1/TMSB4X	18
GO:0001894	tissue homeostasis	12/213	229/18670	1.32294e-05	0.000604543	0.000505755	ACACA/ACTB/ACTG1/HSPB1/ITGB3/PLEKHM1/POTEE/POTEF/POTEI/POTEJ/SERPINA3/STRAP	12
GO:0006898	receptor-mediated endocytosis	14/213	314/18670	1.58247e-05	0.000712348	0.000595944	AMBP/AP2M1/C3/CALR/CD14/DNM2/HP/HPR/HPX/ITGB3/LRP1/MRC1/SAA1/VTN	14
GO:0051235	maintenance of location	14/213	315/18670	1.63961e-05	0.000727216	0.000608382	ACACB/ANXA6/ARL2/C3/CALR/CRP/FBN1/FBN2/FLNA/GSTM2/GSTO1/ITGB3/THY1/TMSB4X	14
GO:0002791	regulation of peptide secretion	18/213	500/18670	1.82422e-05	0.000797368	0.000667071	ARL2/C5/CD14/CRP/DPP4/FGA/FGB/FGG/GAS6/HNF4A/LRP1/MMP8/MPC2/ORM1/ORM2/P3H1/SAA1/TMSB4X	18
hsa05020	Prion disease	15/132	273/8100	3.49019e-05	0.000822688	0.0006613	C5/C6/C7/C8A/C8B/C8G/C9/NCF1/NDUFA12/NDUFB4/TUBA1A/TUBA1B/TUBA1C/TUBA4A/TUBA8	15
GO:0050663	cytokine secretion	12/213	240/18670	2.11086e-05	0.000909479	0.000760862	AGT/C5/CD14/CHI3L1/CRP/GAS6/LRP1/MMP8/ORM1/ORM2/SAA1/TMSB4X	12
GO:0001895	retina homeostasis	7/213	74/18670	2.14643e-05	0.000911778	0.000762785	ACTB/ACTG1/HSPB1/POTEE/POTEF/POTEI/POTEJ	7
GO:0034116	positive regulation of heterotypic cell-cell adhesion	4/213	16/18670	2.69181e-05	0.0011159	0.000933555	FGA/FGB/FGG/THY1	4
GO:1900024	regulation of substrate adhesion-dependent cell spreading	6/213	52/18670	2.70096e-05	0.0011159	0.000933555	CALR/DNM2/FGA/FGB/FGG/FLNA	6
GO:2000352	negative regulation of endothelial cell apoptotic process	5/213	33/18670	3.37391e-05	0.00137509	0.00115039	FGA/FGB/FGG/GAS6/ICAM1	5
GO:0042268	regulation of cytolysis	4/213	17/18670	3.48866e-05	0.00140291	0.00117366	CFHR1/CFHR5/KRT6A/LBP	4
GO:1903034	regulation of response to wounding	10/213	179/18670	4.08285e-05	0.00162025	0.00135548	APCS/FGA/FGB/FGG/LRP1/PROS1/SERPINF2/SERPING1/THBS1/VTN	10
GO:0097756	negative regulation of blood vessel diameter	7/213	84/18670	4.90672e-05	0.00192191	0.00160785	ACTA2/AGT/CRP/FGA/FGB/FGG/ICAM1	7
GO:0061041	regulation of wound healing	9/213	148/18670	5.15274e-05	0.00199239	0.00166682	APCS/FGA/FGB/FGG/PROS1/SERPINF2/SERPING1/THBS1/VTN	9
GO:2000351	regulation of endothelial cell apoptotic process	6/213	59/18670	5.59414e-05	0.00213569	0.0017867	FGA/FGB/FGG/GAS6/ICAM1/THBS1	6
GO:0042535	positive regulation of tumor necrosis factor biosynthetic process	4/213	20/18670	6.91366e-05	0.00260645	0.00218053	AZU1/HSPB1/LBP/THBS1	4
GO:0052126	movement in host environment	9/213	158/18670	8.55072e-05	0.00318383	0.00266356	APCS/DPP4/GAS6/ICAM1/ITGB3/KRT6A/MRC1/PVR/VPS4A	9
GO:0009749	response to glucose	10/213	197/18670	9.12809e-05	0.00335736	0.00280873	EIF2B2/GAS6/HNF4A/ICAM1/LRP1/MPC2/NME2/PCK1/TH/THBS1	10
GO:0032680	regulation of tumor necrosis factor production	9/213	160/18670	9.41778e-05	0.00342217	0.00286296	AZU1/CD14/GAS6/HSPB1/LBP/MMP8/ORM1/ORM2/THBS1	9
GO:0072577	endothelial cell apoptotic process	6/213	65/18670	9.689e-05	0.00347881	0.00291034	FGA/FGB/FGG/GAS6/ICAM1/THBS1	6
GO:0032640	tumor necrosis factor production	9/213	163/18670	0.00010856	0.00380716	0.00318504	AZU1/CD14/GAS6/HSPB1/LBP/MMP8/ORM1/ORM2/THBS1	9
GO:1903555	regulation of tumor necrosis factor superfamily cytokine production	9/213	163/18670	0.00010856	0.00380716	0.00318504	AZU1/CD14/GAS6/HSPB1/LBP/MMP8/ORM1/ORM2/THBS1	9
GO:0009746	response to hexose	10/213	202/18670	0.000112301	0.0038931	0.00325693	EIF2B2/GAS6/HNF4A/ICAM1/LRP1/MPC2/NME2/PCK1/TH/THBS1	10
GO:0033627	cell adhesion mediated by integrin	6/213	68/18670	0.0001248	0.00427722	0.00357828	DPP4/FBN1/FERMT3/ICAM1/ITGB3/VTN	6
GO:0071706	tumor necrosis factor superfamily cytokine production	9/213	168/18670	0.000136607	0.00460041	0.00384866	AZU1/CD14/GAS6/HSPB1/LBP/MMP8/ORM1/ORM2/THBS1	9
GO:0034284	response to monosaccharide	10/213	207/18670	0.00013728	0.00460041	0.00384866	EIF2B2/GAS6/HNF4A/ICAM1/LRP1/MPC2/NME2/PCK1/TH/THBS1	10
hsa05146	Amoebiasis	8/132	102/8100	0.000244032	0.00474986	0.00381807	C8A/C8B/C8G/C9/CD14/HSPB1/LAMB3/VCL	8
hsa04613	Neutrophil extracellular trap formation	11/132	190/8100	0.000259083	0.00474986	0.00381807	ACTB/ACTG1/AZU1/C3/C5/FGA/FGB/FGG/ITGB3/NCF1/VWF	11
GO:0022604	regulation of cell morphogenesis	16/213	484/18670	0.000145067	0.00480793	0.00402227	ACTR2/ARHGAP4/CALR/CAPZB/DNM2/FGA/FGB/FGG/FLNA/ICAM1/LRP1/OLFM1/RTN4/SH3KBP1/THY1/WDR1	16
GO:0044409	entry into host	8/213	134/18670	0.000153288	0.00500741	0.00418915	APCS/DPP4/GAS6/ICAM1/ITGB3/KRT6A/MRC1/PVR	8
GO:0050707	regulation of cytokine secretion	10/213	210/18670	0.000154406	0.00500741	0.00418915	C5/CD14/CRP/GAS6/LRP1/MMP8/ORM1/ORM2/SAA1/TMSB4X	10
GO:1904036	negative regulation of epithelial cell apoptotic process	5/213	46/18670	0.000172771	0.00554337	0.00463753	FGA/FGB/FGG/GAS6/ICAM1	5
GO:0010769	regulation of cell morphogenesis involved in differentiation	12/213	301/18670	0.000184699	0.00583863	0.00488455	ACTR2/ARHGAP4/CALR/DNM2/FGA/FGB/FGG/FLNA/LRP1/OLFM1/RTN4/THY1	12
GO:0003018	vascular process in circulatory system	9/213	175/18670	0.000185845	0.00583863	0.00488455	ACTA2/AGT/AZU1/CRP/FGA/FGB/FGG/ICAM1/SERPINF2	9
GO:0016485	protein processing	10/213	217/18670	0.00020149	0.00622247	0.00520566	C1R/CPN1/ENO1/F9/FGA/FGB/FGG/LONP2/SERPINF2/THBS1	10
GO:0034114	regulation of heterotypic cell-cell adhesion	4/213	26/18670	0.000202189	0.00622247	0.00520566	FGA/FGB/FGG/THY1	4
GO:0051186	cofactor metabolic process	15/213	449/18670	0.000209108	0.00637041	0.00532943	ACACA/ACACB/AKR1C1/ALAD/AMBP/GSTA4/GSTM2/GSTO1/HP/HPX/MPC2/PDHB/PPOX/SLC2A3/TCN1	15
GO:0002923	regulation of humoral immune response mediated by circulating immunoglobulin	3/213	11/18670	0.000225805	0.00674286	0.00564102	C4BPA/C4BPB/HPX	3
GO:0045919	positive regulation of cytolysis	3/213	11/18670	0.000225805	0.00674286	0.00564102	CFHR1/CFHR5/LBP	3
GO:0042310	vasoconstriction	6/213	76/18670	0.000231126	0.00683408	0.00571733	ACTA2/AGT/FGA/FGB/FGG/ICAM1	6
GO:0035296	regulation of tube diameter	8/213	143/18670	0.000239544	0.00694677	0.00581161	ACTA2/AGT/CRP/FGA/FGB/FGG/ICAM1/SERPINF2	8
GO:0097746	regulation of blood vessel diameter	8/213	143/18670	0.000239544	0.00694677	0.00581161	ACTA2/AGT/CRP/FGA/FGB/FGG/ICAM1/SERPINF2	8
GO:0035150	regulation of tube size	8/213	144/18670	0.000251189	0.00721509	0.00603608	ACTA2/AGT/CRP/FGA/FGB/FGG/ICAM1/SERPINF2	8
GO:0050714	positive regulation of protein secretion	11/213	268/18670	0.000266751	0.00758983	0.00634958	C5/CD14/FGA/FGB/FGG/LRP1/MMP8/MPC2/ORM1/ORM2/SAA1	11
GO:0090130	tissue migration	13/213	361/18670	0.000270985	0.00763824	0.00639008	ACTA1/ACTA2/ACTC1/ACTG2/AGT/CALR/DPP4/HSPB1/ITGB3/RTN4/STRAP/THBS1/TMSB4X	13
GO:0006936	muscle contraction	13/213	363/18670	0.000285778	0.00798061	0.00667651	ACTA1/ACTA2/ACTC1/ACTG2/AGT/ANXA6/DTNA/ENO1/FLNA/GSTM2/GSTO1/UTRN/VCL	13
GO:0098974	postsynaptic actin cytoskeleton organization	3/213	12/18670	0.000298544	0.00826064	0.00691078	ACTB/ACTG1/POTEKP	3
GO:0072606	interleukin-8 secretion	4/213	29/18670	0.000312728	0.00857444	0.0071733	CD14/CHI3L1/CRP/TMSB4X	4
HALLMARK_APICAL_JUNCTION	HALLMARK_APICAL_JUNCTION	13/101	200/4383	0.000588735	0.00863479	0.00784981	ACTA1/ACTB/ACTC1/ACTG1/ACTG2/DSC3/FBN1/ICAM1/LAMB3/THY1/VCL/VWF/ZYX	13
GO:0009743	response to carbohydrate	10/213	230/18670	0.000321117	0.00872513	0.00729936	EIF2B2/GAS6/HNF4A/ICAM1/LRP1/MPC2/NME2/PCK1/TH/THBS1	10
GO:0010770	positive regulation of cell morphogenesis involved in differentiation	8/213	154/18670	0.000395257	0.0106437	0.00890443	ACTR2/CALR/DNM2/FGA/FGB/FGG/FLNA/LRP1	8
GO:0042168	heme metabolic process	4/213	31/18670	0.000406973	0.0108622	0.00908724	ALAD/AMBP/HPX/PPOX	4
GO:0051047	positive regulation of secretion	14/213	428/18670	0.000419626	0.0111017	0.00928756	AGT/C5/CD14/FGA/FGB/FGG/LRP1/MMP8/MPC2/ORM1/ORM2/SAA1/SYTL2/VPS4A	14
GO:0051604	protein maturation	11/213	285/18670	0.00044923	0.0117816	0.00985634	C1R/CALR/CPN1/ENO1/F9/FGA/FGB/FGG/LONP2/SERPINF2/THBS1	11
hsa05132	Salmonella infection	12/132	249/8100	0.000724178	0.0119489	0.00960488	ACTB/ACTG1/ACTR2/CD14/DNM2/FLNA/PLEKHM1/TUBA1A/TUBA1B/TUBA1C/TUBA4A/TUBA8	12
GO:0045907	positive regulation of vasoconstriction	4/213	32/18670	0.000460985	0.0119856	0.010027	FGA/FGB/FGG/ICAM1	4
GO:0046718	viral entry into host cell	7/213	121/18670	0.000479655	0.0123098	0.0102982	APCS/DPP4/GAS6/ICAM1/ITGB3/MRC1/PVR	7
GO:0010755	regulation of plasminogen activation	3/213	14/18670	0.000485697	0.0123098	0.0102982	ENO1/SERPINF2/THBS1	3
GO:0099188	postsynaptic cytoskeleton organization	3/213	14/18670	0.000485697	0.0123098	0.0102982	ACTB/ACTG1/POTEKP	3
GO:0002793	positive regulation of peptide secretion	11/213	288/18670	0.000490377	0.0123248	0.0103108	C5/CD14/FGA/FGB/FGG/LRP1/MMP8/MPC2/ORM1/ORM2/SAA1	11
GO:1904035	regulation of epithelial cell apoptotic process	6/213	88/18670	0.000511638	0.0126769	0.0106054	FGA/FGB/FGG/GAS6/ICAM1/THBS1	6
GO:0019229	regulation of vasoconstriction	5/213	58/18670	0.000516997	0.0126769	0.0106054	AGT/FGA/FGB/FGG/ICAM1	5
GO:1902041	regulation of extrinsic apoptotic signaling pathway via death domain receptors	5/213	58/18670	0.000516997	0.0126769	0.0106054	FGA/FGB/FGG/ICAM1/THBS1	5
hsa04611	Platelet activation	8/132	124/8100	0.000908536	0.0129777	0.0104318	ACTB/ACTG1/FERMT3/FGA/FGB/FGG/ITGB3/VWF	8
hsa00620	Pyruvate metabolism	5/132	47/8100	0.000943831	0.0129777	0.0104318	ACACA/ACACB/PCK1/PDHB/PKM	5
GO:0051701	interaction with host	9/213	202/18670	0.000534294	0.0129954	0.0108718	APCS/DPP4/GAS6/ICAM1/ITGB3/KRT6A/MRC1/PVR/VPS4A	9
GO:0032732	positive regulation of interleukin-1 production	5/213	59/18670	0.000559687	0.0135041	0.0112974	AZU1/HSPB1/ORM1/ORM2/SAA1	5
GO:0042533	tumor necrosis factor biosynthetic process	4/213	34/18670	0.000584012	0.0138691	0.0116028	AZU1/HSPB1/LBP/THBS1	4
GO:0042534	regulation of tumor necrosis factor biosynthetic process	4/213	34/18670	0.000584012	0.0138691	0.0116028	AZU1/HSPB1/LBP/THBS1	4
GO:0006098	pentose-phosphate shunt	3/213	15/18670	0.000602028	0.0141441	0.0118328	PGM2/RPIA/TKT	3
GO:0033013	tetrapyrrole metabolic process	5/213	60/18670	0.00060497	0.0141441	0.0118328	ALAD/AMBP/HPX/PPOX/TCN1	5
GO:0034113	heterotypic cell-cell adhesion	5/213	61/18670	0.000652946	0.0151483	0.012673	FGA/FGB/FGG/ITGB3/THY1	5
GO:0032102	negative regulation of response to external stimulus	13/213	400/18670	0.000713085	0.0164173	0.0137345	APCS/C5/FGA/FGB/FGG/PCBP2/PROS1/SAA1/SERPINF2/SERPING1/THBS1/VSIG4/VTN	13
GO:0006888	endoplasmic reticulum to Golgi vesicle-mediated transport	9/213	212/18670	0.000755192	0.017255	0.0144354	ANK1/CAPZB/F9/GAS6/LMAN2/PROS1/RAB1B/SEC22B/SERPINA1	9
GO:1903532	positive regulation of secretion by cell	13/213	403/18670	0.000763891	0.0173225	0.0144919	AGT/C5/CD14/FGA/FGB/FGG/LRP1/MMP8/MPC2/ORM1/ORM2/SAA1/VPS4A	13
GO:0045730	respiratory burst	4/213	37/18670	0.000809787	0.0182263	0.0152479	LBP/NCF1/NCF1B/NCF1C	4
GO:0009152	purine ribonucleotide biosynthetic process	8/213	172/18670	0.000820127	0.0183222	0.0153282	ACACA/ACACB/ENO1/MPC2/NME2/PDHB/PKM/TMSB4X	8
GO:0072659	protein localization to plasma membrane	10/213	260/18670	0.000834229	0.0185002	0.0154771	ACTB/ANK1/AP2M1/FLNA/GAS6/LRP1/STX8/SYTL2/TTC7B/VPS4A	10
GO:0071333	cellular response to glucose stimulus	7/213	133/18670	0.000842602	0.0185496	0.0155184	GAS6/ICAM1/LRP1/MPC2/NME2/PCK1/TH	7
GO:0006740	NADPH regeneration	3/213	17/18670	0.000884716	0.0191878	0.0160523	PGM2/RPIA/TKT	3
GO:0006084	acetyl-CoA metabolic process	4/213	38/18670	0.000897042	0.0191878	0.0160523	ACACA/ACACB/MPC2/PDHB	4
GO:0006778	porphyrin-containing compound metabolic process	4/213	38/18670	0.000897042	0.0191878	0.0160523	ALAD/AMBP/HPX/PPOX	4
GO:0048246	macrophage chemotaxis	4/213	38/18670	0.000897042	0.0191878	0.0160523	AZU1/C5/SAA1/THBS1	4
GO:0050921	positive regulation of chemotaxis	7/213	135/18670	0.000919929	0.0193453	0.0161841	AZU1/CALR/GAS6/HSPB1/LBP/THBS1/TMSB4X	7
GO:0071331	cellular response to hexose stimulus	7/213	135/18670	0.000919929	0.0193453	0.0161841	GAS6/ICAM1/LRP1/MPC2/NME2/PCK1/TH	7
GO:0001819	positive regulation of cytokine production	14/213	464/18670	0.000923648	0.0193453	0.0161841	AGT/AZU1/C3/C5/CD14/HSPB1/LBP/LRP1/MMP8/ORM1/ORM2/SAA1/SERPINF2/THBS1	14
GO:0071326	cellular response to monosaccharide stimulus	7/213	136/18670	0.000960633	0.0199812	0.0167161	GAS6/ICAM1/LRP1/MPC2/NME2/PCK1/TH	7
hsa04510	Focal adhesion	10/132	201/8100	0.00159347	0.0202249	0.0162573	ACTB/ACTG1/FLNA/ITGB3/LAMB3/THBS1/VCL/VTN/VWF/ZYX	10
GO:1902042	negative regulation of extrinsic apoptotic signaling pathway via death domain receptors	4/213	39/18670	0.000990712	0.0204657	0.0171214	FGA/FGB/FGG/ICAM1	4
GO:0007597	blood coagulation, intrinsic pathway	3/213	18/18670	0.00105277	0.0214537	0.017948	F9/SERPING1/VWF	3
GO:1902001	fatty acid transmembrane transport	3/213	18/18670	0.00105277	0.0214537	0.017948	ACACA/ACACB/THBS1	3
GO:0050715	positive regulation of cytokine secretion	7/213	139/18670	0.00109131	0.02209	0.0184803	C5/CD14/LRP1/MMP8/ORM1/ORM2/SAA1	7
GO:0006900	vesicle budding from membrane	6/213	102/18670	0.00111442	0.0222589	0.0186216	AP2M1/DNM2/RAB1B/SEC22B/SERPINA1/VPS4A	6
GO:2000379	positive regulation of reactive oxygen species metabolic process	6/213	102/18670	0.00111442	0.0222589	0.0186216	AGT/CRP/DNM2/ICAM1/MMP8/THBS1	6
hsa05418	Fluid shear stress and atherosclerosis	8/132	139/8100	0.00189575	0.0223428	0.0179597	ACTB/ACTG1/GSTA4/GSTM2/GSTO1/ICAM1/ITGB3/NCF1	8
GO:0032535	regulation of cellular component size	12/213	370/18670	0.00115719	0.0229587	0.019207	ACTR2/AP2M1/ARHGAP4/CAPZB/DNM2/HP1BP3/ICAM1/LRP1/OLFM1/RTN4/TMSB4X/WDR1	12
GO:0007229	integrin-mediated signaling pathway	6/213	103/18670	0.00117229	0.0229587	0.019207	FERMT3/FLNA/ITGB3/NME2/THY1/ZYX	6
GO:0032652	regulation of interleukin-1 production	6/213	103/18670	0.00117229	0.0229587	0.019207	AZU1/GAS6/HSPB1/ORM1/ORM2/SAA1	6
GO:0019882	antigen processing and presentation	9/213	226/18670	0.00118439	0.023046	0.0192801	AP2M1/CALR/CAPZB/DNM2/ICAM1/NCF1/PSMB10/SEC22B/THBS1	9
GO:0002922	positive regulation of humoral immune response	3/213	19/18670	0.0012397	0.0239675	0.020051	C3/C6/HPX	3
GO:0009260	ribonucleotide biosynthetic process	8/213	185/18670	0.00131114	0.0251872	0.0210714	ACACA/ACACB/ENO1/MPC2/NME2/PDHB/PKM/TMSB4X	8
GO:0071322	cellular response to carbohydrate stimulus	7/213	144/18670	0.00133975	0.0254132	0.0212604	GAS6/ICAM1/LRP1/MPC2/NME2/PCK1/TH	7
GO:1904064	positive regulation of cation transmembrane transport	7/213	144/18670	0.00133975	0.0254132	0.0212604	AGT/DNM2/FLNA/GSTM2/GSTO1/THY1/TMSB4X	7
GO:0019058	viral life cycle	11/213	328/18670	0.00141569	0.0266857	0.022325	APCS/DPP4/GAS6/ICAM1/ITGB3/MRC1/PCBP2/PVR/RAB1B/VPS4A/YTHDC2	11
GO:0045429	positive regulation of nitric oxide biosynthetic process	4/213	43/18670	0.00143458	0.0268739	0.0224824	AGT/DNM2/ICAM1/MMP8	4
GO:0006801	superoxide metabolic process	5/213	73/18670	0.00147638	0.0274862	0.0229947	AGT/CRP/NCF1/NCF1B/NCF1C	5
GO:0002683	negative regulation of immune system process	13/213	435/18670	0.00152342	0.028188	0.0235818	AMBP/APCS/C4BPA/C4BPB/C5/FBN1/FGL1/NME2/PCBP2/SERPING1/THBS1/THY1/VSIG4	13
GO:1904407	positive regulation of nitric oxide metabolic process	4/213	44/18670	0.00156409	0.0287641	0.0240638	AGT/DNM2/ICAM1/MMP8	4
GO:0072593	reactive oxygen species metabolic process	10/213	284/18670	0.00161858	0.0295856	0.024751	AGT/CRP/DNM2/HP/ICAM1/MMP8/NCF1/NCF1B/NCF1C/THBS1	10
GO:0006164	purine nucleotide biosynthetic process	8/213	192/18670	0.00165898	0.0297827	0.0249159	ACACA/ACACB/ENO1/MPC2/NME2/PDHB/PKM/TMSB4X	8
GO:0044272	sulfur compound biosynthetic process	8/213	192/18670	0.00165898	0.0297827	0.0249159	ACACA/ACACB/B4GALT5/GSTA4/GSTM2/GSTO1/MPC2/PDHB	8
GO:0046390	ribose phosphate biosynthetic process	8/213	192/18670	0.00165898	0.0297827	0.0249159	ACACA/ACACB/ENO1/MPC2/NME2/PDHB/PKM/TMSB4X	8
GO:1904469	positive regulation of tumor necrosis factor secretion	3/213	21/18670	0.00167321	0.0298603	0.0249808	MMP8/ORM1/ORM2	3
GO:0051222	positive regulation of protein transport	13/213	440/18670	0.00168545	0.0299019	0.0250156	C5/CD14/FGA/FGB/FGG/FLNA/GAS6/LRP1/MMP8/MPC2/ORM1/ORM2/SAA1	13
GO:1904019	epithelial cell apoptotic process	6/213	111/18670	0.00172215	0.0303742	0.0254108	FGA/FGB/FGG/GAS6/ICAM1/THBS1	6
GO:0005996	monosaccharide metabolic process	10/213	287/18670	0.00174886	0.0306661	0.0256549	ACACB/ENO1/GSTO1/PCK1/PDHB/PGM2/PKM/RPIA/SLC2A3/TKT	10
GO:0070268	cornification	6/213	112/18670	0.00180265	0.0314265	0.0262911	DSC3/KRT15/KRT6A/KRT6C/KRT75/KRT84	6
GO:0001678	cellular glucose homeostasis	7/213	152/18670	0.00182694	0.031667	0.0264924	GAS6/ICAM1/LRP1/MPC2/NME2/PCK1/TH	7
GO:0010883	regulation of lipid storage	4/213	46/18670	0.00184712	0.0318338	0.0266319	ACACB/C3/CRP/ITGB3	4
GO:1901224	positive regulation of NIK/NF-kappaB signaling	5/213	77/18670	0.00187208	0.0320806	0.0268384	CALR/CD14/CHI3L1/MMP8/RBCK1	5
GO:1901685	glutathione derivative metabolic process	3/213	22/18670	0.00192121	0.0325526	0.0272332	GSTA4/GSTM2/GSTO1	3
GO:1901687	glutathione derivative biosynthetic process	3/213	22/18670	0.00192121	0.0325526	0.0272332	GSTA4/GSTM2/GSTO1	3
GO:0090287	regulation of cellular response to growth factor stimulus	10/213	292/18670	0.00198479	0.0334421	0.0279773	AGT/DNM2/FAM20C/FBN1/FBN2/ITGB3/LRG1/STRAP/THBS1/VTN	10
GO:2001236	regulation of extrinsic apoptotic signaling pathway	7/213	155/18670	0.00204143	0.0342053	0.0286159	AGT/FGA/FGB/FGG/ICAM1/RBCK1/THBS1	7
GO:0032612	interleukin-1 production	6/213	115/18670	0.00206133	0.0343479	0.0287352	AZU1/GAS6/HSPB1/ORM1/ORM2/SAA1	6
GO:0034767	positive regulation of ion transmembrane transport	7/213	156/18670	0.0021171	0.0348916	0.02919	AGT/DNM2/FLNA/GSTM2/GSTO1/THY1/TMSB4X	7
GO:1905952	regulation of lipid localization	7/213	156/18670	0.0021171	0.0348916	0.02919	ACACB/AGT/C3/CRP/ITGB3/LRP1/THBS1	7
GO:1901222	regulation of NIK/NF-kappaB signaling	6/213	117/18670	0.00224874	0.0368599	0.0308366	CALR/CD14/CHI3L1/MMP8/RBCK1/TMSB4X	6
GO:1904951	positive regulation of establishment of protein localization	13/213	456/18670	0.00230282	0.0375421	0.0314074	C5/CD14/FGA/FGB/FGG/FLNA/GAS6/LRP1/MMP8/MPC2/ORM1/ORM2/SAA1	13
GO:0034764	positive regulation of transmembrane transport	8/213	204/18670	0.0024217	0.039268	0.0328512	AGT/C3/DNM2/FLNA/GSTM2/GSTO1/THY1/TMSB4X	8
GO:0032637	interleukin-8 production	5/213	82/18670	0.00246957	0.039829	0.0333206	CD14/CHI3L1/CRP/LBP/TMSB4X	5
GO:2001026	regulation of endothelial cell chemotaxis	3/213	24/18670	0.00248303	0.039829	0.0333206	HSPB1/THBS1/TMSB4X	3
GO:0072522	purine-containing compound biosynthetic process	8/213	205/18670	0.00249592	0.039829	0.0333206	ACACA/ACACB/ENO1/MPC2/NME2/PDHB/PKM/TMSB4X	8
GO:0070741	response to interleukin-6	4/213	50/18670	0.00251604	0.0399388	0.0334124	CHI3L1/FGG/ICAM1/PCK1	4
GO:0017015	regulation of transforming growth factor beta receptor signaling pathway	6/213	120/18670	0.00255359	0.0403227	0.0337336	DNM2/FBN1/FBN2/LRG1/STRAP/THBS1	6
GO:0060326	cell chemotaxis	10/213	304/18670	0.00265692	0.0415958	0.0347987	AZU1/C5/CALR/GAS6/HSPB1/LBP/SAA1/SAA2/THBS1/TMSB4X	10
GO:0048675	axon extension	6/213	121/18670	0.0026618	0.0415958	0.0347987	ARHGAP4/DNM2/LRP1/OLFM1/RTN4/VCL	6
GO:0002712	regulation of B cell mediated immunity	4/213	51/18670	0.00270611	0.0418545	0.035015	C3/C4BPA/C4BPB/HPX	4
GO:0002889	regulation of immunoglobulin mediated immune response	4/213	51/18670	0.00270611	0.0418545	0.035015	C3/C4BPA/C4BPB/HPX	4
GO:0090276	regulation of peptide hormone secretion	8/213	208/18670	0.00272931	0.0419852	0.0351244	ARL2/DPP4/FGA/FGB/FGG/HNF4A/LRP1/MPC2	8
GO:0050730	regulation of peptidyl-tyrosine phosphorylation	9/213	256/18670	0.00276946	0.0419852	0.0351244	AGT/GAS6/HPX/ICAM1/ITGB3/NCF1/THY1/VPS25/VTN	9
GO:1903844	regulation of cellular response to transforming growth factor beta stimulus	6/213	122/18670	0.00277341	0.0419852	0.0351244	DNM2/FBN1/FBN2/LRG1/STRAP/THBS1	6
GO:0003071	renal system process involved in regulation of systemic arterial blood pressure	3/213	25/18670	0.00279808	0.0419852	0.0351244	AGT/GAS6/SERPINF2	3
GO:0051156	glucose 6-phosphate metabolic process	3/213	25/18670	0.00279808	0.0419852	0.0351244	PGM2/RPIA/TKT	3
GO:2000482	regulation of interleukin-8 secretion	3/213	25/18670	0.00279808	0.0419852	0.0351244	CD14/CRP/TMSB4X	3
GO:0032731	positive regulation of interleukin-1 beta production	4/213	52/18670	0.00290579	0.0431717	0.0361171	AZU1/HSPB1/ORM1/ORM2	4
GO:0072132	mesenchyme morphogenesis	4/213	52/18670	0.00290579	0.0431717	0.0361171	ACTA1/ACTA2/ACTC1/ACTG2	4
GO:0010876	lipid localization	12/213	415/18670	0.00299988	0.0443511	0.0371037	ACACA/ACACB/AGT/AKR1C1/APOF/C3/CRP/ITGB3/LBP/LRP1/THBS1/VPS4A	12
GO:0008625	extrinsic apoptotic signaling pathway via death domain receptors	5/213	86/18670	0.00303882	0.0446198	0.0373285	FGA/FGB/FGG/ICAM1/THBS1	5
GO:0010038	response to metal ion	11/213	362/18670	0.00304764	0.0446198	0.0373285	ACTA1/ALAD/CALR/CD14/FGA/FGB/FGG/ICAM1/NCF1/TH/THBS1	11
GO:0003012	muscle system process	13/213	472/18670	0.00309538	0.0449432	0.037599	ACTA1/ACTA2/ACTC1/ACTG2/AGT/ANXA6/DTNA/ENO1/FLNA/GSTM2/GSTO1/UTRN/VCL	13
GO:0050704	regulation of interleukin-1 secretion	4/213	53/18670	0.00311532	0.0449432	0.037599	GAS6/ORM1/ORM2/SAA1	4
GO:1905517	macrophage migration	4/213	53/18670	0.00311532	0.0449432	0.037599	AZU1/C5/SAA1/THBS1	4
GO:0045471	response to ethanol	6/213	125/18670	0.00312933	0.0449432	0.037599	ACTC1/ACTR2/ALAD/CD14/ICAM1/TH	6
GO:0034612	response to tumor necrosis factor	10/213	312/18670	0.00319846	0.0455911	0.0381411	CD14/CHI3L1/GAS6/ICAM1/PCK1/PSMB10/RBCK1/THBS1/TMSB4X/YTHDC2	10
GO:0001906	cell killing	7/213	168/18670	0.00320468	0.0455911	0.0381411	AZU1/C3/C9/CFH/ICAM1/KRT6A/PVR	7
GO:0046883	regulation of hormone secretion	9/213	262/18670	0.0032293	0.0457257	0.0382537	AGT/ARL2/DPP4/FGA/FGB/FGG/HNF4A/LRP1/MPC2	9
GO:0035384	thioester biosynthetic process	4/213	54/18670	0.00333493	0.0466405	0.039019	ACACA/ACACB/MPC2/PDHB	4
GO:0071616	acyl-CoA biosynthetic process	4/213	54/18670	0.00333493	0.0466405	0.039019	ACACA/ACACB/MPC2/PDHB	4
GO:0070374	positive regulation of ERK1 and ERK2 cascade	8/213	215/18670	0.0033403	0.0466405	0.039019	CHI3L1/FGA/FGB/FGG/GAS6/ICAM1/LRP1/SERPINF2	8
GO:0061097	regulation of protein tyrosine kinase activity	5/213	88/18670	0.0033564	0.0466493	0.0390264	AGT/GAS6/NCF1/THY1/VPS25	5
GO:0048193	Golgi vesicle transport	11/213	368/18670	0.00345153	0.0477514	0.0399484	ANK1/CAPZB/DNM2/F9/GAS6/GOLGA3/LMAN2/PROS1/RAB1B/SEC22B/SERPINA1	11
GO:0043032	positive regulation of macrophage activation	3/213	27/18670	0.00349936	0.0477888	0.0399797	LBP/MMP8/THBS1	3
GO:0002687	positive regulation of leukocyte migration	6/213	128/18670	0.0035183	0.0477888	0.0399797	CALR/GAS6/ICAM1/LBP/THBS1/THY1	6
GO:0010595	positive regulation of endothelial cell migration	6/213	128/18670	0.0035183	0.0477888	0.0399797	AGT/CALR/HSPB1/ITGB3/THBS1/TMSB4X	6
GO:0050920	regulation of chemotaxis	8/213	217/18670	0.00353302	0.0477888	0.0399797	AZU1/C5/CALR/GAS6/HSPB1/LBP/THBS1/TMSB4X	8
GO:0010634	positive regulation of epithelial cell migration	7/213	171/18670	0.00353346	0.0477888	0.0399797	AGT/CALR/HSPB1/ITGB3/RTN4/THBS1/TMSB4X	7
GO:0043030	regulation of macrophage activation	4/213	55/18670	0.00356484	0.047998	0.0401547	LBP/MMP8/THBS1/VSIG4	4
hsa00010	Glycolysis / Gluconeogenesis	5/132	67/8100	0.00458622	0.0494006	0.0397096	ENO1/PCK1/PDHB/PGM2/PKM	5
hsa05130	Pathogenic Escherichia coli infection	9/132	197/8100	0.00479037	0.0494006	0.0397096	ABCF2/ACTB/ACTG1/ACTR2/TUBA1A/TUBA1B/TUBA1C/TUBA4A/TUBA8	9
GO:0045185	maintenance of protein location	5/213	90/18670	0.00369719	0.0495587	0.0414604	ARL2/FBN1/FBN2/FLNA/TMSB4X	5
GO:1990778	protein localization to cell periphery	10/213	319/18670	0.0037414	0.0499294	0.0417705	ACTB/ANK1/AP2M1/FLNA/GAS6/LRP1/STX8/SYTL2/TTC7B/VPS4A	10
GO:0048488	synaptic vesicle endocytosis	4/213	56/18670	0.00380529	0.0503366	0.0421112	ACTB/ACTG1/DNM2/POTEKP	4
GO:0140238	presynaptic endocytosis	4/213	56/18670	0.00380529	0.0503366	0.0421112	ACTB/ACTG1/DNM2/POTEKP	4
HALLMARK_EPITHELIAL_MESENCHYMAL_TRANSITION	HALLMARK_EPITHELIAL_MESENCHYMAL_TRANSITION	11/101	200/4383	0.00584333	0.0514213	0.0467467	ABI3BP/ACTA2/FBN1/FBN2/FLNA/ITGB3/LRP1/P3H1/PVR/THBS1/THY1	11
HALLMARK_XENOBIOTIC_METABOLISM	HALLMARK_XENOBIOTIC_METABOLISM	11/101	200/4383	0.00584333	0.0514213	0.0467467	ACP1/CFB/CRP/GSTO1/HNF4A/ITIH4/MAN1A1/PROS1/PSMB10/SERPINA6/VTN	11
GO:0048871	multicellular organismal homeostasis	13/213	486/18670	0.00395984	0.0521523	0.0436301	ACACA/ACACB/ACTB/ACTG1/HSPB1/ITGB3/PLEKHM1/POTEE/POTEF/POTEI/POTEJ/SERPINA3/STRAP	13
GO:0002478	antigen processing and presentation of exogenous peptide antigen	7/213	175/18670	0.00401107	0.0525974	0.0440025	AP2M1/CALR/CAPZB/DNM2/NCF1/PSMB10/SEC22B	7
GO:1903428	positive regulation of reactive oxygen species biosynthetic process	4/213	57/18670	0.0040565	0.0529627	0.0443081	AGT/DNM2/ICAM1/MMP8	4
GO:1901184	regulation of ERBB signaling pathway	5/213	93/18670	0.00425389	0.0551789	0.0461621	AGT/NCF1/RTN4/SH3KBP1/VPS25	5
GO:0016050	vesicle organization	10/213	325/18670	0.00426283	0.0551789	0.0461621	AP2M1/BLOC1S4/CALR/DNM2/RAB1B/SEC22B/SERPINA1/STX8/VPS25/VPS4A	10
GO:0032722	positive regulation of chemokine production	4/213	58/18670	0.00431868	0.055663	0.0465672	AZU1/C5/LBP/LRP1	4
GO:0042116	macrophage activation	5/213	95/18670	0.00465672	0.0591895	0.0495174	AZU1/LBP/MMP8/THBS1/VSIG4	5
GO:1903076	regulation of protein localization to plasma membrane	5/213	95/18670	0.00465672	0.0591895	0.0495174	ACTB/AP2M1/LRP1/STX8/VPS4A	5
GO:0071346	cellular response to interferon-gamma	7/213	180/18670	0.00467517	0.0591895	0.0495174	ACTG1/ACTR2/HPX/ICAM1/MRC1/STX8/ZYX	7
GO:0071466	cellular response to xenobiotic stimulus	7/213	180/18670	0.00467517	0.0591895	0.0495174	AKR1C1/GSTA4/GSTM2/GSTO1/HNF4A/ICAM1/PCK1	7
GO:0060249	anatomical structure homeostasis	12/213	439/18670	0.00469042	0.0591895	0.0495174	ACACA/ACTB/ACTG1/HSPB1/ITGB3/PLEKHM1/POTEE/POTEF/POTEI/POTEJ/SERPINA3/STRAP	12
GO:0010743	regulation of macrophage derived foam cell differentiation	3/213	30/18670	0.00473694	0.0595276	0.0498002	AGT/CRP/ITGB3	3
hsa04530	Tight junction	8/132	169/8100	0.00626255	0.0607836	0.0488595	ACTB/ACTG1/ACTR2/TUBA1A/TUBA1B/TUBA1C/TUBA4A/TUBA8	8
hsa04210	Apoptosis	7/132	136/8100	0.00666917	0.0611341	0.0491413	ACTB/ACTG1/TUBA1A/TUBA1B/TUBA1C/TUBA4A/TUBA8	7

## Sheet: Gene_group_2
ID	Description	GeneRatio	BgRatio	pvalue	p.adjust	qvalue	geneID	Count	Sumer	Sumer_score
GO:0043312	neutrophil degranulation	62/692	485/18670	1.15282e-17	3.7731e-14	3.18558e-14	AOC1/ARG1/ATP6V0A1/B4GALT1/CAND1/CCT2/CD44/CD58/CD63/COPB1/CRISP3/CYFIP1/DNAJC3/DSG1/DYNC1LI1/EEF1A1/EEF2/GMFG/GRN/HMGB1/HMOX2/HSP90AA1/HSPA1A/HSPA1B/IGF2R/ITGAL/ITGAV/MMP9/MPO/NCKAP1L/OLFM4/OSTF1/PDAP1/PIGR/PKP1/PNP/PRTN3/PSAP/PSEN1/PSMB1/PSMB7/PSMC2/PSMD11/PSMD2/QSOX1/RAB14/RAB18/RAB27A/RAB4B/RAB7A/RAC1/RAP1A/RAP1B/SERPINB12/SIRPA/SIRPB1/SNAP25/SNAP29/SYK/TCIRG1/TOM1/VNN1	62	sumer	13.4968
GO:0002283	neutrophil activation involved in immune response	62/692	488/18670	1.56398e-17	3.7731e-14	3.18558e-14	AOC1/ARG1/ATP6V0A1/B4GALT1/CAND1/CCT2/CD44/CD58/CD63/COPB1/CRISP3/CYFIP1/DNAJC3/DSG1/DYNC1LI1/EEF1A1/EEF2/GMFG/GRN/HMGB1/HMOX2/HSP90AA1/HSPA1A/HSPA1B/IGF2R/ITGAL/ITGAV/MMP9/MPO/NCKAP1L/OLFM4/OSTF1/PDAP1/PIGR/PKP1/PNP/PRTN3/PSAP/PSEN1/PSMB1/PSMB7/PSMC2/PSMD11/PSMD2/QSOX1/RAB14/RAB18/RAB27A/RAB4B/RAB7A/RAC1/RAP1A/RAP1B/SERPINB12/SIRPA/SIRPB1/SNAP25/SNAP29/SYK/TCIRG1/TOM1/VNN1	62	sumer	13.4968
GO:0042119	neutrophil activation	62/692	498/18670	4.2407e-17	5.64291e-14	4.76423e-14	AOC1/ARG1/ATP6V0A1/B4GALT1/CAND1/CCT2/CD44/CD58/CD63/COPB1/CRISP3/CYFIP1/DNAJC3/DSG1/DYNC1LI1/EEF1A1/EEF2/GMFG/GRN/HMGB1/HMOX2/HSP90AA1/HSPA1A/HSPA1B/IGF2R/ITGAL/ITGAV/MMP9/MPO/NCKAP1L/OLFM4/OSTF1/PDAP1/PIGR/PKP1/PNP/PRTN3/PSAP/PSEN1/PSMB1/PSMB7/PSMC2/PSMD11/PSMD2/QSOX1/RAB14/RAB18/RAB27A/RAB4B/RAB7A/RAC1/RAP1A/RAP1B/SERPINB12/SIRPA/SIRPB1/SNAP25/SNAP29/SYK/TCIRG1/TOM1/VNN1	62	sumer	13.322
GO:0002446	neutrophil mediated immunity	62/692	499/18670	4.67806e-17	5.64291e-14	4.76423e-14	AOC1/ARG1/ATP6V0A1/B4GALT1/CAND1/CCT2/CD44/CD58/CD63/COPB1/CRISP3/CYFIP1/DNAJC3/DSG1/DYNC1LI1/EEF1A1/EEF2/GMFG/GRN/HMGB1/HMOX2/HSP90AA1/HSPA1A/HSPA1B/IGF2R/ITGAL/ITGAV/MMP9/MPO/NCKAP1L/OLFM4/OSTF1/PDAP1/PIGR/PKP1/PNP/PRTN3/PSAP/PSEN1/PSMB1/PSMB7/PSMC2/PSMD11/PSMD2/QSOX1/RAB14/RAB18/RAB27A/RAB4B/RAB7A/RAC1/RAP1A/RAP1B/SERPINB12/SIRPA/SIRPB1/SNAP25/SNAP29/SYK/TCIRG1/TOM1/VNN1	62	sumer	13.322
GO:0006520	cellular amino acid metabolic process	44/692	348/18670	1.07115e-12	1.03366e-09	8.72704e-10	AARS2/AARSD1/ACAT1/ADSS2/AGMAT/ALDH5A1/ALDH7A1/ARG1/ART4/ASL/ATP2B4/BCAT2/BHMT/BHMT2/CPS1/CTPS1/DGLUCY/GGT5/GLUD1/GPT/HARS1/IARS1/IVD/MCCC1/MCCC2/NOS1/PADI4/PLOD1/PPA1/PSMA8/PSMB1/PSMB7/PSMC2/PSMC6/PSMD11/PSMD2/PSMD5/PSMD9/PSME1/RIDA/SARS2/SEPHS2/TARS3/YARS1	44	sumer	9.05913
GO:0006163	purine nucleotide metabolic process	48/692	432/18670	1.13892e-11	8.92343e-09	7.53393e-09	ABCD1/ACAT1/ACSL1/ACSL3/ADSS2/AK4/AK5/ATP5F1A/ATP5F1B/ATP5MF/ATP5PB/CBR4/DCAKD/DLAT/DLG1/ELOVL7/FASN/FBP1/FOXK1/GPX1/GUCA2A/GUCY1B1/HK1/HK2/HMGCS2/HSD17B8/MCCC2/MPP1/NME3/NOS1/NT5C/NT5E/NUP133/NUP205/NUP85/NUP98/PAPSS2/PARP1/PDK1/PDK2/PDK4/PDPR/PNP/PSEN1/SAMHD1/SEH1L/SLC25A13/SULT1B1	48	sumer	8.12298
GO:0072521	purine-containing compound metabolic process	50/692	464/18670	1.29459e-11	8.92343e-09	7.53393e-09	ABCD1/ACAT1/ACSL1/ACSL3/ADSS2/AK4/AK5/AOX1/ATP5F1A/ATP5F1B/ATP5MF/ATP5PB/CARMIL1/CBR4/DCAKD/DLAT/DLG1/ELOVL7/FASN/FBP1/FOXK1/GPX1/GUCA2A/GUCY1B1/HK1/HK2/HMGCS2/HSD17B8/MCCC2/MPP1/NME3/NOS1/NT5C/NT5E/NUP133/NUP205/NUP85/NUP98/PAPSS2/PARP1/PDK1/PDK2/PDK4/PDPR/PNP/PSEN1/SAMHD1/SEH1L/SLC25A13/SULT1B1	50	sumer	8.12298
GO:0006402	mRNA catabolic process	41/692	364/18670	2.47917e-10	1.49525e-07	1.26242e-07	AGO3/CNOT1/DCPS/FXR2/GSPT2/HNRNPD/HSPA1A/HSPA1B/PDE12/PKP1/PPP2R1A/PRKCA/PSMA8/PSMB1/PSMB7/PSMC2/PSMC6/PSMD11/PSMD2/PSMD5/PSMD9/PSME1/RBM8A/RIDA/RPL10A/RPL17/RPL18A/RPL22/RPL24/RPL30/RPL36/RPS10/RPS15A/RPS23/RPS24/SCGB1A1/THRAP3/UPF1/YBX1/YBX3/ZC3HAV1	41	sumer	6.8988
GO:1903311	regulation of mRNA metabolic process	38/692	324/18670	3.55862e-10	1.90782e-07	1.61074e-07	CCNT1/CDC73/CNOT1/DDX17/FXR2/HNRNPD/HSPA1A/KHDRBS1/KHDRBS2/NUP98/PAF1/PDE12/PKP1/PRKCA/PRPF19/PSMA8/PSMB1/PSMB7/PSMC2/PSMC6/PSMD11/PSMD2/PSMD5/PSMD9/PSME1/RBM3/RBM8A/RIDA/SART3/SCGB1A1/SRSF4/SRSF7/SRSF9/THRAP3/UPF1/YBX1/YBX3/ZC3HAV1	38	sumer	6.79297
GO:0006790	sulfur compound metabolic process	41/692	372/18670	4.81438e-10	2.32294e-07	1.96123e-07	ABCD1/ACAT1/ACSL1/ACSL3/ALDH5A1/B3GALT6/B4GALT1/B4GAT1/BHMT/BHMT2/CBR4/CHST3/CIAO1/CPS1/DLAT/ELOVL7/ESD/ETHE1/FASN/GGCT/GGT2/GGT5/GPX1/GSTA5/GSTM4/HEXA/HMGCS2/HSD17B8/ISCA2/MCCC1/MCCC2/MICAL1/OMD/PAPSS2/PDK1/PDK2/PDK4/PDPR/PRELP/STAT5B/SULT1B1	41	sumer	6.70747
GO:0072522	purine-containing compound biosynthetic process	29/692	205/18670	5.84333e-10	2.5631e-07	2.16399e-07	ACAT1/ACSL1/ACSL3/ADSS2/AK4/AK5/ATP5F1A/ATP5F1B/ATP5MF/ATP5PB/CBR4/DCAKD/DLAT/ELOVL7/FASN/GUCA2A/GUCY1B1/HSD17B8/NME3/NOS1/NT5E/PAPSS2/PARP1/PDK1/PDK2/PDK4/PDPR/PNP/SLC25A13	29	sumer	6.66474
GO:0019693	ribose phosphate metabolic process	44/692	424/18670	7.58299e-10	3.049e-07	2.57423e-07	ABCD1/ACAT1/ACSL1/ACSL3/ADSS2/AK4/AK5/ATP5F1A/ATP5F1B/ATP5MF/ATP5PB/CBR4/CTPS1/DCAKD/DLAT/DLG1/ELOVL7/FASN/FBP1/FOXK1/GUCY1B1/HK1/HK2/HMGCS2/HSD17B8/MCCC2/MPP1/NME3/NT5E/NUDT5/NUP133/NUP205/NUP85/NUP98/PAPSS2/PARP1/PDK1/PDK2/PDK4/PDPR/PSEN1/SEH1L/SLC25A13/SULT1B1	44	sumer	6.58935
GO:0006401	RNA catabolic process	42/692	397/18670	1.03755e-09	3.8509e-07	3.25126e-07	AGO3/CNOT1/DCPS/FXR2/GSPT2/HNRNPD/HSPA1A/HSPA1B/PDE12/PKP1/PPP2R1A/PRKCA/PSMA8/PSMB1/PSMB7/PSMC2/PSMC6/PSMD11/PSMD2/PSMD5/PSMD9/PSME1/RBM8A/RIDA/RPL10A/RPL17/RPL18A/RPL22/RPL24/RPL30/RPL36/RPS10/RPS15A/RPS23/RPS24/SCGB1A1/SLIRP/THRAP3/UPF1/YBX1/YBX3/ZC3HAV1	42	sumer	6.48795
GO:0009259	ribonucleotide metabolic process	43/692	414/18670	1.15612e-09	3.88823e-07	3.28278e-07	ABCD1/ACAT1/ACSL1/ACSL3/ADSS2/AK4/AK5/ATP5F1A/ATP5F1B/ATP5MF/ATP5PB/CBR4/CTPS1/DCAKD/DLAT/DLG1/ELOVL7/FASN/FBP1/FOXK1/GUCY1B1/HK1/HK2/HMGCS2/HSD17B8/MCCC2/MPP1/NME3/NT5E/NUP133/NUP205/NUP85/NUP98/PAPSS2/PARP1/PDK1/PDK2/PDK4/PDPR/PSEN1/SEH1L/SLC25A13/SULT1B1	43	sumer	6.48376
GO:0009150	purine ribonucleotide metabolic process	42/692	399/18670	1.20878e-09	3.88823e-07	3.28278e-07	ABCD1/ACAT1/ACSL1/ACSL3/ADSS2/AK4/AK5/ATP5F1A/ATP5F1B/ATP5MF/ATP5PB/CBR4/DCAKD/DLAT/DLG1/ELOVL7/FASN/FBP1/FOXK1/GUCY1B1/HK1/HK2/HMGCS2/HSD17B8/MCCC2/MPP1/NME3/NT5E/NUP133/NUP205/NUP85/NUP98/PAPSS2/PARP1/PDK1/PDK2/PDK4/PDPR/PSEN1/SEH1L/SLC25A13/SULT1B1	42	sumer	6.48376
GO:0006164	purine nucleotide biosynthetic process	27/692	192/18670	2.61771e-09	7.89403e-07	6.66482e-07	ACAT1/ACSL1/ACSL3/ADSS2/AK4/AK5/ATP5F1A/ATP5F1B/ATP5MF/ATP5PB/CBR4/DCAKD/DLAT/ELOVL7/FASN/GUCA2A/GUCY1B1/HSD17B8/NME3/NOS1/PAPSS2/PARP1/PDK1/PDK2/PDK4/PDPR/SLC25A13	27	sumer	6.17621
GO:0046034	ATP metabolic process	35/692	304/18670	2.91603e-09	8.27638e-07	6.98764e-07	ABCD1/AK4/AK5/ATP5F1A/ATP5F1B/ATP5MF/ATP5PB/CLPX/FBP1/FOXK1/HK1/HK2/HSPA1A/HSPA1B/MYH3/MYH4/MYH6/MYH7/MYH8/NDUFA13/NDUFA4/NDUFA9/NIPSNAP2/NUDT5/NUP133/NUP205/NUP85/NUP98/PARP1/PDE12/PSEN1/SDHA/SEH1L/SLC25A13/UQCRQ	35	sumer	6.15567
GO:0009165	nucleotide biosynthetic process	33/692	278/18670	3.84024e-09	1.0294e-06	8.69106e-07	ACAT1/ACSL1/ACSL3/ADSS2/AK4/AK5/ATP5F1A/ATP5F1B/ATP5MF/ATP5PB/CBR4/CTPS1/DCAKD/DLAT/ELOVL7/FASN/FCSK/GUCA2A/GUCY1B1/HSD17B8/NAXE/NME3/NOS1/PAPSS2/PARP1/PDK1/PDK2/PDK4/PDPR/PNKP/PNP/SLC25A13/TK2	33	sumer	6.06093
GO:0009152	purine ribonucleotide biosynthetic process	25/692	172/18670	5.11241e-09	1.26042e-06	1.06415e-06	ACAT1/ACSL1/ACSL3/ADSS2/AK4/AK5/ATP5F1A/ATP5F1B/ATP5MF/ATP5PB/CBR4/DCAKD/DLAT/ELOVL7/FASN/GUCY1B1/HSD17B8/NME3/PAPSS2/PARP1/PDK1/PDK2/PDK4/PDPR/SLC25A13	25	sumer	5.973
GO:0009260	ribonucleotide biosynthetic process	26/692	185/18670	5.22452e-09	1.26042e-06	1.06415e-06	ACAT1/ACSL1/ACSL3/ADSS2/AK4/AK5/ATP5F1A/ATP5F1B/ATP5MF/ATP5PB/CBR4/CTPS1/DCAKD/DLAT/ELOVL7/FASN/GUCY1B1/HSD17B8/NME3/PAPSS2/PARP1/PDK1/PDK2/PDK4/PDPR/SLC25A13	26	sumer	5.973
GO:1901293	nucleoside phosphate biosynthetic process	33/692	282/18670	5.50754e-09	1.26542e-06	1.06838e-06	ACAT1/ACSL1/ACSL3/ADSS2/AK4/AK5/ATP5F1A/ATP5F1B/ATP5MF/ATP5PB/CBR4/CTPS1/DCAKD/DLAT/ELOVL7/FASN/FCSK/GUCA2A/GUCY1B1/HSD17B8/NAXE/NME3/NOS1/PAPSS2/PARP1/PDK1/PDK2/PDK4/PDPR/PNKP/PNP/SLC25A13/TK2	33	sumer	5.97127
GO:0031334	positive regulation of protein-containing complex assembly	30/692	244/18670	8.69739e-09	1.9075e-06	1.61047e-06	ARPC1B/CAND1/CARMIL1/CDH5/CORO1B/CTNNA2/CUL4B/CYFIP1/DLG1/FES/FSCN1/GMFB/GMFG/HDAC6/HSP90AA1/HSPA1A/HSPA1B/IDE/JCHAIN/NCKAP1L/PARP1/PFN2/PSMC2/PSMC6/RAC1/RAC3/RACK1/SNX9/SYK/VIL1	30	sumer	5.79305
GO:0019080	viral gene expression	26/692	191/18670	1.0322e-08	2.16537e-06	1.82819e-06	CCNT1/EIF3A/EIF3F/EIF3L/GTF2B/HPN/NELFA/NUP133/NUP205/NUP85/NUP98/POLR2H/RPL10A/RPL17/RPL18A/RPL22/RPL24/RPL30/RPL36/RPS10/RPS15A/RPS23/RPS24/SEH1L/SMARCA4/TRIM21	26	sumer	5.73798
GO:0044272	sulfur compound biosynthetic process	26/692	192/18670	1.15286e-08	2.22503e-06	1.87856e-06	ACAT1/ACSL1/ACSL3/B3GALT6/B4GALT1/B4GAT1/BHMT/BHMT2/CBR4/CHST3/DLAT/ELOVL7/ESD/FASN/GGCT/GGT2/GGT5/GSTM4/HSD17B8/OMD/PAPSS2/PDK1/PDK2/PDK4/PDPR/PRELP	26	sumer	5.72617
GO:0046390	ribose phosphate biosynthetic process	26/692	192/18670	1.15286e-08	2.22503e-06	1.87856e-06	ACAT1/ACSL1/ACSL3/ADSS2/AK4/AK5/ATP5F1A/ATP5F1B/ATP5MF/ATP5PB/CBR4/CTPS1/DCAKD/DLAT/ELOVL7/FASN/GUCY1B1/HSD17B8/NME3/PAPSS2/PARP1/PDK1/PDK2/PDK4/PDPR/SLC25A13	26	sumer	5.72617
GO:0051186	cofactor metabolic process	43/692	449/18670	1.33542e-08	2.47822e-06	2.09233e-06	ABCD1/ACAT1/ACSL1/ACSL3/AKR1C2/AKR1C3/ALDH5A1/BHMT2/CBR3/CBR4/CIAO1/COQ3/CYB5A/DCAKD/DLAT/ELOVL7/ETHE1/FASN/GGCT/GGT2/GGT5/GPX1/GSTA5/GSTM4/HDAC6/HMGCS2/HMOX2/HSD17B8/HSP90AA1/ISCA2/MCCC1/MCCC2/MPO/NAXE/NDUFA9/PDK1/PDK2/PDK4/PDPR/PNPO/RAC1/RAC2/VNN1	43	sumer	5.67937
GO:0044282	small molecule catabolic process	41/692	445/18670	8.53673e-08	1.52555e-05	1.288e-05	ABCD1/ABHD10/ACADM/ACADVL/ACAT1/ADIPOQ/AKR1C3/ALDH5A1/ALDH7A1/AMDHD2/ARG1/ATP2B4/BCAT2/CBR3/CD44/CRAT/ECH1/ECI2/ESD/ETFDH/FOXK1/GALE/GALM/GLUD1/GPT/HEXA/HK1/HK2/IMPA1/IVD/MCCC1/MCCC2/NOS1/NT5C/NT5E/NUDT5/PADI4/PNP/PON3/RIDA/SULT1B1	41	sumer	4.89008
GO:0043254	regulation of protein-containing complex assembly	40/692	429/18670	8.93064e-08	1.53894e-05	1.29931e-05	ARPC1B/CAND1/CARMIL1/CDH5/CORO1B/CTNNA2/CTNNBIP1/CUL4B/CYFIP1/DLG1/EPS8/FES/FSCN1/GMFB/GMFG/HCLS1/HDAC6/HMGB1/HSP90AA1/HSPA1A/HSPA1B/IDE/JCHAIN/NAPB/NCKAP1L/PARP1/PFN2/PRUNE1/PSMC2/PSMC6/RAC1/RAC3/RACK1/SAR1B/SNX9/STX1A/SYK/TMOD2/VIL1/VPS18	40	sumer	4.88629
GO:0006457	protein folding	27/692	227/18670	9.63876e-08	1.60369e-05	1.35397e-05	AIP/BAG2/CCT2/CCT6A/CCT6B/CLPX/DNAJA1/DNAJB11/DNAJB12/DNAJC10/DNAJC3/EMC1/EMC2/GNAZ/GRN/HSP90AA1/HSPA13/HSPA1A/HSPA1B/HSPH1/LMAN1/PDIA3/PDIA4/PDIA6/PFDN4/PPIB/TBCA	27	sumer	4.86839
GO:0033866	nucleoside bisphosphate biosynthetic process	14/692	68/18670	1.56363e-07	2.28203e-05	1.92669e-05	ACAT1/ACSL1/ACSL3/CBR4/DCAKD/DLAT/ELOVL7/FASN/HSD17B8/PAPSS2/PDK1/PDK2/PDK4/PDPR	14	sumer	4.71519
GO:0034030	ribonucleoside bisphosphate biosynthetic process	14/692	68/18670	1.56363e-07	2.28203e-05	1.92669e-05	ACAT1/ACSL1/ACSL3/CBR4/DCAKD/DLAT/ELOVL7/FASN/HSD17B8/PAPSS2/PDK1/PDK2/PDK4/PDPR	14	sumer	4.71519
GO:0034033	purine nucleoside bisphosphate biosynthetic process	14/692	68/18670	1.56363e-07	2.28203e-05	1.92669e-05	ACAT1/ACSL1/ACSL3/CBR4/DCAKD/DLAT/ELOVL7/FASN/HSD17B8/PAPSS2/PDK1/PDK2/PDK4/PDPR	14	sumer	4.71519
GO:1901605	alpha-amino acid metabolic process	25/692	204/18670	1.60807e-07	2.28203e-05	1.92669e-05	ACAT1/ADSS2/AGMAT/ALDH5A1/ALDH7A1/ARG1/ART4/ASL/ATP2B4/BCAT2/BHMT/BHMT2/CPS1/CTPS1/DGLUCY/GLUD1/GPT/IVD/MCCC1/MCCC2/NOS1/PADI4/PLOD1/RIDA/SEPHS2	25	sumer	4.71519
GO:1902905	positive regulation of supramolecular fiber organization	25/692	204/18670	1.60807e-07	2.28203e-05	1.92669e-05	ARHGEF10L/ARPC1B/CARMIL1/CORO1B/CTNNA2/CYFIP1/DLG1/DSTN/FES/GMFB/GMFG/GPX1/HSPA1A/HSPA1B/NCKAP1L/NRP1/PFN2/PSEN1/RAC1/RAC3/SDC4/SNX9/SWAP70/SYNPO2/VIL1	25	sumer	4.71519
GO:0019083	viral transcription	23/692	177/18670	1.72704e-07	2.38085e-05	2.01012e-05	CCNT1/GTF2B/HPN/NELFA/NUP133/NUP205/NUP85/NUP98/POLR2H/RPL10A/RPL17/RPL18A/RPL22/RPL24/RPL30/RPL36/RPS10/RPS15A/RPS23/RPS24/SEH1L/SMARCA4/TRIM21	23	sumer	4.69678
GO:0006525	arginine metabolic process	8/692	20/18670	2.9022e-07	3.88975e-05	3.28407e-05	AGMAT/ARG1/ART4/ASL/ATP2B4/CPS1/NOS1/PADI4	8	sumer	4.48359
GO:0061013	regulation of mRNA catabolic process	24/692	199/18670	3.82358e-07	4.98615e-05	4.20974e-05	CNOT1/FXR2/HNRNPD/HSPA1A/PDE12/PKP1/PRKCA/PSMA8/PSMB1/PSMB7/PSMC2/PSMC6/PSMD11/PSMD2/PSMD5/PSMD9/PSME1/RIDA/SCGB1A1/THRAP3/UPF1/YBX1/YBX3/ZC3HAV1	24	sumer	4.37574
GO:0035384	thioester biosynthetic process	12/692	54/18670	5.02051e-07	6.21127e-05	5.24409e-05	ACAT1/ACSL1/ACSL3/CBR4/DLAT/ELOVL7/FASN/HSD17B8/PDK1/PDK2/PDK4/PDPR	12	sumer	4.28033
GO:0071616	acyl-CoA biosynthetic process	12/692	54/18670	5.02051e-07	6.21127e-05	5.24409e-05	ACAT1/ACSL1/ACSL3/CBR4/DLAT/ELOVL7/FASN/HSD17B8/PDK1/PDK2/PDK4/PDPR	12	sumer	4.28033
GO:0043687	post-translational protein modification	34/692	361/18670	6.59848e-07	7.95942e-05	6.72003e-05	APOB/CALU/CAND1/CHGB/COPS2/CUL2/CUL4B/DCAF7/DDA1/DNAJC3/FBXL18/FBXO6/FBXO7/FN1/GOLM1/GPS1/IGFBP1/PDIA6/PSMA8/PSMB1/PSMB7/PSMC2/PSMC6/PSMD11/PSMD2/PSMD5/PSMD9/PSME1/QSOX1/RAB8A/RABGGTB/SCG2/TNC/UCHL3	34	sumer	4.17263
GO:0009308	amine metabolic process	19/692	138/18670	8.26918e-07	9.73142e-05	8.21611e-05	AGMAT/ALDH7A1/AOC1/ATP2B4/BHMT/CHDH/DBH/DMGDH/PSMA8/PSMB1/PSMB7/PSMC2/PSMC6/PSMD11/PSMD2/PSMD5/PSMD9/PSME1/SULT1B1	19	sumer	4.08533
GO:0010565	regulation of cellular ketone metabolic process	22/692	180/18670	9.24806e-07	0.000106243	8.96992e-05	ABCD1/ACADVL/ADIPOQ/AKR1C3/ATP2B4/BHMT/COQ3/FABP3/PDK1/PDK2/PDK4/PDPR/PSMA8/PSMB1/PSMB7/PSMC2/PSMC6/PSMD11/PSMD2/PSMD5/PSMD9/PSME1	22	sumer	4.04721
GO:0044106	cellular amine metabolic process	18/692	129/18670	1.31457e-06	0.000147507	0.000124538	AGMAT/ALDH7A1/ATP2B4/BHMT/CHDH/DBH/DMGDH/PSMA8/PSMB1/PSMB7/PSMC2/PSMC6/PSMD11/PSMD2/PSMD5/PSMD9/PSME1/SULT1B1	18	sumer	3.9047
GO:0042180	cellular ketone metabolic process	26/692	246/18670	1.64719e-06	0.000180629	0.000152503	ABCD1/ACADVL/ADIPOQ/AKR1C2/AKR1C3/ATP2B4/BHMT/CBR3/CBR4/COQ3/FABP3/NDUFA9/PDK1/PDK2/PDK4/PDPR/PSMA8/PSMB1/PSMB7/PSMC2/PSMC6/PSMD11/PSMD2/PSMD5/PSMD9/PSME1	26	sumer	3.81672
GO:0062012	regulation of small molecule metabolic process	37/692	429/18670	1.80822e-06	0.000193881	0.000163691	ABCD1/ACADVL/ADIPOQ/AK4/AKR1C3/APOB/ATP2B4/BHMT/COQ3/FABP3/FASN/FBP1/FOXK1/GUCA2A/NLN/NOS1/NUP133/NUP205/NUP85/NUP98/PARP1/PDK1/PDK2/PDK4/PDPR/PSEN1/PSMA8/PSMB1/PSMB7/PSMC2/PSMC6/PSMD11/PSMD2/PSMD5/PSMD9/PSME1/SEH1L	37	sumer	3.78597
GO:0032273	positive regulation of protein polymerization	18/692	134/18670	2.30219e-06	0.000241479	0.000203878	ARPC1B/CARMIL1/CORO1B/CTNNA2/CYFIP1/DLG1/FES/GMFB/GMFG/HSP90AA1/HSPA1A/HSPA1B/NCKAP1L/PFN2/RAC1/RAC3/SNX9/VIL1	18	sumer	3.69063
GO:0002474	antigen processing and presentation of peptide antigen via MHC class I	15/692	96/18670	2.36933e-06	0.00024226	0.000204537	IDE/IFI30/ITGAV/PDIA3/PSMA8/PSMB1/PSMB7/PSMC2/PSMC6/PSMD11/PSMD2/PSMD5/PSMD9/PSME1/SAR1B	15	sumer	3.68923
GO:0006521	regulation of cellular amino acid metabolic process	12/692	62/18670	2.41005e-06	0.00024226	0.000204537	ATP2B4/BHMT/PSMA8/PSMB1/PSMB7/PSMC2/PSMC6/PSMD11/PSMD2/PSMD5/PSMD9/PSME1	12	sumer	3.68923
GO:0006605	protein targeting	37/692	435/18670	2.50628e-06	0.000246792	0.000208363	AIP/AKAP12/CRAT/ECH1/ECI2/FBXO7/GOSR2/HSP90AA1/HSPA4/IDE/LMAN1/LTBP2/M6PR/NDUFA13/PMPCA/PMPCB/RAB27A/RAB7A/RAC2/RPL10A/RPL17/RPL18A/RPL22/RPL24/RPL30/RPL36/RPS10/RPS15A/RPS23/RPS24/SAMM50/SSR1/TIMM10/TIMM44/USP9X/VPS37B/VTI1B	37	sumer	3.68118
GO:0043488	regulation of mRNA stability	21/692	177/18670	2.64017e-06	0.000254776	0.000215104	FXR2/HNRNPD/HSPA1A/PDE12/PRKCA/PSMA8/PSMB1/PSMB7/PSMC2/PSMC6/PSMD11/PSMD2/PSMD5/PSMD9/PSME1/RIDA/SCGB1A1/THRAP3/UPF1/YBX1/YBX3	21	sumer	3.66735
GO:1902903	regulation of supramolecular fiber organization	32/692	353/18670	3.18258e-06	0.000301097	0.000254212	ARHGAP35/ARHGEF10L/ARPC1B/CARMIL1/CDH5/CORO1B/CTNNA2/CYFIP1/DLG1/DSTN/EPS8/FES/GMFB/GMFG/GPX1/HCLS1/HDAC6/HSPA1A/HSPA1B/NCKAP1L/NRP1/PFN2/PRUNE1/PSEN1/RAC1/RAC3/SDC4/SNX9/SWAP70/SYNPO2/TMOD2/VIL1	32
GO:0051495	positive regulation of cytoskeleton organization	24/692	226/18670	3.7837e-06	0.000351084	0.000296416	ARHGEF10L/ARPC1B/CARMIL1/CORO1B/CTNNA2/CYFIP1/DLG1/DSTN/FES/GMFB/GMFG/HCLS1/HSPA1A/HSPA1B/NCKAP1L/NRP1/PFN2/RAC1/RAC3/SDC4/SNX9/SWAP70/SYNPO2/VIL1	24
GO:0016054	organic acid catabolic process	27/692	275/18670	4.28229e-06	0.000367665	0.000310414	ABCD1/ABHD10/ACADM/ACADVL/ACAT1/ADIPOQ/ALDH5A1/ALDH7A1/AMDHD2/ARG1/ATP2B4/BCAT2/CD44/CRAT/ECH1/ECI2/ETFDH/GLUD1/GPT/HEXA/IVD/MCCC1/MCCC2/NOS1/PADI4/PON3/RIDA	27
GO:0046395	carboxylic acid catabolic process	27/692	275/18670	4.28229e-06	0.000367665	0.000310414	ABCD1/ABHD10/ACADM/ACADVL/ACAT1/ADIPOQ/ALDH5A1/ALDH7A1/AMDHD2/ARG1/ATP2B4/BCAT2/CD44/CRAT/ECH1/ECI2/ETFDH/GLUD1/GPT/HEXA/IVD/MCCC1/MCCC2/NOS1/PADI4/PON3/RIDA	27
GO:0033865	nucleoside bisphosphate metabolic process	18/692	140/18670	4.3434e-06	0.000367665	0.000310414	ABCD1/ACAT1/ACSL1/ACSL3/CBR4/DCAKD/DLAT/ELOVL7/FASN/HMGCS2/HSD17B8/MCCC2/PAPSS2/PDK1/PDK2/PDK4/PDPR/SULT1B1	18
GO:0033875	ribonucleoside bisphosphate metabolic process	18/692	140/18670	4.3434e-06	0.000367665	0.000310414	ABCD1/ACAT1/ACSL1/ACSL3/CBR4/DCAKD/DLAT/ELOVL7/FASN/HMGCS2/HSD17B8/MCCC2/PAPSS2/PDK1/PDK2/PDK4/PDPR/SULT1B1	18
GO:0034032	purine nucleoside bisphosphate metabolic process	18/692	140/18670	4.3434e-06	0.000367665	0.000310414	ABCD1/ACAT1/ACSL1/ACSL3/CBR4/DCAKD/DLAT/ELOVL7/FASN/HMGCS2/HSD17B8/MCCC2/PAPSS2/PDK1/PDK2/PDK4/PDPR/SULT1B1	18
GO:0043487	regulation of RNA stability	21/692	183/18670	4.50352e-06	0.000374647	0.000316309	FXR2/HNRNPD/HSPA1A/PDE12/PRKCA/PSMA8/PSMB1/PSMB7/PSMC2/PSMC6/PSMD11/PSMD2/PSMD5/PSMD9/PSME1/RIDA/SCGB1A1/THRAP3/UPF1/YBX1/YBX3	21
hsa05014	Amyotrophic lateral sclerosis	40/403	364/8100	1.5829e-06	0.00047487	0.000408222	ATP5F1A/ATP5F1B/ATP5PB/GPX1/GPX2/HDAC6/KIF5C/MAP2K3/NDUFA13/NDUFA4/NDUFA9/NEFL/NOS1/NUP133/NUP205/NUP85/NUP98/PFN2/PSMA8/PSMB1/PSMB7/PSMC2/PSMC6/PSMD11/PSMD2/PSMD9/RAB8A/RAC1/SDHA/SDHB/SEH1L/SLC1A2/SQSTM1/SRSF7/TBK1/TUBB1/TUBB3/TUBB8/UBQLN1/UQCRQ	40
GO:0042590	antigen processing and presentation of exogenous peptide antigen via MHC class I	13/692	79/18670	6.16517e-06	0.000504186	0.000425677	IFI30/ITGAV/PDIA3/PSMA8/PSMB1/PSMB7/PSMC2/PSMC6/PSMD11/PSMD2/PSMD5/PSMD9/PSME1	13
GO:0007015	actin filament organization	34/692	400/18670	6.47662e-06	0.000520828	0.000439728	ARHGAP17/ARHGAP35/ARHGEF10L/ARPC1B/BCAR1/CARMIL1/CD2AP/CGNL1/CORO1B/CTNNA2/CYFIP1/DLG1/DPYSL3/DSTN/EPS8/FSCN1/GMFB/GMFG/HCLS1/MICAL1/NCKAP1L/NEBL/NRP1/PDLIM3/PFN2/RAC1/RAC2/RAC3/SDC4/SNX9/SWAP70/SYNPO2/TMOD2/VIL1	34
GO:0032271	regulation of protein polymerization	23/692	218/18670	6.68825e-06	0.00052903	0.000446653	ARPC1B/CARMIL1/CDH5/CORO1B/CTNNA2/CYFIP1/DLG1/EPS8/FES/GMFB/GMFG/HCLS1/HSP90AA1/HSPA1A/HSPA1B/NCKAP1L/PFN2/PRUNE1/RAC1/RAC3/SNX9/TMOD2/VIL1	23
GO:0006575	cellular modified amino acid metabolic process	21/692	188/18670	6.89292e-06	0.000536425	0.000452896	ABHD12/ACADM/ALDH5A1/ALDH7A1/BHMT/BHMT2/CHDH/CRAT/DMGDH/ETHE1/GGCT/GGT2/GGT5/GPX1/GSTA5/GSTM4/HPN/LPCAT3/PLOD1/SULT1B1/VNN1	21
GO:0051258	protein polymerization	27/692	283/18670	7.30251e-06	0.000559279	0.000472192	ARPC1B/CARMIL1/CDH5/CHMP2A/CKAP5/CORO1B/CTNNA2/CYFIP1/DLG1/EPS8/FES/GMFB/GMFG/HCLS1/HSP90AA1/HSPA1A/HSPA1B/MX1/NCKAP1L/NEFL/PFN2/PRUNE1/RAC1/RAC3/SNX9/TMOD2/VIL1	27
GO:0034976	response to endoplasmic reticulum stress	27/692	285/18670	8.31362e-06	0.000626769	0.000529173	ACADVL/ATP2A1/CXXC1/DNAJB11/DNAJB12/DNAJC10/DNAJC3/EEF2/ERLEC1/FBXO6/GOSR2/HSPA13/HSPA1A/IGFBP1/ITPR1/NIBAN1/PDIA3/PDIA4/PDIA6/PSMC6/RACK1/SEL1L/SSR1/THBS4/UBQLN1/UFL1/USP14	27
GO:0048524	positive regulation of viral process	15/692	107/18670	9.36845e-06	0.000695427	0.00058714	CCNT1/CHMP2A/GTF2B/HPN/IGF2R/LGALS9/NELFA/PDE12/POLR2H/PPIB/RAB7A/SMARCA4/SMC3/TRIM21/VPS37B	15
GO:0006732	coenzyme metabolic process	25/692	255/18670	9.8796e-06	0.000722258	0.000609793	ABCD1/ACAT1/ACSL1/ACSL3/BHMT2/CBR3/CBR4/COQ3/CYB5A/DCAKD/DLAT/ELOVL7/FASN/HMGCS2/HSD17B8/MCCC1/MCCC2/NAXE/NDUFA9/PDK1/PDK2/PDK4/PDPR/PNPO/VNN1	25
GO:0031146	SCF-dependent proteasomal ubiquitin-dependent protein catabolic process	14/692	95/18670	1.03002e-05	0.000741771	0.000626268	CUL2/CUL4B/FBXL18/FBXO6/PSMA8/PSMB1/PSMB7/PSMC2/PSMC6/PSMD11/PSMD2/PSMD5/PSMD9/PSME1	14
GO:0022604	regulation of cell morphogenesis	38/692	484/18670	1.18591e-05	0.000841475	0.000710446	ADGRB3/ARHGAP35/CARMIL1/CD44/CFAP410/CORO1B/CRKL/CUX1/CYFIP1/DLG1/EPS8/FBLN1/FES/FMNL2/FN1/GBP1/GOLGA4/HPN/ITGA7/MAP2K1/MYCBP2/MYH14/NEDD4L/NEFL/NRP1/OLFM4/PHIP/PLXNA1/POSTN/PSEN1/PTK2/RAC1/RAC3/S100B/SARM1/SIN3A/SLC9A3R1/VIL1	38
GO:1902036	regulation of hematopoietic stem cell differentiation	12/692	72/18670	1.22161e-05	0.000854239	0.000721223	CDK6/PSMA8/PSMB1/PSMB7/PSMC2/PSMC6/PSMD11/PSMD2/PSMD5/PSMD9/PSME1/YAP1	12
GO:0009064	glutamine family amino acid metabolic process	12/692	74/18670	1.63074e-05	0.00111961	0.000945274	AGMAT/ALDH5A1/ARG1/ART4/ASL/ATP2B4/CPS1/CTPS1/DGLUCY/GLUD1/NOS1/PADI4	12
GO:0035966	response to topologically incorrect protein	21/692	199/18670	1.66073e-05	0.00111961	0.000945274	ACADVL/COMP/CXXC1/DNAJA1/DNAJB11/DNAJB12/DNAJC3/FBXO6/GOSR2/HDAC6/HSP90AA1/HSPA13/HSPA1A/HSPA1B/HSPA4/HSPH1/IGFBP1/PDIA6/RACK1/SSR1/THBS4	21
GO:1901570	fatty acid derivative biosynthetic process	14/692	99/18670	1.67072e-05	0.00111961	0.000945274	ACAT1/ACSL1/ACSL3/AKR1C3/CBR4/ELOVL7/FASN/GGT2/GGT5/HMGCS2/HSD17B8/PTGDS/SYK/TBXAS1	14
GO:0006631	fatty acid metabolic process	32/692	383/18670	1.70415e-05	0.00112637	0.00095098	ABCD1/ACADM/ACADVL/ACAT1/ACSL1/ACSL3/ADIPOQ/AKR1C2/AKR1C3/ALDH5A1/ANGPTL3/CBR4/CRAT/ECH1/ECI2/ELOVL7/ETFDH/FABP3/FASN/GGT5/GPX1/GSTM4/HSD17B8/IVD/PDK1/PDK2/PDK4/PDPR/PON3/PTGDS/SLC27A3/TBXAS1	32
GO:1900024	regulation of substrate adhesion-dependent cell spreading	10/692	52/18670	1.77197e-05	0.00115537	0.000975466	CARMIL1/CRKL/FBLN1/GBP1/NRP1/OLFM4/POSTN/PTK2/RAC1/RAC3	10
GO:0002479	antigen processing and presentation of exogenous peptide antigen via MHC class I, TAP-dependent	12/692	75/18670	1.87682e-05	0.00119201	0.0010064	ITGAV/PDIA3/PSMA8/PSMB1/PSMB7/PSMC2/PSMC6/PSMD11/PSMD2/PSMD5/PSMD9/PSME1	12
GO:0002181	cytoplasmic translation	14/692	100/18670	1.87757e-05	0.00119201	0.0010064	EEF2/EIF3A/EIF3F/EIF3L/EIF5/GSPT2/RPL10A/RPL17/RPL18A/RPL24/RPL30/RPL36/RPS23/YBX3	14
GO:0062197	cellular response to chemical stress	30/692	350/18670	1.91411e-05	0.00119942	0.00101266	ABCD1/AKR1C3/ARG1/DNAJA1/EFHD1/FBLN5/FBXO7/GPX1/GPX2/GUCY1B1/HDAC6/HNRNPD/HSPA1A/HSPA1B/LANCL1/MEAK7/MMP9/MPO/OXSR1/PARP1/PDCD10/PDK1/PDK2/PSAP/RACK1/SIN3A/SIRPA/UBQLN1/VNN1/YBX3	30
GO:0006891	intra-Golgi vesicle-mediated transport	8/692	33/18670	2.08607e-05	0.00129042	0.00108948	COG2/COPB1/COPG1/COPG2/CUX1/GOLGA5/GOSR2/VTI1B	8
GO:0006577	amino-acid betaine metabolic process	6/692	17/18670	2.21225e-05	0.00135115	0.00114076	ACADM/ALDH7A1/BHMT/CHDH/CRAT/DMGDH	6
GO:1900542	regulation of purine nucleotide metabolic process	15/692	115/18670	2.26468e-05	0.00136588	0.0011532	AK4/FBP1/GUCA2A/NOS1/NUP133/NUP205/NUP85/NUP98/PARP1/PDK1/PDK2/PDK4/PDPR/PSEN1/SEH1L	15
GO:0009896	positive regulation of catabolic process	34/692	425/18670	2.3153e-05	0.00137917	0.00116442	ABCD1/ANGPTL3/BAG2/CALCOCO2/CNOT1/CUL4B/DDA1/DTX3L/FBXO7/HDAC6/HK2/HMGB1/HNRNPD/HSP90AA1/HSPA1A/HSPA1B/IDE/NDUFA13/NEDD4L/NRDC/PSEN1/PSMC2/PTK2/RAB3GAP1/RAB7A/RACK1/RIDA/SNX9/TBK1/TRIM21/TSC2/UBQLN1/UPF1/ZC3HAV1	34
GO:0006140	regulation of nucleotide metabolic process	15/692	117/18670	2.78632e-05	0.00163951	0.00138422	AK4/FBP1/GUCA2A/NOS1/NUP133/NUP205/NUP85/NUP98/PARP1/PDK1/PDK2/PDK4/PDPR/PSEN1/SEH1L	15
GO:0009108	coenzyme biosynthetic process	17/692	146/18670	2.97448e-05	0.00172914	0.00145989	ACAT1/ACSL1/ACSL3/CBR4/COQ3/DCAKD/DLAT/ELOVL7/FASN/HSD17B8/NAXE/NDUFA9/PDK1/PDK2/PDK4/PDPR/PNPO	17
GO:0006986	response to unfolded protein	19/692	176/18670	3.02202e-05	0.00173586	0.00146557	ACADVL/COMP/CXXC1/DNAJA1/DNAJB11/DNAJC3/FBXO6/GOSR2/HSP90AA1/HSPA13/HSPA1A/HSPA1B/HSPA4/HSPH1/IGFBP1/PDIA6/RACK1/SSR1/THBS4	19
GO:0006637	acyl-CoA metabolic process	14/692	105/18670	3.28777e-05	0.00184459	0.00155737	ABCD1/ACAT1/ACSL1/ACSL3/CBR4/DLAT/ELOVL7/FASN/HMGCS2/HSD17B8/PDK1/PDK2/PDK4/PDPR	14
GO:0035383	thioester metabolic process	14/692	105/18670	3.28777e-05	0.00184459	0.00155737	ABCD1/ACAT1/ACSL1/ACSL3/CBR4/DLAT/ELOVL7/FASN/HMGCS2/HSD17B8/PDK1/PDK2/PDK4/PDPR	14
GO:0008154	actin polymerization or depolymerization	21/692	209/18670	3.472e-05	0.00192556	0.00162573	ARHGAP35/ARPC1B/CARMIL1/CORO1B/CTNNA2/CYFIP1/DLG1/DSTN/EPS8/GMFB/GMFG/HCLS1/MICAL1/NCKAP1L/PFN2/RAC1/RAC3/SNX9/SWAP70/TMOD2/VIL1	21
GO:0000184	nuclear-transcribed mRNA catabolic process, nonsense-mediated decay	15/692	120/18670	3.76749e-05	0.0020657	0.00174404	GSPT2/PPP2R1A/RBM8A/RPL10A/RPL17/RPL18A/RPL22/RPL24/RPL30/RPL36/RPS10/RPS15A/RPS23/RPS24/UPF1	15
GO:0008064	regulation of actin polymerization or depolymerization	19/692	179/18670	3.82311e-05	0.00207264	0.0017499	ARHGAP35/ARPC1B/CARMIL1/CORO1B/CTNNA2/CYFIP1/DLG1/DSTN/EPS8/GMFB/GMFG/HCLS1/NCKAP1L/PFN2/RAC3/SNX9/SWAP70/TMOD2/VIL1	19
GO:0030832	regulation of actin filament length	19/692	180/18670	4.12935e-05	0.00217057	0.00183259	ARHGAP35/ARPC1B/CARMIL1/CORO1B/CTNNA2/CYFIP1/DLG1/DSTN/EPS8/GMFB/GMFG/HCLS1/NCKAP1L/PFN2/RAC3/SNX9/SWAP70/TMOD2/VIL1	19
GO:0031145	anaphase-promoting complex-dependent catabolic process	12/692	81/18670	4.14876e-05	0.00217057	0.00183259	BUB3/CDC23/PSMA8/PSMB1/PSMB7/PSMC2/PSMC6/PSMD11/PSMD2/PSMD5/PSMD9/PSME1	12
GO:0033238	regulation of cellular amine metabolic process	12/692	81/18670	4.14876e-05	0.00217057	0.00183259	ATP2B4/BHMT/PSMA8/PSMB1/PSMB7/PSMC2/PSMC6/PSMD11/PSMD2/PSMD5/PSMD9/PSME1	12
GO:0008360	regulation of cell shape	17/692	150/18670	4.21639e-05	0.00217057	0.00183259	ARHGAP35/CFAP410/CYFIP1/DLG1/EPS8/FES/FMNL2/FN1/HPN/ITGA7/MYH14/PHIP/PLXNA1/PTK2/S100B/SLC9A3R1/VIL1	17
GO:0110053	regulation of actin filament organization	24/692	261/18670	4.22868e-05	0.00217057	0.00183259	ARHGAP35/ARHGEF10L/ARPC1B/CARMIL1/CORO1B/CTNNA2/CYFIP1/DLG1/DSTN/EPS8/GMFB/GMFG/HCLS1/NCKAP1L/NRP1/PFN2/RAC1/RAC3/SDC4/SNX9/SWAP70/SYNPO2/TMOD2/VIL1	24
GO:0051196	regulation of coenzyme metabolic process	5/692	12/18670	4.39564e-05	0.00223252	0.00188489	COQ3/PDK1/PDK2/PDK4/PDPR	5
GO:0010498	proteasomal protein catabolic process	36/692	477/18670	4.60952e-05	0.00231676	0.00195601	BAG2/BUB3/CD2AP/CDC23/CUL2/CUL4B/DDA1/DNAJB12/DNAJC10/ERLEC1/FBXL18/FBXO6/GPX1/HECTD3/HSPA13/HSPA1A/HSPA1B/NEDD4L/PRPF19/PSEN1/PSMA8/PSMB1/PSMB7/PSMC2/PSMC6/PSMD11/PSMD2/PSMD5/PSMD9/PSME1/RACK1/SCO1/SEL1L/UBQLN1/UFL1/USP14	36
GO:1901568	fatty acid derivative metabolic process	18/692	167/18670	4.95895e-05	0.00246669	0.0020826	ABCD1/ACAT1/ACSL1/ACSL3/AKR1C2/AKR1C3/CBR4/ELOVL7/FASN/GGT2/GGT5/GPX1/HMGCS2/HSD17B8/PON3/PTGDS/SYK/TBXAS1	18
GO:0051193	regulation of cofactor metabolic process	8/692	37/18670	5.08832e-05	0.00250522	0.00211512	COQ3/HDAC6/PDK1/PDK2/PDK4/PDPR/RAC1/RAC2	8
GO:0050900	leukocyte migration	37/692	499/18670	5.2672e-05	0.00256233	0.00216334	APOB/ATP1B3/B4GALT1/CD44/CD58/CD9/COL1A2/CRKL/DBH/DOCK8/EPS8/FN1/GLG1/HMGB1/IGHM/ITGAL/ITGAV/JCHAIN/LGALS9/MADCAM1/MPP1/MST1L/NBL1/NCKAP1L/NUP85/OXSR1/P2RX4/PRTN3/RAC1/RAC2/SCG2/SDC4/SIRPA/SWAP70/SYK/THBS4/VAV1	37
GO:0060218	hematopoietic stem cell differentiation	12/692	83/18670	5.31053e-05	0.00256233	0.00216334	CDK6/PSMA8/PSMB1/PSMB7/PSMC2/PSMC6/PSMD11/PSMD2/PSMD5/PSMD9/PSME1/YAP1	12
GO:0006406	mRNA export from nucleus	14/692	111/18670	6.14162e-05	0.00290522	0.00245284	AGFG1/EIF5A/NUP133/NUP205/NUP85/NUP98/RBM8A/SEH1L/SRSF4/SRSF7/SRSF9/THOC5/THOC6/UPF1	14
GO:0071427	mRNA-containing ribonucleoprotein complex export from nucleus	14/692	111/18670	6.14162e-05	0.00290522	0.00245284	AGFG1/EIF5A/NUP133/NUP205/NUP85/NUP98/RBM8A/SEH1L/SRSF4/SRSF7/SRSF9/THOC5/THOC6/UPF1	14
GO:0006084	acetyl-CoA metabolic process	8/692	38/18670	6.2377e-05	0.00291996	0.00246529	ACAT1/DLAT/FASN/HMGCS2/PDK1/PDK2/PDK4/PDPR	8
GO:0034599	cellular response to oxidative stress	26/692	302/18670	6.2938e-05	0.00291996	0.00246529	ABCD1/AKR1C3/ARG1/FBLN5/FBXO7/GPX1/GPX2/GUCY1B1/HDAC6/HNRNPD/HSPA1A/HSPA1B/LANCL1/MEAK7/MMP9/MPO/PARP1/PDCD10/PDK1/PDK2/PSAP/RACK1/SIN3A/SIRPA/UBQLN1/VNN1	26
GO:1901532	regulation of hematopoietic progenitor cell differentiation	12/692	85/18670	6.74339e-05	0.00309875	0.00261623	CDK6/PSMA8/PSMB1/PSMB7/PSMC2/PSMC6/PSMD11/PSMD2/PSMD5/PSMD9/PSME1/YAP1	12
GO:0070585	protein localization to mitochondrion	16/692	141/18670	6.92658e-05	0.0031529	0.00266195	AIP/DNAJA1/FBXO7/HK1/HK2/HSP90AA1/HSPA4/LMAN1/MARCHF5/NDUFA13/PMPCA/PMPCB/RAC2/SAMM50/TIMM10/TIMM44	16
GO:0030838	positive regulation of actin filament polymerization	13/692	99/18670	7.32828e-05	0.00328002	0.00276928	ARPC1B/CARMIL1/CORO1B/CTNNA2/CYFIP1/DLG1/GMFB/GMFG/NCKAP1L/PFN2/RAC3/SNX9/VIL1	13
GO:0008380	RNA splicing	35/692	469/18670	7.34181e-05	0.00328002	0.00276928	BUD31/CLNS1A/CSTF1/CTNNBL1/DCPS/DDX17/DDX41/DDX46/HNRNPD/HNRNPH1/HNRNPH2/HSPA1A/KHDRBS1/KHDRBS2/NUP98/POLR2H/PPP2R1A/PRMT5/PRPF19/RALY/RBM3/RBM8A/RTCB/SART3/SF1/SF3B2/SRRT/SRSF4/SRSF7/SRSF9/THOC5/THOC6/THRAP3/USP39/YBX1	35
GO:0006979	response to oxidative stress	34/692	451/18670	7.61095e-05	0.00336907	0.00284446	ABCD1/ADIPOQ/AKR1C3/ARG1/EEF2/ETFDH/FBLN5/FBXO7/GPX1/GPX2/GUCY1B1/HDAC6/HMOX2/HNRNPD/HSPA1A/HSPA1B/LANCL1/MEAK7/MMP9/MPO/OXSR1/PARP1/PDCD10/PDK1/PDK2/PNKP/PSAP/PSEN1/RACK1/SCGB1A1/SIN3A/SIRPA/UBQLN1/VNN1	34
hsa04512	ECM-receptor interaction	15/403	88/8100	2.45794e-05	0.00337126	0.0028981	CD44/COL1A2/COL6A1/COL6A6/COMP/FN1/FREM2/ITGA7/ITGAV/LAMA5/SDC4/THBS2/THBS3/THBS4/TNC	15
hsa05020	Prion disease	30/403	273/8100	3.37126e-05	0.00337126	0.0028981	ATP5F1A/ATP5F1B/ATP5PB/C1QB/HSPA1A/HSPA1B/ITPR1/ITPR2/KIF5C/NCAM2/NDUFA13/NDUFA4/NDUFA9/PSMA8/PSMB1/PSMB7/PSMC2/PSMC6/PSMD11/PSMD2/PSMD9/RAC1/RAC2/SDHA/SDHB/SLC25A4/TUBB1/TUBB3/TUBB8/UQCRQ	30
GO:0048002	antigen processing and presentation of peptide antigen	19/692	189/18670	8.03138e-05	0.00352285	0.0029743	AP1B1/DYNC1LI1/IDE/IFI30/ITGAV/KIF2A/PDIA3/PSMA8/PSMB1/PSMB7/PSMC2/PSMC6/PSMD11/PSMD2/PSMD5/PSMD9/PSME1/RAB7A/SAR1B	19
GO:0034446	substrate adhesion-dependent cell spreading	13/692	100/18670	8.14275e-05	0.00353953	0.00298838	CARMIL1/CRKL/FBLN1/FN1/GBP1/ITGAV/LAMA5/NRP1/OLFM4/POSTN/PTK2/RAC1/RAC3	13
GO:0000377	RNA splicing, via transesterification reactions with bulged adenosine as nucleophile	30/692	379/18670	8.38011e-05	0.00357823	0.00302106	BUD31/CLNS1A/CSTF1/CTNNBL1/DCPS/DDX17/DDX41/DDX46/HNRNPD/HNRNPH1/HNRNPH2/KHDRBS1/KHDRBS2/NUP98/POLR2H/PRMT5/PRPF19/RALY/RBM3/RBM8A/SART3/SF1/SF3B2/SRRT/SRSF4/SRSF7/SRSF9/THRAP3/USP39/YBX1	30
GO:0000398	mRNA splicing, via spliceosome	30/692	379/18670	8.38011e-05	0.00357823	0.00302106	BUD31/CLNS1A/CSTF1/CTNNBL1/DCPS/DDX17/DDX41/DDX46/HNRNPD/HNRNPH1/HNRNPH2/KHDRBS1/KHDRBS2/NUP98/POLR2H/PRMT5/PRPF19/RALY/RBM3/RBM8A/SART3/SF1/SF3B2/SRRT/SRSF4/SRSF7/SRSF9/THRAP3/USP39/YBX1	30
GO:0032956	regulation of actin cytoskeleton organization	28/692	343/18670	8.46741e-05	0.0035838	0.00302575	ARHGAP17/ARHGAP35/ARHGEF10L/ARPC1B/CARMIL1/CD2AP/CORO1B/CTNNA2/CYFIP1/DLG1/DSTN/EPS8/FES/FSCN1/GMFB/GMFG/HCLS1/NCKAP1L/NRP1/PFN2/RAC1/RAC3/SDC4/SNX9/SWAP70/SYNPO2/TMOD2/VIL1	28
GO:0002478	antigen processing and presentation of exogenous peptide antigen	18/692	175/18670	9.14526e-05	0.00382184	0.00322673	AP1B1/DYNC1LI1/IFI30/ITGAV/KIF2A/PDIA3/PSMA8/PSMB1/PSMB7/PSMC2/PSMC6/PSMD11/PSMD2/PSMD5/PSMD9/PSME1/RAB7A/SAR1B	18
GO:1900371	regulation of purine nucleotide biosynthetic process	8/692	40/18670	9.18826e-05	0.00382184	0.00322673	AK4/GUCA2A/NOS1/PARP1/PDK1/PDK2/PDK4/PDPR	8
GO:1900407	regulation of cellular response to oxidative stress	12/692	88/18670	9.51363e-05	0.00386934	0.00326683	ABCD1/FBLN5/FBXO7/GPX1/HDAC6/LANCL1/MEAK7/PARP1/PSAP/RACK1/UBQLN1/VNN1	12
GO:0000375	RNA splicing, via transesterification reactions	30/692	382/18670	9.65305e-05	0.00386934	0.00326683	BUD31/CLNS1A/CSTF1/CTNNBL1/DCPS/DDX17/DDX41/DDX46/HNRNPD/HNRNPH1/HNRNPH2/KHDRBS1/KHDRBS2/NUP98/POLR2H/PRMT5/PRPF19/RALY/RBM3/RBM8A/SART3/SF1/SF3B2/SRRT/SRSF4/SRSF7/SRSF9/THRAP3/USP39/YBX1	30
GO:0043161	proteasome-mediated ubiquitin-dependent protein catabolic process	32/692	419/18670	9.65702e-05	0.00386934	0.00326683	BUB3/CD2AP/CDC23/CUL2/CUL4B/DDA1/DNAJB12/DNAJC10/ERLEC1/FBXL18/FBXO6/HECTD3/HSPA13/HSPA1A/HSPA1B/NEDD4L/PSEN1/PSMA8/PSMB1/PSMB7/PSMC2/PSMC6/PSMD11/PSMD2/PSMD5/PSMD9/PSME1/RACK1/SEL1L/UBQLN1/UFL1/USP14	32
GO:0000209	protein polyubiquitination	26/692	310/18670	9.6846e-05	0.00386934	0.00326683	CDC23/DTX3L/FBXL18/FBXO6/FBXO7/HDAC6/HERC6/MARCHF5/NEDD4L/PRPF19/PSMA8/PSMB1/PSMB7/PSMC2/PSMC6/PSMD11/PSMD2/PSMD5/PSMD9/PSME1/TRIM21/UBE2L5/UBE2N/UBE2NL/UBE2O/UBE3C	26
GO:0038093	Fc receptor signaling pathway	22/692	241/18670	9.70342e-05	0.00386934	0.00326683	ARPC1B/CYFIP1/HSP90AA1/MYH2/NCKAP1L/NFATC2/PIGR/PSMA8/PSMB1/PSMB7/PSMC2/PSMC6/PSMD11/PSMD2/PSMD5/PSMD9/PSME1/PTK2/RAC1/RAP1A/SYK/VAV1	22
hsa04510	Focal adhesion	24/403	201/8100	5.59002e-05	0.00419252	0.00360409	ARHGAP35/BCAR1/COL1A2/COL6A1/COL6A6/COMP/CRKL/FN1/ITGA7/ITGAV/LAMA5/MAP2K1/PRKCA/PTK2/RAC1/RAC2/RAC3/RAP1A/RAP1B/THBS2/THBS3/THBS4/TNC/VAV1	24
GO:0030808	regulation of nucleotide biosynthetic process	8/692	41/18670	0.000110487	0.00430899	0.00363802	AK4/GUCA2A/NOS1/PARP1/PDK1/PDK2/PDK4/PDPR	8
GO:0035337	fatty-acyl-CoA metabolic process	8/692	41/18670	0.000110487	0.00430899	0.00363802	ABCD1/ACAT1/ACSL1/ACSL3/CBR4/ELOVL7/FASN/HSD17B8	8
GO:0007229	integrin-mediated signaling pathway	13/692	103/18670	0.000110739	0.00430899	0.00363802	ANGPTL3/BCAR1/CD63/COL3A1/ITGA7/ITGAL/ITGAV/LAMA5/MADCAM1/NRP1/PTK2/SYK/VAV1	13
GO:0006085	acetyl-CoA biosynthetic process	6/692	22/18670	0.000113805	0.00439287	0.00370884	ACAT1/DLAT/PDK1/PDK2/PDK4/PDPR	6
GO:0051702	interaction with symbiont	11/692	77/18670	0.000120717	0.00458628	0.00387213	ARG1/CCNK/CCNT1/FN1/GPX1/GTF2B/HPN/IGF2R/PPIB/SMARCA4/SMC3	11
GO:0061418	regulation of transcription from RNA polymerase II promoter in response to hypoxia	11/692	77/18670	0.000120717	0.00458628	0.00387213	CUL2/PSMA8/PSMB1/PSMB7/PSMC2/PSMC6/PSMD11/PSMD2/PSMD5/PSMD9/PSME1	11
GO:0032970	regulation of actin filament-based process	30/692	388/18670	0.000127326	0.0047996	0.00405224	ARHGAP17/ARHGAP35/ARHGEF10L/ARPC1B/ATP2A1/CARMIL1/CD2AP/CORO1B/CTNNA2/CYFIP1/DLG1/DSTN/EPS8/FES/FSCN1/GMFB/GMFG/HCLS1/NCKAP1L/NRP1/PFN2/PKP2/RAC1/RAC3/SDC4/SNX9/SWAP70/SYNPO2/TMOD2/VIL1	30
GO:1903313	positive regulation of mRNA metabolic process	11/692	78/18670	0.000135907	0.00508334	0.0042918	CDC73/CNOT1/HNRNPD/NUP98/PAF1/PRPF19/RBM3/RIDA/THRAP3/UPF1/ZC3HAV1	11
GO:0006403	RNA localization	21/692	230/18670	0.000138333	0.00513427	0.0043348	A1CF/AGFG1/CCT2/CCT6A/CKAP5/EIF5A/KHDRBS1/KIF5C/NOP58/NUP133/NUP205/NUP85/NUP98/RBM8A/SEH1L/SRSF4/SRSF7/SRSF9/THOC5/THOC6/UPF1	21
GO:0046949	fatty-acyl-CoA biosynthetic process	7/692	32/18670	0.000139592	0.00514146	0.00434087	ACAT1/ACSL1/ACSL3/CBR4/ELOVL7/FASN/HSD17B8	7
GO:0006090	pyruvate metabolic process	16/692	150/18670	0.000144762	0.0052915	0.00446755	DLAT/FBP1/FOXK1/HK1/HK2/ME2/NUP133/NUP205/NUP85/NUP98/PDK1/PDK2/PDK4/PDPR/PSEN1/SEH1L	16
GO:0006405	RNA export from nucleus	15/692	135/18670	0.000146816	0.00529307	0.00446887	AGFG1/EIF5A/KHDRBS1/NUP133/NUP205/NUP85/NUP98/RBM8A/SEH1L/SRSF4/SRSF7/SRSF9/THOC5/THOC6/UPF1	15
GO:0051188	cofactor biosynthetic process	21/692	231/18670	0.000146999	0.00529307	0.00446887	ACAT1/ACSL1/ACSL3/CBR4/CIAO1/COQ3/DCAKD/DLAT/ELOVL7/FASN/GGCT/GGT5/HSD17B8/ISCA2/NAXE/NDUFA9/PDK1/PDK2/PDK4/PDPR/PNPO	21
GO:1901606	alpha-amino acid catabolic process	13/692	106/18670	0.000148741	0.00531095	0.00448396	ACAT1/ALDH7A1/ARG1/ATP2B4/BCAT2/GLUD1/GPT/IVD/MCCC1/MCCC2/NOS1/PADI4/RIDA	13
GO:0002244	hematopoietic progenitor cell differentiation	17/692	166/18670	0.000149844	0.00531095	0.00448396	CDK6/EEF2/HERC6/PSEN1/PSMA8/PSMB1/PSMB7/PSMC2/PSMC6/PSMD11/PSMD2/PSMD5/PSMD9/PSME1/SERPINB12/SIN3A/YAP1	17
GO:0019884	antigen processing and presentation of exogenous antigen	18/692	182/18670	0.000150992	0.00531095	0.00448396	AP1B1/DYNC1LI1/IFI30/ITGAV/KIF2A/PDIA3/PSMA8/PSMB1/PSMB7/PSMC2/PSMC6/PSMD11/PSMD2/PSMD5/PSMD9/PSME1/RAB7A/SAR1B	18
GO:0042762	regulation of sulfur metabolic process	5/692	15/18670	0.000151899	0.00531095	0.00448396	BHMT/PDK1/PDK2/PDK4/PDPR	5
GO:0002833	positive regulation of response to biotic stimulus	22/692	249/18670	0.000155929	0.00541263	0.00456981	ARG1/CADM1/GRN/HMGB1/HMGB3/ICAM3/PRKCA/PSMA8/PSMB1/PSMB7/PSMC2/PSMC6/PSMD11/PSMD2/PSMD5/PSMD9/PSME1/RBM14/SIN3A/SYK/TBK1/VAV1	22
GO:0009185	ribonucleoside diphosphate metabolic process	15/692	136/18670	0.000159487	0.00549661	0.00464072	AK4/AK5/DLG1/FBP1/FOXK1/HK1/HK2/MPP1/NUDT5/NUP133/NUP205/NUP85/NUP98/PSEN1/SEH1L	15
GO:0036473	cell death in response to oxidative stress	12/692	93/18670	0.000163068	0.00558015	0.00471125	FBXO7/GPX1/HDAC6/LANCL1/MEAK7/PARP1/PDCD10/PDK1/PSAP/RACK1/UBQLN1/VNN1	12
GO:0050684	regulation of mRNA processing	15/692	137/18670	0.000173097	0.00584052	0.00493107	CCNT1/CDC73/DDX17/KHDRBS1/KHDRBS2/NUP98/PAF1/PRPF19/RBM3/RBM8A/SART3/SRSF4/SRSF7/SRSF9/THRAP3	15
GO:0072655	establishment of protein localization to mitochondrion	15/692	137/18670	0.000173097	0.00584052	0.00493107	AIP/DNAJA1/FBXO7/HK1/HK2/HSP90AA1/HSPA4/LMAN1/NDUFA13/PMPCA/PMPCB/RAC2/SAMM50/TIMM10/TIMM44	15
GO:0007007	inner mitochondrial membrane organization	8/692	44/18670	0.000185822	0.00622631	0.00525679	APOOL/ATP5F1A/ATP5F1B/ATP5MF/ATP5PB/NDUFA13/SAMM50/TIMM10	8
GO:0050817	coagulation	27/692	342/18670	0.000195057	0.00649068	0.00547999	CARMIL1/CD9/COL1A2/COL3A1/COMP/CSRP1/DOCK6/DOCK8/EHD1/F11/FBLN1/ITPR1/ITPR2/LMAN1/METAP1/MICAL1/P2RX4/PAPSS2/PRKCA/PROZ/PRTN3/PSEN1/RAB27A/RAC1/SYK/TMPRSS6/VAV1	27
GO:0009132	nucleoside diphosphate metabolic process	16/692	154/18670	0.000196722	0.00650125	0.00548892	AK4/AK5/DLG1/FBP1/FOXK1/HK1/HK2/MPP1/NME3/NUDT5/NUP133/NUP205/NUP85/NUP98/PSEN1/SEH1L	16
GO:1903706	regulation of hemopoiesis	34/692	475/18670	0.000204905	0.00672562	0.00567836	ADIPOQ/AGO3/CDC73/CDK6/CTNNBIP1/FBXO7/FES/HCLS1/HMGB1/HMGB3/HSPA1A/HSPA1B/LGALS9/NCKAP1L/NFATC2/PAF1/PNP/PRKCA/PRMT1/PSMA8/PSMB1/PSMB7/PSMC2/PSMC6/PSMD11/PSMD2/PSMD5/PSMD9/PSME1/SIN3A/STAT5B/SYK/VNN1/YAP1	34
GO:0031331	positive regulation of cellular catabolic process	28/692	362/18670	0.000210183	0.00680028	0.00574139	ABCD1/BAG2/CALCOCO2/CNOT1/DDA1/DTX3L/FBXO7/HDAC6/HK2/HMGB1/HNRNPD/HSP90AA1/HSPA1A/HSPA1B/NRDC/PSEN1/PSMC2/PTK2/RAB3GAP1/RACK1/RIDA/SNX9/TBK1/TRIM21/TSC2/UBQLN1/UPF1/ZC3HAV1	28
GO:0097581	lamellipodium organization	11/692	82/18670	0.000213996	0.00680028	0.00574139	ARHGEF6/CARMIL1/CD44/CORO1B/CYFIP1/FSCN1/NUP85/RAC1/RAC2/SNX2/VIL1	11
GO:0006086	acetyl-CoA biosynthetic process from pyruvate	5/692	16/18670	0.000214227	0.00680028	0.00574139	DLAT/PDK1/PDK2/PDK4/PDPR	5
GO:0034315	regulation of Arp2/3 complex-mediated actin nucleation	5/692	16/18670	0.000214227	0.00680028	0.00574139	CORO1B/CTNNA2/CYFIP1/GMFB/GMFG	5
GO:0034975	protein folding in endoplasmic reticulum	5/692	16/18670	0.000214227	0.00680028	0.00574139	DNAJC10/DNAJC3/EMC1/EMC2/PDIA3	5
GO:0006418	tRNA aminoacylation for protein translation	8/692	45/18670	0.000218747	0.00685359	0.0057864	AARS2/AARSD1/HARS1/IARS1/PPA1/SARS2/TARS3/YARS1	8
GO:0035987	endodermal cell differentiation	8/692	45/18670	0.000218747	0.00685359	0.0057864	CDC73/COL12A1/COL6A1/FN1/ITGA7/ITGAV/MMP9/PAF1	8
GO:0009063	cellular amino acid catabolic process	14/692	125/18670	0.000222399	0.00692308	0.00584506	ACAT1/ALDH5A1/ALDH7A1/ARG1/ATP2B4/BCAT2/GLUD1/GPT/IVD/MCCC1/MCCC2/NOS1/PADI4/RIDA	14
GO:0043903	regulation of interspecies interactions between organisms	20/692	222/18670	0.000236479	0.00731418	0.00617527	ARG1/CCNK/CCNT1/CHMP2A/GTF2B/HPN/IGF2R/ITGAV/LGALS9/MX1/NELFA/PDE12/POLR2H/PPIB/RAB7A/SMARCA4/SMC3/TRIM21/VPS37B/ZC3HAV1	20
GO:1902882	regulation of response to oxidative stress	12/692	97/18670	0.000243911	0.00749599	0.00632876	ABCD1/FBLN5/FBXO7/GPX1/HDAC6/LANCL1/MEAK7/PARP1/PSAP/RACK1/UBQLN1/VNN1	12
GO:0002218	activation of innate immune response	15/692	142/18670	0.000257315	0.00785788	0.00663431	HMGB1/ICAM3/PSMA8/PSMB1/PSMB7/PSMC2/PSMC6/PSMD11/PSMD2/PSMD5/PSMD9/PSME1/RBM14/SIN3A/SYK	15
GO:0071426	ribonucleoprotein complex export from nucleus	14/692	127/18670	0.000262753	0.00797347	0.0067319	AGFG1/EIF5A/NUP133/NUP205/NUP85/NUP98/RBM8A/SEH1L/SRSF4/SRSF7/SRSF9/THOC5/THOC6/UPF1	14
GO:0000956	nuclear-transcribed mRNA catabolic process	19/692	207/18670	0.000264745	0.00798372	0.00674055	CNOT1/DCPS/GSPT2/PDE12/PPP2R1A/RBM8A/RPL10A/RPL17/RPL18A/RPL22/RPL24/RPL30/RPL36/RPS10/RPS15A/RPS23/RPS24/THRAP3/UPF1	19
GO:0006626	protein targeting to mitochondrion	12/692	98/18670	0.000268756	0.00800462	0.00675819	AIP/FBXO7/HSP90AA1/HSPA4/LMAN1/NDUFA13/PMPCA/PMPCB/RAC2/SAMM50/TIMM10/TIMM44	12
GO:0048024	regulation of mRNA splicing, via spliceosome	12/692	98/18670	0.000268756	0.00800462	0.00675819	DDX17/KHDRBS1/KHDRBS2/NUP98/PRPF19/RBM3/RBM8A/SART3/SRSF4/SRSF7/SRSF9/THRAP3	12
GO:0030198	extracellular matrix organization	28/692	368/18670	0.000275189	0.00814594	0.00687751	B4GALT1/CD44/COL12A1/COL1A2/COL3A1/COL6A1/COMP/FBLN1/FBLN5/FN1/FSCN1/HPN/ICAM3/ITGA7/ITGAL/ITGAV/LAMA5/MADCAM1/MFAP4/MMP19/MMP9/MYO1E/PLOD1/POSTN/PTK2/QSOX1/TMPRSS6/TNC	28
GO:0007034	vacuolar transport	15/692	143/18670	0.00027785	0.00817456	0.00690168	CHMP2A/DTX3L/GOSR2/GRN/HOOK1/HOOK3/HSPA1A/IGF2R/M6PR/PSAP/RAB7A/VPS18/VPS36/VPS37B/VTI1B	15
GO:0071166	ribonucleoprotein complex localization	14/692	128/18670	0.000285184	0.00833596	0.00703794	AGFG1/EIF5A/NUP133/NUP205/NUP85/NUP98/RBM8A/SEH1L/SRSF4/SRSF7/SRSF9/THOC5/THOC6/UPF1	14
GO:0043062	extracellular structure organization	28/692	369/18670	0.000287606	0.00833596	0.00703794	B4GALT1/CD44/COL12A1/COL1A2/COL3A1/COL6A1/COMP/FBLN1/FBLN5/FN1/FSCN1/HPN/ICAM3/ITGA7/ITGAL/ITGAV/LAMA5/MADCAM1/MFAP4/MMP19/MMP9/MYO1E/PLOD1/POSTN/PTK2/QSOX1/TMPRSS6/TNC	28
GO:0090150	establishment of protein localization to membrane	26/692	332/18670	0.000288519	0.00833596	0.00703794	ACSL3/CLSTN1/GOLGA4/HSP90AA1/HSPA4/NDUFA13/NECTIN3/RAB3GAP1/RAB8A/RACK1/RPL10A/RPL17/RPL18A/RPL22/RPL24/RPL30/RPL36/RPS10/RPS15A/RPS23/RPS24/SAMM50/SNAP25/SSR1/TIMM10/VPS37B	26
GO:0019395	fatty acid oxidation	12/692	99/18670	0.000295718	0.00849309	0.0071706	ABCD1/ACADM/ACADVL/ACAT1/ADIPOQ/CRAT/ECH1/ECI2/ETFDH/FABP3/IVD/PDK4	12
GO:0019882	antigen processing and presentation	20/692	226/18670	0.000299259	0.00852938	0.00720124	AP1B1/DYNC1LI1/IDE/IFI30/ITGAV/KIF2A/PDIA3/PSMA8/PSMB1/PSMB7/PSMC2/PSMC6/PSMD11/PSMD2/PSMD5/PSMD9/PSME1/RAB27A/RAB7A/SAR1B	20
GO:0032535	regulation of cellular component size	28/692	370/18670	0.000300517	0.00852938	0.00720124	ARHGAP35/ARPC1B/CARMIL1/CLNS1A/CORO1B/CTNNA2/CYFIP1/DLG1/DSTN/EPS8/FN1/GMFB/GMFG/GOLGA4/HCLS1/NCKAP1L/NEFL/NRP1/PFN2/RAC1/RAC3/SIN3A/SLC9A3R1/SNX9/SWAP70/TMOD2/VAV1/VIL1	28
GO:0006635	fatty acid beta-oxidation	10/692	72/18670	0.000308572	0.00868014	0.00732853	ABCD1/ACADM/ACADVL/ACAT1/ADIPOQ/CRAT/ECH1/ECI2/ETFDH/IVD	10
GO:0051125	regulation of actin nucleation	6/692	26/18670	0.000309427	0.00868014	0.00732853	CORO1B/CTNNA2/CYFIP1/GMFB/GMFG/VIL1	6
GO:0070498	interleukin-1-mediated signaling pathway	12/692	100/18670	0.000324939	0.00906262	0.00765145	PSMA8/PSMB1/PSMB7/PSMC2/PSMC6/PSMD11/PSMD2/PSMD5/PSMD9/PSME1/SQSTM1/UBE2N	12
GO:0051014	actin filament severing	4/692	10/18670	0.000328615	0.00911244	0.00769352	DSTN/GMFB/GMFG/VIL1	4
GO:0050821	protein stabilization	17/692	178/18670	0.000345255	0.00946673	0.00799263	A1CF/ATP1B3/BAG2/CCT2/CCT6A/DSG1/GRN/HSP90AA1/HSPA1A/HSPA1B/NAA15/PDCD10/PFN2/PPIB/SEL1L/TELO2/USP9X	17
GO:0007596	blood coagulation	26/692	336/18670	0.000347086	0.00946673	0.00799263	CARMIL1/CD9/COL1A2/COL3A1/COMP/CSRP1/DOCK6/DOCK8/EHD1/F11/FBLN1/ITPR1/ITPR2/LMAN1/METAP1/MICAL1/P2RX4/PAPSS2/PRKCA/PROZ/PRTN3/RAB27A/RAC1/SYK/TMPRSS6/VAV1	26
GO:0043039	tRNA aminoacylation	8/692	48/18670	0.000347277	0.00946673	0.00799263	AARS2/AARSD1/HARS1/IARS1/PPA1/SARS2/TARS3/YARS1	8
GO:0030833	regulation of actin filament polymerization	16/692	162/18670	0.000350788	0.00950873	0.00802809	ARPC1B/CARMIL1/CORO1B/CTNNA2/CYFIP1/DLG1/EPS8/GMFB/GMFG/HCLS1/NCKAP1L/PFN2/RAC3/SNX9/TMOD2/VIL1	16
GO:0046394	carboxylic acid biosynthetic process	27/692	355/18670	0.000353671	0.00953331	0.00804885	ABCD1/ACADVL/ACSL3/ADIPOQ/AKR1C3/ASL/ATP2B4/BCAT2/BHMT/BHMT2/CBR4/CPS1/ELOVL7/FASN/GGT2/GGT5/GLUD1/GPT/GSTM4/HSD17B8/PDK4/PLOD1/PTGDS/RBP1/SEPHS2/SYK/TBXAS1	27
GO:0034440	lipid oxidation	12/692	101/18670	0.00035657	0.00955806	0.00806975	ABCD1/ACADM/ACADVL/ACAT1/ADIPOQ/CRAT/ECH1/ECI2/ETFDH/FABP3/IVD/PDK4	12
GO:0016053	organic acid biosynthetic process	27/692	356/18670	0.000369629	0.00985338	0.00831908	ABCD1/ACADVL/ACSL3/ADIPOQ/AKR1C3/ASL/ATP2B4/BCAT2/BHMT/BHMT2/CBR4/CPS1/ELOVL7/FASN/GGT2/GGT5/GLUD1/GPT/GSTM4/HSD17B8/PDK4/PLOD1/PTGDS/RBP1/SEPHS2/SYK/TBXAS1	27
GO:0010769	regulation of cell morphogenesis involved in differentiation	24/692	301/18670	0.000375488	0.00995455	0.0084045	ADGRB3/ARHGAP35/CARMIL1/CRKL/CUX1/CYFIP1/FBLN1/FN1/GBP1/GOLGA4/MAP2K1/MYCBP2/NEDD4L/NEFL/NRP1/OLFM4/PLXNA1/POSTN/PSEN1/PTK2/RAC1/RAC3/SARM1/SIN3A	24
GO:0032233	positive regulation of actin filament bundle assembly	9/692	61/18670	0.000387174	0.0102083	0.00861871	ARHGEF10L/CARMIL1/NRP1/PFN2/RAC1/SDC4/SWAP70/SYNPO2/VIL1	9
GO:0043038	amino acid activation	8/692	49/18670	0.000401745	0.0105092	0.00887277	AARS2/AARSD1/HARS1/IARS1/PPA1/SARS2/TARS3/YARS1	8
GO:0045089	positive regulation of innate immune response	19/692	214/18670	0.000402943	0.0105092	0.00887277	CADM1/HMGB1/HMGB3/ICAM3/PSMA8/PSMB1/PSMB7/PSMC2/PSMC6/PSMD11/PSMD2/PSMD5/PSMD9/PSME1/RBM14/SIN3A/SYK/TBK1/VAV1	19
hsa04145	Phagosome	19/403	152/8100	0.000181564	0.0108938	0.00936488	ATP6V0A1/ATP6V1E1/COLEC11/COMP/DYNC1LI1/ITGAV/M6PR/MPO/NOS1/RAB7A/RAC1/STX7/TCIRG1/THBS2/THBS3/THBS4/TUBB1/TUBB3/TUBB8	19
GO:1903201	regulation of oxidative stress-induced cell death	10/692	75/18670	0.000431841	0.0112023	0.00945798	FBXO7/GPX1/HDAC6/LANCL1/MEAK7/PARP1/PSAP/RACK1/UBQLN1/VNN1	10
GO:0007599	hemostasis	26/692	341/18670	0.000434873	0.0112206	0.00947345	CARMIL1/CD9/COL1A2/COL3A1/COMP/CSRP1/DOCK6/DOCK8/EHD1/F11/FBLN1/ITPR1/ITPR2/LMAN1/METAP1/MICAL1/P2RX4/PAPSS2/PRKCA/PROZ/PRTN3/RAB27A/RAC1/SYK/TMPRSS6/VAV1	26
GO:0030041	actin filament polymerization	17/692	182/18670	0.000447278	0.0114793	0.00969185	ARPC1B/CARMIL1/CORO1B/CTNNA2/CYFIP1/DLG1/EPS8/GMFB/GMFG/HCLS1/NCKAP1L/PFN2/RAC1/RAC3/SNX9/TMOD2/VIL1	17
GO:0009135	purine nucleoside diphosphate metabolic process	14/692	134/18670	0.000457308	0.0115524	0.00975355	AK4/AK5/DLG1/FBP1/FOXK1/HK1/HK2/MPP1/NUP133/NUP205/NUP85/NUP98/PSEN1/SEH1L	14
GO:0009179	purine ribonucleoside diphosphate metabolic process	14/692	134/18670	0.000457308	0.0115524	0.00975355	AK4/AK5/DLG1/FBP1/FOXK1/HK1/HK2/MPP1/NUP133/NUP205/NUP85/NUP98/PSEN1/SEH1L	14
GO:0046939	nucleotide phosphorylation	14/692	134/18670	0.000457308	0.0115524	0.00975355	AK4/AK5/FBP1/FOXK1/HK1/HK2/NME3/NUP133/NUP205/NUP85/NUP98/PNKP/PSEN1/SEH1L	14
GO:0001706	endoderm formation	8/692	50/18670	0.000462957	0.0115739	0.00977171	CDC73/COL12A1/COL6A1/FN1/ITGA7/ITGAV/MMP9/PAF1	8
GO:0045104	intermediate filament cytoskeleton organization	8/692	50/18670	0.000462957	0.0115739	0.00977171	AGFG1/FAM83H/INA/KRT14/KRT3/NEFL/PKP1/PKP2	8
GO:0008045	motor neuron axon guidance	6/692	28/18670	0.000475361	0.0116639	0.00984767	ALCAM/KIF5C/MYCBP2/NRP1/RAC1/RAC2	6
GO:0060260	regulation of transcription initiation from RNA polymerase II promoter	6/692	28/18670	0.000475361	0.0116639	0.00984767	CAND1/CTNNBIP1/GTF2B/HMGB1/PSMC2/PSMC6	6
GO:1902745	positive regulation of lamellipodium organization	6/692	28/18670	0.000475361	0.0116639	0.00984767	CARMIL1/CORO1B/FSCN1/RAC1/RAC2/VIL1	6
GO:0044242	cellular lipid catabolic process	19/692	217/18670	0.000479137	0.0116639	0.00984767	ABCD1/ABHD12/ACADM/ACADVL/ACAT1/ADIPOQ/AKR1C3/ANGPTL3/APOB/CPS1/CRAT/ECH1/ECI2/ENPP6/ENPP7/ETFDH/FABP3/IVD/PSAP	19
GO:0042176	regulation of protein catabolic process	28/692	381/18670	0.00048029	0.0116639	0.00984767	BAG2/CUL4B/DDA1/EEF1A1/EEF1A2/ERLEC1/GPX1/HSP90AA1/HSPA1A/HSPA1B/IDE/MYCBP2/NDUFA13/NEDD4L/NRDC/PSEN1/PSMC2/PSMD2/PSME1/PTK2/RAB7A/RACK1/SCO1/SERPINB12/SNX9/UBQLN1/UFL1/USP14	28
GO:0045454	cell redox homeostasis	10/692	76/18670	0.00048106	0.0116639	0.00984767	DNAJC10/GPX1/MPO/NHLRC2/NOS1/PDIA3/PDIA4/PDIA6/QSOX1/RAC2	10
GO:0043484	regulation of RNA splicing	14/692	135/18670	0.000493233	0.0118992	0.0100464	DDX17/HNRNPH1/HSPA1A/KHDRBS1/KHDRBS2/NUP98/PRPF19/RBM3/RBM8A/SART3/SRSF4/SRSF7/SRSF9/THRAP3	14
GO:0033539	fatty acid beta-oxidation using acyl-CoA dehydrogenase	4/692	11/18670	0.000501281	0.0120332	0.0101595	ACADM/ACADVL/ETFDH/IVD	4
GO:0051131	chaperone-mediated protein complex assembly	5/692	19/18670	0.000519934	0.0124192	0.0104854	CCT2/HDAC6/HSP90AA1/HSPA1A/HSPA4	5
GO:0045103	intermediate filament-based process	8/692	51/18670	0.000531519	0.0125423	0.0105893	AGFG1/FAM83H/INA/KRT14/KRT3/NEFL/PKP1/PKP2	8
GO:0072523	purine-containing compound catabolic process	8/692	51/18670	0.000531519	0.0125423	0.0105893	ABCD1/ACAT1/AOX1/GPX1/NT5C/NT5E/PNP/SAMHD1	8
GO:0048678	response to axon injury	10/692	77/18670	0.000534842	0.0125423	0.0105893	ARG1/DPYSL3/GAP43/GRN/MAP2K1/NEFL/P2RX4/RTN4RL2/SARM1/TNC	10
GO:0051028	mRNA transport	15/692	152/18670	0.000535487	0.0125423	0.0105893	AGFG1/EIF5A/KIF5C/NUP133/NUP205/NUP85/NUP98/RBM8A/SEH1L/SRSF4/SRSF7/SRSF9/THOC5/THOC6/UPF1	15
GO:0043618	regulation of transcription from RNA polymerase II promoter in response to stress	13/692	121/18670	0.000552718	0.0128834	0.0108773	CUL2/HSPA1A/PSMA8/PSMB1/PSMB7/PSMC2/PSMC6/PSMD11/PSMD2/PSMD5/PSMD9/PSME1/SIN3A	13
GO:1901607	alpha-amino acid biosynthetic process	9/692	64/18670	0.000557139	0.012924	0.0109116	ASL/ATP2B4/BCAT2/BHMT/BHMT2/CPS1/GLUD1/PLOD1/SEPHS2	9
hsa05016	Huntington disease	30/403	306/8100	0.000270209	0.013102	0.0112631	ATP5F1A/ATP5F1B/ATP5PB/CLTCL1/GPX1/GPX2/ITPR1/KIF5C/NDUFA13/NDUFA4/NDUFA9/POLR2H/PSMA8/PSMB1/PSMB7/PSMC2/PSMC6/PSMD11/PSMD2/PSMD9/SDHA/SDHB/SIN3A/SLC1A2/SLC25A4/STX1A/TUBB1/TUBB3/TUBB8/UQCRQ	30
hsa04141	Protein processing in endoplasmic reticulum	20/403	171/8100	0.000305714	0.013102	0.0112631	BAG2/DNAJA1/DNAJB11/DNAJB12/DNAJC10/DNAJC3/ERLEC1/FBXO6/HSP90AA1/HSPA1A/HSPA1B/HSPH1/LMAN1/PDIA3/PDIA4/PDIA6/SAR1B/SEL1L/SSR1/UBQLN1	20
GO:0042133	neurotransmitter metabolic process	15/692	153/18670	0.000573865	0.0132483	0.0111854	ALDH5A1/ALDH7A1/ATP2B4/BHMT/CHDH/CPS1/DBH/DMGDH/ENPP6/HSP90AA1/NOS1/P2RX4/RAC1/RIDA/SIRPA	15
hsa03050	Proteasome	9/403	46/8100	0.000364239	0.013659	0.0117419	PSMA8/PSMB1/PSMB7/PSMC2/PSMC6/PSMD11/PSMD2/PSMD9/PSME1	9
hsa04972	Pancreatic secretion	14/403	102/8100	0.000489962	0.0137949	0.0118587	ATP1B3/ATP2A1/ATP2B1/ATP2B2/ATP2B4/CPA2/CPA3/ITPR1/ITPR2/PRKCA/RAB8A/RAC1/RAP1A/RAP1B	14
hsa00280	Valine, leucine and isoleucine degradation	9/403	48/8100	0.000507665	0.0137949	0.0118587	ACADM/ACAT1/ALDH7A1/AOX1/BCAT2/HMGCS2/IVD/MCCC1/MCCC2	9
hsa00520	Amino sugar and nucleotide sugar metabolism	9/403	48/8100	0.000507665	0.0137949	0.0118587	AMDHD2/CYB5R1/CYB5R2/FCSK/GALE/HEXA/HK1/HK2/MPI	9
hsa00220	Arginine biosynthesis	6/403	22/8100	0.000551795	0.0137949	0.0118587	ARG1/ASL/CPS1/GLUD1/GPT/NOS1	6
hsa05012	Parkinson disease	25/403	249/8100	0.000612584	0.0141366	0.0121525	ATP5F1A/ATP5F1B/ATP5PB/ITPR1/ITPR2/KIF5C/NDUFA13/NDUFA4/NDUFA9/PSMA8/PSMB1/PSMB7/PSMC2/PSMC6/PSMD11/PSMD2/PSMD9/SDHA/SDHB/SLC25A4/TUBB1/TUBB3/TUBB8/UBA1/UQCRQ	25
hsa05022	Pathways of neurodegeneration - multiple diseases	40/403	475/8100	0.000671756	0.0143948	0.0123744	ATP2A1/ATP5F1A/ATP5F1B/ATP5PB/GPX1/GPX2/ITPR1/ITPR2/KIF5C/MAP2K1/MAP2K2/MAP2K3/NDUFA13/NDUFA4/NDUFA9/NEFL/NOS1/PRKCA/PSEN1/PSMA8/PSMB1/PSMB7/PSMC2/PSMC6/PSMD11/PSMD2/PSMD9/RAB8A/RAC1/SDHA/SDHB/SLC25A4/SQSTM1/STX1A/TBK1/TUBB1/TUBB3/TUBB8/UBA1/UQCRQ	40
GO:0010972	negative regulation of G2/M transition of mitotic cell cycle	11/692	93/18670	0.000645283	0.0148262	0.0125175	BLM/PSMA8/PSMB1/PSMB7/PSMC2/PSMC6/PSMD11/PSMD2/PSMD5/PSMD9/PSME1	11
GO:0006839	mitochondrial transport	21/692	258/18670	0.000652837	0.0149286	0.012604	AIP/ATP5F1A/ATP5F1B/ATP5MF/ATP5PB/FBXO7/HK2/HSP90AA1/HSPA1A/HSPA4/LMAN1/NDUFA13/PMPCA/PMPCB/PSEN1/RAC2/SAMM50/SFXN3/SLC25A13/TIMM10/TIMM44	21
GO:1900034	regulation of cellular response to heat	10/692	79/18670	0.000657396	0.014962	0.0126322	BAG2/HSP90AA1/HSPA1A/HSPA1B/HSPH1/NUP133/NUP205/NUP85/NUP98/SEH1L	10
GO:0006613	cotranslational protein targeting to membrane	12/692	109/18670	0.000716689	0.0162349	0.0137069	RPL10A/RPL17/RPL18A/RPL22/RPL24/RPL30/RPL36/RPS10/RPS15A/RPS23/RPS24/SSR1	12
GO:0070555	response to interleukin-1	18/692	207/18670	0.000724059	0.0163054	0.0137665	AKAP12/GBP1/LGALS9/PRKCA/PSMA8/PSMB1/PSMB7/PSMC2/PSMC6/PSMD11/PSMD2/PSMD5/PSMD9/PSME1/SIRPA/SQSTM1/UBE2N/UPF1	18
GO:0009142	nucleoside triphosphate biosynthetic process	10/692	80/18670	0.000726851	0.0163054	0.0137665	AK4/AK5/ATP5F1A/ATP5F1B/ATP5MF/ATP5PB/CTPS1/NME3/PARP1/SLC25A13	10
GO:0006527	arginine catabolic process	4/692	12/18670	0.000729943	0.0163054	0.0137665	ARG1/ATP2B4/NOS1/PADI4	4
GO:0050792	regulation of viral process	18/692	208/18670	0.000765985	0.0170317	0.0143796	CCNK/CCNT1/CHMP2A/GTF2B/HPN/IGF2R/LGALS9/MX1/NELFA/PDE12/POLR2H/PPIB/RAB7A/SMARCA4/SMC3/TRIM21/VPS37B/ZC3HAV1	18
GO:0001505	regulation of neurotransmitter levels	26/692	355/18670	0.000792527	0.017541	0.0148097	ALDH5A1/ALDH7A1/ATP2B4/BHMT/CHDH/CPS1/DBH/DMGDH/ENPP6/HSP90AA1/NAPB/NOS1/P2RX4/PFN2/PSEN1/RAB3GAP1/RAC1/RAP1A/RAP1B/RIDA/SIRPA/SLC1A2/SNAP25/SNAP29/STX1A/VPS18	26
GO:0008652	cellular amino acid biosynthetic process	10/692	81/18670	0.00080224	0.0176083	0.0148665	ASL/ATP2B4/BCAT2/BHMT/BHMT2/CPS1/GLUD1/GPT/PLOD1/SEPHS2	10
GO:0016482	cytosolic transport	15/692	158/18670	0.000802868	0.0176083	0.0148665	CLTCL1/DOP1B/GOSR2/HOOK1/HOOK3/KIF1A/KIF1B/MAP2K1/MAP2K2/RAB14/RAB7A/SNX2/UBE2O/VPS29/VTI1B	15
GO:1901136	carbohydrate derivative catabolic process	17/692	192/18670	0.000822436	0.0179394	0.015146	ABCD1/ABHD10/ACAT1/AMDHD2/CD44/CTBS/FBXO6/HEXA/NAGLU/NT5C/NT5E/OMD/PNP/PRELP/PSAP/SAMHD1/SDC4	17
GO:0031503	protein-containing complex localization	22/692	281/18670	0.000825397	0.0179394	0.015146	AGFG1/CLSTN1/DLG1/EIF5A/EXOC1/KIF5C/NUP133/NUP205/NUP85/NUP98/RAB8A/RAP1A/RBM8A/SEH1L/SNAP25/SRSF4/SRSF7/SRSF9/STX7/THOC5/THOC6/UPF1	22
GO:0048010	vascular endothelial growth factor receptor signaling pathway	11/692	96/18670	0.000844675	0.0181868	0.0153549	BCAR1/CADM4/CYFIP1/HSP90AA1/ITGAV/NCKAP1L/NRP1/NRP2/PTK2/RAC1/VAV1	11
GO:0050685	positive regulation of mRNA processing	6/692	31/18670	0.00084524	0.0181868	0.0153549	CDC73/NUP98/PAF1/PRPF19/RBM3/THRAP3	6
GO:0009081	branched-chain amino acid metabolic process	5/692	21/18670	0.00085563	0.0181868	0.0153549	ACAT1/BCAT2/IVD/MCCC1/MCCC2	5
GO:0009083	branched-chain amino acid catabolic process	5/692	21/18670	0.00085563	0.0181868	0.0153549	ACAT1/BCAT2/IVD/MCCC1/MCCC2	5
GO:0042135	neurotransmitter catabolic process	5/692	21/18670	0.00085563	0.0181868	0.0153549	ALDH5A1/ALDH7A1/BHMT/CHDH/DMGDH	5
GO:0006413	translational initiation	17/692	193/18670	0.000871616	0.0182834	0.0154364	DNAJC3/EIF3A/EIF3F/EIF3L/EIF5/KHDRBS1/RPL10A/RPL17/RPL18A/RPL22/RPL24/RPL30/RPL36/RPS10/RPS15A/RPS23/RPS24	17
GO:0050657	nucleic acid transport	17/692	193/18670	0.000871616	0.0182834	0.0154364	AGFG1/CKAP5/EIF5A/KHDRBS1/KIF5C/NUP133/NUP205/NUP85/NUP98/RBM8A/SEH1L/SRSF4/SRSF7/SRSF9/THOC5/THOC6/UPF1	17
GO:0050658	RNA transport	17/692	193/18670	0.000871616	0.0182834	0.0154364	AGFG1/CKAP5/EIF5A/KHDRBS1/KIF5C/NUP133/NUP205/NUP85/NUP98/RBM8A/SEH1L/SRSF4/SRSF7/SRSF9/THOC5/THOC6/UPF1	17
GO:0043620	regulation of DNA-templated transcription in response to stress	13/692	127/18670	0.000875329	0.0182834	0.0154364	CUL2/HSPA1A/PSMA8/PSMB1/PSMB7/PSMC2/PSMC6/PSMD11/PSMD2/PSMD5/PSMD9/PSME1/SIN3A	13
GO:0032781	positive regulation of ATPase activity	8/692	55/18670	0.000892505	0.0185618	0.0156715	ATP1B3/DNAJA1/DNAJB11/DNAJC10/MSH3/PFN2/TOR1AIP1/UHRF1	8
GO:0006914	autophagy	33/692	496/18670	0.000907654	0.0187155	0.0158013	ATP6V0A1/ATP6V1E1/CALCOCO2/CHMP2A/EEF1A1/EEF1A2/EXOC1/FBXO7/FOXK1/HDAC6/HK2/HMGB1/HSP90AA1/ITPR1/PACS2/PSAP/PSEN1/PTK2/QSOX1/RAB3GAP1/RAB7A/RAB8A/SNAP29/SQSTM1/SYNPO2/TBK1/TCIRG1/TRIM21/TSC2/UBQLN1/VPS18/VPS36/VPS37B	33
GO:0061919	process utilizing autophagic mechanism	33/692	496/18670	0.000907654	0.0187155	0.0158013	ATP6V0A1/ATP6V1E1/CALCOCO2/CHMP2A/EEF1A1/EEF1A2/EXOC1/FBXO7/FOXK1/HDAC6/HK2/HMGB1/HSP90AA1/ITPR1/PACS2/PSAP/PSEN1/PTK2/QSOX1/RAB3GAP1/RAB7A/RAB8A/SNAP29/SQSTM1/SYNPO2/TBK1/TCIRG1/TRIM21/TSC2/UBQLN1/VPS18/VPS36/VPS37B	33
GO:0070268	cornification	12/692	112/18670	0.000913607	0.0187581	0.0158372	CSTA/DSG1/KRT13/KRT14/KRT3/KRT6B/KRT7/KRT73/KRT76/KRT79/PKP1/PKP2	12
GO:0031647	regulation of protein stability	22/692	284/18670	0.000948832	0.0193988	0.0163781	A1CF/ATP1B3/BAG2/CCT2/CCT6A/CDC73/DSG1/FBXO7/GRN/HDAC6/HSP90AA1/HSPA1A/HSPA1B/NAA15/NEDD4L/PDCD10/PFN2/PPIB/SEL1L/TELO2/TRIM21/USP9X	22
GO:0009201	ribonucleoside triphosphate biosynthetic process	9/692	69/18670	0.000972998	0.0198089	0.0167244	AK4/ATP5F1A/ATP5F1B/ATP5MF/ATP5PB/CTPS1/NME3/PARP1/SLC25A13	9
GO:0002223	stimulatory C-type lectin receptor signaling pathway	12/692	113/18670	0.000988501	0.0200164	0.0168996	ICAM3/PSMA8/PSMB1/PSMB7/PSMC2/PSMC6/PSMD11/PSMD2/PSMD5/PSMD9/PSME1/SYK	12
GO:0050764	regulation of phagocytosis	11/692	98/18670	0.00100405	0.0200164	0.0168996	ADIPOQ/HMGB1/ITGAV/NCKAP1L/PRTN3/RAB27A/RACK1/RAP1A/SIRPA/SIRPB1/SYK	11
GO:0006749	glutathione metabolic process	8/692	56/18670	0.00100802	0.0200164	0.0168996	ALDH5A1/ETHE1/GGCT/GGT2/GGT5/GPX1/GSTA5/GSTM4	8
GO:0050879	multicellular organismal movement	8/692	56/18670	0.00100802	0.0200164	0.0168996	ATP2A1/COMP/EEF2/ITPR1/MYH14/MYH3/MYH7/MYH8	8
GO:0050881	musculoskeletal movement	8/692	56/18670	0.00100802	0.0200164	0.0168996	ATP2A1/COMP/EEF2/ITPR1/MYH14/MYH3/MYH7/MYH8	8
GO:1901661	quinone metabolic process	6/692	32/18670	0.00100808	0.0200164	0.0168996	AKR1C2/AKR1C3/CBR3/CBR4/COQ3/NDUFA9	6
GO:0051236	establishment of RNA localization	17/692	196/18670	0.00103448	0.0204564	0.0172711	AGFG1/CKAP5/EIF5A/KHDRBS1/KIF5C/NUP133/NUP205/NUP85/NUP98/RBM8A/SEH1L/SRSF4/SRSF7/SRSF9/THOC5/THOC6/UPF1	17
GO:0071347	cellular response to interleukin-1	16/692	179/18670	0.00104596	0.0205989	0.0173914	AKAP12/GBP1/PSMA8/PSMB1/PSMB7/PSMC2/PSMC6/PSMD11/PSMD2/PSMD5/PSMD9/PSME1/SIRPA/SQSTM1/UBE2N/UPF1	16
GO:0045088	regulation of innate immune response	23/692	305/18670	0.0010558	0.0207083	0.0174837	ARG1/CADM1/GRN/HMGB1/HMGB3/ICAM3/LGALS9/PSMA8/PSMB1/PSMB7/PSMC2/PSMC6/PSMD11/PSMD2/PSMD5/PSMD9/PSME1/RBM14/SAMHD1/SIN3A/SYK/TBK1/VAV1	23
GO:0050765	negative regulation of phagocytosis	5/692	22/18670	0.00107381	0.0209763	0.01771	ADIPOQ/HMGB1/PRTN3/RACK1/SIRPA	5
GO:0006195	purine nucleotide catabolic process	7/692	44/18670	0.0010811	0.0210335	0.0177583	ABCD1/ACAT1/GPX1/NT5C/NT5E/PNP/SAMHD1	7
GO:0005996	monosaccharide metabolic process	22/692	287/18670	0.00108788	0.0210803	0.0177978	ABHD10/ADIPOQ/ALDH5A1/B4GALT1/CYB5A/DLAT/FBP1/FBP2/FOXK1/GALE/GALM/HK1/HK2/MAN2C1/MDH2/MPI/NLN/NUDT5/PDK1/PDK2/PDK4/SLC25A13	22
GO:0016050	vesicle organization	24/692	325/18670	0.00110824	0.021389	0.0180584	AGFG1/CD2AP/CHMP2A/GOSR2/HOOK1/HOOK3/LMAN1/PPP6R1/RAB14/RAB27A/RAB7A/RAB8A/SAR1B/SDC4/SNAP25/SNAP29/SQSTM1/STX1A/STX7/TMED9/VPS18/VPS36/VPS37B/VTI1B	24
GO:0042407	cristae formation	6/692	33/18670	0.00119398	0.0229519	0.019378	APOOL/ATP5F1A/ATP5F1B/ATP5MF/ATP5PB/SAMM50	6
GO:0051494	negative regulation of cytoskeleton organization	14/692	148/18670	0.00122647	0.023343	0.0197082	CARMIL1/CDH5/CHMP2A/CORO1B/CTNNA2/EPS8/GMFB/GMFG/HDAC6/PFN2/RBM14/SWAP70/TMOD2/VIL1	14
GO:1902743	regulation of lamellipodium organization	7/692	45/18670	0.00123995	0.023343	0.0197082	CARMIL1/CD44/CORO1B/FSCN1/RAC1/RAC2/VIL1	7
GO:0010256	endomembrane system organization	30/692	445/18670	0.00124302	0.023343	0.0197082	ABCD1/AGFG1/CHMP2A/COG2/DOP1B/GOLGA5/HOOK1/HOOK3/LMAN1/MAP2K1/MAP2K2/PACSIN2/PDCD10/PPP2R1A/PRKCA/PRMT5/PSAP/RAB18/RAB27A/RAB3GAP1/RAB7A/SNX9/SQSTM1/TANGO2/TMED7/TMED9/TOR1AIP1/VPS18/VPS36/VPS37B	30
GO:0002220	innate immune response activating cell surface receptor signaling pathway	12/692	116/18670	0.00124444	0.023343	0.0197082	ICAM3/PSMA8/PSMB1/PSMB7/PSMC2/PSMC6/PSMD11/PSMD2/PSMD5/PSMD9/PSME1/SYK	12
GO:2000736	regulation of stem cell differentiation	12/692	116/18670	0.00124444	0.023343	0.0197082	CDK6/PSMA8/PSMB1/PSMB7/PSMC2/PSMC6/PSMD11/PSMD2/PSMD5/PSMD9/PSME1/YAP1	12
GO:0017157	regulation of exocytosis	18/692	217/18670	0.00124656	0.023343	0.0197082	CHMP2A/FES/LGALS9/MICAL1/NAPB/PFN2/RAB27A/RAB3GAP1/RAB7A/RAB8A/RAC2/RAP1A/RAP1B/SDC4/STX1A/STXBP5/SYK/VPS18	18
GO:0006165	nucleoside diphosphate phosphorylation	13/692	132/18670	0.00125302	0.023343	0.0197082	AK4/AK5/FBP1/FOXK1/HK1/HK2/NME3/NUP133/NUP205/NUP85/NUP98/PSEN1/SEH1L	13
GO:0046434	organophosphate catabolic process	13/692	132/18670	0.00125302	0.023343	0.0197082	ABCD1/ABHD12/ACAT1/ANGPTL3/ENPP6/ENPP7/GPX1/IMPA1/NT5C/NT5E/NUDT5/PNP/SAMHD1	13
GO:0071356	cellular response to tumor necrosis factor	22/692	291/18670	0.0013003	0.0241305	0.0203731	ADIPOQ/AKAP12/APOB/CD58/GBP1/HSPA1A/HSPA1B/POSTN/PSMA8/PSMB1/PSMB7/PSMC2/PSMC6/PSMD11/PSMD2/PSMD5/PSMD9/PSME1/RACK1/SYK/TNFRSF21/YBX3	22
hsa05135	Yersinia infection	16/403	137/8100	0.00122	0.0244001	0.0209755	ARHGEF12/ARPC1B/BCAR1/CRKL/FN1/GIT2/MAP2K1/MAP2K2/MAP2K3/NFATC2/PTK2/RAC1/RAC2/RAC3/TBK1/VAV1	16
GO:0009310	amine catabolic process	5/692	23/18670	0.00133066	0.0244123	0.020611	ALDH7A1/ATP2B4/BHMT/CHDH/DMGDH	5
GO:0045109	intermediate filament organization	5/692	23/18670	0.00133066	0.0244123	0.020611	AGFG1/KRT14/NEFL/PKP1/PKP2	5
GO:0097164	ammonium ion metabolic process	5/692	23/18670	0.00133066	0.0244123	0.020611	ALDH7A1/BHMT/CHDH/DMGDH/ENPP6	5
GO:0002758	innate immune response-activating signal transduction	12/692	117/18670	0.00134106	0.0245099	0.0206934	ICAM3/PSMA8/PSMB1/PSMB7/PSMC2/PSMC6/PSMD11/PSMD2/PSMD5/PSMD9/PSME1/SYK	12
GO:0006999	nuclear pore organization	4/692	14/18670	0.00139124	0.0251413	0.0212265	NUP133/NUP205/NUP98/SEH1L	4
GO:0051645	Golgi localization	4/692	14/18670	0.00139124	0.0251413	0.0212265	COPG1/HOOK3/PDCD10/SLC9A3R1	4
GO:0106070	regulation of adenylate cyclase-activating G protein-coupled receptor signaling pathway	4/692	14/18670	0.00139124	0.0251413	0.0212265	APLP1/ATP2B4/NOS1/PRKCA	4
GO:0033209	tumor necrosis factor-mediated signaling pathway	15/692	167/18670	0.00141121	0.025407	0.0214508	ADIPOQ/HSPA1A/HSPA1B/PSMA8/PSMB1/PSMB7/PSMC2/PSMC6/PSMD11/PSMD2/PSMD5/PSMD9/PSME1/RACK1/SYK	15
GO:0033628	regulation of cell adhesion mediated by integrin	7/692	46/18670	0.00141651	0.0254076	0.0214513	CRKL/NCKAP1L/PODXL/PTK2/RAC3/SWAP70/SYK	7
GO:0034612	response to tumor necrosis factor	23/692	312/18670	0.00142519	0.0254213	0.0214628	ADIPOQ/AKAP12/APOB/CD58/GBP1/GGT2/HSPA1A/HSPA1B/POSTN/PSMA8/PSMB1/PSMB7/PSMC2/PSMC6/PSMD11/PSMD2/PSMD5/PSMD9/PSME1/RACK1/SYK/TNFRSF21/YBX3	23
GO:0061077	chaperone-mediated protein folding	8/692	59/18670	0.00142781	0.0254213	0.0214628	CCT2/DNAJB12/HSPA13/HSPA1A/HSPA1B/HSPH1/PDIA4/PPIB	8
GO:1903779	regulation of cardiac conduction	9/692	73/18670	0.00146216	0.0259372	0.0218985	ATP1B3/ATP2A1/ATP2B1/ATP2B2/ATP2B4/ITPR1/ITPR2/NOS1/STIM1	9
hsa05100	Bacterial invasion of epithelial cells	11/403	77/8100	0.00138681	0.0260026	0.0223531	ARPC1B/BCAR1/CD2AP/CLTCL1/CRKL/CTNNA2/FN1/HCLS1/PTK2/RAC1/SEPTIN11	11
hsa00061	Fatty acid biosynthesis	5/403	18/8100	0.00148655	0.0262333	0.0225514	ACSL1/ACSL3/CBR4/FASN/HSD17B8	5
GO:0051851	modulation by host of symbiont process	8/692	60/18670	0.00159499	0.0281899	0.0238004	CCNK/CCNT1/GTF2B/HPN/IGF2R/PPIB/SMARCA4/SMC3	8
GO:0031589	cell-substrate adhesion	25/692	354/18670	0.001643	0.0289324	0.0244273	ANGPTL3/CARMIL1/CD44/CD63/CDK6/COL3A1/CRKL/FBLN1/FBLN5/FN1/GBP1/ITGA7/ITGAL/ITGAV/LAMA5/MADCAM1/NRP1/OLFM4/POSTN/PTK2/RAC1/RAC2/RAC3/SDC4/THBS3	25
GO:0015931	nucleobase-containing compound transport	19/692	241/18670	0.00167797	0.0294407	0.0248564	ABCD1/AGFG1/CKAP5/EIF5A/KHDRBS1/KIF5C/NUP133/NUP205/NUP85/NUP98/RBM8A/SEH1L/SLC25A4/SRSF4/SRSF7/SRSF9/THOC5/THOC6/UPF1	19
hsa01212	Fatty acid metabolism	9/403	57/8100	0.00183333	0.0305555	0.026267	ACADM/ACADVL/ACAT1/ACSL1/ACSL3/CBR4/ELOVL7/FASN/HSD17B8	9
GO:0006614	SRP-dependent cotranslational protein targeting to membrane	11/692	105/18670	0.00176917	0.0308167	0.0260181	RPL10A/RPL17/RPL18A/RPL22/RPL24/RPL30/RPL36/RPS10/RPS15A/RPS23/RPS24	11
GO:1902750	negative regulation of cell cycle G2/M phase transition	11/692	105/18670	0.00176917	0.0308167	0.0260181	BLM/PSMA8/PSMB1/PSMB7/PSMC2/PSMC6/PSMD11/PSMD2/PSMD5/PSMD9/PSME1	11
GO:0034113	heterotypic cell-cell adhesion	8/692	61/18670	0.00177731	0.0308471	0.0260438	ADIPOQ/CD44/CD58/ITGA7/ITGAV/MADCAM1/PKP2/SIRPA	8
GO:0070646	protein modification by small protein removal	22/692	299/18670	0.00183345	0.0316756	0.0267433	COPS2/DDX58/EIF3F/FOXK1/GPS1/PSMA8/PSMB1/PSMB7/PSMC2/PSMC6/PSMD11/PSMD2/PSMD5/PSMD9/PSME1/SART3/TRIM21/UCHL3/USP14/USP39/USP48/USP9X	22
GO:0045898	regulation of RNA polymerase II transcription preinitiation complex assembly	4/692	15/18670	0.00184191	0.0316756	0.0267433	CAND1/HMGB1/PSMC2/PSMC6	4
GO:0009266	response to temperature stimulus	19/692	243/18670	0.00184474	0.0316756	0.0267433	ACADVL/ATP2B1/BAG2/DNAJA1/DNAJC3/HSP90AA1/HSPA13/HSPA1A/HSPA1B/HSPH1/NOS1/NUP133/NUP205/NUP85/NUP98/RBM3/SEH1L/TGFB1I1/YBX3	19
GO:0007160	cell-matrix adhesion	18/692	225/18670	0.00186882	0.0319754	0.0269964	ANGPTL3/CD44/CD63/CDK6/COL3A1/FBLN5/FN1/ITGA7/ITGAL/ITGAV/LAMA5/MADCAM1/NRP1/POSTN/PTK2/RAC1/SDC4/THBS3	18
GO:0034314	Arp2/3 complex-mediated actin nucleation	6/692	36/18670	0.00191109	0.0324232	0.0273745	ARPC1B/CORO1B/CTNNA2/CYFIP1/GMFB/GMFG	6
GO:0016999	antibiotic metabolic process	12/692	122/18670	0.00192187	0.0324232	0.0273745	AKR1C2/AKR1C3/ALDH5A1/AMDHD2/CBR4/ESD/GPX1/HDAC6/MPO/RAC1/RAC2/SULT1B1	12
GO:0046031	ADP metabolic process	12/692	122/18670	0.00192187	0.0324232	0.0273745	AK4/AK5/FBP1/FOXK1/HK1/HK2/NUP133/NUP205/NUP85/NUP98/PSEN1/SEH1L	12
GO:0072599	establishment of protein localization to endoplasmic reticulum	12/692	122/18670	0.00192187	0.0324232	0.0273745	RAB3GAP1/RPL10A/RPL17/RPL18A/RPL22/RPL24/RPL30/RPL36/RPS10/RPS15A/RPS23/RPS24	12
GO:0019318	hexose metabolic process	19/692	244/18670	0.00193324	0.0325013	0.0274404	ADIPOQ/ALDH5A1/B4GALT1/DLAT/FBP1/FBP2/FOXK1/GALE/GALM/HK1/HK2/MAN2C1/MDH2/MPI/NLN/PDK1/PDK2/PDK4/SLC25A13	19
GO:0016197	endosomal transport	18/692	226/18670	0.00196242	0.0328774	0.027758	CHMP2A/CLTCL1/EHD1/GOSR2/MYO5B/RAB14/RAB7A/RAB8A/SNX2/SNX9/SQSTM1/TINAGL1/TOM1/UBE2O/VPS29/VPS36/VPS37B/VTI1B	18
hsa01200	Carbon metabolism	14/403	118/8100	0.00208621	0.0329401	0.0283169	ACAT1/CPS1/DLAT/ESD/FBP1/FBP2/GLUD1/GPT/HK1/HK2/MDH2/ME2/SDHA/SDHB	14
GO:0032461	positive regulation of protein oligomerization	5/692	25/18670	0.00197624	0.0329943	0.0278566	HDAC6/IDE/JCHAIN/RACK1/SNX9	5
GO:0032757	positive regulation of interleukin-8 production	7/692	49/18670	0.00206573	0.034134	0.0288189	ADIPOQ/CD58/DDX58/HSPA1A/HSPA1B/LGALS9/SYK	7
GO:0045010	actin nucleation	7/692	49/18670	0.00206573	0.034134	0.0288189	ARPC1B/CORO1B/CTNNA2/CYFIP1/GMFB/GMFG/VIL1	7
GO:0061912	selective autophagy	7/692	49/18670	0.00206573	0.034134	0.0288189	CALCOCO2/HDAC6/RAB7A/SQSTM1/TBK1/TSC2/UBQLN1	7
GO:0002831	regulation of response to biotic stimulus	27/692	400/18670	0.00209387	0.0344809	0.0291118	ARG1/CADM1/DDX58/DTX3L/ELMOD2/GRN/HMGB1/HMGB3/ICAM3/LGALS9/PRKCA/PSMA8/PSMB1/PSMB7/PSMC2/PSMC6/PSMD11/PSMD2/PSMD5/PSMD9/PSME1/RBM14/SAMHD1/SIN3A/SYK/TBK1/VAV1	27
GO:0072593	reactive oxygen species metabolic process	21/692	284/18670	0.00216921	0.0356002	0.0300568	ABCD1/AKR1C3/ATP2B4/CPS1/FBLN5/GPX1/HDAC6/HK2/HSP90AA1/MPO/NDUFA13/NOS1/P2RX4/PDK4/PON3/RAB27A/RAC1/RAC2/SIRPA/SYK/VAV1	21
hsa00190	Oxidative phosphorylation	15/403	133/8100	0.00243202	0.0356314	0.0306305	ATP4A/ATP5F1A/ATP5F1B/ATP5MF/ATP5PB/ATP6V0A1/ATP6V1E1/NDUFA13/NDUFA4/NDUFA9/PPA1/SDHA/SDHB/TCIRG1/UQCRQ	15
hsa05415	Diabetic cardiomyopathy	20/403	203/8100	0.00263136	0.0356314	0.0306305	ATP2A1/ATP5F1A/ATP5F1B/ATP5PB/COL1A2/COL3A1/MMP9/NDUFA13/NDUFA4/NDUFA9/PARP1/PDK2/PDK4/PRKCA/RAC1/RAC2/SDHA/SDHB/SLC25A4/UQCRQ	20
hsa04730	Long-term depression	9/403	60/8100	0.00264147	0.0356314	0.0306305	GNAZ/GUCY1B1/ITPR1/ITPR2/MAP2K1/MAP2K2/NOS1/PPP2R1A/PRKCA	9
hsa04810	Regulation of actin cytoskeleton	21/403	218/8100	0.00273174	0.0356314	0.0306305	ARHGAP35/ARHGEF12/ARHGEF6/ARPC1B/BCAR1/CRKL/CYFIP1/FN1/ITGA7/ITGAL/ITGAV/MAP2K1/MAP2K2/MYH14/NCKAP1L/PFN2/PTK2/RAC1/RAC2/RAC3/VAV1	21
GO:0097529	myeloid leukocyte migration	17/692	210/18670	0.00217888	0.0356377	0.0300884	CD9/HMGB1/MPP1/MST1L/NBL1/NCKAP1L/NUP85/P2RX4/PRTN3/RAC1/RAC2/SCG2/SIRPA/SWAP70/SYK/THBS4/VAV1	17
GO:0009206	purine ribonucleoside triphosphate biosynthetic process	8/692	63/18670	0.00219108	0.0356664	0.0301127	AK4/ATP5F1A/ATP5F1B/ATP5MF/ATP5PB/NME3/PARP1/SLC25A13	8
GO:0051084	'de novo' posttranslational protein folding	6/692	37/18670	0.00221061	0.0356664	0.0301127	CCT2/DNAJB12/HSPA13/HSPA1A/HSPA1B/HSPH1	6
GO:1900026	positive regulation of substrate adhesion-dependent cell spreading	6/692	37/18670	0.00221061	0.0356664	0.0301127	CARMIL1/CRKL/NRP1/OLFM4/RAC1/RAC3	6
GO:2000142	regulation of DNA-templated transcription, initiation	6/692	37/18670	0.00221061	0.0356664	0.0301127	CAND1/CTNNBIP1/GTF2B/HMGB1/PSMC2/PSMC6	6
GO:0060071	Wnt signaling pathway, planar cell polarity pathway	11/692	108/18670	0.0022176	0.0356664	0.0301127	PSMA8/PSMB1/PSMB7/PSMC2/PSMC6/PSMD11/PSMD2/PSMD5/PSMD9/PSME1/RAC1	11
GO:0022618	ribonucleoprotein complex assembly	18/692	229/18670	0.00226723	0.0361063	0.0304841	AGO3/CDC73/CLNS1A/EIF3A/EIF3F/EIF3L/EIF5/HSP90AA1/PRMT5/PRPF19/PWP2/RPL24/RPS10/RPS10P5/SART3/SF1/SRSF9/USP39	18
GO:0001738	morphogenesis of a polarized epithelium	13/692	141/18670	0.00227297	0.0361063	0.0304841	LAMA5/PSMA8/PSMB1/PSMB7/PSMC2/PSMC6/PSMD11/PSMD2/PSMD5/PSMD9/PSME1/RAC1/SLC9A3R1	13
GO:0001101	response to acid chemical	24/692	343/18670	0.00227489	0.0361063	0.0304841	ACSL1/ADIPOQ/AKR1C2/AKR1C3/APOB/ARG1/ATP2B4/CD9/COL1A2/COL3A1/COL6A1/CPS1/EEF2/FABP3/HNRNPD/IGF2R/MEAK7/NDUFA13/PDK4/SCGB1A1/SLC1A2/TNC/UFL1/YAP1	24
GO:0006913	nucleocytoplasmic transport	24/692	343/18670	0.00227489	0.0361063	0.0304841	AGFG1/ANP32D/EIF5A/HCLS1/KHDRBS1/NUP133/NUP205/NUP85/NUP98/PSEN1/RBM8A/RGPD1/RGPD2/SEH1L/SP100/SRSF4/SRSF7/SRSF9/SYK/THOC5/THOC6/TNPO3/TSC2/UPF1	24
GO:0021954	central nervous system neuron development	9/692	78/18670	0.00233257	0.0367799	0.0310528	ARHGAP35/CRKL/HSP90AA1/MYCBP2/NRP1/NRP2/PTK2/RAC3/UQCRQ	9
GO:0030433	ubiquitin-dependent ERAD pathway	9/692	78/18670	0.00233257	0.0367799	0.0310528	DNAJB12/DNAJC10/ERLEC1/FBXO6/HSPA13/PSMC6/SEL1L/UBQLN1/USP14	9
GO:1903203	regulation of oxidative stress-induced neuron death	5/692	26/18670	0.0023731	0.0370186	0.0312544	FBXO7/LANCL1/MEAK7/PARP1/RACK1	5
GO:0001732	formation of cytoplasmic translation initiation complex	4/692	16/18670	0.00238447	0.0370186	0.0312544	EIF3A/EIF3F/EIF3L/EIF5	4
GO:0048012	hepatocyte growth factor receptor signaling pathway	4/692	16/18670	0.00238447	0.0370186	0.0312544	BCAR1/HPN/NRP1/RAC1	4
GO:0061684	chaperone-mediated autophagy	4/692	16/18670	0.00238447	0.0370186	0.0312544	EEF1A1/EEF1A2/HSP90AA1/SYNPO2	4
GO:0009141	nucleoside triphosphate metabolic process	11/692	109/18670	0.00238607	0.0370186	0.0312544	AK4/AK5/ATP5F1A/ATP5F1B/ATP5MF/ATP5PB/CTPS1/NME3/PARP1/SAMHD1/SLC25A13	11
GO:0051168	nuclear export	16/692	194/18670	0.00240612	0.03721	0.0314159	AGFG1/EIF5A/KHDRBS1/NUP133/NUP205/NUP85/NUP98/RBM8A/SEH1L/SP100/SRSF4/SRSF7/SRSF9/THOC5/THOC6/UPF1	16
GO:0009145	purine nucleoside triphosphate biosynthetic process	8/692	64/18670	0.0024245	0.0373746	0.0315548	AK4/ATP5F1A/ATP5F1B/ATP5MF/ATP5PB/NME3/PARP1/SLC25A13	8
GO:0048009	insulin-like growth factor receptor signaling pathway	6/692	38/18670	0.00254419	0.0387819	0.032743	CILP/IGF2R/IGFBP1/IGFBP6/PHIP/TSC2	6
GO:0051169	nuclear transport	24/692	346/18670	0.0025467	0.0387819	0.032743	AGFG1/ANP32D/EIF5A/HCLS1/KHDRBS1/NUP133/NUP205/NUP85/NUP98/PSEN1/RBM8A/RGPD1/RGPD2/SEH1L/SP100/SRSF4/SRSF7/SRSF9/SYK/THOC5/THOC6/TNPO3/TSC2/UPF1	24
GO:0007032	endosome organization	9/692	79/18670	0.00254795	0.0387819	0.032743	CHMP2A/HOOK1/HOOK3/RAB27A/RAB7A/SQSTM1/VPS18/VPS36/VPS37B	9
GO:1903312	negative regulation of mRNA metabolic process	9/692	79/18670	0.00254795	0.0387819	0.032743	CCNT1/HNRNPD/PKP1/SRSF4/SRSF7/SRSF9/THRAP3/YBX1/YBX3	9
GO:0090175	regulation of establishment of planar polarity	11/692	110/18670	0.00256475	0.0389149	0.0328553	PSMA8/PSMB1/PSMB7/PSMC2/PSMC6/PSMD11/PSMD2/PSMD5/PSMD9/PSME1/RAC1	11
GO:0030048	actin filament-based movement	13/692	143/18670	0.00257379	0.0389295	0.0328677	ATP2A1/DLG1/MYH14/MYH2/MYH3/MYH4/MYH6/MYH7/MYH8/MYO1E/NEDD4L/PKP2/VIL1	13
GO:0045732	positive regulation of protein catabolic process	17/692	214/18670	0.00265467	0.0398652	0.0336576	BAG2/CUL4B/DDA1/HSP90AA1/HSPA1A/HSPA1B/IDE/NDUFA13/NEDD4L/NRDC/PSEN1/PSMC2/PTK2/RAB7A/RACK1/SNX9/UBQLN1	17
GO:0002685	regulation of leukocyte migration	16/692	196/18670	0.00266708	0.0398652	0.0336576	CD9/CRKL/DOCK8/HMGB1/LGALS9/MADCAM1/MPP1/MST1L/NBL1/NCKAP1L/OXSR1/P2RX4/RAC1/RAC2/SWAP70/THBS4	16
GO:0000381	regulation of alternative mRNA splicing, via spliceosome	8/692	65/18670	0.00267696	0.0398652	0.0336576	DDX17/KHDRBS1/RBM8A/SART3/SRSF4/SRSF7/SRSF9/THRAP3	8
GO:0051187	cofactor catabolic process	8/692	65/18670	0.00267696	0.0398652	0.0336576	ABCD1/ACAT1/CBR3/GGT2/GGT5/GPX1/HMOX2/MPO	8
GO:0072665	protein localization to vacuole	8/692	65/18670	0.00267696	0.0398652	0.0336576	GBP1/GOSR2/M6PR/MEAK7/RAB7A/VPS36/VPS37B/VTI1B	8
GO:0019058	viral life cycle	23/692	328/18670	0.00270433	0.0401297	0.033881	CCNK/CHMP2A/GRK2/HSPA1A/HSPA1B/IDE/ITGAV/LGALS9/MX1/NEDD4L/NUP133/NUP205/NUP85/NUP98/PDE12/PPIB/RAB7A/SEH1L/SMC3/TRIM21/VPS18/VPS37B/ZC3HAV1	23
GO:0035967	cellular response to topologically incorrect protein	14/692	161/18670	0.00271135	0.0401297	0.033881	ACADVL/CXXC1/DNAJB11/DNAJB12/DNAJC3/GOSR2/HDAC6/HSPA13/HSPA1A/HSPA1B/IGFBP1/PDIA6/RACK1/SSR1	14
GO:0048193	Golgi vesicle transport	25/692	368/18670	0.00276332	0.0407168	0.0343767	ACSL3/COG2/COPB1/COPG1/COPG2/CUX1/DOP1B/DYNC1LI1/EXOC1/GOLGA4/GOLGA5/GOSR2/KIF2A/LMAN1/PPP6R1/PROZ/RAB14/RAB8A/RACK1/SAR1B/SCYL1/SNX2/TMED7/TMED9/VTI1B	25
GO:0043462	regulation of ATPase activity	9/692	80/18670	0.00277879	0.0407168	0.0343767	ATP1B3/DNAJA1/DNAJB11/DNAJC10/MSH3/MYH6/PFN2/TOR1AIP1/UHRF1	9
GO:0140029	exocytic process	9/692	80/18670	0.00277879	0.0407168	0.0343767	NAPB/PSEN1/RAB8A/SNAP25/SNAP29/STX1A/SYK/VPS18/VTI1B	9
GO:0006611	protein export from nucleus	15/692	179/18670	0.00278478	0.0407168	0.0343767	AGFG1/EIF5A/NUP133/NUP205/NUP85/NUP98/RBM8A/SEH1L/SP100/SRSF4/SRSF7/SRSF9/THOC5/THOC6/UPF1	15
GO:0002026	regulation of the force of heart contraction	5/692	27/18670	0.00282483	0.0410536	0.034661	ATP2B4/GRK2/MYH6/MYH7/NOS1	5
GO:0036475	neuron death in response to oxidative stress	5/692	27/18670	0.00282483	0.0410536	0.034661	FBXO7/LANCL1/MEAK7/PARP1/RACK1	5
GO:0006909	phagocytosis	25/692	369/18670	0.00286359	0.041492	0.0350311	ADIPOQ/ARPC1B/CYFIP1/FCN2/HMGB1/HSP90AA1/ICAM3/IGHM/ITGAL/ITGAV/MYH2/NCKAP1L/PRTN3/PTK2/RAB14/RAB27A/RAB7A/RAC1/RAC3/RACK1/RAP1A/SIRPA/SIRPB1/SYK/VAV1	25
GO:0006119	oxidative phosphorylation	13/692	145/18670	0.00290644	0.0416172	0.0351369	ABCD1/AK4/ATP5F1A/ATP5F1B/ATP5MF/ATP5PB/NDUFA13/NDUFA4/NDUFA9/NIPSNAP2/PDE12/SDHA/UQCRQ	13
GO:0030049	muscle filament sliding	6/692	39/18670	0.00291417	0.0416172	0.0351369	MYH2/MYH3/MYH4/MYH6/MYH7/MYH8	6
GO:0033275	actin-myosin filament sliding	6/692	39/18670	0.00291417	0.0416172	0.0351369	MYH2/MYH3/MYH4/MYH6/MYH7/MYH8	6
GO:0042769	DNA damage response, detection of DNA damage	6/692	39/18670	0.00291417	0.0416172	0.0351369	CFAP410/CUL4B/DNAJA1/MRPS9/PARP1/PNKP	6
GO:0006754	ATP biosynthetic process	7/692	52/18670	0.00292399	0.0416172	0.0351369	AK4/ATP5F1A/ATP5F1B/ATP5MF/ATP5PB/PARP1/SLC25A13	7
GO:0031529	ruffle organization	7/692	52/18670	0.00292399	0.0416172	0.0351369	CARMIL1/CORO1B/CYFIP1/EPS8/FAM98A/PFN2/RAC1	7
GO:0006513	protein monoubiquitination	8/692	66/18670	0.00294947	0.0417569	0.0352548	CDC73/CUL4B/DTX3L/NEDD4L/PAF1/TRIM21/UBE2O/UHRF1	8
GO:0016052	carbohydrate catabolic process	16/692	198/18670	0.00295111	0.0417569	0.0352548	ABHD10/CTBS/FBP1/FOXK1/GALE/GALM/HK1/HK2/MAN2C1/NUDT5/NUP133/NUP205/NUP85/NUP98/PSEN1/SEH1L	16
GO:0043923	positive regulation by host of viral transcription	4/692	17/18670	0.00302761	0.0424658	0.0358533	CCNT1/GTF2B/HPN/SMARCA4	4
GO:0060263	regulation of respiratory burst	4/692	17/18670	0.00302761	0.0424658	0.0358533	GRN/JCHAIN/RAC1/RAC2	4
GO:0072673	lamellipodium morphogenesis	4/692	17/18670	0.00302761	0.0424658	0.0358533	CD44/CORO1B/SNX2/VIL1	4
GO:0050920	regulation of chemotaxis	17/692	217/18670	0.00306575	0.042876	0.0361997	CORO1B/HMGB1/LGALS9/MPP1/MST1L/MYCBP2/NBL1/NCKAP1L/NRP1/OXSR1/P2RX4/RAC1/RAC2/SCG2/SWAP70/THBS4/USP14	17
GO:0071826	ribonucleoprotein complex subunit organization	18/692	236/18670	0.0031356	0.0437262	0.0369175	AGO3/CDC73/CLNS1A/EIF3A/EIF3F/EIF3L/EIF5/HSP90AA1/PRMT5/PRPF19/PWP2/RPL24/RPS10/RPS10P5/SART3/SF1/SRSF9/USP39	18
GO:1901657	glycosyl compound metabolic process	12/692	130/18670	0.00326807	0.0454422	0.0383662	ABHD10/AK4/AKR1C2/AKR1C3/CBR4/DLG1/MPP1/NME3/NT5C/NT5E/PNP/TK2	12
GO:0009065	glutamine family amino acid catabolic process	5/692	28/18670	0.00333558	0.0461151	0.0389344	ARG1/ATP2B4/GLUD1/NOS1/PADI4	5
GO:0051123	RNA polymerase II preinitiation complex assembly	5/692	28/18670	0.00333558	0.0461151	0.0389344	CAND1/GTF2B/HMGB1/PSMC2/PSMC6	5
GO:0002688	regulation of leukocyte chemotaxis	11/692	114/18670	0.00339064	0.0467424	0.039464	HMGB1/LGALS9/MPP1/MST1L/NBL1/NCKAP1L/OXSR1/RAC1/RAC2/SWAP70/THBS4	11
GO:0031124	mRNA 3'-end processing	10/692	98/18670	0.00341518	0.0469466	0.0396364	CCNT1/CDC73/CSTF1/PAF1/RBM8A/SRSF4/SRSF7/SRSF9/THOC5/THOC6	10
GO:0033627	cell adhesion mediated by integrin	8/692	68/18670	0.00355896	0.0487841	0.0411877	CRKL/ITGAV/NCKAP1L/PODXL/PTK2/RAC3/SWAP70/SYK	8
GO:0009199	ribonucleoside triphosphate metabolic process	9/692	83/18670	0.0035718	0.0488213	0.0412192	AK4/ATP5F1A/ATP5F1B/ATP5MF/ATP5PB/CTPS1/NME3/PARP1/SLC25A13	9
GO:0050852	T cell receptor signaling pathway	16/692	202/18670	0.00359447	0.0489925	0.0413637	BCAR1/CRKL/GBP1/PSEN1/PSMA8/PSMB1/PSMB7/PSMC2/PSMC6/PSMD11/PSMD2/PSMD5/PSMD9/PSME1/TNFRSF21/UBE2N	16
GO:0030042	actin filament depolymerization	7/692	54/18670	0.00363215	0.0493665	0.0416795	CARMIL1/DSTN/EPS8/MICAL1/SWAP70/TMOD2/VIL1	7
GO:0072329	monocarboxylic acid catabolic process	12/692	132/18670	0.0037025	0.0501813	0.0423674	ABCD1/ACADM/ACADVL/ACAT1/ADIPOQ/ALDH5A1/CRAT/ECH1/ECI2/ETFDH/IVD/PON3	12
GO:0070371	ERK1 and ERK2 cascade	22/692	317/18670	0.00374242	0.0505804	0.0427043	ADIPOQ/AKAP12/CD44/CRKL/DLG1/EIF3A/FBLN1/FN1/GBP1/HMGB1/ITGAV/LGALS9/MAP2K1/MAP2K2/NRP1/PRKCA/PRMT5/RAP1A/RAP1B/SIRPA/SLC9A3R1/SYK	22
GO:0006458	'de novo' protein folding	6/692	41/18670	0.00377288	0.0507079	0.042812	CCT2/DNAJB12/HSPA13/HSPA1A/HSPA1B/HSPH1	6
GO:0050434	positive regulation of viral transcription	6/692	41/18670	0.00377288	0.0507079	0.042812	CCNT1/GTF2B/HPN/NELFA/POLR2H/SMARCA4	6
GO:0010390	histone monoubiquitination	5/692	29/18670	0.0039095	0.052253	0.0441166	CDC73/CUL4B/DTX3L/PAF1/UHRF1	5
GO:0042219	cellular modified amino acid catabolic process	5/692	29/18670	0.0039095	0.052253	0.0441166	ABHD12/BHMT/DMGDH/GGT2/GGT5	5
hsa04670	Leukocyte transendothelial migration	13/403	114/8100	0.00420638	0.0525798	0.0452002	ARHGAP35/BCAR1/CDH5/CTNNA2/ITGAL/MMP9/PRKCA/PTK2/RAC1/RAC2/RAP1A/RAP1B/VAV1	13
GO:0006576	cellular biogenic amine metabolic process	7/692	55/18670	0.00403168	0.0534419	0.0451203	AGMAT/ALDH7A1/BHMT/CHDH/DBH/DMGDH/SULT1B1	7
GO:0044273	sulfur compound catabolic process	7/692	55/18670	0.00403168	0.0534419	0.0451203	ABCD1/ACAT1/GGT2/GGT5/HEXA/OMD/PRELP	7
GO:0097120	receptor localization to synapse	7/692	55/18670	0.00403168	0.0534419	0.0451203	CLSTN1/DLG1/KIF5C/RAB8A/RAP1A/SNAP25/STX7	7
GO:0001666	response to hypoxia	24/692	359/18670	0.00406497	0.0537356	0.0453683	ADIPOQ/AGTRAP/AK4/CUL2/HK2/HMOX2/ITPR1/ITPR2/NOS1/PDK1/PLOD1/POSTN/PSMA8/PSMB1/PSMB7/PSMC2/PSMC6/PSMD11/PSMD2/PSMD5/PSMD9/PSME1/S100B/UBQLN1	24
HALLMARK_EPITHELIAL_MESENCHYMAL_TRANSITION	HALLMARK_EPITHELIAL_MESENCHYMAL_TRANSITION	25/287	200/4383	0.00113838	0.054642	0.0467333	APLP1/CADM1/CALU/CD44/COL12A1/COL1A2/COL3A1/COMP/DPYSL3/FBLN1/FBLN5/FN1/ITGAV/MGP/NT5E/PCOLCE/PFN2/PLOD1/POSTN/PPIB/QSOX1/SCG2/SDC4/THBS2/TNC	25
GO:0007006	mitochondrial membrane organization	12/692	134/18670	0.00418226	0.0551063	0.0465255	APOOL/ATP5F1A/ATP5F1B/ATP5MF/ATP5PB/HK2/HSP90AA1/HSPA1A/HSPA4/NDUFA13/SAMM50/TIMM10	12
GO:0009144	purine nucleoside triphosphate metabolic process	9/692	85/18670	0.00419217	0.0551063	0.0465255	AK4/ATP5F1A/ATP5F1B/ATP5MF/ATP5PB/NME3/PARP1/SAMHD1/SLC25A13	9
GO:0038095	Fc-epsilon receptor signaling pathway	14/692	169/18670	0.00420292	0.0551063	0.0465255	NFATC2/PSMA8/PSMB1/PSMB7/PSMC2/PSMC6/PSMD11/PSMD2/PSMD5/PSMD9/PSME1/RAC1/SYK/VAV1	14
GO:0034504	protein localization to nucleus	19/692	262/18670	0.00425211	0.0556001	0.0469424	CCT2/CCT6A/CD2AP/DTX3L/HCLS1/NUP133/NUP85/NUP98/PAF1/PARP1/PSEN1/RGPD1/RGPD2/SIN3A/SP100/SYK/TNPO3/TOR1AIP1/TSC2	19
GO:0051656	establishment of organelle localization	26/692	401/18670	0.00428211	0.055841	0.0471458	CDC23/CHMP2A/COPG1/COPG2/DLG1/FES/GOSR2/HOOK3/KIF1A/KIF1B/KIF5C/LGALS9/LMAN1/NEFL/PDCD10/PPP6R1/PSEN1/PTK2/RAB27A/RAC2/SAR1B/SEH1L/SLC9A3R1/SNAP29/SYK/TMED9	26
hsa00071	Fatty acid degradation	7/403	43/8100	0.00487937	0.056043	0.0481773	ACADM/ACADVL/ACAT1/ACSL1/ACSL3/ALDH7A1/ECI2	7
hsa03013	RNA transport	18/403	186/8100	0.00509853	0.056043	0.0481773	CLNS1A/CYFIP1/EEF1A1/EEF1A2/EIF3A/EIF3F/EIF5/FXR2/NUP133/NUP205/NUP85/NUP98/PRMT5/RBM8A/SEH1L/THOC5/THOC6/UPF1	18
hsa00051	Fructose and mannose metabolism	6/403	33/8100	0.00515314	0.056043	0.0481773	FBP1/FBP2/FCSK/HK1/HK2/MPI	6
hsa05010	Alzheimer disease	30/403	369/8100	0.00523068	0.056043	0.0481773	ATP2A1/ATP5F1A/ATP5F1B/ATP5PB/IDE/ITPR1/ITPR2/KIF5C/MAP2K1/MAP2K2/NDUFA13/NDUFA4/NDUFA9/NOS1/PSEN1/PSMA8/PSMB1/PSMB7/PSMC2/PSMC6/PSMD11/PSMD2/PSMD9/SDHA/SDHB/SLC25A4/TUBB1/TUBB3/TUBB8/UQCRQ	30
GO:0071375	cellular response to peptide hormone stimulus	22/692	321/18670	0.00433989	0.056442	0.0476532	ADIPOQ/AGTRAP/ARG1/ATP2B1/ATP6V0A1/ATP6V1E1/BCAR1/CPS1/CYFIP1/IDE/IGFBP1/MZB1/PARP1/PDK2/PDK4/PHIP/PTK2/RAB8A/RAP1B/STAT5B/TCIRG1/TSC2	22
GO:0010948	negative regulation of cell cycle process	24/692	361/18670	0.00435514	0.0564881	0.0476921	ATRX/BLM/BUB3/CBX3/CCNK/CDC73/CDK6/CHMP2A/CNOT1/DYNC1LI1/FBXO7/PRMT1/PSMA8/PSMB1/PSMB7/PSMC2/PSMC6/PSMD11/PSMD2/PSMD5/PSMD9/PSME1/RBM14/SMC3	24
GO:0045047	protein targeting to ER	11/692	118/18670	0.0044172	0.0571394	0.048242	RPL10A/RPL17/RPL18A/RPL22/RPL24/RPL30/RPL36/RPS10/RPS15A/RPS23/RPS24	11
GO:0070542	response to fatty acid	9/692	86/18670	0.00453232	0.0583968	0.0493037	ACSL1/ADIPOQ/AKR1C2/AKR1C3/APOB/CPS1/FABP3/PDK4/TNC	9
GO:0016579	protein deubiquitination	20/692	283/18670	0.00454807	0.0583968	0.0493037	DDX58/EIF3F/FOXK1/PSMA8/PSMB1/PSMB7/PSMC2/PSMC6/PSMD11/PSMD2/PSMD5/PSMD9/PSME1/SART3/TRIM21/UCHL3/USP14/USP39/USP48/USP9X	20
GO:0090022	regulation of neutrophil chemotaxis	5/692	30/18670	0.00455071	0.0583968	0.0493037	MPP1/NCKAP1L/RAC1/RAC2/THBS4	5
GO:0051017	actin filament bundle assembly	13/692	153/18670	0.00460568	0.0589454	0.0497668	ARHGEF10L/CARMIL1/CORO1B/DPYSL3/EPS8/FSCN1/NRP1/PFN2/RAC1/SDC4/SWAP70/SYNPO2/VIL1	13
GO:0016082	synaptic vesicle priming	4/692	19/18670	0.00464905	0.0590523	0.0498571	NAPB/SNAP25/SNAP29/STX1A	4
GO:1990182	exosomal secretion	4/692	19/18670	0.00464905	0.0590523	0.0498571	CHMP2A/RAB27A/RAB7A/SDC4	4
GO:1901292	nucleoside phosphate catabolic process	8/692	71/18670	0.00465075	0.0590523	0.0498571	ABCD1/ACAT1/GPX1/NT5C/NT5E/NUDT5/PNP/SAMHD1	8

## Sheet: Gene_group_3
ID	Description	GeneRatio	BgRatio	pvalue	p.adjust	qvalue	geneID	Count	Sumer	Sumer_score
GO:0043312	neutrophil degranulation	25/194	485/18670	4.33909e-11	5.39186e-08	4.63459e-08	AMPD3/ANXA3/APRT/CTSD/CTSZ/GSTP1/GYG1/HSPA6/IDH1/LTF/MGAM/MIF/PPBP/PSMD13/PSMD6/RAB10/S100A11/S100A12/S100A8/S100A9/S100P/SERPINB1/SIGLEC14/TXNDC5/VAMP8	25	sumer	7.33399
GO:0002283	neutrophil activation involved in immune response	25/194	488/18670	4.94836e-11	5.39186e-08	4.63459e-08	AMPD3/ANXA3/APRT/CTSD/CTSZ/GSTP1/GYG1/HSPA6/IDH1/LTF/MGAM/MIF/PPBP/PSMD13/PSMD6/RAB10/S100A11/S100A12/S100A8/S100A9/S100P/SERPINB1/SIGLEC14/TXNDC5/VAMP8	25	sumer	7.33399
GO:0042119	neutrophil activation	25/194	498/18670	7.61333e-11	5.39186e-08	4.63459e-08	AMPD3/ANXA3/APRT/CTSD/CTSZ/GSTP1/GYG1/HSPA6/IDH1/LTF/MGAM/MIF/PPBP/PSMD13/PSMD6/RAB10/S100A11/S100A12/S100A8/S100A9/S100P/SERPINB1/SIGLEC14/TXNDC5/VAMP8	25	sumer	7.33399
GO:0002446	neutrophil mediated immunity	25/194	499/18670	7.94382e-11	5.39186e-08	4.63459e-08	AMPD3/ANXA3/APRT/CTSD/CTSZ/GSTP1/GYG1/HSPA6/IDH1/LTF/MGAM/MIF/PPBP/PSMD13/PSMD6/RAB10/S100A11/S100A12/S100A8/S100A9/S100P/SERPINB1/SIGLEC14/TXNDC5/VAMP8	25	sumer	7.33399
GO:0051092	positive regulation of NF-kappaB transcription factor activity	12/194	149/18670	5.16613e-08	2.80521e-05	2.41122e-05	LTF/MALT1/MTPN/NFKB2/RPS27A/RPS3/S100A12/S100A8/S100A9/UBA52/UBB/UBC	12	sumer	4.61776
GO:0035722	interleukin-12-mediated signaling pathway	7/194	47/18670	5.19336e-07	0.000235	0.000201994	CAPZA1/CFL1/HNRNPA2B1/LCP1/MIF/PDCD4/SOD2	7	sumer	3.69466
GO:0051091	positive regulation of DNA-binding transcription factor activity	14/194	261/18670	6.22518e-07	0.000236545	0.000203323	ANXA3/LTF/MALT1/MTPN/NFKB2/RPS27A/RPS3/S100A12/S100A8/S100A9/STK3/UBA52/UBB/UBC	14	sumer	3.69181
GO:0071349	cellular response to interleukin-12	7/194	49/18670	6.97003e-07	0.000236545	0.000203323	CAPZA1/CFL1/HNRNPA2B1/LCP1/MIF/PDCD4/SOD2	7	sumer	3.69181
GO:0070671	response to interleukin-12	7/194	50/18670	8.03392e-07	0.000242357	0.000208318	CAPZA1/CFL1/HNRNPA2B1/LCP1/MIF/PDCD4/SOD2	7	sumer	3.68127
GO:0009620	response to fungus	7/194	52/18670	1.05735e-06	0.000287071	0.000246753	GAPDH/LTF/MALT1/RARRES2/S100A12/S100A8/S100A9	7	sumer	3.60774
GO:0061077	chaperone-mediated protein folding	7/194	59/18670	2.5358e-06	0.000625882	0.000537978	CSNK2A1/HSPA1L/HSPA2/HSPA5/HSPA6/HSPA7/SGTA	7	sumer	3.26924
hsa04137	Mitophagy - animal	8/111	68/8100	3.60325e-06	0.00060895	0.000542385	CSNK2A1/CSNK2A3/RPS27A/RRAS2/TBC1D15/UBA52/UBB/UBC	8	sumer	3.26569
GO:0000715	nucleotide-excision repair, DNA damage recognition	5/194	23/18670	3.32506e-06	0.000646299	0.000555528	COPS3/RPS27A/UBA52/UBB/UBC	5	sumer	3.25529
GO:0042026	protein refolding	6/194	40/18670	3.33267e-06	0.000646299	0.000555528	DNAJA2/HSPA1L/HSPA2/HSPA5/HSPA6/HSPA7	6	sumer	3.25529
GO:0050832	defense response to fungus	6/194	40/18670	3.33267e-06	0.000646299	0.000555528	GAPDH/LTF/RARRES2/S100A12/S100A8/S100A9	6	sumer	3.25529
GO:0051090	regulation of DNA-binding transcription factor activity	16/194	432/18670	1.21239e-05	0.00219443	0.00188623	ANXA3/ITCH/LTF/MALT1/MTPN/NFKB2/RNF2/RPS27A/RPS3/S100A12/S100A8/S100A9/STK3/UBA52/UBB/UBC	16	sumer	2.72441
GO:0061418	regulation of transcription from RNA polymerase II promoter in response to hypoxia	7/194	77/18670	1.52697e-05	0.00259108	0.00222717	PSMA1/PSMD13/PSMD6/RPS27A/UBA52/UBB/UBC	7	sumer	2.65225
hsa01200	Carbon metabolism	9/111	118/8100	3.16574e-05	0.00267505	0.00238264	ENO2/ENO3/GAPDH/IDH1/OGDHL/PCCB/PGAM4/PGD/PGK2	9	sumer	2.62294
GO:0051085	chaperone cofactor-dependent protein refolding	5/194	32/18670	1.84442e-05	0.00294565	0.00253194	HSPA1L/HSPA2/HSPA5/HSPA6/HSPA7	5	sumer	2.59655
GO:0031145	anaphase-promoting complex-dependent catabolic process	7/194	81/18670	2.13205e-05	0.00318199	0.00273509	PSMA1/PSMD13/PSMD6/RPS27A/UBA52/UBB/UBC	7	sumer	2.56303
GO:0002224	toll-like receptor signaling pathway	9/194	146/18670	2.22681e-05	0.00318199	0.00273509	CNPY3/LTF/PIK3C3/RPS27A/S100A8/S100A9/UBA52/UBB/UBC	9	sumer	2.56303
GO:0075733	intracellular transport of virus	6/194	57/18670	2.72127e-05	0.00369412	0.00317529	KPNA1/RPS27A/UBA52/UBB/UBC/XPO1	6	sumer	2.49822
GO:0070423	nucleotide-binding oligomerization domain containing signaling pathway	5/194	35/18670	2.89912e-05	0.00374815	0.00322173	ITCH/RPS27A/UBA52/UBB/UBC	5	sumer	2.49191
hsa01230	Biosynthesis of amino acids	7/111	75/8100	6.9161e-05	0.00389607	0.00347018	ACY1/ENO2/ENO3/GAPDH/IDH1/PGAM4/PGK2	7	sumer	2.45965
GO:0035872	nucleotide-binding domain, leucine rich repeat containing receptor signaling pathway	5/194	36/18670	3.33849e-05	0.00404458	0.00347653	ITCH/RPS27A/UBA52/UBB/UBC	5	sumer	2.45885
GO:0046794	transport of virus	6/194	60/18670	3.65862e-05	0.00404458	0.00347653	KPNA1/RPS27A/UBA52/UBB/UBC/XPO1	6	sumer	2.45885
GO:0051084	'de novo' posttranslational protein folding	5/194	37/18670	3.82776e-05	0.00404458	0.00347653	HSPA1L/HSPA2/HSPA5/HSPA6/HSPA7	5	sumer	2.45885
GO:0043618	regulation of transcription from RNA polymerase II promoter in response to stress	8/194	121/18670	3.88643e-05	0.00404458	0.00347653	HSPA5/PSMA1/PSMD13/PSMD6/RPS27A/UBA52/UBB/UBC	8	sumer	2.45885
GO:0044766	multi-organism transport	6/194	61/18670	4.02298e-05	0.00404458	0.00347653	KPNA1/RPS27A/UBA52/UBB/UBC/XPO1	6	sumer	2.45885
GO:1902579	multi-organism localization	6/194	61/18670	4.02298e-05	0.00404458	0.00347653	KPNA1/RPS27A/UBA52/UBB/UBC/XPO1	6	sumer	2.45885
GO:0002221	pattern recognition receptor signaling pathway	10/194	197/18670	4.17121e-05	0.00404458	0.00347653	CNPY3/ITCH/LTF/PIK3C3/RPS27A/S100A8/S100A9/UBA52/UBB/UBC	10	sumer	2.45885
GO:0019068	virion assembly	5/194	38/18670	4.37078e-05	0.00409195	0.00351725	DDX6/RPS27A/UBA52/UBB/UBC	5	sumer	2.4538
GO:0042276	error-prone translesion synthesis	4/194	20/18670	4.80687e-05	0.00420989	0.00361862	RPS27A/UBA52/UBB/UBC	4	sumer	2.44146
GO:0070987	error-free translesion synthesis	4/194	20/18670	4.80687e-05	0.00420989	0.00361862	RPS27A/UBA52/UBB/UBC	4	sumer	2.44146
GO:0042769	DNA damage response, detection of DNA damage	5/194	39/18670	4.97152e-05	0.00421802	0.00362561	RPS27A/RPS3/UBA52/UBB/UBC	5	sumer	2.44062
GO:0043620	regulation of DNA-templated transcription in response to stress	8/194	127/18670	5.4911e-05	0.00451768	0.00388318	HSPA5/PSMA1/PSMD13/PSMD6/RPS27A/UBA52/UBB/UBC	8	sumer	2.41081
GO:0006458	'de novo' protein folding	5/194	41/18670	6.36289e-05	0.00498916	0.00428844	HSPA1L/HSPA2/HSPA5/HSPA6/HSPA7	5	sumer	2.3677
GO:0032956	regulation of actin cytoskeleton organization	13/194	343/18670	6.43169e-05	0.00498916	0.00428844	ARF6/ARHGDIB/CAPZA1/CFL1/CFL2/CSF1R/FHOD1/ILK/MTPN/PFN1/PLEK/RHOC/TMSB10	13	sumer	2.3677
GO:0000717	nucleotide-excision repair, DNA duplex unwinding	4/194	22/18670	7.1403e-05	0.00526471	0.00452529	RPS27A/UBA52/UBB/UBC	4	sumer	2.34435
GO:0070646	protein modification by small protein removal	12/194	299/18670	7.17474e-05	0.00526471	0.00452529	COPS3/ITCH/PSMA1/PSMD13/PSMD6/RNF123/RPS27A/UBA52/UBB/UBC/UCHL1/USP5	12	sumer	2.34435
GO:0009135	purine nucleoside diphosphate metabolic process	8/194	134/18670	8.02542e-05	0.00558692	0.00480225	AMPD3/ENO2/ENO3/GAPDH/GUK1/OGDHL/PGAM4/PGK2	8	sumer	2.31855
GO:0009179	purine ribonucleoside diphosphate metabolic process	8/194	134/18670	8.02542e-05	0.00558692	0.00480225	AMPD3/ENO2/ENO3/GAPDH/GUK1/OGDHL/PGAM4/PGK2	8	sumer	2.31855
GO:0070498	interleukin-1-mediated signaling pathway	7/194	100/18670	8.31483e-05	0.00564369	0.00485105	PSMA1/PSMD13/PSMD6/RPS27A/UBA52/UBB/UBC	7	sumer	2.31416
GO:0006297	nucleotide-excision repair, DNA gap filling	4/194	23/18670	8.57352e-05	0.00567734	0.00487997	RPS27A/UBA52/UBB/UBC	4	sumer	2.31158
GO:0009185	ribonucleoside diphosphate metabolic process	8/194	136/18670	8.90578e-05	0.00575695	0.0049484	AMPD3/ENO2/ENO3/GAPDH/GUK1/OGDHL/PGAM4/PGK2	8	sumer	2.30554
hsa05132	Salmonella infection	12/111	249/8100	0.000144698	0.00611349	0.00544521	ARF6/CYFIP2/DCTN2/EXOC2/EXOC7/FHOD1/GAPDH/KPNA1/PFN1/PIK3C3/RPS3/TXN	12	sumer	2.26399
GO:0006402	mRNA catabolic process	13/194	364/18670	0.000116778	0.0073733	0.00633773	DDX6/NBAS/PSMA1/PSMD13/PSMD6/RNH1/RPS27A/RPS3/SKIV2L/UBA52/UBB/UBC/XPO1	13	sumer	2.19807
hsa05022	Pathways of neurodegeneration - multiple diseases	17/111	475/8100	0.000231659	0.00783008	0.00697416	CSNK2A1/CSNK2A3/DCTN2/FUS/GPX3/HSPA5/PIK3C3/PSMA1/PSMD13/PSMD6/RPS27A/SPG11/UBA52/UBB/UBC/UCHL1/VDAC2	17	sumer	2.15651
GO:0070911	global genome nucleotide-excision repair	4/194	26/18670	0.000141262	0.00871648	0.00749227	RPS27A/UBA52/UBB/UBC	4	sumer	2.12539
GO:0030834	regulation of actin filament depolymerization	5/194	51/18670	0.000183376	0.0110637	0.00950982	CAPZA1/CFL1/CFL2/MTPN/PLEK	5	sumer	2.02183
GO:0016579	protein deubiquitination	11/194	283/18670	0.000189951	0.0112113	0.00963666	ITCH/PSMA1/PSMD13/PSMD6/RNF123/RPS27A/UBA52/UBB/UBC/UCHL1/USP5	11
GO:0009132	nucleoside diphosphate metabolic process	8/194	154/18670	0.000210632	0.0118929	0.0102225	AMPD3/ENO2/ENO3/GAPDH/GUK1/OGDHL/PGAM4/PGK2	8
GO:0032970	regulation of actin filament-based process	13/194	388/18670	0.000218646	0.0118929	0.0102225	ARF6/ARHGDIB/CAPZA1/CFL1/CFL2/CSF1R/FHOD1/ILK/MTPN/PFN1/PLEK/RHOC/TMSB10	13
GO:0006294	nucleotide-excision repair, preincision complex assembly	4/194	29/18670	0.000219021	0.0118929	0.0102225	RPS27A/UBA52/UBB/UBC	4
GO:0035666	TRIF-dependent toll-like receptor signaling pathway	4/194	29/18670	0.000219021	0.0118929	0.0102225	RPS27A/UBA52/UBB/UBC	4
GO:0030042	actin filament depolymerization	5/194	54/18670	0.00024074	0.0126193	0.0108469	CAPZA1/CFL1/CFL2/MTPN/PLEK	5
GO:0061013	regulation of mRNA catabolic process	9/194	199/18670	0.000241695	0.0126193	0.0108469	NBAS/PSMA1/PSMD13/PSMD6/RPS27A/UBA52/UBB/UBC/XPO1	9
GO:0006401	RNA catabolic process	13/194	397/18670	0.000272893	0.0139793	0.012016	DDX6/NBAS/PSMA1/PSMD13/PSMD6/RNH1/RPS27A/RPS3/SKIV2L/UBA52/UBB/UBC/XPO1	13
GO:0019730	antimicrobial humoral response	7/194	122/18670	0.000287269	0.0141807	0.012189	GAPDH/LTF/PPBP/RARRES2/S100A12/S100A8/S100A9	7
GO:0046031	ADP metabolic process	7/194	122/18670	0.000287269	0.0141807	0.012189	AMPD3/ENO2/ENO3/GAPDH/OGDHL/PGAM4/PGK2	7
GO:1902903	regulation of supramolecular fiber organization	12/194	353/18670	0.000335059	0.0162444	0.0139629	AEBP1/ARF6/CAPZA1/CFL1/CFL2/FHOD1/MTPN/PFN1/PLEK/RHOC/RPS3/TMSB10	12
hsa05012	Parkinson disease	11/111	249/8100	0.000581689	0.0163843	0.0145933	HSPA5/PSMA1/PSMD13/PSMD6/RPS27A/TXN/UBA52/UBB/UBC/UCHL1/VDAC2	11
GO:0002756	MyD88-independent toll-like receptor signaling pathway	4/194	33/18670	0.000365302	0.0172992	0.0148696	RPS27A/UBA52/UBB/UBC	4
GO:0030836	positive regulation of actin filament depolymerization	3/194	14/18670	0.00036956	0.0172992	0.0148696	CFL1/CFL2/PLEK	3
GO:0007254	JNK cascade	9/194	214/18670	0.000412345	0.0188181	0.0161751	GSTP1/ITCH/PDCD4/RPS27A/RPS3/STK3/UBA52/UBB/UBC	9
GO:0110053	regulation of actin filament organization	10/194	261/18670	0.000415869	0.0188181	0.0161751	ARF6/CAPZA1/CFL1/CFL2/FHOD1/MTPN/PFN1/PLEK/RHOC/TMSB10	10
GO:0036294	cellular response to decreased oxygen levels	9/194	217/18670	0.000456222	0.0195417	0.0167971	DDAH1/NAMPT/PSMA1/PSMD13/PSMD6/RPS27A/UBA52/UBB/UBC	9
GO:0017014	protein nitrosylation	3/194	15/18670	0.000458423	0.0195417	0.0167971	GAPDH/S100A8/S100A9	3
GO:0018119	peptidyl-cysteine S-nitrosylation	3/194	15/18670	0.000458423	0.0195417	0.0167971	GAPDH/S100A8/S100A9	3
GO:0002753	cytoplasmic pattern recognition receptor signaling pathway	5/194	62/18670	0.000460651	0.0195417	0.0167971	ITCH/RPS27A/UBA52/UBB/UBC	5
GO:0046939	nucleotide phosphorylation	7/194	134/18670	0.000507159	0.0207974	0.0178765	ENO2/ENO3/GAPDH/GUK1/OGDHL/PGAM4/PGK2	7
GO:0002755	MyD88-dependent toll-like receptor signaling pathway	4/194	36/18670	0.000513233	0.0207974	0.0178765	RPS27A/UBA52/UBB/UBC	4
GO:0009167	purine ribonucleoside monophosphate metabolic process	4/194	36/18670	0.000513233	0.0207974	0.0178765	AMPD3/APRT/GUK1/PAICS	4
GO:0052548	regulation of endopeptidase activity	13/194	425/18670	0.000521129	0.0208069	0.0178846	A2M/CSNK2A1/CTSD/CYFIP2/GAPDH/LTF/MALT1/PZP/RPS3/S100A8/S100A9/SERPINB1/SERPINH1	13
GO:0043488	regulation of mRNA stability	8/194	177/18670	0.000536971	0.0211287	0.0181612	PSMA1/PSMD13/PSMD6/RPS27A/UBA52/UBB/UBC/XPO1	8
GO:0006296	nucleotide-excision repair, DNA incision, 5'-to lesion	4/194	37/18670	0.000570803	0.0215081	0.0184874	RPS27A/UBA52/UBB/UBC	4
GO:0009126	purine nucleoside monophosphate metabolic process	4/194	37/18670	0.000570803	0.0215081	0.0184874	AMPD3/APRT/GUK1/PAICS	4
GO:0043243	positive regulation of protein-containing complex disassembly	4/194	37/18670	0.000570803	0.0215081	0.0184874	CFL1/CFL2/PLEK/UVRAG	4
GO:0008064	regulation of actin polymerization or depolymerization	8/194	179/18670	0.000578304	0.0215081	0.0184874	ARF6/CAPZA1/CFL1/CFL2/MTPN/PFN1/PLEK/TMSB10	8
GO:0030832	regulation of actin filament length	8/194	180/18670	0.000599914	0.0220104	0.0189191	ARF6/CAPZA1/CFL1/CFL2/MTPN/PFN1/PLEK/TMSB10	8
GO:0051495	positive regulation of cytoskeleton organization	9/194	226/18670	0.000611463	0.0221349	0.0190261	ARF6/CFL1/CFL2/FHOD1/PFDN2/PFN1/PLEK/RHOC/RPS3	9
GO:0006457	protein folding	9/194	227/18670	0.000631099	0.0222898	0.0191593	CSNK2A1/DNAJA2/HSPA1L/HSPA2/HSPA5/HSPA6/HSPA7/PFDN2/SGTA	9
GO:0019058	viral life cycle	11/194	328/18670	0.000661438	0.0222898	0.0191593	DDX6/ITCH/KPNA1/LTF/RPS27A/UBA52/UBB/UBC/UVRAG/VAMP8/XPO1	11
GO:0038061	NIK/NF-kappaB signaling	8/194	183/18670	0.000668692	0.0222898	0.0191593	ILK/MALT1/NFKB2/PDCD4/PSMA1/PSMD13/PSMD6/RPS3	8
GO:0043487	regulation of RNA stability	8/194	183/18670	0.000668692	0.0222898	0.0191593	PSMA1/PSMD13/PSMD6/RPS27A/UBA52/UBB/UBC/XPO1	8
GO:0098869	cellular oxidant detoxification	6/194	102/18670	0.000686427	0.0222898	0.0191593	GPX3/GSR/GSTP1/S100A9/SOD2/TXN	6
GO:0033683	nucleotide-excision repair, DNA incision	4/194	39/18670	0.000699454	0.0222898	0.0191593	RPS27A/UBA52/UBB/UBC	4
GO:0006625	protein targeting to peroxisome	5/194	68/18670	0.000705728	0.0222898	0.0191593	IDH1/RPS27A/UBA52/UBB/UBC	5
GO:0072662	protein localization to peroxisome	5/194	68/18670	0.000705728	0.0222898	0.0191593	IDH1/RPS27A/UBA52/UBB/UBC	5
GO:0072663	establishment of protein localization to peroxisome	5/194	68/18670	0.000705728	0.0222898	0.0191593	IDH1/RPS27A/UBA52/UBB/UBC	5
GO:0006914	autophagy	14/194	496/18670	0.00070605	0.0222898	0.0191593	ATG4B/ATP6V1B1/CAMKK2/CSNK2A1/EIF4G2/EXOC7/GAPDH/NAMPT/PIK3C3/S100A8/S100A9/UCHL1/UVRAG/VAMP8	14
GO:0061919	process utilizing autophagic mechanism	14/194	496/18670	0.00070605	0.0222898	0.0191593	ATG4B/ATP6V1B1/CAMKK2/CSNK2A1/EIF4G2/EXOC7/GAPDH/NAMPT/PIK3C3/S100A8/S100A9/UCHL1/UVRAG/VAMP8	14
hsa00480	Glutathione metabolism	5/111	57/8100	0.00104861	0.0223396	0.0198976	GPX3/GSR/GSTP1/IDH1/PGD	5
hsa03040	Spliceosome	8/111	151/8100	0.0010575	0.0223396	0.0198976	DDX23/FUS/HNRNPA1L2/HSPA1L/HSPA2/HSPA6/PRPF4/U2SURP	8
GO:0071902	positive regulation of protein serine/threonine kinase activity	11/194	334/18670	0.000767583	0.0239539	0.0205896	CSF1R/ILK/LTF/MIF/RPS27A/RPS3/S100A12/STK3/UBA52/UBB/UBC	11
GO:0071453	cellular response to oxygen levels	9/194	234/18670	0.000783496	0.0241726	0.0207776	DDAH1/NAMPT/PSMA1/PSMD13/PSMD6/RPS27A/UBA52/UBB/UBC	9
GO:0007597	blood coagulation, intrinsic pathway	3/194	18/18670	0.000803473	0.0243085	0.0208944	A2M/GP1BA/GP5	3
GO:0043574	peroxisomal transport	5/194	70/18670	0.000805806	0.0243085	0.0208944	IDH1/RPS27A/UBA52/UBB/UBC	5
GO:0043405	regulation of MAP kinase activity	11/194	337/18670	0.000825745	0.0246362	0.0211761	GSTP1/ILK/MIF/PDCD4/RPS27A/RPS3/S100A12/UBA52/UBB/UBC/UCHL1	11
GO:0019985	translesion synthesis	4/194	41/18670	0.000847374	0.0250067	0.0214946	RPS27A/UBA52/UBB/UBC	4
GO:0070972	protein localization to endoplasmic reticulum	7/194	147/18670	0.000878738	0.0256535	0.0220505	HSPA5/RAB10/RPS27A/RPS3/SGTA/UBA52/UBAC2	7
GO:0032272	negative regulation of protein polymerization	5/194	72/18670	0.000916105	0.0263042	0.0226099	CAPZA1/MTPN/PFN1/TMSB10/VDAC2	5
GO:0052547	regulation of peptidase activity	13/194	452/18670	0.000920406	0.0263042	0.0226099	A2M/CSNK2A1/CTSD/CYFIP2/GAPDH/LTF/MALT1/PZP/RPS3/S100A8/S100A9/SERPINB1/SERPINH1	13
GO:0009127	purine nucleoside monophosphate biosynthetic process	3/194	19/18670	0.000946855	0.0265022	0.02278	AMPD3/APRT/PAICS	3
GO:0009168	purine ribonucleoside monophosphate biosynthetic process	3/194	19/18670	0.000946855	0.0265022	0.02278	AMPD3/APRT/PAICS	3
GO:0006283	transcription-coupled nucleotide-excision repair	5/194	73/18670	0.000975285	0.0267465	0.02299	COPS3/RPS27A/UBA52/UBB/UBC	5
GO:0061844	antimicrobial humoral immune response mediated by antimicrobial peptide	5/194	73/18670	0.000975285	0.0267465	0.02299	GAPDH/LTF/PPBP/S100A12/S100A9	5
GO:0006090	pyruvate metabolic process	7/194	150/18670	0.000989152	0.0268555	0.0230837	ENO2/ENO3/GAPDH/HAGH/OGDHL/PGAM4/PGK2	7
GO:0007015	actin filament organization	12/194	400/18670	0.00100698	0.0270689	0.0232671	ARF6/CAPZA1/CFL1/CFL2/FHOD1/LCP1/MTPN/PFN1/PLEK/PLS3/RHOC/TMSB10	12
GO:1901881	positive regulation of protein depolymerization	3/194	20/18670	0.00110546	0.0289539	0.0248874	CFL1/CFL2/PLEK	3
GO:0016052	carbohydrate catabolic process	8/194	198/18670	0.00111432	0.0289539	0.0248874	ENO2/ENO3/GAPDH/MGAM/OGDHL/PGAM4/PGD/PGK2	8
GO:0031099	regeneration	8/194	198/18670	0.00111432	0.0289539	0.0248874	ANXA1/ANXA3/ENO3/GSTP1/KLK6/LCP1/MATN2/MTPN	8
GO:1990748	cellular detoxification	6/194	112/18670	0.00111976	0.0289539	0.0248874	GPX3/GSR/GSTP1/S100A9/SOD2/TXN	6
GO:0006096	glycolytic process	6/194	113/18670	0.00117251	0.0294756	0.0253358	ENO2/ENO3/GAPDH/OGDHL/PGAM4/PGK2	6
GO:0035821	modulation of process of other organism	6/194	113/18670	0.00117251	0.0294756	0.0253358	CFL1/CSF1R/GAPDH/KPNA1/LTF/S100A9	6
GO:0043244	regulation of protein-containing complex disassembly	6/194	113/18670	0.00117251	0.0294756	0.0253358	CAPZA1/CFL1/CFL2/MTPN/PLEK/UVRAG	6
GO:0006757	ATP generation from ADP	6/194	114/18670	0.00122714	0.0305659	0.026273	ENO2/ENO3/GAPDH/OGDHL/PGAM4/PGK2	6
GO:1902905	positive regulation of supramolecular fiber organization	8/194	204/18670	0.00134824	0.033277	0.0286033	ARF6/CFL1/CFL2/FHOD1/PFN1/PLEK/RHOC/RPS3	8
GO:0070555	response to interleukin-1	8/194	207/18670	0.00147901	0.0355734	0.0305772	ANXA1/PSMA1/PSMD13/PSMD6/RPS27A/UBA52/UBB/UBC	8
GO:0071456	cellular response to hypoxia	8/194	207/18670	0.00147901	0.0355734	0.0305772	DDAH1/PSMA1/PSMD13/PSMD6/RPS27A/UBA52/UBB/UBC	8
GO:0043161	proteasome-mediated ubiquitin-dependent protein catabolic process	12/194	419/18670	0.00149348	0.0355734	0.0305772	HSPA5/ITCH/PSMA1/PSMD13/PSMD6/RPS27A/SGTA/UBA52/UBB/UBC/UCHL1/USP5	12
GO:0010498	proteasomal protein catabolic process	13/194	477/18670	0.00149369	0.0355734	0.0305772	HSPA5/ITCH/PSMA1/PSMD13/PSMD6/RPS27A/SGTA/UBA52/UBAC2/UBB/UBC/UCHL1/USP5	13
GO:0032392	DNA geometric change	6/194	119/18670	0.00153009	0.0361122	0.0310403	ANXA1/HNRNPA2B1/RPS27A/UBA52/UBB/UBC	6
GO:0007031	peroxisome organization	5/194	81/18670	0.00155622	0.0361122	0.0310403	IDH1/RPS27A/UBA52/UBB/UBC	5
GO:0030512	negative regulation of transforming growth factor beta receptor signaling pathway	5/194	81/18670	0.00155622	0.0361122	0.0310403	HSPA5/RPS27A/UBA52/UBB/UBC	5
GO:0008154	actin polymerization or depolymerization	8/194	209/18670	0.00157165	0.0361613	0.0310825	ARF6/CAPZA1/CFL1/CFL2/MTPN/PFN1/PLEK/TMSB10	8
GO:0097529	myeloid leukocyte migration	8/194	210/18670	0.00161966	0.0369528	0.0317629	ANXA1/DDT/MIF/PPBP/RARRES2/S100A12/S100A8/S100A9	8
GO:2001242	regulation of intrinsic apoptotic signaling pathway	7/194	165/18670	0.00171516	0.0383486	0.0329626	MIF/RPS3/S100A8/S100A9/SOD2/UBB/VDAC2	7
GO:1901879	regulation of protein depolymerization	5/194	83/18670	0.00173435	0.0383486	0.0329626	CAPZA1/CFL1/CFL2/MTPN/PLEK	5
GO:1903845	negative regulation of cellular response to transforming growth factor beta stimulus	5/194	83/18670	0.00173435	0.0383486	0.0329626	HSPA5/RPS27A/UBA52/UBB/UBC	5
GO:0072599	establishment of protein localization to endoplasmic reticulum	6/194	122/18670	0.00173734	0.0383486	0.0329626	HSPA5/RAB10/RPS27A/RPS3/SGTA/UBA52	6
GO:0009161	ribonucleoside monophosphate metabolic process	4/194	50/18670	0.001792	0.0391949	0.0336901	AMPD3/APRT/GUK1/PAICS	4
GO:0071621	granulocyte chemotaxis	6/194	123/18670	0.00181095	0.0391949	0.0336901	ANXA1/PPBP/RARRES2/S100A12/S100A8/S100A9	6
GO:0043254	regulation of protein-containing complex assembly	12/194	429/18670	0.00181899	0.0391949	0.0336901	ARF6/CAPZA1/LCP1/MMP1/MTPN/PFN1/PLEK/RHOC/RPS3/SELP/TMSB10/VDAC2	12
hsa00010	Glycolysis / Gluconeogenesis	5/111	67/8100	0.00217047	0.0407565	0.0363014	ENO2/ENO3/GAPDH/PGAM4/PGK2	5
GO:0000731	DNA synthesis involved in DNA repair	4/194	51/18670	0.00192891	0.0412361	0.0354446	RPS27A/UBA52/UBB/UBC	4
GO:0007249	I-kappaB kinase/NF-kappaB signaling	9/194	269/18670	0.00205864	0.0432914	0.0372112	GSTP1/LTF/MALT1/RHOC/RPS27A/S100A12/UBA52/UBB/UBC	9
GO:0006301	postreplication repair	4/194	52/18670	0.00207288	0.0432914	0.0372112	RPS27A/UBA52/UBB/UBC	4
GO:0031529	ruffle organization	4/194	52/18670	0.00207288	0.0432914	0.0372112	ARF6/CSF1R/PFN1/PLEK	4
GO:1903311	regulation of mRNA metabolic process	10/194	324/18670	0.00213618	0.0442728	0.0380548	HNRNPA2B1/NBAS/PSMA1/PSMD13/PSMD6/RPS27A/UBA52/UBB/UBC/XPO1	10
hsa04140	Autophagy - animal	7/111	137/8100	0.00267597	0.0452239	0.0402804	ATG4B/CAMKK2/CTSD/PIK3C3/RRAS2/UVRAG/VAMP8	7
GO:0002576	platelet degranulation	6/194	128/18670	0.00221507	0.0454021	0.0390255	A2M/ANXA5/PLEK/PPBP/RARRES2/SELP	6
GO:0036297	interstrand cross-link repair	4/194	53/18670	0.00222412	0.0454021	0.0390255	RPS27A/UBA52/UBB/UBC	4
GO:0032602	chemokine production	5/194	89/18670	0.00235862	0.0477885	0.0410767	CSF1R/GSTP1/MIF/S100A8/S100A9	5
GO:0002478	antigen processing and presentation of exogenous peptide antigen	7/194	175/18670	0.00239275	0.048003	0.0412611	CAPZA1/CTSD/DCTN2/PSMA1/PSMD13/PSMD6/VAMP8	7
GO:0010758	regulation of macrophage chemotaxis	3/194	26/18670	0.0024084	0.048003	0.0412611	DDT/MIF/RARRES2	3
GO:0030595	leukocyte chemotaxis	8/194	224/18670	0.00242225	0.048003	0.0412611	ANXA1/DDT/MIF/PPBP/RARRES2/S100A12/S100A8/S100A9	8
GO:0006986	response to unfolded protein	7/194	176/18670	0.00247043	0.0482534	0.0414763	HSPA1L/HSPA2/HSPA5/HSPA6/HSPA7/HSPB7/SERPINH1	7
GO:0009408	response to heat	7/194	176/18670	0.00247043	0.0482534	0.0414763	DNAJA2/HSBP1/HSPA1L/HSPA2/HSPA5/HSPA6/HSPA7	7
GO:0019882	antigen processing and presentation	8/194	226/18670	0.00255864	0.0496193	0.0426504	CAPZA1/CTSD/DCTN2/PSMA1/PSMD13/PSMD6/RAB10/VAMP8	8
GO:0006165	nucleoside diphosphate phosphorylation	6/194	132/18670	0.00258456	0.04962	0.042651	ENO2/ENO3/GAPDH/OGDHL/PGAM4/PGK2	6
GO:0046364	monosaccharide biosynthetic process	5/194	91/18670	0.00259897	0.04962	0.042651	ENO2/ENO3/GAPDH/PGD/PGK2	5
GO:0006735	NADH regeneration	3/194	27/18670	0.00268889	0.04962	0.042651	ENO2/ENO3/GAPDH	3
GO:0061621	canonical glycolysis	3/194	27/18670	0.00268889	0.04962	0.042651	ENO2/ENO3/GAPDH	3
GO:0061718	glucose catabolic process to pyruvate	3/194	27/18670	0.00268889	0.04962	0.042651	ENO2/ENO3/GAPDH	3
GO:0072376	protein activation cascade	3/194	27/18670	0.00268889	0.04962	0.042651	A2M/GP1BA/GP5	3
GO:0072378	blood coagulation, fibrin clot formation	3/194	27/18670	0.00268889	0.04962	0.042651	A2M/GP1BA/GP5	3
GO:0071347	cellular response to interleukin-1	7/194	179/18670	0.00271518	0.04962	0.042651	PSMA1/PSMD13/PSMD6/RPS27A/UBA52/UBB/UBC	7
GO:0006749	glutathione metabolic process	4/194	56/18670	0.00272316	0.04962	0.042651	GSR/GSTP1/HAGH/IDH1	4
GO:0019884	antigen processing and presentation of exogenous antigen	7/194	182/18670	0.00297815	0.053384	0.0458863	CAPZA1/CTSD/DCTN2/PSMA1/PSMD13/PSMD6/VAMP8	7
GO:0061615	glycolytic process through fructose-6-phosphate	3/194	28/18670	0.00298872	0.053384	0.0458863	ENO2/ENO3/GAPDH	3
GO:0061620	glycolytic process through glucose-6-phosphate	3/194	28/18670	0.00298872	0.053384	0.0458863	ENO2/ENO3/GAPDH	3
GO:0030837	negative regulation of actin filament polymerization	4/194	58/18670	0.00309544	0.0541147	0.0465144	CAPZA1/MTPN/PFN1/TMSB10	4
GO:0051403	stress-activated MAPK cascade	9/194	286/18670	0.00310177	0.0541147	0.0465144	GSTP1/ITCH/PDCD4/RPS27A/RPS3/STK3/UBA52/UBB/UBC	9
GO:0034605	cellular response to heat	6/194	137/18670	0.00310936	0.0541147	0.0465144	HSBP1/HSPA1L/HSPA2/HSPA5/HSPA6/HSPA7	6
GO:0098754	detoxification	6/194	137/18670	0.00310936	0.0541147	0.0465144	GPX3/GSR/GSTP1/S100A9/SOD2/TXN	6
GO:0032102	negative regulation of response to external stimulus	11/194	400/18670	0.00318288	0.0550415	0.0473111	A2M/ANXA5/DDT/GP1BA/GSTP1/ITCH/KANK2/LTF/MIF/PDCD4/PSMA1	11
GO:0015949	nucleobase-containing small molecule interconversion	3/194	29/18670	0.0033083	0.0568482	0.048864	GLRX/GSR/GUK1	3

## Sheet: Gene_group_4
ID	Description	GeneRatio	BgRatio	pvalue	p.adjust	qvalue	geneID	Count	Sumer	Sumer_score
GO:0008380	RNA splicing	65/962	469/18670	2.8516e-13	1.3431e-09	1.2517e-09	AAR2/BCAS2/CCAR1/CPSF2/CSTF3/CWF19L1/DDX47/DHX15/DHX16/ESRP1/FIP1L1/GTF2F1/HNRNPH3/HNRNPK/HNRNPR/HTATSF1/IK/IWS1/LSM5/LSM7/LUC7L/LUC7L3/MAGOH/MAGOHB/PAPOLA/PIK3R1/POLR2C/PPIE/PPIL1/PPP2CA/PQBP1/PRPF3/PRPF31/PRPF40A/PRPF4B/PTBP3/PUF60/QKI/RBM10/RBM15/RBM17/RBM39/RPS26/RRP1B/SART1/SMU1/SNRPA/SNRPC/SNRPG/SNRPGP15/SON/SRRM1/SRSF11/SRSF2/SRSF5/SRSF8/THOC2/THOC3/TMBIM6/TRA2A/TRA2B/USP4/WBP11/WDR77/ZNF3…	65	sumer	8.9025
GO:0022613	ribonucleoprotein complex biogenesis	60/962	468/18670	6.38231e-11	1.50303e-07	1.40075e-07	AAR2/BYSL/DDX3X/DDX47/DDX54/DHX30/DICER1/DIS3/EFL1/EIF2A/EIF2S2/EIF2S3/EIF2S3B/EIF3D/EIF3E/EIF3G/EIF3J/EIF3M/EIF4H/EMG1/GTPBP4/ISG20/LUC7L/LUC7L3/LYAR/NAT10/NOLC1/NOP2/NUP88/PA2G4/PDCD11/PES1/PIH1D1/PRPF3/PRPF31/PTGES3/RBFA/RNASEL/RPL11/RPL12/RPL26/RPL26L1/RPL35/RPL7A/RPS17/RPS27L/RPS28/RPS5/RRP1B/RRP9/RSL1D1/SART1/SNRPC/SNRPG/SNRPGP15/SRSF5/USP4/UTP25/WBP11/WDR77	60	sumer	6.85364
GO:0000377	RNA splicing, via transesterification reactions with bulged adenosine as nucleophile	51/962	379/18670	3.21692e-10	3.78792e-07	3.53014e-07	AAR2/BCAS2/CCAR1/CPSF2/CSTF3/CWF19L1/DHX15/DHX16/FIP1L1/GTF2F1/HNRNPH3/HNRNPK/HNRNPR/HTATSF1/IK/LSM5/LSM7/LUC7L/LUC7L3/MAGOH/MAGOHB/PAPOLA/POLR2C/PPIE/PPIL1/PQBP1/PRPF3/PRPF31/PRPF40A/PRPF4B/PUF60/RBM10/RBM15/RBM17/SART1/SMU1/SNRPA/SNRPC/SNRPG/SNRPGP15/SON/SRRM1/SRSF11/SRSF2/SRSF5/SRSF8/TRA2A/TRA2B/USP4/WBP11/WDR77	51	sumer	6.45221
GO:0000398	mRNA splicing, via spliceosome	51/962	379/18670	3.21692e-10	3.78792e-07	3.53014e-07	AAR2/BCAS2/CCAR1/CPSF2/CSTF3/CWF19L1/DHX15/DHX16/FIP1L1/GTF2F1/HNRNPH3/HNRNPK/HNRNPR/HTATSF1/IK/LSM5/LSM7/LUC7L/LUC7L3/MAGOH/MAGOHB/PAPOLA/POLR2C/PPIE/PPIL1/PQBP1/PRPF3/PRPF31/PRPF40A/PRPF4B/PUF60/RBM10/RBM15/RBM17/SART1/SMU1/SNRPA/SNRPC/SNRPG/SNRPGP15/SON/SRRM1/SRSF11/SRSF2/SRSF5/SRSF8/TRA2A/TRA2B/USP4/WBP11/WDR77	51	sumer	6.45221
GO:0000375	RNA splicing, via transesterification reactions	51/962	382/18670	4.26629e-10	4.01885e-07	3.74536e-07	AAR2/BCAS2/CCAR1/CPSF2/CSTF3/CWF19L1/DHX15/DHX16/FIP1L1/GTF2F1/HNRNPH3/HNRNPK/HNRNPR/HTATSF1/IK/LSM5/LSM7/LUC7L/LUC7L3/MAGOH/MAGOHB/PAPOLA/POLR2C/PPIE/PPIL1/PQBP1/PRPF3/PRPF31/PRPF40A/PRPF4B/PUF60/RBM10/RBM15/RBM17/SART1/SMU1/SNRPA/SNRPC/SNRPG/SNRPGP15/SON/SRRM1/SRSF11/SRSF2/SRSF5/SRSF8/TRA2A/TRA2B/USP4/WBP11/WDR77	51	sumer	6.42651
GO:0006413	translational initiation	32/962	193/18670	4.35206e-09	3.41637e-06	3.18387e-06	DDX3X/EIF1/EIF1B/EIF2A/EIF2B1/EIF2B4/EIF2S2/EIF2S3/EIF2S3B/EIF3D/EIF3E/EIF3G/EIF3J/EIF3M/EIF4E2/EIF4G1/EIF4H/RPL11/RPL12/RPL13/RPL15/RPL18/RPL26/RPL34/RPL35/RPL7A/RPS12/RPS17/RPS26/RPS28/RPS5/YTHDF1	32	sumer	5.49704
GO:0000413	protein peptidyl-prolyl isomerization	14/962	43/18670	1.63357e-08	1.01167e-05	9.42824e-06	FKBP10/FKBP15/FKBP2/FKBP7/PPIAL4A/PPIAL4C/PPIAL4D/PPIAL4E/PPIAL4F/PPIAL4G/PPIAL4H/PPIE/PPIF/PPIL1	14	sumer	5.02557
GO:0018208	peptidyl-proline modification	16/962	57/18670	1.71834e-08	1.01167e-05	9.42824e-06	CRTAP/FKBP10/FKBP15/FKBP2/FKBP7/P4HA2/PPIAL4A/PPIAL4C/PPIAL4D/PPIAL4E/PPIAL4F/PPIAL4G/PPIAL4H/PPIE/PPIF/PPIL1	16	sumer	5.02557
GO:0006401	RNA catabolic process	47/962	397/18670	9.28163e-08	4.85738e-05	4.52683e-05	AKT1/CNOT11/DIS3/EDC3/EIF3E/EIF4G1/HELZ2/HNRNPR/IGF2BP1/ISG20/LRPPRC/LSM5/LSM7/MAGOH/MAGOHB/MYEF2/POP1/PPP2CA/PRKCD/PSMB2/PSMD8/PSMF1/PYM1/RBM10/RNASEL/ROCK1/RPL11/RPL12/RPL13/RPL15/RPL18/RPL26/RPL34/RPL35/RPL7A/RPS12/RPS17/RPS26/RPS28/RPS5/SET/SSB/SUPV3L1/TBRG4/UPF2/WDR61/ZC3H14	47	sumer	4.34421
GO:0070972	protein localization to endoplasmic reticulum	25/962	147/18670	1.2738e-07	5.63417e-05	5.25075e-05	BCAP31/DDRGK1/KDELR2/LRRK2/PDIA2/PMM2/RAB3GAP2/RPL11/RPL12/RPL13/RPL15/RPL18/RPL26/RPL34/RPL35/RPL7A/RPS12/RPS17/RPS26/RPS28/RPS5/SEC61B/SEC62/SRP19/SRPRA	25	sumer	4.27978
GO:0006402	mRNA catabolic process	44/962	364/18670	1.31584e-07	5.63417e-05	5.25075e-05	AKT1/CNOT11/DIS3/EDC3/EIF3E/EIF4G1/HELZ2/HNRNPR/IGF2BP1/LSM5/LSM7/MAGOH/MAGOHB/MYEF2/PPP2CA/PRKCD/PSMB2/PSMD8/PSMF1/PYM1/RBM10/RNASEL/ROCK1/RPL11/RPL12/RPL13/RPL15/RPL18/RPL26/RPL34/RPL35/RPL7A/RPS12/RPS17/RPS26/RPS28/RPS5/SET/SSB/SUPV3L1/TBRG4/UPF2/WDR61/ZC3H14	44	sumer	4.27978
hsa03040	Spliceosome	28/514	151/8100	2.11977e-07	6.3805e-05	5.5114e-05	BCAS2/DHX15/DHX16/HNRNPK/LSM5/LSM7/MAGOH/MAGOHB/PPIE/PPIL1/PQBP1/PRPF3/PRPF31/PRPF40A/PUF60/RBM17/SART1/SNRPA/SNRPC/SNRPG/SRSF2/SRSF5/SRSF8/THOC2/THOC3/TRA2A/TRA2B/WBP11	28	sumer	4.25874
GO:0019080	viral gene expression	29/962	191/18670	1.65784e-07	6.23859e-05	5.81404e-05	AAAS/EIF3D/EIF3G/GTF2F1/HDAC1/NELFB/NUP210/NUP35/NUP37/NUP54/NUP62/NUP88/POLR2C/RPL11/RPL12/RPL13/RPL15/RPL18/RPL26/RPL34/RPL35/RPL7A/RPS12/RPS17/RPS26/RPS28/RPS5/RRP1B/SSB	29	sumer	4.23552
GO:0014037	Schwann cell differentiation	12/962	37/18670	1.83118e-07	6.23859e-05	5.81404e-05	AKT1/AKT2/ARHGEF10/CDK1/CNTNAP1/DICER1/GPC1/LAMA2/MPP5/MYOC/NF1/SIRT2	12	sumer	4.23552
GO:0000184	nuclear-transcribed mRNA catabolic process, nonsense-mediated decay	22/962	120/18670	1.85436e-07	6.23859e-05	5.81404e-05	EIF3E/EIF4G1/HELZ2/MAGOH/MAGOHB/PPP2CA/PYM1/RPL11/RPL12/RPL13/RPL15/RPL18/RPL26/RPL34/RPL35/RPL7A/RPS12/RPS17/RPS26/RPS28/RPS5/UPF2	22	sumer	4.23552
GO:0042254	ribosome biogenesis	38/962	297/18670	2.21973e-07	6.96996e-05	6.49564e-05	BYSL/DDX3X/DDX47/DDX54/DHX30/DIS3/EFL1/EIF2A/EMG1/GTPBP4/ISG20/LYAR/NAT10/NOLC1/NOP2/NUP88/PA2G4/PDCD11/PES1/PIH1D1/RBFA/RNASEL/RPL11/RPL12/RPL26/RPL26L1/RPL35/RPL7A/RPS17/RPS27L/RPS28/RPS5/RRP1B/RRP9/RSL1D1/SART1/UTP25/WBP11	38	sumer	4.18738
GO:0051028	mRNA transport	25/962	152/18670	2.47809e-07	7.29488e-05	6.79845e-05	AAAS/CPSF2/FIP1L1/G3BP2/IGF2BP1/IWS1/LRPPRC/MAGOH/MAGOHB/MX2/NUP210/NUP35/NUP37/NUP54/NUP62/NUP88/NXF1/QKI/SRRM1/SRSF11/SRSF2/SRSF5/THOC2/THOC3/UPF2	25	sumer	4.16759
GO:0071826	ribonucleoprotein complex subunit organization	32/962	236/18670	5.44408e-07	0.000147381	0.000137352	AAR2/DHX30/DICER1/EIF2S2/EIF2S3/EIF2S3B/EIF3D/EIF3E/EIF3G/EIF3J/EIF3M/EIF4H/KLC1/LUC7L/LUC7L3/NOP2/PIH1D1/PRPF3/PRPF31/PTGES3/RPL11/RPL12/RPS27L/RPS28/RPS5/SART1/SNRPC/SNRPG/SNRPGP15/SRSF5/USP4/WDR77	32	sumer	3.86217
GO:0071166	ribonucleoprotein complex localization	22/962	128/18670	5.93709e-07	0.000147381	0.000137352	AAAS/CPSF2/FIP1L1/IWS1/MAGOH/MAGOHB/NUP210/NUP35/NUP37/NUP54/NUP62/NUP88/NXF1/PRPF31/SRRM1/SRSF11/SRSF2/SRSF5/SSB/THOC2/THOC3/UPF2	22	sumer	3.86217
GO:0034470	ncRNA processing	44/962	384/18670	5.94532e-07	0.000147381	0.000137352	BYSL/C9orf64/DDX47/DDX54/DICER1/DIS3/ELAC2/ELP1/EMG1/GTPBP4/INTS2/INTS3/INTS4/INTS7/ISG20/KARS1/LYAR/NAT10/NOLC1/NOP2/PA2G4/PDCD11/PES1/PIH1D1/POP1/QTRT1/RBFA/RNASEL/RPL11/RPL26/RPL35/RPL7A/RPS17/RPS28/RRP1B/RRP9/RSL1D1/SART1/SSB/THUMPD3/TRMT10C/TRMT1L/UTP25/WBP11	44	sumer	3.86217
GO:0050657	nucleic acid transport	28/962	193/18670	6.98729e-07	0.000156715	0.00014605	AAAS/CPSF2/FIP1L1/G3BP2/IGF2BP1/IWS1/LRPPRC/MAGOH/MAGOHB/MX2/NUP210/NUP35/NUP37/NUP54/NUP62/NUP88/NXF1/PURA/QKI/SRRM1/SRSF11/SRSF2/SRSF5/SSB/THOC2/THOC3/TOMM20/UPF2	28	sumer	3.8355
GO:0022618	ribonucleoprotein complex assembly	31/962	229/18670	8.45662e-07	0.000173598	0.000161785	AAR2/DHX30/DICER1/EIF2S2/EIF2S3/EIF2S3B/EIF3D/EIF3E/EIF3G/EIF3J/EIF3M/EIF4H/LUC7L/LUC7L3/NOP2/PIH1D1/PRPF3/PRPF31/PTGES3/RPL11/RPL12/RPS27L/RPS28/RPS5/SART1/SNRPC/SNRPG/SNRPGP15/SRSF5/USP4/WDR77	31	sumer	3.79106
GO:0006406	mRNA export from nucleus	20/962	111/18670	8.84577e-07	0.000173598	0.000161785	AAAS/CPSF2/FIP1L1/IWS1/MAGOH/MAGOHB/NUP210/NUP35/NUP37/NUP54/NUP62/NUP88/NXF1/SRRM1/SRSF11/SRSF2/SRSF5/THOC2/THOC3/UPF2	20	sumer	3.79106
GO:0071427	mRNA-containing ribonucleoprotein complex export from nucleus	20/962	111/18670	8.84577e-07	0.000173598	0.000161785	AAAS/CPSF2/FIP1L1/IWS1/MAGOH/MAGOHB/NUP210/NUP35/NUP37/NUP54/NUP62/NUP88/NXF1/SRRM1/SRSF11/SRSF2/SRSF5/THOC2/THOC3/UPF2	20	sumer	3.79106
GO:0000956	nuclear-transcribed mRNA catabolic process	29/962	207/18670	9.30359e-07	0.000173803	0.000161975	CNOT11/DIS3/EDC3/EIF3E/EIF4G1/HELZ2/LSM5/LSM7/MAGOH/MAGOHB/PPP2CA/PYM1/RPL11/RPL12/RPL13/RPL15/RPL18/RPL26/RPL34/RPL35/RPL7A/RPS12/RPS17/RPS26/RPS28/RPS5/SSB/UPF2/WDR61	29	sumer	3.79055
GO:0051236	establishment of RNA localization	28/962	196/18670	9.5942e-07	0.000173803	0.000161975	AAAS/CPSF2/FIP1L1/G3BP2/IGF2BP1/IWS1/LRPPRC/MAGOH/MAGOHB/MX2/NUP210/NUP35/NUP37/NUP54/NUP62/NUP88/NXF1/PURA/QKI/SRRM1/SRSF11/SRSF2/SRSF5/SSB/THOC2/THOC3/TOMM20/UPF2	28	sumer	3.79055
GO:0031503	protein-containing complex localization	35/962	281/18670	1.24998e-06	0.000218053	0.000203214	AAAS/ADAM10/CPSF2/DLG3/DLG4/FIP1L1/GRIPAP1/HIP1/IFT27/IWS1/KIF5A/MAGOH/MAGOHB/MAPK10/NPTN/NUP210/NUP35/NUP37/NUP54/NUP62/NUP88/NXF1/PURA/RAB11A/SCRIB/SNAPIN/SRRM1/SRSF11/SRSF2/SRSF5/SSB/THOC2/THOC3/UPF2/WASL	35	sumer	3.69205
GO:0034660	ncRNA metabolic process	50/962	475/18670	1.33224e-06	0.000221142	0.000206093	AIMP1/BYSL/C9orf64/DARS2/DDX47/DDX54/DICER1/DIS3/ELAC2/ELP1/EMG1/GATB/GTPBP4/INTS2/INTS3/INTS4/INTS7/ISG20/KARS1/LARS2/LYAR/MARS1/NAT10/NOLC1/NOP2/PA2G4/PDCD11/PES1/PIH1D1/POP1/QTRT1/RBFA/RNASEL/RPL11/RPL26/RPL35/RPL7A/RPS17/RPS28/RRP1B/RRP9/RSL1D1/SART1/SSB/THUMPD3/TRMT10C/TRMT1L/UTP25/WBP11/YARS2	50	sumer	3.68594
GO:0019083	viral transcription	26/962	177/18670	1.3616e-06	0.000221142	0.000206093	AAAS/GTF2F1/HDAC1/NELFB/NUP210/NUP35/NUP37/NUP54/NUP62/NUP88/POLR2C/RPL11/RPL12/RPL13/RPL15/RPL18/RPL26/RPL34/RPL35/RPL7A/RPS12/RPS17/RPS26/RPS28/RPS5/RRP1B	26	sumer	3.68594
GO:0006364	rRNA processing	29/962	214/18670	1.85429e-06	0.000291124	0.000271312	BYSL/DDX47/DDX54/DIS3/EMG1/GTPBP4/ISG20/LYAR/NAT10/NOLC1/NOP2/PA2G4/PDCD11/PES1/PIH1D1/RBFA/RNASEL/RPL11/RPL26/RPL35/RPL7A/RPS17/RPS28/RRP1B/RRP9/RSL1D1/SART1/UTP25/WBP11	29	sumer	3.56653
GO:0071426	ribonucleoprotein complex export from nucleus	21/962	127/18670	2.04019e-06	0.000309977	0.000288882	AAAS/CPSF2/FIP1L1/IWS1/MAGOH/MAGOHB/NUP210/NUP35/NUP37/NUP54/NUP62/NUP88/NXF1/SRRM1/SRSF11/SRSF2/SRSF5/SSB/THOC2/THOC3/UPF2	21	sumer	3.53928
GO:0006913	nucleocytoplasmic transport	39/962	343/18670	3.11044e-06	0.000457818	0.000426662	AAAS/AKT1/ANP32B/CPSF2/CSE1L/EIF4ENIF1/FIP1L1/IWS1/KPNA2/KPNA3/KPNA4/LRRK2/LSG1/MAGOH/MAGOHB/MX2/NF1/NOLC1/NUP210/NUP35/NUP37/NUP54/NUP62/NUP88/NXF1/PIK3R1/PRKAG1/PRKCD/RGPD5/RGPD8/SNRPG/SRRM1/SRSF11/SRSF2/SRSF5/SSB/THOC2/THOC3/UPF2	39	sumer	3.36992
GO:0022011	myelination in peripheral nervous system	9/962	26/18670	3.47949e-06	0.000482012	0.00044921	AKT1/AKT2/ARHGEF10/CNTNAP1/DICER1/MPP5/MYOC/NF1/SIRT2	9	sumer	3.34755
GO:0032292	peripheral nervous system axon ensheathment	9/962	26/18670	3.47949e-06	0.000482012	0.00044921	AKT1/AKT2/ARHGEF10/CNTNAP1/DICER1/MPP5/MYOC/NF1/SIRT2	9	sumer	3.34755
HALLMARK_MYC_TARGETS_V1	HALLMARK_MYC_TARGETS_V1	34/345	200/4383	1.02069e-05	0.000500138	0.000461996	CUL1/DEK/DHX15/EIF2S2/EIF3D/EIF3J/EIF4H/HDDC2/HNRNPR/KARS1/KPNA2/LSM7/MRPL23/NOLC1/PA2G4/PRPF31/PSMB2/PSMD8/PTGES3/RPL18/RPL34/RPS5/RRM1/RRP9/RSL1D1/SET/SNRPA/SNRPG/SRM/SRSF2/SSB/TOMM70/TRA2B/VDAC3	34	sumer	3.33536
GO:0051169	nuclear transport	39/962	346/18670	3.84218e-06	0.000517048	0.000481862	AAAS/AKT1/ANP32B/CPSF2/CSE1L/EIF4ENIF1/FIP1L1/IWS1/KPNA2/KPNA3/KPNA4/LRRK2/LSG1/MAGOH/MAGOHB/MX2/NF1/NOLC1/NUP210/NUP35/NUP37/NUP54/NUP62/NUP88/NXF1/PIK3R1/PRKAG1/PRKCD/RGPD5/RGPD8/SNRPG/SRRM1/SRSF11/SRSF2/SRSF5/SSB/THOC2/THOC3/UPF2	39	sumer	3.31708
GO:0072599	establishment of protein localization to endoplasmic reticulum	20/962	122/18670	4.07126e-06	0.000532657	0.000496409	PMM2/RAB3GAP2/RPL11/RPL12/RPL13/RPL15/RPL18/RPL26/RPL34/RPL35/RPL7A/RPS12/RPS17/RPS26/RPS28/RPS5/SEC61B/SEC62/SRP19/SRPRA	20	sumer	3.30416
GO:0016072	rRNA metabolic process	29/962	225/18670	5.10558e-06	0.000649927	0.000605698	BYSL/DDX47/DDX54/DIS3/EMG1/GTPBP4/ISG20/LYAR/NAT10/NOLC1/NOP2/PA2G4/PDCD11/PES1/PIH1D1/RBFA/RNASEL/RPL11/RPL26/RPL35/RPL7A/RPS17/RPS28/RRP1B/RRP9/RSL1D1/SART1/UTP25/WBP11	29	sumer	3.21774
GO:0002183	cytoplasmic translational initiation	10/962	34/18670	5.31958e-06	0.000659348	0.000614478	EIF2S2/EIF2S3/EIF2S3B/EIF3D/EIF3E/EIF3G/EIF3J/EIF3M/EIF4G1/EIF4H	10	sumer	3.21149
GO:0006405	RNA export from nucleus	21/962	135/18670	5.55269e-06	0.000670594	0.000624959	AAAS/CPSF2/FIP1L1/IWS1/MAGOH/MAGOHB/NUP210/NUP35/NUP37/NUP54/NUP62/NUP88/NXF1/SRRM1/SRSF11/SRSF2/SRSF5/SSB/THOC2/THOC3/UPF2	21	sumer	3.20415
GO:0050658	RNA transport	28/962	193/18670	6.98729e-07	0.000156715	0.00014605	AAAS/CPSF2/FIP1L1/G3BP2/IGF2BP1/IWS1/LRPPRC/MAGOH/MAGOHB/MX2/NUP210/NUP35/NUP37/NUP54/NUP62/NUP88/NXF1/PURA/QKI/SRRM1/SRSF11/SRSF2/SRSF5/SSB/THOC2/THOC3/TOMM20/UPF2	28	sumer	3.1642
hsa03013	RNA transport	29/514	186/8100	5.27056e-06	0.00079322	0.000685173	AAAS/EIF1/EIF1B/EIF2B1/EIF2B4/EIF2S2/EIF2S3/EIF3D/EIF3E/EIF3G/EIF3J/EIF4E2/EIF4G1/ELAC2/MAGOH/MAGOHB/NUP210/NUP35/NUP37/NUP54/NUP62/NUP88/NXF1/POP1/PYM1/SRRM1/THOC2/THOC3/UPF2	29	sumer	3.1642
GO:0006403	RNA localization	29/962	230/18670	7.87849e-06	0.000927692	0.000864561	AAAS/CPSF2/FIP1L1/G3BP2/IGF2BP1/IWS1/LRPPRC/MAGOH/MAGOHB/MX2/NUP210/NUP35/NUP37/NUP54/NUP62/NUP88/NXF1/PIH1D1/PURA/QKI/SRRM1/SRSF11/SRSF2/SRSF5/SSB/THOC2/THOC3/TOMM20/UPF2	29	sumer	3.0632
GO:0045047	protein targeting to ER	19/962	118/18670	9.21275e-06	0.00105834	0.00098632	PMM2/RPL11/RPL12/RPL13/RPL15/RPL18/RPL26/RPL34/RPL35/RPL7A/RPS12/RPS17/RPS26/RPS28/RPS5/SEC61B/SEC62/SRP19/SRPRA	19	sumer	3.00598
GO:0014044	Schwann cell development	9/962	29/18670	9.69633e-06	0.00108737	0.00101338	AKT1/AKT2/ARHGEF10/CNTNAP1/DICER1/MPP5/MYOC/NF1/SIRT2	9	sumer	2.99423
GO:0006613	cotranslational protein targeting to membrane	18/962	109/18670	1.09901e-05	0.0012038	0.00112188	RPL11/RPL12/RPL13/RPL15/RPL18/RPL26/RPL34/RPL35/RPL7A/RPS12/RPS17/RPS26/RPS28/RPS5/SEC61B/SEC62/SRP19/SRPRA	18	sumer	2.95005
GO:0002181	cytoplasmic translation	17/962	100/18670	1.29115e-05	0.00138212	0.00128806	EIF2S2/EIF2S3/EIF2S3B/EIF3D/EIF3E/EIF3G/EIF3J/EIF3M/EIF4G1/EIF4H/RPL11/RPL15/RPL18/RPL26/RPL26L1/RPS26/RPS28	17	sumer	2.89006
GO:0006607	NLS-bearing protein import into nucleus	7/962	18/18670	1.81938e-05	0.00190428	0.00177469	KPNA2/KPNA3/KPNA4/NUP35/NUP54/RGPD5/RGPD8	7	sumer	2.75088
GO:0043484	regulation of RNA splicing	20/962	135/18670	1.93411e-05	0.00194327	0.00181103	ESRP1/HNRNPK/MAGOH/PIK3R1/PQBP1/PTBP3/RBM10/RBM15/RBM17/RPS26/RRP1B/SMU1/SON/SRSF2/SRSF5/SRSF8/TMBIM6/TRA2A/TRA2B/ZNF326	20	sumer	2.74208
GO:0015931	nucleobase-containing compound transport	29/962	241/18670	1.93914e-05	0.00194327	0.00181103	AAAS/CPSF2/FIP1L1/G3BP2/IGF2BP1/IWS1/LRPPRC/MAGOH/MAGOHB/MX2/NUP210/NUP35/NUP37/NUP54/NUP62/NUP88/NXF1/PURA/QKI/SLC25A31/SRRM1/SRSF11/SRSF2/SRSF5/SSB/THOC2/THOC3/TOMM20/UPF2	29	sumer	2.74208
GO:0006914	autophagy	48/962	496/18670	2.08651e-05	0.00200561	0.00186912	AKT1/ATG9A/ATP6V1C1/ATP6V1G1/ATP6V1H/BCL2/CD84/CTSA/EIF4G1/FNBP1L/FYCO1/GOLGA2/LAMTOR1/LAMTOR2/LRRK2/LRSAM1/MFN1/MTM1/NPRL3/PRKAA2/PRKAG1/RAB39A/RAB3GAP2/RMC1/ROCK1/RRAGB/SIRT2/SNAPIN/STAM2/STUB1/STX12/TIGAR/TMBIM6/TOMM20/TOMM70/TRAPPC8/TRIM22/TRIM5/UBQLN2/UBQLN4/USP10/VPS11/VPS13A/VPS16/VPS51/VTA1/ZFYVE1/ZMPSTE24	48	sumer	2.72836
GO:0061919	process utilizing autophagic mechanism	48/962	496/18670	2.08651e-05	0.00200561	0.00186912	AKT1/ATG9A/ATP6V1C1/ATP6V1G1/ATP6V1H/BCL2/CD84/CTSA/EIF4G1/FNBP1L/FYCO1/GOLGA2/LAMTOR1/LAMTOR2/LRRK2/LRSAM1/MFN1/MTM1/NPRL3/PRKAA2/PRKAG1/RAB39A/RAB3GAP2/RMC1/ROCK1/RRAGB/SIRT2/SNAPIN/STAM2/STUB1/STX12/TIGAR/TMBIM6/TOMM20/TOMM70/TRAPPC8/TRIM22/TRIM5/UBQLN2/UBQLN4/USP10/VPS11/VPS13A/VPS16/VPS51/VTA1/ZFYVE1/ZMPSTE24	48
GO:0051168	nuclear export	25/962	194/18670	2.24972e-05	0.00211923	0.00197501	AAAS/ANP32B/CPSF2/CSE1L/EIF4ENIF1/FIP1L1/IWS1/LSG1/MAGOH/MAGOHB/NUP210/NUP35/NUP37/NUP54/NUP62/NUP88/NXF1/SRRM1/SRSF11/SRSF2/SRSF5/SSB/THOC2/THOC3/UPF2	25
GO:0006614	SRP-dependent cotranslational protein targeting to membrane	17/962	105/18670	2.49822e-05	0.00230718	0.00215017	RPL11/RPL12/RPL13/RPL15/RPL18/RPL26/RPL34/RPL35/RPL7A/RPS12/RPS17/RPS26/RPS28/RPS5/SEC61B/SRP19/SRPRA	17
GO:0031123	RNA 3'-end processing	21/962	150/18670	2.89862e-05	0.00262548	0.00244681	CPSF2/CSTF3/ELAC2/FIP1L1/INTS2/INTS7/MAGOH/MAGOHB/PAPOLA/RNF40/SNRPA/SRRM1/SRSF11/SRSF2/SRSF5/SSB/SUPV3L1/THOC2/THOC3/TRMT10C/ZC3H14	21
GO:0006605	protein targeting	43/962	435/18670	3.37566e-05	0.00295167	0.0027508	ACAA1/ACOT8/ACOX2/ACOX3/AKT2/AMACR/BID/DECR2/LRRK2/NUP54/PAK1/PEX19/PEX5/PIPOX/PITRM1/PMM2/RAB8B/RABGEF1/RPL11/RPL12/RPL13/RPL15/RPL18/RPL26/RPL34/RPL35/RPL7A/RPS12/RPS17/RPS26/RPS28/RPS5/SAE1/SEC61B/SEC62/SRP19/SRPRA/TOMM20/TOMM34/TOMM70/TRAPPC8/VPS11/VPS13A	43
GO:0051186	cofactor metabolic process	44/962	449/18670	3.38408e-05	0.00295167	0.0027508	ACOT8/ACOT9/ACSL4/ACSL5/ACSM5/ADH4/AHCYL2/AKR1B1/AKR7A2/AKT1/ALDH1L1/ALDH1L2/BDH2/CIAO2A/COASY/COX2/CTRB1/CTRB2/DUOX1/DUOX2/FDXR/GCLC/GGH/GGTLC2/GGTLC3/GLRX3/GSTM1/GSTT1/HSD17B12/MRI1/MTHFD1L/MTHFD2/MTR/NADK2/NUBP2/PCCA/PDZD11/PIPOX/PPT1/PRDX1/QDPR/SCD/SLC25A1/SUCLG1	44
GO:0048193	Golgi vesicle transport	38/962	368/18670	3.73084e-05	0.00319495	0.00297753	ARF5/ARFGAP1/ARFGAP2/ARL1/ATP9A/BCAP31/COG6/COMMD1/CORO7/DYNC1LI2/EXOC6B/GOLGA2/KDELR2/KIF13A/KIF5A/KLC1/LLGL1/LRRK2/LYPLA1/MYO5A/PEF1/PITPNB/PPP6C/RAB6B/RAB8B/RINT1/SEC23IP/SPTBN2/SURF4/TMED2/TRAPPC11/TRAPPC5/TRAPPC8/VAPB/VPS13A/VPS35L/VPS51/YKT6	38
GO:0090150	establishment of protein localization to membrane	35/962	332/18670	4.89703e-05	0.00408511	0.00380711	AKT2/BAG6/BCL2/BID/GRIPAP1/KIF13A/LYPLA1/MAPK10/PAK1/PEX19/PEX5/RAB11A/RAB3GAP2/RAB8B/RABGEF1/RPL11/RPL12/RPL13/RPL15/RPL18/RPL26/RPL34/RPL35/RPL7A/RPS12/RPS17/RPS26/RPS28/RPS5/SCRIB/SEC61B/SEC62/SRP19/SRPRA/SYNE3	35
GO:0006611	protein export from nucleus	23/962	179/18670	4.94376e-05	0.00408511	0.00380711	AAAS/ANP32B/CPSF2/CSE1L/FIP1L1/IWS1/MAGOH/MAGOHB/NUP210/NUP35/NUP37/NUP54/NUP62/NUP88/NXF1/SRRM1/SRSF11/SRSF2/SRSF5/SSB/THOC2/THOC3/UPF2	23
GO:0044242	cellular lipid catabolic process	26/962	217/18670	5.52381e-05	0.00448572	0.00418045	AADAC/ACAA1/ACAD10/ACOT8/ACOX2/ACOX3/AIG1/AKT1/AKT2/AMACR/BDH2/DECR2/ECHDC1/FAAH/FABP6/INPP5F/MGLL/NAGA/PCCA/PDXDC1/PLCG1/PPT1/PRKCD/SIRT2/SMPD4/SMPDL3B	26
GO:0033540	fatty acid beta-oxidation using acyl-CoA oxidase	6/962	15/18670	6.17068e-05	0.00492608	0.00459085	ACAA1/ACOT8/ACOX2/ACOX3/AMACR/DECR2	6
GO:0051031	tRNA transport	9/962	36/18670	6.58146e-05	0.00516645	0.00481486	AAAS/NUP210/NUP35/NUP37/NUP54/NUP62/NUP88/SSB/TOMM20	9
GO:0007265	Ras protein signal transduction	43/962	448/18670	6.70851e-05	0.00517985	0.00482735	ARFGAP1/ARFGEF1/ARHGAP5/ARHGEF10/ARHGEF17/ARHGEF7/BCR/BRK1/CBL/CSF1/DNMT1/ELMO1/G3BP2/GNA13/IFT27/ITSN2/LPAR1/MAPK11/MYOC/NF1/NUP62/OGT/PECAM1/PPP2CB/PRAG1/RAB11A/RAB13/RAB15/RAB1C/RAB21/RAB25/RAB29/RAB32/RAB39A/RAB4A/RAB6B/RAB8B/RABGEF1/RAP2A/RAP2B/RAP2C/RASA1/ROCK1	43
GO:0051650	establishment of vesicle localization	23/962	184/18670	7.60916e-05	0.00578051	0.00538713	ARFGAP2/C17orf75/CLASP1/FAM91A1/FNBP1L/FYCO1/GOLGA2/KIF13A/KIF5A/LRRK2/MYO5A/PEF1/PPP6C/RAB11A/SCRIB/SEC23IP/SNAPIN/SYNJ1/TMED2/TRAPPC5/WASL/WDR11/YKT6	23
GO:0001732	formation of cytoplasmic translation initiation complex	6/962	16/18670	9.4433e-05	0.00705999	0.00657954	EIF2S2/EIF3D/EIF3E/EIF3G/EIF3J/EIF3M	6
hsa05132	Salmonella infection	32/514	249/8100	9.58015e-05	0.00770947	0.00665934	ABI1/ACBD3/AKT1/AKT2/ARL8B/BCL2/BRK1/CASP4/CASP5/CSE1L/DYNC1LI2/ELMO1/FLNC/FYCO1/GSDMD/IKBKB/KIF5A/KLC1/KPNA3/KPNA4/MAP2K4/MAP2K7/MAPK10/MAPK11/MAPK12/MAPK13/PAK1/S100A10/TUBB6/VPS11/VPS16/WASL	32
hsa05120	Epithelial cell signaling in Helicobacter pylori infection	14/514	70/8100	0.000102451	0.00770947	0.00665934	ADAM10/ATP6V1C1/ATP6V1G1/ATP6V1H/IKBKB/JAM2/MAP2K4/MAPK10/MAPK11/MAPK12/MAPK13/PAK1/PLCG1/PTPRZ1	14
GO:0007422	peripheral nervous system development	13/962	75/18670	0.000107691	0.00771296	0.00718807	AKT1/AKT2/ARHGEF10/CDK1/CNTNAP1/DICER1/GPC1/LAMA2/MPP5/MYOC/NF1/PLXNA4/SIRT2	13
[truncated: 56 more rows]

[truncated: 5 more sheets: Gene_group_5, Gene_group_6, Gene_group_7, Gene_group_8, Gene_group_9]
