# Supplementary material for: Plasma proteomic profiling of pan-cancer patients discovers biomarkers of cancers
Source: Research Square preprint supplement (doi:10.21203/rs.3.rs-939549/v1), 2021-10-05
Supplement: Supplementary file 5 [file b0d015686d118912397041c7.xlsx]

## Sheet: Description
Tab #	Name	Description
Tab 1	xCell signature	xCell Signature (Aran et al, 2016) based on global proteomic data.
Tab 2	Immune	Tumor Purity from TSNet (Petralia et al, 2018) and Immune and Stromal score from ESTIMATE (Yoshihara et al 2012) based on global proteomic data
Tab 3	Immune clusters	Immune clusters based on consensus clustering of 64 immune signatures derived from gene expression data.
Tab 4	Pathway (KEGG)	Pathway scores from GSVA(KEGG) based on global proteomic data
Tab 5	Pathway (Reactome)	Pathway scores from GSVA(Reactome) based on global proteomic data

## Sheet: xCell signature
xCell Signature (Aran et al, 2016) based on gene expression data.
	Exp079160	Exp081604	Exp081605	Exp081614	Exp082976	Exp087306	Exp087307	Exp087308	Exp087318	Exp087444	Exp087461	Exp087333	Exp087367	Exp087368	Exp087369	Exp087370	Exp087371	Exp087372	Exp087373	Exp087374	Exp087375	Exp087376	Exp087377	Exp087378	Exp087379	Exp087380	Exp087381	Exp087382	Exp087383	Exp087384	Exp087385	Exp087386	Exp087387	Exp087388	Exp087389	Exp087390	Exp087391	Exp087392	Exp087393	Exp087397	Exp087398	Exp087399	Exp087400	Exp087401	Exp087402	Exp087403	Exp087404	Exp087405	Exp087406
aDC	406.214	327.283	391.443	383.291	406.736	359.474	354.373	330.896	315.439	329.871	327.377	332.565	386.332	343.054	353.099	380.813	406.758	408.636	370.24	410.976	402.897	410.612	358.376	324.708	400.474	354.605	385.693	368.065	374.922	348.999	405.705	378.566	384.771	449.066	416.825	331.032	327.116	388.151	404.041	398.42	402.124	414.888	365.604	340.436	370.388	368.459	327.864	369.707	396.628
Adipocytes	178.099	406.868	406.201	533.171	581.346	233.112	308.107	339.669	418.175	267.215	380.149	408.847	371.966	609.922	581.014	471.521	430.708	506.13	403.899	376.649	286.098	532.863	444.182	345.412	513.937	283.001	596.731	473.421	475.652	278.678	492.38	423.199	403.155	566.128	396.91	515.616	444.395	594.455	496.826	569.517	518.768	471.585	560.7	473.963	356.889	478.627	427.724	583.982	445.507
Astrocytes	416.2	529.333	492.797	637.037	656.24	620.533	583.419	526.505	630.174	554.126	498.838	713.737	676.28	475.953	406.456	761.679	574.308	595.755	595.846	502.059	561.334	451.821	627.485	513.797	462.607	605.622	660.531	490.061	638.021	721.307	564.846	666.389	548.057	447.988	665.734	602.66	556.69	550.836	497.629	629.96	613.888	727.785	549.985	564.027	572.765	570.634	553.769	465.101	608.098
B-cells	613.782	743.559	712.248	675.667	738.344	594.484	697.861	633.303	661.479	549.484	528.91	340.83	280.666	236.799	371.437	362.755	357.625	400.65	310.837	357.703	308.86	309.021	280.385	327.059	379.422	297.906	330.822	360.655	340.552	272.396	291.08	265.906	291.361	318.546	348.58	255.513	255.447	251.377	360.538	343.023	339.51	303.527	340.247	315.048	301.014	179.36	248.403	371.184	297.911
Basophils	722.015	794.697	466.085	737.205	786.611	952.017	936.352	845.505	974.818	895.661	840.404	717.315	872.522	710.746	851.98	869.74	819.567	830.088	857.787	855.813	891.233	858.057	852.793	900.979	870.941	776.856	727.33	824.255	820.964	849.223	780.211	856.384	833.596	849.159	727.558	799.879	895.308	801.51	927.966	943.151	906.271	833.127	883.388	214.776	807.479	836.087	789.181	781.276	830.756
CD4+ memory T-cells	709.353	610.34	666.132	869.232	838.263	787.849	793.533	811.225	795.749	642.329	830.566	907.081	434.628	882.669	757.762	772.694	782.064	794.388	664.117	691	678.787	611.905	550.956	814.045	814.66	787.15	757.817	806.22	746.772	722.721	735.463	766.347	641.278	745.233	581.074	868.225	677.372	867.092	784.653	844.451	886.62	665.379	768.431	697.674	595.138	387.68	662.009	657.471	753.924
CD4+ naive T-cells	897.995	755.333	946.536	643.504	536.137	701.655	734.096	746.876	708.039	775.639	854.772	935.893	795.555	952.642	733.834	819.171	829.469	998.819	618.071	835.997	864.989	1302.88	739.5	1013.93	855.325	1008.16	826.781	872.968	765.303	771.917	843.542	861.987	875.47	786.31	757.2	869.831	951.684	935.44	891.631	904.452	788.574	668.767	899.243	915.331	721.593	863.814	772.774	903.935	1008.95
CD4+ T-cells	900.247	1013.86	1073.41	982.46	700.36	862.543	892.488	859.703	984.518	1062.95	872.478	1066.4	1073.24	1170.91	986.933	1022.06	959.898	1219.81	991.63	860.326	1118.71	1330.55	854.843	1095.77	1012	1243.64	1010.88	1009.29	964.269	1023.58	935.895	1017.52	1127.7	915.361	1103.24	1213.44	1107.37	1261.11	1012.73	1042.47	834.702	1041.71	1043.44	996.518	932.918	1075.63	1054.96	1159.46	1298.35
CD4+ Tcm	482.862	332.437	360.578	404.992	467.188	511.374	473.488	490.005	490.833	416.02	348.22	482.157	479.849	390.661	498.065	361.051	481.068	333.53	216.631	539.675	407.941	386.771	408.378	463.904	592.142	522.267	435.441	497.866	300.795	424.709	365.963	381.726	366.724	353.781	519.796	381.575	419.861	262.813	591.877	407.231	531.482	465.283	388.169	369.917	580.198	518.374	367.781	439.756	509.877
CD4+ Tem	385.829	434.554	439.893	423.593	348.421	388.304	442.583	529.689	464.391	371.546	397.697	603.077	707.911	573.271	672.142	602.381	536.501	572.661	505.399	775.949	582.86	742.66	652.479	647.311	903.181	804.201	899.598	662.508	504.11	761.85	640.231	578.719	556.39	783.73	719.556	675.3	773.255	485.498	774.616	647.375	663.012	832.112	596.322	557.073	704.158	690.666	635.953	678.653	744.43
CD8+ naive T-cells	680.796	762.051	826.257	864.213	443.353	769.979	651.511	749.374	795.812	684.308	791.405	349.165	447.883	98.7704	210.087	388.501	469.622	405.849	306.546	361.525	346.928	338.061	418.971	211.092	515.831	189.312	346.302	425.999	208.914	447.449	117.218	271.507	200.568	8.7141	650.993	277.004	507.634	232.162	429.654	410.466	450.911	278.917	335.547	285.783	372.141	262.411	198.787	558.687	483.976
CD8+ T-cells	898.142	1020.65	1138.5	1010.04	832.523	963.49	1033.8	1167.92	999.09	1000.86	825.433	564.797	527.511	414.572	609.586	549.909	686.292	650.845	458.931	671.498	547.585	710.409	551.02	732.258	696.034	527.188	514.035	380.43	591.881	675.373	581.71	489.267	349.302	654.49	434.49	654.392	702.127	647.79	583.033	539.559	468.384	377.478	588.419	596.505	569.921	678.104	681.703	665.186	605.922
CD8+ Tcm	647.49	776.919	931.767	901.769	839.539	796.862	982.987	1057.56	966.699	852.451	944.275	735.875	865.061	821.952	722.891	444.063	946.708	785.534	563.721	848.372	723.662	885.397	731.87	740.66	933.914	927.261	563.245	619.884	718.001	708.638	821.351	786.595	517.998	1015.35	799.01	916.334	782.782	863.198	681.708	698.51	821.336	767.51	407.225	752.591	830.395	977.102	950.315	922.732	898.415
CD8+ Tem	275.415	352.879	273.88	270.72	303.597	277.058	308.411	320.904	366.568	317.377	334.937	294.27	362.796	249.599	267.936	269.681	260.982	335.851	262.141	269.784	319.179	255.858	286.949	237.033	315.227	309.957	204.579	349.331	256.836	276.843	421.915	363.008	317.162	293.826	288.981	281.001	252.69	269.118	327.587	484.803	372.929	334.823	318.861	270.268	353.741	344.764	325.447	415.836	441.354
cDC	485.635	335.833	292.752	323.809	426.727	437.251	364.595	394.794	496.684	311.176	340.422	494.558	544.55	583.911	563.095	540.417	510.707	584.85	496.53	582.042	495.731	604.404	529.752	555.169	475.51	653.988	475.752	582.234	665.433	562.903	562.093	535.397	779.192	603.864	526.962	491.801	533.004	497.508	540.532	571.475	593.151	584.885	481.67	491.494	537.695	555.169	641.49	670.734	580.158
Chondrocytes	377.109	453.592	570.356	643.663	386.678	530.613	578.893	517.549	561.176	582.671	493.251	205.134	401.66	551.786	324.59	399.479	413.85	340.574	390.204	330.028	475.365	243.188	251.254	332.365	468.029	492.189	372.936	311.418	280.046	348.754	438.076	253.653	538.728	408.782	394.593	546.872	474.972	480.046	446.623	412.835	277.552	331.71	223.905	507.546	263.374	445.588	476.014	562.25	547.404
Class-switched memory B-cells	288.128	221.483	350.235	298.043	291.691	296.163	411.715	390.961	409.477	451.51	401.923	322.782	264.133	256.524	271.089	308.315	302.783	365.188	259.899	287.876	337.441	278.542	222.656	304.712	253.365	303.843	269.98	302.339	261.451	243.785	232.459	193.143	367.515	275.35	209.949	270.96	162.348	228.652	197.995	187.174	215.656	320.518	329.683	278.34	292.195	244.85	222.434	337.832	127.148
CLP	469.269	592.176	522.986	337.16	612.551	520.23	519.77	388.346	677.237	387.366	520.394	485.484	479.143	446.217	669.618	347.321	455.285	643.566	653.667	567.153	542.809	361.679	699.705	407.007	537.492	493.575	471.339	704.599	496.265	421.829	707.934	558.253	606.881	556.189	446.557	465.873	559.687	403.811	645.386	732.538	516.363	651.89	503.225	476.579	492.64	355.69	514.284	402.566	350.925
CMP	460.201	665.869	686.708	741.289	569.163	492.911	624.911	869.639	391.139	730.642	879.441	588.971	569.891	621.974	566.89	611.452	614.06	592.952	605.791	763.026	434.702	450.507	712.365	708.441	640.211	383.092	590.679	679.175	503.943	773.656	556.574	520.92	566.175	430.148	346.619	654.181	549.366	506.155	727.73	595.296	686.618	867.505	606.881	752.312	736.351	589.03	807.065	533.437	738.878
DC	852.103	390.926	573.505	629.964	513.333	495.307	593.449	683.708	677.371	456.3	770.61	675.742	764.542	770.363	729.975	634.144	805.107	693.181	654.127	583.627	647.594	647.2	234.444	692.602	741.469	854.949	677.704	757.249	667.838	812.022	700.524	686.981	790.158	637.892	664.156	676.564	700.38	675.046	664.52	977.238	581.391	724.188	734.431	621.283	705.637	886.655	750.181	691.955	795.413
Endothelial cells	739.489	620.555	705.571	599.218	718.576	753.749	780.446	653.018	820.527	765.166	574.071	447.208	317.655	674.119	606.587	513.964	410.336	595.558	627.215	554.543	497.354	401.15	368.344	603.171	566.056	362.479	687.282	570.155	645.151	369.486	498.196	409.103	693.331	574.504	402.957	498.16	415.569	417.482	588.894	334.191	413.074	430.957	378.928	465.212	484.337	600.791	380.595	441.945	575.544
Eosinophils	916.162	1084.96	954.664	856.027	746.836	1224.11	903.396	1137.82	880.406	913.049	576.859	946.715	668.756	1104.06	780.177	854.117	927.768	762.611	1169.39	1119.92	951.938	808.237	711.193	1012.71	1104.86	875.225	1042.4	1048.18	725.771	892.7	981.445	630.886	900.877	949.269	537.725	821.314	760.388	1005.57	893.697	761.651	813.937	706.04	1013.46	925.315	969.622	609.34	420.625	876.566	917.514
Epithelial cells	667.588	580.169	656.012	671.45	516.051	772.144	323.581	918.772	662.088	670.008	607.046	707.459	656.753	464.787	738.937	703.905	605.836	712.255	735.172	766.739	605.458	500.772	659.385	496.56	665.459	646.298	606.733	737.282	667.175	784.492	584.396	618.063	407.459	412.777	495.677	606.73	591.861	509.86	643.683	744.738	757.228	577.743	550.659	484.452	753.762	549.721	872.147	485.213	557.327
Erythrocytes	666.185	725.165	679.652	756.743	710.696	848.479	756.721	851.571	796.142	694.411	835.363	694.938	769.64	904.837	668.008	671.214	905.974	824.61	852.085	811.751	773.87	874.551	846.813	905.763	1018.54	811.639	838.803	894.692	738.64	697.613	717.513	812.274	764.284	943.237	799.713	769.552	824.116	767.811	802.203	402.067	875.999	761.891	726.222	659.739	659.065	774.293	762.528	784.442	684.212
Fibroblasts	371.054	390.381	424.643	523.167	557.799	486.618	479.929	436.028	376.503	429.293	460.845	238.996	239.456	379.384	322.116	364.467	350.887	353.362	299.138	307.04	333.202	245.701	291.366	394.331	422.849	452.85	420.313	484.844	335.734	256.384	261.517	322.092	430.211	407.777	330.647	449.804	394.173	284.37	398.051	367.344	338.023	343.701	329.444	385.269	344.87	339.881	330.222	315.999	408.529
GMP	417.038	502.753	542.572	521.914	244.93	487.608	490.213	511.342	326.806	439.309	298.926	434.451	361.002	502.22	526.731	440.218	486.103	407.958	459.604	493.715	219.946	430.447	429.483	480.313	437.259	329.01	461.519	519.374	297.963	419.299	493.922	456.593	436.801	422.805	283.626	354.65	345.486	465.214	482.052	390.257	474.476	496.999	518.86	450.944	495.528	470.981	355.016	465.826	410.075
Hepatocytes	132.14	178.337	145.065	181.033	157.081	145.301	155.725	128.454	183.809	127.675	172.261	179.12	162.46	169.429	182.886	177.013	178.864	153.837	180.005	176.828	154.021	152.532	167.906	159.023	166.757	171.604	195.771	159.369	187.537	171.963	183.801	166.465	195.721	166.952	158.325	169.646	188.596	184.151	152.664	196.362	180.987	178.417	204.518	174.276	174.747	193.169	151.493	166.658	139.664
HSC	579.55	398.664	705.088	507.149	516.401	638.673	491.932	855.849	451.338	918.662	672.395	364.692	563.58	284.945	623.611	211.16	510.507	768.701	332.661	748.594	710.734	304.009	223.043	804.798	352.416	669.625	753.305	549.89	746.125	541.009	317.436	521.998	514.185	534.705	421.769	667.644	487.181	308.448	545.466	173.366	445.399	354.832	310.654	274.603	742.966	314.323	480.7	96.9126	637.301
iDC	1153.04	335.528	554.424	542.279	514.029	523.203	553.959	764.066	743.606	477.274	724.511	596.646	761.15	719.542	604.136	552.361	831.285	598.573	548.576	660.29	540.008	542.314	209.102	580.988	683.074	995.227	581.801	710.102	615.751	935.927	678.689	584.794	859.959	534.758	531.883	563.321	569.061	524.022	615.024	1193.07	485.942	696.167	675.514	719	737.721	1033.33	834.371	765.435	767.679
Keratinocytes	380.564	330.899	350.437	226.308	364.643	349.347	173.796	416.008	384.693	403.602	337.325	332.082	457.541	350.746	443.239	460.111	376.929	542.898	418.082	425.408	432.516	401.872	461.862	439.526	488.003	446.851	464.65	417.722	384.406	463.66	503.001	424.538	418.104	264.222	271.454	406.459	366.086	399.049	476.957	476.036	472.328	461.094	414.684	342.778	422.314	438.839	522.285	321.604	490.603
ly Endothelial cells	858.478	647.647	726.214	726.214	770.226	881.662	1028.51	735.938	1095.34	939.055	815.169	748.562	597.489	1079.09	851.128	791.074	555.678	739.791	811.599	800.591	641.581	416.805	394.963	954.084	818.688	473.578	1098.6	810.608	1031.04	510.068	677.851	569.151	1042.16	903.314	589.753	859.904	607.579	530.792	790.346	496.605	634.946	651.432	628.025	655.269	749.07	889.721	495.397	689.065	726.466
Macrophages	360.024	455.97	417.697	459.046	399.133	361.862	514.713	394.824	388.4	327.884	447.052	493.78	237.696	320.458	446.064	392.249	482.571	464.455	213.514	213.142	428.789	464.972	482.816	441.964	370.046	428.067	426.496	434.889	461.389	384.271	388.991	419.867	425.74	407.268	463.65	402.056	419.244	400.706	399.409	362.012	391.583	418.15	317.008	212.997	414.517	399.066	320.059	221.62	416.904
Macrophages M1	438.914	588.747	654.857	621.577	617.266	497.374	572.216	562.327	586.655	463.776	612.049	595.621	321.262	279.758	472.057	510.001	474.511	594.095	292.491	278.987	430.822	572.092	457.65	510.38	485.042	532.713	463.646	493.532	581.533	417.095	443.354	544.82	448.357	587.197	421.559	582.927	441.752	429.104	478.507	425.306	618.46	462.887	324.753	258.984	463.764	480.98	435.352	430.034	568.947
Macrophages M2	632.837	691.334	562.632	639.667	618.065	517.017	669.969	522.178	373.907	623.243	630.462	699.312	566.551	601.295	579.766	581.898	709.197	694.689	455.74	441.671	631.895	736.734	578.077	732.047	667.059	556.701	719.697	606.332	689.972	556.982	546.734	629.599	613.032	525.004	684.627	543.852	722.731	696.097	692.705	730.709	552.8	576.484	636.408	508.431	733.01	707.574	600.156	509.821	582.273
Mast cells	361.724	286.361	312.273	347.355	296.658	279.822	354.908	347.388	210.361	385.805	356.063	397.025	344.679	245.069	354.883	457.913	315.076	294.496	360.623	413.837	260.948	291.097	356.563	339.461	313.242	231.274	193.108	284.392	431.868	327.494	322.818	372.737	321.812	281.319	349.94	343.438	372.359	291.601	338.463	306.489	335.228	337.242	295.164	291.117	371.351	477.748	426.888	384.804	457.519
Megakaryocytes	993.436	675.575	746.856	885.263	770.125	664.5	792.139	529.421	691.741	645.925	736.197	483.198	727.319	1003.65	752.6	724.455	529.691	794.674	778.298	559.708	738.077	736.024	684.144	723.034	761.472	724.84	754.104	548.671	916.698	649.962	867.93	856.416	917.437	640.58	682.159	669.246	913.423	768.267	858.182	913.461	689.305	1004.89	695.071	720.348	607.047	756.916	388.789	704.451	691.598
Melanocytes	540.205	684.314	591.281	608.302	586.614	750.176	707.124	677.957	619.639	730.439	752.063	557.322	615.849	416.429	602.277	548.036	450.001	622.645	495.998	558.317	769.626	535.761	485.69	552.05	628.897	602.342	696.171	496.443	615.693	442.869	428.118	442.874	596.803	511.444	451.218	317.21	428.677	464.952	380.377	441.105	545.762	521.978	585.892	294.713	567.882	509.897	582.54	348.127	612.733
Memory B-cells	563.662	716.418	806.261	723.747	533.797	808.44	700.902	807.687	541.448	678.708	599.339	423.714	226.524	371.311	438.143	454.077	401.721	440.006	414.965	401.027	423.587	388.863	340.38	406.15	431.033	406.92	418.566	378.618	444.355	412.558	395.47	421.957	469.48	457.43	355.178	359.738	374.475	387.644	391.812	402.016	379.122	320.124	371.593	401.446	356.104	407.664	192.792	439.37	304.727
MEP	443.281	503.518	686.607	533.424	508.499	613.884	610.511	523.733	614.35	555.116	502.33	435.773	518.923	343.735	804.665	548.073	650.74	745.265	551.525	511.66	539.641	670.787	515.469	641.926	635.355	610.303	657.421	555.103	635.849	580.716	634.477	568.251	543.846	505.667	527.983	585.018	489.17	514.752	707.416	494.683	675.173	749.316	574.674	486.037	749.221	594.753	576.805	596.438	568.119
Mesangial cells	310.843	395.122	319.142	370.384	431.399	536.468	548.088	543.138	534.696	379.221	429.862	454.577	296.726	430.621	295.695	495.67	458.186	399.035	398.459	393.973	304.951	363.046	375.296	254.796	262.24	351.893	445.216	323.075	457.408	395.075	366.733	292.799	454.261	274.592	269.29	436.199	496.369	352.633	307.377	349.314	410.704	347.126	303.881	277.286	339.819	396.32	250.774	386.559	379.142
Monocytes	343.713	545.703	370.059	474.229	586.501	524.882	549.647	612.67	602.006	494.029	374.782	459.53	626.049	616.097	620.184	614.903	452.678	479.744	585.844	639.791	533.856	511.144	532.222	547.709	491.039	687.102	562.753	440.402	446.478	635.044	413.39	383.591	564.408	559.407	356.074	423.764	545.434	453.848	496.278	546.23	501.609	578.13	613.97	379.495	469.512	532.155	555.837	590.222	556.431
MPP	340.162	395.133	421.848	386.947	317.757	376.48	328.235	404.772	280.101	370.163	353.881	480.755	444.009	389.249	399.802	411.985	380.847	411.951	432.107	476.793	286.412	346.657	402.997	455.577	408.215	195.894	347.702	407.811	220.882	406.213	490.264	389.035	378.197	394.851	259.212	400.889	414.748	434.619	431.868	417.375	430.231	471.728	455.821	426.515	469.661	472.1	404.281	390.986	424.59
MSC	740.312	935.855	1089.86	868.838	339.013	989.047	928.066	797.322	832.524	592.081	1159.32	980.924	1098.74	1056.76	881.628	956.637	795.941	769.781	1088.69	822.584	1005.46	900.873	1099.49	1009.01	758.208	1113.29	1114.28	862.506	957.597	857.02	1057.67	943.747	634.185	858.191	1211.77	880.396	848.269	876.874	947.518	738.108	678.223	931.115	835.884	1076.72	1139.9	1177.49	790.846	1166.16	1053.77
mv Endothelial cells	409.193	281.695	281.322	286.751	303.148	354.489	359.92	310.526	335.549	390.355	296.242	382.989	355.377	479.296	341.874	389.365	312.465	328.93	377.899	362.392	341.116	298.823	253.285	361.417	306.963	184.816	414.09	368.945	415.692	273.347	301.974	305.04	424.27	369.868	421.063	362.233	310.639	331.527	396.266	337.622	331.413	377.039	281.027	368.31	386.41	386.468	418.61	318.717	423.546
Myocytes	896.809	890.371	1248.36	1116.18	1255.3	1202.08	1259.68	1073.96	1061.25	1187.3	1138.06	913.889	857.746	871.191	835.264	790.573	885.939	713.181	886.695	664.528	794.021	638.353	946.672	1057.3	916.019	848.121	1015.61	1016	952.798	1069.42	796.105	995.95	1029.12	795.334	1021.73	936.785	824.22	954.34	920.717	930.658	823.003	986.149	926.26	993.047	919.167	912.551	1032.16	884.125	749.623
naive B-cells	460.601	443.431	499.984	471.031	554.367	471.04	473.119	500.792	363.124	546.028	413.194	443.865	387.897	388.093	433.799	522.283	398.477	510.474	422.261	359.245	459.728	485.35	563.4	446.889	526.177	413.089	349.066	376.152	380.098	456.706	434.476	415.018	433.349	417.101	393.068	453.198	425.744	386.032	474.969	527.865	553.858	441.339	474.071	575.131	496.155	343.957	431.21	408.142	464.861
Neurons	341.038	265.393	269.259	259.321	275.733	219.126	285.048	261.921	247.626	303.95	235.249	389.233	317.432	378.525	236.545	327.881	256.307	307.845	264.431	351.895	273.887	292.745	288.439	271.189	305.809	249.859	228.247	312.415	274.831	329.038	286.813	320.56	319.864	226.507	322.748	229.163	424.862	256.438	260.393	318.011	255.211	287.785	298.182	319.065	320.089	280.657	419.023	339.59	282.249
Neutrophils	961.365	992.066	895.178	887.448	899.878	1047.04	922.057	894.702	501.483	1037.94	894.202	1036.51	565.206	1147.38	1030.59	863.923	982.907	858.528	797.815	976.907	925.29	427.636	689.567	1108.32	1055.78	988.484	697.657	623.727	892.221	1085.86	1027.39	214.438	1026.16	976.841	803.148	838.483	812.437	671.37	975.791	689.477	921.386	866.235	940.116	1001.01	887.822	1104.16	1006.13	1036.1	847.488
NK cells	1142.12	794.389	960.407	802.891	685.453	791.223	746.283	927.206	656.804	893.81	739.452	834.358	699.606	823.357	697.73	571.077	676.849	951.257	538.617	396.581	608.047	593.56	359.809	669.749	759.285	641.017	550.598	657.119	432.398	738.026	960.487	680.461	476.96	478.42	732.799	653.506	741.699	645.878	476.193	473.758	830.628	1132.17	543.846	491.415	473.004	664.775	603.229	1228.89	1096.12
NKT	342.179	724.326	675.474	650.313	575.589	571.856	633.993	550.875	802.716	735.722	656.861	151.864	169.846	147.668	155.992	164.663	159.006	174.002	148.586	154.957	151.042	188.816	204.825	163.191	215.934	157.861	158.173	157.237	147.058	166.034	193.859	287.335	161.618	189.8	148.586	160.049	148.995	158.693	159.527	157.029	201.153	189.581	181.964	177.111	193.309	169.633	271.459	146.956	146.854
Osteoblast	487.51	462.451	527.561	485.529	401.431	502.128	512.373	349.423	353.193	559.839	465.462	493.298	436.25	522.172	355.974	422.664	436.058	400.613	402.89	535.726	522.361	543.022	534.526	532.442	632.666	346.958	416.515	497.812	552.641	295.087	506.851	408.178	464.509	619.465	610.735	574.118	593.809	513.163	472.967	411.107	488.571	491.618	404.962	580.524	433.251	483.316	519.194	492.887	534.633
pDC	667.552	799.111	607.624	1022.94	602.278	901.111	655.698	850.122	934.352	837.999	953.047	1001.34	1001.52	1034.41	865.89	969.304	530.927	946.675	1139.58	822.227	1071.35	824.123	778.528	899.671	849.589	880.494	1032.97	845.97	925.065	1007.53	857.392	844.675	829.392	587.824	641.452	1171.29	803.415	822.343	882.852	808.017	820.584	798.513	554.808	749.304	808.094	795.921	723.065	755.386	689.032
Pericytes	695.54	912.422	752.315	883.494	862.849	963.281	935.259	907.408	855.914	881.473	963.337	893.585	907.978	875.932	845.205	875.566	791.993	881.262	969.102	752.658	874.783	965.442	886.536	814.92	836.873	875.747	836.247	986.489	823.117	888.043	874.5	871.202	911.592	845.386	921.246	886.331	939.922	844.487	883.572	880.134	900.094	818.03	804.235	955.327	853.064	857.67	820.235	731.85	845.274
Plasma cells	1092.29	738.381	816.033	864.916	855.717	960.328	1010.19	828.594	788.293	738.224	1055.14	830.524	561.241	1035.15	812.208	733.971	872.899	921.276	986.836	915.176	1001.2	755.244	917.041	793.11	849.452	892.714	856.778	634.748	984.975	909.959	877.749	829.54	1034.32	995.019	847.115	985.568	976.348	726.156	800.453	816.754	702.755	863.575	807.368	907.926	837.59	828.586	941.858	783.138	612.761
Platelets	838.376	663.532	646.871	709.276	745.879	626.354	678.775	559.703	708.69	556.214	636.432	413.512	499.312	642.073	520.113	586.15	362.659	570.495	491.221	418.181	555.861	528.99	449.206	575.925	656.506	456.902	535.42	486.697	668.7	443.074	593.38	589.279	624.334	489.704	577.413	433.913	618.337	492.597	621.174	672.751	508.394	738.019	529.088	489.784	507.286	437.01	336.877	392.735	363.864
Preadipocytes	360.543	335.898	504.105	509.139	364.035	488.854	460.195	265.414	340.266	388.578	313.269	434.715	455.272	455.106	475.501	571.38	352.92	477.743	385.664	412.013	369.36	354.944	467.204	457.219	506.701	436.023	416.004	576.569	619.742	582.751	538.621	320.157	455.787	448.695	394.55	341.712	365.723	432.503	468.319	545.051	598.2	412.779	444.815	418.525	398.877	422.867	525.539	408.683	504.979
pro B-cells	454.943	399.565	477.301	502.161	501.406	502.004	425.73	446.622	525.763	448.947	419.73	669.835	687.659	743.009	708.351	617.63	736.356	679.571	790.61	701.687	498.631	781.383	772.021	702.193	770.402	783.606	738.496	845.058	751.155	710.807	697.097	586.366	863.237	730.048	725.517	837.206	759.455	607.657	765.641	749.248	823.983	725.482	877.824	802.658	737.337	830.7	778.129	600.298	719.778
Sebocytes	307.794	210.98	212.226	169.714	317.712	223.446	0	387.046	261.166	339.12	240.024	220.501	382.973	277.289	471.39	512.584	335.536	622.294	443.052	381.63	437.535	379.708	374.148	396.296	536.986	426.833	448.969	338.532	346.668	375.769	463.548	387.841	338.165	317.783	333.894	403.67	304.73	322.441	444.714	469.591	483.892	434.022	299.964	308.593	420.824	409.762	616.41	268.677	403.518
Skeletal muscle	765.397	845.722	889.747	638.08	874.128	895.652	969.706	913.992	1018.75	852.758	820.226	373.864	174.413	232.786	240.405	410.391	349.412	365.098	276.67	234.453	328.322	270.333	275.88	369.572	284.51	255.659	299.904	336.095	328.764	375.235	152.103	271.415	278.096	258.026	385.647	224.895	91.5748	355	342.572	203.187	239.283	329.053	204.302	335.074	220.79	300.695	241.379	258.048	286.161
Smooth muscle	301.49	360.752	379.199	469.261	379.737	460.22	512.313	492.895	418.919	387.767	388.214	398.38	436.921	417.059	443.956	425.538	468.449	396.424	455.47	421.746	463.525	340.278	502.97	488.015	413.972	482.581	537.536	381.679	532.03	563.605	502.516	476.488	539.067	448.749	521.533	426.352	537.775	462.683	479.176	482.013	444.715	419.633	493.125	356.866	366.404	513.221	481.422	381.067	542.738
Tgd cells	255.439	281.003	285.257	277.271	177.45	346.497	263.613	278.142	337.295	166.846	244.883	412.318	257.091	359.929	365.879	218.938	321.493	270.459	263.124	329.013	365.301	345.719	181.607	199.448	271.948	336.753	240.825	309.469	336.106	325.527	212.569	392.855	423.362	353.677	201.383	364.012	310.371	253.657	257.161	304.187	341.861	373.528	297.376	281.966	246.317	157.353	304.755	182.987	377.797
Th1 cells	527.211	822	598.774	524.352	573.622	560.624	642.488	839.819	457.063	798.488	814.359	694.295	966.178	895.183	602.451	554.09	694.926	532.824	723.726	776.102	917.327	712.652	518.302	644.101	763.006	863.271	864.839	367.175	387.685	551.139	602.721	474.333	550.349	457.334	687.259	652.598	665.646	617.661	693.466	507.506	928.561	645.584	856.188	568.993	732.44	894.227	807.114	650.699	604.165
Th2 cells	1640.45	1465.28	1778.01	1843.11	1566.81	1597.03	1536.67	1545.44	1351.67	1848.48	1698.47	1469.98	1658.75	1578.39	1405.3	1639.9	1363.45	1680.27	1609.82	1164.48	1453.19	745.8	1499.99	1700.04	1680.5	1846.41	1621.65	1666.92	1476.15	1638.42	1641.24	1590.22	1529.24	1440.5	1511.82	1696.38	1762.41	1483.98	1452.33	1654.39	1658.33	1746.39	1615.55	1750.32	1714.01	1689.42	1665.88	1606.64	1674.65
Tregs	1188.13	1352.21	1662.48	1649.6	1709.73	1232.8	1688.95	1337.89	1296.22	1723.97	1239.58	743.124	667.253	717.235	700.166	756.848	786.745	701.166	632.892	622.25	668.068	661.465	665.229	695.142	632.927	597.74	718.576	542.677	712.646	837.279	715.978	710.135	612.151	795.329	638.225	682.308	628.31	656.336	673.864	592.875	625.769	546.113	698.444	696.268	667.591	613.442	635.532	735.802	600.079
[truncated: 1,069 more columns]

## Sheet:  Immune
Immune score from ESTIMATE (Yoshihara et al 2012) based on global proteomic data
	Exp079160	Exp081604	Exp081605	Exp081614	Exp082976	Exp087306	Exp087307	Exp087308	Exp087318	Exp087444	Exp087461	Exp087333	Exp087367	Exp087368	Exp087369	Exp087370	Exp087371	Exp087372	Exp087373	Exp087374	Exp087375	Exp087376	Exp087377	Exp087378	Exp087379	Exp087380	Exp087381	Exp087382	Exp087383	Exp087384	Exp087385	Exp087386	Exp087387	Exp087388	Exp087389	Exp087390	Exp087391	Exp087392	Exp087393	Exp087397	Exp087398	Exp087399	Exp087400	Exp087401	Exp087402	Exp087403	Exp087404	Exp087405	Exp087406
ImmuneScore	341.795	342.439	239.083	292.877	312.26	302.938	260.33	408.81	336.277	298.325	324.481	122.231	301.836	263.7	216.06	250.982	213.695	185.873	251.048	151.54	101.955	171.716	260.014	227.29	208.912	183.282	200.852	256.201	199.384	214.978	291.014	219.704	137.686	225.852	199.922	219.366	203.525	323.579	302.978	289.94	160.481	273.216	305.573	255.38	148.447	155.171	230.595	222.631	290.84
[truncated: 1,069 more columns]

## Sheet: Immune clusters
Immune clusters based on consensus clustering of 64 immune signatures derived from gene expression data.
Sample ID	Subtype
Exp079160	IC1
Exp081604	IC1
Exp081605	IC1
Exp081614	IC1
Exp082976	IC1
Exp087306	IC1
Exp087307	IC1
Exp087308	IC1
Exp087318	IC1
Exp087444	IC1
Exp087461	IC1
Exp087333	IC1
Exp087367	IC1
Exp087368	IC1
Exp087369	IC1
Exp087370	IC1
Exp087371	IC1
Exp087372	IC1
Exp087373	IC1
Exp087374	IC1
Exp087375	IC1
Exp087376	IC1
Exp087377	IC1
Exp087378	IC1
Exp087379	IC1
Exp087380	IC1
Exp087381	IC1
Exp087382	IC1
Exp087383	IC1
Exp087384	IC1
Exp087385	IC1
Exp087386	IC1
Exp087387	IC1
Exp087388	IC1
Exp087389	IC1
Exp087390	IC1
Exp087391	IC1
Exp087392	IC1
Exp087393	IC1
Exp087397	IC1
Exp087398	IC1
Exp087399	IC1
Exp087400	IC1
Exp087401	IC1
Exp087402	IC1
Exp087403	IC1
Exp087404	IC1
Exp087405	IC1
Exp087406	IC1
Exp087407	IC1
Exp087408	IC1
Exp087409	IC1
Exp087410	IC1
Exp087411	IC1
Exp087412	IC1
Exp087413	IC1
Exp087414	IC1
Exp079138	IC2
Exp079161	IC2
Exp079171	IC2
Exp079237	IC2
Exp079269	IC2
Exp079271	IC2
Exp079278	IC2
Exp079295	IC2
Exp081466	IC2
Exp081608	IC2
Exp082943	IC2
Exp082988	IC2
Exp082990	IC2
Exp082992	IC2
Exp083917	IC2
Exp087309	IC2
Exp087331	IC2
Exp079151	IC3
Exp079172	IC3
Exp079231	IC3
Exp079232	IC3
Exp079235	IC3
Exp079280	IC3
Exp081478	IC3
Exp082752	IC3
Exp082753	IC3
Exp082754	IC3
Exp082755	IC3
Exp082756	IC3
Exp082757	IC3
Exp082758	IC3
Exp082759	IC3
Exp082760	IC3
Exp082761	IC3
Exp082762	IC3
Exp082763	IC3
Exp082764	IC3
Exp082765	IC3
Exp082766	IC3
Exp082767	IC3
Exp082768	IC3
Exp082769	IC3
Exp082770	IC3
Exp082771	IC3
Exp082772	IC3
Exp082773	IC3
Exp082774	IC3
Exp082775	IC3
Exp082777	IC3
Exp082778	IC3
Exp082779	IC3
Exp082780	IC3
Exp082781	IC3
Exp082782	IC3
Exp082783	IC3
Exp082784	IC3
Exp082785	IC3
Exp082786	IC3
Exp082787	IC3
Exp082788	IC3
Exp082789	IC3
Exp082790	IC3
Exp082791	IC3
Exp082792	IC3
Exp082793	IC3
Exp082794	IC3
Exp082795	IC3
Exp082796	IC3
Exp082797	IC3
Exp082798	IC3
Exp082799	IC3
Exp082800	IC3
Exp082801	IC3
Exp082802	IC3
Exp082803	IC3
Exp082804	IC3
Exp082805	IC3
Exp082806	IC3
Exp082807	IC3
Exp082808	IC3
Exp082809	IC3
Exp082810	IC3
Exp082811	IC3
Exp082812	IC3
Exp082813	IC3
Exp082814	IC3
Exp082815	IC3
Exp082816	IC3
Exp082817	IC3
Exp082818	IC3
Exp082819	IC3
Exp082820	IC3
Exp082821	IC3
Exp082822	IC3
Exp082823	IC3
Exp082824	IC3
Exp082825	IC3
Exp082826	IC3
Exp082827	IC3
Exp082828	IC3
Exp082829	IC3
Exp082830	IC3
Exp082831	IC3
Exp082832	IC3
Exp082833	IC3
Exp082834	IC3
Exp082835	IC3
Exp082836	IC3
Exp082837	IC3
Exp082838	IC3
Exp082839	IC3
Exp082840	IC3
Exp082841	IC3
Exp082842	IC3
Exp082843	IC3
Exp082844	IC3
Exp082845	IC3
Exp082846	IC3
Exp082847	IC3
Exp082848	IC3
Exp082849	IC3
Exp082850	IC3
Exp082851	IC3
Exp082852	IC3
Exp082853	IC3
Exp082854	IC3
Exp082855	IC3
Exp082856	IC3
Exp082857	IC3
Exp082858	IC3
Exp082859	IC3
Exp082860	IC3
Exp082861	IC3
Exp082862	IC3
Exp082863	IC3
Exp082864	IC3
Exp082865	IC3
Exp082866	IC3
Exp082867	IC3
Exp082868	IC3
Exp082869	IC3
Exp082870	IC3
Exp082871	IC3
Exp082888	IC3
Exp087320	IC3
Exp087344	IC3
Exp087418	IC3
Exp072636	IC1
Exp074388	IC4
Exp075580	IC4
Exp075581	IC4
Exp075584	IC4
Exp075585	IC4
Exp075588	IC4
Exp075589	IC4
Exp076193	IC4
Exp079142	IC4
Exp079146	IC4
Exp079147	IC4
Exp079148	IC4
Exp079162	IC1
Exp079170	IC4
Exp079183	IC4
Exp079184	IC4
Exp079210	IC4
Exp079212	IC4
Exp079214	IC4
Exp079228	IC4
Exp079246	IC4
Exp079249	IC4
Exp079283	IC4
Exp079286	IC4
Exp079297	IC4
Exp081460	IC4
Exp081465	IC4
Exp081468	IC4
Exp081472	IC4
Exp081474	IC4
Exp081475	IC4
Exp081479	IC4
Exp081486	IC4
Exp081487	IC4
Exp081590	IC4
Exp081591	IC4
Exp081599	IC4
Exp081600	IC4
Exp081612	IC4
Exp082929	IC4
Exp082934	IC4
Exp082955	IC4
Exp082971	IC4
Exp082978	IC4
Exp083009	IC4
Exp083924	IC4
Exp083941	IC4
Exp083942	IC4
Exp083943	IC4
Exp083947	IC4
Exp083959	IC4
Exp083961	IC4
Exp087332	IC4
Exp087334	IC4
Exp087343	IC4
Exp087349	IC4
Exp087352	IC4
Exp087361	IC4
Exp087365	IC4
Exp087416	IC4
Exp087425	IC4
Exp087436	IC4
Exp087442	IC4
Exp087462	IC4
Exp079141	IC2
Exp079185	IC2
Exp079207	IC2
Exp081458	IC2
Exp081483	IC2
Exp081587	IC2
Exp082964	IC2
Exp082980	IC2
Exp087448	IC2
Exp087457	IC2
Exp087459	IC2
Exp072638	IC2
Exp079175	IC2
Exp079191	IC2
Exp079203	IC2
Exp079204	IC2
Exp079215	IC2
Exp079230	IC2
Exp079233	IC2
Exp079238	IC2
Exp079263	IC2
Exp079266	IC2
Exp079289	IC2
Exp081463	IC2
Exp081471	IC2
Exp081476	IC2
Exp081492	IC2
Exp081575	IC2
Exp081576	IC2
Exp082986	IC2
Exp082994	IC2
Exp083933	IC2
Exp087313	IC2
Exp087324	IC2
Exp087337	IC2
Exp087450	IC2
Exp072643	IC2
Exp075582	IC2
Exp075587	IC2
Exp075590	IC2
Exp075592	IC2
Exp079140	IC2
Exp079144	IC2
Exp079149	IC2
Exp079154	IC2
Exp079180	IC2
Exp079186	IC2
Exp079193	IC2
Exp079197	IC2
Exp079205	IC2
Exp079220	IC2
Exp079223	IC2
Exp079225	IC2
Exp079241	IC2
Exp079243	IC2
Exp079247	IC2
Exp079252	IC2
Exp079274	IC2
Exp079285	IC2
Exp081461	IC2
Exp081477	IC2
Exp081480	IC2
Exp081482	IC2
Exp081485	IC2
Exp081488	IC2
Exp081491	IC2
Exp081571	IC2
Exp081572	IC2
Exp081577	IC2
Exp081586	IC2
Exp082904	IC2
Exp082910	IC2
Exp082919	IC2
Exp082932	IC2
Exp082938	IC2
Exp082940	IC2
Exp082975	IC2
Exp082987	IC2
Exp082991	IC2
Exp082993	IC2
Exp082997	IC2
Exp082998	IC2
Exp083918	IC2
Exp083956	IC2
Exp083962	IC2
Exp087321	IC2
Exp087360	IC2
Exp087362	IC2
Exp087429	IC2
Exp087465	IC2
Exp087469	IC2
Exp087471	IC2
Exp079143	IC4
Exp079155	IC1
Exp079156	IC1
Exp079165	IC4
Exp079166	IC4
Exp079176	IC4
Exp079178	IC4
Exp079181	IC4
Exp079188	IC4
Exp079189	IC4
Exp079190	IC4
Exp079195	IC4
Exp079198	IC4
Exp079199	IC4
Exp079202	IC4
Exp079206	IC4
Exp079209	IC4
Exp079211	IC4
Exp079216	IC4
Exp079219	IC4
Exp079221	IC4
Exp079222	IC4
Exp079234	IC4
Exp079245	IC4
Exp079248	IC4
Exp079253	IC4
Exp079255	IC4
Exp079260	IC4
Exp079261	IC4
Exp079270	IC4
Exp079273	IC4
Exp079275	IC4
Exp079279	IC4
Exp079290	IC4
Exp079292	IC4
Exp079294	IC4
Exp079300	IC4
Exp079301	IC4
Exp079303	IC4
Exp081457	IC4
Exp081462	IC4
Exp081469	IC4
Exp081470	IC4
Exp081481	IC4
Exp081494	IC4
Exp081495	IC4
Exp081496	IC4
Exp081497	IC4
Exp081498	IC4
Exp081499	IC4
Exp081500	IC4
Exp081501	IC4
Exp081502	IC4
Exp081503	IC4
Exp081504	IC4
Exp081505	IC4
Exp081506	IC4
Exp081507	IC4
Exp081508	IC4
Exp081509	IC4
Exp081510	IC4
Exp081511	IC4
Exp081512	IC4
Exp081513	IC4
Exp081514	IC4
Exp081515	IC4
Exp081516	IC4
Exp081517	IC4
Exp081518	IC4
Exp081519	IC4
Exp081520	IC4
Exp081521	IC4
Exp081522	IC4
Exp081523	IC4
Exp081524	IC4
Exp081525	IC4
Exp081527	IC4
Exp081528	IC4
Exp081529	IC4
Exp081530	IC4
Exp081531	IC4
Exp081532	IC4
Exp081533	IC4
Exp081534	IC4
Exp081535	IC4
Exp081536	IC4
Exp081537	IC4
Exp081538	IC4
Exp081539	IC4
Exp081540	IC4
Exp081541	IC4
Exp081542	IC4
Exp081543	IC4
Exp081544	IC4
Exp081545	IC4
Exp081546	IC4
Exp081547	IC4
Exp081548	IC4
Exp081549	IC4
Exp081550	IC4
Exp081551	IC4
Exp081552	IC4
Exp081553	IC4
Exp081554	IC4
Exp081555	IC4
Exp081559	IC4
Exp081560	IC4
Exp081561	IC4
Exp081562	IC4
Exp081563	IC4
Exp081564	IC4
Exp081565	IC4
Exp081566	IC4
Exp081567	IC4
Exp081568	IC4
Exp082930	IC4
Exp082936	IC4
Exp082939	IC4
Exp082941	IC4
Exp082945	IC4
Exp082951	IC4
Exp082957	IC4
Exp082958	IC4
Exp082959	IC4
Exp082960	IC4
Exp087295	IC4
Exp087296	IC4
Exp087297	IC4
Exp087298	IC4
Exp087299	IC4
Exp087300	IC4
Exp087301	IC4
Exp087302	IC4
Exp087304	IC4
Exp087317	IC4
Exp087326	IC4
Exp087347	IC4
Exp087460	IC4
Exp089258	IC4
Exp072648	IC5
Exp072650	IC5
Exp074382	IC5
Exp074395	IC5
Exp076158	IC5
Exp076174	IC5
Exp078926	IC5
Exp078927	IC5
Exp078928	IC5
Exp078930	IC5
Exp078931	IC5
Exp078932	IC5
Exp078933	IC5
Exp078934	IC5
Exp078935	IC5
Exp078936	IC5
Exp078937	IC5
Exp078938	IC5
Exp078939	IC5
Exp078940	IC5
Exp078941	IC5
Exp078942	IC5
Exp078943	IC5
Exp078944	IC5
Exp078945	IC5
Exp078946	IC5
Exp078947	IC5
Exp078948	IC5
Exp078949	IC5
Exp078950	IC5
Exp078951	IC5
Exp078952	IC5
Exp078953	IC5
Exp078954	IC5
Exp078955	IC5
Exp078956	IC5
Exp078957	IC5
Exp078958	IC5
Exp078959	IC5
Exp078960	IC5
Exp078961	IC5
Exp078962	IC5
Exp078963	IC5
Exp078964	IC5
Exp078965	IC5
Exp078966	IC5
Exp078967	IC5
Exp078968	IC5
Exp078969	IC5
Exp078970	IC5
Exp078971	IC5
Exp078972	IC5
Exp078973	IC5
Exp078974	IC5
Exp078975	IC5
Exp078976	IC5
Exp078977	IC5
Exp078978	IC5
Exp078979	IC5
Exp078980	IC5
Exp078981	IC5
Exp078982	IC5
Exp078983	IC5
Exp078984	IC5
Exp078985	IC5
Exp078986	IC5
Exp078987	IC5
Exp078988	IC5
Exp078989	IC5
Exp078990	IC5
Exp078991	IC5
Exp078992	IC5
Exp078993	IC5
Exp078994	IC5
Exp078995	IC5
Exp078996	IC5
Exp078997	IC5
Exp078998	IC5
Exp078999	IC5
Exp079000	IC5
Exp079002	IC5
Exp079003	IC5
Exp079004	IC5
Exp079005	IC5
Exp079006	IC5
Exp079007	IC5
Exp079008	IC5
Exp079009	IC5
Exp079010	IC5
Exp079011	IC5
Exp079012	IC5
Exp079014	IC5
Exp079015	IC5
Exp079016	IC5
Exp079017	IC5
Exp079018	IC5
Exp079019	IC5
Exp079020	IC5
Exp079021	IC5
Exp079022	IC5
Exp079023	IC5
Exp079025	IC5
Exp079026	IC5
Exp079027	IC5
Exp079028	IC5
Exp079029	IC5
Exp079030	IC5
Exp079031	IC5
Exp079032	IC5
Exp079033	IC5
Exp079034	IC5
Exp079035	IC5
Exp079036	IC5
Exp079037	IC5
Exp079038	IC5
Exp079039	IC5
Exp079040	IC5
Exp079041	IC5
Exp079042	IC5
Exp079043	IC5
Exp079044	IC5
Exp079045	IC5
Exp079046	IC5
Exp079047	IC5
Exp079048	IC5
Exp079049	IC5
Exp079050	IC5
Exp079051	IC5
Exp079052	IC5
Exp079053	IC5
Exp079054	IC5
Exp079055	IC5
Exp079056	IC5
Exp079057	IC5
Exp079058	IC5
Exp079059	IC5
Exp079060	IC5
Exp079061	IC5
Exp079062	IC5
Exp079063	IC5
Exp079064	IC5
Exp079065	IC5
Exp079066	IC5
Exp079067	IC5
Exp079068	IC5
Exp079069	IC5
Exp079070	IC5
Exp079071	IC5
Exp079072	IC5
Exp079073	IC5
Exp079074	IC5
Exp079075	IC5
Exp079076	IC5
Exp079077	IC5
Exp079078	IC5
Exp079079	IC5
Exp079080	IC5
Exp079081	IC5
Exp079082	IC5
Exp079083	IC5
Exp079084	IC5
Exp079085	IC5
Exp079086	IC5
Exp079087	IC5
Exp079088	IC5
Exp079089	IC5
Exp079090	IC5
Exp079091	IC5
Exp079092	IC5
Exp079093	IC5
Exp079094	IC5
Exp079095	IC5
Exp079096	IC5
Exp079097	IC5
Exp079098	IC5
Exp079099	IC5
Exp079100	IC5
Exp079101	IC5
Exp079102	IC5
Exp079103	IC5
Exp079107	IC5
Exp079108	IC5
Exp079109	IC5
Exp079110	IC5
Exp079111	IC5
Exp079112	IC5
Exp079113	IC5
Exp079114	IC5
Exp079115	IC5
Exp079116	IC5
Exp079117	IC5
Exp079118	IC5
Exp079119	IC5
Exp079120	IC5
Exp079121	IC5
Exp079122	IC5
Exp079123	IC5
Exp079124	IC5
Exp079125	IC5
Exp079126	IC5
Exp079127	IC5
Exp079128	IC5
Exp079129	IC5
Exp079130	IC5
Exp079131	IC5
Exp079132	IC5
Exp079133	IC5
Exp079134	IC5
Exp079135	IC5
Exp079136	IC5
Exp079137	IC5
Exp082882	IC5
Exp083953	IC5
Exp083954	IC5
Exp083955	IC5
Exp083967	IC5
Exp083969	IC5
Exp083971	IC5
Exp083972	IC5
Exp083973	IC5
Exp083974	IC5
Exp083975	IC5
Exp083978	IC5
Exp083979	IC5
Exp083980	IC5
Exp083981	IC5
Exp083982	IC5
Exp083983	IC5
Exp083984	IC5
Exp083987	IC5
Exp083988	IC5
Exp083989	IC5
Exp087451	IC5
Exp079159	IC1
Exp079229	IC1
Exp079244	IC1
Exp079257	IC1
Exp079272	IC1
Exp079287	IC1
Exp079288	IC1
Exp079307	IC1
Exp081459	IC1
Exp081484	IC1
Exp081573	IC1
Exp082935	IC1
Exp082949	IC1
Exp083952	IC1
Exp083958	IC1
Exp087315	IC1
Exp087322	IC1
Exp087325	IC1
Exp087357	IC1
Exp087422	IC1
Exp087443	IC1
Exp079167	IC1
Exp079265	IC1
Exp081578	IC1
Exp081579	IC1
Exp081588	IC1
Exp083920	IC1
Exp083944	IC1
Exp087350	IC1
Exp087434	IC1
Exp087470	IC1
Exp074390	IC4
Exp076179	IC4
Exp079164	IC4
Exp079173	IC4
Exp079177	IC4
Exp079182	IC4
Exp079187	IC4
Exp079194	IC4
Exp079224	IC4
Exp079227	IC4
Exp079236	IC4
Exp079239	IC4
Exp079242	IC4
Exp079250	IC4
Exp079251	IC4
Exp079256	IC4
Exp079258	IC4
Exp079259	IC4
Exp079262	IC4
Exp079264	IC4
Exp079267	IC4
Exp079268	IC4
Exp079277	IC4
Exp079281	IC4
Exp079291	IC4
Exp079296	IC4
Exp079298	IC4
Exp079299	IC4
Exp079302	IC4
Exp079304	IC4
Exp081464	IC4
Exp081493	IC4
Exp081583	IC4
Exp081584	IC4
Exp081585	IC4
Exp081623	IC4
Exp082913	IC4
Exp082931	IC4
Exp082946	IC4
Exp082947	IC4
Exp082979	IC4
Exp083007	IC4
Exp083932	IC4
Exp087310	IC4
Exp087311	IC4
Exp087314	IC4
Exp087319	IC4
Exp087323	IC4
Exp087449	IC4
Exp075579	IC1
Exp075591	IC1
Exp075593	IC1
Exp076198	IC1
Exp079163	IC1
Exp079174	IC1
Exp079192	IC1
Exp079201	IC1
Exp079218	IC1
Exp079240	IC1
Exp079254	IC1
Exp079276	IC1
Exp079282	IC1
Exp081467	IC1
Exp081489	IC1
Exp081581	IC1
Exp081582	IC1
Exp082886	IC1
Exp082937	IC1
Exp082942	IC1
Exp082948	IC1
Exp082950	IC1
Exp082952	IC1
Exp082953	IC1
Exp082956	IC1
Exp082974	IC1
Exp082981	IC1
Exp082995	IC1
Exp083921	IC1
Exp083949	IC1
Exp083951	IC1
Exp083965	IC1
Exp083970	IC1
Exp083976	IC1
Exp083985	IC1
Exp083986	IC1
Exp087336	IC1
Exp087338	IC1
Exp087339	IC1
Exp087340	IC1
Exp087342	IC1
Exp087345	IC1
Exp087351	IC1
Exp087454	IC1
Exp076153	IC2
Exp079150	IC2
Exp079153	IC2
Exp079168	IC2
Exp079208	IC2
Exp079217	IC2
Exp079293	IC2
Exp079306	IC2
Exp081490	IC2
Exp081569	IC2
Exp081570	IC2
Exp083968	IC2
Exp087316	IC2
Exp087327	IC2
Exp087335	IC2
Exp087341	IC2
Exp087346	IC2
Exp087420	IC2
Exp079179	IC2
Exp079196	IC2
Exp079200	IC2
Exp079213	IC2
Exp079305	IC2
Exp081574	IC2
Exp081595	IC2
Exp081596	IC2
Exp081602	IC2
Exp081611	IC2
Exp082916	IC2
Exp082967	IC2
Exp082972	IC2
Exp082989	IC2
Exp083966	IC2
Exp087312	IC2
Exp087358	IC2
Exp087423	IC2
Exp087437	IC2
Exp087438	IC2
Exp087452	IC2
Exp076167	IC1
Exp079139	IC1
Exp079145	IC1
Exp079152	IC1
Exp079157	IC1
Exp079158	IC1
Exp081589	IC1
Exp081592	IC1
Exp081593	IC1
Exp081594	IC1
Exp081597	IC1
Exp081598	IC1
Exp081603	IC1
Exp081606	IC1
Exp081609	IC1
Exp081610	IC1
Exp081613	IC1
Exp081615	IC1
Exp081616	IC1
Exp081617	IC1
Exp081618	IC1
Exp081619	IC1
Exp081621	IC1
Exp081622	IC1
Exp082891	IC1
Exp082954	IC1
Exp082966	IC1
Exp082977	IC1
Exp082982	IC1
Exp082983	IC1
Exp082985	IC1
Exp082996	IC1
Exp082999	IC1
Exp083000	IC1
Exp083001	IC1
Exp083002	IC1
Exp083003	IC1
Exp083004	IC1
Exp083005	IC1
Exp083006	IC1
Exp083008	IC1
Exp083919	IC1
Exp083922	IC1
Exp083923	IC1
Exp083925	IC1
Exp083926	IC1
Exp083927	IC1
Exp083928	IC1
Exp083929	IC1
Exp083930	IC1
Exp083931	IC1
Exp083938	IC1
Exp083939	IC1
Exp083940	IC1
Exp083945	IC1
Exp083946	IC1
Exp083948	IC1
Exp083950	IC1
Exp083957	IC1
Exp083960	IC1
Exp083963	IC1
Exp083964	IC1
Exp083977	IC1
Exp087305	IC4
Exp087328	IC1
Exp087330	IC1
Exp087348	IC1
Exp087353	IC1
Exp087354	IC1
Exp087355	IC1
Exp087356	IC1
Exp087359	IC1
Exp087364	IC1
Exp087366	IC1
Exp087415	IC1
Exp087417	IC1
Exp087419	IC1
Exp087421	IC1
Exp087424	IC1
Exp087427	IC1
Exp087428	IC1
Exp087430	IC1
Exp087431	IC1
Exp087432	IC1
Exp087433	IC1
Exp087435	IC1
Exp087439	IC1
Exp087441	IC1
Exp087445	IC1
Exp087446	IC1
Exp087447	IC1
Exp087456	IC1
Exp087458	IC1
Exp087463	IC1
Exp087464	IC1
Exp087466	IC1
Exp087468	IC1
Exp087472	IC1
Exp087474	IC1
Exp087475	IC1
Exp089257	IC1
Exp074385	IC3
Exp076181	IC3
Exp081624	IC3
Exp081625	IC3
Exp081626	IC3
Exp081627	IC3
Exp081628	IC3
Exp081629	IC3
Exp081630	IC3
Exp081631	IC3
Exp081632	IC3
Exp081633	IC3
Exp081634	IC3
Exp081635	IC3
Exp081636	IC3
Exp081638	IC3
Exp081639	IC3
Exp081640	IC3
Exp081641	IC3
Exp081642	IC3
Exp081643	IC3
Exp081644	IC3
Exp081645	IC3
Exp081646	IC3
Exp081648	IC3
Exp081649	IC3
Exp081650	IC3
Exp081651	IC3
Exp081652	IC3
Exp081653	IC3
Exp081654	IC3
Exp081655	IC3
Exp081656	IC3
Exp081657	IC3
Exp081658	IC3
Exp081659	IC3
Exp081660	IC3
Exp081661	IC3
Exp081662	IC3
Exp081663	IC3
Exp081664	IC3
Exp081665	IC3
Exp081666	IC3
Exp081667	IC3
Exp081668	IC3
Exp081669	IC3
Exp081670	IC3
Exp081671	IC3
Exp081672	IC3
Exp081673	IC3
Exp081674	IC3
Exp081675	IC3
Exp081676	IC3
Exp081677	IC3
Exp081678	IC3
Exp081679	IC3
Exp081680	IC3
Exp081681	IC3
Exp081682	IC3
Exp081683	IC3
Exp081684	IC3
Exp081685	IC3
Exp081686	IC3
Exp081687	IC3
Exp081688	IC3
Exp081689	IC3
Exp081690	IC3
Exp081691	IC3
Exp081692	IC3
Exp081693	IC3
Exp081694	IC3
Exp081695	IC3
Exp081696	IC3
Exp081697	IC3
Exp081698	IC3
Exp081699	IC3
Exp081700	IC3
Exp082708	IC3
Exp082709	IC3
Exp082710	IC3
Exp082711	IC3
Exp082712	IC3
Exp082714	IC3
Exp082715	IC3
Exp082716	IC3
Exp082717	IC3
Exp082718	IC3
Exp082719	IC3
Exp082720	IC3
Exp082721	IC3
Exp082722	IC3
Exp082723	IC3
Exp082724	IC3
Exp082725	IC3
Exp082726	IC3
Exp082727	IC3
Exp082728	IC3
Exp082729	IC3
Exp082730	IC3
Exp082731	IC3
Exp082732	IC3
Exp082733	IC3
Exp082734	IC3
Exp082735	IC3
Exp082736	IC3
Exp082737	IC3
Exp082738	IC3
Exp082739	IC3
Exp082740	IC3
Exp082741	IC3
Exp082742	IC3
Exp082743	IC3
Exp082744	IC3
Exp082745	IC3
Exp082746	IC3
Exp082747	IC3
Exp082748	IC3
Exp082749	IC3
Exp082750	IC3
Exp082751	IC3
Exp082900	IC3

## Sheet: Pathway (KEGG)
Pathway scores from GSVA(KEGG) based on global proteomic data
	Exp079160	Exp081604	Exp081605	Exp081614	Exp082976	Exp087306	Exp087307	Exp087308	Exp087318	Exp087444	Exp087461	Exp087333	Exp087367	Exp087368	Exp087369	Exp087370	Exp087371	Exp087372	Exp087373	Exp087374	Exp087375	Exp087376	Exp087377	Exp087378	Exp087379	Exp087380	Exp087381	Exp087382	Exp087383	Exp087384	Exp087385	Exp087386	Exp087387	Exp087388	Exp087389	Exp087390	Exp087391	Exp087392	Exp087393	Exp087397	Exp087398	Exp087399	Exp087400	Exp087401	Exp087402	Exp087403	Exp087404	Exp087405	Exp087406
KEGG_GLYCOLYSIS_GLUCONEOGENESIS	0.435244	-0.0824454	-0.186631	-0.127396	-0.226941	-0.315373	-0.343236	-0.134598	-0.191045	-0.0986884	0.0566548	0.192235	-0.0287084	-0.211397	0.0313026	0.183656	0.0215006	0.282374	-0.0282778	-0.0026484	0.0152436	-0.0998419	-0.270264	-0.346396	0.243279	-0.288343	-0.28725	-0.0681056	0.0788545	0.0702654	0.201491	0.402399	-0.324556	0.108432	-0.0639537	-0.167205	-0.100792	0.297578	-0.128258	-0.0450916	0.0629753	0.260511	-0.0136414	-0.0457611	0.0189123	-0.169196	-0.0329914	-0.178132	-0.120193
KEGG_CITRATE_CYCLE_TCA_CYCLE	0.326654	-0.191604	-0.279912	-0.126385	-0.0580685	-0.392278	-0.0788302	0.0386241	-0.532517	-0.20221	0.148049	-0.174962	-0.20937	-0.231109	-0.00458468	-0.0327499	0.0693735	0.197074	-0.137564	-0.235307	0.0799412	-0.0469505	-0.286702	0.0988558	-0.0876877	-0.141928	-0.335068	-0.0140839	-0.0759686	-0.111301	-0.0634124	-0.0021097	-0.402861	0.234976	-0.0753873	-0.311123	0.0280306	-0.00602885	-0.376465	-0.0263748	-0.298515	0.0218438	-0.0655632	-0.162887	-0.0443572	-0.4405	-0.374529	-0.298166	-0.186399
KEGG_PENTOSE_PHOSPHATE_PATHWAY	0.254918	-0.0263155	0.360326	-0.0370272	-0.244135	-0.104752	-0.0722516	0.342607	0.0661256	0.0398293	0.297001	0.331192	0.268587	-0.271474	0.207868	-0.373621	0.0520424	-0.111378	-0.10839	-0.0523132	0.144962	0.0208047	-0.244535	-0.281218	-0.161662	-0.255732	-0.114332	0.220618	0.00282233	-0.119399	0.119785	0.24214	-0.219886	-0.00693856	-0.323942	-0.0899112	-0.202366	0.150598	-0.281416	-0.227505	0.318878	-0.0815744	-0.00592562	-0.113963	-0.086135	-0.383479	-0.291707	-0.142457	-0.220884
KEGG_PENTOSE_AND_GLUCURONATE_INTERCONVERSIONS	0.44726	0.0138652	0.347173	-0.130418	0.243479	0.180493	-0.0140631	-0.0888442	-0.197925	-0.0375919	0.266794	-0.280356	0.518115	-0.330701	0.424976	0.203212	-0.262776	0.0827941	0.371696	-0.252805	-0.0541892	-0.234969	0.249524	-0.0747424	0.325498	0.0113006	0.4915	-0.193119	0.229584	0.0991968	-0.00866387	0.127287	0.298767	0.173779	0.163254	0.45531	0.485405	-0.209725	0.0176611	0.00557552	0.0713511	-0.157209	-0.137997	-0.0271343	0.148312	0.557626	0.397838	-0.0131934	-0.241926
KEGG_FRUCTOSE_AND_MANNOSE_METABOLISM	0.406519	0.0971268	0.422732	0.229515	0.0635224	-0.0534753	0.0894664	0.000297972	0.0908028	0.0848886	0.0989475	0.349375	0.282441	-0.0507776	0.0977581	0.0840255	0.172438	0.00917206	-0.097105	0.2828	-0.099826	-0.149952	-0.174105	-0.0384101	-0.109699	0.0461061	-0.0623367	0.0649685	0.37768	-0.174457	-0.108495	0.203095	-0.170448	0.195126	-0.036165	-0.255993	0.0183262	0.221821	0.11218	0.0582033	0.0378791	-0.182237	0.0316981	0.00590642	0.172407	-0.0841356	-0.132912	0.186954	-0.285289
KEGG_GALACTOSE_METABOLISM	0.239299	-0.151073	0.269771	0.0821081	-0.128594	-0.414344	-0.434515	-0.347023	-0.287033	-0.105661	-0.0947315	0.0996464	0.240865	-0.337146	-0.0273692	-0.121758	-0.229431	-0.136059	-0.126593	-0.274086	-0.333207	-0.315094	-0.233116	-0.2091	-0.341909	-0.370203	-0.042923	-0.0989957	0.0472154	-0.359502	-0.42627	-0.11754	-0.174791	-0.1209	-0.0413953	-0.204358	0.214759	-0.129157	-0.312392	-0.131233	-0.431998	-0.369282	-0.115584	-0.182179	-0.153627	-0.237654	-0.217545	-0.297265	-0.216792
KEGG_ASCORBATE_AND_ALDARATE_METABOLISM	0.500827	0.113137	0.326131	-0.194184	0.25076	0.180882	0.192759	0.075366	-0.194456	0.558463	0.397739	0.302018	0.306015	0.18253	0.488729	0.524655	0.205364	0.65645	-0.193784	-0.229248	0.309447	-0.120877	-0.391334	-0.0641255	0.507892	-0.073353	-0.448498	-0.268758	-0.552447	0.0994467	0.404865	0.290042	-0.543471	-0.107326	-0.290136	0.514917	-0.361183	0.280235	-0.262252	-0.301718	-0.264312	0.0263583	0.485383	-0.2168	-0.245077	-0.111323	0.0817489	0.225246	0.196225
KEGG_FATTY_ACID_METABOLISM	-0.194618	-0.260338	-0.367001	-0.371305	-0.116829	-0.259618	-0.228517	-0.0831157	0.0235169	0.00446615	0.00327109	0.184831	-0.123615	0.0720272	-0.0163879	0.110976	-0.0424054	-0.0510363	-0.146279	-0.0277816	-0.147932	0.0766829	0.145018	-0.175001	0.218714	-0.0735137	-0.0550648	-0.209498	-0.290234	0.0741059	-0.0128259	0.0467644	-0.0722142	-0.0862054	-0.147239	0.0307871	-0.250973	0.135205	-0.174537	-0.116419	0.218507	-0.0991087	0.226633	-0.185329	-0.189096	-0.0211844	-0.153741	0.0384887	-0.0106186
KEGG_STEROID_HORMONE_BIOSYNTHESIS	0.144427	0.219297	0.203232	-0.418818	-0.0914835	0.19607	0.0807026	-0.147504	-0.142127	-0.12013	0.0512599	0.0386905	0.0792957	-0.306536	0.139463	0.0693764	0.0389449	0.00590126	0.213455	-0.241188	0.148777	-0.151908	-0.176012	0.360591	-0.0191445	0.000203538	0.190762	0.215789	0.224831	-0.0570267	0.356472	0.296406	0.104503	-0.0243717	0.026575	-0.0628241	-0.385794	-0.283984	-0.178605	-0.308924	0.136198	0.420203	0.0707234	-0.355198	-0.0121462	-0.141749	-0.0936533	-0.18292	-0.336021
KEGG_OXIDATIVE_PHOSPHORYLATION	0.00498894	0.0945895	0.0662716	0.0979281	-0.110252	-0.031087	-0.05733	-0.0322493	0.0819465	0.126959	0.0408134	0.00518791	0.0492049	-0.00418563	0.0319429	0.133778	-0.0636296	0.121685	0.152925	0.0307962	0.0869841	0.0841827	0.10369	0.0310529	0.0498494	0.0473487	-0.0745995	0.00309119	-0.0750724	0.130045	-0.0823712	0.147653	0.109146	-0.00662657	0.0373143	0.158984	0.00593977	0.0660737	0.0177674	-0.0399935	-0.0498709	0.00607865	0.0642636	0.0230445	-0.0755706	0.210543	0.0698764	0.098034	-0.0970556
KEGG_PURINE_METABOLISM	0.0514817	-0.0166721	-0.0173074	0.252168	0.0442216	0.252811	0.0823723	0.14451	0.258011	0.105814	0.26276	0.00535299	0.0644112	0.0145215	0.108817	0.0788943	0.221271	0.0775823	-0.0295802	0.137007	0.332907	0.287739	0.091447	0.0153241	0.346476	0.344047	0.134729	0.224973	0.158497	0.249878	0.186652	0.334571	0.0487065	0.293439	0.0533476	0.0771319	0.0236223	0.0925453	0.0374539	0.0225612	0.290514	0.0910732	0.10066	0.102609	0.274029	0.066895	-0.0330036	-0.0366444	0.0282941
KEGG_PYRIMIDINE_METABOLISM	-0.0837485	-0.11088	0.0921464	0.0989951	0.0889607	0.0460383	-0.197271	-0.147226	0.306903	0.0646375	0.285824	0.261543	0.292926	0.122866	0.306264	0.157309	0.238055	0.327068	0.147461	0.224207	0.410853	0.395572	0.282919	0.228827	0.386368	0.474064	0.207779	0.28661	0.201426	0.25939	0.424605	0.394868	0.145457	0.387841	0.0118893	0.06941	0.0933613	0.163943	0.245993	0.134171	0.337489	0.167255	0.269508	0.0761475	0.358242	0.269304	-0.00176528	0.17545	0.19074
KEGG_ALANINE_ASPARTATE_AND_GLUTAMATE_METABOLISM	-0.134965	-0.407234	-0.230784	-0.194615	-0.0957455	0.0769725	-0.13654	-0.218055	-0.122294	-0.194743	-0.041636	0.021085	0.310374	0.114449	0.254439	0.146885	0.213398	0.0931787	-0.179094	-0.0637573	0.113788	0.37081	0.329188	0.44439	0.223691	0.470421	0.234255	0.459256	0.341541	0.218869	-0.00783792	0.164371	0.16269	0.297249	0.266033	-0.0392594	-0.0101724	-0.248868	0.309717	0.40958	0.127941	0.252326	0.0368715	-0.145794	-0.0802545	-0.0309056	-0.108133	-0.10657	-0.07141
KEGG_GLYCINE_SERINE_AND_THREONINE_METABOLISM	0.141969	-0.150472	-0.0107857	0.148703	-0.225749	0.428725	0.0323921	-0.136322	0.103749	-0.158471	-0.283598	-0.374914	0.124383	0.354343	0.284119	-0.0824908	0.103302	0.145252	0.261438	0.019669	0.113296	0.0530449	0.432583	0.0661186	0.17801	0.233833	0.0395383	0.00541419	-0.189665	0.340032	0.137201	0.181279	0.112136	0.139577	-0.068218	-0.00942405	0.14872	0.0455413	0.0879581	0.0831045	-0.263541	-0.193961	-0.147435	-0.0855032	-0.125636	0.379309	0.0591453	0.0625783	0.299457
KEGG_CYSTEINE_AND_METHIONINE_METABOLISM	0.0465335	-0.216235	-0.142101	-0.0273213	-0.197462	0.0104943	-0.31038	-0.30458	0.222753	0.103556	-0.0566284	-0.314158	-0.0836007	0.208901	0.278121	0.259387	-0.0957831	-0.217834	0.161736	-0.0584317	-0.161377	-0.0636919	-0.0930154	-0.149305	0.130629	-0.012845	-0.348142	0.172478	-0.0878516	0.23273	0.0421295	-0.168131	0.160274	0.188579	-0.168898	-0.051987	0.132539	-0.117812	-0.145695	0.0903495	-0.122039	-0.0743576	-0.247877	0.141985	0.143417	-0.0124549	-0.0711842	0.2238	-0.0762454
KEGG_VALINE_LEUCINE_AND_ISOLEUCINE_DEGRADATION	0.0871165	-0.0181601	-0.105105	-0.129872	-0.298323	-0.303121	-0.161835	-0.0676183	0.00581772	0.199492	-0.106752	-0.0146514	-0.279619	-0.0961162	-0.0413348	-0.104222	-0.200159	-0.030085	-0.240401	-0.30861	-0.101371	0.19623	-0.276388	-0.29454	0.0648458	-0.00250948	-0.157354	-0.124382	-0.217726	-0.0703482	-0.205222	0.00259106	-0.253552	-0.0530958	0.0283636	-0.0290969	-0.264326	0.27888	-0.282502	-0.230719	-0.146882	-0.165211	0.0748663	-0.258275	-0.31145	-0.0196933	-0.100924	0.0970179	-0.0990891
KEGG_LYSINE_DEGRADATION	-0.073641	-0.250435	-0.0480476	-0.166934	-0.171379	-0.333763	-0.179558	-0.209352	-0.148562	0.223974	-0.043395	0.348161	0.14005	0.338717	0.27444	0.264743	0.108518	0.313468	0.0727067	0.0428584	0.226567	0.281675	0.252225	0.123721	0.393027	0.127919	-0.0523767	0.293643	-0.0987103	0.0694816	0.252166	0.281916	-0.273245	0.0707357	0.0358435	0.4303	0.0542	0.396381	0.045335	0.0605256	0.227301	0.221574	0.422344	-0.0440373	0.268798	0.260976	0.00953526	0.282306	0.0237559
KEGG_ARGININE_AND_PROLINE_METABOLISM	-0.200609	-0.309302	0.130356	-0.00254652	-0.20045	0.0929507	-0.055037	-0.271826	-0.069614	0.00828701	-0.133368	0.14819	0.241486	0.0833926	0.256743	0.110074	-0.0559601	0.00195166	-0.0606962	-0.124666	0.015788	-0.00955625	0.132048	0.25732	0.249876	0.120248	-0.159776	0.226108	-0.0763026	0.0533465	0.0402407	0.0897908	0.110897	0.165999	0.0316843	-0.0899524	-0.251745	-0.140313	-0.0697916	0.0504704	-0.288083	-0.0834445	0.0555041	-0.0736587	-0.329494	-0.260831	-0.316387	-0.106711	0.00553985
KEGG_HISTIDINE_METABOLISM	0.109848	0.302541	0.231795	-0.157723	-0.0676447	0.0587156	0.0411779	0.243896	0.38098	0.274384	0.208574	0.155271	0.0345059	0.117384	0.275642	0.0239091	0.121668	-0.0108883	-0.309847	-0.420786	0.14284	0.118057	-0.455491	-0.128117	0.490353	-0.143876	-0.416503	0.0565782	-0.378209	-0.128014	-0.0562395	0.280939	-0.181528	0.201094	0.0341284	0.104134	-0.185625	0.31917	-0.102135	0.095045	-0.22498	-0.0344509	0.252181	-0.132222	0.0143695	0.02652	0.155222	-0.058355	0.325551
KEGG_TYROSINE_METABOLISM	0.24285	0.433001	0.0326048	-0.0433513	0.038658	0.39502	0.177435	0.351473	0.281064	0.0493215	0.218295	-0.0730368	0.358293	0.354291	0.405475	0.100574	0.342062	0.199105	0.121077	-0.0542031	0.0858426	-0.101463	0.13574	0.0920282	0.468393	-0.0744875	0.078713	0.169906	0.176957	0.322079	0.186979	0.381303	0.198581	0.3699	-0.0997992	0.255134	-0.0244336	0.391644	0.189713	0.230088	0.12905	-0.0496216	0.325864	-0.082697	-0.0721889	-0.0239367	-0.0467401	0.214857	0.0921694
KEGG_PHENYLALANINE_METABOLISM	0.239906	-0.0430738	-0.224073	-0.336075	-0.398556	0.517039	0.156554	0.340783	0.171868	-0.248764	-0.293775	-0.465179	0.396956	0.501405	0.529828	-0.072627	0.295965	0.088389	-0.0196893	-0.4078	0.118926	-0.0355779	0.382154	-0.093702	0.541102	-0.229363	-0.257882	0.266452	0.127539	0.432855	0.119881	0.306853	0.344943	0.338946	0.122307	0.138327	-0.181908	0.366868	0.357882	0.249016	0.0286653	-0.123006	0.0390834	-0.0944382	-0.164228	-0.10056	-0.200522	0.142121	0.115726
KEGG_TRYPTOPHAN_METABOLISM	-0.0860321	-0.231609	-0.0380686	0.00314591	-0.24277	-0.0486933	-0.0443588	0.044822	0.057255	0.0955328	0.04897	0.266317	-0.161419	0.0771526	0.248111	0.0164738	-0.0399696	0.174049	-0.239351	-0.319055	0.196651	0.101176	0.0419025	0.119691	0.464394	-0.138642	-0.262632	0.329379	-0.330782	-0.0263621	0.147798	0.324521	-0.274233	0.13615	-0.131125	0.0935759	-0.342748	0.250522	-0.141367	-0.0442053	-0.00409104	-0.0119249	0.170096	-0.330213	0.00104883	-0.0817507	-0.159447	-0.0751945	-0.0470501
KEGG_BETA_ALANINE_METABOLISM	0.0829806	-0.104203	0.050707	-0.254414	-0.47157	-0.438983	-0.251982	0.116576	0.181666	-0.0221129	-0.251712	0.00152738	0.0100448	0.281945	-0.0960621	0.0558166	0.108293	0.197985	-0.291238	-0.263165	0.054981	0.105042	-0.0583857	-0.236452	0.337623	-0.0225111	-0.314495	-0.0284816	-0.238735	-0.0839703	0.0287184	-0.0240131	-0.330978	-0.130162	-0.347077	0.0204575	-0.174065	0.182705	-0.0269618	-0.334915	-0.162604	-0.397805	0.0105148	-0.257	-0.169637	0.0683636	-0.00162182	0.166259	-0.0632569
KEGG_SELENOAMINO_ACID_METABOLISM	0.387895	-0.10167	0.045583	-0.0744796	0.441042	0.332257	0.358431	-0.232239	-0.138986	-0.15109	0.260809	-0.215022	-0.325697	0.130319	-0.202968	0.188371	-0.149708	-0.257116	0.180641	0.161972	0.18638	0.323052	0.0700748	-0.123908	-0.270279	-0.00731924	-0.302058	0.440624	-0.0257959	0.0654634	-0.26779	-0.195976	0.185066	0.247839	-0.306465	-0.0991211	-0.25826	0.0762274	-0.0798033	-0.0543425	0.128986	-0.0590387	-0.239675	-0.16597	0.229067	-0.288317	-0.192433	-0.103041	-0.225615
KEGG_GLUTATHIONE_METABOLISM	0.225979	0.222091	-0.198529	-0.119173	-0.159307	-0.244362	-0.231578	-0.139909	-0.0370126	0.0833602	-0.292566	-0.0825185	0.0406647	0.242585	0.211389	0.0580367	0.181505	0.0241075	0.223271	0.223626	-0.159098	0.0947737	-0.149165	-0.00719611	-0.0475156	-0.0574269	-0.0346246	0.178436	0.102755	-0.0549953	-0.0424971	0.0614417	0.0164065	0.339353	-0.000141324	-0.21825	0.136264	0.13525	-0.174873	-0.12279	-0.0407312	0.0275083	-0.145505	-0.177223	0.285727	-0.1034	-0.083654	-0.0708764	-0.16635
KEGG_STARCH_AND_SUCROSE_METABOLISM	0.400202	0.0444884	0.134887	0.0614737	0.0895008	-0.210184	-0.330886	-0.162595	-0.310189	-0.258985	0.179755	0.18026	0.170338	-0.248244	0.0392197	0.146469	0.0385501	0.291393	0.310239	-0.160481	-0.0411739	-0.366686	-0.240679	-0.218922	-0.337732	-0.353603	0.0593199	-0.285795	0.238302	-0.271892	0.0490827	-0.130058	0.149508	0.0404764	0.105343	0.0894836	-0.064845	0.089261	-0.271711	-0.35102	-0.300885	0.0359633	-0.28065	-0.267099	-0.0185933	-0.286879	0.243471	-0.356022	0.0593558
KEGG_N_GLYCAN_BIOSYNTHESIS	-0.0944649	-0.117385	0.119825	-0.259219	0.019488	-0.148665	-0.0975632	0.0231514	0.134257	-0.0863341	0.142207	-0.0213429	-0.156471	-0.0506039	0.12473	0.141589	0.238962	0.0148881	0.202338	0.0670971	0.0389225	0.0768491	-0.247895	-0.0808034	-0.0611977	-0.0581853	0.0615247	0.175814	0.00745569	0.0437892	-0.0520738	-0.112927	-0.257804	-0.0482361	-0.00260482	-0.203276	-0.303494	0.00447457	0.0903657	-0.342739	0.0733936	0.153068	-0.12496	0.0905797	-0.124909	0.0593218	0.0984588	0.090888	-0.0245028
KEGG_OTHER_GLYCAN_DEGRADATION	-0.109158	0.135721	-0.0518139	-0.14208	-0.14807	-0.119767	0.260192	-0.082858	-0.342263	-0.176584	0.028446	-0.0518997	0.0132592	0.0848877	-0.595393	0.0872421	-0.230013	0.191627	-0.227702	-0.164315	-0.211064	-0.0677621	-0.249689	0.0648121	-0.561202	-0.533434	0.113882	-0.0711668	-0.113317	-0.209395	-0.272476	-0.195139	-0.172899	-0.42356	-0.221285	-0.198534	-0.0254054	-0.179913	-0.290575	-0.0470724	-0.231403	-0.548876	-0.526534	-0.371368	-0.372073	-0.203808	-0.533867	-0.313647	-0.560693
KEGG_O_GLYCAN_BIOSYNTHESIS	0.0635411	0.489484	0.478074	0.238232	-0.189643	0.159869	0.0926769	0.396884	0.322774	0.189168	0.0915606	0.260218	0.408632	0.143381	-0.0677649	0.217712	-0.389194	0.257186	0.0943169	0.172885	0.064695	0.107284	0.178758	-0.0341529	-0.157408	-0.325127	-0.0477152	0.133854	-0.0419242	0.0490698	0.272829	0.174509	0.239519	0.202677	-0.40455	0.0568284	0.193392	0.284895	0.196295	-0.0506507	0.0143619	0.124329	0.260599	0.149835	0.219358	0.134777	0.200252	0.196141	0.104786
KEGG_AMINO_SUGAR_AND_NUCLEOTIDE_SUGAR_METABOLISM	0.0388348	-0.032791	-0.171821	-0.0312062	0.099972	-0.462518	-0.209809	-0.0213845	-0.409262	-0.204316	-0.0525835	0.0848995	0.00562194	-0.115142	0.00834721	-0.0123432	0.000724753	0.0369448	-0.172858	-0.119771	0.132658	-0.0203989	-0.266254	0.0739039	-0.0702067	0.130732	-0.129444	-0.0148195	0.156709	-0.0962673	-0.0867004	-0.116514	-0.0946461	0.248826	-0.00571912	-0.226401	0.0415167	-0.0825498	0.00950933	-0.338367	-0.127328	-0.219266	-0.164218	-0.304964	0.0470112	0.116558	-0.0563044	-0.232403	0.0462348
KEGG_GLYCOSAMINOGLYCAN_DEGRADATION	-0.191061	0.0108606	0.102928	0.113814	0.190681	0.217252	0.379136	0.0448022	0.178561	-0.23399	-0.130566	-0.0225302	-0.0988142	0.142261	-0.377716	-0.118406	0.0746439	0.276507	-0.124732	-0.049252	0.0771569	0.157462	-0.173281	0.180438	-0.194017	0.0180995	0.557268	-0.0671918	-0.0102092	0.0257494	-0.251545	-0.0143936	0.0207214	0.233329	0.169498	-0.118863	0.543337	-0.191641	0.413233	0.170004	0.153629	-0.0625787	-0.320168	-0.246347	0.221014	-0.0704682	0.1682	-0.0606353	-0.320609
KEGG_GLYCEROLIPID_METABOLISM	-0.0663021	-0.219164	0.0454571	-0.383226	-0.162379	-0.195785	-0.153351	-0.224284	-0.16633	0.142703	-0.147165	-0.118171	0.0802832	0.285557	0.169865	0.206255	-0.341557	0.196773	-0.0590084	-0.158358	-0.0742951	-0.0224254	-0.0725228	-0.0180655	0.2179	-0.095074	-0.251929	-0.337567	-0.318532	0.249655	0.100408	-0.0329139	-0.420954	-0.0379825	-0.291988	0.0940374	-0.244167	-0.163634	-0.266714	-0.141557	0.0144353	-0.125672	0.292612	-0.162073	0.00587485	-0.123255	-0.0969182	0.0745154	0.0977687
KEGG_INOSITOL_PHOSPHATE_METABOLISM	-0.0283249	0.242554	0.25894	0.0978572	-0.176754	0.233504	0.247434	0.262592	-0.0609633	0.00059763	0.0640978	0.301376	0.0614709	0.162938	0.0513552	-0.0774805	0.241334	-0.0209623	0.026469	0.324185	0.022464	0.353626	-0.107586	0.222205	0.132052	0.0893956	0.0945785	0.286792	0.0461622	0.215334	-0.0545703	0.137312	0.309472	0.264294	0.224069	0.032633	0.0797233	0.227637	0.113715	0.259142	0.0646601	0.142514	0.0523386	0.201445	0.19904	0.149647	0.0489434	0.108487	0.1995
KEGG_GLYCEROPHOSPHOLIPID_METABOLISM	-0.182607	-0.0413159	-0.0200354	-0.145065	-0.248662	-0.0650601	-0.144804	-0.105464	0.117301	-0.220467	-0.232057	-0.0970803	-0.213342	-0.0727039	-0.193215	0.0254605	-0.0897445	-0.136222	-0.256924	-0.218746	-0.113871	-0.0617107	-0.0507702	0.119943	-0.129609	-0.125978	-0.149931	-0.0170984	-0.0391265	-0.21559	-0.169233	-0.10834	-0.0441689	-0.00874001	0.213319	-0.19385	-0.14836	-0.120665	0.00703422	-0.189957	-0.0823361	-0.204703	-0.108226	-0.0106242	0.0112816	-0.154345	0.0497434	-0.0931459	0.0537914
KEGG_ETHER_LIPID_METABOLISM	0.15186	0.109324	-0.113003	0.120317	-0.200131	-0.316753	0.0414029	-0.104663	-0.00695254	-0.285477	-0.27351	0.142742	0.0360941	-0.146233	-0.0104887	0.212364	0.0108454	-0.21723	-0.0964246	-0.0779379	-0.285398	-4.41483e-06	-0.258509	-0.185754	-0.322553	-0.209908	-0.0283159	-0.158835	0.215521	-0.149398	-0.470561	-0.270131	0.185313	0.13579	0.0948394	-0.189732	0.381579	-0.24619	0.0762711	0.17881	0.280542	0.162794	0.205169	-0.0901458	-0.0853834	-0.221438	0.225415	-0.133356	-0.115256
KEGG_ARACHIDONIC_ACID_METABOLISM	-0.364079	-0.0337361	-0.0681115	0.0662579	0.00217794	0.157207	0.436304	-0.167497	-0.505492	-0.0918132	-0.537746	-0.0891373	-0.439943	-0.366352	-0.223835	0.208234	-0.0818364	0.0207193	-0.0326434	-0.361942	-0.00827894	-0.279312	-0.000188481	-0.150647	-0.279688	-0.108159	-0.0486532	0.0406469	-0.0676398	-0.276548	-0.108431	0.0891173	-0.157915	-0.0429816	0.0966783	-0.013419	-0.372599	-0.502087	-0.337068	-0.260434	-0.2763	0.0831389	-0.233087	-0.364129	-0.120781	-0.288461	-0.48836	-0.414389	-0.291419
KEGG_SPHINGOLIPID_METABOLISM	0.423639	0.061903	0.294194	-0.120288	-0.155549	-0.0446705	-0.0101196	0.156537	0.290132	0.335788	-0.325493	-0.199226	0.0713442	0.426839	-0.143475	0.10709	0.222047	0.0792502	0.0605513	0.112383	0.0981689	0.167512	0.332179	-0.0673649	-0.0601308	0.25003	0.116904	0.000511689	-0.0656454	-0.0433129	0.169074	-0.0582267	-0.0951585	0.317167	0.357706	0.0379486	0.479865	0.37	-0.0266968	0.318634	0.209623	0.104132	0.165494	0.246152	-0.0241789	0.133343	0.0130523	0.322659	0.203886
KEGG_PYRUVATE_METABOLISM	0.108971	-0.361898	-0.21932	-0.0731023	-0.155263	-0.242933	-0.120921	0.046529	-0.0970799	0.214906	0.041271	0.0419643	-0.18218	0.105666	0.399367	0.251281	-0.0481967	0.435233	0.0894628	-0.0236416	-0.15545	-0.107432	-0.111706	-0.171188	0.261593	-0.284952	-0.252099	-0.325465	-0.0392806	0.194563	-0.103569	0.341318	-0.259353	-0.063024	-0.00724818	0.143764	-0.0183709	0.187644	-0.383203	-0.17344	-0.243341	0.321683	0.173365	-0.0662879	0.0850991	-0.200739	0.0473371	-0.109581	-0.267059
KEGG_GLYOXYLATE_AND_DICARBOXYLATE_METABOLISM	-0.0417284	-0.355841	-0.0322808	0.328178	0.255718	0.354052	0.43385	0.231992	-0.281658	-0.352506	0.0613802	-0.443847	-0.249647	-0.379298	-0.240456	-0.301793	0.184636	0.000621099	-0.234533	-0.365306	0.157528	-0.113939	0.0832192	-0.186059	-0.337818	-0.369023	-0.69577	0.0801943	-0.358965	-0.272914	-0.459556	-0.438999	-0.377492	0.21744	-0.330703	-0.606278	-0.218031	-0.457663	-0.195956	0.226129	-0.415954	-0.0864207	0.186876	-0.38375	-0.468815	-0.471879	-0.247527	-0.282686	0.11373
KEGG_PROPANOATE_METABOLISM	0.0973622	0.00760814	0.139838	-0.0413822	-0.457752	-0.149772	-0.218192	-0.0604105	0.213173	0.0616086	-0.0598542	-0.0306834	-0.128353	0.0431046	0.218224	-0.00706064	-0.0202118	0.158515	-0.0090714	-0.286831	-0.323715	-0.0281994	-0.373651	-0.408107	0.00718916	-0.11365	-0.335089	-0.305491	-0.417019	-0.207659	-0.179378	-0.100189	-0.140389	-0.476652	-0.0576174	0.195783	-0.149893	-0.0323181	-0.387343	-0.503748	-0.367932	-0.0585102	-0.0953425	-0.303906	-0.265556	0.155443	-0.1244	-0.0742305	-0.292468
KEGG_BUTANOATE_METABOLISM	0.0634152	-0.0938834	-0.0855073	-0.161707	-0.211932	-0.299019	-0.159661	-0.293697	0.0437424	0.350454	0.127567	0.214547	0.0160274	0.178963	0.127073	0.0244284	0.0851038	0.432858	0.118657	-0.196425	0.229802	0.349406	-0.0192878	-0.0191866	0.226233	0.168919	0.0653642	0.17239	0.0138371	0.2899	-0.122915	0.173356	-0.282528	-0.0408788	0.0986203	0.193166	-0.0447347	0.466864	-0.0244016	0.0945909	0.314049	0.157595	0.365161	-0.00759564	0.0647694	0.198492	0.020412	0.171099	-0.0110408
KEGG_ONE_CARBON_POOL_BY_FOLATE	-0.38003	0.414194	0.613986	0.162463	-0.0222309	0.435436	0.267499	0.0401633	0.158874	0.0405467	-0.0416822	-0.555488	-0.457305	-0.282275	-0.374323	-0.610316	-0.0677896	-0.495604	-0.302825	-0.402203	-0.214698	-0.463344	-0.0493437	0.021199	-0.519209	-0.173284	-0.412213	-0.228155	-0.338081	-0.516196	-0.57219	-0.476542	-0.495834	-0.493278	-0.5169	-0.165381	-0.151515	-0.510343	-0.232151	0.140789	-0.407483	0.106919	-0.24846	-0.338406	-0.449337	-0.0969241	-0.352539	-0.521411	-0.156912
KEGG_NICOTINATE_AND_NICOTINAMIDE_METABOLISM	0.176329	0.042479	0.309818	0.0691486	-0.0514599	0.16747	0.089024	0.0338635	0.202507	0.200808	0.230961	0.198541	0.136575	-0.0193403	0.409638	0.203856	0.094112	0.236375	0.212642	0.17958	0.388671	0.326108	-0.0260882	0.0766157	0.428066	0.172696	0.188643	0.0296044	0.182204	0.214133	0.305867	0.302629	0.0893087	0.442435	0.12128	0.173184	0.0290143	-0.00224335	-0.00895068	0.150871	0.105901	0.271007	-0.113593	-0.202367	0.281874	0.213613	-0.270152	-0.0952817	0.170771
KEGG_RETINOL_METABOLISM	0.0535425	0.378424	0.123978	-0.156369	0.376219	0.479785	0.299698	0.207633	0.32212	0.029123	0.240734	0.0563401	-0.149763	0.275119	0.294656	0.305476	0.196623	0.254941	0.0713771	0.1702	0.132239	-0.174607	0.0564291	0.123654	0.36016	0.435266	0.280683	0.190645	0.0923659	0.239295	0.340442	0.35834	0.0677008	0.17161	-0.0707653	0.047726	-0.154839	0.00931729	-0.126351	-0.0913451	0.160616	-0.144936	0.372064	0.0408402	-0.0583261	-0.0367582	0.0913851	-0.125808	-0.0707933
KEGG_PORPHYRIN_AND_CHLOROPHYLL_METABOLISM	0.101435	0.0705313	0.223754	0.0429221	0.138424	0.371156	0.184612	0.0237129	-0.268943	0.139322	0.613548	-0.0411216	-0.185081	-0.38648	-0.0454702	-0.344756	0.199646	0.289157	0.199207	-0.0743435	0.367464	-0.203163	-0.254066	0.0263916	0.0287631	-0.02502	0.307979	-0.0118698	0.370048	-0.181116	0.281116	0.100908	-0.348816	0.0971656	-0.245229	0.11164	-0.270769	-0.302902	0.0384779	-0.390567	-0.0101114	0.0691416	-0.044005	-0.259358	-0.201185	-0.310384	-0.25089	-0.255473	0.0593899
KEGG_NITROGEN_METABOLISM	-0.594149	-0.36889	-0.583265	-0.185023	-0.137418	-0.0233381	-0.229109	-0.345868	-0.556601	-0.213316	0.138295	-0.380997	0.350721	0.303639	-0.0859619	0.35919	-0.178018	0.141733	-0.366747	-0.217322	-0.00189331	0.519728	0.298773	0.201731	0.367266	0.197651	0.298875	0.584659	0.0765043	0.200151	0.116257	0.18177	0.31068	0.332329	0.291375	0.208727	-0.190328	-0.0513512	0.0247305	-0.0176045	0.255803	-0.127081	-0.222039	-0.126928	-0.300547	-0.189804	-0.253201	-0.150178	-0.0805475
KEGG_AMINOACYL_TRNA_BIOSYNTHESIS	-0.210431	-0.192996	-0.0969818	0.124192	-0.188538	0.155726	-0.0580432	-0.101071	-0.206502	-0.0221969	0.00747475	-0.125522	0.137041	0.153429	-0.0735897	-0.12393	0.156563	0.0589944	-0.0963426	-0.310634	-0.129572	0.241873	-0.0916987	0.0652752	0.242037	-0.262869	-0.128816	0.31256	-0.25094	-0.141612	0.201197	0.0820207	-0.0342809	-0.169834	-0.137382	-0.013256	-0.368933	-0.313678	-0.329334	0.0961906	0.0356502	-0.299828	-0.112018	0.051597	-0.137843	0.106169	0.213372	0.111143	0.278329
KEGG_METABOLISM_OF_XENOBIOTICS_BY_CYTOCHROME_P450	0.195943	0.382625	0.116005	-0.15462	-0.0270202	-0.123769	-0.199478	0.0265618	0.166806	-0.04098	-0.056169	-0.230331	-0.200023	0.102427	0.127014	-0.123879	0.182686	-0.0582229	-0.0235164	-0.00393372	-0.237906	-0.0319802	-0.113677	-0.090085	0.00980547	0.0291817	0.0566294	0.00952234	0.24838	-0.106536	-0.193734	0.0168311	-0.035658	0.257219	-0.1783	-0.305265	-0.108988	0.03069	-0.240967	-0.157517	0.0211344	0.0298115	-0.108706	-0.101449	0.144116	-0.0343361	-0.121679	-0.0555651	-0.291553
KEGG_DRUG_METABOLISM_CYTOCHROME_P450	0.310036	0.279821	0.0942204	-0.177991	0.00748296	-0.0201989	-0.129586	0.145926	0.267774	0.0532087	-0.00383101	-0.263897	-0.131052	0.145876	0.0560924	-0.201799	0.16185	-0.0391171	0.107036	-0.000826159	-0.194491	0.0807891	-0.0934892	-0.231381	0.108843	0.0553455	0.00488498	0.146567	0.145195	-0.0796388	-0.237325	0.0200182	-0.0231965	0.300523	-0.110534	-0.268794	-0.0325548	0.160298	-0.134744	-0.0541111	-0.0234305	-0.194757	-0.135398	-0.034842	0.119901	-0.0659563	-0.0565373	-0.0518859	-0.209933
KEGG_DRUG_METABOLISM_OTHER_ENZYMES	0.0577674	-0.0447881	0.351544	0.191808	0.13858	0.341713	0.0674442	0.287926	0.030668	0.0283208	0.401643	-0.38766	-0.144209	0.0600506	0.106512	-0.00111188	0.0854764	0.00383049	0.0468711	0.0590072	0.126883	0.106482	0.272943	0.0506773	0.273101	0.0858364	0.202586	0.367133	0.0521017	0.00131121	0.0945779	0.158151	0.221216	0.0902596	-0.158622	-0.0462426	0.214339	-0.280393	0.0373141	-0.29213	0.0675313	-0.207557	-0.0302597	-0.241716	0.14844	0.123422	0.0101351	-0.0869386	0.178513
KEGG_BIOSYNTHESIS_OF_UNSATURATED_FATTY_ACIDS	-0.461314	-0.052548	-0.175499	-0.0928128	-0.293658	-0.402808	-0.224129	-0.0447569	-0.159531	-0.190652	-0.173804	0.0788745	0.105821	0.155763	-0.186029	-0.0729022	-0.0349933	0.0120015	0.242453	0.349469	0.208135	0.382543	0.0913155	-0.133804	0.292741	-0.152157	-0.0687833	0.0595802	-0.1804	-0.11103	-0.467519	-0.140868	-0.397544	0.398057	-0.151778	0.107832	-0.0941463	0.00935502	-0.236778	-0.39389	0.332247	-0.296983	-0.285742	-0.533188	-0.209537	-0.168527	-0.215684	0.0707851	-0.296998
KEGG_ABC_TRANSPORTERS	0.371618	0.375747	0.391503	0.21869	0.131157	0.428183	0.489758	0.513795	0.407269	0.33846	0.258971	0.347426	0.12304	-0.275979	0.112991	0.0373281	0.072608	0.106368	-0.273368	-0.184512	0.0999403	0.191972	-0.184485	-0.107825	-0.185957	0.0568395	-0.211621	0.0837457	0.289324	0.185396	-0.334308	-0.0199005	-0.411642	0.160334	-0.0966439	0.0856042	0.151333	-0.152084	-0.237727	-0.218291	-0.118965	-0.384756	-0.122002	0.0588666	0.179214	0.367128	-0.245618	0.115438	0.214289
KEGG_RIBOSOME	-0.0867107	-0.0486709	-0.106968	0.0249426	0.145055	0.23254	0.103774	0.140252	0.0795637	-0.0893615	0.154223	0.0860689	0.130588	0.153662	0.0157229	0.00351248	-0.0352231	-0.102287	0.185267	-0.160109	-0.0549484	0.230736	0.137838	-0.0336133	0.215327	0.188121	0.20033	0.175071	0.0873329	0.140433	0.0119099	0.27817	-0.102356	0.152988	0.101553	0.169726	0.129813	0.228932	0.118501	0.0554938	0.112736	-0.124108	0.10875	0.110916	0.0882873	-0.0349297	0.0255259	0.0306414	0.0401496
KEGG_RNA_DEGRADATION	0.0539495	-0.0851017	0.119895	-0.202144	0.0870651	-0.078556	0.0206043	-0.147948	0.0434244	0.0915788	-0.0787918	0.163188	-0.00377741	-0.0261628	-0.0645682	-0.00189136	0.317491	0.284595	0.0194881	0.208974	0.0975709	0.158331	-0.0259692	-0.128537	-0.0184157	0.0644699	-0.0204468	0.0912397	0.0834995	0.17529	0.0371183	0.150148	-0.0491776	0.223589	-0.199374	-0.210722	0.0228108	0.0507571	0.199229	0.31953	0.28249	0.344703	0.0916685	0.0714093	0.20209	-0.0194004	-0.230041	0.0283151	-0.137612
KEGG_DNA_REPLICATION	0.0782311	0.157223	0.227422	0.286875	0.0877026	0.203033	0.0581571	-0.0839896	0.237461	0.198464	0.0704791	0.0385994	0.189351	0.180235	0.0612199	-0.196613	0.00464668	-0.102948	0.00742607	0.28144	-0.0160487	0.17266	-0.193199	0.0926532	0.193996	0.105105	0.206224	0.272803	-0.179245	0.0156924	-0.276302	0.0279191	0.0257772	-0.0271735	0.116221	0.0579069	-0.197824	-0.102867	0.173841	-0.103719	0.128168	-0.300756	0.170792	-0.106988	-0.284243	0.0289852	-0.0419618	-0.309847	-0.106833
KEGG_SPLICEOSOME	-0.121124	-0.0483968	0.0516711	-0.0537057	-0.13252	-0.0916398	-0.145609	-0.020342	-0.0256902	-0.17644	-0.12952	0.0179138	-0.0031618	0.0686165	0.172079	-0.0859249	0.0843131	-0.009048	0.129773	-0.209636	-0.119379	0.214249	0.106163	0.153643	0.100194	0.157944	-0.105936	0.208641	0.0797403	-0.0489626	-0.0911684	0.191642	-0.148511	0.064898	0.166339	-0.0657718	-0.158752	-0.00202593	0.0149453	0.082692	0.0375381	-0.00644266	-0.0531121	-0.121093	-0.0585292	-0.114649	-0.0355012	0.157932	-0.0399614
KEGG_PROTEASOME	-0.271141	-0.00563753	-0.318979	-0.0406046	-0.000635705	-0.151903	0.00894631	-0.100212	-0.040458	-0.0257804	0.141699	0.109111	-0.218041	-0.208363	0.352115	-0.160184	0.107948	-0.0469793	-0.0833321	0.0214874	-0.105956	0.0842264	-0.0837358	-0.118306	0.0276398	-0.0790922	-0.123142	0.241613	0.00966734	-0.427796	0.0777995	0.0806535	-0.268787	0.0264353	0.0313761	-0.288316	0.0601455	-0.154942	-0.277983	-0.156602	0.117724	-0.0300114	-0.189892	-0.109338	-0.20174	-0.178298	-0.015515	0.00986426	-0.129209
KEGG_PROTEIN_EXPORT	0.0521656	0.0937674	0.241222	0.26911	0.276486	-0.0920812	0.215375	0.208232	0.446374	0.296597	-0.0978243	0.285868	-0.131364	0.311759	0.00888873	0.0130059	0.289881	0.276804	-0.0291194	-0.164375	0.0690789	-0.0314071	-0.0148671	0.161477	0.0964005	0.133331	0.0864558	0.272683	0.40417	0.116259	0.0567173	0.368464	0.173271	0.1085	0.44724	0.300145	0.152799	0.097731	0.114922	0.363919	0.0507392	-0.178859	0.384481	0.201316	0.125223	0.0696011	0.260525	0.0549075	0.245476
KEGG_PPAR_SIGNALING_PATHWAY	-0.362611	-0.107858	-0.284614	-0.205999	-0.374097	-0.407052	-0.152695	-0.13434	-0.0985623	-0.137373	-0.232686	0.0362815	-0.138747	0.058926	0.0343652	0.0372537	-0.032853	-0.231033	-0.0763063	-0.134605	0.117801	0.13072	0.0277	-0.0307726	-0.0225942	-0.0209987	0.0244134	-0.136009	0.0769115	0.173764	-0.0906276	-0.0492135	0.0168459	0.0461858	-0.0171555	-0.0746403	0.160883	0.0499008	-0.0993413	-0.129858	-0.00286674	-0.162674	-0.0498349	-0.0838127	-0.0861239	-0.176061	0.022764	-0.0285312	0.00786013
KEGG_BASE_EXCISION_REPAIR	0.471844	-0.124617	-0.185824	-0.10842	-0.00988434	-0.0806821	-0.230942	-0.239321	0.0413168	0.411847	0.231009	-0.472632	-0.223574	-0.0783254	0.133138	0.014102	-0.326419	0.0603393	0.0169887	-0.379597	-0.448988	-0.143253	-0.0358053	-0.267673	0.537288	0.256476	0.0773343	-0.160117	-0.23168	-0.217606	-0.329877	0.0868687	-0.456481	0.342629	-0.297407	-0.141776	-0.306717	0.180512	0.0195221	0.158159	0.373092	-0.134919	0.298061	0.279819	-0.368919	-0.193839	0.00565855	-0.42084	-0.0867996
KEGG_NUCLEOTIDE_EXCISION_REPAIR	0.186652	0.12669	0.00383788	0.117449	0.136799	0.0161017	0.312106	0.14866	0.245351	0.411814	0.118771	-0.17614	0.0145419	0.152664	-0.0207424	-0.327963	-0.108612	-0.202494	-0.180108	-0.0697636	-0.335747	-0.0879986	-0.135311	-0.14551	-0.169732	0.193312	-0.174339	-0.1512	-0.252462	-0.114536	-0.217421	-0.249925	0.0324333	0.146701	-0.128677	-0.156773	-0.421445	-0.291844	-0.221489	-0.215751	-0.200036	-0.400803	-0.0977115	-0.188115	-0.101406	-0.0604947	0.13511	-0.363315	-0.227632
KEGG_MISMATCH_REPAIR	-0.194972	0.0249932	0.127126	0.231543	-0.207491	0.164038	0.265625	-0.0322868	0.263666	0.0161146	-0.156257	0.185762	0.135302	0.189314	0.303734	-0.121276	0.121928	-0.152206	0.0387626	0.201632	0.0536199	-0.0335075	-0.144028	0.216636	-0.0497226	0.173916	0.336864	0.157451	-0.192133	0.0222124	-0.216939	0.0900437	0.096962	0.164204	-0.119635	0.0997738	-0.115373	-0.0524923	0.264748	-0.039967	0.0579593	-0.291688	0.0984625	-0.095935	-0.00850484	0.0904635	-0.188486	-0.0341533	-0.176352
KEGG_MAPK_SIGNALING_PATHWAY	-0.1475	-0.1381	-0.13079	-0.203964	-0.0843057	-0.144294	-0.168812	-0.177766	-0.102715	0.000237434	-0.146511	-0.0219853	-0.133274	0.15769	0.0676785	-0.0173339	-0.160503	-0.0654696	0.0822497	-0.159631	-0.0430928	0.0640525	0.097241	0.157693	0.061218	0.0288105	0.0880714	-0.071055	0.0775524	-0.0863346	0.0447843	0.258952	0.158824	0.107009	0.209954	-0.0484864	0.0276666	-0.130175	0.0646744	0.16672	0.0722868	0.336999	0.164078	0.00255086	-0.026651	-0.0826219	-0.0419007	0.207891	-0.0951348
KEGG_ERBB_SIGNALING_PATHWAY	-0.282307	0.0372799	-0.135904	-0.179192	-0.151201	0.0101343	-0.00656577	-0.0237616	-0.06575	0.0722256	0.0806223	0.221309	0.158433	0.169582	0.232558	0.219118	0.0570867	0.200818	0.0064392	-0.105435	0.0352076	0.206225	0.178899	0.156819	0.151298	0.240585	0.0427768	0.200807	-0.0744146	0.0514792	0.151694	0.0765312	0.0975232	0.278331	0.188516	0.202808	0.196402	0.0857708	0.0112849	0.0940126	0.154194	0.168933	0.145642	0.0986134	0.0580034	0.00235858	0.0855398	0.226255	0.122483
KEGG_CALCIUM_SIGNALING_PATHWAY	0.0542986	-0.0161314	0.035455	0.0853636	-0.14526	0.0158227	0.116309	0.124968	-0.0322326	0.112027	-0.0394256	0.00378726	-0.0299888	-0.0764008	0.132098	-0.0859327	0.177724	0.248006	-0.292731	0.0761595	-0.00246081	-0.0417267	-0.268553	-0.0711718	0.12872	-0.00108455	-0.228589	0.223666	-0.171425	-0.0186283	-0.0161524	0.106716	0.164949	-0.164481	-0.0556147	-0.179608	-0.229126	-0.15311	-0.164078	-0.0788723	-0.131635	-0.0360069	-0.21813	-0.0997287	-0.0884053	-0.0109428	-0.240393	-0.199144	0.0267201
KEGG_CYTOKINE_CYTOKINE_RECEPTOR_INTERACTION	-0.0878303	-0.389861	0.176675	0.0330596	0.136376	0.0673728	-0.107272	0.0301866	-0.114689	-0.062076	-0.159503	-0.182691	-0.141697	0.103894	-0.00851555	0.0852484	-0.0794684	-0.00715718	0.151251	-0.16453	-0.302762	0.0378027	-0.31396	-0.160947	-0.0477916	-0.194978	-0.226646	-0.252305	0.0785936	-0.279238	0.124402	0.225638	0.251128	-0.449077	-0.00708235	-0.268226	-0.253937	-0.220945	0.0712346	-0.0230963	0.113523	-0.105926	-0.305452	-0.177286	-0.111425	-0.122441	-0.396809	0.128769	0.0468092
KEGG_CHEMOKINE_SIGNALING_PATHWAY	-0.177239	-0.0277441	-0.0353794	-0.0752059	0.201807	-0.128135	-0.0221874	-0.0465782	-0.199068	0.2084	0.0469885	0.0178222	0.214215	-0.0374431	0.0132744	-0.126022	-0.0472809	-0.0491533	0.131052	-0.050377	-0.0921892	0.205095	0.0369921	-0.0748969	0.141071	-0.00262465	-0.169045	0.0232904	-0.0598509	-0.0913671	0.0312025	0.0191986	0.0495836	-0.107829	0.203012	0.0442753	0.109903	0.0682996	0.0715523	0.115733	0.073428	0.104287	0.0701456	0.161524	-0.0111881	0.0352536	-0.0620588	0.109702	0.13693
KEGG_PHOSPHATIDYLINOSITOL_SIGNALING_SYSTEM	0.196715	-0.0702338	0.128534	0.0764104	-0.112258	0.129909	0.0579352	0.334817	-0.167095	0.128619	0.0769927	0.148168	0.0609743	0.237163	0.124637	0.140139	0.332274	0.269715	0.092921	0.234585	0.0178094	0.121864	-0.0454482	0.0592132	0.320485	-0.0314208	-0.0675526	0.338246	0.100134	0.297438	0.24429	0.332822	0.364366	0.200581	0.0263745	0.164597	0.0412536	0.178377	0.0514417	0.155535	0.153779	0.221884	0.0933917	-0.0112996	0.158621	0.299617	0.00311607	-0.120667	0.0602383
KEGG_NEUROACTIVE_LIGAND_RECEPTOR_INTERACTION	-0.401178	0.212984	0.142791	0.243708	-0.0682092	0.208672	-0.189712	-0.408536	0.185836	-0.122838	-0.215593	0.0954325	0.23134	0.254122	0.235401	0.445622	-0.167734	0.2436	0.594122	0.247696	0.29536	-0.00135295	0.377308	0.232194	-0.151928	0.233531	-0.0699211	-0.401847	0.199226	0.0126714	0.084725	0.0911531	0.366864	-0.0870348	-0.0977658	0.234271	0.343821	0.124237	0.141704	-0.040954	-0.401414	-0.294536	0.100239	-0.0456168	-0.026226	0.449113	0.342974	0.242663	0.327999
KEGG_CELL_CYCLE	0.206515	0.136218	0.294718	0.291827	0.129693	-0.208745	-0.107161	0.106662	-0.117949	-0.285303	-0.206936	0.0454328	0.0643097	-0.0696834	-0.136601	-0.0606924	-0.0084364	0.0724035	-0.263149	-0.119205	-0.100773	-0.0822497	0.0266868	-0.0606622	-0.049969	-0.211098	-0.133336	0.131247	0.14786	0.0314724	-0.0979687	0.0925116	0.0733601	-0.285513	0.0606526	-0.0149725	-0.294973	-0.171722	-0.00941711	0.0104034	-0.0585729	0.0290987	-0.0621982	-0.212777	-0.0775901	-0.241522	0.0207965	-0.190637	-0.115558
KEGG_OOCYTE_MEIOSIS	0.188234	-0.148807	-0.0615766	-0.0550988	-0.292531	-0.376237	-0.367328	-0.241381	-0.171701	-0.174947	-0.0568714	-0.0560675	0.101492	0.109319	-0.0130133	-0.0330651	0.03448	0.0480282	-0.122425	-0.20996	-0.112233	-0.28904	-0.0564934	-0.148711	0.020891	-0.247351	-0.346062	-0.0657708	-0.308087	0.0244936	0.17426	0.0854524	0.22581	-0.137524	-0.0513434	0.109513	0.0167021	-0.112124	0.148207	-0.00165374	-0.172486	0.233865	0.0480277	-0.100901	0.121216	-0.256176	-0.0798891	0.106111	-0.306276
KEGG_P53_SIGNALING_PATHWAY	-0.190201	-0.241243	-0.238794	-0.0802787	-0.383236	-0.0887065	-0.492569	-0.196239	-0.137067	-0.230062	-0.186519	-0.102868	-0.233448	0.121864	-0.172571	0.015743	-0.104261	0.182	-0.0887749	0.145741	-0.0134603	-0.0812777	-0.08848	0.0325443	-0.0788362	0.195003	0.0251402	-0.301368	0.185074	-0.190854	0.115325	0.213768	-0.174516	-0.100028	-0.198007	-0.20814	0.0246254	-0.0572441	-0.0373006	-0.240913	-0.01746	0.08528	0.0189393	0.108081	0.0352806	0.182262	-0.163401	-0.178321	-0.0337177
KEGG_UBIQUITIN_MEDIATED_PROTEOLYSIS	-0.16389	0.144944	-0.113242	-0.0936921	0.0589264	-0.156269	0.241675	0.163908	-0.307708	0.108184	-0.00843696	-0.0450029	-0.248495	-0.199422	-0.177801	-0.119769	-0.0131318	0.0201723	-0.329349	-0.0952613	-0.34921	0.132638	0.21846	0.220278	0.0199513	-0.00312612	-0.0454055	0.0870188	0.031564	-0.2078	-0.0747259	-0.378138	-0.0340814	0.0952049	0.0598385	0.0338051	-0.0371735	-0.0705772	-0.105334	-0.230436	-0.110237	-0.251565	-0.145883	-0.0573904	-0.147335	-0.152246	-0.0373569	-0.156722	-0.119431
KEGG_SNARE_INTERACTIONS_IN_VESICULAR_TRANSPORT	0.0936914	0.239204	0.181245	0.078269	-0.0558727	-0.373459	-0.00530739	0.0367743	-0.238587	0.0909699	0.230223	-0.0814759	-0.155978	-0.330124	-0.191649	-0.15558	0.131123	-0.185902	-0.0168562	-0.350202	-0.264293	-0.0631561	0.00147842	-0.256528	-0.228025	-0.0917759	-0.278491	0.0569156	-0.0853449	-0.00388754	-0.273754	-0.230331	-0.117957	0.0548082	0.0378498	-0.335311	-0.298811	-0.0651077	-0.122961	-0.0396041	-0.0702586	-0.147204	0.101578	-0.341236	-0.181414	-0.0100621	-0.0907099	-0.15745	-0.0610296
KEGG_LYSOSOME	-0.0557828	-0.156311	0.00567517	0.120982	-0.0728983	0.023295	0.0889516	-0.0638281	0.0614524	0.0944044	-0.176042	0.19388	0.1152	0.133207	0.084857	0.0695234	0.159287	0.0705213	-0.0168112	0.0976836	-0.0643125	0.00173837	0.0272969	0.0855153	0.111205	0.324312	0.165775	0.0723437	-0.0623303	0.0649776	-0.0905563	0.0224244	0.18238	-0.0337917	-0.228631	0.00690141	0.19212	-0.102084	0.116951	-0.029248	0.156446	-0.0200622	-0.036714	0.00348117	-0.054824	0.0739167	0.238129	0.0311443	-0.0443543
KEGG_ENDOCYTOSIS	0.106061	0.0927159	0.00111341	0.0625809	0.0283216	-0.0909948	0.0402222	0.151671	0.116957	0.168995	0.0230653	0.0377578	-0.161607	-0.0530991	0.000747169	-0.073674	-0.0514741	-0.0761483	-0.0613483	-0.118855	-0.0885276	-0.135456	-0.118269	-0.0206066	-0.126873	-0.0257211	-0.040961	-0.163891	0.0684604	-0.128269	-0.203372	0.10556	-0.0894473	0.0156237	-0.0621721	-0.0144162	-0.160458	-0.0781778	-0.166401	-0.0916026	-0.0149944	0.17694	0.0176361	-0.16867	-0.0805123	-0.0582279	-0.209384	0.269798	-0.0710876
KEGG_PEROXISOME	-0.0491174	-0.317533	-0.255315	-0.263793	-0.313293	-0.152989	-0.2374	-0.210755	-0.207075	-0.124623	-0.0177395	-0.0846834	0.0777578	-0.0557273	0.0645686	-0.0272795	-0.102208	-0.0743026	-0.18934	-0.280139	-0.160734	0.0736864	-0.00876024	-0.274813	0.0127987	-0.112459	-0.219442	0.0487958	-0.0720018	0.195907	0.0124191	-0.00408269	-0.0916731	0.14658	0.126032	-0.234047	-0.0191418	-0.120243	-0.166696	-0.25738	0.19773	-0.0785289	-0.282158	-0.299965	-0.248922	-0.18156	-0.257257	-0.165077	-0.0700461
KEGG_MTOR_SIGNALING_PATHWAY	0.147114	0.145436	-0.0518908	-0.34247	-0.0347451	-0.264823	-0.124276	-0.376153	-0.291024	-0.106711	0.436512	-0.0291697	-0.097463	0.229252	-0.0870463	-0.184096	0.122045	0.232485	-0.052304	-0.0338388	-0.150793	-0.122888	0.277914	0.386405	-0.203411	0.214381	-0.274383	-0.0182639	-0.382584	-0.126779	-0.0984005	0.134978	-0.0017301	0.092273	0.0275354	0.0637049	0.44465	-0.00226655	-0.00726307	-0.00823057	-0.142493	0.427464	0.289017	0.278335	0.128219	-0.0912528	0.121745	0.400452	-0.185121
KEGG_APOPTOSIS	-0.215851	0.322985	0.323443	0.320562	-0.247161	0.11668	-0.0697004	0.0965489	0.040754	0.0967942	-0.198206	-0.0620394	-0.214535	0.027123	-0.174749	-0.100861	-0.138993	-0.173434	0.147328	0.0760138	0.0663406	0.171269	-0.0164582	-0.0671266	0.138268	-0.0247283	-0.0256327	-0.0405626	-0.213841	-0.272022	0.023394	-0.111327	-0.158389	-0.161546	-0.0594729	-0.196209	-0.184389	-0.160832	-0.0742285	-0.314693	0.015254	-0.296719	-0.127688	-0.245607	-0.124706	0.0189232	-0.0265402	-0.121174	-0.156936
KEGG_CARDIAC_MUSCLE_CONTRACTION	0.314258	-0.0901778	0.0842477	-0.156656	0.0963551	-0.0405795	0.0308407	-0.264005	-0.026465	0.204287	-0.462421	-0.362901	-0.163843	-0.214555	-0.190252	0.191915	0.0239872	0.0941177	-0.335296	0.0281606	0.070347	0.0854309	-0.246142	-0.131053	-0.126599	-0.0339946	-0.364501	-0.0492807	-0.339951	0.257367	-0.235152	-0.0835842	-0.373258	-0.124297	-0.106691	-0.0309381	-0.299219	0.189586	0.198914	0.101858	-0.371869	-0.000564402	-0.141985	0.139519	-0.442687	-0.0787595	0.446352	0.170722	-0.245759
KEGG_VASCULAR_SMOOTH_MUSCLE_CONTRACTION	0.140256	-0.203175	-0.143585	-0.0805187	-0.193198	-0.184009	-0.265833	-0.325201	-0.0645156	0.123109	-0.234597	0.0213178	0.176104	-0.0414307	-0.299366	-0.26394	-0.204249	-0.0804453	-0.00581221	-0.219845	-0.0903383	-0.26576	-0.36271	-0.444997	0.0424158	-0.229507	-0.448885	-0.0873872	-0.04222	-0.128457	0.054053	0.15191	0.272163	-0.0946077	-0.182806	-0.0250368	0.0899244	-0.153792	0.156948	-0.146083	-0.214026	0.201641	-0.064898	-0.170254	0.0904986	-0.177877	-0.0706964	-0.0166177	-0.335521
KEGG_WNT_SIGNALING_PATHWAY	-0.284727	-0.0926213	-0.0986642	-0.182042	-0.00784394	-0.00772423	0.0289375	-0.00823221	0.0622173	0.0241266	-0.12382	0.087815	0.229428	0.200768	0.137433	0.070257	0.199494	-0.105306	0.215316	0.1193	0.245407	0.322346	0.109669	0.0603513	0.303722	0.214014	0.144606	0.27032	-0.0190317	0.0148243	0.117083	0.13685	0.0657642	0.102939	0.325842	-0.0113165	-0.189914	-0.0472498	0.0973497	-0.105672	0.211245	-0.0603998	0.0692154	-0.113791	-0.0394737	0.00865369	-0.0483836	-0.0264253	0.179276
KEGG_NOTCH_SIGNALING_PATHWAY	-0.363772	0.0435961	0.11419	-0.092051	0.0628138	0.208439	-0.27179	0.0831912	0.263965	-0.164625	0.107339	-0.0794177	0.345333	-0.116186	0.0407042	-0.0274129	0.343571	-0.335031	-0.214853	-0.110287	0.144454	-0.0983626	0.228631	0.165494	-0.142847	0.161218	0.19712	0.101036	0.247039	0.00685936	-0.269059	0.0517016	-0.255973	-0.109908	0.297252	0.0348038	-0.060051	-0.201327	0.226541	0.0712233	-0.221166	-0.116102	0.238424	-0.300235	-0.134355	-0.153444	0.378343	0.372373	0.470242
KEGG_TGF_BETA_SIGNALING_PATHWAY	-0.0221425	0.0170073	-0.0725286	-0.115807	0.0679721	0.0694966	0.0486852	0.046462	-0.00637771	-0.239747	0.0651827	0.0147599	0.0900883	0.0311683	0.26361	-0.0681388	-0.125357	-0.165307	-0.0752185	-0.128604	-0.250811	0.0305809	-0.0254073	-0.259024	-0.0490318	-0.0612755	-0.363009	-0.075327	-0.0482518	-0.159175	0.168287	0.0899641	0.229191	0.0341212	0.250918	0.117006	0.0842038	-0.0288685	0.0260719	-0.115487	0.109014	-0.105155	-0.201673	-0.108825	-0.157365	-0.289754	-0.271719	-0.0698998	-0.0219731
KEGG_AXON_GUIDANCE	-0.244392	0.132928	-0.0133273	-0.268528	0.275106	-0.060737	0.0231486	-0.154324	-0.222131	-0.00145749	-0.109048	0.188888	0.200059	-0.0922714	0.0771522	-0.0356811	0.0494153	-0.0348345	0.110572	0.16642	-0.027412	0.0637495	-0.0448182	-0.072811	0.191878	0.130316	-0.112524	0.224275	-0.273429	0.0757064	0.131173	0.0629128	0.0804005	0.111794	0.252879	-0.109504	-0.131232	-0.0511464	0.0674414	-0.104164	0.0258417	0.0264737	0.0242754	-0.0691604	-0.0046955	0.131103	-0.155606	0.0761678	0.047103
KEGG_VEGF_SIGNALING_PATHWAY	-0.283768	0.319062	-0.011036	-0.12769	0.02499	-0.0158525	0.215631	0.24549	0.0136226	0.149154	0.147855	0.225929	0.0422613	0.318226	0.281594	0.0391822	0.19415	0.177933	0.251693	-0.086048	0.247934	0.130248	0.331215	0.316691	0.249321	0.254285	0.155359	0.275786	-0.254997	0.111852	0.273232	0.196674	0.141751	0.223423	0.276734	0.0662362	0.142112	-0.0904598	0.110607	0.0865716	0.142708	0.224748	0.208701	0.0989918	-0.14208	-0.0699634	-0.2408	0.026005	0.0676271
KEGG_FOCAL_ADHESION	0.0831918	-0.0466393	0.0678602	-0.0711608	-0.227859	-0.245499	-0.206471	-0.100395	-0.139053	0.0199885	-0.13944	0.0136313	-0.0134955	-0.126414	0.00309637	-0.169323	-0.0142421	-0.0243744	-0.0749977	-0.0710423	-0.106629	-0.21667	-0.00167876	-0.07088	-0.0549114	-0.17936	-0.0739774	-0.102851	-0.100582	-0.081794	-0.0069657	0.0575338	0.0582995	-0.0204368	0.126463	-0.0844298	-0.0942012	-0.227346	0.21668	0.0815206	-0.0422255	0.190707	0.000695558	0.0200983	0.112217	-0.205714	-0.0896476	-0.164658	-0.114194
KEGG_ECM_RECEPTOR_INTERACTION	-0.0595979	-0.0125165	0.113011	-0.0314517	-0.128605	-0.166357	-0.240339	-0.105648	-0.101554	0.0788035	-0.373534	-0.0142954	0.132788	-0.135262	0.0419505	-0.00211472	0.0236564	0.0103445	-0.0170899	0.0616628	-0.235619	-0.318886	-0.0128392	-0.0560947	-0.18989	-0.274874	0.00721461	-0.194011	0.00208149	-0.115774	0.122589	-0.0772963	0.0927782	-0.29749	-0.106648	-0.073177	-0.149225	-0.295448	-0.0606901	-0.138557	-0.13809	-0.044269	-0.0925326	-0.0243598	0.0198478	-0.176497	-0.294941	-0.328615	-0.12903
KEGG_CELL_ADHESION_MOLECULES_CAMS	-0.207809	-0.082773	0.0838616	0.0997509	-0.172154	0.18877	-0.00823062	0.0821225	0.13758	-0.134401	-0.232877	0.276814	0.0614265	-0.0779509	-0.0374557	0.113639	-0.0414091	-0.074663	0.0503061	0.0614348	-0.0579253	0.117796	-0.0328706	-0.17077	-0.0240137	-0.170398	-0.0355991	-0.208519	-0.0181891	0.0497115	0.0800525	-0.0463822	0.180837	-0.0426997	-0.279698	0.00834709	-0.21711	-0.135055	0.0432187	-0.166337	-0.125575	-0.155619	-0.170592	-0.165392	-0.197156	-0.0534384	-0.0608623	-0.25633	-0.270807
KEGG_ADHERENS_JUNCTION	0.068165	-0.23716	-0.250047	-0.221122	-0.0545104	-0.341985	-0.0492947	-0.0125567	-0.217977	-0.0417076	0.0622448	0.22481	0.145534	0.132955	0.296663	-0.0639666	0.197952	0.0559202	-0.0277954	-0.208183	-0.0802952	-0.172038	0.240838	-0.17374	0.245444	-0.134077	-0.253661	0.0950509	-0.0551845	0.226936	-0.0793111	0.303111	-0.0142672	0.026812	0.202012	0.0575266	-0.20536	-0.172049	0.183956	0.0186085	-0.0641934	0.228834	-0.0347871	-0.116589	0.0278416	-0.16368	0.048152	0.127473	-0.109829
KEGG_TIGHT_JUNCTION	0.0423474	-0.27849	0.150832	-0.0734653	0.119322	-0.208329	-0.25609	-0.120203	-0.0101288	0.0907969	-0.169591	0.0757085	-0.134229	-0.106201	0.111275	0.296663	0.00937237	0.169554	0.0348868	-0.284032	0.0192973	0.109795	0.100507	-0.0198801	0.0240877	-0.203143	-0.0619989	-0.0730638	0.137622	0.217057	-0.200981	-0.00292577	-0.00301772	-0.176238	0.193553	-0.166116	-0.128618	0.110812	0.280357	0.00456288	-0.146385	0.101855	-0.0259915	0.115507	0.0217754	0.165416	0.3908	0.262714	-0.122602
KEGG_GAP_JUNCTION	0.152107	0.262593	-0.403418	-0.00735764	-0.285917	-0.146018	0.119733	0.056988	-0.148718	-0.198955	-0.275874	0.239838	-0.0746667	-0.369864	-0.221554	-0.275706	-0.265014	-0.0022518	-0.447637	0.178363	0.184344	0.0982145	-0.136171	-0.340901	0.149255	-0.253333	-0.291968	-0.0830503	0.216158	-0.173976	-0.339171	-0.219559	-0.348895	-0.188392	-0.0254727	-0.288026	-0.0706421	-0.349028	0.0300118	-0.0955731	-0.143417	-0.0636273	-0.026669	-0.0577768	0.166711	-0.0301556	-0.265917	0.273573	-0.273092
KEGG_COMPLEMENT_AND_COAGULATION_CASCADES	0.0806678	0.146759	0.0431199	-0.123908	-0.594801	0.202926	-0.0424422	-0.271146	-0.275479	-0.148121	0.213074	0.272454	-0.528243	-0.356273	-0.0256319	-0.0153952	0.126982	0.170525	-0.176153	0.373769	-0.100686	-0.748075	-0.478004	0.120233	-0.610021	-0.450672	0.381686	-0.739871	0.433215	-0.454319	0.239162	-0.153043	-0.363107	-0.611751	0.0991539	-0.0193198	0.226723	-0.31668	0.0374685	-0.367055	-0.713963	0.239858	-0.0213804	0.302667	0.158518	0.0270827	0.0607253	-0.344042	0.117549
KEGG_ANTIGEN_PROCESSING_AND_PRESENTATION	0.454246	-0.17048	-0.256224	0.234147	-0.20895	-0.291438	-0.448956	-0.180292	0.0538822	0.118502	-0.442231	-0.146469	-0.464256	0.0299	0.292407	-0.126927	-0.111039	0.249152	0.0588199	-0.387099	-0.25243	-0.269702	-0.0198755	0.103254	0.163615	-0.189735	-0.404125	0.0372513	0.282022	-0.349535	0.120904	0.295927	0.0161254	0.310221	-0.0487972	-0.229245	-0.215506	-0.138367	0.159758	0.213269	-0.0396986	0.342707	-0.0616968	-0.268	-0.590082	-0.194199	-0.317778	0.158544	-0.284208
KEGG_RENIN_ANGIOTENSIN_SYSTEM	-0.0536375	-0.111592	0.209317	0.0197394	-0.371159	-0.374019	-0.0163619	-0.266511	-0.441357	0.234504	-0.223532	0.151978	-0.14289	-0.000635712	0.370069	0.418478	0.0200959	0.307117	0.0583596	0.0657649	-0.0745437	-0.229122	-0.283119	0.0368337	0.0263637	0.276949	0.0893205	-0.0745236	0.162171	-0.047597	0.0156564	0.290034	0.485118	0.193264	-0.0569672	0.0165633	0.391468	-0.12768	-0.0264355	0.147409	0.0504669	0.192985	-0.178789	-0.279492	0.0639962	-0.0829779	0.326716	-0.0291867	0.395321
KEGG_TOLL_LIKE_RECEPTOR_SIGNALING_PATHWAY	-0.250464	0.012026	-0.309709	-0.205972	0.0941198	-0.0371279	-0.0533184	-0.110123	0.0485137	-0.0438445	0.00426515	0.135138	-0.105335	0.18086	0.0829556	-0.141268	-0.0679015	0.044301	0.0198932	0.00615913	-0.0243372	0.0298174	0.0400457	0.27215	0.128464	0.237995	-0.0473598	0.0963557	0.0106275	-0.181362	0.0406342	0.0143582	-0.0511452	0.00532786	-0.0285904	-0.0134893	-0.029488	-0.0875655	0.188572	-0.0105054	-0.0185532	0.109873	0.0921355	-0.0297858	0.00506422	0.0419541	0.0445986	-0.136764	-0.0730898
KEGG_NOD_LIKE_RECEPTOR_SIGNALING_PATHWAY	0.050052	0.0713522	-0.227825	-0.126094	0.0691976	0.212615	-0.083766	0.0488212	-0.0655902	-0.112028	0.264155	-0.115298	-0.0436672	-0.0390677	0.186517	-0.23566	-0.469957	0.032427	0.0758172	-0.265257	0.179561	0.13428	-0.215693	0.155063	0.154306	0.160346	-0.188301	-0.0517377	-0.127807	-0.299253	0.127207	-0.132269	-0.143141	-0.130885	-0.248702	0.197433	-0.259048	-0.0736749	0.192776	0.145447	0.250873	0.279785	0.167062	0.0707481	-0.199642	-0.116134	-0.221219	0.098923	-0.278893
KEGG_RIG_I_LIKE_RECEPTOR_SIGNALING_PATHWAY	-0.119703	-0.0041933	-0.114932	0.0156061	0.0218472	-0.00702148	-0.0536391	0.0752406	0.0225298	-0.113388	0.0770765	-0.0635013	0.0288043	-0.00865891	-0.222203	-0.0964268	-0.220223	-0.137198	0.0824513	-0.0754202	-0.139529	0.163173	0.187295	0.0448656	0.0986228	0.0819597	0.00644717	0.135314	-0.0611106	-0.12929	-0.0778794	-0.0890891	-0.0393466	0.153081	-0.230755	0.009944	-0.0943824	-0.125888	-0.120745	0.0513153	0.122273	-0.245363	-0.18197	-0.215589	-0.0630991	0.141543	0.172492	-0.210241	-0.228274
KEGG_CYTOSOLIC_DNA_SENSING_PATHWAY	0.230921	0.342641	0.0194998	0.445638	0.165602	0.6242	0.293473	0.546695	0.387575	0.0556895	0.343208	-0.220282	-0.147301	-0.319889	-0.283756	0.101553	-0.319911	-0.431108	0.00377772	-0.368643	-0.0530827	-0.0714649	-0.163542	-0.0958855	0.000247464	0.158358	-0.102973	-0.182447	-0.459345	-0.460324	-0.270417	-0.293219	-0.0634082	0.00094836	-0.213779	-0.361638	-0.447268	-0.0826214	0.0536271	0.0674868	0.227675	-0.191828	-0.119787	-0.171437	-0.109565	-0.15735	0.178593	-0.0276065	-0.392776
KEGG_JAK_STAT_SIGNALING_PATHWAY	0.0100782	0.311454	0.25689	0.20551	0.259972	0.325257	0.234517	0.119203	0.342718	0.332793	0.310361	-0.0287548	0.19347	0.161569	-0.0187244	0.233904	-0.0152911	-0.169059	0.102623	0.012276	0.100449	0.183456	0.167959	0.0390679	0.225649	0.12604	0.0283448	0.227743	-0.0487109	0.129909	-0.0076385	-0.0114756	0.241694	0.142727	0.132065	0.0617476	0.0746022	0.0573479	0.0144991	0.0639452	0.0928108	0.0942532	-0.0797843	0.192724	0.155642	0.073053	0.226576	0.259032	0.0402772
KEGG_HEMATOPOIETIC_CELL_LINEAGE	-0.154019	-0.0494855	0.106774	0.223066	0.0983648	-0.0505756	-0.248855	0.0357881	-0.158422	-0.0261471	-0.378586	-0.136384	0.0160909	-0.0747365	-0.279363	-0.187369	-0.169157	-0.218944	0.0309698	-0.0852832	-0.383862	-0.325566	-0.278118	-0.357545	-0.330882	-0.470314	-0.260361	-0.199791	-0.222981	-0.121856	-0.302744	-0.35471	-0.0889806	-0.474645	-0.261983	-0.196232	-0.0488779	-0.241433	-0.055355	0.0103588	-0.255379	-0.0754557	-0.111884	-0.407765	-0.158524	-0.210513	-0.262935	-0.210021	0.0650783
KEGG_NATURAL_KILLER_CELL_MEDIATED_CYTOTOXICITY	-0.250298	-0.00908736	-0.271095	-0.13586	-0.134166	0.0347998	0.0933499	-0.133841	-0.202235	-0.176522	-0.138099	0.211464	-0.0556078	0.215045	0.16597	-0.0874475	-0.0292763	0.0447684	0.123776	-0.017578	0.195857	-0.158246	-0.105143	0.124316	0.0555667	0.110702	0.210839	0.0895844	-0.0522468	0.0496529	0.113382	0.0481414	0.137751	0.00809738	-0.0346498	0.0344993	-0.208306	-0.343783	0.145405	-0.0636732	0.0459555	0.0803332	0.0707057	-0.127306	-0.251781	-0.0970428	-0.292445	0.0668009	-0.101576
KEGG_T_CELL_RECEPTOR_SIGNALING_PATHWAY	-0.130503	0.106214	0.00146983	-0.181945	-0.0821772	0.150107	0.172933	0.0866706	0.0422153	0.171852	0.069227	0.25888	0.0920932	0.190833	0.15295	0.227788	0.000325638	0.110816	0.179783	0.0957877	0.0536788	0.25348	0.227639	0.251202	0.227536	0.201092	0.125071	0.171613	-0.00735233	0.0590292	0.145063	0.0154719	0.116399	0.223422	0.128849	0.112791	0.163068	-0.125335	0.124056	-0.0686037	0.213199	0.209985	0.141335	0.129543	0.104642	0.038687	0.101073	0.149545	-0.00792728
KEGG_B_CELL_RECEPTOR_SIGNALING_PATHWAY	-0.258102	0.195773	-0.0811108	-0.169649	-0.0675631	-0.00205926	0.246978	0.0175919	-0.0735828	0.0952032	0.00380728	0.180754	0.0574533	0.200789	0.0827075	-0.0805936	0.0857719	-0.052688	0.205737	-0.0879682	0.0546882	0.212822	0.195363	0.281197	0.227399	0.180947	0.0980861	0.297778	-0.245293	-0.102408	0.123197	0.0650126	0.093157	0.208787	0.325611	0.0813978	0.0671692	-0.166588	0.00443556	0.0738351	0.125738	0.0728732	0.215144	-0.0600321	-0.145698	0.0589953	-0.12005	0.118065	0.0306309
KEGG_FC_EPSILON_RI_SIGNALING_PATHWAY	-0.31824	0.0727319	-0.312046	-0.204978	0.0706193	-0.107215	-0.0155812	-0.066046	-0.108392	0.0308642	0.0344382	0.048957	0.132991	0.287988	0.256237	0.026707	0.00180908	0.117176	0.190139	-0.0506039	0.122059	0.241336	0.275159	0.282339	0.206793	0.247792	0.159228	0.26106	-0.0392917	0.052605	0.188521	0.176695	0.0556781	0.199814	0.345859	0.21911	0.14612	0.0257365	0.108238	0.197284	0.104168	0.0960811	0.250889	-0.0228912	-0.225466	0.107964	0.015239	0.0753225	0.1349
KEGG_FC_GAMMA_R_MEDIATED_PHAGOCYTOSIS	-0.0709546	0.0264865	-0.119941	0.0210952	-0.0256771	-0.152272	-0.132155	0.11164	-0.208862	-0.110798	-0.0319287	0.0301605	0.0991247	-0.115047	-0.00846003	-0.22737	0.178351	-0.115902	0.0215392	-0.142044	-0.275593	-0.135096	-0.0510473	-0.131795	-0.029988	-0.0592256	-0.20006	-0.137677	-0.251641	-0.177407	-0.0488623	0.169587	-0.0911004	-0.0370241	0.0873126	-0.00931692	0.0981787	-0.0427249	0.0562722	0.0923101	-0.0707683	0.108514	0.0525135	-0.0889329	-0.130977	-0.000302057	-0.290074	-0.0672802	0.0684662
KEGG_LEUKOCYTE_TRANSENDOTHELIAL_MIGRATION	0.252489	-0.233995	-0.0087828	-0.0431161	0.11045	-0.0891764	-0.155294	0.0349387	-0.216836	-0.133855	-0.00916071	0.0246758	-0.195948	-0.144094	-0.0706328	-0.0883991	-0.138949	-0.080419	-0.0718394	-0.12726	-0.0604148	-0.141067	-0.112071	-0.148402	-0.026195	-0.178628	-0.0932658	0.0571823	-0.0782725	-0.0581421	-0.180065	-0.07298	0.0110162	-0.0498433	0.085527	-0.11406	-0.0713766	-0.255421	0.129968	0.0778679	0.0228155	0.192479	-0.0162082	-0.221337	-0.0176497	-0.287838	0.102067	-0.113166	-0.257084
KEGG_LONG_TERM_POTENTIATION	0.0699664	-0.316284	-0.0760715	-0.181963	-0.293468	-0.188016	-0.281425	-0.258894	-0.210692	0.155488	0.165487	-0.238061	-0.0724424	0.0860043	-0.31799	-0.211845	-0.227291	-0.0568102	-0.187299	-0.294083	-0.272199	-0.340679	-0.110632	-0.168208	-0.0546253	-0.32798	-0.282142	-0.19509	-0.39435	-0.0759038	-0.0063469	0.199587	0.229726	0.0345441	-0.123253	-0.0563248	0.0932984	-0.268179	0.180227	-0.0462475	-0.184895	0.251237	0.0283885	-0.12057	0.0476824	-0.362476	-0.320058	0.00226243	-0.340667
KEGG_NEUROTROPHIN_SIGNALING_PATHWAY	0.238099	-0.138848	-0.132747	-0.150654	-0.0120895	-0.120752	-0.176166	-0.0127293	-0.303722	-0.0170961	-0.0244043	-0.0847714	-0.00436062	0.208393	-0.106845	0.0487262	0.0372911	0.00279973	-0.0629821	-0.187311	-0.14474	-0.162789	-0.00778945	0.0830883	0.00531215	-0.135935	-0.215984	-0.0541359	-0.0850518	-0.0224676	0.123626	0.261565	0.109606	-0.0157989	-0.0204718	0.126264	0.0840241	-0.106482	0.158533	0.204597	-0.106996	0.313508	0.0263215	-0.0461919	-0.0160635	-0.106232	-0.0364312	0.00064106	-0.246972
KEGG_LONG_TERM_DEPRESSION	-0.202165	0.10284	-0.255054	-0.0858109	0.0688725	0.100419	0.0435228	-0.0271174	-0.110026	-0.073515	-0.111605	0.175364	0.0698181	-0.137062	0.195894	-0.0163308	0.00209717	0.141803	-0.113369	0.130435	-0.0720928	0.206667	-0.218888	-0.109928	-0.0776188	0.114972	-0.200045	0.249312	-0.123691	-0.0126307	-0.0613597	-0.0706559	0.0351519	-0.241972	0.192248	-0.0799103	0.10475	-0.0800135	-0.184092	-0.168621	-0.172176	0.119294	0.115028	0.164773	0.0168599	0.122392	0.0976944	0.11467	-0.162502
KEGG_OLFACTORY_TRANSDUCTION	0.0267406	-0.608384	-0.436934	-0.352033	-0.54419	-0.231481	-0.467275	-0.0548765	-0.213245	0.16279	-0.362556	-0.178821	0.00373064	0.125295	0.0273115	0.118028	0.0150012	0.308588	-0.219843	-0.162511	-0.0974608	-0.107258	-0.311396	-0.481283	0.343954	-0.455745	-0.52703	0.205318	-0.290531	-0.00628426	0.233295	0.194794	0.335924	-0.296542	-0.47754	-0.099648	-0.300924	0.225616	-0.127023	-0.199128	-0.0328711	0.0145062	-0.495559	-0.575841	-0.162745	0.169911	-0.18905	-0.283791	-0.273035
KEGG_REGULATION_OF_ACTIN_CYTOSKELETON	0.0402306	-0.110403	-0.0341541	0.0129103	-0.120611	-0.298309	-0.292617	-0.138296	-0.208992	-0.145829	-0.164449	0.0625328	0.0194224	-0.080121	-0.0701452	-0.0843159	-0.0210117	-0.0316464	0.0566303	-0.192823	-0.0811419	-0.220159	-0.111231	-0.202598	0.00198003	-0.184731	-0.19653	-0.0420518	-0.0654109	0.00809929	-0.0135266	0.114897	0.139124	-0.107123	0.105943	0.0590793	0.0601997	-0.0400836	0.265996	0.188709	-0.149832	0.253394	0.0915919	0.077708	0.132386	-0.114791	0.0755137	0.173944	0.0357886
KEGG_INSULIN_SIGNALING_PATHWAY	-0.109054	-0.0589831	-0.118299	-0.0688921	-0.0791761	-0.133847	-0.0848409	-0.0730348	-0.0108462	0.0813115	-0.0303558	0.0865736	-0.039912	0.164706	0.0305174	0.0135592	0.0567026	0.215947	0.0963931	-0.15236	-0.101433	-0.276135	-0.0349641	-0.124962	0.0258381	-0.111784	-0.267728	-0.134427	-0.183546	-0.0638021	0.190455	0.0594712	-0.0227895	-0.0337029	0.00282296	0.128069	0.123434	-0.0648775	-0.0145091	-0.232565	-0.132075	0.0210339	0.0148741	-0.184776	0.110922	-0.20491	0.138108	-0.0944426	-0.194073
KEGG_GNRH_SIGNALING_PATHWAY	0.0401165	-0.238283	-0.325829	-0.296865	-0.224287	-0.0702946	-0.113437	-0.0818182	-0.13073	0.152733	-0.124611	0.0837332	0.111473	0.101278	0.174755	0.157421	-0.158137	0.216641	-0.0659727	-0.0199687	-0.0634698	0.0303213	-0.215852	-0.16027	0.128418	-0.163137	-0.297106	0.0754373	-0.0431679	0.0691216	0.0821233	0.149555	0.29459	-0.12709	0.0233164	0.0317676	0.0638744	0.0284054	-0.0143368	-0.232738	-0.0736036	0.154139	-0.107111	-0.2196	0.0300628	-0.0390186	-0.17077	-0.0368493	-0.212516
KEGG_PROGESTERONE_MEDIATED_OOCYTE_MATURATION	-0.0942837	0.228459	-0.104646	-0.237109	-0.200398	-0.239238	-0.332656	-0.338679	-0.159239	-0.0905631	0.171817	-0.0755272	-0.112663	0.00502487	0.228072	-0.0425138	-0.0829893	0.138186	-0.166616	0.0298589	-0.00646964	0.202268	-0.232744	0.193167	-0.209328	0.0731306	-0.145887	0.0677248	-0.193159	-0.0839061	-0.144411	-0.224617	-0.111569	-0.0193299	0.0900287	0.114302	0.320093	-0.0523789	0.0547665	-0.153785	-0.00175582	0.294221	0.352699	0.274382	-0.0136905	0.113934	-0.0238712	0.388043	-0.226832
KEGG_MELANOGENESIS	-0.131572	-0.317857	-0.347838	-0.376297	-0.158658	-0.0354476	-0.114025	-0.187935	-0.332102	-0.0421214	-0.396309	0.189631	-0.0761251	-0.178388	-0.0134934	0.0636018	0.0437288	0.316195	-0.279268	-0.0575446	-0.238752	-0.0339833	-0.344237	-0.302617	0.0807075	-0.295958	-0.462954	0.128945	-0.170089	-0.0219508	-0.0557427	0.0247111	0.190958	-0.35868	0.0110278	-0.122089	-0.143393	-0.0249826	-0.12086	-0.314092	-0.132237	-0.078018	-0.277876	-0.321653	-0.0641409	-0.0393352	-0.167916	0.168511	-0.338984
KEGG_ADIPOCYTOKINE_SIGNALING_PATHWAY	-0.338741	-0.177674	-0.191561	-0.0975498	-0.232621	-0.107025	0.0506364	0.0473849	-0.0362372	-0.0303971	0.00716597	0.194266	-0.157672	0.0638034	0.0295662	-0.0696855	-0.00838301	-0.112396	-0.0943144	-0.0121763	-0.0773038	0.0288903	0.059591	0.0571591	-0.00853092	-0.145497	-0.0135269	-0.1301	-0.0889063	0.0759154	-0.167737	-0.142379	0.017236	-0.194223	0.013382	-0.101662	-0.130948	-0.35155	-0.173172	-0.295456	-0.165326	-0.107453	-0.300997	-0.162476	-0.191155	-0.0433137	0.181371	-0.214309	-0.102729
KEGG_TYPE_II_DIABETES_MELLITUS	0.0359609	0.2534	-0.487837	0.0714122	0.279837	0.163606	-0.0732372	-0.0700022	-0.187099	0.0215353	0.0320192	0.45242	-0.0489637	0.13938	0.211809	0.422653	-0.170036	0.379149	0.188232	-0.44154	-0.1665	-0.343077	0.174705	0.0524132	0.0484986	-0.196034	-0.235486	-0.145516	0.267179	0.372321	-0.101182	0.361246	0.206791	0.0681877	-0.0862925	0.189632	0.640657	0.197268	0.307904	0.0165809	-0.11919	0.348123	0.362895	-0.157665	-0.104324	-0.246853	-0.0274402	-0.266691	-0.15759
KEGG_ALDOSTERONE_REGULATED_SODIUM_REABSORPTION	0.426252	0.126824	0.0707684	-0.224869	-0.209321	0.050927	0.0463582	-0.328521	0.37734	0.420792	-0.058183	-0.0796273	-0.263222	-0.202686	0.573415	0.266942	-0.0193184	0.440226	-0.226216	0.261085	0.354795	0.413898	0.329651	-0.161098	0.496706	0.523604	-0.288952	0.447727	-0.107328	0.155	0.29836	0.350756	-0.299601	0.324628	-0.0853889	-0.0164073	-0.0537263	0.207091	0.381034	-0.0105827	-0.0378255	0.0529581	0.0243846	-0.223981	-0.196913	-0.085144	0.363302	0.340049	-0.0119271
KEGG_VASOPRESSIN_REGULATED_WATER_REABSORPTION	0.104932	0.195725	-0.250008	-0.141435	-0.0987857	-0.227633	-0.0487074	-0.180578	-0.0617108	-0.0784887	-0.264087	-0.154092	-0.277863	-0.179428	-0.281366	-0.345435	-0.00886286	-0.423786	-0.161432	-0.306613	-0.336962	0.0838048	-0.116532	-0.301971	-0.104727	-0.411964	-0.473176	-0.279358	-0.372225	-0.201547	-0.336013	0.100119	-0.266335	-0.141175	-0.225626	-0.482697	-0.040808	-0.229093	-0.0081619	-0.41873	-0.177079	-0.055534	0.075103	-0.11502	-0.110795	-0.116429	-0.0428584	0.0154436	-0.177788
KEGG_PROXIMAL_TUBULE_BICARBONATE_RECLAMATION	0.21814	-0.0829733	-0.180671	-0.375673	-0.205428	-0.0683776	-0.141954	-0.421319	-0.131814	-0.0688214	-0.0174946	-0.616295	-0.443877	-0.257658	0.361738	0.11687	-0.381086	0.248198	-0.635344	-0.0126736	0.163119	0.448182	0.30718	-0.0166306	0.457695	0.406018	-0.433674	0.22179	-0.164272	0.0912634	0.214298	0.323902	-0.24258	0.346773	0.129622	-0.32104	-0.460931	-0.385263	-0.0259338	-0.0948656	-0.509551	-0.36227	-0.469631	-0.370582	-0.633098	-0.560193	0.13848	-0.119979	-0.16128
KEGG_ALZHEIMERS_DISEASE	0.105353	-0.0249386	-0.101482	-0.142095	-0.253229	-0.0878518	-0.0538713	-0.096773	-0.0699235	0.0894522	0.0107871	-0.108753	-0.00392148	-0.228302	-0.0078159	0.0965499	-0.0062436	0.175442	-0.139596	0.0677937	-0.167417	-0.177396	-0.187241	-0.11148	0.0244271	-0.0699496	-0.188112	-0.119741	-0.149645	0.0432055	-0.0819803	0.178866	0.0185172	-0.151492	-0.191537	0.0863819	-0.109512	-0.0511729	0.00154875	-0.150603	-0.0468777	0.0604906	-0.109642	-0.041862	-0.113919	0.127786	-0.0798986	-0.079435	-0.0669667
KEGG_PARKINSONS_DISEASE	0.0223162	0.246261	0.0818159	0.0262991	0.0442158	0.0451155	-0.0517027	-0.0337558	0.0605533	0.0802646	0.0330713	-0.0956941	0.117608	-0.0525064	0.147322	0.0045841	-0.0640869	0.0804575	-0.0544503	-0.0776269	-0.0480606	0.00638487	0.0882406	0.0722007	0.0305373	-0.0305337	-0.17906	-0.0702005	-0.243757	0.00525299	-0.140722	0.0828786	-0.0306939	-0.018625	-0.126805	0.0791892	-0.0961461	-0.00765886	-0.0941971	-0.132814	0.0595498	-0.0216464	0.0975472	-0.0224527	-0.145325	0.127485	-0.0487314	0.0404487	-0.0695346
KEGG_AMYOTROPHIC_LATERAL_SCLEROSIS_ALS	-0.281232	0.160761	-0.225181	0.0108442	-0.143315	0.237872	-0.0283115	0.0722212	-0.199906	0.0594486	-0.0767039	-0.22074	-0.0285237	0.189361	-0.315746	0.0764836	-0.260633	0.0328674	-0.200151	-0.00370576	0.0385494	0.0470816	-0.0687424	-0.004966	0.284442	0.13358	0.20906	-0.0277532	-0.072452	0.126397	0.288364	0.241191	0.0259053	0.181453	-0.0119104	-0.406455	-0.1781	-0.104961	0.21915	-0.168958	0.0877202	-0.192345	-0.125088	-0.290434	-0.174618	-0.456477	-0.399977	-0.25985	-0.410246
KEGG_HUNTINGTONS_DISEASE	0.117453	0.115671	0.0961125	0.0967817	-0.0380747	0.10948	0.0546366	0.060805	0.170673	0.199557	0.142964	-0.00213095	0.077731	0.0268952	0.0712588	0.100071	0.0103335	0.147035	-0.157187	-0.0388306	-0.000893981	0.0518866	0.0248303	0.115957	0.0343667	0.0649957	-0.103556	-0.164216	-0.0698793	0.0635418	-0.0657944	0.189419	0.0582981	-0.0501339	-0.131409	0.0753842	-0.0122096	-0.105154	-0.0625412	-0.220402	0.0681563	0.063459	-0.0687063	0.0222563	-0.0444538	0.144888	-0.0614307	0.028241	0.0148663
KEGG_PRION_DISEASES	0.229504	0.127829	0.0889938	-0.197709	-0.357885	-0.161953	-0.200715	-0.3184	-0.190831	-0.364997	-0.242805	0.287158	-0.535197	-0.312905	0.031209	-0.0734829	-0.0103511	0.0683219	-0.336351	-0.197165	-0.291992	-0.304593	-0.527287	-0.150658	-0.468479	-0.424406	-0.0299755	-0.46894	0.396056	-0.407522	0.136576	-0.148946	0.00882784	-0.359649	0.296458	0.0576539	0.0658148	-0.350384	0.0325184	-0.398265	-0.343676	0.331897	-0.180536	-0.132866	-0.0720719	-0.30593	-0.409861	-0.418974	-0.132177
KEGG_VIBRIO_CHOLERAE_INFECTION	0.215174	-0.178082	-0.180204	0.0884397	0.0218181	-0.333707	-0.241859	-0.00821395	-0.134879	-0.09671	-0.264372	0.309902	-0.0127758	-0.021143	-0.177625	-0.0285362	0.0439165	0.0444509	0.212543	0.0157	0.113987	0.286954	0.124822	-0.0410596	0.182286	0.0977205	-0.161813	0.125491	0.143001	-0.0192037	0.0396427	0.0970398	0.298625	-0.0133832	0.228538	-0.12725	0.301164	0.110462	0.210193	0.156445	-0.0386814	-0.0321021	0.0887497	-0.00515995	0.245728	0.302663	-0.138043	0.130332	-0.131583
KEGG_EPITHELIAL_CELL_SIGNALING_IN_HELICOBACTER_PYLORI_INFECTION	-0.119622	0.0959004	-0.0340653	0.0398807	0.0872225	-0.11364	-0.121034	0.0979315	-0.0886583	-0.0268947	-0.0552614	0.20673	0.186089	0.206113	0.023477	-0.0137439	0.0680703	-0.0230741	0.252657	0.129568	0.202421	0.345785	0.302088	0.322287	0.248519	0.305192	0.12564	0.164361	0.136029	0.095437	0.0942252	0.00228863	0.296936	0.128584	0.218442	0.0501001	0.202778	-0.126626	0.035116	0.152094	0.0222145	-0.107984	0.0734297	-0.00359772	0.12251	0.256911	-0.0835342	0.00995814	-0.118494
KEGG_PATHOGENIC_ESCHERICHIA_COLI_INFECTION	0.350046	0.145507	-0.328647	0.132647	-0.373301	-0.280575	-0.0594781	0.255754	-0.228013	-0.331161	-0.35819	0.22536	-0.0845653	-0.214142	-0.272548	-0.22817	-0.231851	-0.128374	-0.295374	0.0883106	-0.0892851	-0.183902	-0.235527	-0.341514	0.350647	-0.304933	-0.356834	-0.327318	0.0928639	-0.33695	-0.108183	0.121656	-0.255804	-0.116514	-0.170322	-0.26487	0.0930505	-0.274074	0.295415	0.14776	-0.25093	0.101649	-0.330033	-0.0915513	0.311102	-0.130413	-0.279114	0.0436943	-0.136444
KEGG_LEISHMANIA_INFECTION	0.144339	-0.180244	-0.195503	-0.0269286	0.258649	-0.065164	0.0153814	-0.059917	-0.317324	-0.0893532	0.14954	0.0176147	-0.148748	0.0448014	0.0443633	-0.050219	-0.0510433	0.049368	0.0822128	-0.0744933	0.0701491	-0.0362303	-0.150781	-0.0567826	-0.0264327	0.0946671	-0.18695	-0.253302	0.208696	0.112637	0.212765	-0.126312	-0.0805894	-0.135314	-0.0404625	0.149328	0.00894411	-0.320753	-0.0947878	-0.046565	0.0676392	0.123935	-0.197748	-0.15064	-0.173106	-0.0771923	-0.194681	0.188851	-0.139435
KEGG_PATHWAYS_IN_CANCER	-0.0840624	-0.0267165	-0.0794674	-0.0706208	0.0731402	-0.0596645	-0.0278533	0.0173234	-0.214109	-0.0625908	-0.142339	-0.0694502	-0.00273007	-0.0151053	0.0201218	-0.0238948	-0.0743565	-0.0611136	-0.071071	-0.0105879	-0.0330542	0.0559299	0.0338351	0.00142686	0.144793	-0.0392489	0.0050442	0.141364	0.0792163	0.0980425	-0.029525	-0.0180777	0.0556524	-0.0587212	0.00826799	0.141047	-0.0493015	-0.137665	0.0314544	0.0356281	0.0721084	0.0494399	0.0571952	-0.0828206	-0.100726	-0.161987	-0.0871295	0.0159399	-0.0186718
KEGG_COLORECTAL_CANCER	-0.32054	0.20329	-0.24442	-0.257812	0.124926	0.201578	0.259647	-0.191977	-0.223455	-0.0431438	0.00566016	0.187392	0.103444	0.459	0.217792	-0.0888796	0.0720105	0.0870169	0.123544	-0.188079	0.161611	0.183923	0.239034	0.119213	0.179992	0.126332	0.150297	0.154061	0.067931	0.111733	0.149058	0.348162	-0.092621	0.0768754	0.277467	0.287971	-0.0547538	-0.0675435	0.379132	0.176877	0.156967	0.161982	0.179755	-0.0449474	-0.274027	-0.0161305	-0.179243	0.356014	-0.148795
KEGG_RENAL_CELL_CARCINOMA	-0.254751	-0.198157	-0.350637	-0.0855498	0.101378	0.0229214	0.113033	0.122968	-0.179349	0.212073	0.13248	0.00359606	-0.143562	0.197264	-0.0470429	0.0683163	0.105813	-0.0353355	-0.108582	-0.0433225	-0.0899224	0.124373	0.316175	0.319903	-0.0771805	0.102471	0.185355	0.101317	-0.100813	-0.0701675	0.0771234	0.0993212	-0.0410044	0.29248	0.220139	-0.0461715	0.0875336	-0.0594484	0.252923	0.264819	0.106055	0.32757	0.153518	-0.00716685	0.0189839	-0.303578	-0.255328	-0.0234395	0.0268316
KEGG_PANCREATIC_CANCER	-0.052731	0.236858	-0.175601	-0.16439	0.234213	0.119858	0.331355	-0.00197441	0.0743604	0.0422913	0.182792	0.0879602	0.131086	0.2937	0.195644	-0.13906	0.0869008	-0.0571041	0.106515	-0.243128	0.0461498	0.242441	0.312427	0.179907	0.326308	0.232478	-0.0356663	0.313494	0.105335	0.210067	0.216013	0.105239	-0.11008	0.157484	0.265996	0.145541	0.026183	0.0133335	0.0978733	0.167399	0.0886938	0.205781	0.253267	0.0862106	-0.184498	0.175546	0.104096	-0.00659473	-0.0249205
KEGG_ENDOMETRIAL_CANCER	-0.13524	-0.162822	-0.151769	-0.105238	-0.184073	-0.0126158	0.327355	-0.0881044	-0.20509	0.0331249	0.186495	0.374837	0.0549818	0.352375	0.15968	0.221964	0.243009	0.0943535	-0.0445376	-0.0683816	0.0536719	0.193542	0.387434	0.144969	0.183081	-0.0667257	-0.148042	0.293236	-0.264115	0.238471	0.118051	0.19666	-0.0546221	0.261926	0.212448	0.322616	0.0498244	0.0338291	0.344335	-0.11383	0.259676	0.227032	0.128804	-0.0819161	-0.0598533	-0.113369	0.243646	0.256853	-0.0916279
KEGG_GLIOMA	0.0824333	-0.169745	-0.30649	-0.229795	-0.347883	0.139088	-0.123478	0.0387246	-0.179258	0.260034	0.00589852	-0.0757821	-0.198067	-0.0605921	0.148209	0.172383	0.12264	0.286683	-0.132305	-0.188617	-0.313273	-0.233886	-0.000628225	-0.195051	0.312952	-0.0875173	-0.352	0.180367	-0.155973	-0.0655876	0.17936	0.122794	0.228236	-0.0355023	-0.248368	0.121912	0.0893744	0.0527283	-0.08902	-0.0232893	-0.105667	0.110952	-0.227216	-0.278013	-0.157384	-0.167279	-0.107914	-0.118786	-0.27627
KEGG_PROSTATE_CANCER	0.0361365	0.138869	-0.0427232	0.116699	-0.0446828	0.324302	0.0664305	0.0993545	0.0818404	0.046096	0.0991593	0.174843	-0.1526	0.0918989	0.189108	0.00853558	-0.141382	0.0284732	0.0171554	-0.198561	-0.143196	0.0597833	-0.0667285	0.0865671	0.169262	0.0628515	-0.0031349	0.0676882	0.0295657	-0.120747	0.154577	0.134271	0.159845	-0.0514315	0.082851	0.259238	-0.071666	-0.0636098	0.073346	-0.0887975	0.0921125	0.211518	0.0667498	-0.0941218	0.0224425	-0.0570132	-0.0399813	0.0885221	-0.15118
KEGG_THYROID_CANCER	-0.0812125	-0.202718	-0.2491	-0.312057	-0.0557007	-0.153613	0.243704	-0.138336	-0.279244	-0.200087	-0.00516429	0.20351	0.0744033	0.187336	0.107524	-0.0805871	0.0938661	0.0819593	-0.0804137	-0.0428982	-0.208438	-0.0358685	0.194149	0.0399924	0.132383	0.0125735	-0.372867	0.1709	-0.162498	0.290177	-0.0201427	0.0235581	-0.133007	-0.134471	-0.151507	0.289866	0.0806498	-0.0123979	0.35397	-0.0803786	0.151466	-0.0378001	-0.134006	-0.0998051	-0.177913	-0.301053	0.0687962	0.367158	-0.218596
KEGG_MELANOMA	-0.368956	-0.0413758	-0.208094	-0.0683663	-0.222016	0.0885207	0.0118481	-0.115022	0.1537	0.105463	0.0952366	0.229661	-0.199717	0.10427	0.300316	0.102501	0.137017	0.121703	-0.136841	-0.123049	-0.152951	-0.168941	0.2007	-0.0913556	0.101241	-0.0455334	-0.210748	0.0172993	-0.0672246	0.165052	0.0332531	0.041477	-0.0145227	0.169945	0.0373958	0.338555	0.27434	0.0219307	0.290987	-0.0688861	-0.0751914	0.189821	0.017129	0.0550145	-0.0142543	-0.183174	0.0872087	0.194969	-0.221187
KEGG_BLADDER_CANCER	-0.0223549	-0.384828	-0.341187	-0.359731	-0.0795635	-0.0254678	0.100826	-0.0995657	-0.0953248	-0.291798	0.0138626	0.308484	0.0567158	0.257233	0.19357	0.0377611	-0.0444644	0.464331	0.0907781	-0.0239192	0.0936176	0.0649556	0.273239	0.0262808	0.103199	-0.113832	-0.280959	0.248784	0.0944278	0.242052	0.318494	0.176868	-0.0794331	-0.00070364	-0.126347	0.386594	0.393445	0.200341	0.330227	-0.0927247	0.172467	0.255035	0.0593524	0.0554116	0.0785246	-0.187496	-0.170884	0.345548	-0.217619
KEGG_CHRONIC_MYELOID_LEUKEMIA	-0.149332	-0.0422955	-0.0551657	-0.275944	-0.156467	0.00800884	0.087975	-0.220961	-0.174526	-0.0149788	0.0850951	0.0649717	-0.0134961	-0.038854	0.0369896	0.0539529	0.0162805	0.000319324	-0.0169676	-0.240103	0.0101098	0.268574	0.170233	0.257151	0.0284679	0.208345	0.0486308	0.158404	0.025669	0.00591079	0.068646	-0.0525812	-0.0377117	-0.0356987	0.166504	0.160889	0.0417568	-0.0491553	0.0564905	0.047628	0.179805	0.134735	-0.00746223	-0.142069	0.132491	-0.0321121	-0.0105837	0.178273	0.109621
KEGG_ACUTE_MYELOID_LEUKEMIA	-0.0873168	0.141265	-0.128951	-0.25716	0.0251795	0.138876	0.228379	-0.116988	0.0244872	0.0670256	0.0889158	0.249496	-0.128344	-0.0620792	0.121292	0.171492	0.114926	0.071588	0.04764	-0.125817	-0.148016	0.126742	0.106459	-0.0282108	0.0538935	0.286707	-0.0720909	0.00582942	0.168257	0.145386	-0.00626201	0.0323427	0.194823	-0.0690413	0.0400037	0.0817644	0.102762	-0.117395	-0.16756	-0.144839	-0.111833	-0.0615186	0.0576656	-0.0412406	-0.273206	-0.0926794	-0.0312844	0.144392	0.0565954
KEGG_SMALL_CELL_LUNG_CANCER	0.027929	0.201959	0.155919	0.0981468	-0.103997	-0.124564	-0.0927455	0.155427	-0.232098	0.102733	-0.172843	-0.148742	0.098861	-0.106631	0.0548622	0.107391	-0.046231	0.0456857	-0.0125582	0.14015	0.00116796	-0.156498	0.063879	0.0474217	0.142625	-0.198379	0.0319544	0.122048	0.0180603	0.0564436	0.0435256	-0.165626	0.0884031	-0.0286951	-0.0606609	-0.0123505	-0.0983952	-0.0345373	-0.0311051	0.00197057	0.130075	0.0731324	0.0728648	0.0681001	0.0348933	-0.0152947	0.0850081	-0.169559	-0.164617
KEGG_NON_SMALL_CELL_LUNG_CANCER	-0.0185429	0.0740344	-0.17755	-0.0666771	-0.0513518	-0.0280522	0.125769	-0.0619482	-0.0264398	0.190308	0.228484	0.0869984	-0.178033	0.0521445	0.191493	0.0966915	-0.000942957	0.0530332	-1.10474e-05	-0.164647	-0.0381856	0.246178	0.122851	0.0696848	0.0702649	0.11076	-0.0230263	0.270747	-0.191516	-0.0224724	0.0504698	-0.135919	0.071993	0.187432	0.0280649	0.168259	0.208367	-0.158401	-0.00584471	-0.105383	0.150696	0.108691	0.112503	-0.0453522	0.0226594	-0.0808455	-0.0103904	0.168127	-0.0389704
KEGG_SYSTEMIC_LUPUS_ERYTHEMATOSUS	0.412603	-0.0617267	-0.259245	-0.203792	-0.252344	-0.22761	-0.0847579	-0.325271	-0.403238	-0.355608	0.390286	-0.278893	-0.328932	-0.391459	-0.100452	0.149873	0.232427	0.0164522	0.117717	-0.255725	-0.211419	-0.260573	-0.451649	0.0494605	-0.0564074	0.0626165	-0.0700669	-0.453356	-0.0230151	-0.16138	0.0250947	0.0522545	0.196096	-0.201091	-0.0948076	0.0984892	-0.11014	-0.255687	-0.286463	-0.00566548	-0.334372	0.21727	-0.360239	0.205909	0.135691	-0.540646	0.0289567	-0.44918	-0.00591187
KEGG_HYPERTROPHIC_CARDIOMYOPATHY_HCM	0.125632	-0.274499	-0.110206	0.0572042	0.172545	-0.311382	-0.0377192	-0.0786261	-0.193225	0.176477	-0.452386	-0.0796662	-0.0631055	-0.0490878	-0.43869	-0.0265978	-0.00542703	-0.207115	-0.0560943	-0.247147	-0.363771	-0.258958	-0.152651	-0.149202	-0.249488	-0.583179	-0.241659	-0.113851	-0.267203	0.18567	-0.371204	-0.17766	-0.0673987	-0.324871	0.0757338	-0.0176864	-0.0129673	-0.0512181	0.167159	0.130914	-0.137915	0.158223	0.0577394	0.18687	0.129105	-0.244011	0.229427	-0.223496	-0.32827
KEGG_ARRHYTHMOGENIC_RIGHT_VENTRICULAR_CARDIOMYOPATHY_ARVC	0.233392	-0.239491	0.0139912	0.102525	-0.0546701	-0.328854	-0.153316	0.167667	-0.372194	0.0655497	-0.376125	0.00664588	-0.018244	-0.150305	0.0254901	-0.115698	0.08316	0.0754214	0.0292152	0.0216901	-0.187905	-0.277426	-0.0394552	-0.129969	0.0931089	-0.506511	-0.0142586	-0.0152209	-0.262295	0.112051	-0.2433	0.0381078	-0.0108565	-0.138476	0.0986607	-0.0695967	-0.193121	-0.294841	0.108793	0.0502685	-0.183559	0.080779	0.0562882	0.0556968	0.0712167	-0.347784	0.124343	-0.276622	-0.276458
KEGG_DILATED_CARDIOMYOPATHY	0.162379	-0.24531	-0.178708	0.0813339	0.189198	-0.30371	-0.105754	-0.0452682	-0.0649704	0.19639	-0.513948	-0.036946	-0.037086	-0.1869	-0.425443	-0.0532962	-0.0090111	-0.275175	-0.0424511	-0.250545	-0.254069	-0.125926	-0.211585	-0.202413	-0.316756	-0.592762	-0.238724	-0.206266	-0.250608	0.123268	-0.387338	-0.146631	0.00618215	-0.422105	0.121717	-0.0198059	-0.0230912	-0.0409646	0.203869	0.0267488	-0.22869	0.229489	0.112937	0.227216	0.120917	-0.193329	0.128429	-0.164123	-0.349853
KEGG_VIRAL_MYOCARDITIS	-0.264125	-0.143667	0.122739	0.19433	0.292093	-0.211599	-0.376952	-0.0323303	-0.127997	0.0151056	-0.527306	-0.0202706	-0.264853	-0.11962	-0.428716	0.00248057	-0.253189	-0.124256	-0.0878526	-0.48827	-0.292497	0.0369239	0.0173412	-0.215227	-0.277846	-0.159844	0.198787	-0.31842	0.360289	0.306362	-0.358046	-0.0557908	-0.193859	-0.285712	0.171741	-0.218975	-0.454606	0.175159	0.45623	0.0758709	-0.301796	0.303567	-0.108776	0.228791	-0.46437	0.122821	0.0867304	0.0490128	-0.343285
[truncated: 1,069 more columns]

## Sheet: Pathway (Reactome)
Pathway scores from GSVA(Reactome) based on global proteomic data
	Exp079160	Exp081604	Exp081605	Exp081614	Exp082976	Exp087306	Exp087307	Exp087308	Exp087318	Exp087444	Exp087461	Exp087333	Exp087367	Exp087368	Exp087369	Exp087370	Exp087371	Exp087372	Exp087373	Exp087374	Exp087375	Exp087376	Exp087377	Exp087378	Exp087379	Exp087380	Exp087381	Exp087382	Exp087383	Exp087384	Exp087385	Exp087386	Exp087387	Exp087388	Exp087389	Exp087390	Exp087391	Exp087392	Exp087393	Exp087397	Exp087398	Exp087399	Exp087400	Exp087401	Exp087402	Exp087403	Exp087404	Exp087405	Exp087406
REACTOME_HEMOSTASIS	0.073449	-0.0558287	-0.124498	-0.0619122	-0.150295	0.00987903	-0.0545477	-0.00928959	-0.116855	-0.00337215	-0.0234218	0.0283111	-0.114267	-0.116955	-0.171836	-0.0527385	-0.0226938	-0.0226181	-0.0743539	0.0508318	-0.144158	-0.125572	-0.101968	-0.0869287	-0.0904504	-0.160443	-0.0724223	-0.153111	0.0708164	-0.0871889	0.095508	-0.0415938	-0.139725	-0.25468	-0.0359304	-0.208391	0.00622938	-0.150212	0.0881177	0.0328651	-0.145621	0.0339525	0.0362729	0.126882	0.142233	-0.0196522	-0.070091	-0.059221	-0.11085
REACTOME_INTRINSIC_PATHWAY_FOR_APOPTOSIS	0.162488	0.29623	0.144628	0.0563077	0.0712294	-0.139564	-0.192607	-0.0176694	-0.217512	-0.142554	-0.109909	0.0654316	-0.0666094	-0.108642	-0.0437709	0.0568736	-0.0747859	0.161406	-0.247411	-0.289024	-0.176996	-0.180535	-0.264007	-0.402343	0.0958546	0.0362752	-0.364884	-0.171748	-0.106373	0.0981954	0.122713	0.181454	-0.156974	-0.289966	-0.408968	-0.15907	-0.0722728	-0.140399	0.151901	-0.177354	-0.0773341	0.160039	-0.12571	-0.137582	-0.205968	-0.270937	-0.159079	-0.0508645	-0.367512
REACTOME_TRANSLESION_SYNTHESIS_BY_Y_FAMILY_DNA_POLYMERASES_BYPASSES_LESIONS_ON_DNA_TEMPLATE	-0.292596	0.265401	-0.226953	0.0138079	0.165502	0.154728	0.28318	0.139607	0.0743804	-0.0905065	-0.279159	-0.141713	0.509195	0.0447525	0.208897	-0.394734	0.255433	-0.110874	0.207503	0.0714254	-0.395859	0.399644	0.367321	0.375056	0.117027	-0.124044	0.319046	0.452653	0.0360748	0.349046	-0.172821	0.0174283	-0.174787	0.393971	-0.242962	0.221252	0.0434491	0.338792	0.163832	0.286033	0.37669	-0.04221	0.305025	0.155888	-0.329944	-0.0263146	0.0751812	-0.211159	-0.354208
REACTOME_RECOGNITION_OF_DNA_DAMAGE_BY_PCNA_CONTAINING_REPLICATION_COMPLEX	-0.43438	0.264279	-0.27151	0.198868	0.304941	0.25187	0.378752	0.227719	0.256712	-0.157874	-0.231147	-0.328524	0.355093	0.0119565	0.264555	-0.513412	0.279743	-0.312515	0.174557	0.160792	-0.495444	0.37136	0.347811	0.156543	0.0468896	-0.165721	0.0368918	0.30362	-0.0708475	0.394511	-0.298372	-0.133022	-0.285326	0.280422	-0.460111	0.084826	-0.0789509	0.201856	0.262496	0.271016	0.385413	-0.0799472	0.312987	0.123704	-0.402759	-0.312798	0.197071	-0.310961	-0.479982
REACTOME_TRANSLESION_SYNTHESIS_BY_POLH	-0.329372	0.300094	-0.130174	0.264203	0.28995	0.319111	0.295252	0.30906	0.328745	-0.174612	-0.20032	-0.445016	0.42532	-0.105461	0.14737	-0.472615	0.134158	-0.384083	-0.0972443	-0.0484928	-0.500174	0.376734	0.245215	0.256817	-0.209503	-0.372466	0.149812	0.407136	-0.19206	0.226461	-0.434281	-0.127125	-0.327545	0.163653	-0.548982	-0.135855	-0.105941	0.331757	0.19327	0.181253	0.377134	-0.20226	0.244025	0.0943839	-0.534535	-0.400538	-0.00148792	-0.381963	-0.401237
REACTOME_RECOGNITION_AND_ASSOCIATION_OF_DNA_GLYCOSYLASE_WITH_SITE_CONTAINING_AN_AFFECTED_PURINE	0.265936	-0.420442	-0.28895	-0.340201	0.240164	-0.463192	0.219896	-0.557246	-0.451076	-0.224977	0.639743	-0.667179	0.0598235	-0.259495	-0.435278	0.132891	-0.0925664	-0.139487	0.437809	-0.547016	-0.208836	0.42087	-0.431718	-0.350942	0.291075	0.361211	-0.290636	-0.31375	-0.526427	0.228992	-0.0247851	-0.0183265	0.601779	-0.251374	-0.231138	0.359027	0.0913662	0.034783	-0.439524	0.279543	-0.119169	-0.16223	-0.450876	0.523776	0.340619	-0.715606	0.213688	-0.430808	-0.0432744
REACTOME_RESOLUTION_OF_AP_SITES_VIA_THE_MULTIPLE_NUCLEOTIDE_PATCH_REPLACEMENT_PATHWAY	0.143094	0.133842	0.0275579	0.135673	0.132129	-0.0714717	0.225145	-0.108652	0.232054	0.219451	-0.101092	-0.338578	0.0510232	0.0808036	0.204414	-0.186708	-0.078825	-0.133359	-0.262311	-0.0656942	-0.416379	0.157268	-0.204693	-0.0944122	0.183634	0.205688	-0.146205	0.10251	-0.44862	-0.243678	-0.257258	-0.198789	-0.103913	0.155503	-0.185467	-0.279241	-0.163931	0.0813985	0.145347	-0.223772	-0.097997	-0.295602	0.0942954	0.0727662	0.055349	0.0588935	0.0132479	-0.283359	-0.20697
REACTOME_ACTIVATION_OF_BAD_AND_TRANSLOCATION_TO_MITOCHONDRIA_	0.603507	0.054649	0.372426	0.233628	-0.234822	-0.38614	-0.34492	0.196748	-0.268382	-0.293428	-0.568126	0.160336	-0.116024	-0.126181	-0.19014	-0.00359899	0.189409	0.109565	-0.187094	-0.318782	-0.156745	-0.323942	-0.312849	-0.560971	-0.195447	-0.484246	-0.584802	-0.297675	-0.193986	-0.172943	0.330704	0.210535	-0.118996	-0.493029	-0.502255	-0.106097	-0.30792	-0.174044	0.188649	0.176642	-0.291245	0.489312	-0.395021	-0.371889	0.237013	-0.312804	0.0098531	-0.319507	-0.349677
REACTOME_APOPTOTIC_CLEAVAGE_OF_CELLULAR_PROTEINS	-0.281293	-0.304374	-0.0356531	-0.331418	0.0299627	-0.180543	-0.132802	0.253823	-0.328981	-0.287553	-0.308845	0.170211	0.0554783	-0.221813	-0.148952	-0.327893	-0.022914	0.0235234	-0.285875	-0.0865968	0.0641321	-0.20464	-0.0737924	-0.0492823	-0.146418	-0.0569018	-0.132037	-0.232176	-0.142222	0.0735373	-0.118974	-0.254289	-0.281664	-0.159893	0.0219913	-0.247144	-0.0223475	-0.28653	0.1062	-0.147001	-0.145893	-0.317974	-0.0112658	-0.350782	0.0318088	-0.0881919	-0.0136857	0.0659426	-0.257597
REACTOME_APOPTOTIC_FACTOR_MEDIATED_RESPONSE	-0.339484	0.442085	-0.156233	-0.298288	-0.0956868	0.353337	0.109967	-0.255158	-0.276194	0.0704802	0.307916	0.185552	-0.330892	-0.0913208	0.282341	0.328167	-0.392368	0.36155	-0.190787	-0.11954	0.0886729	-0.23727	-0.378966	-0.115664	0.161149	0.475993	-0.179896	-0.35824	0.00138446	-0.0397716	0.191867	0.326453	-0.200166	-0.392285	-0.470095	0.113848	-0.15437	-0.157268	0.420879	-0.389413	0.0916106	-0.0571224	0.0476567	-0.135161	-0.497035	-0.32988	-0.536863	0.132295	-0.454769
REACTOME_OPIOID_SIGNALLING	-0.2667	-0.0599295	-0.194197	-0.0904626	-0.0312574	-0.245756	-0.100436	-0.200793	-0.0428287	0.00169773	-0.219886	0.0991308	0.0526647	-0.193105	0.0920208	-0.0677044	-0.0544316	0.0365338	-0.00921581	0.145642	-0.117834	0.0988933	-0.0661061	-0.209143	0.0463113	-0.162643	-0.202506	0.310907	-0.331594	-0.0995954	-0.0472718	-0.201916	0.143338	-0.176292	0.159891	-0.0429473	-0.0481286	-0.0725777	-0.119862	-0.0884309	-0.0924485	-0.13441	0.0437174	0.131471	0.0423493	-0.0771411	0.181192	0.0697108	-0.141114
REACTOME_CA_DEPENDENT_EVENTS	-0.0372034	-0.0259431	0.0427945	0.167152	-0.084892	-0.0549661	0.0683196	-0.244998	0.254927	0.174191	-0.223577	0.134351	-0.220634	-0.253551	-0.176621	-0.252734	-0.364358	-0.262429	-0.0521019	-0.212839	-0.310965	-0.134823	-0.271838	-0.37221	-0.0784289	-0.42037	-0.516013	0.00252687	-0.382908	-0.203193	-0.0495387	-0.271496	0.00505712	-0.316546	-0.261445	0.0210299	-0.0920152	-0.0520919	0.0297741	-0.281434	-0.254162	-0.28123	-0.315281	-0.16979	-0.100121	-0.365927	-0.0871846	-0.122983	-0.393498
REACTOME_G_PROTEIN_MEDIATED_EVENTS	-0.304408	-0.139272	-0.174592	-0.143551	-0.0981162	-0.178565	-0.110232	-0.229098	-0.0888882	-0.098414	-0.299176	0.103533	-0.186308	-0.437521	-0.123313	-0.258156	-0.216657	-0.117458	-0.325808	0.0601784	-0.272816	-0.0877633	-0.335531	-0.422286	-0.108898	-0.37782	-0.476577	0.202694	-0.345615	-0.208628	-0.328939	-0.36141	0.0189109	-0.341614	-0.146874	-0.206869	-0.236763	-0.171453	-0.275477	-0.225637	-0.266006	-0.293029	-0.0688863	-0.12576	-0.151375	-0.222836	0.0246094	-0.12709	-0.387035
REACTOME_NEUROTRANSMITTER_RELEASE_CYCLE	0.402464	0.305506	0.242729	-0.312877	-0.13386	0.0857106	-0.230612	0.0144481	-0.0681507	0.229804	0.244189	-0.171133	-0.280462	-0.266363	-0.138331	-0.34287	-0.432528	-0.258663	-0.0819868	-0.339146	-0.0594654	-0.115828	0.154054	-0.134639	0.0408336	-0.152203	-0.406909	-0.0501194	-0.257518	-0.471722	-0.267041	0.0790136	-0.438767	0.165397	-0.0733717	-0.323062	-0.190437	-0.492679	-0.227725	-0.0544815	-0.162716	-0.119975	-0.231843	-0.428444	-0.457164	0.061257	-0.254136	-0.129453	-0.326619
REACTOME_NEUROTRANSMITTER_RECEPTORS_AND_POSTSYNAPTIC_SIGNAL_TRANSMISSION	0.128381	0.141883	-0.209656	-0.0587476	-0.198321	-0.106574	-0.0267148	-0.0447175	-0.129959	-0.117197	0.0169065	0.144893	-0.0734393	-0.0861549	-0.0121788	-0.15197	-0.196921	0.0537725	-0.110018	0.197055	0.0273127	0.0136082	0.0980571	-0.161165	0.186623	-0.209305	-0.134611	0.110296	-0.0523716	-0.198972	-0.135429	0.00359608	-0.214637	0.0162641	-0.0361965	-0.239555	0.0619009	-0.265212	0.0179332	0.0161328	-0.0787181	0.117551	0.107968	-0.00990874	0.0834702	-0.0736604	-0.0971207	0.347774	-0.123047
REACTOME_TRANSMISSION_ACROSS_CHEMICAL_SYNAPSES	0.144143	0.12487	-0.172456	-0.117608	-0.196632	-0.0383106	-0.0271562	-0.00821429	-0.0771724	-0.0616571	0.0247815	0.134665	-0.0285607	-0.131722	0.0397186	-0.125633	-0.190814	0.0716543	-0.149039	0.151396	-0.00210914	0.0473928	0.0963131	-0.147284	0.146749	-0.109665	-0.106978	0.130007	-0.0540686	-0.188398	-0.112814	0.0322794	-0.223267	0.0490371	-0.01462	-0.228009	0.0283671	-0.265515	0.0279286	0.0431796	-0.0557256	0.0992161	0.102405	-0.0760797	0.0278731	-0.0769249	-0.114608	0.270077	-0.133792
REACTOME_NEURONAL_SYSTEM	0.0798959	0.0861783	-0.16108	-0.129492	-0.131113	-0.0717312	-0.0298615	0.0353093	-0.0959251	-0.0456377	-0.0206388	0.124308	-0.0495523	-0.121161	0.032373	-0.0778876	-0.161917	0.0855713	-0.132137	0.0916999	-0.00239849	0.0396568	0.117983	-0.149601	0.115683	-0.089756	-0.10818	0.109468	-0.0935219	-0.148241	-0.102683	-0.0103001	-0.151279	0.00598462	-0.0162732	-0.218322	0.0109245	-0.201917	-0.0194931	-0.0130513	-0.0118876	0.0204026	0.0944017	-0.00609528	0.0264974	-0.0400828	-0.0822356	0.24836	-0.153484
REACTOME_FORMATION_OF_RNA_POL_II_ELONGATION_COMPLEX_	0.0110311	0.387409	0.384115	0.242186	0.229239	0.398108	0.314483	0.269161	0.287718	0.315982	0.257938	-0.206012	-0.188161	-0.167805	0.0224474	-0.0392951	0.125475	0.190573	-0.00568957	-0.113304	0.121275	0.0480254	-0.071232	0.0999813	-0.0144341	0.211419	0.0458944	-0.323866	0.0840545	-0.0245458	-0.177497	0.00509216	0.0167873	-0.0263956	-0.1371	-0.211752	-0.28476	-0.174619	-0.121691	0.0107611	-0.0153767	-0.124167	-0.253205	0.00509687	-0.258575	-0.263572	-0.388439	-0.245982	-0.207803
REACTOME_IRS_MEDIATED_SIGNALLING	-0.249563	-0.198164	0.188365	0.28624	-0.0846813	0.104322	-0.0264463	-0.0872149	0.205204	0.36414	-0.0585021	0.482249	0.332879	0.66439	0.425029	0.555627	0.469579	0.342434	0.508928	0.380593	0.219913	0.250755	0.459559	0.289996	0.516431	0.259926	0.587599	0.357895	0.319028	0.510706	0.356352	0.4757	0.537424	0.547907	0.484527	0.452019	0.478704	0.295529	0.395153	0.454758	0.31633	0.526971	0.435636	0.513999	0.549224	0.372431	0.42016	0.481993	0.503667
REACTOME_FORMATION_OF_THE_EARLY_ELONGATION_COMPLEX	0.151531	0.390055	0.36024	0.132303	-0.0777809	0.425964	0.128794	0.201102	0.191096	0.241457	0.250661	0.00190151	0.0271402	-0.350542	0.19076	0.210901	0.304665	0.238998	0.110905	-0.355699	0.196173	0.291099	-0.113334	0.42066	0.280718	0.302076	0.0160385	-0.304539	0.110137	-0.147668	0.0789006	0.060095	-0.053124	-0.234975	-0.107143	-0.0953602	-0.430498	-0.266426	-0.0583074	0.0707137	0.159117	-0.316858	-0.263494	-0.0334299	-0.00801228	-0.209205	-0.354936	-0.375905	-0.0916077
REACTOME_ACTIVATION_OF_BH3_ONLY_PROTEINS	0.454527	0.261963	0.329051	0.261427	0.0273328	-0.383361	-0.358939	0.145091	-0.321312	-0.18287	-0.417229	0.0439468	-0.144569	-0.265731	-0.219999	-0.0984519	0.0408237	-0.049551	-0.21988	-0.406086	-0.334309	-0.24288	-0.361303	-0.477609	-0.169025	-0.375344	-0.412398	-0.15159	-0.353243	0.0598698	0.0213742	0.155406	-0.00144073	-0.316512	-0.422941	-0.303615	-0.151784	-0.13064	0.0477011	-0.0962368	-0.188564	0.31126	-0.330611	-0.272921	-0.0512521	-0.321582	-0.0707123	-0.252989	-0.350864
REACTOME_EFFECTS_OF_PIP2_HYDROLYSIS	0.324341	0.260028	0.504156	0.386924	0.427048	0.329239	0.249719	0.233533	0.404557	0.136322	0.257193	0.237696	0.101127	0.110863	-0.0928463	0.299272	0.0175038	-0.0206726	0.136929	0.211036	-0.0622146	0.243556	0.164771	0.184361	0.105487	0.148539	-0.191971	0.0197869	0.0960807	0.202845	0.152017	0.104104	0.0422374	0.0123098	0.201484	-0.123589	-0.189117	-0.434034	0.0612633	-0.0559383	-0.13952	-0.342331	0.177474	-0.0291096	-0.0582192	-0.00752576	-0.254289	-0.244446	0.149734
REACTOME_GPVI_MEDIATED_ACTIVATION_CASCADE	-0.284813	0.115633	0.151519	0.0644123	-0.163558	-0.2887	0.20122	0.261143	-0.0362436	0.104744	-0.0908164	-0.00873578	0.155477	0.20893	-0.118934	-0.251244	0.0449433	-0.113272	0.123244	-0.145274	0.181751	0.147913	0.163825	0.445921	0.274843	0.165728	0.312983	0.383098	-0.0886929	0.00997322	-0.128761	0.146656	0.254064	0.0442543	0.201921	0.149417	0.0341818	-0.19576	-0.094779	0.106439	-0.173089	0.0432842	0.0358438	-0.223673	-0.0885566	-0.0557151	-0.440121	-0.0122796	0.0378306
REACTOME_DOWNSTREAM_SIGNALING_EVENTS_OF_B_CELL_RECEPTOR_BCR_	-0.193052	-0.0532602	-0.242211	-0.0290802	0.0219612	-0.000161986	0.0588387	0.0739625	-0.0417261	-0.106351	-0.140492	0.0782413	-0.13679	-0.100061	0.270597	-0.0775239	0.219317	-0.0964729	0.0451413	0.0792735	-0.161549	0.221619	0.0457617	0.0317898	0.163918	-0.248318	-0.0303124	0.361564	0.113112	-0.252985	0.098345	0.169014	-0.0846183	0.0456366	-0.0711958	-0.191381	0.0453901	0.0331201	-0.124304	-0.0487123	0.290171	0.117541	-0.0370161	0.0281931	-0.123733	-0.214195	0.000166447	-0.100358	-0.181015
REACTOME_ANTIVIRAL_MECHANISM_BY_IFN_STIMULATED_GENES	-0.0695272	0.0205638	-0.109122	-0.0337559	0.227372	-0.0695017	-0.00397514	0.122306	-0.123566	-0.0749573	-0.0582758	-0.158745	0.262253	-0.102838	0.014262	-0.200922	-0.0167051	-0.0825351	0.172509	-0.0630198	-0.00220431	0.163142	0.360548	-0.0516803	0.0883224	0.0431087	-0.0450005	0.124013	0.0544391	0.0713682	-0.0523707	0.111353	-0.117816	0.00825742	0.114602	0.109094	0.183344	0.110942	0.0788522	0.113743	0.145127	0.0356223	0.286288	0.185466	-0.035885	-0.108625	0.0411904	-0.0936563	-0.110483
REACTOME_MEIOTIC_SYNAPSIS	0.332034	-0.361075	-0.226303	-0.0883305	0.238512	-0.449633	0.250206	-0.328538	-0.351698	-0.18703	0.416863	-0.493807	0.0180549	-0.280661	-0.333424	0.107838	0.0936704	-0.0255303	0.0879324	-0.363657	-0.175402	0.40919	-0.247304	-0.202134	0.34028	0.234191	-0.155734	-0.147118	-0.355372	0.34099	-0.0405794	-0.078148	0.418582	-0.233471	-0.143298	0.262552	-0.126221	-0.00736898	-0.241223	0.168255	-0.120359	0.0328845	-0.337623	0.42303	0.254447	-0.62214	0.0884322	-0.388186	-0.167071
REACTOME_ROS_AND_RNS_PRODUCTION_IN_PHAGOCYTES	-0.0399797	-0.05692	0.00917145	0.320068	0.318507	-0.211108	-0.478702	-0.0558733	-0.275716	-0.211398	-0.0801636	-0.15472	-0.122011	-0.00682777	-0.292774	-0.382608	-0.016691	0.0850996	0.352707	-0.0826705	-0.00160151	0.174501	0.171627	-0.116985	0.29838	-0.0156552	0.0467678	0.0380426	-0.0051636	0.1243	0.350839	-0.204962	-0.0145783	-0.0259625	-0.0929457	-0.0812761	0.30334	0.166624	0.139217	0.16432	0.0477108	-0.0800488	-0.163252	-0.086352	-0.0284891	0.108508	-0.311577	-0.0527553	-0.352489
REACTOME_SIGNALING_BY_FGFR_IN_DISEASE	0.248199	0.320845	0.367622	0.348219	0.262221	0.300216	0.279833	0.332725	0.403504	0.211567	0.23185	0.180296	0.305715	0.140952	0.239284	0.340625	0.277893	0.0534189	0.256586	0.0947925	0.357168	0.179219	0.0858245	0.170401	0.389596	0.38842	0.249328	-0.00534432	0.246516	0.186969	0.224434	0.351618	0.155365	-0.0294641	0.141514	0.296019	0.0946755	0.0522111	-0.016157	0.104722	0.133067	-0.0672988	0.217666	0.352517	0.227364	0.024676	-0.0235652	-0.0812327	0.235492
REACTOME_SIGNALING_BY_ERBB2	-0.192793	0.508544	-0.141318	0.222221	0.388442	0.343281	0.35577	0.480739	0.251773	-0.143154	0.112352	-0.140502	0.345098	0.250031	0.226672	-0.145295	0.327153	-0.141955	0.227606	0.144458	0.00921422	0.55229	0.334369	0.334877	0.0876922	-0.225589	0.140099	0.302809	0.184814	0.111429	-0.206436	0.144113	-0.293344	0.433527	0.0794234	0.268198	0.136001	0.194525	0.429526	0.220398	0.465014	0.241603	0.398048	0.341604	-0.301401	-0.222381	0.150013	0.000955224	-0.125477
REACTOME_SIGNALING_BY_ERBB2_IN_CANCER	0.310372	0.618257	0.140549	0.543247	0.382211	0.387709	0.232095	0.531304	0.266731	0.255879	0.481723	0.0770146	0.135036	0.488612	0.26865	0.225711	0.252256	0.208533	0.35938	0.204337	0.543202	0.52514	0.213633	0.392188	0.0850198	0.399561	0.378195	0.135142	0.195115	0.0501904	0.417595	0.384688	0.457633	0.607049	0.494939	0.479742	0.0811133	0.152524	0.459958	0.151152	0.589774	0.300971	0.472918	0.336906	-0.12526	0.456793	-0.137361	0.299842	0.481781
REACTOME_CELLULAR_RESPONSE_TO_HYPOXIA	-0.330413	-0.0212645	-0.263902	0.0158949	0.116005	-0.0235296	0.052701	0.00118065	-0.0262683	-0.113205	-0.10884	0.0222612	-0.220027	-0.176585	0.317409	-0.172972	0.111834	-0.140911	0.00148767	0.0996485	-0.124234	0.312736	0.087623	0.102305	0.0171721	-0.172929	-0.00358643	0.316233	0.117251	-0.25856	-0.0313301	0.162135	-0.192851	0.119913	-0.11147	-0.2052	0.174821	0.0645532	-0.105126	0.102714	0.245597	0.105771	0.03945	0.0648972	-0.160321	-0.184699	0.0334949	-0.0213291	-0.128767
REACTOME_CONSTITUTIVE_SIGNALING_BY_LIGAND_RESPONSIVE_EGFR_CANCER_VARIANTS	-0.276571	0.551765	-0.336531	0.450094	0.548188	0.540189	0.361111	0.57874	0.115238	-0.322817	-0.04776	-0.146856	0.503733	0.129195	0.311123	-0.215443	0.219784	-0.24822	0.51194	0.138878	-0.0889412	0.639433	0.50849	0.645816	0.230021	-0.325422	0.465897	0.583147	0.419064	0.547231	-0.0187715	0.445321	-0.192035	0.613117	-0.127944	0.430722	0.461421	0.477352	0.552066	0.556314	0.774866	0.492056	0.645501	0.571504	-0.491028	-0.280321	-0.0130261	0.130263	-0.103668
REACTOME_SIGNALING_BY_ERBB4	-0.24801	0.0739665	-0.148881	0.091738	0.019681	0.244923	0.129992	0.204224	0.272574	-0.121905	0.0256888	0.00730833	0.269553	0.180596	0.152676	-0.290796	0.422096	-0.360189	0.126672	-0.0340186	-0.243907	0.464204	0.267637	0.297704	0.0886964	-0.142545	0.0687112	0.138849	0.173875	0.178622	-0.130462	0.268588	-0.272192	0.347444	-9.39849e-06	0.171504	0.265556	0.38248	0.22753	0.291706	0.319889	0.0952503	0.468483	0.305057	-0.240014	-0.323682	0.285237	-0.0668952	-0.133301
REACTOME_ANTIGEN_PROCESSING_CROSS_PRESENTATION	-0.240176	-0.105111	-0.309061	0.00409856	-0.084285	-0.126305	-0.145941	-0.0721337	0.0317569	-0.152424	-0.291901	-0.0927814	-0.240962	-0.250283	0.154042	-0.302988	0.0543208	-0.136584	-0.0413328	0.00688437	-0.162723	0.0360043	-0.093573	-0.0477163	-0.00473393	-0.260033	-0.167664	0.157352	-0.0484839	-0.300329	-0.0966358	0.0272944	-0.260785	-0.144891	-0.149532	-0.286835	-0.0675601	-0.0846815	-0.0976527	-0.0250604	-0.00510472	0.0243923	-0.156989	-0.0475706	-0.247114	-0.241981	-0.138891	-0.159007	-0.184158
REACTOME_CROSS_PRESENTATION_OF_SOLUBLE_EXOGENOUS_ANTIGENS_ENDOSOMES_	-0.267125	-0.11738	-0.294808	-0.0775358	-0.0674689	-0.159053	-0.0870247	-0.200382	0.00289741	-0.0080802	-0.0226571	0.113299	-0.267096	-0.163397	0.394214	-0.0948211	0.0768367	0.0172444	-0.0582037	0.0220747	-0.047907	0.101505	-0.141523	-0.0615952	0.0230225	-0.0523887	-0.03419	0.181347	0.0119394	-0.379897	0.154317	0.176909	-0.148	-0.0277142	0.0453894	-0.263987	0.0133966	-0.0866264	-0.234159	-0.116879	0.106124	0.0690584	-0.188691	-0.0530127	-0.12707	-0.0809048	0.00852738	-0.0513017	-0.0355013
REACTOME_SHC1_EVENTS_IN_ERBB2_SIGNALING	0.0226408	0.145167	-0.106862	0.055306	0.0782291	-0.0413426	-0.250248	0.33056	0.283435	0.160628	0.0207382	0.193829	0.20624	0.322869	0.169521	0.416312	0.425331	0.182268	0.429053	0.376001	0.378942	0.554087	0.250951	0.136416	0.253995	0.413508	0.242009	0.219397	0.101408	0.0555293	0.10432	0.218084	0.193272	0.5189	0.306818	0.197558	-0.0810362	0.166667	0.361613	0.0443094	0.425857	0.105675	0.291572	0.155251	-0.0916663	0.186644	0.0405251	0.262367	0.365935
REACTOME_NUCLEAR_SIGNALING_BY_ERBB4	-0.0268322	-0.130357	0.207886	-0.127907	-0.491139	-0.00882515	-0.16739	-0.0250499	0.308903	0.12069	0.351618	0.0676582	0.0490483	0.339749	-0.0200207	-0.350705	0.328847	-0.225036	-0.316043	-0.283102	-0.245377	0.130299	-0.229012	-0.0342802	-0.116106	0.228204	-0.122803	-0.516006	-0.00447946	-0.505953	-0.177215	0.143391	-0.364325	0.207259	0.190484	-0.0318898	-0.0326525	0.111028	-0.276711	0.00622712	-0.209246	-0.169397	0.204043	0.150559	0.207283	-0.394973	0.381285	-0.0664013	-0.0591694
REACTOME_MITOCHONDRIAL_PROTEIN_IMPORT	-0.121877	-0.233505	-0.133464	0.032614	-0.15665	-0.104398	-0.0585371	0.0691274	-0.180291	-0.20382	0.0103944	-0.186915	-0.00153575	-0.301452	0.181956	-0.091074	0.11633	0.0991344	-0.261111	0.0464798	0.180337	-0.212294	0.0456369	-0.153038	-0.150527	0.0462133	-0.0856755	-0.0550235	0.0824553	-0.251661	-0.322949	-0.0583428	-0.261495	0.250592	0.0146319	-0.314595	-0.0161151	-0.146159	-0.195455	0.00245637	0.00274817	-0.127981	0.0500292	-0.256172	-0.176509	-0.174898	-0.197965	0.0362997	-0.165387
REACTOME_CYTOKINE_SIGNALING_IN_IMMUNE_SYSTEM	0.0359106	-0.0332541	-0.116096	-0.0995346	0.0404871	0.0053802	-0.0743134	0.0251229	-0.0995716	-0.0684651	-0.0437304	-0.0479034	0.0705942	0.00883411	0.0531042	-0.00877394	0.0401233	-0.0513133	0.0758822	0.0298678	-0.0664452	0.0839559	0.0847188	-0.0146758	0.0908068	-0.00878418	0.0094196	0.0901868	0.0278379	-0.00479872	0.0762838	0.0237166	-0.0235731	0.0664843	0.150332	0.0562805	0.0383732	0.0126941	0.0921856	0.0743229	0.0968134	0.113047	0.0723884	0.0686073	0.0107056	-0.0951636	0.037641	0.0626036	-0.0406196
REACTOME_ADAPTIVE_IMMUNE_SYSTEM	-0.0917625	0.0314016	-0.150767	0.0789709	-0.0847523	-0.0418588	-0.00861773	0.130972	-0.0214203	-0.0925111	-0.190672	0.053405	-0.0224304	-0.112111	0.0351332	-0.0574124	-0.0252552	-0.0636894	-0.0879535	0.0833019	-0.0743844	0.00515687	0.041371	-0.0313432	-0.00162354	-0.14542	-0.0623287	-0.00949484	-0.0246337	-0.12097	-0.0979569	0.0653784	-0.0411268	-0.00975477	-0.113399	-0.163338	-0.0616702	-0.134731	0.0684498	-0.0721409	-0.00708738	0.039715	-0.120597	0.0180916	-0.010866	-0.0863579	-0.110163	-0.0704193	-0.0803642
REACTOME_SPRY_REGULATION_OF_FGF_SIGNALING	-0.423162	0.327077	-0.468573	-0.247491	0.470908	0.352586	0.327226	0.122464	0.0140364	-0.388556	-0.206619	0.0468261	0.482616	0.173143	0.585185	-0.107411	0.253486	0.0114432	0.408741	-0.154898	-0.14491	0.510408	0.581174	0.519033	0.193449	-0.112539	0.0913475	0.575434	-0.123146	0.498326	-0.195781	0.338144	-0.0832747	0.263729	-0.115174	0.40386	0.576909	0.569869	0.426901	0.505553	0.579049	0.504015	0.612884	0.519613	-0.103577	-0.371935	0.163222	0.378516	-0.0878998
REACTOME_BMAL1_CLOCK_NPAS2_ACTIVATES_CIRCADIAN_GENE_EXPRESSION	-0.0184706	0.169763	0.174839	0.232836	-0.265774	0.158038	0.219664	0.0266112	0.257547	0.145026	-0.0983482	-0.0605038	-0.284357	-0.373961	-0.106664	-0.228575	-0.188442	-0.451875	-0.332251	-0.336284	-0.376006	-0.130708	-0.273464	-0.0215377	0.100424	0.0435524	0.126332	0.0372112	-0.0808819	-0.274272	-0.0228311	-0.31094	-0.389729	0.2863	-0.449169	-0.233145	-0.0235	-0.377952	-0.24987	-0.0490461	0.121766	-0.215803	-0.0935078	-0.0631776	0.11016	-0.171594	-0.0183161	-0.429729	-0.18057
REACTOME_INTRINSIC_PATHWAY_OF_FIBRIN_CLOT_FORMATION	-0.360606	-0.231035	0.0705374	0.218824	-0.386076	0.173758	0.20111	0.00863559	0.193133	0.0687	0.0418303	0.298548	-0.238111	-0.0374532	-0.275423	0.078877	0.1864	-0.145232	-0.152958	0.128665	-0.218632	-0.587546	-0.358287	0.111795	-0.571053	-0.418989	0.328978	-0.710414	0.456734	-0.377908	0.187427	-0.200642	-0.245277	-0.627791	0.0999237	-0.166916	0.182525	-0.480482	0.0238963	-0.344831	-0.692922	-0.308337	0.0292318	0.0489262	0.271271	0.119042	0.0157282	-0.249946	-0.366861
REACTOME_COMMON_PATHWAY_OF_FIBRIN_CLOT_FORMATION	-0.108125	-0.178341	-0.218753	-0.277501	-0.0487516	-0.1407	0.134958	-0.568648	-0.219292	0.405112	0.0316279	-0.109701	-0.306199	-0.333231	-0.536121	0.0850056	0.0272296	0.122935	0.241697	0.357472	-0.191209	-0.631039	-0.0375676	0.15622	-0.589212	-0.367694	0.32491	-0.666402	0.298337	-0.222045	0.21844	-0.145874	-0.217519	-0.539215	0.302442	-0.154042	0.233378	-0.462461	0.257746	0.264596	-0.464381	0.240552	0.131344	0.396175	0.597456	0.121421	0.334509	0.0893223	-0.181515
REACTOME_FORMATION_OF_FIBRIN_CLOT_CLOTTING_CASCADE_	-0.206424	-0.155615	0.133534	-0.0543251	-0.222632	0.0488868	0.188241	-0.312591	0.014356	0.114006	-0.0123091	0.0449228	-0.144526	-0.107094	-0.326148	0.0124709	-0.0125424	-0.073998	-0.00121179	0.109534	-0.239926	-0.575487	-0.164515	0.0407403	-0.537722	-0.365436	0.318962	-0.62774	0.258836	-0.283409	0.273197	-0.15069	-0.211101	-0.577264	0.017923	-0.109365	0.293561	-0.438005	0.187394	-0.0126887	-0.485038	0.039738	0.0732206	0.20381	0.372704	0.200159	0.123922	-0.0596063	-0.155024
REACTOME_THE_CITRIC_ACID_TCA_CYCLE_AND_RESPIRATORY_ELECTRON_TRANSPORT	0.138145	0.0329397	-0.0341153	-0.0459197	-0.113471	-0.0531758	-0.0822237	0.0700316	-0.0308151	0.0277259	0.0784333	-0.0640164	0.0227908	-0.0531795	0.106185	0.178553	-0.0877432	0.0854555	0.0665818	-0.0890928	-0.0509203	-0.0247549	-0.0929363	-0.0328195	-0.0925471	-0.0401129	-0.0857242	-0.173348	-0.0934715	-0.0299135	-0.108475	0.107961	-0.0506734	0.0060311	-0.0224747	0.0500561	0.0014254	0.0835536	-0.183054	-0.097265	-0.0207399	0.17193	0.0108613	-0.107414	-0.0572117	0.115973	-0.0115309	0.0631785	0.0439914
REACTOME_SIGNALING_BY_SCF_KIT	-0.339085	-0.0524684	-0.297107	-0.335596	0.130123	-0.0796402	0.0560065	0.0599378	0.0945768	-0.0177715	-0.11833	0.0602923	0.402383	0.345884	0.246141	0.360354	0.359538	0.0389834	0.285672	0.133815	0.205775	0.331526	0.335939	0.384566	0.392454	0.460423	0.225588	0.428295	0.205644	0.324247	-0.048057	0.101006	0.326055	0.355686	0.337297	0.0743673	0.272068	0.0419669	-0.0540923	0.124264	0.314021	0.017059	0.238342	0.15811	0.281079	-0.00457016	0.151736	0.306136	0.31007
REACTOME_COLLAGEN_DEGRADATION	-0.217832	-0.0447079	-0.10107	-0.106629	-0.207086	-0.0359354	0.132278	0.0685129	0.159683	0.0701145	-0.421861	0.0153424	0.093923	0.0587496	0.301228	0.142429	0.238508	0.0855614	0.0886965	-0.0817895	-0.0211223	-0.191677	-0.0622501	-0.0209953	-0.0389557	0.0843588	-0.0822983	-0.0764299	-0.22259	0.0781911	0.242716	-0.231179	0.266737	-0.163297	0.00705514	0.0407106	0.192359	0.0965816	-0.253987	-0.174459	-0.230782	-0.195152	-0.268772	0.0393446	-0.103261	-0.002215	0.139797	-0.22752	0.0831864
REACTOME_TRANSLOCATION_OF_SLC2A4_GLUT4_TO_THE_PLASMA_MEMBRANE	0.453251	0.171416	-0.0212019	0.127482	-0.179305	-0.123195	0.0171705	0.303713	-0.160015	-0.156672	-0.137202	0.169111	-0.306928	-0.242627	-0.205343	-0.221938	-0.158011	0.155437	-0.287261	0.00851125	0.120551	-0.190511	0.0311542	-0.335287	0.127563	-0.269735	-0.353666	-0.18783	0.23334	-0.161404	-0.0438568	0.0540108	-0.284114	-0.164668	-0.250583	-0.286708	-0.234402	-0.333696	0.157224	0.168301	-0.272746	0.108846	-0.197613	-0.143136	0.146384	-0.239173	-0.192999	-0.0837299	-0.259036
REACTOME_REPRODUCTION	0.282752	-0.323315	-0.268033	-0.120283	0.0632372	-0.372672	0.0372534	-0.231386	-0.181893	-0.0329425	0.36606	-0.445004	-0.0349404	-0.198809	-0.183529	0.232464	0.0029605	-0.0179121	0.0124908	-0.28519	-0.138144	0.20996	-0.168961	-0.12567	0.24981	0.301796	-0.0459577	-0.138762	-0.273946	0.201238	0.00978617	-0.00170477	0.443987	-0.140876	-0.114051	0.180733	-0.0725012	0.0535919	-0.230165	-0.0158124	-0.169071	-0.108451	-0.292242	0.256629	0.119559	-0.559154	0.0624967	-0.406655	-0.133162
REACTOME_DEGRADATION_OF_THE_EXTRACELLULAR_MATRIX	-0.302711	-0.188672	0.0196026	-0.110853	-0.256421	0.0413609	-0.0911063	0.0465079	-0.11406	-0.0584213	-0.14612	-0.0954819	0.167159	0.0589	0.150855	0.103572	-0.0840614	0.00730293	-0.0567773	0.0284923	0.0523763	-0.267909	0.00825004	-0.0652583	-0.169811	-0.0462691	0.0280283	-0.218884	-0.0462562	0.0451819	0.154755	-0.213911	0.00475403	-0.306336	-0.180927	0.0686219	-0.00823688	-0.202006	-0.111707	-0.25122	-0.118622	-0.100996	-0.189994	0.0063537	-0.21265	-0.00818036	0.136936	-0.0596277	0.0860868
REACTOME_EXTRACELLULAR_MATRIX_ORGANIZATION	-0.153487	-0.10499	0.0288884	-0.0927285	-0.181207	-0.0699952	-0.153525	-0.0850451	-0.158305	-0.0503294	-0.175854	-0.10289	0.0566495	-0.00307337	0.0204289	0.088983	-0.151902	-0.0774289	-0.020263	0.0151826	-0.0605593	-0.247849	-0.0154179	-0.138074	-0.176161	-0.154651	0.0284626	-0.262629	-0.0193022	-0.00600103	0.153144	-0.0959495	-0.057536	-0.274438	-0.149751	0.0311821	-0.02902	-0.256514	-0.00797063	-0.171623	-0.136079	-0.0631973	-0.115452	-0.0116414	-0.0726922	-0.057751	0.0342553	-0.160158	-0.000333822
REACTOME_COLLAGEN_FORMATION	-0.11121	-0.0281155	-0.135407	-0.00964665	-0.203506	-0.17815	-0.0288554	0.00842218	-0.118265	0.188262	-0.251417	-0.0726943	-0.0435556	0.0542419	0.206717	0.122693	-0.048592	-0.0181232	-0.044581	0.0783529	-0.120519	-0.145667	0.0377435	-0.26723	-0.236413	-0.021326	0.0173958	-0.243404	-0.20319	-0.0238247	0.255973	-0.247872	0.0185277	-0.204377	-0.0837767	0.0180715	-0.0124658	-0.0287592	-0.166333	-0.271124	-0.25283	-0.127482	-0.173314	0.00989476	-0.0410201	-0.0709731	0.0257334	-0.243899	0.0997003
REACTOME_SYNTHESIS_OF_PA	-0.119251	-0.113943	-0.367053	-0.33954	-0.107853	-0.250896	-0.257206	-0.115928	-0.0651057	-0.0524434	-0.129798	-0.399539	-0.166889	-0.182944	-0.301343	-0.269589	-0.393424	-0.254002	-0.340165	-0.0873174	-0.16299	-0.101715	-0.172995	-0.209204	-0.106445	-0.154578	-0.149293	0.0965864	-0.374845	-0.275772	-0.305954	-0.446434	-0.187765	-0.0370937	-0.243378	-0.349587	-0.1546	-0.282938	-0.29974	-0.357139	-0.0168088	-0.0878601	-0.263657	-0.35205	-0.152096	-0.108991	-0.190314	0.0298106	-0.296848
REACTOME_SYNTHESIS_OF_PC	0.109207	0.0110838	0.0222296	-0.148182	-0.111142	0.181809	0.102702	0.244546	0.0136979	0.317274	0.342869	0.0517612	0.0441889	-0.220758	-0.0527055	0.20181	0.0729929	0.306852	-0.373481	0.170686	0.148286	0.245542	-0.119632	0.0040786	0.221498	-0.101244	0.0638563	-0.0316228	0.311995	-0.280879	0.0396744	0.213949	-0.263812	0.0074282	0.216944	0.117002	-0.111379	-0.33344	-0.0245521	-0.290798	-0.00304968	-0.251169	0.00253642	-0.235962	-0.0439796	-0.242081	-0.206631	-0.146677	-0.252616
REACTOME_GLYCEROPHOSPHOLIPID_BIOSYNTHESIS	-0.0816873	-0.138675	-0.146974	-0.242088	-0.149147	-0.0194026	-0.121269	0.0992153	-0.0107609	0.138412	-0.0120571	-0.088268	-0.0316426	-0.148836	-0.225135	0.0571041	-0.167738	-0.104378	-0.265579	-0.110108	-0.115311	0.0485972	-0.11817	-0.181992	-0.0792509	-0.125015	-0.113611	-0.0200373	-0.263123	-0.124301	-0.222904	-0.129384	-0.145184	-0.0589596	0.0344907	-0.11918	-0.0227734	-0.174361	-0.249151	-0.202363	0.0568051	-0.137602	-0.15728	-0.0828736	-0.0765658	0.0543068	-0.150862	0.139342	-0.130069
REACTOME_INOSITOL_PHOSPHATE_METABOLISM	0.262925	0.22628	0.188564	0.220984	0.0450242	0.493813	0.285241	0.51946	-0.00398252	0.318116	0.0636269	0.369091	0.218734	0.170844	0.155377	0.169671	0.371977	0.268603	0.0680496	0.256607	0.176186	0.316123	-0.0436698	0.205663	0.361474	0.0176212	-0.0842288	0.422748	0.119517	0.201123	0.144088	0.235438	0.493167	0.38985	0.262133	0.281971	0.344665	0.326334	0.0897389	0.28454	0.18062	0.326063	-0.0844868	0.111361	0.310342	0.403469	-0.0990815	0.163836	0.224708
REACTOME_PI_METABOLISM	0.171146	0.157232	-0.0326739	0.0932704	0.0387437	0.0727907	0.129799	0.268646	0.213396	0.159791	0.0965792	0.234748	-0.202736	0.0690628	-0.19468	-0.172948	0.00213835	-0.171997	-0.00129694	0.0396322	-0.0288203	0.163515	-0.0853099	0.113377	-0.128133	0.0349987	-0.00305167	-0.10868	-0.0887845	0.115429	-0.141342	-0.0876338	0.136923	0.0725047	0.241293	-0.106052	0.0921082	0.0682751	-0.139558	0.0773623	0.144813	0.2142	0.129225	0.0698103	-0.00662029	-0.0552146	-0.0323432	-0.10047	0.0426755
REACTOME_PHOSPHOLIPID_METABOLISM	0.0070655	-0.0479901	-0.0983134	-0.120992	-0.0794683	-0.00545827	-0.0525008	0.15116	0.0582736	0.14799	0.034033	0.0705603	-0.10715	-0.0298716	-0.175914	-0.0557411	-0.0766266	-0.108209	-0.162992	-0.00636165	-0.0621107	0.12321	-0.0754124	-0.0312128	-0.0830587	-0.0398251	-0.0563786	-0.0325825	-0.156892	0.00746614	-0.158348	-0.110576	0.0093361	0.022011	0.162635	-0.121643	0.0420514	-0.0718055	-0.189035	-0.0419494	0.116977	0.0399384	0.00856034	0.00963346	-0.0362328	-0.00973425	-0.0706633	0.0291653	-0.0122908
REACTOME_DAG_AND_IP3_SIGNALING	0.106071	0.186188	0.239084	0.26935	0.0738825	-0.0516035	0.132783	-0.0711998	0.204021	0.234276	-0.111551	-0.109022	-0.193962	-0.31207	-0.290918	-0.286934	-0.354429	-0.39903	-0.0803138	-0.138849	-0.281765	-0.0972293	-0.297781	-0.419722	-0.0314095	-0.453144	-0.464007	-0.00689378	-0.386433	-0.173584	-0.146479	-0.309435	0.103503	-0.244475	-0.239705	-0.159699	-0.218284	-0.159449	-0.18412	-0.251112	-0.246006	-0.379692	-0.221193	-0.214855	-0.190514	-0.31094	-0.0911007	-0.222853	-0.324046
REACTOME_MEIOSIS	0.306039	-0.276645	-0.241498	-0.0706644	0.0981188	-0.354011	0.115604	-0.174777	-0.164949	-0.0220454	0.40558	-0.431723	-0.0119624	-0.201878	-0.202325	0.237621	0.0904889	0.0132866	0.0380319	-0.242185	-0.118905	0.286904	-0.151567	-0.0726255	0.255083	0.347158	-0.0103232	-0.114063	-0.264557	0.249297	0.0372171	0.0313471	0.460379	-0.114955	-0.0578542	0.223451	-0.0629844	0.0727883	-0.187669	0.0219448	-0.134259	-0.0675184	-0.26884	0.310842	0.146611	-0.577914	0.0947548	-0.407182	-0.118388
REACTOME_CELL_CELL_COMMUNICATION	0.1905	-0.0880866	-0.0966723	0.0221669	-0.0826424	-0.211189	-0.0807941	0.0658282	-0.183805	0.0768591	-0.0412642	-0.0097681	-0.14385	-0.102243	-0.123969	0.0264957	-0.0834686	0.0581804	0.0792856	0.0948007	-0.236305	-0.149476	0.0214921	-0.242873	-0.0464188	-0.342041	-0.140043	-0.095251	-0.223657	-0.0541331	-0.215236	-0.115104	-0.0546366	-0.121626	-0.0931346	-0.178754	-0.250595	-0.138436	0.0929799	0.00190447	0.00292602	0.0305935	-0.112255	-0.155366	-0.00867465	-0.0640827	-0.0276812	0.044133	-0.0975978
REACTOME_PHASE_II_CONJUGATION_OF_COMPOUNDS	0.347118	0.166443	0.0102307	-0.0964023	0.18274	0.00843338	0.0319918	-0.000389044	0.143703	0.216123	0.0197477	-0.0211739	-0.0614573	0.20949	0.27284	0.128566	0.178881	-0.117987	0.243566	0.244645	-0.0216981	0.301514	-0.126033	-0.0383464	0.0838122	0.128709	0.139053	0.266579	0.0668954	0.0197247	0.0432599	-0.0808726	-0.010505	0.304141	0.0622746	-0.0147535	0.0349683	0.0674671	-0.0571201	-0.133315	0.0103692	-0.0329879	-0.0466822	-0.0100943	0.273882	0.0369151	0.125225	0.0453957	-0.138248
REACTOME_METHYLATION	0.408551	0.228	0.0340219	-0.0385547	-0.00385098	-0.0694578	0.200481	-0.129035	-0.0803482	0.227602	0.403336	-0.197653	-0.168701	0.0156743	0.481261	0.365836	0.273017	0.0508792	0.398341	0.173587	-0.0362863	0.480669	-0.343998	0.349852	0.393521	0.416765	-0.021183	0.431175	0.340151	0.450945	0.503753	0.0217257	-0.0650072	0.462683	-0.383926	0.351918	-0.218007	-0.0490131	0.194594	0.286217	0.345887	0.183456	-0.197926	-0.378272	0.346287	-0.0657161	0.0588156	0.0112688	0.0553818
REACTOME_CYTOSOLIC_SULFONATION_OF_SMALL_MOLECULES	-0.247588	-0.388731	-0.175867	-0.253062	0.296303	0.199974	0.260469	-0.259463	-0.224117	-0.0886289	-0.0298592	0.42879	0.310968	0.298848	0.233051	0.0504101	0.23834	-0.241019	0.430756	0.471119	0.373653	0.347313	0.420467	0.286151	0.229683	0.363731	0.483671	0.485845	0.00985922	0.164992	0.2737	-0.0622912	0.389144	0.294534	0.361584	0.443281	0.0529299	-0.0386227	0.51386	-0.152974	0.159829	0.409322	0.362384	0.547403	0.210381	0.0662863	0.28929	0.227396	0.0816743
REACTOME_GLUTATHIONE_CONJUGATION	0.274599	0.281147	-0.108389	-0.204407	-0.13137	-0.322299	-0.300677	-0.0313385	0.238378	0.153998	-0.27317	-0.18041	-0.331533	0.213403	0.133791	-0.065713	0.0688359	-0.220109	0.0290215	0.284713	-0.331703	0.241304	-0.44953	-0.256882	-0.216577	-0.0030287	-0.105243	0.0161633	-0.0349077	-0.150774	-0.333785	-0.303732	-0.312951	0.22735	-0.0732463	-0.39324	-0.046168	0.055231	-0.333325	-0.299729	-0.202965	-0.238864	-0.261091	-0.275856	0.276999	-0.12649	-0.0413572	-0.132252	-0.337005
REACTOME_ELASTIC_FIBRE_FORMATION	-0.0920087	0.131245	0.0681197	-0.137682	-0.174874	0.0206827	0.106648	0.48725	-0.0319593	-0.261505	-0.291657	0.217441	-0.164573	-0.0871976	0.0197967	0.179013	0.0428984	-0.0121963	-0.350428	-0.0079823	-0.100496	-0.331918	-0.368538	-0.0877114	-0.483853	-0.341544	-0.0613047	-0.288472	0.101058	-0.386275	-0.103383	-0.23623	-0.224829	-0.265264	-0.0991516	-0.290095	0.21243	-0.431665	0.28388	-0.38916	-0.370197	-0.26486	-0.429067	-0.0107804	0.147405	-0.0144379	0.164211	-0.160224	-0.131348
REACTOME_EUKARYOTIC_TRANSLATION_ELONGATION	-0.120174	-0.0132425	-0.040195	-0.0216663	0.162784	0.175351	-0.0203306	0.0887115	0.00298842	-0.0550374	0.0538516	0.163333	0.214653	0.104576	0.0262339	0.0140881	-0.0147488	-0.0617665	0.160846	-0.0997451	0.00782878	0.185947	0.183488	-0.0742622	0.151487	0.206573	0.193096	0.12543	0.0353413	0.195168	-0.0308211	0.192208	-0.201333	0.0285624	0.163828	0.0950714	0.0702027	0.258324	0.102369	0.0877555	0.0802492	-0.118451	0.0719528	0.095132	0.0543023	-0.102207	-0.0262734	0.0226505	-0.000250227
REACTOME_SIGNALING_BY_NOTCH	-0.0770094	-0.278781	-0.296108	-0.219699	0.0345657	-0.23298	0.0100243	-0.203906	-0.262089	-0.165438	0.107227	-0.165267	-0.17021	-0.224486	-0.00117918	-0.0558663	0.116644	-0.164672	-0.0682205	-0.150762	-0.217783	0.149074	-0.073099	-0.123545	0.0991466	-0.108277	-0.116128	0.119284	-0.182103	-0.0705921	-0.0767367	0.0309226	0.143667	-0.117787	-0.11419	0.00987763	0.0152886	-0.0303215	-0.219157	0.0874605	0.0640865	-0.0366946	-0.136348	0.0764857	-0.0682911	-0.367233	0.0627369	-0.263113	-0.166851
REACTOME_TELOMERE_MAINTENANCE	0.190237	-0.0452405	-0.0808611	-0.065192	0.223345	-0.173358	0.267937	-0.214329	-0.0667162	0.0656984	0.401575	-0.480495	0.128632	-0.139676	-0.239279	0.059908	0.00131091	-0.0863385	0.185701	-0.301325	-0.0564639	0.292184	-0.205369	-0.0476745	0.184196	0.30738	-0.0901313	-0.23983	-0.379669	0.119607	-0.00551571	0.0461011	0.414214	-0.165087	-0.313931	0.220025	-0.17843	0.00951014	-0.252209	0.158518	0.06161	-0.27303	-0.238308	0.226318	0.207956	-0.421599	0.111008	-0.424083	-0.0415964
REACTOME_GAP_JUNCTION_TRAFFICKING_AND_REGULATION	0.535841	0.428048	-0.344964	0.338134	-0.333569	-0.101864	0.0889242	0.384292	-0.0445167	-0.149047	-0.270449	0.269047	-0.133103	-0.321686	-0.288195	-0.241007	-0.242168	0.0935875	-0.473841	0.272144	0.234669	-0.207324	-0.00751845	-0.390252	0.368139	-0.0863367	-0.170513	-0.209903	0.412189	-0.207916	-0.341268	0.0975825	-0.453698	-0.018857	0.00210646	-0.38844	0.146172	-0.35989	0.2267	0.106847	-0.207359	0.166328	-0.0465057	0.0251388	0.412891	0.011116	-0.367062	0.228658	-0.282265
REACTOME_METABOLISM_OF_NUCLEOTIDES	-0.172172	-0.0977932	-0.0346723	0.269409	0.00620794	-0.0156848	-0.0315441	-0.0606053	0.163003	0.0817812	0.128489	0.00624411	0.120563	0.0475465	0.142706	0.0607996	0.227567	0.0917622	-0.0545585	0.120937	0.318377	0.373136	0.0532724	0.123169	0.40003	0.427889	0.175805	0.293151	0.292205	0.202899	0.270145	0.259556	0.161712	0.246874	0.0667261	0.0549676	0.0464004	0.0289967	0.157555	-0.0475035	0.278517	0.129918	0.079881	0.0505335	0.157435	0.128967	-0.0934024	-0.067539	0.139837
REACTOME_MITOCHONDRIAL_BIOGENESIS	0.0877052	0.144926	-0.066968	0.0906685	-0.0316855	-0.013467	-0.178219	-0.105895	-0.134348	-0.0331424	0.144187	-0.12334	0.0277706	-0.104467	0.0858872	0.259865	-0.261255	-0.217137	-0.158194	-0.110007	-0.121831	-0.10905	-0.211991	0.113606	0.133096	-0.0560372	-0.1905	-0.0386633	0.0794655	0.0495525	-0.0425322	-0.0184789	-0.0170768	0.0734178	-0.220687	-0.0822723	0.0331365	-0.203074	-0.176791	-0.128181	0.0314175	-0.00284516	-0.133891	-0.157991	-0.0356779	-0.278849	-0.151278	-0.117199	-0.246226
REACTOME_TRANSPORT_OF_THE_SLBP_DEPENDANT_MATURE_MRNA	-0.052036	-0.155727	0.15737	-0.0156297	0.275295	-0.0177897	-0.0320096	0.196516	0.041717	-0.0131166	-0.063046	-0.0204217	0.101324	0.0959066	0.118594	-0.0462816	0.213426	-0.0325339	0.321259	0.0461693	0.316125	0.082211	0.207031	0.0571543	0.224595	0.192892	0.111391	0.164637	-0.0590904	0.10443	-0.174599	0.19115	0.0682791	0.0452842	0.273343	0.0387707	0.239723	0.217769	0.0269919	-0.0476973	0.156984	-0.121054	0.0725469	0.130988	0.119682	-0.046117	0.173636	-0.028101	-0.0342004
REACTOME_TRANSPORT_OF_MATURE_MRNAS_DERIVED_FROM_INTRONLESS_TRANSCRIPTS	-0.0740412	-0.0875281	0.190886	0.0451022	0.300823	0.0254967	-0.0148354	0.211247	0.0841675	0.0488903	-0.0210256	0.0701702	0.140029	0.198517	0.159962	0.0165022	0.228202	-0.0227099	0.367958	0.0533608	0.275693	0.125501	0.22313	0.131681	0.242484	0.216148	0.0793178	0.20385	-0.0170446	0.0954128	-0.0240553	0.191703	0.0557118	0.0963419	0.293426	0.107655	0.253539	0.233163	0.0825478	0.000590029	0.211162	-0.0577108	0.171439	0.15928	0.169857	-0.00567862	0.169203	0.0630971	0.0571796
REACTOME_ACTIVATION_OF_MATRIX_METALLOPROTEINASES	-0.400397	0.00403908	0.239938	-0.220835	-0.343651	0.267918	-0.0186751	-0.135298	0.0873398	-0.112638	0.0908042	-0.189033	0.324641	0.238593	0.233262	-0.064068	-0.304344	-0.0268823	0.445411	-0.232503	0.30397	-0.144364	0.235084	0.12726	-0.321505	-0.212502	0.0653004	-0.358642	-0.0267013	0.152421	-0.0248786	-0.176044	0.0229133	-0.309268	-0.0865543	0.283816	0.309689	-0.0586617	-0.0361945	-0.0233659	-0.225619	-0.0145938	0.00850905	0.32348	0.0286034	0.163904	0.240591	0.184655	0.0794932
REACTOME_ZBP1_DAI_MEDIATED_INDUCTION_OF_TYPE_I_IFNS	0.211021	0.285346	0.00192079	0.223283	0.269059	0.322865	0.483258	0.273337	0.493993	-0.162729	0.0478985	0.110973	-0.387249	-0.212387	-0.205709	-0.24244	-0.214486	-0.359088	-0.0208565	0.107947	0.0555758	0.267495	-0.259436	-0.112324	0.220175	-0.183776	-0.295359	-0.131706	-0.249755	-0.257216	-0.141453	-0.101982	0.217511	0.015473	-0.16701	0.0324002	-0.311303	-0.338811	0.154813	-0.178417	0.112516	-0.124048	0.0299322	-0.458504	-0.238368	-0.0527392	-0.110008	-0.429483	-0.370702
REACTOME_SULFUR_AMINO_ACID_METABOLISM	-0.299012	-0.349987	0.101557	-0.0140024	0.305585	0.178654	-0.233671	-0.142309	0.31279	-0.153241	-0.371056	-0.439088	-0.119035	0.124182	0.19308	0.27954	0.126007	0.0161722	0.281517	-0.243001	-0.228187	-0.0304286	0.0308701	-0.0713793	0.321185	0.0638662	-0.317308	-0.0127885	-0.440273	0.418523	0.364823	-0.145058	-0.181219	0.281821	-0.124164	-0.0792052	0.280952	-0.388632	-0.0625071	0.0694922	-0.21592	-0.218206	-0.00863179	0.00314717	0.0574202	-0.322703	0.302023	0.171706	-0.17817
REACTOME_HIV_LIFE_CYCLE	-0.126849	0.0454646	0.0918761	0.0527587	0.175449	0.212947	0.170232	0.187148	0.107974	-0.070842	-0.102442	-0.17539	-0.0479845	-0.0802265	0.0926346	-0.151139	0.196239	-0.0149206	0.120018	0.161631	0.114045	0.187029	0.0950433	0.101806	-0.0021052	-0.00407538	0.0570064	0.0666586	0.0110187	0.0108893	-0.23849	0.0496332	-0.0579494	-0.0239315	-0.0496824	-0.0389594	-0.080464	0.162998	-0.0233776	0.00932626	0.128892	-0.0270332	0.0376043	-0.0237341	-0.143381	-0.161553	-0.0524647	-0.0658281	-0.173735
REACTOME_BUDDING_AND_MATURATION_OF_HIV_VIRION	-0.439242	-0.00236031	-0.372137	-0.0307544	0.343382	0.167955	0.371529	0.219859	0.27569	-0.309136	-0.381775	-0.298068	-0.0758438	-0.410986	0.0446195	-0.424697	0.0191671	-0.220174	0.0230141	0.012487	-0.390759	0.129507	0.11023	0.0765896	-0.36135	-0.416467	0.0444254	0.164736	-0.0307086	0.222465	-0.516034	-0.092953	-0.526967	-0.239013	-0.452234	0.0580729	-0.359359	0.250835	0.0380853	0.034002	0.240069	0.0358215	0.244436	-0.0135221	-0.367216	-0.375752	0.0494231	-0.23468	-0.492346
REACTOME_HIV_INFECTION	-0.114082	0.0208225	-0.00485932	-0.0436771	0.160779	0.053501	0.0474248	0.11985	0.0311536	-0.0305901	0.0371988	-0.0597694	-0.105563	-0.0835703	0.206746	-0.177212	0.109861	-0.0171019	0.0100731	0.128811	-0.00687094	0.0479512	0.104466	0.0451552	0.057507	0.0109504	0.00519124	0.115105	-0.0187497	-0.174615	-0.20099	-0.000805735	-0.112662	-0.0447698	-0.0331578	-0.118031	-0.087193	0.0469642	-0.0986448	-0.0425606	0.0924406	0.0179989	-0.00813253	-0.0243186	-0.124328	-0.183021	-0.0382174	-0.0583254	-0.125283
REACTOME_HOST_INTERACTIONS_OF_HIV_FACTORS	-0.137643	-0.0474208	-0.10295	-0.0859814	0.143635	-0.0470966	-0.0281715	0.0951022	-0.017893	-0.0832689	0.0261111	0.0210733	-0.0232449	-0.0427539	0.258907	-0.17532	0.147725	-0.0788986	0.0142218	0.166119	-0.0612503	0.0794023	0.200765	0.0776451	0.142118	-0.018812	-0.0339383	0.211891	0.0167825	-0.151417	-0.152085	0.0316338	-0.0850075	0.00376877	0.0527826	-0.0712829	0.0641737	0.0991256	-0.0586929	-0.0087902	0.16028	0.0818736	0.0465801	0.000807717	-0.128006	-0.205647	0.0345967	-0.0534628	-0.0609792
REACTOME_GLYCOSAMINOGLYCAN_METABOLISM	-0.318228	0.0640282	0.0456626	0.104563	-0.0104003	0.00960778	0.14758	-0.0064598	-0.0718924	-0.191007	-0.025922	-0.142317	-0.0824751	-0.0385195	-0.213518	0.0108722	-0.0985144	-0.0869136	-0.0717616	-0.0497207	-0.126787	-0.0739342	-0.0722029	-0.0396686	-0.101941	-0.175952	-0.0404951	-0.169959	-0.0528365	-0.146364	-0.163711	-0.0743866	-0.208056	-0.0693238	0.0568172	-0.234704	-0.011406	-0.16423	0.19687	-0.141986	-0.117715	-0.116682	-0.0563231	-0.133719	-0.0675952	-0.279639	-0.14617	-0.255748	-0.36027
REACTOME_POST_TRANSLATIONAL_MODIFICATION_SYNTHESIS_OF_GPI_ANCHORED_PROTEINS	-0.156313	-0.0733314	-0.0975392	-0.0371895	-0.039633	0.0217231	-0.0654299	-0.357186	0.00837627	-0.080957	-0.151099	0.13763	-0.379489	0.034789	0.0038241	-0.246193	0.0999485	-0.35172	-0.105716	-0.102481	-0.0327077	0.0413173	-0.445437	0.169797	-0.012796	-0.132641	-0.0830421	-0.00461733	-0.0512656	-0.127361	-0.0328058	-0.397432	-0.187524	-0.255225	-0.138211	-0.383614	-0.183302	-0.0743535	0.020131	-0.0939722	-0.139135	-0.209211	-0.297623	-0.103519	-0.025804	0.0844819	-0.208161	-0.196837	-0.270856
REACTOME_RESPIRATORY_ELECTRON_TRANSPORT_ATP_SYNTHESIS_BY_CHEMIOSMOTIC_COUPLING_AND_HEAT_PRODUCTION_BY_UNCOUPLING_PROTEINS_	0.11315	0.14096	0.0688799	0.0257904	-0.0463403	0.142382	0.0426314	0.14408	0.180008	0.160214	0.15693	-0.0395789	0.0729571	-0.0834718	0.0430834	0.157304	-0.10367	0.112746	0.0521719	-0.00715415	-0.0614478	-0.0387423	0.00390098	0.03506	0.0400045	0.0314913	-0.0848161	-0.20606	-0.202817	-0.0821381	-0.0825322	0.215115	0.0150963	-0.111591	0.0421153	0.113802	-0.0899374	0.0205636	-0.053052	-0.0762945	0.0655921	0.179352	0.0708171	-0.00966217	-0.126536	0.152421	0.0438832	0.104827	0.05734
REACTOME_FORMATION_OF_ATP_BY_CHEMIOSMOTIC_COUPLING	0.175456	0.213426	-0.226255	-0.316188	-0.31574	-0.310841	-0.0552509	-0.142433	0.178371	0.09241	0.483405	0.0429035	-0.149563	-0.310381	0.158563	0.310642	-0.612811	-0.183747	-0.480315	-0.24575	-0.307025	-0.399649	-0.133253	0.0448533	-0.215065	-0.367185	-0.216347	-0.462269	-0.244075	-0.0255237	-0.441436	0.0141736	-0.253942	-0.499959	-0.399184	-0.176923	-0.0212742	-0.358908	-0.036512	-0.230818	-0.105741	-0.114974	-0.249913	-0.125134	-0.261522	-0.30681	-0.00964769	0.18225	-0.350458
REACTOME_GLUCAGON_SIGNALING_IN_METABOLIC_REGULATION	-0.114692	0.506633	-0.101228	0.277626	0.0807305	-0.451315	-0.27485	-0.257234	0.215651	0.105552	-0.273135	0.0489283	0.177382	-0.0830549	0.00105663	-0.212346	0.00046342	-0.0659811	0.276207	0.129158	-0.0098744	0.46153	0.121342	-0.318046	0.121543	-0.260229	-0.258931	0.417408	-0.21941	-0.33852	0.425033	-0.201377	0.189506	-0.188	0.111529	0.207511	0.16093	0.280196	-0.0624327	-0.182673	0.391369	0.0179156	0.209535	0.207081	0.0555925	0.135496	0.419934	0.369955	0.0725071
REACTOME_TRIGLYCERIDE_CATABOLISM	-0.393808	0.345242	0.169116	0.203511	-0.357563	-0.261878	-0.357155	-0.457416	0.313277	0.271439	0.0720796	-0.166571	0.338827	0.259227	-0.280473	-0.0184429	-0.260987	-0.206896	0.448135	-0.309707	0.507079	0.196523	0.416221	-0.255151	0.127075	0.114584	-0.323967	-0.0854525	-0.0715253	0.368126	-0.0232408	0.102484	0.301537	0.346442	0.264571	0.529054	0.323801	-0.238806	0.381688	0.204408	-0.259651	0.00558049	0.624467	0.03079	0.345973	-0.28527	0.228501	0.572523	0.335094
REACTOME_INTEGRATION_OF_ENERGY_METABOLISM	-0.253055	-0.0605988	-0.273226	-0.0878877	-0.0654672	-0.150102	0.00240445	-0.103112	-0.112415	0.040944	-0.170474	0.0432474	0.009342	0.0325601	0.232898	-0.105944	0.117804	0.147671	0.00542759	0.0988376	0.0371353	0.193486	0.0527272	0.0232501	0.151121	0.0173814	0.0299308	0.222681	0.00147421	0.185426	0.0729501	-0.0224686	0.112584	-0.113573	0.239367	0.0240931	0.128968	-0.0515124	-0.134413	0.025498	0.0783653	0.155997	0.072459	0.0967417	0.112955	-0.0273559	0.1144	0.0590452	-0.0189877
REACTOME_KERATAN_SULFATE_KERATIN_METABOLISM	-0.139994	0.244854	0.18858	0.231707	-0.22583	-0.0966567	0.178432	-0.00941644	-0.0785583	-0.0739355	-0.131224	-0.0478303	0.0787295	0.0459748	-0.249343	-0.109374	0.0287985	0.132533	-0.342554	-0.0200428	0.00432582	0.0752679	-0.21025	0.207916	-0.0466603	-0.338582	0.0459984	-0.185383	0.154299	-0.136951	-0.0806779	-0.279839	-0.251241	0.0829828	0.125801	-0.236825	0.14013	-0.0230088	0.25964	-0.0964415	-0.275177	-0.263381	-0.0375717	-0.252303	0.204988	-0.235535	-0.167821	-0.182996	-0.418508
REACTOME_HEPARAN_SULFATE_HEPARIN_HS_GAG_METABOLISM	-0.264548	-0.246168	-0.181201	-0.300499	-0.00377969	-0.0488108	-0.0398792	0.0919584	-0.105099	-0.195808	-0.0133292	-0.217024	-0.146812	0.0214724	-0.00855941	0.155031	-0.316002	-0.0172258	0.0874957	-0.108569	-0.14934	-0.0481191	0.0743655	0.0184201	0.0707758	0.115006	0.0323087	-0.198662	0.0322179	-0.0235535	0.0971479	0.107951	-0.0138588	0.010422	0.0014261	-0.224246	0.0512424	-0.138425	0.0402407	-0.107397	-0.0316523	-0.170626	0.0639228	-0.025045	0.0587571	-0.0610871	-0.098769	0.0388096	-0.342696
REACTOME_GAMMA_CARBOXYLATION_HYPUSINE_FORMATION_AND_ARYLSULFATASE_ACTIVATION	-0.208127	-0.173242	-0.058962	0.404066	-0.4261	0.215683	0.293596	0.0465007	-0.0698267	0.0379929	-0.100184	0.494274	-0.603986	-0.346533	-0.13232	-0.223816	0.484143	-0.0676661	-0.379792	0.217998	-0.151563	-0.434104	-0.584349	0.319204	0.0679804	-0.0180387	0.145699	-0.354835	0.327033	-0.585481	0.201959	0.036948	-0.368488	-0.17929	0.214532	-0.546074	0.0206888	-0.360979	-0.308214	-0.384914	-0.473153	-0.33077	-0.412882	-0.130541	0.349212	-0.393676	-0.297092	-0.195321	-0.517278
REACTOME_CELL_CYCLE	0.0800104	0.0353657	-0.0580297	0.0574398	0.0504596	-0.105494	-0.0273225	0.0243473	0.00895984	-0.069133	0.0521643	-0.134421	-0.0466917	-0.129735	0.0431737	-0.103021	-0.0206255	-0.0264467	-0.0853366	-0.0701442	0.0103155	0.152119	-0.0195427	-0.067508	0.150876	-0.00914814	-0.100938	0.0373024	-0.086558	-0.070092	-0.0536376	0.0263404	-0.0115238	-0.051257	-0.0064494	0.0131239	-0.0661054	-0.0839046	-0.0792631	-0.0508605	-0.0098915	-0.0168357	-0.0541005	-0.00171043	0.0110817	-0.185172	-0.000432788	-0.0751649	-0.0586514
REACTOME_SIGNALING_BY_EGFR_IN_CANCER	-0.276571	0.551765	-0.336531	0.450094	0.548188	0.540189	0.361111	0.57874	0.115238	-0.322817	-0.04776	-0.146856	0.503733	0.129195	0.311123	-0.215443	0.219784	-0.24822	0.51194	0.138878	-0.0889412	0.639433	0.50849	0.645816	0.230021	-0.325422	0.465897	0.583147	0.419064	0.547231	-0.0187715	0.445321	-0.192035	0.613117	-0.127944	0.430722	0.461421	0.477352	0.552066	0.556314	0.774866	0.492056	0.645501	0.571504	-0.491028	-0.280321	-0.0130261	0.130263	-0.103668
REACTOME_NEF_MEDIATES_DOWN_MODULATION_OF_CELL_SURFACE_RECEPTORS_BY_RECRUITING_THEM_TO_CLATHRIN_ADAPTERS	0.172518	-0.359401	0.119345	-0.115457	0.0592594	-0.00508995	-0.345382	0.00679746	-0.00464767	-0.0941441	0.222779	0.279937	-0.34643	-0.286613	0.174261	-0.031572	-0.42846	-0.243458	-0.289811	0.330187	-0.363282	-0.562807	0.222862	-0.0914929	-0.0298533	0.0714911	0.11889	0.299521	-0.0647379	-0.290303	-0.398596	-0.293468	-0.43707	-0.33387	-0.4152	-0.225009	0.00692639	-0.0500194	-0.0500778	-0.403526	-0.0821601	0.0626695	-0.224565	0.0900986	0.0264197	-0.346182	-0.107953	0.00837718	-0.312344
REACTOME_THE_ROLE_OF_NEF_IN_HIV_1_REPLICATION_AND_DISEASE_PATHOGENESIS	-0.0460289	-0.169745	0.074065	-0.191955	0.215889	-0.003317	-0.197938	0.0607695	-0.0875326	-0.0260608	0.275031	0.180922	-0.0202083	-0.110198	0.0763565	-0.164391	-0.198427	-0.23389	0.0529896	0.311927	-0.235593	-0.349187	0.356291	-0.00018092	0.2178	0.0683181	0.155145	0.345615	-0.133752	-0.122799	-0.422999	-0.246575	-0.356903	-0.211066	-0.168138	-0.058799	0.0574464	-0.0762242	0.0776765	0.14749	-0.0426926	-0.0645075	0.182677	0.138466	-0.11378	-0.335662	-0.0205864	0.0701018	-0.125739
REACTOME_COLLAGEN_BIOSYNTHESIS_AND_MODIFYING_ENZYMES	-0.294219	0.112676	-0.115157	0.0867336	-0.290089	-0.265103	0.00724473	-0.0758261	-0.105048	0.0244676	-0.299516	0.132895	0.034843	0.0871243	0.337311	0.364953	0.257579	0.121204	0.134155	0.166601	0.0426393	-0.073328	0.0962922	-0.0351423	-0.078228	0.193998	0.204361	-0.163596	0.134546	0.078127	0.406773	0.113886	0.24831	-0.159578	0.221127	0.241372	0.156335	0.0987163	-0.141302	-0.24182	-0.224257	-0.0449424	-0.281969	0.150216	0.132508	0.0920098	0.0688669	-0.109317	0.135157
REACTOME_MTOR_SIGNALLING	-0.226638	0.191722	-0.290262	-0.290348	0.161454	-0.265744	-0.134686	0.151577	-0.26758	-0.254301	0.0055876	0.307295	0.261236	0.241196	0.0045567	0.0968109	0.191157	0.0918464	0.264475	0.0919255	0.116785	0.33751	0.485792	0.39304	0.103141	0.0811393	0.034106	0.279661	-0.00638397	0.166378	0.256995	0.114506	0.28361	0.382807	0.29723	0.239762	0.335293	0.179672	0.29801	0.246747	0.132793	0.2138	0.164026	0.0213893	0.306353	-0.0122221	0.312017	0.103282	0.113271
REACTOME_REGULATION_OF_CHOLESTEROL_BIOSYNTHESIS_BY_SREBP_SREBF_	-0.238882	-0.226793	0.0587918	0.00854346	-0.0883861	0.029185	-0.0324883	0.0374625	0.0993418	0.129314	-0.200937	-0.0841661	-0.16243	0.139157	-0.107689	-0.246264	-0.043732	0.0250609	-0.099377	0.240232	0.0103056	0.160502	-0.316091	-0.175794	-0.261777	-0.00949378	-0.165609	0.126632	-0.215089	-0.00985709	-0.275473	-0.0941607	0.218355	-0.000253277	-0.12739	0.0756004	0.216501	-0.278231	-0.179883	-0.225817	-0.0947984	0.0848373	-0.0776071	-0.267271	-0.186156	-0.208271	0.0568574	-0.260183	-0.304941
REACTOME_TOLL_LIKE_RECEPTOR_4_TLR4_CASCADE	-0.176877	-0.0560606	-0.274135	-0.238385	0.0164875	-0.108737	-0.152235	0.0441899	-0.134589	-0.358365	-0.0583582	-0.132565	-0.00583416	-0.0347802	-0.0715762	-0.167436	-0.0344311	-0.323986	-0.0544964	-0.154921	-0.254151	0.000939013	0.112804	0.213823	-0.0248495	-0.00296384	-0.0678532	0.156963	-0.0880602	0.018355	-0.210349	-0.103194	-0.232732	-0.0114382	-0.156073	-0.0192774	-0.0251892	-0.0186132	0.0125165	0.0723449	0.147132	0.123256	0.170105	0.149952	-0.0807802	-0.16704	-0.0715472	-0.0366943	-0.235321
REACTOME_SYNTHESIS_OF_PIPS_AT_THE_PLASMA_MEMBRANE	0.0780716	0.217268	0.00847839	0.256164	-0.0215534	0.0972097	0.0280214	0.161661	0.183824	0.0861952	0.120107	0.295415	-0.111899	0.246242	0.0246631	-0.107782	0.153403	-0.136934	0.143007	0.227147	0.0392518	0.30666	0.0788008	0.334098	0.197555	0.100606	0.096388	0.169866	-0.0893861	0.290886	-0.102218	-0.0212775	0.200591	0.243035	0.274419	-0.0279827	0.0966076	0.081908	0.0219424	0.10758	0.415667	0.191765	0.24091	0.151806	0.0758202	0.0747314	0.0401059	-0.140746	0.036885
REACTOME_SPHINGOLIPID_DE_NOVO_BIOSYNTHESIS	0.16373	0.280615	0.0308034	0.100019	-0.131479	0.434588	0.161602	-0.022191	0.255417	0.160887	0.158343	0.264449	0.0704841	0.161382	0.0848881	0.0710863	0.134328	-0.0991724	0.286878	0.0499198	0.202537	0.222607	0.37166	0.321649	0.0599596	0.0478119	0.240637	0.293563	-0.193978	0.230049	0.389943	0.159935	0.176727	0.131959	0.254356	0.203376	0.171602	0.313758	0.120287	0.170022	0.00998407	-0.1589	0.421329	0.305603	0.214566	0.354277	0.319801	0.171483	0.222874
REACTOME_GLYCOSPHINGOLIPID_METABOLISM	0.287763	0.174931	0.0772952	-0.286133	-0.194608	0.0658989	0.253888	0.0719357	0.186638	0.163577	-0.0636922	-0.104476	-0.0533421	-0.0727563	-0.0988023	-0.27002	-0.1105	0.125005	0.0388325	-0.0181589	-0.064048	0.225775	-0.0599217	0.297458	-0.0452574	0.212312	0.278919	-0.0728787	0.112827	-0.0170433	0.128596	0.026471	-0.156721	0.208723	0.193251	-0.104019	0.321496	0.00184437	-0.0103066	0.00404198	0.290007	0.169589	-0.084324	-0.109431	0.0283458	0.265083	0.044772	0.0301412	-0.0463707
REACTOME_MYD88_INDEPENDENT_TLR4_CASCADE_	-0.148691	-0.14135	-0.330867	-0.330045	0.0143863	-0.0299042	-0.0598833	-0.0783966	-0.138272	-0.361777	-0.104256	-0.0424277	0.0499467	0.0535418	0.108283	-0.114224	0.0154879	-0.208554	0.045905	-0.0720415	-0.257887	0.0714188	0.0866941	0.319822	0.050217	-0.0156158	-0.0585198	0.159089	0.032662	0.0731256	-0.0907035	-0.0713955	-0.192272	0.0362469	-0.13878	0.0331227	-0.0482042	0.000433949	0.036502	0.0959815	0.148337	0.111748	0.218003	0.188773	-0.0520834	-0.224368	-0.0241773	-0.0732096	-0.238716
REACTOME_MTORC1_MEDIATED_SIGNALLING	0.0568451	0.239526	-0.252226	-0.207507	0.3646	-0.132265	-0.324626	0.120374	-0.167829	-0.339034	-0.0189638	0.463638	0.364577	0.00147092	-0.0739429	0.130156	0.30955	0.165686	0.251809	0.0332671	0.177985	0.322277	0.438295	0.540785	0.00572272	0.117821	0.150416	0.315796	0.0989867	0.275383	0.408717	0.296437	0.475873	0.341167	0.383477	0.334474	0.351184	0.229114	0.422993	0.449193	0.120029	0.409008	0.0285321	-0.0755598	0.361184	-0.150103	0.0138911	-0.058128	0.192198
REACTOME_SIGNALING_BY_NTRKS	0.00049727	0.105509	-0.0278991	-0.175781	0.0784365	-0.0544202	-0.171413	0.0459166	-0.0367537	-0.0725995	0.143929	-0.164076	0.0102583	0.0209927	0.0832116	0.00641696	-0.121597	-0.181943	-0.199516	-0.132621	-0.135713	-0.0480347	0.192858	0.0939077	-0.044053	0.112548	0.0511159	-0.127696	-0.259561	-0.0752538	-0.193128	-0.0352413	-0.239423	-0.135964	0.0520391	-0.142758	-0.00223673	-0.121702	0.0182818	-0.00711223	-0.098122	0.1102	0.16687	0.207364	0.00260215	-0.169569	-0.332163	0.0966137	-0.152985
REACTOME_COMPLEMENT_CASCADE	0.13892	0.0163131	-0.066139	-0.398949	-0.470468	0.22663	-0.0863214	-0.230777	-0.293256	-0.149987	0.237815	0.25942	-0.387965	-0.377552	-0.0324415	-0.101362	0.0751518	0.0469771	0.0246495	0.340438	-0.22596	-0.692833	-0.427405	-0.149717	-0.613078	-0.46829	-0.0470185	-0.730129	0.364838	-0.409042	0.133508	-0.178263	-0.334197	-0.611103	0.0961375	0.121419	0.368409	-0.0564888	-0.0300563	-0.292319	-0.64688	0.317212	0.0303483	0.238688	0.0617051	0.121167	0.0670242	-0.472294	0.281134
REACTOME_INITIAL_TRIGGERING_OF_COMPLEMENT	0.00155053	0.0687507	-0.268406	-0.600864	-0.349473	0.400034	0.016753	-0.307006	-0.145824	-0.059657	0.320363	0.211828	-0.208312	-0.334901	-0.0854651	-0.39834	-0.0837885	-0.0378447	-0.0231452	0.348312	-0.179519	-0.688306	-0.116399	-0.205726	-0.591582	-0.546736	-0.232305	-0.701373	0.191403	-0.224312	0.275126	0.101643	-0.355062	-0.594241	-0.174275	0.227525	0.265253	-0.213189	0.0137771	-0.0728099	-0.471158	0.233178	0.0562089	0.233731	0.125808	0.189081	-0.170248	-0.524144	0.263648
REACTOME_CREATION_OF_C4_AND_C2_ACTIVATORS	-0.0109778	0.0094741	-0.234116	-0.655889	-0.0608169	0.492007	0.180703	-0.284572	-0.0341798	-0.174965	0.134039	0.193033	-0.0480573	-0.487075	-0.320822	-0.532389	-0.142847	-0.331624	-0.000967841	0.389723	-0.329148	-0.665248	-0.00866707	-0.334044	-0.658284	-0.631501	-0.435224	-0.651075	0.0715614	-0.354191	0.115758	-0.0556958	-0.510359	-0.618949	-0.106757	0.119951	0.449138	-0.187311	0.29991	0.211954	-0.192797	0.313212	0.289602	0.359626	0.414634	0.464108	-0.037164	-0.528978	0.0620945
REACTOME_HIV_TRANSCRIPTION_ELONGATION	0.107392	0.442202	0.334801	0.206625	0.137429	0.456067	0.305412	0.314003	0.253825	0.263374	0.308861	-0.18373	-0.224908	-0.248449	0.0125761	-0.0769996	0.210333	0.157602	0.0807293	-0.115917	0.0368411	0.14687	-0.032609	0.273626	0.0767457	0.363961	0.0189521	-0.361112	0.20453	-0.159908	-0.137463	-0.149836	0.0111959	0.110212	-0.160233	-0.158316	-0.281691	-0.147028	-0.0580251	-0.0038253	0.14757	-0.080286	-0.227799	-0.0117338	-0.151439	-0.325968	-0.369273	-0.371279	-0.0739072
REACTOME_TRANSCRIPTION_OF_THE_HIV_GENOME	-0.130673	0.263809	0.209383	0.0898817	0.0531515	0.330269	0.202869	0.148109	0.116398	0.103775	0.101067	-0.24803	-0.299051	-0.117883	0.0674634	-0.0119358	0.201364	0.174589	0.132039	-0.0524129	0.163141	0.14979	-0.0220771	0.155462	0.0489561	0.325317	0.146404	-0.326093	0.139186	-0.0998915	-0.195579	-0.00910611	0.115607	0.112739	-0.254162	-0.304046	-0.369254	-0.0787848	-0.0616962	0.0355029	0.0146689	-0.0816867	-0.195643	0.0761786	-0.144246	-0.12748	-0.378015	-0.19932	-0.0858668
REACTOME_ABORTIVE_ELONGATION_OF_HIV_1_TRANSCRIPT_IN_THE_ABSENCE_OF_TAT	0.151531	0.390055	0.36024	0.132303	-0.0777809	0.425964	0.128794	0.201102	0.191096	0.241457	0.250661	0.00190151	0.0271402	-0.350542	0.19076	0.210901	0.304665	0.238998	0.110905	-0.355699	0.196173	0.291099	-0.113334	0.42066	0.280718	0.302076	0.0160385	-0.304539	0.110137	-0.147668	0.0789006	0.060095	-0.053124	-0.234975	-0.107143	-0.0953602	-0.430498	-0.266426	-0.0583074	0.0707137	0.159117	-0.316858	-0.263494	-0.0334299	-0.00801228	-0.209205	-0.354936	-0.375905	-0.0916077
REACTOME_HIV_ELONGATION_ARREST_AND_RECOVERY	-0.125485	0.365535	0.277354	0.261872	0.197995	0.439552	0.299007	0.241548	0.311537	0.243249	0.161531	-0.132152	-0.298617	-0.150327	-0.0845895	-0.171055	0.212473	0.161898	0.0257177	0.042671	0.0483677	0.0865618	-0.0466542	0.103248	0.0210281	0.309945	0.05327	-0.360976	0.0833157	0.00407046	-0.190082	-0.145852	0.156079	0.139156	-0.233212	-0.232287	-0.265581	-0.231084	-0.259619	-0.00471116	-0.0927651	-0.0195353	-0.156558	-0.00115166	-0.254047	-0.16903	-0.319116	-0.207059	-0.0537553
REACTOME_TOLL_LIKE_RECEPTOR_9_TLR9_CASCADE	0.0454689	0.0215143	-0.186404	-0.141395	0.163099	0.146166	0.145305	0.0765505	0.0342342	-0.220137	0.0467301	0.150429	0.134129	0.0891872	0.242482	-0.0243736	0.133142	-0.140505	0.169408	0.0297172	-0.122399	0.161481	0.180961	0.38064	0.0863959	0.0206402	-0.00525952	0.199097	0.202317	0.167568	0.0635441	0.0383313	-0.103249	0.105186	-0.0644483	0.0947961	0.0638081	0.15253	0.126544	0.246033	0.174337	0.254778	0.319031	0.312718	-0.00423507	-0.170545	0.0887452	0.0208422	-0.149104
REACTOME_TOLL_LIKE_RECEPTOR_10_TLR10_CASCADE	-0.0361234	-0.0914873	-0.295682	-0.261871	0.0682454	0.141098	0.132823	-0.0105682	-0.075572	-0.240502	0.0433656	0.0494497	0.158933	-0.0135325	0.230184	-0.0739759	0.0352313	-0.166322	0.129881	0.0246547	-0.193253	0.152282	0.200488	0.374504	0.0919494	-0.0221837	0.00124564	0.206629	0.156361	0.192463	0.0259039	-0.0355078	-0.174984	0.0533165	-0.0447313	0.0770579	0.0131276	0.0616817	0.0720212	0.156508	0.189292	0.203303	0.3158	0.265704	-0.0755673	-0.222823	-0.00295514	-0.0387749	-0.225094
REACTOME_TOLL_LIKE_RECEPTOR_TLR1_TLR2_CASCADE	-0.0747404	-0.0955878	-0.306999	-0.264287	0.0535825	0.0395372	0.0352235	-0.0339378	-0.103653	-0.303485	-0.0335044	0.0230159	0.0573715	0.00212664	0.177918	-0.140982	0.0096175	-0.228275	0.0885783	-0.0273665	-0.252363	0.0734774	0.100558	0.357553	0.0129022	-0.0527695	-0.0654153	0.164702	0.0826733	0.084108	-0.0477746	-0.0952587	-0.229483	0.0205912	-0.111905	0.0107473	-0.00949534	0.020086	0.0455193	0.156634	0.103389	0.163227	0.279224	0.205879	-0.0829891	-0.242432	-0.0425332	-0.0971786	-0.234635
REACTOME_INFLUENZA_INFECTION	-0.0140627	-0.156172	-0.0880471	0.0122911	0.116034	0.00250342	-0.0611374	0.124927	0.0621161	-0.0354268	0.00466767	-0.0898272	0.0689351	0.146495	0.0411047	-0.0473344	0.025158	-0.0307909	0.104483	-0.10175	2.07641e-05	0.21429	0.0859594	0.0009783	0.182835	0.179735	0.0650169	0.0860735	0.0232117	0.0561469	-0.0510524	0.172218	-0.0759714	0.0747098	0.196792	0.0817317	0.130469	0.174842	0.0487223	0.044314	0.131915	-0.0062273	0.0686488	0.048001	0.0185295	-0.0387505	0.0525818	0.0308555	0.0112389
REACTOME_EXPORT_OF_VIRAL_RIBONUCLEOPROTEINS_FROM_NUCLEUS	-0.143151	-0.288198	0.208202	-0.0516176	0.209317	-0.169918	-0.158546	0.208655	0.109243	-0.0254157	-0.143182	-0.0926567	0.0975375	0.187229	0.154767	-0.152654	0.233396	-0.0215749	0.288001	0.171667	0.279591	0.0888773	0.164656	0.115153	0.279608	0.0942717	-0.0168584	0.357406	-0.0573805	0.0510933	-0.144722	0.304147	0.179452	0.0638278	0.382298	0.0926591	0.354658	0.288004	0.0399883	-0.038974	0.164538	0.12403	0.166818	-0.0656621	0.0167631	-0.0101173	0.204278	0.134728	-0.0414434
REACTOME_NS1_MEDIATED_EFFECTS_ON_HOST_PATHWAYS	-0.111813	-0.202924	0.0636123	-0.0818215	0.194416	-0.163549	-0.147349	0.168726	-0.0363442	-0.0646093	-0.123633	-0.0432376	0.148778	0.0946939	-0.0105621	-0.0595804	0.200117	0.0552086	0.278965	0.104233	0.214882	0.12605	0.290987	-0.0011307	0.231332	0.153844	0.12917	0.340093	-0.0983745	0.201082	-0.173159	0.191187	0.135442	0.0732179	0.306078	0.0791276	0.338367	0.181927	-0.0145099	-0.00822804	0.191339	0.0129251	0.214778	0.160622	0.219584	0.0889986	0.240154	0.039667	0.043836
REACTOME_VIRAL_MESSENGER_RNA_SYNTHESIS	-0.0276599	-0.176015	0.215987	0.109767	0.257871	0.0112061	-0.0637967	0.191706	0.188743	0.040438	-0.0281659	0.076452	0.184478	0.145315	0.14348	-0.076401	0.301527	0.0380939	0.287721	0.222204	0.328917	0.178823	0.326707	0.144495	0.248757	0.254156	0.124427	0.239181	-0.0793996	0.204669	-0.0343578	0.235896	0.162814	0.0101741	0.189444	0.152777	0.321714	0.164934	-0.0385817	-0.0313261	0.213511	-0.023419	0.150416	0.0616101	0.132673	0.08297	0.200519	0.0296912	0.0983201
REACTOME_NOD1_2_SIGNALING_PATHWAY	-0.389887	0.245568	-0.271791	0.321738	0.331209	0.32666	0.15822	0.42056	0.156124	-0.3132	-0.233701	-0.305399	0.215469	-0.345079	-0.0780667	-0.426831	0.0763792	-0.482214	-0.0394673	0.00925201	-0.422691	0.423375	0.326819	0.186743	0.260301	-0.220249	-0.290686	0.257339	0.0685966	0.233114	-0.191301	-0.156643	-0.376713	0.237676	-0.367251	0.12765	0.177379	0.26988	0.237463	0.383788	0.231638	-0.0456453	0.347354	0.194475	-0.450132	-0.427883	-0.039197	-0.260227	-0.514626
REACTOME_NUCLEOTIDE_BINDING_DOMAIN_LEUCINE_RICH_REPEAT_CONTAINING_RECEPTOR_NLR_SIGNALING_PATHWAYS	-0.0542562	0.287768	-0.0966975	0.292176	0.214825	0.379738	0.0995042	0.319061	0.103397	-0.134195	-0.148354	-0.287307	0.158391	-0.434079	-0.111934	-0.368957	-0.0508916	-0.344964	0.211353	0.149771	-0.225648	0.418247	0.0287573	0.213139	0.241319	-0.271614	-0.291628	0.158772	0.0467217	0.0512418	0.0138126	-0.112737	-0.322642	0.0131217	-0.425097	-0.0297062	-0.201611	0.271811	0.304532	0.290492	0.427236	0.171787	0.299457	0.0902573	-0.273464	-0.272777	-0.101423	-0.310808	-0.383434
REACTOME_TOLL_LIKE_RECEPTOR_CASCADES	0.0357912	-0.00880254	-0.161436	-0.214568	0.0797144	-0.0501708	-0.0765874	0.0299257	-0.0985847	-0.246619	-0.0347779	-0.119176	0.0673916	0.0306226	-0.00593595	-0.176861	-0.0922811	-0.266313	-0.0275144	-0.0201679	-0.223579	-0.0397249	0.114831	0.13031	-0.0366954	-0.0718515	-0.0339067	0.113491	-0.0980539	0.0529646	-0.0936264	-0.156497	-0.219756	-0.0511696	-0.163289	-0.00435623	0.0088937	0.108228	0.118329	0.167211	0.0677271	0.174612	0.186749	0.211465	-0.0905595	-0.0924706	0.0446159	-0.00550743	-0.127397
REACTOME_TICAM1_RIP1_MEDIATED_IKK_COMPLEX_RECRUITMENT	-0.522497	0.330191	-0.444909	0.444308	0.325466	0.436481	0.256004	0.444444	0.0170584	-0.553372	-0.459259	-0.534558	0.116217	-0.60809	-0.243578	-0.659713	0.144649	-0.663927	-0.058925	-0.0624686	-0.647196	0.226905	0.365565	0.176351	-0.117939	-0.574474	-0.505098	0.458078	0.0974462	0.1894	-0.58003	-0.263207	-0.610581	-0.068007	-0.632413	-0.175418	-0.0178417	0.0407046	0.158874	0.402948	0.241941	-0.314815	0.409395	0.0704622	-0.581164	-0.681689	-0.44297	-0.59187	-0.69865
REACTOME_DDX58_IFIH1_MEDIATED_INDUCTION_OF_INTERFERON_ALPHA_BETA	-0.171056	0.171147	-0.265571	-0.00332016	0.0444243	0.183479	0.157548	0.0545549	0.0592881	-0.249746	-0.0668774	-0.112321	0.0199348	-0.1579	-0.141434	-0.27418	-0.0595311	-0.238512	0.18018	0.0823139	-0.284705	0.218889	0.0979148	0.297381	0.176151	-0.17255	0.00523553	0.0742795	0.168538	0.290815	-0.119058	-0.0293419	-0.250047	0.260881	-0.220464	0.174295	-0.204153	0.148615	0.0172868	0.170375	0.284415	0.0192514	0.201456	0.11874	-0.339364	-0.104958	0.0386726	-0.210365	-0.343338
REACTOME_REGULATION_OF_GLUCOKINASE_BY_GLUCOKINASE_REGULATORY_PROTEIN	-0.140741	-0.303091	0.0995953	-0.0675169	0.291454	-0.169023	-0.112392	0.186614	0.0595169	-0.034179	-0.0798878	0.0397271	0.148086	0.155881	0.0830715	-0.0408199	0.270981	0.0212869	0.32318	0.212561	0.2837	0.0977373	0.342382	0.0697735	0.265595	0.18754	0.121784	0.336035	-0.0879496	0.227715	-0.138386	0.213807	0.169852	0.0678409	0.335573	0.100143	0.384179	0.261351	0.0365759	-0.0434046	0.195499	0.0056351	0.181638	0.112602	0.177072	0.0792385	0.265992	0.0718737	0.031822
REACTOME_SIGNALING_BY_TGF_BETA_RECEPTOR_COMPLEX	-0.148602	0.280277	-0.0143045	-0.018059	0.191123	0.0300195	-0.0306601	-0.123906	0.0892352	0.0592059	-0.0485029	-0.484762	0.0561671	0.0698606	-0.0767078	-0.270616	-0.213406	-0.345748	-0.0559246	-0.448126	-0.0808049	0.114325	0.195748	-0.270219	0.0841422	-0.400203	-0.259375	-0.168061	-0.193152	0.347904	-0.136896	0.266353	-0.0538176	0.18732	-0.136133	0.152464	0.111034	0.150011	0.0544673	0.190314	0.0725074	0.225839	0.233741	0.227839	-0.155154	-0.372503	0.140612	-0.0577471	-0.000348588
REACTOME_APC_C_MEDIATED_DEGRADATION_OF_CELL_CYCLE_PROTEINS	-0.311228	-0.0589636	-0.282238	-0.102743	0.167073	-0.0341591	0.0589646	-0.0249437	0.0177542	-0.204329	-0.114351	-0.0218705	-0.176591	-0.189502	0.361049	-0.19667	0.137615	-0.197343	-0.0249833	-0.00796511	-0.237377	0.259194	0.0882212	0.00789072	0.0222066	-0.243796	-0.0964899	0.345175	0.157867	-0.252242	0.0321549	0.136778	-0.260623	0.0319719	-0.102938	-0.134428	0.0496706	0.0701124	-0.126278	-0.00439508	0.215356	0.0839592	-0.00837657	0.0148751	-0.16712	-0.245677	0.021248	-0.132141	-0.156212
REACTOME_APC_C_CDH1_MEDIATED_DEGRADATION_OF_CDC20_AND_OTHER_APC_C_CDH1_TARGETED_PROTEINS_IN_LATE_MITOSIS_EARLY_G1	-0.314881	-0.0223275	-0.32131	-0.0681497	0.101872	-0.00662577	0.00229251	-0.0168314	-0.050236	-0.14619	-0.121963	-0.0330033	-0.163731	-0.207947	0.344465	-0.239964	0.146304	-0.16058	-0.00464428	0.0598908	-0.147965	0.282665	0.051787	0.0539208	0.0697757	-0.22688	-0.0268586	0.366769	0.0723682	-0.26871	-0.0290269	0.207598	-0.269853	0.0600036	-0.0966038	-0.195228	0.148704	0.0972923	-0.110547	0.0220598	0.280151	0.123565	0.00703017	0.0600561	-0.196657	-0.217744	0.00612231	-0.0797401	-0.170897
REACTOME_TELOMERE_C_STRAND_LAGGING_STRAND_SYNTHESIS	0.0514433	0.227753	0.314786	0.298821	0.275991	0.207448	0.192241	0.248278	0.406932	0.278627	0.101811	-0.102838	0.182407	0.193955	0.233904	-0.218296	0.0491525	-0.188349	-0.162331	0.176921	-0.215881	0.0872053	-0.0325134	0.17728	-0.0165549	0.201495	0.172646	0.0462788	-0.303088	-0.000506951	-0.196253	-0.0437874	0.0575152	0.261468	-0.172357	-0.0280748	-0.222983	0.029801	0.0686669	-0.15687	0.094871	-0.296537	0.124168	-0.198698	0.0355378	0.0708238	-0.0664158	-0.308003	-0.208373
REACTOME_PLASMA_LIPOPROTEIN_ASSEMBLY_REMODELING_AND_CLEARANCE	-0.131725	0.0501405	0.189024	0.349865	-0.102781	-0.264952	0.105013	-0.247239	0.211204	0.347253	-0.163018	0.143266	-0.372494	-0.0409634	-0.305229	-0.260176	-0.0180936	-0.277522	-0.474862	-0.151582	-0.192664	-0.0121979	-0.246674	0.0631116	-0.363967	-0.23943	0.297358	-0.434503	-0.0225153	-0.251149	-0.179601	-0.18768	0.00934231	-0.274085	0.0844042	-0.323431	0.302556	0.195041	0.0679575	-0.224042	-0.424819	-0.224932	-0.0860663	-0.218972	0.207298	0.0210229	-0.085458	0.0161948	-0.229039
REACTOME_INTERACTIONS_OF_VPR_WITH_HOST_CELLULAR_PROTEINS	-0.113069	-0.19564	0.0948982	-0.00253205	0.292422	-0.131985	-0.0813343	0.153823	0.0214348	-0.187616	-0.121424	0.0566608	0.0877735	0.0525721	0.237856	-0.078615	0.360314	0.102748	0.259419	0.225542	0.199234	0.0909773	0.271609	0.212239	0.161226	0.244046	0.0815919	0.140083	-0.110572	0.14672	-0.119349	0.0987333	0.146442	0.00659256	0.295442	0.0679394	0.243037	0.220569	0.0515	-0.0777598	0.122747	0.0163962	0.0857174	0.0818074	0.182741	0.00879667	0.128175	-0.0291637	0.122806
REACTOME_ACTIVATION_OF_ATR_IN_RESPONSE_TO_REPLICATION_STRESS	-0.194065	0.289701	0.290914	0.392122	0.188809	0.150048	0.170656	-0.258015	0.294032	0.297451	0.143617	-0.124098	0.0631047	0.102665	0.0832526	-0.256386	-0.394133	-0.112765	-0.111734	0.33898	-0.114463	0.113106	-0.27628	-0.1671	0.0159649	0.0767233	-0.0407687	0.141123	-0.283033	-0.0858192	-0.476941	-0.172789	-0.204522	-0.278235	-0.0807354	-0.023526	-0.441397	-0.171488	0.135765	-0.21003	-0.0622691	-0.499086	-0.0697349	0.0438698	-0.407769	-0.2865	0.0243211	-0.466714	-0.219078
REACTOME_INTERACTIONS_OF_REV_WITH_HOST_CELLULAR_PROTEINS	0.00580741	-0.286158	0.240322	-0.139975	0.168621	-0.180289	-0.233966	0.0866054	0.000474548	0.0742258	0.0763328	-0.13109	0.276957	0.185386	0.169339	-0.0381867	0.150263	0.0490607	0.180602	0.174362	0.356206	0.0723574	0.183631	0.0142084	0.284574	0.112331	-0.077415	0.206369	-0.116268	0.0661817	-0.111607	0.192456	0.258619	0.0187668	0.315908	0.121596	0.188709	0.216442	-0.0611778	-0.0801498	0.118158	0.119168	0.207535	-0.0502243	0.0255782	-0.0341284	0.22229	0.0968918	0.0664044
REACTOME_RETROGRADE_NEUROTROPHIN_SIGNALLING	0.230595	0.27441	0.0576774	0.103878	-0.0384967	-0.0195801	-0.156935	0.254226	0.176017	0.263898	0.469443	-0.266169	-0.120308	0.0142454	-0.26534	0.163266	-0.0217059	-0.439801	-0.643844	0.22874	-0.307332	-0.610446	0.323374	-0.392024	-0.125089	0.0970171	0.33224	-0.490829	-0.255853	-0.131199	-0.27551	0.344079	-0.274905	-0.417611	-0.409209	0.178914	0.323039	-0.178689	-0.0239138	-0.420964	-0.105366	0.439077	-0.166351	-0.122808	-0.268525	0.140748	-0.539875	0.23931	0.173772
REACTOME_SIGNALING_BY_EGFR	-0.349428	0.429021	-0.128272	0.309414	0.0829619	0.137386	0.16913	0.425235	-0.123228	-0.257164	-0.109152	0.249314	0.530582	0.254432	0.453774	0.0744054	0.520125	0.112477	0.443796	0.440556	0.236729	0.337449	0.430601	0.573099	0.178011	-0.142104	0.402521	0.39575	0.345208	0.391936	0.0729187	0.212814	0.00995756	0.293703	-0.11484	0.432034	0.342155	0.319843	0.305316	0.30163	0.437645	0.353751	0.387421	0.477579	0.0790331	-0.0125805	0.116199	0.184516	0.0606614
REACTOME_CHONDROITIN_SULFATE_DERMATAN_SULFATE_METABOLISM	-0.436897	-0.0876068	-0.0701574	-0.139527	0.101312	-0.104526	-0.0548605	0.136593	-0.192644	-0.285314	-0.101592	-0.249115	-0.221672	-0.18492	-0.133496	-0.0428653	-0.297054	-0.0255884	-0.088082	-0.2733	-0.121852	0.0180322	0.00576191	0.00473705	0.0547881	-0.239424	-0.159542	-0.271975	-0.104436	-0.160066	0.00285265	0.127398	-0.26753	-0.211032	-0.0354254	-0.328288	-0.0293584	-0.294641	0.0548292	-0.125309	-0.100169	-0.0770094	-0.0198547	-0.0958687	-0.195151	-0.235354	-0.244386	-0.234942	-0.363657
REACTOME_SRP_DEPENDENT_COTRANSLATIONAL_PROTEIN_TARGETING_TO_MEMBRANE	-0.0637977	-0.00807896	-0.0722251	0.0208516	0.196133	0.149075	0.127827	0.203522	0.140742	-0.012513	0.16898	0.173656	0.130831	0.242061	0.034702	0.031572	0.0675818	-0.0810955	0.206996	-0.12566	-0.00744118	0.242759	0.107687	0.0144414	0.25013	0.256778	0.179771	0.248033	0.182785	0.164055	0.0546004	0.271612	-0.0450813	0.22147	0.236255	0.223312	0.148578	0.24567	0.19469	0.109719	0.153016	-0.0528888	0.185414	0.110649	0.174771	0.0318123	0.111247	0.0785367	0.104493
REACTOME_DARPP_32_EVENTS	-0.151323	0.118389	0.198744	0.0553624	-0.274268	-0.451178	-0.386908	-0.179155	0.294968	0.0981983	-0.313552	0.15524	0.165398	0.116713	-0.0237771	-0.0178388	-0.0215509	-0.129862	0.414389	-0.0701373	0.119988	0.0916259	0.015626	-0.0999571	0.454523	-0.104157	-0.0177941	0.349916	-0.510465	0.0269564	0.420855	-0.129563	0.162114	-0.0985422	0.0622045	0.198901	0.190363	0.0291003	0.0293387	-0.172434	0.0231763	-0.0603925	-0.0196445	0.12747	0.330261	-0.129744	0.184675	0.0407747	-0.0208112
REACTOME_NUCLEAR_IMPORT_OF_REV_PROTEIN	-0.0208635	-0.297169	0.210558	-0.185011	0.225646	-0.260018	-0.178757	0.0877513	-0.046884	0.0465821	0.0594085	-0.0893048	0.247332	0.193	0.150864	-0.058022	0.145493	0.0212008	0.281311	0.150567	0.322258	0.0234067	0.27458	-0.0220852	0.305015	0.197934	-0.0517051	0.249035	-0.1538	0.121332	-0.171759	0.197208	0.201955	0.0756554	0.244054	0.0788809	0.251786	0.223655	-0.0375017	-0.043281	0.131928	0.0674261	0.244969	0.0117379	0.0784745	0.0325979	0.181747	0.122226	0.0655203
REACTOME_EXTENSION_OF_TELOMERES	0.133001	0.367884	0.354381	0.179408	0.0918431	0.309886	0.233	0.316765	0.333962	0.229283	0.0236999	-0.290204	0.240093	0.137337	0.193985	-0.183377	0.0510698	-0.0598212	-0.101409	0.126962	0.0168703	0.0909006	-0.0247064	0.178361	0.102251	0.377262	0.276313	0.051834	-0.262486	-0.051228	-0.0415016	-0.0911962	0.00285831	0.126464	-0.283929	-0.0121033	-0.356238	0.0417907	-0.030189	-0.221024	0.348819	-0.253204	0.272157	-0.300575	0.0573668	0.13351	0.0473889	-0.361131	-0.298246
REACTOME_RIP_MEDIATED_NFKB_ACTIVATION_VIA_ZBP1	0.214117	0.308565	0.00719006	0.237832	0.183732	0.351067	0.473443	0.298041	0.350915	-0.160955	0.0506091	0.110449	-0.450005	-0.401171	-0.273782	-0.485582	-0.219119	-0.423756	-0.020838	0.117203	0.0287567	0.217001	-0.305905	-0.174141	0.0886482	-0.381023	-0.405158	-0.319538	-0.250447	-0.310343	-0.13949	-0.305991	0.0224594	-0.149353	-0.176904	-0.106522	-0.337679	-0.375628	0.00484954	-0.210046	-0.0152647	-0.135274	0.0299469	-0.535968	-0.241811	-0.0496298	-0.328481	-0.454468	-0.395
REACTOME_EGFR_DOWNREGULATION	-0.443853	0.453995	-0.288109	0.315501	0.142766	0.315877	0.370625	0.573083	-0.0898128	-0.348535	-0.240024	0.216739	0.584974	-0.0445634	0.445542	-0.207346	0.42694	-0.0881342	0.397738	0.487376	0.0248026	0.41405	0.42501	0.569682	0.0656245	-0.241175	0.407749	0.45972	0.363688	0.478035	-0.0149468	0.354863	-0.224774	0.201333	-0.317619	0.468771	0.266525	0.468999	0.474118	0.473617	0.423113	0.344818	0.473174	0.440861	-0.139809	-0.233408	0.0687285	0.179887	-0.117308
REACTOME_CYTOSOLIC_SENSORS_OF_PATHOGEN_ASSOCIATED_DNA_	-0.208743	0.167299	-0.124178	0.240087	0.298183	0.483618	0.336804	0.400775	0.169963	-0.223371	-0.10983	-0.151859	0.0712969	-0.164142	-0.267193	-0.456178	-0.0572223	-0.386949	0.0493943	-0.0480073	-0.114866	0.222723	0.188223	0.00853035	-0.0471908	-0.334197	-0.20602	0.136726	-0.33133	0.11301	-0.323192	0.043644	-0.201029	0.00202109	-0.302058	-0.0137253	-0.155199	0.101502	0.163047	0.183788	0.380334	-0.059079	0.117291	-0.107593	-0.185851	-0.329151	-0.145022	-0.0904379	-0.372766
REACTOME_SIGNALING_BY_CYTOSOLIC_FGFR1_FUSION_MUTANTS	0.164062	0.23614	-0.0676525	0.191938	0.255646	-0.15274	0.346354	0.00783338	0.337227	0.0925587	0.282078	0.0609285	0.426617	0.126111	-0.191151	0.309617	0.231462	-0.160426	0.272332	0.31186	0.456389	0.315432	0.0682641	-0.0483142	0.537082	0.47204	0.292327	0.408431	0.250963	0.234982	0.183743	0.313817	0.0406829	0.19608	0.301211	-0.0139989	0.158456	0.168669	0.00439414	-0.0375927	-0.0601721	-0.0496466	0.262754	0.517761	0.0985965	-0.0354354	-0.0534294	-0.146249	0.229995
REACTOME_FGFR1_MUTANT_RECEPTOR_ACTIVATION	0.0016862	0.0753827	0.182193	0.320475	0.364007	-0.01557	0.248872	0.106657	0.371498	0.102255	0.124088	0.138624	0.320885	0.142928	-0.0140845	0.325634	0.126186	-0.144889	0.163683	0.18909	0.27333	0.0785288	-0.0712579	-0.119383	0.465423	0.355273	0.283743	0.216958	0.335896	0.244105	0.179512	0.28794	0.226611	0.179811	0.377983	0.215303	0.310202	0.141543	-0.00995339	-0.0267647	-0.176143	0.0159019	0.301379	0.424822	0.173313	-0.126182	0.114032	0.00304326	0.220994
REACTOME_ORGANELLE_BIOGENESIS_AND_MAINTENANCE	0.242793	0.203433	-0.125715	0.126988	-0.115898	0.0273065	0.0168535	0.0647336	-0.0756479	-0.135001	-0.0236429	0.0205504	-0.135202	-0.215254	-0.0150991	-0.151084	-0.279411	-0.174669	-0.250934	-0.114841	0.0554677	-0.0638612	-0.114955	-0.119981	0.160108	-0.0928319	-0.138075	-0.204843	0.101934	-0.126698	-0.0859175	-0.0787163	-0.18335	0.00677078	-0.14415	-0.185594	-0.0734715	-0.32314	-0.0541344	-0.151434	-0.113341	-0.0663287	-0.159669	-0.133837	0.0294433	-0.22235	-0.17431	-0.0313273	-0.164354
REACTOME_SYNTHESIS_OF_IP3_AND_IP4_IN_THE_CYTOSOL	0.409099	0.215425	0.275178	0.390111	-0.0115957	0.460944	0.347271	0.587821	-0.0467768	0.22232	0.0692997	0.499156	0.526416	0.0912304	0.346937	0.433952	0.466035	0.418088	0.194486	0.417885	0.381811	0.392397	0.165017	0.276961	0.502831	0.0963461	0.00296849	0.592476	0.191627	0.486504	0.36903	0.606712	0.571092	0.464556	0.337718	0.50976	0.480443	0.398425	0.240359	0.44105	0.368815	0.413738	0.170532	0.166398	0.430347	0.608662	0.0403237	0.269001	0.408847
REACTOME_DOWNSTREAM_SIGNAL_TRANSDUCTION	-0.0256804	-0.0324418	0.137662	0.0649547	0.166956	0.0224332	-0.0412553	0.160103	-0.0852731	-0.0011873	0.113851	-0.0713083	0.285412	0.00633043	-0.0394022	0.239978	0.239713	0.000395826	0.145962	0.0444792	0.281753	0.419773	0.260262	0.278302	0.191059	0.222402	0.167184	0.143987	0.126558	0.296642	0.0216184	0.0359949	-0.030547	0.419112	0.243688	0.11989	0.0876211	0.0991861	0.0767839	0.269537	0.335728	0.00946581	0.20638	0.329811	0.272398	0.0360252	0.134193	0.28983	0.00475557
REACTOME_SIGNALING_BY_PDGF	-0.0100303	0.0097279	-0.0684676	-0.0895325	-0.123485	0.0488343	-0.0996746	0.063146	-0.0603448	0.101948	-0.0995988	0.0116418	0.160579	-0.00308782	0.166426	0.196096	0.228026	0.102191	0.128194	0.0765347	-0.000976432	0.0382215	0.0654868	0.041763	-0.0937779	0.181107	0.105342	-0.198633	0.21635	0.0322079	0.278084	0.137276	0.131875	0.0974968	0.245831	0.0709913	0.00387207	0.0739309	0.0685228	0.0124247	0.0757931	-0.128324	-0.0811309	0.345326	0.262698	0.126054	-0.10312	-0.0124609	0.168217
REACTOME_SCF_SKP2_MEDIATED_DEGRADATION_OF_P27_P21	-0.319871	-0.0574089	-0.356492	-0.0988781	0.131375	-0.0447891	0.0343948	-0.0302246	-0.0441501	-0.187988	-0.105222	0.0241474	-0.199266	-0.170057	0.354559	-0.240103	0.154765	-0.236948	-0.0284851	-0.00813181	-0.204608	0.288451	0.0649551	0.00491069	0.063907	-0.282405	-0.0731455	0.351791	0.0933242	-0.305561	-0.0295552	0.130686	-0.248509	0.0396172	-0.0689893	-0.21071	0.110167	0.0510459	-0.159516	-0.0158604	0.281676	0.114718	-0.0468556	0.0197464	-0.234931	-0.267972	0.0480868	-0.112266	-0.205768
REACTOME_SIGNALLING_TO_ERKS	-0.234167	0.0181995	-0.325799	-0.272381	0.254218	-0.160588	-0.368664	0.0778172	-0.31055	-0.134428	0.0366571	-0.00974254	-0.279601	0.000229164	0.316182	-0.20299	-0.21464	0.0132722	-0.271216	-0.371428	-0.346671	-0.088631	0.259488	-0.0593074	-0.330139	0.0686397	-0.30675	-0.348393	-0.283283	-0.23248	0.0154297	-0.103232	-0.127929	-0.0153193	-0.0558964	-0.0427938	0.0885883	-0.0850577	0.240056	-0.121649	0.0435169	0.267758	0.248918	0.0728196	0.185807	-0.432153	-0.433677	0.0471994	-0.350545
REACTOME_METABOLISM_OF_PORPHYRINS	-0.375539	-0.334515	-0.11776	-0.399956	0.008511	-0.00439043	-0.00977836	-0.0666574	-0.239256	0.18501	0.360254	-0.182579	-0.303979	-0.174654	-0.250925	-0.628844	0.338522	0.200968	0.215185	-0.0932662	-0.00546725	-0.0013448	-0.136741	-0.261067	-0.0796721	-0.126367	0.270894	-0.0061875	0.307419	-0.240492	0.0168482	-0.323333	-0.543195	-0.0279286	-0.464976	-0.20211	-0.182209	0.137679	0.259228	-0.378489	0.15864	-0.331981	-0.11798	-0.230748	-0.216927	-0.53085	-0.283732	-0.376955	-0.15493
REACTOME_SIGNALING_BY_FGFR	-0.0972586	0.255131	0.0675477	0.0511051	0.268106	0.465309	0.183157	0.206654	0.241351	0.0346679	-0.0231548	0.286977	0.383632	0.178637	0.47841	0.144188	0.26784	0.100686	0.339692	0.0227638	0.105108	0.350695	0.471022	0.336014	0.282403	0.149116	0.154364	0.328366	0.087128	0.337819	0.119635	0.321925	0.217053	0.130884	0.102037	0.40079	0.236672	0.248245	0.300636	0.309422	0.436116	0.208877	0.424159	0.376123	0.0219245	0.0177402	0.132729	0.191791	0.108504
REACTOME_GAP_JUNCTION_ASSEMBLY	0.618981	0.445666	-0.54057	0.351221	-0.577476	-0.13617	0.268826	0.395757	-0.318325	-0.470554	-0.435584	0.410706	-0.185364	-0.466232	-0.438588	-0.33714	-0.499825	0.162098	-0.53771	0.342936	0.388769	-0.0410039	0.0637825	-0.335299	0.528909	-0.0394433	-0.0094198	-0.131453	0.543794	-0.155763	-0.355099	-0.024061	-0.636657	0.121147	-0.212902	-0.475085	-0.167541	-0.507448	0.381148	0.329197	-0.214604	-0.0284904	-0.146586	0.1636	0.412971	-0.212161	-0.493802	0.298048	-0.0554066
REACTOME_TRANSPORT_OF_CONNEXONS_TO_THE_PLASMA_MEMBRANE	0.618981	0.445666	-0.54057	0.351221	-0.577476	-0.13617	0.268826	0.395757	-0.318325	-0.470554	-0.435584	0.410706	-0.185364	-0.466232	-0.438588	-0.33714	-0.499825	0.162098	-0.53771	0.342936	0.388769	-0.0410039	0.0637825	-0.335299	0.528909	-0.0394433	-0.0094198	-0.131453	0.543794	-0.155763	-0.355099	-0.024061	-0.636657	0.121147	-0.212902	-0.475085	-0.167541	-0.507448	0.381148	0.329197	-0.214604	-0.0284904	-0.146586	0.1636	0.412971	-0.212161	-0.493802	0.298048	-0.0554066
REACTOME_GAP_JUNCTION_DEGRADATION	0.434891	0.248522	0.116772	0.255666	0.00974499	-0.157734	-0.160616	0.282968	0.209106	0.593145	0.0369524	0.0584272	-0.261331	0.0329748	-0.327154	-0.0176974	0.232	-0.0698814	-0.304953	0.210462	-0.266068	-0.509063	-0.15932	-0.662368	0.111902	-0.111028	-0.20609	-0.318473	0.0608402	-0.211916	-0.230406	0.306518	0.225335	-0.431718	0.214505	0.0253092	0.363444	0.0616556	0.00926749	-0.0861896	-0.0792215	0.513802	0.0694041	-0.270235	0.0780512	0.29674	-0.0510537	0.0161764	-0.394597
REACTOME_PRE_NOTCH_EXPRESSION_AND_PROCESSING	0.297518	-0.339987	-0.292538	-0.327982	0.12206	-0.407053	0.079251	-0.342672	-0.389749	-0.0881958	0.450372	-0.466456	-0.2265	-0.30624	-0.309938	-0.0890347	-0.0922956	-0.164028	0.0433956	-0.359591	-0.222386	0.124154	-0.280198	-0.30503	0.0776851	0.211394	-0.156738	-0.132864	-0.444868	0.143232	-0.109864	0.0332497	0.364771	-0.233157	-0.194665	0.158437	-0.12429	-0.0641426	-0.340463	0.062157	-0.140783	-0.233983	-0.243848	0.182983	-0.0453203	-0.585936	0.147839	-0.307665	-0.0700796
REACTOME_CHOLESTEROL_BIOSYNTHESIS	-0.147437	0.0392412	-0.232884	-0.0722781	-0.230791	-0.0317004	-0.313065	-0.144549	-0.276551	0.00628419	-0.100505	0.328126	0.0040839	0.297868	-0.303277	-0.064592	-0.0841874	-0.276054	-0.176545	0.314557	0.0158722	0.357029	-0.447892	0.0531366	-0.394099	-0.213325	-0.316042	-0.0603282	-0.548508	0.149951	-0.1282	0.0986617	-0.0238598	-0.282615	-0.191078	0.423233	0.110584	-0.058982	0.114031	-0.0287902	-0.267647	0.396711	0.00103589	-0.156102	0.161508	0.0652441	0.0678883	0.0302837	-0.270435
REACTOME_SNRNP_ASSEMBLY	0.051832	0.0194001	0.269872	0.102234	0.210208	0.0496174	0.0940891	0.204539	0.0924625	-0.00176364	0.0595313	-0.103267	0.0491635	-0.083329	-0.0159366	-0.0793643	0.172383	-0.0157334	0.243892	-0.0129085	0.124655	0.00267952	0.117605	0.0152847	0.0798521	0.045784	0.0020272	0.134071	-0.163455	0.0369021	-0.152223	0.165112	-0.0382618	-0.0280018	0.193768	-0.00871365	0.105268	0.106449	-0.0302716	-0.103438	0.102313	-0.166116	0.0501461	-0.111001	0.0998071	-0.10695	0.041667	-0.138494	-0.143303
REACTOME_SYNTHESIS_OF_BILE_ACIDS_AND_BILE_SALTS	-0.438991	-0.0324616	0.105496	-0.130583	-0.198918	-0.282555	-0.186117	-0.248897	-0.247753	-0.302333	-0.398618	-0.421343	-0.157282	-0.00285693	-0.000121212	-0.177112	-0.241471	-0.203666	-0.115432	-0.241059	-0.0627845	-0.234279	-0.0986742	-0.208407	-0.231913	-0.0890114	-0.0757456	-0.0507392	-0.188852	-0.0703121	-0.329634	-0.137259	-0.31618	0.0324389	0.124545	-0.319953	-0.193283	-0.409982	-0.37361	-0.278649	0.0415349	-0.213146	-0.154216	-0.39081	-0.420875	-0.327663	-0.341384	-0.406898	-0.501435
REACTOME_SYNTHESIS_OF_BILE_ACIDS_AND_BILE_SALTS_VIA_7ALPHA_HYDROXYCHOLESTEROL	-0.451666	-0.0303287	0.116071	-0.135952	-0.207703	-0.291188	-0.190514	-0.299694	-0.28131	-0.324398	-0.409322	-0.416459	-0.179796	-0.00161275	-0.00926899	-0.154472	-0.245924	-0.230147	-0.119748	-0.271258	-0.0755558	-0.244354	-0.279676	-0.216028	-0.296628	-0.0753899	-0.107397	-0.167248	-0.189875	-0.0720979	-0.334415	-0.155188	-0.356224	0.034843	0.0351695	-0.352118	-0.272934	-0.434589	-0.394751	-0.377221	0.0326088	-0.221935	-0.163477	-0.45711	-0.435502	-0.415434	-0.38862	-0.442965	-0.542759
REACTOME_P75NTR_SIGNALS_VIA_NF_KB	-0.538455	0.492252	-0.138589	0.538861	0.60112	0.676583	0.639125	0.606603	0.064688	-0.536355	-0.467763	-0.305872	0.31686	-0.408757	-0.0218798	-0.623101	0.208923	-0.589876	0.527715	0.236089	-0.362684	0.688043	0.646477	0.594982	0.214612	-0.697146	0.179033	0.568881	0.3531	0.554775	-0.440933	0.272229	-0.570802	0.224734	-0.492539	0.11847	0.204023	0.477172	0.414245	0.534621	0.64934	0.275232	0.657123	0.396372	-0.536733	-0.448097	0.0877063	-0.115685	-0.629465
REACTOME_NRAGE_SIGNALS_DEATH_THROUGH_JNK	-0.328509	0.234227	-0.197147	0.080027	0.121602	0.00690896	-0.0261069	0.00416476	-0.13393	0.101246	0.132189	0.27525	0.241171	0.274568	0.174667	0.0394724	0.153157	0.143769	0.162593	0.0248589	0.261715	0.438109	0.243356	0.257528	0.058492	0.227052	0.0779356	0.487109	0.215073	0.220602	0.124886	0.136901	0.150584	0.14242	0.112066	-0.045608	0.0634315	-0.0153505	0.0587552	0.271843	0.122027	0.0924798	0.389906	-0.0113559	0.074693	0.373676	-0.0108439	0.283135	0.310319
REACTOME_P75_NTR_RECEPTOR_MEDIATED_SIGNALLING	-0.275406	0.146473	-0.0699606	0.026792	0.379344	0.306079	0.3126	0.255338	-0.0649396	-0.106056	0.00427081	0.0390501	0.290551	0.130876	-0.0267859	-0.167164	0.196167	-0.182918	0.0605789	0.119234	0.0712421	0.45002	0.27045	0.16462	-0.0520405	-0.0639601	-0.0539653	0.367865	0.322208	0.246292	-0.0817641	0.234574	0.000143946	0.0928601	0.0591795	0.13962	0.0451604	0.0465338	0.193858	0.303395	0.219588	0.117028	0.374771	0.177864	-0.137651	0.0690808	0.113976	0.196849	-0.025669
REACTOME_BILE_ACID_AND_BILE_SALT_METABOLISM	-0.439308	-0.121651	0.00903317	-0.212173	-0.0922961	-0.156982	-0.123641	-0.204515	-0.135705	-0.28846	-0.425584	-0.299319	0.0911084	0.159778	0.00744312	-0.0756091	-0.116572	-0.124855	0.0149653	-0.0834704	0.00237432	-0.178463	0.16335	-0.0836804	-0.258909	-0.00339673	-0.0215772	-0.0395809	-0.175331	0.113937	-0.157801	-0.0573686	-0.194185	-0.00121989	0.223958	-0.148045	-0.0743603	-0.272466	-0.139585	-0.0642466	0.166594	-0.115684	0.0449879	-0.296113	-0.277717	-0.28623	-0.168972	-0.278282	-0.353879
REACTOME_SIGNALING_BY_VEGF	-0.105535	0.100042	0.0554682	0.0705514	0.0718609	-0.0771319	-0.184059	0.09977	-0.0265311	0.101007	-0.0835352	0.175541	-0.0604507	0.0244141	-0.0880051	0.0161727	-0.00632918	-0.0620997	0.0877935	0.0365696	0.0227229	0.14341	-0.0779288	-0.119905	-0.0539589	-0.0909806	-0.087115	-0.0317422	0.0899802	-0.0382132	-0.116927	0.0832451	0.090009	0.0745661	0.175185	0.0312768	-0.0378835	-0.0560336	0.0238056	0.00715524	-0.0252743	0.0731549	-0.01514	-0.145722	-0.130847	-0.0737024	-0.119095	0.00567828	0.0752473
REACTOME_SIGNALING_BY_RHO_GTPASES	0.156734	-0.0494141	-0.131238	-0.0204101	-0.0113065	-0.253543	-0.123995	-0.052898	-0.113416	-0.110763	0.0535966	-0.107134	0.0121942	-0.139493	-0.144303	-0.0603358	-0.134139	-0.0602404	-0.0130835	-0.190105	-0.0315507	-0.0282484	-0.142908	-0.266358	0.0502559	-0.138664	-0.223931	-0.0568832	-0.0842755	-0.0924147	-0.107003	0.0346721	0.0636831	-0.13428	0.00201852	-0.0184231	0.0715229	-0.0347777	-0.00522912	0.147762	-0.138906	0.00616297	-0.0597334	0.0693152	0.0731345	-0.213761	0.035971	0.0416362	0.00054633
REACTOME_RHO_GTPASE_CYCLE	-0.207905	0.181195	-0.0597454	0.0011321	0.303481	-0.0688138	0.0451575	0.0992286	0.0412062	0.244836	0.19734	-0.0842269	0.233124	0.100144	-0.0460027	-0.0613443	-0.0827997	-0.0555909	0.139746	-0.160191	0.217994	0.100515	0.163874	-0.0832716	0.11565	-0.0476613	0.0723616	0.186671	-0.0589975	0.0438607	0.00644784	0.120433	-0.164009	-0.000868084	0.152354	-0.0303634	0.222981	0.134969	-0.0191642	0.332928	0.0960036	0.0687501	0.38083	0.266137	-0.0398299	0.183563	0.102386	0.254142	0.171143
REACTOME_DEGRADATION_OF_BETA_CATENIN_BY_THE_DESTRUCTION_COMPLEX	-0.299019	-0.141796	-0.28486	-0.0824718	0.0633334	-0.0997148	-0.00924391	-0.0123354	-0.132724	-0.243351	-0.163839	0.0785365	0.0513186	-0.0356574	0.443031	-0.0306587	0.295975	-0.046715	0.105387	0.127925	-0.0752225	0.370359	0.172338	0.143034	0.167586	-0.0497668	0.160354	0.449075	0.100913	-0.0366467	-0.0133285	0.172128	-0.14799	0.129934	0.0315553	-0.062887	0.10116	0.148096	0.0361832	0.122774	0.330872	0.137232	0.0332626	0.0264969	-0.0304653	-0.133616	0.172056	0.00752554	-0.0445418
REACTOME_RHO_GTPASE_EFFECTORS	0.195156	-0.0914452	-0.126127	-0.0189347	-0.0461543	-0.266184	-0.118822	-0.0452491	-0.139647	-0.187978	0.0179166	-0.109458	-0.0345325	-0.154637	-0.156141	-0.0994411	-0.131691	-0.0651783	-0.0394389	-0.191542	-0.0796949	-0.0619707	-0.180353	-0.278213	0.0528493	-0.149563	-0.276742	-0.097463	-0.0905371	-0.10745	-0.125641	0.0399437	0.100951	-0.147431	0.00180941	-0.0200621	0.0300152	-0.0509696	0.0105064	0.105764	-0.182531	-0.00698442	-0.146375	0.00348212	0.0959785	-0.290365	0.000616738	-0.0139108	-0.0135878
REACTOME_SIGNALING_BY_WNT	-0.00783135	-0.165693	-0.215728	-0.188726	0.0900391	-0.191241	0.0241308	-0.130428	-0.147733	-0.0669895	0.169952	-0.146283	0.00726557	-0.0899104	0.140117	-0.00798455	0.232104	-0.0259856	0.0605319	-0.0217211	-0.065194	0.244149	0.0235281	0.00153024	0.207319	-0.0387814	0.0546371	0.169055	-0.114235	-0.0387525	0.107472	0.0944205	0.104637	-0.125471	-0.0158897	0.0312459	0.0348699	0.104296	-0.0638258	0.100441	0.199372	0.139743	-0.0787469	0.115237	0.0021614	-0.286763	0.0986615	-0.116934	-0.0273466
REACTOME_COBALAMIN_CBL_VITAMIN_B12_TRANSPORT_AND_METABOLISM	-0.686367	0.304282	0.197528	-0.26487	-0.195579	-0.142206	-0.0311516	-0.3858	0.0354389	-0.250931	-0.0797181	-0.284898	0.125357	0.357236	-0.477135	-0.315377	-0.551126	-0.00456651	0.341022	-0.344026	0.00660669	-0.00923176	0.0442445	-0.0299118	-0.62052	-0.145902	0.227979	-0.338973	-0.12519	-0.407418	-0.0989587	-0.355237	-0.0750962	-0.270338	-0.189935	-0.261349	-0.0148395	-0.246052	-0.0647862	-0.541125	-0.608535	-0.452129	-0.385627	-0.487709	-0.582064	0.452995	-0.244786	0.306638	-0.05452
REACTOME_NICOTINATE_METABOLISM	-0.196692	-0.00990302	0.407945	0.0779014	0.00689053	0.0938511	-0.0501038	0.0612562	-0.149187	0.207987	0.114776	-0.238609	0.0286668	-0.254836	0.303884	-0.167016	0.170003	0.236081	0.243222	0.333415	-0.045333	-0.0227929	-0.296316	-0.0643129	0.0942549	-0.0355623	-0.0379488	-0.27181	-0.177254	-0.214268	0.197188	-0.0818652	-0.213431	0.120563	0.0659586	-0.190989	0.177811	-0.187995	0.0210416	-0.0106435	-0.0516185	0.00306648	-0.180497	-0.177348	-0.128993	0.381481	-0.112338	-0.422943	-0.042004
REACTOME_METABOLISM_OF_WATER_SOLUBLE_VITAMINS_AND_COFACTORS	-0.00919012	0.159911	0.171679	0.238791	0.00184239	0.314553	0.205874	0.110311	0.17473	0.0846409	-0.00404191	-0.0491976	-0.136673	-0.113717	0.0272465	-0.270641	0.0598359	-0.0341571	-0.00563757	0.0710953	-0.10893	-0.0764389	-0.167324	0.0583253	-0.182476	-0.150715	-0.000688501	-0.2375	-0.241584	-0.158664	-0.161232	-0.22972	-0.119203	-0.303101	-0.142072	-0.0816143	0.0209507	-0.308966	-0.118538	-0.194024	-0.247554	-0.180291	-0.167941	-0.333961	-0.312824	0.089462	-0.2263	-0.347155	-0.109189
REACTOME_METABOLISM_OF_VITAMINS_AND_COFACTORS	-0.172638	0.189452	0.111694	0.170127	-0.155082	0.116802	0.136777	-0.0776804	0.0694869	-0.0132525	-0.104112	0.011524	-0.183999	-0.159839	-0.0309591	-0.217846	0.140099	0.0158417	-0.122461	-0.0322542	-0.129907	-0.217695	-0.152258	0.150261	-0.290091	-0.16213	0.0524611	-0.317679	-0.050335	-0.199141	-0.149985	-0.101225	-0.0982804	-0.283962	-0.0890931	-0.142428	0.00373068	-0.182692	-0.0479693	-0.18704	-0.242749	-0.189698	-0.128468	-0.20157	-0.0245009	-0.00670887	-0.116742	-0.28149	-0.202733
REACTOME_A_TETRASACCHARIDE_LINKER_SEQUENCE_IS_REQUIRED_FOR_GAG_SYNTHESIS	-0.391655	-0.332351	-0.244342	-0.39173	-0.0786781	-0.112952	-0.258455	0.117675	-0.238714	-0.293952	-0.0466226	-0.246531	-0.134736	-0.18175	0.073814	0.255862	-0.365889	-0.0988195	0.0574093	-0.218674	-0.162072	-0.0220853	0.174854	0.159791	0.213049	-0.0140566	-0.236951	-0.21388	0.0564108	-0.0625846	0.246277	0.179229	-0.223734	-0.124095	-0.0487984	-0.250973	-0.130885	-0.171572	-0.039511	-0.147602	-0.108428	-0.0553246	0.170429	0.0327464	-0.0856497	-0.167703	-0.232591	0.00576782	-0.365485
REACTOME_NICOTINAMIDE_SALVAGING	-0.216621	-0.219553	0.18686	-0.246538	-0.0827437	-0.357913	-0.397364	-0.295742	-0.593246	0.0658608	-0.0916898	-0.525968	-0.230347	-0.424651	0.1687	-0.349348	0.169664	0.26575	0.224279	0.20915	-0.508238	-0.0208558	-0.38614	-0.421574	-0.135634	-0.196195	-0.124428	-0.446946	-0.307683	-0.593174	0.0620961	-0.355296	-0.526441	0.0147828	-0.296693	-0.526459	-0.161464	-0.459545	-0.00800871	-0.169559	-0.259507	-0.185851	-0.295707	-0.0791711	-0.464823	-0.0371523	-0.251956	-0.581104	-0.563704
REACTOME_SIGNALING_BY_NOTCH1	-0.469944	-0.263746	-0.406171	-0.134635	0.0883562	0.0807729	0.133126	0.131804	-0.0976352	-0.393186	-0.306206	0.0337025	0.291743	-0.118392	0.11369	-0.0692454	0.36339	-0.229481	0.0300032	0.174987	-0.413023	0.263252	0.419301	0.222755	-0.00226013	-0.381654	-0.123083	0.438802	0.132055	0.31401	-0.254047	-0.295515	-0.0215604	0.202175	-0.151742	0.336169	0.172602	0.130569	0.0762664	0.237716	0.394602	-0.0859263	0.298893	0.0455846	-0.315143	-0.277627	0.128561	-0.241454	-0.353355
REACTOME_NUCLEAR_EVENTS_KINASE_AND_TRANSCRIPTION_FACTOR_ACTIVATION_	0.0854539	0.129026	0.045492	-0.42434	-0.167949	0.0699617	-0.0189237	-0.11196	-0.102764	-0.276022	0.108946	-0.172114	0.124853	-0.0140802	0.309936	0.000668691	-0.0714265	0.0151791	-0.0727916	-0.0518251	0.115586	-0.09941	0.150201	0.134305	-0.217394	0.207453	-0.0601587	-0.0996053	-0.390034	0.029961	-0.234618	-0.0441679	-0.20731	-0.227464	0.123089	-0.0691636	0.0200749	-0.0652791	-0.0356968	0.143854	-0.0914426	0.181227	0.300151	0.394211	-0.131362	-0.182339	-0.258814	0.24332	-0.256018
REACTOME_ERK_MAPK_TARGETS	0.0203392	-0.249262	-0.219602	-0.593385	-0.20323	-0.166849	-0.233905	-0.394998	-0.353243	-0.368525	0.304255	0.00933297	0.152478	0.351851	0.404145	0.0759943	-0.0874513	0.0715563	0.0845998	-0.200582	0.0109037	-0.0632652	0.0999933	0.339542	-0.0874944	0.344172	-0.0657416	-0.000509588	-0.344733	0.138853	-0.0381978	0.0257834	-0.0726858	-0.35638	0.203095	0.138354	0.13797	0.0493392	-0.137028	0.143662	-0.275115	0.450962	0.338493	0.617559	0.0759147	-0.133196	-0.177933	0.498037	-0.139599
REACTOME_IMMUNOREGULATORY_INTERACTIONS_BETWEEN_A_LYMPHOID_AND_A_NON_LYMPHOID_CELL	-0.0793138	0.020078	0.287067	0.2789	-0.129734	0.287856	0.173776	0.246911	0.132636	-0.395978	-0.271677	0.306253	0.349974	-0.0432385	0.117473	0.14476	0.00431499	0.0628973	0.117506	0.215291	0.0916881	-0.261486	-0.175254	-0.0374625	-0.259474	-0.153279	-0.0484871	-0.244511	-0.0682389	0.099123	0.27301	0.0872517	-0.00827597	-0.261036	-0.263175	0.181046	-0.266673	-0.285795	0.146088	-0.154354	-0.181024	0.212026	-0.225612	-0.242797	-0.224241	-0.0107941	-0.121087	-0.0902672	-0.0747348
REACTOME_VITAMIN_B5_PANTOTHENATE_METABOLISM	0.0967779	0.237174	0.00485639	0.604208	0.0385914	0.272519	0.312667	0.410942	-0.100016	-0.370129	-0.357502	0.281529	-0.35418	-0.111541	0.0391933	-0.472149	0.00952082	-0.197119	0.339754	-0.210733	-0.0248131	0.216622	-0.271354	0.135422	0.0374501	-0.178209	0.0285999	-0.0378578	-0.155107	0.145834	-0.280859	-0.0888914	-0.0138617	-0.316736	-0.267036	-0.226593	-0.0448034	0.00335888	0.1453	-0.133262	0.034293	-0.535861	-0.116739	-0.246048	-0.168843	0.0360853	-0.322232	-0.512965	-0.259828
REACTOME_NEGATIVE_REGULATION_OF_THE_PI3K_AKT_NETWORK	-0.389924	-0.00612728	-0.119763	-0.107565	0.0547407	0.117306	0.0642378	0.00620939	0.100062	0.0975317	-0.0549336	0.0877665	0.0185235	0.352831	0.348202	0.0831812	0.248058	0.0537994	0.178021	-0.0179903	0.0798197	0.180145	0.207053	0.0870101	0.130417	0.243686	0.205634	0.279002	-0.101154	0.201996	-0.0156907	0.176745	0.172434	0.135659	0.307709	0.0617065	-0.134163	0.0239674	0.066624	0.0573781	0.148452	0.0873061	0.141997	0.0615056	-0.111927	-0.0162557	0.0758695	0.274767	0.15817
REACTOME_ER_TO_GOLGI_ANTEROGRADE_TRANSPORT	0.10782	0.0630774	-0.141751	-0.00956382	-0.0661184	-0.150213	-0.0845874	-0.0177374	-0.151628	-0.293298	-0.284065	0.0432435	-0.114208	-0.193115	-0.110793	-0.119442	-0.169206	-0.0246997	-0.139897	0.0570487	0.0590771	-0.0327121	0.0690295	-0.187357	0.0932786	-0.21125	-0.103018	-0.0630266	0.0862581	-0.0316378	-0.126477	-0.046661	-0.123781	-0.010353	-0.0574928	-0.130603	0.0472537	-0.231876	0.0793468	-0.125868	-0.119429	-0.145517	-0.00318566	-0.113159	-0.0634036	-0.070317	0.00353833	-0.0450194	0.0466185
REACTOME_MEMBRANE_TRAFFICKING	0.11345	0.100557	0.0572711	0.0513364	0.0274347	0.0106187	0.0428707	0.0888046	0.0369827	-0.0397244	-0.0132485	0.0122015	-0.0834494	-0.0790338	-0.0634541	-0.0404779	-0.0935758	-0.00923343	-0.0269307	0.0436641	-0.0187008	-0.0259161	0.0580357	-0.0954116	0.00568112	-0.115069	-0.118583	-0.0179279	-0.0172878	-0.0445422	-0.147033	0.00340774	-0.087034	-0.0733467	-0.12533	-0.066754	0.0284094	-0.0952275	0.0257738	-0.00850714	-0.0501238	0.0570372	0.0419069	-0.0240593	-0.0298893	-0.0524437	0.0297968	0.0285058	-0.0243585
REACTOME_TRANS_GOLGI_NETWORK_VESICLE_BUDDING	0.254332	0.107097	-0.0995154	0.0983459	0.073598	0.0353027	0.189916	-0.0381591	0.226403	0.216899	-0.0566056	-0.0209816	-0.0505611	0.038548	-0.0123157	-0.0464448	-0.165067	-0.124536	-0.0596116	-0.0864075	-0.138089	-0.00617008	0.00858082	-0.213082	0.162561	0.0750203	-0.171102	0.0337881	-0.103572	-0.00737679	-0.286699	-0.140525	-0.148705	0.0637056	-0.124863	0.0156768	0.189582	0.0624714	-0.13184	0.0628678	0.29623	0.202317	0.157742	0.104078	-0.00770188	-0.0973376	0.149535	0.0929439	-0.101563
REACTOME_TCF_DEPENDENT_SIGNALING_IN_RESPONSE_TO_WNT	-0.0581194	-0.239322	-0.234874	-0.180963	0.0390391	-0.205108	0.0201632	-0.17275	-0.157156	-0.143127	0.0923551	-0.165479	0.0110871	-0.121056	0.193256	0.0827475	0.25028	0.00532441	0.158486	-0.0454922	-0.0434802	0.379113	-0.0230465	0.0300213	0.243093	0.0131249	0.0569616	0.148638	-0.111175	-0.0191142	0.0857683	0.172219	0.155116	-0.0674415	-0.0197339	0.0735167	0.0986437	0.18975	-0.124828	0.169052	0.155237	0.113235	-0.137006	0.181218	0.0599979	-0.361598	0.162092	-0.129372	-0.0475615
REACTOME_FORMATION_OF_THE_BETA_CATENIN_TCF_TRANSACTIVATING_COMPLEX	0.308179	-0.382319	-0.257312	-0.275689	0.0679827	-0.243984	0.21475	-0.25192	-0.205776	-0.133924	0.426214	-0.367432	0.0993547	-0.213907	-0.158023	0.30398	0.209746	0.108668	0.377986	-0.325749	-0.13052	0.352176	-0.242418	0.0102542	0.282598	0.259096	0.0488389	-0.0930949	-0.4159	0.262229	0.0260421	0.0175995	0.447017	-0.0759158	-0.122025	0.262218	0.0573144	0.203534	-0.318874	0.230631	0.0202609	-0.0803308	-0.25617	0.292922	0.325659	-0.5635	0.226263	-0.390814	-0.00460954
REACTOME_G_PROTEIN_ACTIVATION	-0.500345	-0.0826736	-0.551786	-0.443443	0.107426	-0.362709	-0.343761	-0.290202	-0.414305	-0.153908	-0.243216	0.00843454	0.179307	-0.326867	0.447729	0.0592965	0.36542	0.507414	-0.145297	0.512649	0.0976311	0.302195	0.10562	-0.289227	-0.00627295	-0.127201	-0.249229	0.668387	-0.13608	-0.147353	-0.0409322	-0.400418	0.153873	-0.245068	0.296047	-0.120285	-0.089599	0.0307959	-0.159454	0.224324	0.186171	-0.0274163	0.427464	0.422689	-0.071132	0.175794	0.555926	0.375807	-0.0320779
REACTOME_METABOLISM_OF_NITRIC_OXIDE_NOS3_ACTIVATION_AND_REGULATION	-0.113596	0.117553	-0.308564	-0.318215	-0.324999	0.147132	-0.548212	-0.0179441	-0.382924	-0.222389	0.107699	-0.263805	-0.0991273	0.0147412	0.152251	-0.116353	0.143598	-0.0527615	-0.0355568	0.174595	-0.0472978	0.119597	0.0103469	-0.192655	0.109923	0.0145148	-0.205524	0.0810714	-0.0811691	-0.0884773	-0.0895669	0.287896	-0.175504	0.46626	-0.0677097	-0.0130776	0.127217	0.273688	0.617599	0.275593	0.448706	0.0785459	0.134966	0.112103	0.179056	-0.140824	0.201436	0.254421	-0.135978
REACTOME_ASSEMBLY_OF_COLLAGEN_FIBRILS_AND_OTHER_MULTIMERIC_STRUCTURES	-0.0502591	-0.0974883	-0.0720731	-0.0285984	-0.158365	-0.0980176	0.0693828	0.123238	-0.0840493	0.276131	-0.257257	-0.124571	-0.0986725	-0.0180717	0.177734	0.0816279	-0.121779	-0.0400122	-0.0915	0.000781481	-0.231165	-0.302018	0.0133487	-0.369537	-0.331188	-0.0390107	-0.0804327	-0.323215	-0.345841	-0.0378505	0.227836	-0.338559	0.0546366	-0.318868	-0.108488	-0.0936742	-0.0866599	-0.0331811	-0.230298	-0.301243	-0.334278	-0.234496	-0.199494	-0.0906755	-0.0945355	-0.202831	-0.0199624	-0.313624	0.102933
REACTOME_METABOLISM_OF_ANGIOTENSINOGEN_TO_ANGIOTENSINS	0.0889505	-0.0813648	0.341706	0.195451	-0.193693	0.0175409	0.368699	-0.0833481	-0.277457	0.230403	-0.406796	0.120532	-0.210674	-0.143551	0.604776	0.418915	0.174553	0.463615	0.0277125	-0.0158093	-0.0594073	-0.387399	-0.296773	-0.0488489	0.188972	0.0921116	0.244369	-0.201338	0.0992836	-0.0897192	0.0205177	0.468903	0.530872	0.114873	-0.190493	-0.0326356	0.481264	-0.0535001	0.0124364	-0.161345	-0.114924	0.136737	-0.420881	-0.0525043	0.0409175	-0.151716	0.30232	-0.0916797	0.275854
REACTOME_KERATAN_SULFATE_BIOSYNTHESIS	-0.272964	0.223777	0.0978817	0.273979	-0.359608	-0.314222	0.20108	0.0053604	0.0607656	-0.0207566	-0.184569	-0.0931711	-0.0421153	-0.133827	-0.174923	-0.117957	-0.128197	-0.000686339	-0.378944	-0.171956	-0.104816	-0.270538	-0.24798	0.0380728	-0.194324	-0.46392	-0.224219	-0.33318	0.140999	-0.197738	-0.103741	-0.201263	-0.403954	-0.0584665	0.0619604	-0.218646	-0.2067	-0.130167	0.190426	-0.260139	-0.432178	-0.354706	-0.141979	-0.189432	0.113664	-0.425782	-0.143661	-0.169494	-0.497441
REACTOME_KERATAN_SULFATE_DEGRADATION	-0.128264	0.17023	0.224058	0.35487	0.0369979	0.0883705	0.306282	0.0290775	-0.0938713	0.32218	0.00704244	-0.204256	0.252337	0.462213	-0.356506	0.040518	0.217173	0.185575	-0.176373	-0.0545469	0.232176	0.249281	-0.0616744	0.350934	0.0500602	-0.0836064	0.358345	-0.179586	0.246255	-0.0204908	-0.0358571	-0.260567	-0.163162	0.225811	0.377672	0.0504956	0.467926	0.243584	0.482423	0.119725	-0.209117	-0.327394	0.0489682	0.131341	0.174335	0.0152236	0.027491	-0.00459524	-0.0936422
REACTOME_HS_GAG_BIOSYNTHESIS	-0.506215	-0.446672	-0.0751512	-0.305146	-0.243912	-0.19772	-0.21237	-0.0425402	0.0305153	-0.404333	-0.269216	0.439249	0.322168	0.532131	0.289343	0.398514	-0.0083002	-0.111662	0.202373	0.281773	0.377696	0.143237	0.457015	0.298376	0.20873	0.439103	-0.0134417	0.297091	0.439113	0.327268	0.268129	0.524163	0.313992	0.334625	0.105974	-0.0181711	0.0641434	0.406295	0.219653	0.295043	0.425238	0.338014	0.391033	0.511986	0.408937	0.385845	0.397357	0.434069	-0.0429058
REACTOME_TCR_SIGNALING	-0.247739	0.0517441	-0.191514	0.0744344	0.0941988	-0.00664478	0.0708046	0.127068	-0.0594433	-0.0885353	-0.125543	0.109494	-0.0991405	-0.121214	0.319675	-0.0762009	0.189078	-0.0891237	-0.0276871	0.0821782	-0.123379	0.305603	0.0776293	0.0989833	0.112487	-0.143339	-0.0316138	0.239996	0.0864057	-0.199254	0.0286079	0.202981	-0.154396	0.153466	0.0320961	-0.0945223	0.0127773	0.0175719	-0.0781785	0.00320217	0.204758	0.11945	0.0616838	0.0421371	-0.103481	-0.0486886	-0.0033425	-0.0112937	-0.0955087
REACTOME_HS_GAG_DEGRADATION	-0.262651	-0.353289	-0.175811	-0.370543	-0.136399	-0.160748	0.100065	-0.0506173	0.174924	-0.27107	-0.143413	0.233216	0.0627943	0.519038	0.0506298	0.232139	-0.158345	-0.082345	0.135168	0.158825	0.0698091	0.0567891	0.261079	0.0579854	-0.0671996	0.413702	0.268106	0.0359794	0.194316	0.200078	-0.0290457	0.185077	0.304355	0.226177	0.127691	-0.0335585	0.250962	0.147702	0.245628	0.202578	0.247984	0.0150889	0.171357	0.201149	0.399184	0.312893	0.343457	0.310048	-0.243254
REACTOME_CS_DS_DEGRADATION	-0.388963	-0.179207	-0.240609	-0.00281796	0.197339	-0.163994	-0.270291	0.0240595	-0.466285	0.0978438	0.115944	-0.499485	-0.253345	-0.49778	-0.269627	-0.152043	-0.26	0.111946	-0.0558467	-0.444702	-0.211059	0.00303995	-0.0417712	0.222838	0.0326113	-0.356121	0.361989	-0.335343	-0.102189	-0.121931	0.162474	0.398958	-0.517421	-0.375444	0.0639623	-0.255383	0.296074	-0.254683	0.267047	-0.0233017	-0.365211	-0.0732596	-0.259942	-0.309208	-0.111317	-0.123531	-0.318188	-0.341618	-0.294331
REACTOME_GENERATION_OF_SECOND_MESSENGER_MOLECULES	-0.0843611	0.0508875	0.0425808	0.282225	-0.0640677	-0.146966	0.0336188	0.207709	-0.220961	-0.233138	-0.192483	-0.041181	0.121509	0.0757419	0.290453	0.109753	0.00304588	0.180096	0.00440455	0.102777	-0.137026	0.29127	0.0165969	0.158465	0.206352	0.172673	-0.0899351	0.207005	-0.299494	-0.124963	-0.228863	0.334978	-0.238535	0.224499	-0.048824	0.126556	-0.111747	0.148926	-0.134178	0.37922	0.225731	0.22803	0.212103	0.0913646	0.223759	0.3424	-0.127793	0.384974	0.456706
REACTOME_CELL_SURFACE_INTERACTIONS_AT_THE_VASCULAR_WALL	-0.0785898	-0.162571	-0.143449	-0.0592451	0.0082348	-0.0897224	-0.232231	-0.0709675	0.0049379	0.0233177	-0.190672	0.00900774	-0.00943485	0.0441125	-0.166097	-0.135649	0.0798373	-0.149959	0.225518	0.112994	-0.172875	-0.122995	0.045431	0.120497	-0.106061	-0.0566741	-0.10447	-0.158317	-0.0556279	-0.0715486	0.166439	-0.150703	-0.121175	-0.190467	-0.0458695	-0.165838	0.0036591	0.00640071	0.051578	0.00327797	0.00550684	-0.0249362	0.0356248	-0.00465802	0.253895	-0.0237856	0.0287072	-0.0304137	-0.159727
REACTOME_SIGNALING_BY_HIPPO	0.249741	-0.174629	0.164463	-0.0581662	0.357707	-0.0754533	-0.222914	0.00907336	-0.261413	-0.0567366	0.170669	-0.0373969	0.0184409	0.0311351	0.228921	-0.154131	-0.196384	-0.372811	-0.482182	-0.450241	-0.237206	0.0777298	-0.119453	-0.332665	-0.291339	-0.293814	-0.224792	-0.235358	-0.152589	-0.0849166	-0.3833	-0.0961364	0.174243	-0.493392	-0.22175	-0.216286	-0.114828	-0.473124	-0.391472	-0.175183	-0.0851403	-0.335915	0.278096	-0.276676	0.0924029	-0.0216621	-0.121533	0.131427	-0.409262
REACTOME_FCGAMMA_RECEPTOR_FCGR_DEPENDENT_PHAGOCYTOSIS	-0.00283176	-0.121794	-0.00468618	0.042211	0.204895	-0.0862249	-0.108642	0.0608981	-0.192423	-0.0276599	-0.062815	-0.00277813	0.118936	-0.0345089	-0.107671	-0.198095	-0.0760932	0.0162583	0.136791	0.0497942	-0.24017	-0.271105	-0.0531935	-0.252456	-0.232402	-0.309379	-0.268123	-0.231279	-0.175339	-0.0654714	-0.045562	0.124342	-0.076963	-0.278467	0.0021157	0.118203	0.130324	0.0744507	0.216975	0.198188	0.00760278	0.0996179	0.0899396	0.0461278	-0.0853613	0.023803	-0.0115487	0.172753	0.205269
REACTOME_FCGR_ACTIVATION	-0.134146	-0.297967	0.175964	-0.10127	0.407071	0.251577	-0.101663	-0.0978213	-0.342669	-0.483841	-0.500645	-0.395446	0.676568	0.34958	-0.253732	-0.499938	-0.127295	-0.409848	0.487366	0.545335	-0.351709	-0.41107	0.331876	-0.501457	-0.616619	-0.619663	-0.331292	-0.567259	-0.597053	0.00365624	0.222714	-0.19782	-0.542645	-0.465009	-0.195731	0.454953	0.337242	0.0659209	0.328132	0.469813	0.230275	0.0772097	0.404081	0.293052	0.167196	0.30665	0.365183	0.277689	0.208188
REACTOME_ROLE_OF_PHOSPHOLIPIDS_IN_PHAGOCYTOSIS	0.251561	0.0725429	0.346586	0.355235	0.358864	0.460516	0.290869	0.321379	0.152032	-0.00130283	-0.0610463	0.0332035	0.36159	0.245532	-0.387656	-0.334228	-0.246525	-0.178865	0.441012	0.536361	-0.217586	-0.244932	0.0731038	-0.16664	-0.354655	-0.439	0.00623772	-0.16951	-0.418657	0.372632	0.217342	-0.136734	-0.238993	-0.355671	-0.235539	0.297828	0.275246	0.0631891	0.268053	0.383815	0.177911	0.296212	0.382142	0.228406	0.0486922	0.402957	0.0516073	0.116188	0.268492
REACTOME_MICRORNA_MIRNA_BIOGENESIS	0.352296	0.0327608	0.210361	-0.03943	0.21664	0.156565	0.30394	0.0819589	0.159705	0.312131	0.237794	-0.166385	-0.229184	-0.421552	-0.142907	-0.453699	-0.171113	-0.226121	-0.288685	0.060539	0.0853512	0.156264	-0.12123	-0.105474	-0.161655	0.2221	-0.316061	-0.277641	-0.510043	-0.280884	-0.367026	-0.0073065	-0.132423	-0.409618	-0.405255	-0.331916	-0.386431	-0.354274	-0.361498	-0.123272	-0.0796031	-0.271468	-0.110356	-0.3356	-0.438544	-0.240288	-0.298959	-0.468108	-0.148951
REACTOME_COPII_MEDIATED_VESICLE_TRANSPORT	-0.0558387	-0.119202	0.152407	-0.111416	0.0702516	-0.191564	-0.141536	-0.274938	-0.0330221	-0.156442	0.0496567	-0.149304	-0.190711	0.136543	0.0349829	-0.00410825	-0.230213	0.0392376	0.0234951	-0.119102	0.00639439	0.167061	0.018462	-0.198403	0.0544048	-0.0544213	-0.0554913	-0.00190669	0.0233978	0.177	-0.0886676	-0.210579	0.200904	-0.0457804	-0.148587	0.0450677	0.0512888	-0.363054	-0.203588	-0.243134	-0.214191	-0.266919	0.0584808	-0.330805	-0.191531	-0.0867701	0.202818	0.0697704	0.0805134
REACTOME_REGULATION_OF_PYRUVATE_DEHYDROGENASE_PDH_COMPLEX	-0.099731	-0.410171	-0.148987	-0.332922	-0.0474271	-0.377359	-0.43103	-0.505684	-0.32831	-0.352093	-0.258756	-0.00780506	-0.100754	0.031345	-0.304183	0.113236	-0.0791047	0.146767	0.0677708	-0.217316	0.0990358	0.196833	0.0496114	0.121573	-0.193786	0.227846	0.267915	0.213816	0.206773	0.168272	-0.353459	-0.165854	-0.0347524	0.233201	0.152335	-0.223461	0.115215	0.376017	-0.304049	0.113078	-0.0317539	-0.065702	-0.356203	-0.294736	-0.163984	-0.0150636	-0.20782	0.084584	-0.278152
REACTOME_CELL_DEATH_SIGNALLING_VIA_NRAGE_NRIF_AND_NADE	-0.399522	0.173862	-0.209788	0.0509342	0.405757	0.37943	0.171619	0.121303	-0.136369	-0.228645	-0.178582	-0.0159408	0.376389	0.168369	0.0770993	-0.178512	0.242874	-0.222081	0.161118	0.110538	0.042258	0.481928	0.313989	0.105534	-0.0330083	-0.0694222	-0.00614054	0.477109	0.303716	0.308802	-0.0550071	0.233775	-0.0648785	0.028007	-0.0750583	0.0861446	0.0706445	0.186514	0.241005	0.341332	0.267806	0.105677	0.49586	0.14732	-0.226857	-0.0233282	0.0630233	0.181892	-0.0965108
REACTOME_PECAM1_INTERACTIONS	0.0397086	-0.0906441	-0.275924	-0.329972	-0.262001	0.0213531	-0.272271	0.152864	0.121444	-0.00650173	-0.262612	-0.274763	0.378005	0.243172	0.142809	0.0786403	0.344096	-0.10353	0.00513796	-0.359089	0.11797	0.190634	0.126071	0.474315	0.0435492	0.245249	0.106727	0.224885	-0.271567	-0.424258	-0.389506	-0.332982	0.386242	0.386774	0.27585	0.106821	-0.0944377	-0.500689	-0.296836	-0.415314	0.250726	-0.23576	-0.198966	0.0433208	0.453537	-0.231221	-0.0649685	0.113074	-0.285831
REACTOME_BASIGIN_INTERACTIONS	-0.16575	0.2213	-0.226985	-0.192533	0.0892768	-0.114989	-0.274596	0.262006	-0.0624278	0.00567835	-0.333117	0.150031	0.287539	0.358119	0.241329	0.29716	0.0935805	0.0337087	0.300824	0.27231	0.100824	0.0247266	0.167237	0.292315	0.44097	-0.174357	0.011948	0.0823858	0.0465457	0.521839	0.367358	-0.0243674	0.309801	0.131312	-0.0773163	0.14086	0.0463523	0.319135	0.114492	0.176536	0.0344811	-0.318637	0.39357	-0.159255	0.279358	0.0621238	0.400231	0.361075	0.202834
REACTOME_GENE_SILENCING_BY_RNA	0.192378	-0.296235	-0.165682	-0.274793	0.236172	-0.233907	0.0410813	-0.110532	-0.0686868	-0.104837	0.367643	-0.332213	-0.0740857	-0.227951	-0.159823	-0.0840432	0.0637689	-0.113539	0.146867	-0.235969	0.0566968	0.255384	-0.114514	-0.0951595	0.211112	0.20224	-0.112568	-0.0958822	-0.336868	0.0535058	-0.0659904	0.0829259	0.394995	-0.132315	0.0414026	0.130627	0.113993	0.0469446	-0.241327	0.129213	-0.0424058	-0.163998	-0.159003	0.167928	0.0125248	-0.380404	0.0548055	-0.264162	-0.0366629
REACTOME_BIOLOGICAL_OXIDATIONS	0.0958619	0.214523	0.036024	-0.0483164	0.107154	0.0165517	-5.51201e-05	-0.0114178	0.0740884	0.119374	-0.0359158	-0.0677562	0.0548714	0.219561	0.278027	0.163758	0.158829	-0.0567932	0.101235	0.0451927	0.0705423	0.105326	0.0065328	-0.0338666	0.242511	0.124612	0.135055	0.216326	0.0157029	0.0511574	-0.0303598	0.0631018	0.0913958	0.281103	-0.0177186	-0.0109863	0.0167347	0.078785	-0.111102	-0.0345158	0.0466986	-0.0304046	0.00919417	-0.0784123	0.133793	0.0643783	0.0768611	-0.0208054	-0.0260063
REACTOME_CYTOCHROME_P450_ARRANGED_BY_SUBSTRATE_TYPE	-0.519977	0.170884	-0.0941011	0.0457368	-0.350396	-0.412825	-0.199597	-0.188204	-0.262445	-0.173684	-0.390564	-0.152421	0.298203	0.163615	0.265587	0.389945	0.278393	0.165342	0.118014	-0.110566	0.206064	0.269358	0.252158	-0.252107	0.305655	0.140923	0.275765	0.330845	0.0684258	0.115413	-0.439006	0.140144	-0.172709	0.174604	0.103864	-0.220564	-0.0332433	0.0327908	0.000212465	0.383176	0.0890655	0.251947	0.142882	0.235645	0.110517	0.330122	0.220287	-0.0710288	0.193054
REACTOME_PHASE_I_FUNCTIONALIZATION_OF_COMPOUNDS	-0.279622	0.204279	-0.0186444	0.0226382	-0.0818862	-0.0880474	-0.0869278	-0.0635227	-0.102799	-0.106339	-0.0711476	-0.160415	0.118272	0.156485	0.259647	0.166627	0.178761	0.125334	-0.124242	-0.247406	0.233165	-0.0778709	0.0951786	-0.0174515	0.393451	0.0828787	0.0988804	0.210268	-0.125422	0.0644037	-0.24101	0.248467	0.0632052	0.197642	-0.0322637	0.0222284	-0.111105	0.146552	-0.129645	0.0381658	0.1038	0.0407274	0.0610911	-0.189166	-0.0973794	0.198855	0.0233206	-0.119157	0.137702
REACTOME_EPIGENETIC_REGULATION_OF_GENE_EXPRESSION	0.277725	-0.22053	-0.207568	-0.14354	0.182697	-0.13549	0.0692648	-0.111474	-0.0886441	0.0680537	0.41524	-0.409221	-0.0921437	-0.252892	-0.297162	0.150842	0.00411136	-0.0784755	0.122033	-0.300132	-0.145331	0.221864	-0.186146	-0.0623447	0.133067	0.215283	-0.197637	-0.133591	-0.318956	0.0245172	-0.0925408	-0.0330148	0.380633	-0.150834	-0.168502	0.107686	0.00859871	-0.000370378	-0.2445	0.188048	-0.0555321	-0.301061	-0.248202	0.18027	0.101624	-0.479567	0.110583	-0.253399	0.0890787
REACTOME_NOTCH1_INTRACELLULAR_DOMAIN_REGULATES_TRANSCRIPTION	-0.312898	-0.100118	-0.396418	0.0617533	0.24066	0.0889641	0.340023	0.332064	-0.210065	-0.457413	-0.330471	-0.000886398	0.365569	-0.24631	0.394855	-0.178571	0.220729	-0.239061	0.102657	0.151097	-0.508743	0.287981	0.446514	0.306887	-0.0997571	-0.468951	-0.0403731	0.616719	0.159276	0.328504	-0.405059	-0.255128	-0.0699954	0.271869	-0.330093	0.238033	0.0711093	0.254158	0.183231	0.37599	0.471326	0.0572023	0.267734	0.00866511	-0.392824	-0.415912	0.142516	-0.224854	-0.403101
REACTOME_ACTIVATED_NOTCH1_TRANSMITS_SIGNAL_TO_THE_NUCLEUS	-0.687015	-0.0796675	-0.539742	-0.205886	0.165955	0.391949	0.0630795	0.0954724	0.00762875	-0.581409	-0.502561	-0.254713	0.277545	-0.234324	-0.395997	-0.385303	0.522221	-0.511032	0.0897132	0.151604	-0.442997	0.397035	0.55555	0.230245	-0.0407802	-0.606057	-0.344719	0.323178	0.23688	0.471475	-0.323548	-0.103355	-0.347023	-0.119609	-0.250516	0.475895	0.29577	0.305004	0.224761	0.349458	0.449888	-0.144471	0.62833	0.42731	-0.539634	-0.478188	0.0973509	-0.400635	-0.57791
REACTOME_PRC2_METHYLATES_HISTONES_AND_DNA	0.440044	-0.336841	-0.333405	-0.293455	0.267499	-0.316618	0.129415	-0.358504	-0.236264	-0.0625255	0.62511	-0.585169	-0.0831432	-0.316366	-0.361026	0.115885	-0.0342215	-0.16617	0.335447	-0.502244	-0.230571	0.294818	-0.349707	-0.255865	0.255111	0.338113	-0.189041	-0.209796	-0.436193	0.0889592	0.000911231	0.0151522	0.559845	-0.182956	-0.171702	0.281699	0.121653	0.00833836	-0.503185	0.221478	-0.189697	-0.253136	-0.381986	0.42401	0.170392	-0.676041	0.14782	-0.448652	-0.0660189
REACTOME_MOLECULES_ASSOCIATED_WITH_ELASTIC_FIBRES	-0.0997146	0.0594957	-0.000130743	-0.240714	-0.279008	-0.0583314	0.0328615	0.462957	-0.135755	-0.371134	-0.313926	0.278982	-0.1284	-0.0383621	0.0819211	0.214186	0.112395	0.0736738	-0.329279	0.0682086	-0.0767103	-0.32603	-0.362995	-0.0717658	-0.492814	-0.32861	-0.0559302	-0.273534	0.179913	-0.36037	-0.00291148	-0.183462	-0.18182	-0.248508	-0.0708714	-0.242608	0.277212	-0.422656	0.369886	-0.367331	-0.385266	-0.21359	-0.431381	0.0757982	0.182562	0.0437533	0.248723	-0.109362	-0.0710657
REACTOME_MHC_CLASS_II_ANTIGEN_PRESENTATION	0.334814	0.175819	-0.141649	0.0961192	-0.221876	0.0619962	0.0308444	0.239459	-0.0596463	-0.0505129	-0.165495	0.0915684	-0.186654	-0.199125	-0.121622	-0.21852	-0.258564	-0.133007	-0.273533	0.170606	-0.0575265	0.00610149	-0.00491856	-0.228795	0.0823403	-0.0131977	-0.0831673	-0.0939891	0.00355119	-0.130878	-0.395186	0.0746149	-0.190621	0.00861489	-0.255861	-0.423239	-0.0417691	-0.2835	0.206137	-0.0899396	-0.141995	-0.0475264	-0.125478	0.123261	0.0685247	-0.0840553	-0.0537731	0.00782574	-0.0599944
REACTOME_ARACHIDONIC_ACID_METABOLISM	-0.290759	0.0241169	-0.00623777	0.161288	0.115222	0.095437	0.363658	-0.013542	-0.221729	-0.0289536	-0.412339	-0.104005	-0.222562	-0.276141	-0.347831	-0.12688	-0.0501739	-0.370037	-0.15885	-0.30416	-0.210845	-0.110053	-0.0889595	-0.237475	-0.334852	-0.233557	-0.323322	0.141241	-0.167053	-0.229688	-0.334059	-0.231729	-0.136566	-0.024854	-0.183433	-0.0799687	-0.112591	-0.270279	-0.248955	0.0288904	0.021461	-0.152693	-0.0539557	-0.339359	0.0143239	-0.218525	-0.327881	-0.259087	-0.311873
REACTOME_TRANSCRIPTIONAL_ACTIVATION_OF_MITOCHONDRIAL_BIOGENESIS	0.180609	0.296535	-0.0144558	0.262909	0.152738	0.00320993	-0.115697	-0.150878	-0.111409	0.00069483	0.181613	-0.234178	0.165147	0.1514	0.2174	0.27269	-0.30285	-0.137998	-0.0504717	-0.108258	-0.159996	-0.0470924	-0.226286	0.20135	0.289871	0.149119	-0.0500631	0.254011	0.315446	0.0203632	0.0659258	0.0647082	-0.0489427	0.199034	-0.213762	-0.196824	0.0963641	-0.0624697	-0.354697	-0.0939009	0.148334	0.0639298	-0.0548785	-0.25847	-0.0671387	-0.308825	-0.232095	-0.0613738	-0.227372
REACTOME_INTEGRIN_CELL_SURFACE_INTERACTIONS	-0.155493	-0.0758692	0.05612	-0.133209	-0.0175136	0.145742	-0.174305	-0.049909	-0.0481648	0.0137582	-0.280639	0.0346689	0.272447	-0.00538722	0.0333452	0.0303847	0.0261024	0.0296964	0.211835	0.0596639	-0.127664	-0.370394	0.0128686	-0.123277	-0.165986	-0.254092	0.038225	-0.233126	-0.0241167	0.0085088	0.241638	-0.0902043	-0.0429212	-0.393969	-0.105413	0.0640711	-0.184302	-0.24192	0.0947708	-0.19933	-0.17394	-0.0268152	-0.128556	-0.0367803	-0.0170372	-0.169777	-0.0852428	-0.261893	-0.0608656
REACTOME_SYNTHESIS_OF_PROSTAGLANDINS_PG_AND_THROMBOXANES_TX_	-0.245139	0.24073	0.188363	0.0804693	0.129467	-0.00364125	0.436282	-0.0233586	-0.163738	0.0330714	-0.293804	-0.192098	-0.281386	-0.0515699	0.0485309	-0.0336128	0.0560641	-0.052202	0.0687143	0.0435418	-0.219815	-0.218182	0.0626466	-0.170827	-0.364915	-0.137655	0.202004	0.100869	0.00859028	-0.0772712	-0.0476059	0.0199194	-0.163681	-0.2586	-0.0038142	-0.100565	-0.155997	-0.538904	-0.538119	0.117303	0.110343	0.0135493	-0.0684054	-0.305768	-0.319599	-0.304152	-0.190545	-0.328508	-0.311873
REACTOME_SCAVENGING_OF_HEME_FROM_PLASMA	-0.283226	-0.391744	-0.00609181	0.289426	0.549306	0.0598951	0.238884	-0.202829	-0.165068	-0.596124	-0.313714	-0.0662264	0.326706	0.185449	-0.762948	-0.635772	-0.363908	-0.458944	0.509068	0.470977	-0.310396	-0.499559	0.184999	-0.318762	-0.661642	-0.545262	-0.243321	-0.570893	-0.534691	0.239245	0.28537	-0.486248	-0.418982	-0.525374	-0.209365	0.167977	0.419274	0.466064	0.573797	0.67695	-0.153938	0.421992	0.587554	0.481252	0.375401	0.418702	0.0984893	0.267416	-0.0229216
REACTOME_DAP12_INTERACTIONS	0.132951	0.238346	0.0554901	0.250003	0.0971057	-0.0731809	-0.12539	0.237635	-0.179798	0.227972	0.275337	-0.0804463	-0.179513	0.100787	-0.108265	0.212293	0.0623262	0.114925	0.191624	0.13226	-0.0466145	0.00784697	0.291335	0.461496	0.235012	0.105657	-0.0693788	0.385655	-0.292532	0.0278277	-0.193916	0.0697371	-0.0458751	0.201676	0.186916	-0.272729	-0.0999058	-0.240743	0.117403	0.309999	0.0502131	-0.117724	0.280167	0.0402025	-0.343433	-0.13526	-0.399708	-0.0872063	0.089364
REACTOME_BINDING_AND_UPTAKE_OF_LIGANDS_BY_SCAVENGER_RECEPTORS	0.00790105	-0.332073	-0.109205	-0.0731798	0.171986	-0.00967833	-0.0446654	-0.160847	-0.0562243	-0.422919	-0.169851	-0.14361	-0.0245538	-0.114257	-0.42943	-0.425337	-0.228262	-0.305866	0.0508676	-0.0256288	-0.399115	-0.366946	-0.0426742	-0.172061	-0.440769	-0.378299	-0.181171	-0.430736	-0.237204	-0.150504	0.000939459	-0.390511	-0.284836	-0.30065	0.00596573	0.01111	0.302293	0.11842	0.331594	0.260877	-0.351666	0.172153	0.187266	0.310081	-0.0368581	0.0861138	-0.101412	-0.138756	-0.161076
REACTOME_DOWNREGULATION_OF_TGF_BETA_RECEPTOR_SIGNALING	-0.408132	0.400767	-0.0463693	0.394731	0.324486	0.127552	-0.0820592	-0.0979315	0.594035	-0.0814899	-0.0991609	-0.610567	0.232873	-0.173225	-0.196652	-0.737485	0.0728929	-0.652491	0.107197	-0.477721	-0.161948	0.137914	0.412391	-0.0678237	-0.150042	-0.700464	-0.495254	0.050337	-0.191773	0.397586	-0.212107	0.514044	-0.42721	0.185192	-0.104515	0.374541	0.272528	0.0353604	0.423613	0.536988	0.194601	0.276774	0.495615	0.130934	-0.358201	-0.705034	0.244514	-0.233131	-0.48879
REACTOME_TGF_BETA_RECEPTOR_SIGNALING_ACTIVATES_SMADS	-0.241894	0.352673	-0.000251882	0.355705	0.268888	0.13678	-0.0946032	-0.093289	0.436672	-0.0311751	-0.113353	-0.509622	0.288832	0.0589319	-0.196372	-0.532857	0.0960867	-0.441134	0.208928	-0.432163	-0.136019	0.216477	0.316226	-0.0702916	0.00651599	-0.59979	-0.394679	0.11567	-0.0830038	0.39653	-0.073713	0.480007	-0.22691	0.206268	-0.0469252	0.39656	0.24375	0.148367	0.329448	0.499407	0.185373	0.394373	0.469184	0.220761	-0.235456	-0.5856	0.196013	-0.161769	-0.267343
REACTOME_TGF_BETA_RECEPTOR_SIGNALING_IN_EMT_EPITHELIAL_TO_MESENCHYMAL_TRANSITION_	-0.0440338	-0.213743	-0.491547	-0.26711	0.327431	0.164821	0.325173	0.0609418	-0.0154163	-0.383526	-0.529549	-0.557261	0.009749	-0.211067	-0.144428	-0.289193	0.196572	-0.65268	0.267961	-0.426264	-0.671137	0.379741	0.298526	-0.108273	0.151388	-0.615516	-0.532071	0.134554	0.161112	0.361114	-0.530011	0.0203461	-0.372963	-0.218902	-0.42035	0.109824	0.19436	0.337191	0.0559568	0.386687	0.492573	0.0991704	0.348826	0.327389	-0.549788	-0.519877	-0.368401	-0.22583	-0.423029
REACTOME_TRANSCRIPTIONAL_ACTIVITY_OF_SMAD2_SMAD3_SMAD4_HETEROTRIMER	-0.477739	0.416059	-0.346288	-0.0752014	0.316927	0.209068	0.242691	0.246076	-0.332274	-0.279288	-0.408994	-0.547196	0.0695403	-0.286838	-0.049613	-0.408586	-0.15239	-0.30238	-0.185829	-0.295404	-0.277022	0.27292	0.349381	-0.266768	-0.022062	-0.377868	0.131107	0.0797429	-0.225787	0.517268	-0.397139	0.302538	-0.144167	0.12155	-0.482737	-0.0404423	0.207149	0.497477	0.142936	0.153637	0.494346	0.28216	0.332219	0.39216	-0.514214	-0.369463	0.0883815	-0.293894	-0.17099
REACTOME_SMAD2_SMAD3_SMAD4_HETEROTRIMER_REGULATES_TRANSCRIPTION	-0.549313	0.286342	-0.410751	0.144758	0.447075	0.5379	0.448526	0.294395	-0.507816	-0.479491	-0.548574	-0.483295	0.101861	-0.422017	-0.327833	-0.62447	0.121711	-0.53047	-0.218194	-0.226136	-0.440962	0.309602	0.343991	-0.305457	-0.345766	-0.550505	0.212247	0.218228	-0.211639	0.685398	-0.551106	0.255192	-0.22306	-0.0812269	-0.57299	0.0758872	0.35518	0.34357	-0.00459928	0.201616	0.543588	0.204664	0.37079	0.458159	-0.677659	-0.471494	-0.204058	-0.216911	-0.265093
REACTOME_VISUAL_PHOTOTRANSDUCTION	-0.277077	0.202646	0.132883	0.0292637	-0.280826	-0.135431	0.115309	-0.188498	0.16721	-0.0902951	-0.146923	0.101764	-0.324947	-0.119188	-0.138414	-0.0274432	0.29678	0.0825777	-0.315077	-0.132038	-0.0149722	-0.435945	-0.119158	0.217302	-0.362378	-0.0968401	0.225554	-0.407875	0.21479	-0.236023	-0.0865657	-0.0798652	0.0658083	-0.419524	0.168833	-0.381231	-0.165927	-0.0351357	-0.238787	-0.288062	-0.400073	-0.295211	0.0105914	-0.104085	0.319042	-0.219762	0.09055	-0.0409303	-0.450286
REACTOME_PI3K_AKT_SIGNALING_IN_CANCER	-0.474091	0.184588	-0.052688	-0.0845472	0.186797	0.122313	-0.0419999	0.184618	0.202495	0.172511	0.0289122	0.0539213	0.097433	0.37709	0.181748	-0.00649911	0.195013	-0.0473373	0.172666	-0.092653	0.0350845	0.0614729	0.200456	0.0723748	0.139296	0.116289	0.2052	0.168507	-0.0495014	0.210778	-0.186201	0.17514	0.175196	0.340771	0.188984	-0.0570716	0.0225577	-0.0453752	-0.0636131	0.10333	0.0112736	0.0556508	0.0278058	-0.170303	-0.117485	-0.200735	-0.0929401	0.0465639	0.147615
REACTOME_CONSTITUTIVE_SIGNALING_BY_ABERRANT_PI3K_IN_CANCER	-0.457549	0.118404	0.00619846	-0.00270421	0.28641	0.122214	-0.0903963	0.218485	0.207513	0.139447	-0.0155037	-0.0165963	0.0805047	0.440856	0.220171	-0.0676793	0.204611	-0.0592833	0.166936	-0.0741333	0.136535	0.0891456	0.176448	0.137241	0.158979	0.16306	0.22522	0.22515	-0.0416184	0.29982	-0.210559	0.228955	0.227166	0.364721	0.361936	-0.0453633	-0.0736224	-0.109243	0.0963467	0.128332	0.141834	0.0689973	0.176186	-0.144437	-0.0378646	-0.114832	-0.319846	0.20964	0.242659
REACTOME_CONDENSATION_OF_PROPHASE_CHROMOSOMES	0.365279	-0.391258	-0.279648	-0.390026	0.0640048	-0.359451	-0.00557468	-0.39864	-0.23455	-0.19474	0.532221	-0.556455	-0.0136774	-0.312549	-0.338978	0.151769	-0.0643449	-0.15325	0.374401	-0.487109	-0.238366	0.377124	-0.365293	-0.310328	0.305488	0.231465	-0.204615	-0.249095	-0.376569	0.079198	0.0742753	0.107622	0.563887	-0.166486	-0.195415	0.326397	0.0133936	0.0239417	-0.462366	0.121128	-0.225869	-0.148884	-0.390555	0.414826	0.196517	-0.653022	0.188926	-0.389016	0.0260389
REACTOME_SIGNALING_BY_TYPE_1_INSULIN_LIKE_GROWTH_FACTOR_1_RECEPTOR_IGF1R_	-0.258477	-0.132917	0.0523495	0.208742	-0.278862	0.0456249	-0.209675	-0.225725	0.155742	0.312458	-0.121643	0.242637	0.0645884	0.423446	0.333256	0.334179	0.393028	0.232498	0.398407	0.313776	0.0458033	0.226235	0.340845	0.212229	0.389338	0.216345	0.449636	0.326581	0.180285	0.223491	0.0483832	0.304819	0.447278	0.433045	0.416249	0.246472	0.400119	0.163141	0.309278	0.225439	0.197487	0.378493	0.308856	0.390446	0.485364	0.244123	0.377774	0.304183	0.302587
REACTOME_SELENOAMINO_ACID_METABOLISM	-0.0886604	-0.0571531	-0.107788	0.0118944	0.182146	0.167372	0.138906	0.028335	-0.0886187	-0.126897	0.0611992	0.0371619	0.116185	0.148249	0.076586	-0.0674075	-0.0126591	-0.175821	0.223943	-0.122783	-0.0835482	0.266031	0.114301	0.0460136	0.182385	0.112283	0.0467549	0.25495	0.0217346	0.154201	0.00960516	0.203386	-0.0733368	0.156018	0.0292206	0.0743171	-0.0112102	0.120858	0.0162053	0.0380389	0.0988413	-0.0893147	0.0890226	0.0606622	0.151722	-0.0320226	0.0439198	0.0104722	0.101198
REACTOME_DAP12_SIGNALING	-0.00323931	0.250208	-0.0507783	0.188778	0.157513	-0.052823	0.0402836	0.285015	-0.0744687	0.113831	0.209524	0.0740796	-0.125635	0.265325	-0.0152381	0.0817205	0.0391997	0.0935254	0.250018	0.230532	0.121332	0.177693	0.267063	0.485334	0.362981	0.210169	0.129955	0.473378	-0.225428	-0.0190343	-0.112024	0.165922	0.107724	0.327881	0.275343	-0.157309	-0.130441	-0.153279	0.20942	0.194161	-0.0511926	0.0169979	0.342855	-0.0674386	-0.26156	-0.00819158	-0.339313	0.0813333	0.242574
REACTOME_ACTIVATION_OF_GENE_EXPRESSION_BY_SREBF_SREBP_	-0.220403	-0.112633	-0.10346	-0.0283761	-0.0963923	0.0605601	0.0631393	-0.0894113	0.139766	0.216819	-0.417648	0.1041	-0.191921	0.114991	-0.110837	-0.186443	-0.0594205	-0.0872636	-0.171162	0.190048	-0.0922372	-0.0494501	-0.316027	0.069663	-0.293716	-0.0817521	-0.0549604	0.0415383	-0.192634	0.154785	-0.214062	-0.181373	0.0921945	-0.308939	-0.0826336	0.160775	0.191736	-0.281651	-0.233896	-0.354549	-0.269541	-0.037743	-0.163991	-0.259029	-0.0859382	-0.0667824	-0.0258314	-0.300141	-0.299572
REACTOME_FC_EPSILON_RECEPTOR_FCERI_SIGNALING	-0.21447	-0.0119762	-0.219853	-0.0499255	0.099579	0.0282864	0.111495	0.0550451	-0.0734623	-0.06153	-0.0451045	0.0769603	-0.0574718	-0.086811	0.23316	-0.124023	0.12886	-0.094801	0.0411334	0.102811	-0.147783	0.16107	0.119747	0.0484506	0.151454	-0.0899937	-0.0388319	0.30106	-0.029472	-0.128264	0.089557	0.138818	-0.144248	0.0895924	0.033847	-0.102202	0.0994071	-0.00639214	-0.016936	0.0419388	0.233956	0.056629	0.12092	0.0327217	-0.0973237	-0.144079	-0.0714039	-0.0584395	-0.110231
REACTOME_SEPARATION_OF_SISTER_CHROMATIDS	-0.111528	0.0881448	-0.209368	0.141584	-0.0305906	-0.0826103	-0.00588194	0.0748728	0.0405235	-0.244983	-0.212267	0.0227578	-0.119324	-0.222029	0.0988464	-0.242752	-0.0890608	-0.0997319	-0.14478	0.084124	0.0167118	0.088745	0.0642077	-0.078191	0.0496937	-0.125601	-0.0403564	0.183236	0.083667	-0.19213	-0.137168	0.00253748	-0.27968	-0.00152232	0.0540243	-0.159717	0.0206772	-0.159975	-0.0203789	0.00866579	-0.0455934	-0.0538268	-0.0189757	0.0173178	0.027414	-0.186316	-0.0978841	-0.0707957	-0.108943
REACTOME_RESOLUTION_OF_SISTER_CHROMATID_COHESION	0.0302538	0.105448	-0.123664	0.243184	-0.106109	-0.129103	0.00090718	0.147626	0.0512101	-0.288256	-0.248959	0.0269488	-0.080172	-0.213858	-0.079063	-0.215336	-0.252477	-0.076615	-0.201734	0.0860311	0.12832	-0.00160356	0.0760126	-0.168114	0.0505366	-0.069032	-0.0356235	0.0297443	0.106995	-0.121546	-0.221986	-0.115	-0.275558	-0.0664111	0.123098	-0.128465	-0.0609937	-0.286127	0.0235007	0.0189698	-0.249509	-0.14409	-0.0491313	-0.0134689	0.175165	-0.195493	-0.14428	-0.0487941	-0.0396803
REACTOME_THE_PHOTOTRANSDUCTION_CASCADE	0.353788	0.0537933	0.0971446	-0.126364	0.106	0.0626461	-0.110866	0.174696	0.209466	0.261621	0.333996	-0.553259	-0.0803703	-0.288703	-0.0402018	0.0448081	-0.142174	0.213762	-0.0456825	-0.341855	-0.22961	-0.333382	0.191008	-0.597319	-0.228666	-0.358924	-0.170618	-0.275256	-0.266693	-0.365096	-0.023197	-0.417629	-0.199798	-0.452582	0.00336799	-0.320754	-0.378467	-0.331204	-0.379523	0.0654903	-0.378275	0.0242507	0.0219218	-0.503801	-0.119126	-0.258676	0.126129	0.0850294	-0.434992
REACTOME_MITOTIC_METAPHASE_AND_ANAPHASE	-0.106131	-0.0104848	-0.159962	0.0720283	0.00517657	-0.101322	-0.0107225	0.0582905	-0.0199373	-0.202985	-0.14291	-0.00544001	-0.0592623	-0.166651	0.0945748	-0.20186	-0.0892508	-0.00177135	-0.106972	0.0406271	0.0691499	0.0871564	0.00871188	-0.0688843	0.0740295	-0.0651384	-0.0564972	0.146494	-0.0182136	-0.0879422	-0.218905	-0.0261685	-0.227024	-0.0269669	0.0483576	-0.124207	0.0078544	-0.061382	-0.019752	-0.00472077	-0.0330212	0.02415	0.0121815	-0.0216625	0.0172145	-0.147135	-0.0122776	-0.00437633	-0.0860485
REACTOME_OXIDATIVE_STRESS_INDUCED_SENESCENCE	0.109993	-0.292208	-0.362228	-0.213837	0.263901	-0.162108	0.195905	-0.255589	-0.291556	-0.264077	0.311554	-0.453121	-0.0116843	-0.290875	-0.195434	-0.0085192	-0.0470085	-0.125565	0.155815	-0.325187	-0.198208	0.374069	-0.0728781	-0.179152	0.190621	0.0167249	-0.108631	-0.0318631	-0.274217	0.111348	-0.138955	0.0769151	0.344429	-0.133453	-0.231757	0.181446	0.0857317	0.103271	-0.179043	0.0459885	0.0591058	-0.117985	-0.133084	0.197107	-0.099036	-0.570804	0.0720327	-0.318654	-0.185472
REACTOME_SENESCENCE_ASSOCIATED_SECRETORY_PHENOTYPE_SASP_	0.286543	-0.268871	-0.302331	-0.365518	0.231844	-0.244078	0.192226	-0.304321	-0.319829	-0.278865	0.46993	-0.525498	0.0445091	-0.322048	-0.36252	0.00832742	0.0906136	-0.247389	0.211057	-0.459915	-0.334654	0.394066	-0.177707	-0.0511831	0.216	-0.0298322	-0.261429	-0.0780984	-0.375105	0.202499	-0.146712	-0.0102847	0.317454	-0.231245	-0.306399	0.147218	0.16394	0.09051	-0.356292	0.241542	-0.00639903	-0.0446027	-0.089817	0.483369	-0.0562601	-0.630286	0.0893993	-0.266267	-0.298266
REACTOME_CELLULAR_SENESCENCE	0.172638	-0.149254	-0.246087	-0.135062	0.199672	-0.137438	0.151166	-0.174884	-0.277409	-0.212818	0.333179	-0.417085	0.0179806	-0.243539	-0.249447	0.0143019	-0.0300674	-0.148646	0.0739177	-0.298268	-0.19077	0.285367	-0.0864012	-0.0237112	0.128338	0.0811286	-0.114777	0.0180523	-0.21786	0.09699	-0.152675	0.0255625	0.245705	-0.115791	-0.182925	0.0627994	0.151112	0.0379414	-0.256209	0.0121988	0.0138074	-0.13236	-0.0305127	0.216657	-0.0954976	-0.480693	0.064612	-0.260459	-0.17528
REACTOME_ONCOGENE_INDUCED_SENESCENCE	-0.402037	0.349354	-0.417804	0.105628	0.499067	0.380276	0.395637	0.190501	-0.386211	-0.528992	-0.262957	-0.303206	-0.105278	-0.546587	-0.0649928	-0.640368	0.0360493	-0.444095	-0.226421	-0.373061	-0.588759	0.0199828	0.442467	-0.175122	-0.304502	-0.530645	-0.297522	0.235433	-0.381019	0.412305	-0.564689	-0.0546458	-0.427134	-0.421725	-0.564078	-0.0914479	0.217851	0.129828	0.169699	0.0293493	0.438437	0.0551824	0.442108	-0.0505981	-0.668447	-0.652603	-0.489287	-0.0418673	-0.649241
REACTOME_DNA_DAMAGE_TELOMERE_STRESS_INDUCED_SENESCENCE	0.194494	-0.283007	-0.238067	-0.246496	0.103072	-0.367221	0.148954	-0.37446	-0.411099	-0.14694	0.561514	-0.603545	-0.00557439	-0.240207	-0.381313	0.146065	-0.146955	-0.120992	0.298836	-0.446827	-0.172217	0.269694	-0.357887	-0.239159	0.16598	0.350318	-0.227689	-0.207468	-0.404937	0.17681	-0.0360659	-0.0100877	0.5094	-0.184657	-0.160159	0.221841	0.0843765	0.0435841	-0.424716	0.173609	-0.139609	-0.251809	-0.383941	0.431803	0.199109	-0.632782	0.139429	-0.403084	0.0245407
REACTOME_REGULATION_OF_PLK1_ACTIVITY_AT_G2_M_TRANSITION	0.11248	0.261295	-0.0961254	0.166498	0.21258	0.20732	0.177547	0.253773	0.114658	-0.34037	-0.29005	0.00418615	0.0431561	0.0194981	-0.041806	-0.331787	0.103148	-0.37169	-0.158821	0.0454286	-0.220257	0.308141	0.247847	-0.0406732	0.22867	-0.26522	-0.162465	0.121955	0.210359	0.0289424	-0.182158	-0.0372723	-0.114476	0.13427	-0.0651761	-0.0241635	0.212243	-0.0359256	0.326476	0.104808	0.239043	0.193978	0.102144	0.125341	-0.0614176	-0.178407	0.099913	0.0237197	-0.2949
REACTOME_SIGNALING_BY_NOTCH1_PEST_DOMAIN_MUTANTS_IN_CANCER	-0.410053	-0.304941	-0.518855	-0.102017	0.244332	0.0696931	0.249607	0.149095	-0.162362	-0.483573	-0.351703	-0.159352	0.208072	-0.241237	-0.133783	-0.321408	0.272373	-0.513804	-0.0313484	0.0756955	-0.45496	0.183548	0.446532	0.142793	-0.109528	-0.508925	-0.30004	0.380778	0.189675	0.190609	-0.340542	-0.410979	-0.287313	-0.0132964	-0.313544	0.252599	0.00326982	0.0220599	0.00882456	0.132415	0.333672	-0.0520416	0.285805	0.0777436	-0.549856	-0.467255	0.114625	-0.320618	-0.442008
REACTOME_CASPASE_MEDIATED_CLEAVAGE_OF_CYTOSKELETAL_PROTEINS	-0.140775	-0.16825	-0.297768	-0.356527	-0.16946	0.478312	-0.187193	0.489861	-0.139679	-0.347416	-0.108718	0.610137	-0.129003	0.139567	-0.322751	-0.480013	0.367725	0.0871904	-0.134445	0.134922	0.13735	-0.167153	-0.138727	0.387901	-0.287905	0.273669	0.172837	-0.502653	0.11229	-0.0824113	0.165331	-0.280539	-0.36444	-0.249137	0.165002	-0.325189	0.0775793	-0.303757	0.165079	-0.0847752	-0.416906	-0.169736	0.233781	-0.304947	-0.0303392	-0.266735	0.0335935	0.44636	-0.0160207
REACTOME_INSULIN_PROCESSING	0.197216	0.145591	0.249344	0.232712	0.165476	0.072505	0.331477	0.199913	0.415921	0.516147	0.389461	-0.04831	-0.378121	0.0687967	0.212926	-0.246138	-0.11118	-0.194116	0.259572	-0.271022	0.261904	-0.207517	0.0592208	-0.218415	0.0846523	0.09374	-0.0752668	-0.232548	-0.352479	-0.136684	0.103971	0.0173368	0.11164	-0.172176	-0.217642	0.0472733	0.289348	-0.299369	-0.00132184	-0.20087	-0.276846	-0.152097	-0.0263596	0.00501289	0.313571	0.0491419	0.0386679	-0.0478815	0.0502829
REACTOME_STIMULI_SENSING_CHANNELS	-0.0705527	-0.0139824	-0.382865	-0.141257	0.182547	0.33	0.145239	0.269722	-0.136288	-0.342512	-0.410606	-0.458298	0.282981	-0.261853	-0.217783	-0.363921	0.192656	-0.190769	-0.0920959	-0.253341	-0.356272	0.169268	0.139578	0.180295	-0.143693	-0.560716	0.018592	0.404321	0.183176	0.0736416	-0.29236	0.00134588	-0.438407	0.0615211	-0.574661	-0.0761642	0.0941568	0.262188	0.215601	0.314515	0.468113	0.34978	0.190772	0.218875	-0.535896	-0.433918	-0.0511733	-0.370141	-0.328849
REACTOME_EPH_EPHRIN_SIGNALING	0.224428	-0.210108	-0.0939635	-0.263027	-0.15267	-0.159287	-0.00920967	-0.237405	0.150911	-0.0660392	-0.0548799	0.116408	0.120361	-0.0483076	-0.0370374	-0.0989948	0.03951	-0.0970736	-0.192904	0.209299	-0.120012	-0.225384	-0.0648389	0.0826793	0.00053512	-0.0834706	-0.044008	0.0368599	0.0586936	-0.230757	-0.0489918	0.161935	0.253927	-0.154027	0.0486166	0.00618806	0.300237	-0.226125	0.228158	0.0570817	-0.118714	0.178292	0.0748625	-0.133271	0.0216794	-0.0965297	-0.06272	0.120006	0.167598
REACTOME_ROLE_OF_LAT2_NTAL_LAB_ON_CALCIUM_MOBILIZATION	0.0342149	0.0377257	0.103279	0.247453	0.375208	0.237996	0.189795	0.0266362	0.0310122	-0.0309352	-0.179188	0.132943	0.346313	0.220819	-0.324166	-0.212213	-0.041628	-0.178857	0.445596	0.437366	-0.113135	-0.0652753	0.235025	-0.107944	-0.172731	-0.0939671	-0.114413	-0.14029	-0.385178	0.166542	0.443575	0.109525	-0.169449	-0.176615	0.364531	0.345875	0.450026	0.271035	0.367454	0.294777	0.345456	0.360326	0.391916	0.300473	0.159996	0.448456	0.143799	0.00608828	0.448119
REACTOME_FCERI_MEDIATED_MAPK_ACTIVATION	-0.251232	-0.00376251	-0.232523	-0.215174	0.22828	0.0457211	0.150424	-0.0257223	-0.087301	-0.186625	-0.120637	0.252007	0.226503	0.236401	0.107205	-0.122758	-0.0365706	0.0776389	0.285104	0.136329	-0.117393	0.00671699	0.300643	0.129938	0.078781	0.144364	-0.0445908	0.164207	-0.26205	0.124904	0.200247	0.210398	-0.174348	0.00587633	0.237456	0.314531	0.196708	0.117512	0.2588	0.431295	0.15252	0.227417	0.415572	0.160604	0.0337837	0.043181	-0.175176	0.346652	0.207635
REACTOME_FCERI_MEDIATED_CA_2_MOBILIZATION	0.102523	-0.0166725	0.186812	0.154749	0.0184499	0.0232289	0.0152917	0.205416	-0.165926	-0.0597768	-0.154593	-0.122706	0.00255935	-0.28781	-0.395309	-0.173152	-0.183213	-0.129016	0.0227001	0.387178	-0.295366	-0.305773	-0.0355086	-0.279613	-0.0506117	-0.125419	-0.223787	-0.0152436	-0.46255	-0.171625	0.117344	-0.112606	-0.0846655	-0.158739	-0.0358727	-0.233524	0.0350446	-0.277342	-0.114062	4.83921e-05	0.0264964	-0.0409642	-0.0420651	-0.0731953	0.105213	-0.151624	-0.381673	-0.326354	-0.0398871
REACTOME_FCERI_MEDIATED_NF_KB_ACTIVATION	-0.272021	-0.0331429	-0.234088	-0.00709339	0.157502	0.0696159	0.0827697	0.0911085	-0.0222772	-0.147098	-0.14207	0.00761267	-0.101309	-0.197523	0.260145	-0.25355	0.116014	-0.281654	0.00576203	0.0708347	-0.233415	0.213865	0.109386	-0.0114796	-0.00879335	-0.221547	-0.150104	0.263044	0.0324917	-0.27652	0.0567948	0.110184	-0.286495	-0.0183508	-0.0191778	-0.143044	0.137737	0.0184529	-0.120254	0.0510971	0.224853	0.0500249	0.0493585	0.0259486	-0.13098	-0.18515	0.0315488	-0.130731	-0.160304
REACTOME_PEPTIDE_HORMONE_METABOLISM	0.0480223	0.00530771	0.313509	0.155772	-0.0737815	0.000571757	0.285811	0.11683	0.0258303	0.253591	-0.0483744	0.00592003	-0.198277	-0.124215	0.316074	-0.063475	0.0148175	0.117508	0.00547367	-0.0942468	-0.0315401	-0.251393	-0.221553	-0.182108	-0.00941478	-0.0709616	0.117845	-0.115677	-0.109225	-0.12301	-0.0513745	0.078158	0.185656	-0.0592019	-0.0940114	-0.0900382	0.268566	-0.183787	0.033157	-0.182913	-0.1905	-0.0470016	-0.222304	-0.104213	0.166059	-0.0700272	0.23812	-0.0325948	-0.0803546
REACTOME_NUCLEAR_ENVELOPE_BREAKDOWN	-0.0500569	-0.230056	0.096282	0.0397662	0.244601	-0.0769997	0.0117684	0.195636	0.0780332	0.0220934	-0.120084	0.0755022	0.115424	0.185664	0.100666	0.00892487	0.215676	0.00638272	0.230226	0.156609	0.257632	0.0627983	0.24203	0.0214959	0.213883	0.165199	0.0667911	0.221813	-0.104925	0.317874	-0.108747	0.0964058	0.17996	0.0638086	0.203853	0.117109	0.345274	0.164752	0.103832	-0.00508561	0.212963	0.0307365	0.207267	0.086901	0.21732	0.132862	0.264703	0.131907	0.088223
REACTOME_SUMOYLATION	0.0736844	-0.0622675	0.144258	-0.00498715	0.207555	-0.081496	0.0295329	0.125939	-0.0360536	0.013712	-0.0308706	0.0288261	0.107686	0.0258091	0.112855	-0.0547521	0.232942	0.0563847	0.0759215	0.0488801	0.204075	0.159437	0.120631	0.214057	0.220188	0.202256	0.158269	0.232858	0.0273825	0.0408795	-0.0865525	0.0790025	0.218528	0.07257	0.190079	0.148537	0.0957479	-0.0173745	0.0326596	-0.0877908	0.130531	-0.0511729	0.190045	-0.0229315	-0.0135452	-0.0484354	0.156894	-0.0200395	-0.066781
REACTOME_INITIATION_OF_NUCLEAR_ENVELOPE_NE_REFORMATION	0.0923805	-0.109966	0.0533282	0.238085	0.138342	-0.0502963	-0.196126	0.0653062	-0.144799	0.418554	0.173074	0.0441539	0.296212	0.381793	0.219856	0.436319	-0.103893	0.161668	0.00496606	-0.138667	0.377821	0.182792	0.0659237	-0.0216884	0.160658	0.232605	-0.0894075	-0.0848472	-0.400061	0.296633	-0.0828482	-0.129609	0.30543	-0.14981	-0.0859096	0.299133	0.1799	0.182217	0.232495	0.11019	0.14257	0.289553	0.288368	0.0361858	0.220566	0.0856667	0.350218	0.325904	0.114513
REACTOME_NUCLEAR_ENVELOPE_NE_REASSEMBLY	0.178802	-0.0685439	-0.129309	0.107353	-0.215462	-0.141572	0.0796588	0.129728	-0.18638	-0.175399	-0.134285	0.214046	-0.000118972	-0.155374	-0.107086	-0.085057	-0.20438	0.174188	-0.154431	0.138632	0.343959	0.0775521	-0.0325551	-0.0664198	0.275019	0.107872	-0.0203307	0.0599599	-0.00408702	0.112642	-0.295401	-0.0530015	-0.170775	-0.0647149	0.060037	-0.135485	0.0813699	-0.0650697	0.099971	0.0190192	-0.0879253	0.108612	0.118647	0.00199066	0.233259	-0.108612	-0.027299	0.196844	0.0139859
REACTOME_LAMININ_INTERACTIONS	-0.0665532	-0.120399	0.134367	0.06264	-0.16551	-0.372709	-0.0955621	0.0843943	-0.288706	-0.0417772	-0.302509	-0.28278	0.225537	-0.149513	0.0959334	0.0827184	-0.196602	-0.259615	-0.174399	0.0580398	-0.157302	-0.269353	0.088283	-0.31817	0.0694214	-0.430903	-0.149052	-0.0222458	-0.235182	0.294819	0.053942	-0.237797	0.0490115	-0.16756	-0.228804	0.185279	-0.0931011	0.0346781	-0.145543	0.00887993	0.137284	0.257054	0.115792	0.0482695	0.0100944	-0.131512	0.11128	-0.257919	-0.0723597
REACTOME_SYNDECAN_INTERACTIONS	0.263101	-0.0760842	-0.0683863	-0.469061	0.093758	-0.186043	-0.368485	0.198425	-0.212453	-0.101884	-0.383718	0.0576649	0.0229101	-0.0532053	0.0864323	0.284005	0.266207	0.270703	0.377796	0.14178	-0.200501	0.00140217	0.0823044	-0.0174341	0.134449	-0.31783	0.127186	-0.0578082	-0.205667	0.0334735	0.396964	0.164068	-0.205725	-0.23622	0.0715826	-0.155949	-0.153513	-0.0760496	0.123194	0.0732767	-0.164872	-0.112594	-0.126742	0.333122	0.185942	-0.0356648	0.0947278	0.0105351	-0.0803452
REACTOME_NON_INTEGRIN_MEMBRANE_ECM_INTERACTIONS	0.140647	-0.122328	0.0382035	-0.327226	-0.209443	-0.348135	-0.266288	0.0627777	-0.284542	-0.039105	-0.328431	-0.0440706	0.0578787	-0.141199	0.0110647	0.175684	0.0120424	0.0746784	-0.0876392	0.0814558	-0.177854	-0.302257	0.0957172	-0.0147793	-0.122562	-0.399351	0.0127127	-0.104679	-0.155374	0.124297	0.171837	0.0108964	0.0228868	-0.263692	-0.000653223	-0.157295	-0.167658	-0.205991	-0.134538	-0.0637087	0.00158923	0.000385227	-0.0976771	0.306538	0.0297111	-0.0701737	0.0746397	-0.203765	-0.244659
REACTOME_ECM_PROTEOGLYCANS	-0.0976127	-0.119045	-0.034081	-0.256247	-0.122105	-0.229825	-0.261894	-0.185782	-0.26932	0.123648	-0.261459	-0.108012	0.162071	-0.132454	0.128412	0.310538	-0.0783169	0.144733	-0.0720995	-0.118182	-0.104006	-0.184174	0.0733522	0.0225539	-0.0108691	-0.0558245	0.109205	-0.218398	0.0579358	0.0301857	0.337789	0.0571483	0.246963	-0.269181	0.0304519	0.0707112	-0.0668313	-0.236446	-0.187175	0.0188393	-0.134724	-0.171829	-0.142473	0.159701	0.0848096	-0.169109	-0.0742313	-0.277029	-0.0978669
REACTOME_SCAVENGING_BY_CLASS_A_RECEPTORS	0.175834	-0.165026	-0.137989	-0.159542	-0.314707	-0.0997313	0.0974426	-0.12502	0.0189111	-0.287351	-0.416851	-0.0516673	-0.188863	-0.449468	-0.32311	-0.089756	0.0221522	0.0598181	-0.390882	-0.329332	-0.466079	-0.228403	-0.203979	-0.0448422	-0.289871	-0.368598	0.0372814	-0.22298	-0.0473127	-0.166755	-0.2349	-0.439234	-0.0267892	-0.146192	0.290874	-0.0965155	0.210803	0.0727533	0.0881399	-0.0339174	-0.527212	-0.123979	-0.237267	0.168445	-0.00172133	-0.246631	-0.196891	-0.413497	-0.487038
REACTOME_SUMOYLATION_OF_DNA_DAMAGE_RESPONSE_AND_REPAIR_PROTEINS	-0.0811776	-0.20242	0.0406239	-0.0104997	0.240673	-0.216853	-0.0695705	0.16988	0.0723055	-0.017089	-0.121128	0.0784891	0.104499	0.145626	0.200064	0.0437818	0.324009	0.150144	0.167257	0.250135	0.303273	0.121475	0.249898	0.201206	0.308894	0.306587	0.219338	0.278674	0.0349678	0.201666	-0.209665	0.16809	0.112293	0.0462913	0.37424	0.134674	0.176893	0.235732	0.188965	-0.0527842	0.158417	0.0370211	0.257721	0.195925	0.164703	0.0368179	0.161625	-0.00124608	0.00829238
REACTOME_HDACS_DEACETYLATE_HISTONES	0.183846	-0.298901	-0.276591	-0.266815	0.18427	-0.196637	0.111985	-0.199801	-0.200145	0.0411233	0.498216	-0.541811	-0.102795	-0.286559	-0.438078	-0.035349	-0.171337	-0.0958761	0.0969833	-0.419922	-0.263531	0.195312	-0.307517	-0.070963	0.0899893	0.175352	-0.227068	-0.161692	-0.430411	-0.0893842	-0.187821	-0.136574	0.428845	-0.193938	-0.315795	0.134247	-0.117395	-0.0762786	-0.361295	0.158657	-0.205517	-0.335319	-0.330657	0.107755	0.126518	-0.626974	-0.0188051	-0.362151	-0.0777623
REACTOME_PKMTS_METHYLATE_HISTONE_LYSINES	0.569873	0.0973913	0.121245	0.133627	0.214244	0.623852	0.375014	0.505293	0.494752	0.226453	0.29486	0.191064	-0.503206	-0.377888	-0.259475	-0.0825344	0.116236	-0.270064	0.373674	0.027312	-0.0420962	0.325239	-0.149731	0.414363	0.204692	0.0470272	0.0436052	0.0911978	0.304065	-0.441543	0.0764945	0.138905	0.168061	0.172382	0.107464	-0.124598	0.0500296	0.149096	-0.178295	-0.223819	-0.0392696	-0.172228	0.245922	-0.274155	-0.198185	-0.0204112	0.285561	-0.308253	-0.152894
REACTOME_HATS_ACETYLATE_HISTONES	0.355358	-0.250965	-0.226946	-0.233085	0.164798	-0.229957	0.148556	-0.195581	-0.169776	0.14931	0.480864	-0.431029	0.0853311	-0.175044	-0.253296	0.268056	0.103191	-0.0106909	0.317089	-0.359235	-0.0671791	0.391797	-0.220273	-0.00742314	0.392545	0.337309	-0.0505287	-0.0763785	-0.248433	0.0456991	0.0688128	0.0666853	0.45551	0.00893232	-0.117479	0.291566	0.0865808	0.161481	-0.250456	0.213145	0.0683703	-0.0137144	-0.228765	0.246804	0.361308	-0.514114	0.12933	-0.314213	0.0227508
REACTOME_RMTS_METHYLATE_HISTONE_ARGININES	0.378208	0.0270163	-0.420727	0.224129	-0.028472	0.118945	0.203633	-0.228987	0.316904	-0.14037	0.376691	-0.328578	0.100135	-0.441903	-0.446385	-0.209869	-0.131597	-0.312573	0.205379	-0.400887	-0.325542	0.0571487	-0.251148	0.370332	0.298623	0.152015	-0.30034	0.169371	-0.498719	-0.426069	0.0976238	-0.288578	0.192521	0.133887	-0.0826661	-0.443032	-0.000627136	0.32281	-0.356167	-0.0107246	0.355424	0.216012	0.0428512	0.324818	0.314526	-0.534471	-0.395313	-0.101179	-0.368991
REACTOME_SUMOYLATION_OF_UBIQUITINYLATION_PROTEINS	-0.0759828	-0.334963	0.173723	-0.0931343	0.311918	-0.128905	-0.0586206	0.101568	-0.00852898	-0.0281472	-0.0452462	0.0358375	0.0817896	0.0783049	0.097344	-0.0869856	0.315276	0.0471847	0.301474	0.214384	0.226203	0.091708	0.204977	0.11804	0.276841	0.251655	0.140347	0.341007	-0.0523748	0.273822	-0.229778	0.146951	0.107663	0.00394359	0.276454	0.096281	0.283306	0.240474	0.0898574	-0.12448	0.188736	0.0548518	0.173	0.15006	0.16259	0.0277064	0.183308	0.00877717	0.0844193
REACTOME_CHROMATIN_MODIFYING_ENZYMES	0.269683	-0.0141656	-0.0750753	-0.0394001	0.1686	0.00199982	0.279797	0.0273361	0.023382	0.0909334	0.313222	-0.232077	-0.0373397	-0.232707	-0.280635	-0.0162073	0.0766775	-0.0514886	0.0668047	-0.235778	-0.105861	0.225439	-0.205283	0.0942255	0.243255	0.169509	-0.0799133	-0.0132647	-0.239133	-0.0934624	-0.0302205	-0.133025	0.266175	-0.03702	-0.125799	0.0678762	-0.075434	0.0384014	-0.212983	0.0725057	0.0645554	-0.0624269	-0.137559	0.0987107	0.200467	-0.376968	-0.00815852	-0.268256	-0.0344803
REACTOME_DEFECTS_IN_VITAMIN_AND_COFACTOR_METABOLISM	0.286255	-0.299532	-0.266986	-0.00943347	-0.0304904	0.169242	0.113718	-0.0227395	0.278756	0.0799886	-0.478385	0.32573	-0.192393	-0.27471	0.187393	0.0590801	0.516827	0.253767	-0.0642009	0.450156	-0.0951677	0.141912	-0.199771	0.0237883	-0.254128	0.013988	0.501186	-0.0153315	-0.0114419	-0.231149	0.068698	0.108805	0.43252	-0.189065	-0.375616	0.299204	-0.123704	-0.0125405	-0.363921	-0.66512	-0.327539	0.129498	0.458758	-0.443697	-0.3956	-0.169103	0.183926	-0.425476	-0.322396
REACTOME_DETOXIFICATION_OF_REACTIVE_OXYGEN_SPECIES	0.06188	-0.155616	-0.366834	0.330487	0.0883902	0.0993187	-0.0352863	-0.295436	-0.421911	-0.22048	-0.448107	-0.415405	-0.0897647	0.0132642	-0.214853	0.266711	-0.266729	0.115304	-0.0579209	-0.276853	-0.0880658	-0.0235315	-0.371216	-0.380525	0.402272	-0.0593845	-0.30365	0.00332511	0.172043	0.136457	0.395299	-0.0592801	-0.115226	0.149074	-0.037989	-0.356681	0.140424	0.0351911	-0.0699092	-0.342458	0.122349	0.0997334	-0.310589	-0.309117	-0.013365	-0.417221	-0.550344	0.0500857	-0.100714
REACTOME_NUCLEAR_PORE_COMPLEX_NPC_DISASSEMBLY	-0.0866377	-0.292982	0.114007	-0.0438591	0.274444	-0.111917	-0.10277	0.222953	0.0575664	-0.0319659	-0.074282	0.0363547	0.133845	0.152479	0.0681513	-0.0601949	0.231358	0.00576215	0.28545	0.177351	0.248621	0.0910248	0.309544	0.0383139	0.249894	0.171331	0.0769413	0.325161	-0.0867695	0.184089	-0.149728	0.183048	0.159316	0.0650972	0.315296	0.0795099	0.345897	0.236391	0.0306698	-0.042655	0.192322	-0.00937625	0.155514	0.0459236	0.136135	0.0608922	0.222311	0.0423617	0.0363765
REACTOME_GLYCOGEN_SYNTHESIS	-0.375867	0.0235079	-0.348886	-0.0154789	0.277997	-0.00496382	-0.120454	0.224596	0.0412468	-0.618387	-0.401128	-0.319113	0.457148	-0.39033	-0.0260005	-0.266782	0.482434	-0.494447	0.191343	-0.371153	-0.231999	0.354433	0.166609	0.363143	-0.147661	-0.653864	0.113008	0.419739	0.119638	0.187264	-0.300768	0.222322	-0.381632	-0.152095	-0.457136	-0.196068	-0.0175322	0.378999	-0.0229807	0.419217	0.436398	0.412295	0.406252	0.330561	-0.447842	-0.473572	-0.058565	-0.10389	-0.309412
REACTOME_REGULATION_OF_HSF1_MEDIATED_HEAT_SHOCK_RESPONSE	-0.053372	-0.24585	0.0453207	-0.0547778	0.167238	-0.0923732	-0.134847	-0.127033	0.00342842	0.0864154	-0.251417	-0.0762968	-0.176715	0.0835281	0.130111	-0.197811	0.0565891	-0.0492633	0.057127	-0.0653016	-0.092354	-0.160228	0.159814	0.0132537	0.116888	0.0131749	-0.151328	0.111123	0.0593344	-0.0912575	-0.115024	0.170085	0.0957645	0.0443916	0.179685	-0.0510403	0.0299459	0.00791813	0.0789101	-0.0747509	0.124743	0.0789306	0.118089	-0.0382337	-0.159037	-0.203068	-0.115033	0.113684	-0.181021
REACTOME_HSP90_CHAPERONE_CYCLE_FOR_STEROID_HORMONE_RECEPTORS_SHR_	0.429138	0.157563	-0.285174	0.215605	-0.266912	-0.221595	-0.0756982	0.20162	-0.194131	-0.259514	-0.4348	-0.0346755	-0.256187	-0.363981	-0.11869	-0.322806	-0.372439	-0.0423564	-0.180274	-0.0317332	-0.0668961	0.0689437	-0.0561074	-0.130614	0.332312	-0.208305	-0.227323	-0.137792	0.352914	-0.292668	-0.21755	0.142483	-0.425281	0.223506	0.0455296	-0.372705	-0.0628483	-0.363351	0.376588	0.162335	0.0696461	0.078054	0.0227292	0.0557834	0.0628597	-0.237162	-0.383393	0.00900774	-0.25498
REACTOME_HSF1_ACTIVATION	-0.214772	-0.0600722	-0.0451614	-0.0530753	0.263694	-0.333321	-0.42861	-0.139056	-0.00967748	0.18942	-0.446258	-0.377415	-0.223112	0.163596	0.349058	-0.369787	-0.372616	-0.0993427	-0.0704238	-0.337704	-0.366758	-0.34463	-0.286434	0.0313062	-0.31827	-0.322586	-0.0158901	-0.1871	0.256	-0.313624	-0.0869823	-0.0235582	-0.186695	-0.08286	-0.080112	-0.241557	-0.143423	-0.167763	0.0922673	-0.141762	-0.152147	-0.0142451	-0.276763	-0.105581	-0.496746	-0.3357	-0.42136	0.157482	-0.344717
REACTOME_CELLULAR_RESPONSE_TO_HEAT_STRESS	-0.0624535	-0.156677	0.0166926	-0.0120114	0.156604	-0.0836827	-0.13679	-0.050274	0.033072	0.0814416	-0.157259	-0.132302	-0.160496	-0.004661	0.0942972	-0.190763	-0.0935211	-0.0481165	-0.0343569	-0.129708	-0.110937	-0.181846	0.0747586	-0.0440405	0.0212725	-0.0299195	-0.145651	0.0268988	-0.00336279	-0.111551	-0.0928032	0.115159	0.0396363	0.00289348	0.112802	-0.0432606	-0.000624328	-0.0283498	0.0486838	-0.0742725	0.0607781	-0.00641211	0.0482043	-0.0626831	-0.220025	-0.220874	-0.165564	0.0287854	-0.189603
REACTOME_ATTENUATION_PHASE	0.128398	-0.0774835	-0.0228839	0.03695	0.233001	-0.313457	-0.476072	-0.254832	0.0596352	0.0978395	-0.471094	-0.2521	-0.506508	0.0382635	0.198192	-0.399355	-0.256784	0.0395926	0.0980897	-0.410686	-0.355004	-0.225603	-0.0499953	0.211919	0.108235	-0.381617	-0.147455	0.0421105	0.477014	-0.405256	0.0635362	0.244301	-0.160131	0.144447	0.188667	-0.103647	0.0552473	-0.292329	0.21682	0.0135634	0.268636	0.246104	-0.12298	-0.0890835	-0.499148	-0.279119	-0.472825	0.338942	-0.363296
REACTOME_HSF1_DEPENDENT_TRANSACTIVATION	0.082485	-0.00211916	-0.0392481	0.122769	0.227255	-0.108505	-0.285748	-0.0563089	0.230601	0.186468	-0.269911	-0.239573	-0.447969	-0.0922346	0.027714	-0.350526	-0.212314	-0.0338968	-0.0378726	-0.399885	-0.361856	-0.197769	-0.0829957	0.0597458	0.0578663	-0.33704	-0.255537	0.0373076	0.288197	-0.383687	-0.0233395	0.182363	-0.0874011	0.165134	0.119721	-0.0799253	0.0968721	-0.176529	0.125414	-0.0198863	0.147912	0.189766	-0.0677294	-0.0847697	-0.467509	-0.297467	-0.389236	0.171545	-0.306973
REACTOME_METABOLISM_OF_POLYAMINES	-0.268211	-0.123501	-0.280106	-0.144188	-0.0616039	-0.182794	-0.116643	-0.205512	-0.0817613	-0.0352076	-0.00985911	0.12555	-0.210884	-0.060758	0.366143	-0.0720738	0.123188	0.0276269	-0.0169441	0.0324443	0.0124555	0.196646	-0.105793	-0.0211457	0.0922534	-0.0576464	0.0233202	0.273055	0.0555748	-0.336356	0.135378	0.147327	-0.158994	0.105159	0.0469621	-0.184901	0.0863178	-0.00104274	-0.179639	-0.0814154	0.166606	0.075721	-0.152316	-0.00969221	-0.0267548	-0.069586	0.0656627	0.0360002	-0.0166378
REACTOME_APOPTOTIC_CLEAVAGE_OF_CELL_ADHESION_PROTEINS	-0.359293	-0.331374	0.357669	-0.424524	0.395031	-0.374532	-0.0841443	0.420127	-0.482744	0.0217703	-0.459485	-0.0436821	0.0545181	-0.104003	0.188758	-0.068539	-0.228538	0.263201	-0.511803	-0.271103	0.239514	-0.109171	0.286246	0.00380518	0.0204977	-0.304216	-0.0916904	-0.107985	-0.0549137	-0.00257263	-0.163686	0.00766762	0.179688	-0.108757	0.0721262	0.0203147	-0.0208355	-0.221215	0.112754	-0.399838	-0.241194	-0.555417	-0.0136175	-0.515111	0.0708322	0.14644	-0.223423	-0.140016	-0.382964
REACTOME_INTEGRIN_SIGNALING	0.197297	0.0292824	0.208756	-0.318994	0.355033	0.00117544	-0.344892	-0.133102	-0.628695	-0.117067	0.0106178	-0.293256	-0.131598	0.0266736	-0.23848	-0.367692	-0.283292	-0.0703146	-0.260643	-0.0211745	-0.337326	-0.494771	0.277205	-0.0503072	-0.571443	-0.484538	0.171777	-0.376995	-0.279354	-0.330918	0.159567	-0.289006	-0.379606	-0.156385	-0.00359549	-0.252364	0.0237298	-0.187947	0.374694	0.219147	-0.0856828	0.26336	-0.0224075	0.332272	0.215498	-0.0542611	-0.154571	0.24511	-0.0246273
REACTOME_GRB2_SOS_PROVIDES_LINKAGE_TO_MAPK_SIGNALING_FOR_INTEGRINS_	0.412185	0.084551	0.0651687	-0.438338	0.446699	0.118703	-0.367088	-0.112193	-0.615574	-0.092202	-0.0134846	-0.373796	-0.18031	0.11402	-0.469152	-0.462091	-0.310649	-0.12144	-0.238418	-0.0639851	-0.413018	-0.59099	0.447325	-0.0282908	-0.661518	-0.566429	0.132861	-0.320483	-0.386614	-0.404358	0.0578252	-0.342774	-0.382053	-0.178883	-0.19718	-0.382362	0.208689	-0.379964	0.553836	0.229204	-0.113099	0.30286	0.156926	0.348165	0.381636	-0.0733236	-0.253233	0.211526	-0.0271057
REACTOME_DISEASES_ASSOCIATED_WITH_GLYCOSAMINOGLYCAN_METABOLISM	-0.405746	0.00393106	-0.0297659	-0.00626484	-0.0131587	-0.0535882	-0.0751463	-0.0392676	-0.199414	-0.192312	-0.128993	-0.277008	-0.142543	-0.0733673	-0.247604	0.0734563	-0.283115	-0.153045	-0.126224	-0.246015	-0.0987148	-0.0426126	-0.0839937	0.0866454	-0.0674627	-0.117391	-0.218403	-0.243016	-0.00359693	-0.181325	0.0123186	-0.0700754	-0.361713	-0.118098	-0.00851499	-0.263588	-0.0422776	-0.142709	0.0870242	-0.259207	-0.396281	-0.262011	-0.0475244	-0.0326544	-0.230743	-0.284656	-0.24302	-0.124754	-0.402417
REACTOME_DEFECTIVE_B4GALT7_CAUSES_EDS_PROGEROID_TYPE	-0.374771	-0.387105	-0.286896	-0.340469	-0.101203	-0.3485	-0.430514	0.00925582	-0.283616	-0.107677	-0.119197	-0.18362	0.127501	0.0122795	0.197943	0.449235	-0.386403	-0.0722139	0.149266	-0.221156	-0.0653908	0.00788771	0.378981	0.262252	0.281269	0.0245624	0.00946493	-0.218292	0.180771	0.239019	0.361982	0.463797	-0.170256	-0.136317	0.0845986	-0.00679333	0.0741917	0.27059	0.0788684	0.082528	0.031114	0.137251	0.265273	0.121469	0.0044034	0.124114	-0.0868414	0.146113	-0.283027
REACTOME_TRANSCRIPTIONAL_REGULATION_BY_TP53	-0.0417372	0.102481	-0.0410957	0.116617	0.186912	0.0492315	0.0392794	0.101943	-0.0332177	-0.0370592	-0.0945109	-0.106898	-0.0102711	-0.0751157	-0.0942174	-0.106777	-0.0242937	-0.0387221	-0.091873	0.0242292	-0.103375	0.0575849	0.0282019	0.0754613	-0.0913695	0.0292804	-0.118668	0.0210537	-0.137498	0.0462647	-0.0995457	-0.0825423	0.0559635	-0.0218555	-0.13071	-0.111746	-0.133914	-0.106203	-0.0467844	0.0226964	0.0588984	0.054995	-0.0528731	-0.141749	-0.281072	-0.247884	-0.194086	-0.201657	-0.0256993
REACTOME_P130CAS_LINKAGE_TO_MAPK_SIGNALING_FOR_INTEGRINS	0.379761	-0.0523813	0.218151	-0.366438	0.417182	0.110137	-0.379728	-0.0928773	-0.646993	-0.175859	0.0854215	-0.351031	-0.173757	-0.0966639	-0.436778	-0.496368	-0.312841	-0.0720191	-0.333209	-0.172074	-0.367275	-0.548776	0.429529	0.00866573	-0.701055	-0.567915	0.174721	-0.414206	-0.451643	-0.287733	0.142102	-0.317889	-0.495967	-0.0995618	-0.281742	-0.353687	0.0424408	-0.212798	0.514654	0.287598	-0.0686047	0.291584	0.0850845	0.403735	0.318626	-0.162579	-0.282671	0.29262	-0.149656
REACTOME_SIGNALING_BY_GPCR	-0.184399	0.0749865	-0.0395988	-0.0222879	-0.204414	-0.157438	-0.0236103	-0.200434	-0.0534087	-0.0771392	-0.148094	0.0840655	-0.0268405	-0.0409185	0.0013706	-0.0286883	0.0897731	0.0626342	-0.0296118	0.032779	-0.0354636	-0.0654084	-0.0893823	0.104598	-0.150484	-0.00754188	-0.0687139	-0.0489266	-0.0280023	-0.137062	0.00915591	-0.0256216	0.128651	-0.218741	0.141615	-0.118167	0.0263397	-0.0574933	-0.127289	-0.114886	-0.136637	-0.0223505	0.0352795	0.121511	0.190098	-0.0772544	0.0372204	0.00499755	-0.102307
REACTOME_CLASS_A_1_RHODOPSIN_LIKE_RECEPTORS_	-0.0290047	-0.378543	-0.491279	-0.289966	-0.394297	-0.280354	-0.391391	-0.436239	-0.399245	-0.208332	-0.0977805	-0.0252823	-0.198648	-0.272958	-0.192919	-0.180709	0.0873552	0.251187	0.259498	0.176954	-0.391509	-0.294743	-0.496252	0.163459	-0.103409	-0.0299	-0.145939	-0.545186	0.13536	-0.329108	0.365612	0.308997	-0.0758071	-0.473076	-0.0964162	0.0161004	0.0620481	-0.215923	-0.372858	-0.295018	-0.465077	0.0465108	-0.303133	0.0888918	0.151288	-0.107181	-0.261238	-0.386703	0.0630099
REACTOME_CLASS_B_2_SECRETIN_FAMILY_RECEPTORS_	-0.106479	0.496614	-0.536283	0.0951988	-0.20953	-0.448891	0.0719564	-0.0338689	-0.258431	-0.09322	-0.475479	-0.271922	0.122188	-0.00969629	-0.132824	-0.0578888	0.141497	-0.126643	-0.00247349	0.139345	-0.212992	0.220003	0.240422	-0.277048	-0.289783	0.0507666	-0.0340224	0.138438	0.012144	-0.198643	0.302828	-0.148704	0.374917	-0.114678	0.332524	0.0346644	0.16301	0.288225	0.242552	0.0779606	0.0670116	0.284893	0.397873	0.345347	0.114367	0.296781	0.461716	0.276985	0.218918
REACTOME_NETRIN_1_SIGNALING	-0.167251	0.0665799	-0.206579	-0.172486	0.00858519	-0.172428	-0.0157361	0.22295	-0.0324694	-0.0806523	-0.240379	-0.241709	-0.0846412	0.25203	-0.00526675	-0.0993819	-0.161326	-0.31235	-0.188265	-0.205544	-0.134963	-0.165153	-0.16205	0.098651	-0.206392	-0.160615	-0.134065	-0.122286	-0.310105	-0.254757	-0.316911	-0.181746	0.0373811	0.0651229	-0.323293	-0.259458	-0.151817	-0.265346	-0.216314	-0.140261	-0.0355614	-0.139822	-0.262233	-0.276594	-0.00959269	-0.300721	-0.320454	-0.258721	-0.245552
REACTOME_NEPHRIN_FAMILY_INTERACTIONS	0.270349	0.05355	-0.291343	0.0468382	-0.171093	-0.188657	-0.198259	0.20502	-0.224855	-0.142806	0.247075	0.145163	0.00957946	0.0172122	0.194545	0.295097	0.0491671	0.247761	0.364974	0.209082	0.25301	-0.251808	-0.12131	0.163699	0.253846	-0.357844	0.34476	0.141188	-0.0776392	0.323732	-0.0600042	0.0518448	-0.119963	0.0116978	0.00678041	-0.106445	-0.3283	-0.383156	0.0784543	-0.105765	-0.2319	0.203546	-0.310211	-0.379894	-0.193549	-0.00753185	0.333588	0.137893	-0.0976234
REACTOME_SEMAPHORIN_INTERACTIONS	0.0167177	0.0473452	0.0576432	-0.220176	-0.155173	-0.311614	-0.249394	-0.35136	-0.112587	-0.262021	-0.277117	0.0488711	0.0924619	-0.244021	-0.126188	-0.128179	-0.338837	-0.30212	-0.246457	-0.242768	-0.226812	-0.153848	-0.319854	-0.258299	-0.13052	-0.191696	-0.364647	0.175486	-0.180934	-0.126859	0.00121804	-0.0656597	0.112777	0.177507	0.19089	-0.191775	-0.133899	-0.258916	0.278392	-0.0389056	-0.228791	0.0475241	-0.160028	-0.240891	-0.213476	0.0239671	-0.200967	0.135749	0.221861
REACTOME_L1CAM_INTERACTIONS	0.249626	0.0564303	-0.183227	-0.103101	-0.233786	-0.147469	-0.185283	-0.172712	-0.100332	-0.195405	-0.1043	-0.0151449	-0.0335225	-0.178569	-0.120458	-0.0805603	-0.121848	-0.132216	-0.331734	0.0275959	-0.0614917	-0.271602	-0.0234197	-0.205086	0.0861208	-0.194446	-0.150266	-0.245713	0.0969639	-0.253139	-0.0567007	0.179234	-0.174934	-0.168949	-0.0982586	-0.0335428	0.0613305	-0.31173	0.162019	-0.0490714	-0.18866	0.168053	0.100672	0.0268556	-0.00345776	-0.187511	-0.258519	0.162258	-0.139536
REACTOME_NCAM_SIGNALING_FOR_NEURITE_OUT_GROWTH	-0.314101	0.0757687	-0.0470345	-0.0103015	-0.00509624	0.0411908	0.00355495	-0.164638	0.104814	0.271035	-0.0541966	0.0924082	0.0676691	0.132471	0.213594	0.386162	0.141338	0.22634	-0.0736088	-0.197287	-0.121498	-0.365877	-0.00351581	-0.118236	-0.000269094	0.105334	0.0152269	-0.187773	0.0576873	0.118751	0.364187	0.287089	0.158163	-0.216616	0.174567	0.241701	0.0460987	-0.0427132	-0.0367109	-0.183755	-0.110056	-0.0704888	0.0113323	-0.0313227	-0.0647595	-0.109962	-0.0185104	0.187332	0.222551
REACTOME_PEPTIDE_LIGAND_BINDING_RECEPTORS	-0.0189665	-0.362979	-0.499644	-0.270752	-0.37984	-0.240535	-0.396848	-0.441621	-0.386009	-0.17033	-0.0418017	0.0290096	-0.176461	-0.245901	-0.159605	-0.13885	0.115869	0.327642	0.343148	0.206984	-0.387226	-0.319619	-0.499628	0.19701	-0.0592659	0.0274792	-0.10542	-0.59385	0.160197	-0.299632	0.42702	0.369714	-0.0248393	-0.532623	-0.0640375	0.080474	0.109253	-0.174124	-0.35199	-0.273739	-0.496792	0.104839	-0.278891	0.155345	0.225433	-0.0832384	-0.264424	-0.405823	0.0892576
REACTOME_SIGNALING_BY_ROBO_RECEPTORS	-0.146595	0.0150048	-0.0999968	-0.0146061	0.0878298	0.0244418	0.02307	0.0475193	-0.0118851	-0.0235426	-0.00238212	0.0756104	0.0305148	-0.00059056	0.148302	-0.018772	0.0121847	-0.0831022	0.0798251	-0.0240788	-0.00227642	0.290783	0.100762	0.0391856	0.0982219	0.0783507	0.103145	0.211256	0.0686697	-0.0365447	0.0352157	0.197295	-0.188817	0.130698	0.117509	0.0206422	0.0617807	0.102113	0.00362603	0.0483083	0.169743	-0.0192227	0.0459431	0.0645853	0.0277383	-0.0665177	0.0110066	-0.00919704	-0.0490737
REACTOME_DEACTIVATION_OF_THE_BETA_CATENIN_TRANSACTIVATING_COMPLEX	-0.282422	0.286148	0.0381287	0.371706	0.1446	0.36343	0.372993	0.477482	-0.123521	-0.320781	-0.480356	0.0782756	0.51907	-0.093762	0.430803	-0.239866	0.569943	0.0809057	0.181836	0.388074	-0.311838	0.532003	0.488193	0.328182	0.00247666	-0.527523	-0.0350778	0.612849	0.213616	0.337198	-0.251784	0.315381	-0.125431	0.201953	-0.260553	0.457707	0.233512	0.371995	0.454593	0.504142	0.603669	0.451064	0.314081	0.0301864	-0.1884	-0.40894	0.370868	-0.0158984	-0.440404
REACTOME_DISEASES_OF_GLYCOSYLATION	-0.138068	0.0453647	0.155947	-0.0850901	-0.100454	-0.102525	-0.0284506	-0.0558615	-0.0137537	-0.0405108	-0.078517	-0.122163	-0.0798378	0.0451401	-0.0998013	0.112496	-0.157276	0.00669622	-0.0348671	-0.106084	-0.042699	-0.168062	-0.142154	0.0907487	-0.239154	-0.073652	-0.0478001	-0.181695	0.0525216	0.00181771	0.0803331	0.0440155	-0.0723009	0.0161824	0.0315274	-0.0438087	0.0422079	0.0654759	0.0746316	-0.0773499	-0.128066	-0.21034	-0.0848392	0.0796823	-0.00112185	0.0314231	-0.15361	0.0161114	-0.177057
REACTOME_CYTOSOLIC_TRNA_AMINOACYLATION	-0.357693	-0.161561	0.00950705	0.168211	-0.267016	0.219876	0.0583598	0.14088	-0.161675	-0.17188	-0.00348574	-0.00450779	-0.0418969	0.0632834	-0.0230551	-0.271369	0.2561	0.0576687	-0.134169	-0.318733	-0.102947	0.268169	-0.149957	0.194328	0.22953	-0.392141	-0.212172	0.302091	-0.295198	-0.134187	0.00211758	0.0308985	-0.156912	-0.252003	-0.105997	-0.267734	-0.444105	-0.317398	-0.310705	0.132514	-0.244202	-0.289152	-0.123046	-0.294468	-0.16051	-0.0356639	0.236395	-0.0458747	0.278491
REACTOME_TRNA_AMINOACYLATION	-0.285101	-0.171551	-0.131318	0.171634	-0.300549	0.205374	-0.000712392	-0.129537	-0.189734	-0.0820463	0.00558208	-0.0351352	0.00195094	0.204144	-0.0382046	-0.1543	0.137786	0.0393007	-0.115358	-0.237762	-0.083134	0.20586	-0.12544	0.0555717	0.198993	-0.252537	-0.0973969	0.251517	-0.256802	-0.129074	0.0304389	0.106085	0.00283642	-0.192341	-0.0668877	-0.0603348	-0.373855	-0.22585	-0.304005	0.0839325	-0.0761474	-0.295786	-0.0929671	-0.0129666	-0.190755	0.0541869	0.175221	0.0339244	0.211926
REACTOME_MITOCHONDRIAL_TRNA_AMINOACYLATION	-0.159927	-0.242099	-0.316993	-0.00480246	-0.20177	0.256241	-0.0546012	-0.417837	-0.277965	0.215255	-0.0814537	-0.277166	0.116612	0.440555	0.0362583	0.125438	0.062081	0.157625	-0.0492915	0.0666254	0.0855905	0.187719	0.0874073	-0.401614	0.280079	0.115963	0.0948781	0.057107	-0.129262	0.0753024	-0.0140033	0.284784	0.380044	0.11315	-0.0108421	0.316477	-0.239105	0.107581	-0.228538	0.166758	0.236302	-0.205595	0.119147	0.296788	-0.313792	0.0382968	0.321389	0.198553	0.249957
REACTOME_RECRUITMENT_OF_MITOTIC_CENTROSOME_PROTEINS_AND_COMPLEXES	0.262236	0.233819	-0.015505	0.153324	0.00675233	0.12687	0.143554	0.10663	0.0145565	-0.115846	-0.23649	0.155793	0.0962128	0.130946	0.16959	-0.155737	0.170963	-0.0266581	-0.238387	0.0538115	0.0652027	0.320487	0.0796374	0.0878315	0.345436	-0.116342	0.12824	-0.0274825	0.183226	-0.216448	-0.0328704	0.0496153	-0.00173913	0.101913	0.0577902	0.0802094	0.0184633	-0.0973233	0.109654	-0.0845549	0.192704	0.262273	-0.16252	0.193772	0.244655	0.339179	0.0850307	0.0874314	0.0476713
REACTOME_RECRUITMENT_OF_NUMA_TO_MITOTIC_CENTROSOMES	0.416391	0.350214	-0.174434	0.289417	-0.178046	0.0632084	0.21596	0.308236	-0.0200365	-0.222049	-0.233481	0.264171	-0.125129	-0.166139	-0.103566	-0.21799	-0.122735	-0.0100538	-0.354735	0.158387	0.199203	0.142911	0.109833	-0.127769	0.37932	-0.101256	0.0117402	-0.0863253	0.333999	-0.20091	-0.196707	0.0486672	-0.229746	0.140522	0.029585	-0.20541	-0.0458126	-0.234754	0.240293	0.0446937	-0.0601965	0.0890482	-0.0829203	0.178999	0.262887	0.0389539	-0.156287	0.172069	-0.0874889
REACTOME_ENERGY_DEPENDENT_REGULATION_OF_MTOR_BY_LKB1_AMPK	-0.434772	0.102967	-0.354867	-0.285386	-0.0652216	-0.197022	-0.223428	0.0684243	-0.0938587	-0.267281	-0.0169724	0.304081	0.24488	0.418066	0.115881	0.383998	0.0820062	0.204396	0.571264	0.222409	0.119109	0.352129	0.514723	0.395286	0.445287	0.358751	0.225191	0.528456	0.102157	0.204173	0.310736	0.312605	0.513489	0.499847	0.357986	0.400925	0.389745	0.367993	0.200298	0.220939	0.308274	0.169047	0.313761	0.12364	0.278477	0.160203	0.420773	0.157445	0.28919
REACTOME_PERK_REGULATES_GENE_EXPRESSION	0.0754468	-0.237463	-0.125513	-0.168586	-0.388549	-0.428867	-0.288859	-0.356132	-0.0463171	-0.414106	-0.249411	0.194796	0.0425146	0.217481	0.166383	0.489627	0.0626561	0.274303	0.161814	0.379365	0.234391	0.0518946	0.207716	0.0740814	0.104327	-0.0719055	0.341858	0.0738669	0.206847	0.246627	0.0703603	0.365181	0.235173	0.175468	0.246052	0.163148	0.307964	0.266725	0.0407565	0.231936	0.320721	0.225642	0.0172157	0.0335763	-0.139976	0.418104	0.441981	-0.116086	0.375492
REACTOME_IRE1ALPHA_ACTIVATES_CHAPERONES	0.167096	-0.0258411	-0.142117	-0.056374	0.162863	-0.00472932	0.271628	0.0841795	-0.026507	0.00995874	-0.300427	0.318793	0.000800795	0.240251	0.013841	0.158083	0.00533778	-0.0741753	-0.403977	-0.252123	-0.144175	-0.166646	0.160659	0.0753635	-0.287263	-0.00989752	0.0547056	-0.0530718	0.221293	0.0221416	0.0483448	-0.10816	0.109642	-0.0522499	0.362263	-0.0393985	0.0879275	-0.327787	-0.0228548	0.0630218	-0.177564	-0.258695	-0.0556081	-0.0984882	-0.342972	-0.110379	0.379984	-0.179998	-0.209767
REACTOME_UNFOLDED_PROTEIN_RESPONSE_UPR_	0.180577	-0.196771	-0.239898	-0.229011	0.0140409	-0.132799	0.095903	-0.0319247	-0.0738273	-0.183022	-0.241445	0.256039	0.0920603	0.248751	0.00264976	0.306779	-0.0230899	0.0535497	-0.241459	-0.0788149	0.0330687	-0.0482159	0.0522285	0.058704	-0.133538	-0.0290649	0.12147	0.0146444	0.231709	0.107754	0.0634405	0.0146248	0.0844367	-0.0262806	0.337623	0.0635698	0.0798344	-0.20978	-0.0178665	0.124053	-0.0412001	-0.0487224	-0.0484042	-0.110511	-0.30512	0.0270284	0.347077	-0.0995405	-0.000722926
REACTOME_TRANSCRIPTIONAL_REGULATION_OF_WHITE_ADIPOCYTE_DIFFERENTIATION	-0.00103088	0.353845	-0.0300388	-0.0972229	0.239256	0.122497	0.294248	0.0770738	-0.0529214	0.297684	0.175956	0.0669039	-0.26935	0.221437	-0.0357692	0.117135	-0.115085	-0.0253535	-0.0581142	-0.0771803	0.117991	0.214044	3.09082e-05	0.259766	0.138454	0.215909	0.00250569	0.0267094	0.32704	0.12555	0.10545	0.149773	0.00611018	-0.211621	0.136665	0.0570272	-0.0494056	-0.271006	-0.169397	-0.0628645	0.185745	-0.189537	-0.183307	-0.298511	0.0849501	0.10803	-0.404244	-0.111166	0.143905
REACTOME_REGULATION_OF_INSULIN_LIKE_GROWTH_FACTOR_IGF_TRANSPORT_AND_UPTAKE_BY_INSULIN_LIKE_GROWTH_FACTOR_BINDING_PROTEINS_IGFBPS_	-0.0728706	-0.0534161	0.0308035	-0.0207624	-0.210256	0.0839246	0.136473	-0.144556	0.0253189	0.107215	-0.0684368	0.145857	-0.185075	-0.100684	-0.0604919	0.00309787	0.152855	0.161006	-0.068195	0.15307	-0.108253	-0.379077	-0.195614	0.146209	-0.422057	-0.29407	0.322667	-0.481792	0.266937	-0.0700023	0.149291	-0.0480832	-0.138456	-0.362449	0.0228769	-0.0902782	0.0771603	-0.144873	-0.0212802	-0.13476	-0.403163	0.0784464	0.0224428	0.211006	0.155459	0.0341143	0.154874	-0.142366	0.0213249
REACTOME_GLUCAGON_LIKE_PEPTIDE_1_GLP1_REGULATES_INSULIN_SECRETION	0.0252829	0.335846	-0.164996	0.262221	0.314343	-0.34513	-0.223713	-0.0844222	-0.000985454	0.0921985	0.0989064	-0.14647	0.063597	-0.135948	-0.209734	-0.29913	-0.160718	-0.255456	0.0722683	0.144255	-0.142129	0.293278	0.182213	-0.21812	-0.0308219	-0.321894	-0.0927994	0.21973	-0.279632	-0.199725	0.144467	-0.257667	0.217303	-0.158544	-0.0382306	-0.0395921	0.0939772	0.144426	0.0117209	-0.103451	0.361243	0.0639653	0.113268	0.232569	0.155927	-0.0783457	0.27139	0.218652	-0.0274563
REACTOME_TRANSPORT_OF_SMALL_MOLECULES	-0.0568649	-0.0119666	-0.0760606	0.06976	0.0147855	-0.117655	0.0545986	-0.0654109	-0.0471225	0.0312009	-0.0177687	-0.0477829	-0.144197	-0.107695	0.0156653	-0.122809	0.0366088	-0.0177788	-0.181952	-0.0565934	-0.070044	0.14001	-0.0235871	0.0175092	0.00520326	-0.00849354	-0.0331426	0.115255	-0.0164723	-0.106064	-0.0646537	-0.107758	-0.133065	0.0211051	-0.0472369	-0.112509	0.0520726	0.0280134	0.0284122	-0.148672	0.00283815	-0.115489	-0.108234	-0.0881671	-0.102291	-0.0751168	-0.00781502	-0.0100488	-0.13148
REACTOME_ABC_FAMILY_PROTEINS_MEDIATED_TRANSPORT	-0.224151	0.023263	-0.160743	-0.0934868	0.113904	0.0424887	0.101968	0.0942018	0.120958	0.00760773	0.0511323	0.0222143	-0.0137312	-0.13586	0.260896	-0.0749983	0.0978512	0.00925908	-0.0763879	0.00885973	-0.0380617	0.233366	0.0621608	0.0645548	0.0307967	-0.124984	0.0376778	0.25419	0.054571	-0.124988	-0.0172603	0.0865224	-0.162455	0.0852479	0.0433682	-0.102512	0.217366	0.0957266	-0.143316	0.043633	0.187376	0.0374598	0.0219696	0.0263457	-0.120888	-0.0324491	0.0192398	0.0230148	-0.0135372
REACTOME_BETA_CATENIN_INDEPENDENT_WNT_SIGNALING	-0.135756	-0.0214929	-0.178101	-0.0963182	0.145185	-0.0293207	0.0809099	0.0303652	-0.0863269	-0.0245885	0.0197866	-0.018557	-0.126765	-0.0869796	0.144743	-0.234155	0.123319	-0.0727053	-0.0748306	0.0837454	-0.200208	0.0740593	0.0237616	-0.0300886	0.0665147	-0.21695	-0.0180778	0.261226	-0.069953	-0.179004	0.00291312	0.0932269	-0.163634	-0.152357	-0.0334195	-0.146399	-0.0363592	-0.0691988	-0.0461508	0.00742576	0.263834	0.120618	-0.0174478	0.026924	-0.171531	-0.167433	-0.0845243	-0.112157	-0.0878883
REACTOME_COSTIMULATION_BY_THE_CD28_FAMILY	-0.467201	0.109322	-0.276715	-0.204984	-0.0860818	-0.193007	-0.00716246	0.0904859	0.0671933	0.048564	-0.206671	0.218801	0.478621	0.435275	0.346951	0.383152	0.380493	0.068219	0.347307	0.162587	0.14071	0.29151	0.248255	0.317196	0.270046	0.393128	0.360575	0.258966	-0.104133	0.148092	0.0784557	0.218333	0.288568	0.251671	0.415712	0.19895	0.122064	0.021079	-0.00703588	0.124328	-0.0517017	0.143663	-0.0063775	0.11512	0.101992	-0.0328013	0.208281	0.202836	0.333019
REACTOME_CD28_CO_STIMULATION	-0.449724	0.284943	-0.243843	-0.199793	-0.0666869	0.00552486	0.0399999	0.176977	0.135835	0.141111	0.0955814	0.0476548	0.430831	0.382511	0.346501	0.198866	0.203195	-0.135204	0.292956	0.0659294	-0.0522909	0.268246	0.335809	0.244792	0.171294	0.28639	0.212898	0.207817	-0.195165	0.0388983	-0.140761	0.116394	0.0100122	0.282361	0.367171	-0.136023	0.185442	0.00216771	-0.209801	-0.00671061	-0.0160641	-0.102097	0.119964	-0.177729	-0.212083	-0.149471	0.130223	-0.0604653	0.280536
REACTOME_CTLA4_INHIBITORY_SIGNALING	-0.363081	-0.162718	-0.243144	-0.28953	-0.301761	-0.298404	-0.178507	-0.113063	-0.101743	-0.207704	-0.261993	-0.0907062	0.588858	0.536056	0.582049	0.455513	0.427476	0.09099	0.330458	0.0276144	0.207588	0.498549	0.396826	0.250036	0.231822	0.513132	0.304489	0.354829	-0.348857	0.195963	-0.0224457	-0.0144969	0.151543	0.28921	0.524339	0.187523	0.247597	0.15417	-0.170069	0.249449	0.199553	-0.0560378	0.0267671	0.344188	0.423611	0.177045	0.599566	0.431392	0.264197
REACTOME_GLYOXYLATE_METABOLISM_AND_GLYCINE_DEGRADATION	0.0784424	-0.276361	-0.120962	-0.100693	0.172217	-0.16924	-0.293291	-0.360857	-0.0965911	0.192905	-0.0492588	0.084394	-0.129891	-0.142187	-0.255611	0.110032	-0.038248	0.287166	0.144005	-0.0816569	0.270102	0.359642	0.0397326	0.414631	-0.0012927	-0.0768065	0.295865	0.324156	0.368004	0.0812861	0.0994847	0.169062	-0.128265	0.429499	0.241378	-0.0220119	0.317849	0.43868	-0.159953	0.426077	0.00712247	0.31733	0.0541219	-0.147068	-0.0918378	0.00536354	-0.105853	0.22424	-0.194422
REACTOME_SUMOYLATION_OF_TRANSCRIPTION_COFACTORS	0.220756	0.0639519	-0.042354	-0.445279	-0.0930414	-0.306934	-0.254139	-0.338971	-0.406266	-0.0498132	0.042293	-0.322053	-0.130635	-0.16185	0.225866	-0.174587	-0.116599	0.077768	-0.202789	-0.245199	0.141474	0.207965	0.0851196	0.240543	0.313871	0.312293	0.141876	0.302732	0.0263685	0.0421227	0.00615419	-0.0628491	0.112976	0.0794447	-0.24932	-0.015068	-0.0377439	0.0835217	0.0150682	-0.334158	0.21509	0.131693	0.203203	-0.197104	0.0638378	-0.349209	-0.0797547	-0.397258	-0.0697581
REACTOME_COOPERATION_OF_PREFOLDIN_AND_TRIC_CCT_IN_ACTIN_AND_TUBULIN_FOLDING	0.421981	0.352207	-0.402689	0.326567	-0.460531	-0.0739942	0.138615	0.223866	-0.271183	-0.317757	-0.186462	0.316362	-0.201112	-0.428142	-0.266429	-0.336396	-0.288646	0.193911	-0.382261	0.430489	0.410951	-0.0182285	-0.0448413	-0.0925314	0.402825	-0.0184625	0.0982411	-0.171705	0.473747	0.0966008	-0.0728576	0.179072	-0.445784	0.0307593	-0.123985	-0.302501	-0.00911685	-0.445484	0.360062	0.206322	-0.0768817	0.00901426	-0.0856776	0.125666	0.467755	-0.213121	-0.380068	0.320801	0.32535
REACTOME_FORMATION_OF_TUBULIN_FOLDING_INTERMEDIATES_BY_CCT_TRIC	0.404393	0.390702	-0.444919	0.303513	-0.498732	-0.0673261	0.196801	0.274081	-0.342806	-0.407668	-0.251459	0.2339	-0.23164	-0.473742	-0.27445	-0.407745	-0.447338	0.0691043	-0.494179	0.416744	0.464117	-0.0636388	-0.086631	-0.147138	0.342503	-0.0352785	0.100498	-0.244587	0.488537	0.0843138	-0.143588	0.0353117	-0.508803	0.00812644	-0.235404	-0.394779	-0.187448	-0.524737	0.324895	0.119775	-0.206209	-0.200027	-0.224593	0.06129	0.329919	-0.290404	-0.49031	0.336662	0.326517
REACTOME_POST_CHAPERONIN_TUBULIN_FOLDING_PATHWAY	0.494624	0.458639	-0.483211	0.337026	-0.574284	-0.155045	0.222894	0.353814	-0.150582	-0.396292	-0.40891	0.500917	-0.414232	-0.557568	-0.446748	-0.304432	-0.459398	0.136463	-0.462765	0.247135	0.353278	-0.135292	-0.101015	-0.308226	0.482591	0.0671297	0.170492	-0.0836278	0.556932	-0.186554	-0.406379	-0.0474104	-0.588231	0.0989611	-0.0419043	-0.496553	0.0852201	-0.521618	0.409811	0.315128	-0.156615	0.116681	-0.117966	0.192303	0.4458	-0.217279	-0.474332	0.306078	-0.162922
REACTOME_FOLDING_OF_ACTIN_BY_CCT_TRIC	-0.030866	-0.0096813	-0.098826	-0.0552114	-0.231183	0.0336038	-0.0907069	-0.248278	-0.315105	-0.0588762	0.138632	-0.049331	-0.218247	-0.369299	0.0911072	-0.484872	0.232962	-0.263508	-0.490528	0.416929	0.268383	-0.104414	-0.486057	0.141347	-0.378994	-0.128767	-0.0606961	-0.441271	0.178468	0.125864	0.122929	0.157071	-0.0184107	-0.377938	0.0712217	0.0518399	-0.100478	-0.418296	0.153308	-0.174319	-0.0829958	-0.0519927	-0.398071	-0.171581	0.0422655	-0.425711	-0.0876103	0.137296	0.527184
REACTOME_ASSOCIATION_OF_TRIC_CCT_WITH_TARGET_PROTEINS_DURING_BIOSYNTHESIS	-0.185403	0.164125	0.207328	0.417806	-0.272301	0.0919628	0.0692863	-0.0420591	0.11742	0.0882804	0.0742925	-0.159212	0.131734	-0.166031	-0.00454126	-0.24216	0.0755965	-0.147142	-0.326708	-0.0874392	0.135348	0.00568594	-0.247296	-0.0114823	-0.126216	0.132834	-0.026042	-0.149176	-0.00229173	0.178683	-0.178086	-0.0706155	0.121332	-0.0921303	-0.161558	-0.0584375	0.0502005	-0.246906	-0.132749	-0.240087	-0.113469	-0.118358	-0.37886	-0.175132	-0.110122	-0.215783	-0.0567361	0.11457	0.410742
REACTOME_STRIATED_MUSCLE_CONTRACTION	0.341793	-0.47693	-0.121365	0.0370503	0.192781	0.0594954	0.106534	0.223146	0.0263024	-0.0801126	-0.357401	0.23256	-0.283946	-0.0473969	-0.422888	-0.090262	-0.00922034	-0.18119	-0.150072	-0.356079	-0.370336	-0.323128	-0.330739	-0.283137	-0.230065	-0.465909	-0.217075	-0.262062	-0.078102	0.119257	-0.486769	-0.40724	-0.211178	-0.450549	-0.0948607	-0.431354	-0.23949	0.0481958	0.0864275	0.0327068	-0.274371	0.325065	-0.0869779	0.109264	-0.322271	-0.278956	0.254809	-0.0918296	-0.427587
REACTOME_DISEASES_ASSOCIATED_WITH_O_GLYCOSYLATION_OF_PROTEINS	0.0239738	0.37851	0.344276	0.0860481	-0.0788032	-0.0677948	0.0630683	0.0800175	0.360149	0.285291	0.0103842	-0.0476085	-0.23143	0.189229	-0.0277709	0.0812012	-0.288237	0.0977933	-0.0298476	-0.0467134	0.0182823	-0.268889	0.0459061	-0.00566888	-0.302116	-0.0464141	0.244288	-0.13283	0.236268	0.373051	0.472787	0.362533	0.374958	0.110624	0.072295	0.198894	0.123417	0.320445	0.236297	0.278648	0.206016	-0.271446	-0.180113	0.167961	0.00640389	0.0224597	-0.0633421	0.0754318	0.0616721
REACTOME_PEROXISOMAL_LIPID_METABOLISM	-0.316126	-0.323292	-0.0279428	-0.0761308	-0.248054	-0.200922	-0.284447	-0.151312	0.0673399	0.00965535	-0.0259201	-0.08084	-0.135583	0.0277154	-0.27484	-0.265262	-0.327027	-0.14657	-0.278173	-0.48203	-0.136107	0.0749913	-0.191827	-0.478225	-0.0813522	-0.205129	-0.336816	-0.0805315	-0.166128	0.0919982	-0.169415	-0.0665156	-0.234608	-0.0225973	0.00266005	-0.261792	-0.155853	-0.128451	-0.167139	-0.40327	-0.108971	-0.403305	-0.218125	-0.37267	-0.419123	-0.267617	-0.284598	-0.135874	-0.112375
REACTOME_SIGNAL_REGULATORY_PROTEIN_FAMILY_INTERACTIONS	-0.171361	-0.159241	-0.156977	-0.374328	-0.317933	-0.271628	-0.0335088	0.0476272	0.159222	0.352083	0.291788	-0.387455	0.225369	0.273566	-0.0609926	0.469062	0.41445	-0.221283	0.158495	-0.023852	0.192802	-0.0565068	0.0989294	0.216988	-0.12267	0.0241931	0.0619728	0.121327	-0.368406	0.129804	-0.410315	-0.280118	0.37028	0.270988	-0.102008	-0.346642	0.105974	-0.281785	0.158422	0.121249	0.346653	-0.00470332	-0.00495154	0.462907	0.594887	-0.251734	-0.00882915	0.310601	-0.0630077
REACTOME_PROTEIN_FOLDING	0.0996605	0.237315	-0.294564	0.211443	-0.323331	-0.152582	0.00116558	0.0220093	-0.129071	-0.081966	-0.159891	0.239867	-0.0448678	-0.352453	-0.0290711	-0.161825	-0.00583257	0.19462	-0.290974	0.269185	0.234203	0.0759146	-0.0423128	-0.160573	0.241291	0.0866855	-0.0529928	0.134613	0.284007	-0.0629774	-0.179515	-0.0498224	-0.150653	-0.0682325	0.0750018	-0.159063	0.0724451	-0.281606	0.0578938	0.0801404	0.0281572	0.0687401	-0.0771894	0.133609	0.224086	-0.07531	-0.0617714	0.236781	0.0556735
REACTOME_ADP_SIGNALLING_THROUGH_P2Y_PURINOCEPTOR_12	-0.406617	0.299154	-0.510292	-0.217795	0.354107	-0.207891	-0.137314	-0.0865278	-0.26453	0.0503529	0.0433494	0.149146	0.346865	-0.238799	0.451703	0.232071	0.461471	0.507461	0.0110681	0.499628	0.164027	0.387942	0.214394	-0.147185	-0.141762	-0.102544	-0.127041	0.643387	-0.0131325	0.022845	0.172416	-0.248163	-0.0258612	-0.111976	0.481477	0.105489	0.216669	0.163709	0.0373045	0.150388	0.191902	0.0681678	0.504663	0.406914	-0.0121772	0.277915	0.540108	0.483445	0.231768
REACTOME_SIGNAL_AMPLIFICATION	-0.438809	0.126356	-0.415041	-0.193802	0.311489	0.0742439	-0.0755813	0.17902	-0.0945067	0.143558	0.0619514	0.193122	0.312916	0.140103	0.418327	0.139287	0.423971	0.479797	-0.0175682	0.402437	0.401509	0.37323	0.254992	-0.162931	-0.227657	0.205841	-0.203104	0.474448	0.172638	0.0405678	0.076742	-0.146836	0.201835	-0.0808656	0.355136	-0.0692536	0.338769	0.0233994	-0.00266924	0.21579	0.194059	0.315785	0.208872	0.456818	0.0673925	0.0443607	0.318377	0.240538	0.154583
REACTOME_EPHB_MEDIATED_FORWARD_SIGNALING	-0.0110836	-0.225302	-0.339038	-0.318513	-0.141432	-0.355425	-0.0432739	-0.121396	-0.218267	-0.204686	-0.324284	0.0783978	0.115043	-0.084912	-0.0671706	-0.0544166	0.258525	-0.0384828	0.0270022	0.320801	-0.071657	-0.0670763	-0.156503	0.0321242	0.134594	-0.0687848	-0.193396	0.014142	-0.119616	-0.373687	-0.0778545	0.310824	0.275545	-0.0755858	0.154455	-0.185046	0.252984	-0.178372	0.229636	0.169505	0.0608818	0.0490313	-0.00852031	-0.234736	0.0285218	-0.105035	-0.204081	-0.174911	0.0946089
REACTOME_EPHA_MEDIATED_GROWTH_CONE_COLLAPSE	0.331169	0.212917	0.365337	-0.0966124	-0.213841	-0.0679998	0.0296388	-0.304591	0.374551	-0.0882495	-0.0592645	-0.0523167	0.462632	-0.157782	0.0428699	-0.430505	-0.101238	-0.191138	-0.388375	-0.284761	-0.0517095	-0.28846	-0.192073	-0.0814471	-0.37744	-0.00153288	-0.39844	-0.0278758	-0.0405483	-0.418029	-0.363623	-0.125507	0.138657	0.0333867	0.287114	-0.392509	0.391388	-0.370582	0.165374	-0.146834	-0.201029	-0.117135	-0.128418	-0.109857	-0.0120907	-0.309395	0.115941	0.429301	0.256008
REACTOME_EPHRIN_SIGNALING	-0.0619533	0.119941	-0.137348	-0.367306	-0.0336533	-0.233456	-0.142845	-0.14811	0.241989	-0.282117	-0.137051	0.0653313	0.297043	0.332387	0.308215	-0.164503	0.259267	-0.16924	0.18824	0.187357	0.269883	0.344038	0.0755763	0.399051	0.251749	0.301879	0.391482	0.376638	0.0371668	0.122203	0.146994	0.338472	0.415571	0.403506	0.455632	0.0727884	0.0602283	-0.104649	0.315817	0.412258	-0.057409	0.147213	0.521002	-0.16089	0.124605	-0.198122	-0.140487	0.254976	0.126154
REACTOME_EPH_EPHRIN_MEDIATED_REPULSION_OF_CELLS	0.108184	-0.152837	-0.311059	-0.263439	-0.0134826	-0.0598924	-0.102925	-0.0916544	0.149536	0.181993	0.155168	0.0632846	0.16954	0.236881	-0.100544	0.108776	0.175026	-0.108704	-0.185258	0.252552	-0.17545	-0.252612	0.0756775	-0.0526314	0.0438211	-0.0142315	0.00580822	0.0231697	0.0119951	-0.132516	-0.029584	0.0472956	0.05693	-0.142598	0.0562084	0.188558	0.320093	-0.0610263	-0.0683831	-0.0672849	-0.0175197	0.216382	0.113425	0.0130256	0.182691	0.099996	-0.143174	-0.0657938	0.215103
REACTOME_MUSCLE_CONTRACTION	0.296121	-0.301029	-0.0598959	-0.241558	-0.202322	-0.0775705	0.00545703	-0.183884	-0.0166908	0.0410275	-0.294348	0.026511	-0.228113	-0.197309	-0.265191	-0.01688	-0.0882127	-0.0483262	-0.390256	-0.0879547	-0.16563	-0.180926	-0.349966	-0.224236	-0.0184175	-0.179245	-0.269538	0.0205755	-0.115489	-0.0720928	-0.243254	-0.0709024	-0.220298	-0.138232	-0.097237	-0.332448	-0.167316	-0.110593	0.0848051	-0.0197856	-0.301532	0.126092	-0.0878635	-0.183566	-0.269693	-0.296801	0.102142	-0.0865999	-0.316611
REACTOME_G_PROTEIN_BETA_GAMMA_SIGNALLING	-0.0179099	0.451238	-0.0102639	0.0614237	0.248029	0.0162168	0.472004	0.132495	0.294785	0.409985	0.232492	0.32273	0.593653	0.336154	0.421293	0.324307	0.328712	0.226789	0.339453	0.412255	0.144584	0.480976	0.475033	0.220846	0.206835	0.106645	0.185881	0.476653	0.287498	0.150444	0.398364	0.242576	0.157305	0.236138	0.411452	0.470398	0.425887	0.293426	0.316966	0.347561	0.439613	0.499212	0.425177	0.376614	0.167017	0.412942	0.531551	0.343516	0.519832
REACTOME_TRAFFICKING_OF_AMPA_RECEPTORS	-0.104814	-0.290185	0.00396509	-0.0247597	-0.000358651	0.35796	-0.0432534	-0.197964	0.236622	0.261998	0.226742	-0.0537365	-0.170684	0.202422	0.140051	0.160453	-0.305777	0.00221564	-0.128878	0.190919	-0.25521	-0.164826	0.173792	-0.192223	0.120679	0.00603647	0.00695914	-0.0849107	-0.0780946	-0.105974	0.153941	0.176831	-0.0571762	0.0109211	-0.255767	-0.0339204	0.164364	-0.22418	0.0190603	-0.10942	-0.14061	0.12828	-0.215682	-0.246001	-0.0602079	-0.0298285	-0.0224417	0.209356	0.0648979
REACTOME_SEMA3A_PAK_DEPENDENT_AXON_REPULSION	-0.0976971	-0.0639659	-0.315063	-0.32894	0.00310321	-0.378596	-0.467884	-0.234684	-0.36285	-0.259604	-0.256382	-0.0956973	-0.015734	0.37693	0.143859	-0.0646188	-0.148549	-0.142201	0.151287	0.293904	-0.0668911	0.253003	-0.476565	0.195059	0.062958	0.239884	0.120824	0.12703	0.187532	-0.170552	0.297778	0.347161	-0.112295	0.179868	0.407716	0.108405	-0.382632	-0.172806	0.237072	0.29449	0.201582	0.185539	-0.0226474	-0.242943	-0.393531	-0.148342	-0.57848	-0.162264	0.342736
REACTOME_CRMPS_IN_SEMA3A_SIGNALING	-0.279347	-0.350744	-0.388014	-0.63172	-0.193254	-0.502084	-0.210051	-0.489223	-0.37842	-0.259867	-0.42425	0.0524029	-0.129429	0.036208	-0.118519	0.125894	-0.188062	-0.170084	-0.264194	0.130515	-0.17624	0.28212	-0.0822629	-0.165375	-0.234576	-0.00792597	-0.245926	0.420928	-0.233438	-0.213276	0.232295	-0.132955	-0.000730437	0.279296	0.255707	-0.341943	-0.452693	-0.165021	-0.0638782	-0.266527	-0.0960094	-0.079239	-0.339028	-0.291096	-0.269838	0.291735	0.066914	0.0338431	0.299665
REACTOME_REGULATION_OF_LIPID_METABOLISM_BY_PPARALPHA	-0.106153	0.041013	-0.00957565	-0.142245	-0.0493949	0.0456998	0.0598633	-0.226165	0.00454678	0.275279	-0.173222	0.0536118	-0.182707	0.0889134	-0.250629	0.0459045	-0.0121027	0.0499972	0.0647814	0.028486	-0.00428341	-0.0539779	-0.0995319	0.0373149	-0.0578097	0.0903363	0.229209	-0.113713	-0.22204	0.154562	-0.140756	-0.0624032	0.121751	-0.160796	-0.133278	0.0155315	-0.0741305	-0.181318	-0.102587	-0.218432	-0.103721	-0.428389	-0.189731	0.0610123	0.0750222	-0.178799	-0.23405	0.0167243	-0.141192
REACTOME_CIRCADIAN_CLOCK	-0.267321	0.284545	-0.147668	0.315478	0.181339	-0.0572741	0.025221	-0.0752269	0.414613	-0.222268	-0.0339813	-0.313819	0.0786458	-0.251615	-0.21523	-0.466822	-0.192845	-0.576157	0.0134393	-0.43099	-0.384432	-0.036556	0.251746	-0.122364	0.202069	-0.466024	-0.375329	0.160615	-0.177902	0.218605	-0.197141	-0.169353	-0.293834	0.438108	-0.340001	0.164725	0.172381	-0.153148	0.165648	0.179001	0.223998	-0.0186349	0.331845	0.120715	-0.19562	-0.540324	0.0586959	-0.353066	-0.431728
REACTOME_SEMA4D_IN_SEMAPHORIN_SIGNALING	0.084036	0.197009	0.217504	-0.0969245	-0.0897673	-0.195301	-0.0575059	-0.445009	0.29298	-0.114812	-0.174639	-0.00465124	0.178846	-0.2803	-0.102911	-0.470279	-0.245484	-0.319517	-0.33864	-0.271058	-0.0609527	-0.478063	-0.255236	-0.209717	-0.333681	-0.166296	-0.32678	0.0587126	-0.00582355	-0.154561	-0.347973	0.0910973	0.111574	-0.156958	0.21031	-0.224682	0.148486	-0.358066	0.228226	-0.0281197	-0.389496	0.0273525	-0.0486084	-0.314493	-0.247571	-0.115839	-0.171112	0.327373	0.313898
REACTOME_SUMOYLATION_OF_SUMOYLATION_PROTEINS	-0.109305	-0.344618	0.136606	-0.128893	0.316756	-0.127321	-0.0386466	0.103939	-0.0087686	-0.0303072	-0.0449051	0.0376234	0.0813758	0.0777911	0.10716	-0.0889379	0.31928	0.0538363	0.314965	0.244818	0.227384	0.0956156	0.247656	0.122102	0.29159	0.216411	0.177342	0.349596	-0.0501813	0.275723	-0.197346	0.148	0.109059	0.00417015	0.33041	0.0991681	0.295531	0.259423	0.0924458	-0.097738	0.192467	0.0622464	0.181139	0.153002	0.17702	0.0265649	0.189033	0.0101273	0.0501561
REACTOME_CA2_PATHWAY	0.0642646	-0.0167714	-0.00400311	-0.0267952	0.0874096	-0.0408913	-0.0128431	0.114565	-0.299598	0.0059845	-0.115704	-0.0372494	0.0213922	-0.133449	-0.163988	-0.0884652	0.112641	0.13958	-0.116519	0.283686	-0.25318	0.0716085	0.0830083	-0.176213	-0.011868	-0.190633	-0.170459	0.267378	-0.289454	-0.0791677	-0.0381842	-0.203885	0.171218	-0.166134	0.0757482	-0.169952	-0.133758	-0.26414	-0.045019	-0.0930571	0.277812	-0.0799049	-0.0108023	-0.0582084	-0.068928	-0.19716	0.112167	-0.0371338	-0.137847
REACTOME_PCP_CE_PATHWAY	-0.203353	-0.0156034	-0.234168	-0.109752	0.13382	0.0140959	0.0686525	-0.0126602	0.0319593	-0.0538569	0.0473219	-0.0145708	-0.177932	-0.0729168	0.244338	-0.285242	0.116236	-0.168033	-0.051847	0.0251351	-0.184213	0.10759	0.0362789	0.0327714	0.127709	-0.222332	0.0534613	0.263272	0.0900252	-0.189705	0.0249102	0.234408	-0.287103	-0.098507	-0.0704727	-0.140991	0.0550844	0.0162571	-0.022821	0.0586224	0.231771	0.177563	-0.00576587	0.0422889	-0.199894	-0.175014	-0.162042	-0.128695	-0.0774175
REACTOME_G_ALPHA_Q_SIGNALLING_EVENTS	0.0635979	0.0562197	-0.0943023	0.018737	0.0117705	-0.0579376	0.0687583	-0.310873	-0.0145723	0.180243	0.124471	0.157275	0.181227	0.14082	0.0824809	0.129862	0.0960827	0.261168	0.03641	0.0540659	-0.0150992	0.0451808	0.0627009	0.230329	-0.0743825	0.173347	-0.0904473	-0.0895936	-0.00771527	-0.038235	0.155782	0.218342	0.235465	-0.139935	0.145798	0.106177	0.217586	0.0227711	-0.0176353	0.0988491	-0.0427481	0.299251	0.151569	0.345458	0.13147	-0.0521075	-0.0729656	0.0942203	0.119365
REACTOME_G_ALPHA_12_13_SIGNALLING_EVENTS	-0.196193	0.232439	-0.141555	0.167924	0.183725	-0.0355141	0.0256623	-0.0240042	-0.0475722	0.154023	0.155174	0.139697	0.353044	0.185955	0.219027	-0.00252912	0.0867535	0.136726	0.149083	0.152078	0.284852	0.413716	0.278934	0.140875	-0.0151515	0.232191	-0.0160281	0.476741	0.13109	0.171316	0.207111	0.0853295	0.318161	0.0737255	0.204666	0.18319	0.183908	0.0656913	0.140124	0.214105	0.31991	0.0515053	0.216385	0.13649	0.158704	0.365489	0.24553	0.360818	0.348925
REACTOME_SEMA4D_INDUCED_CELL_MIGRATION_AND_GROWTH_CONE_COLLAPSE	0.364405	0.307	0.461112	0.0721359	-0.184245	-0.162052	-0.0272737	-0.464534	0.329559	-0.152362	-0.236985	0.00590958	0.225352	-0.381212	-0.241414	-0.554253	-0.361923	-0.334564	-0.448874	-0.363734	-0.0960154	-0.468404	-0.344849	-0.27282	-0.43069	-0.223101	-0.465427	0.0295052	-0.0235866	-0.257092	-0.41134	-0.11435	0.101098	-0.263962	0.163115	-0.229523	0.318722	-0.39992	0.270346	-0.225203	-0.374807	-0.0848942	-0.23789	-0.251946	-0.0956665	-0.150815	0.0611806	0.446429	0.247368
REACTOME_TRAFFICKING_OF_GLUR2_CONTAINING_AMPA_RECEPTORS	0.140633	-0.0551921	0.268526	0.0995169	-0.115827	0.406983	-0.074978	-0.178663	0.246066	0.0277618	0.393204	0.0417581	-0.300858	0.00113864	0.140905	0.364229	-0.237052	-0.331454	-0.307989	0.235951	-0.285666	-0.343396	0.264158	-0.120372	0.196314	-0.119007	0.0455458	-0.20433	-0.131204	-0.119916	0.30621	0.0226588	-0.0955535	-0.231114	-0.391725	-0.126766	0.188123	-0.166232	0.146021	-0.180876	0.199823	0.141158	-0.059604	-0.0395731	-0.157455	-0.0606018	-0.304224	0.00901508	0.264052
REACTOME_PLATELET_HOMEOSTASIS	0.127245	0.0295247	-0.228623	-0.0106052	-0.00180617	-0.332001	0.0510665	0.0503308	-0.177922	0.15281	-0.0261727	-0.166939	0.00713663	-0.012192	0.212089	0.0138337	0.0757267	0.0550434	-0.042254	0.169185	-0.0534657	0.221244	-0.180768	0.0467179	0.0391158	0.30689	0.0909796	0.333215	0.0497181	0.0367946	0.0574162	-0.0549628	0.112788	-0.119136	0.00528373	-0.042726	-0.195533	-0.0675058	-0.190612	-0.0446497	-0.0465226	0.0870499	0.0120446	0.17983	0.0918861	0.066998	0.178266	0.0959718	-0.0230645
REACTOME_PLATELET_CALCIUM_HOMEOSTASIS	0.398823	-0.162037	0.0416865	-0.0815248	-0.250639	-0.327516	0.21774	0.0703772	-0.232636	0.249002	0.237338	-0.413561	-0.219195	-0.238626	0.151939	-0.0838602	-0.081708	0.0817905	-0.465091	0.379701	-0.0277682	-0.0215821	-0.56875	-0.0736872	-0.170346	0.241253	0.0596736	0.202977	-0.00932197	0.145073	0.02937	0.0487228	-0.259275	-0.242181	-0.340351	-0.280969	-0.47767	-0.262206	-0.256228	0.0405659	-0.180496	-0.0802357	-0.0612181	-0.00605625	-0.118687	-0.0360212	-0.117313	-0.229654	-0.0793925
REACTOME_G_ALPHA_S_SIGNALLING_EVENTS	-0.203522	0.258415	-0.353685	-0.172031	0.0780622	-0.39356	-0.309826	-0.150339	-0.407506	-0.122892	-0.275439	0.133604	0.25385	-0.248311	0.401786	0.04303	0.304757	0.272669	0.0376301	0.34296	0.19096	0.295218	-0.0367282	-0.170254	-0.0372206	-0.00758877	-0.247523	0.538082	0.0452401	-0.161731	-0.00730685	-0.177887	0.0273217	0.0928011	0.399252	-0.00233854	0.134535	0.0636614	-0.0777389	-0.00128141	0.140441	0.0483604	0.403713	0.341192	0.244646	0.101912	0.453215	0.416141	-0.0494
REACTOME_ADP_SIGNALLING_THROUGH_P2Y_PURINOCEPTOR_1	-0.334626	0.2039	-0.285496	-0.16869	0.41527	0.0893976	0.149997	0.0510613	0.220747	0.399695	0.17731	0.100715	0.365817	0.536679	0.441788	0.133195	0.427506	0.517833	0.159189	0.276072	0.415964	0.477165	0.495811	-0.0478903	-0.076564	0.213184	-0.0448669	0.354513	0.301471	0.0935986	0.355486	0.156352	0.545447	0.156143	0.357157	0.179676	0.503424	0.276333	0.271966	0.430197	0.313819	0.418865	0.147952	0.60969	0.177773	0.00147823	0.318455	0.271285	0.506335
REACTOME_G_ALPHA_I_SIGNALLING_EVENTS	-0.194809	0.0450412	-0.0420839	0.00615147	-0.209615	-0.168001	-0.0240214	-0.178922	0.0243637	-0.0892958	-0.169569	0.0770016	-0.103566	-0.15938	-0.0200374	-0.106637	0.125578	0.110182	-0.0307791	0.112952	-0.09764	-0.161439	-0.182542	0.0887011	-0.211855	-0.0993023	-0.0465551	-0.122047	-0.00235296	-0.209321	0.0219616	-0.0635516	0.0706357	-0.310593	0.181912	-0.162223	-0.0305292	-0.0823886	-0.188882	-0.234759	-0.215952	-0.149859	-0.00547039	0.0841209	0.271539	-0.104333	0.0440335	-0.0590553	-0.18838
REACTOME_G_ALPHA_Z_SIGNALLING_EVENTS	-0.354293	0.2859	-0.493979	-0.123742	0.347228	-0.31818	-0.283029	-0.0967863	-0.223238	-0.0624097	-0.128733	0.0362796	0.226833	-0.25508	0.344583	0.039927	0.301349	0.341055	0.0872572	0.431225	-0.00740632	0.3305	0.04307	-0.282962	-0.110734	-0.18597	-0.294139	0.613315	0.00931806	-0.12769	0.0749322	-0.255445	-0.0127583	-0.136451	0.389772	-0.0412161	-0.0266137	-0.0222383	-0.0846646	-0.0754152	0.108348	0.0821058	0.363939	0.229018	-0.032751	0.27084	0.437666	0.438617	0.0106196
REACTOME_DCC_MEDIATED_ATTRACTIVE_SIGNALING	-0.435916	0.15893	-0.297788	-0.281752	-0.0547443	-0.352778	-0.060879	0.286294	0.0680899	-0.193754	-0.0755036	-0.174522	0.166574	0.31482	0.179095	-0.24504	-0.0232235	-0.270366	0.0469339	-0.064688	0.0615409	0.299225	0.189307	0.266265	-0.0620244	-0.217146	-0.190639	0.0915145	-0.430406	-0.289077	-0.234363	-0.0605135	-0.280105	0.12154	0.0422746	-0.404069	-0.169461	-0.262979	-0.219046	-0.0510842	0.0541918	-0.0273586	0.0456558	-0.33444	-0.0798666	-0.317087	-0.543472	-0.142733	-0.0722983
REACTOME_ADHERENS_JUNCTIONS_INTERACTIONS	0.00243711	-0.135498	-0.106385	0.205453	-0.201365	-0.0939926	-0.0370007	-0.0779665	-0.250484	-0.0205432	-0.440682	0.37173	-0.313056	-0.209162	-0.309135	-0.0204209	0.18857	0.272946	-0.225759	0.166394	-0.40314	0.165524	0.15533	-0.355997	0.0635637	-0.40966	-0.204082	-0.175049	0.062629	-0.1817	-0.159591	0.123636	-0.0486411	-0.254771	0.115515	0.030931	-0.161666	-0.156043	0.301027	-0.00315196	0.096214	-0.0809127	-0.230666	-0.309475	-0.0786011	-0.198674	-0.128376	0.0888851	-0.135695
REACTOME_NCAM1_INTERACTIONS	0.0317998	0.0876492	-5.10588e-05	-0.152383	-0.181182	-0.210789	-0.0103511	-0.155761	-0.246196	0.287264	-0.32046	-0.0233888	-0.0117128	0.0150515	0.25611	0.45426	-0.027582	0.115141	-0.101501	-0.34412	-0.272968	-0.389051	-0.0321703	-0.065706	-0.35093	0.260136	0.115293	-0.395496	0.0719273	0.0504546	0.320405	0.175986	0.24016	-0.399365	0.170151	-0.0106101	0.169583	0.0845849	-0.226529	-0.152466	-0.409952	-0.290032	-0.15555	0.170131	0.137941	-0.0294562	-0.0250949	-0.0987562	0.187172
REACTOME_CELL_CELL_JUNCTION_ORGANIZATION	0.100759	-0.132042	-0.0208891	0.111187	-0.221981	-0.130426	-0.0070306	-0.116593	-0.0839831	0.0564699	-0.305845	0.206152	-0.303851	-0.193491	-0.235546	-0.00269817	0.0807776	0.160712	-0.139386	0.0619196	-0.339164	0.0755207	0.0969211	-0.298196	0.0573747	-0.32781	-0.168904	-0.185862	-0.0307827	-0.118637	-0.219526	-0.0093403	-0.0608238	-0.222146	-0.0395157	-0.0472408	-0.157388	-0.192235	0.164348	-0.0999626	0.0605711	-0.100124	-0.228396	-0.277345	-0.107082	-0.100123	-0.0871475	0.0877686	-0.12144
REACTOME_REGULATION_OF_INSULIN_SECRETION	-0.278677	0.0279056	-0.208168	-0.149143	0.0393882	-0.202923	-0.109894	-0.231302	-0.118484	0.0559416	-0.220898	-0.128833	0.0844509	-0.127095	0.0288734	-0.200878	0.0567581	-0.0292755	-0.0921485	0.0251867	-0.0655242	0.305211	-0.040833	-0.155161	-0.0539751	-0.210506	-0.134096	0.266864	-0.104973	-0.0496441	-0.0319548	-0.118095	0.0498615	-0.135032	0.032593	-0.108825	-0.0652556	-0.0597455	-0.114905	0.0593993	0.152191	0.119644	0.0262949	0.152868	0.0188075	-0.116759	0.0971748	0.0347276	-0.030482
REACTOME_TRANSPORT_OF_INORGANIC_CATIONS_ANIONS_AND_AMINO_ACIDS_OLIGOPEPTIDES	-0.04767	-0.439706	-0.370401	-0.388962	-0.162253	0.0612262	0.02946	0.136513	-0.265976	-0.339271	-0.201619	-0.37974	-0.11279	0.064438	-0.274465	-0.130058	0.0180345	0.092352	-0.430165	0.019677	-0.117372	-0.208388	-0.324512	-0.0691738	0.247499	-0.243867	-0.090438	-0.148441	0.0877664	-0.187048	0.0485324	0.0495609	-0.00567613	-0.000764888	-0.396142	-0.330887	-0.298392	-0.367056	-0.41721	-0.421644	-0.132957	-0.448167	-0.455742	-0.470218	-0.468743	-0.499089	-0.308836	-0.355462	-0.475469
REACTOME_TRANSPORT_OF_VITAMINS_NUCLEOSIDES_AND_RELATED_MOLECULES	-0.382442	0.0839455	-0.0821021	0.159613	0.279578	-0.109778	0.165247	0.129896	-0.0603195	-0.11128	-0.174205	0.116196	-0.424554	0.141774	0.205461	-0.38578	0.636521	0.115328	-0.188531	-0.175025	-0.334281	-0.439723	0.235023	0.232898	-0.310386	-0.0577383	-0.167351	-0.401187	-0.0787373	0.169714	-0.249992	-0.459139	-0.0638879	-0.228133	0.228087	-0.197636	0.235523	0.223423	0.463378	0.177572	-0.216268	0.00908488	0.185989	0.283934	0.403609	-0.0229893	0.154594	0.07175	0.170472
REACTOME_SLC_MEDIATED_TRANSMEMBRANE_TRANSPORT	-0.0992512	0.0395879	-0.0341568	0.0426768	0.103726	0.0453496	0.217119	0.031166	-0.0743927	-0.0718822	-0.114935	-0.240702	-0.206303	0.0116527	-0.0503678	-0.229846	0.210111	0.022381	-0.323441	-0.0146971	-0.15113	-0.276587	-0.131073	-0.0306834	-0.0646249	-0.117579	-0.0693689	-0.185716	-0.0330411	0.0242147	-0.0693701	-0.263599	-0.113045	-0.118021	-0.143126	-0.185013	-0.0284205	-0.27715	-0.0722668	-0.254694	-0.170235	-0.14936	-0.147533	-0.217843	-0.109828	-0.278556	-0.128287	-0.207442	-0.140431
REACTOME_SIRT1_NEGATIVELY_REGULATES_RRNA_EXPRESSION	0.425208	-0.502609	-0.351971	-0.410109	0.136972	-0.419732	0.0693936	-0.467464	-0.366388	-0.1225	0.640764	-0.615713	-0.0754839	-0.311035	-0.403259	0.17853	-0.00430503	-0.131886	0.395876	-0.536988	-0.205859	0.35682	-0.385129	-0.326115	0.286757	0.384416	-0.210734	-0.30243	-0.47141	0.13706	0.0473243	0.0669377	0.621084	-0.206555	-0.146761	0.346655	0.0732935	0.0758932	-0.505163	0.180835	-0.197434	-0.243256	-0.413291	0.45451	0.214251	-0.715378	0.206076	-0.467478	-0.0401791
REACTOME_ERCC6_CSB_AND_EHMT2_G9A_POSITIVELY_REGULATE_RRNA_EXPRESSION	0.287112	-0.315833	-0.233124	-0.320481	0.173526	-0.217699	0.16064	-0.255117	-0.205539	-0.0651462	0.534478	-0.548469	-0.150235	-0.288859	-0.376534	0.000899534	-0.0220723	-0.0640835	0.157115	-0.412449	-0.259387	0.224163	-0.289894	-0.166745	0.102849	0.276165	-0.196669	-0.212185	-0.403247	-0.0383838	-0.140426	-0.113338	0.446516	-0.204571	-0.185837	0.141351	-0.101546	-0.0826001	-0.395085	0.153768	-0.183043	-0.370972	-0.345812	0.167063	0.0964439	-0.633201	0.0378471	-0.389115	-0.0412332
REACTOME_SPHINGOLIPID_METABOLISM	0.225721	0.174472	0.077824	-0.189075	-0.165739	0.187322	0.211561	0.00349275	0.202194	0.177977	-0.00367382	0.0349945	-0.0077914	0.0240228	-0.0173818	-0.139644	-0.0166429	0.0361159	0.134017	-0.0106238	0.0711964	0.186006	0.137003	0.310435	-0.018284	0.129364	0.281038	0.0869702	-0.0431025	0.0543415	0.143465	0.0547548	-0.0491793	0.163979	0.191937	-0.00143604	0.246003	0.116115	0.0805144	0.0627446	0.1677	0.0518826	0.17768	0.0616697	0.0561608	0.29256	0.0958176	0.0616541	0.0720549
REACTOME_THROMBOXANE_SIGNALLING_THROUGH_TP_RECEPTOR	-0.300392	0.0448594	-0.368534	-0.100246	0.224556	0.207683	0.290367	-0.0748283	0.0265023	0.427212	0.148201	0.31521	0.424753	0.551651	0.378949	0.126886	0.469876	0.539666	0.16865	0.420382	0.468034	0.505075	0.503955	-0.0163252	-0.091801	0.251461	0.035854	0.612625	0.455403	0.179534	0.517719	0.2874	0.596628	-0.0118978	0.398769	0.206998	0.479089	0.266757	0.263984	0.466683	0.423254	0.553068	0.0457705	0.564605	-0.0664373	0.128274	0.320819	0.257333	0.515447
REACTOME_DEADENYLATION_DEPENDENT_MRNA_DECAY	-0.251804	-0.00471911	0.242266	-0.107543	0.284045	-0.125434	-0.129694	-0.19018	0.0774572	-0.00439458	0.143273	-0.0333701	0.103512	0.107091	-0.113547	-0.115415	-0.0554242	0.14653	-0.141231	0.0454377	0.157925	0.0277592	0.10113	-0.0190664	-0.287874	0.153213	-0.124278	-0.0479916	0.173644	0.169562	0.159961	-0.290058	0.00568458	0.0575373	0.017608	-0.173084	0.0778265	-0.047991	0.0890776	0.181997	-0.0127191	0.134717	-0.136429	-0.10836	0.0209151	0.0165706	-0.0908606	-0.167328	0.0325313
REACTOME_DEADENYLATION_OF_MRNA	0.162147	0.262223	0.4881	0.0264222	0.534496	-0.119305	-0.0793016	0.00997572	-0.0258785	-0.0958794	0.432842	-0.266529	0.015665	-0.097369	-0.308711	-0.39763	-0.502116	0.0143492	-0.556896	-0.277212	0.0820551	-0.181252	0.339367	-0.285947	-0.59633	0.195088	-0.265109	-0.47152	0.471889	0.0390061	0.222806	-0.435883	-0.174314	-0.303099	-0.0404587	-0.147891	-0.247478	-0.388544	0.0575129	0.323255	-0.184498	0.122469	-0.499443	-0.31756	-0.154893	-0.183961	-0.472531	-0.347032	-0.100843
REACTOME_MRNA_DECAY_BY_5_TO_3_EXORIBONUCLEASE	-0.0721674	0.165771	0.277712	-0.0481073	0.271341	0.257622	0.307997	0.0860559	0.31888	0.395751	0.114397	0.356655	0.37248	0.312888	0.240832	0.365838	0.309697	0.365568	0.310102	0.414315	0.277674	0.491131	0.0848568	0.337539	0.274617	0.417149	0.142827	0.56313	-0.00449345	0.227949	0.160229	0.207669	0.393174	0.459246	0.268809	0.219422	0.131761	0.373594	0.200888	0.0850618	0.438625	0.445754	0.262021	0.334877	0.255137	0.388539	0.375424	0.357258	0.257493
REACTOME_GP1B_IX_V_ACTIVATION_SIGNALLING	0.393216	0.00748291	0.246478	0.197127	0.066667	-0.257469	0.0983349	-0.0223675	0.00626649	0.0332947	-0.254913	0.178226	0.252174	-0.0825075	0.0571869	-0.0168254	0.171014	-0.0662338	0.191313	0.0276546	-0.139706	-0.143768	-0.11143	-0.364422	-0.410999	-0.341449	-0.349435	-0.262408	0.127798	-0.223243	0.148309	-0.169855	-0.0619145	-0.214649	-0.0293075	-0.176999	0.414256	-0.0473771	0.214098	-0.197316	-0.2826	0.239121	-0.133858	-0.322928	0.0914438	-0.161855	-0.494703	-0.193741	-0.133443
REACTOME_VASOPRESSIN_REGULATES_RENAL_WATER_HOMEOSTASIS_VIA_AQUAPORINS	-0.0152426	0.442607	-0.0823318	0.219207	0.120653	-0.3755	-0.200127	-0.203385	0.18484	0.0932781	-0.21944	0.183827	0.136445	-0.0563061	-0.018627	-0.177913	0.020448	-0.0888691	0.225939	0.127312	0.0204859	0.408148	0.137615	-0.273469	0.119298	-0.202466	-0.205217	0.360281	-0.182322	-0.297054	0.403688	-0.167009	0.181752	-0.156649	0.0972397	0.173509	0.11813	0.250187	-0.0922121	-0.154024	0.333217	0.0146916	0.223129	0.186643	0.0210061	0.132264	0.380564	0.365849	0.0615481
REACTOME_PLATELET_SENSITIZATION_BY_LDL	-0.213418	-0.178387	-0.361189	-0.184959	0.0180533	-0.339855	-0.275036	0.0615183	-0.306223	0.0115711	-0.36342	0.211812	0.0863698	0.246826	0.436927	0.162549	0.451129	0.0693208	0.306947	0.0684451	0.134444	0.406245	0.275759	0.449257	0.366619	0.598972	0.406338	0.388653	0.3433	0.226253	0.0038613	-0.113377	0.334214	0.0561422	0.412068	0.16267	0.208018	0.254364	0.0852964	0.115031	0.135525	0.337412	0.165863	0.527317	0.57355	0.12442	0.426579	0.337306	0.0992209
REACTOME_LYSOSOME_VESICLE_BIOGENESIS	0.128511	0.0500945	0.00113542	0.0342772	-0.124183	-0.109462	0.0364569	0.0123008	0.264591	0.124739	-0.0594053	0.135502	0.164168	0.113285	0.152335	0.0206539	0.0718126	0.0762117	0.0891338	0.233881	-0.0169919	0.015271	0.247996	-0.0289338	0.138431	0.311615	-0.109541	0.165776	0.0279799	0.186056	-0.228595	0.093174	-0.124405	0.110954	-0.00976571	-0.157455	0.35197	0.383935	0.193951	0.0771	0.48598	0.333921	0.268507	0.211147	0.075259	-0.0461372	0.260129	0.172524	-0.0394367
REACTOME_GOLGI_ASSOCIATED_VESICLE_BIOGENESIS	0.313599	0.0753067	-0.0568105	0.0980942	0.124922	0.0317933	0.205746	-0.0392611	0.279363	0.271568	-0.100134	-0.093858	-0.278557	-0.08588	-0.158462	-0.129974	-0.238768	-0.256862	-0.1551	-0.222211	-0.266845	-0.162583	-0.0332448	-0.284701	0.106199	-0.0451492	-0.298083	-0.00654317	-0.237979	-0.181241	-0.426515	-0.209324	-0.338514	-0.0678116	-0.170785	-0.0558036	0.162323	-0.0478202	-0.198426	-0.0224229	0.174552	0.228005	0.16193	0.020398	-0.130187	-0.192657	0.121426	0.0492973	-0.120613
REACTOME_RECYCLING_PATHWAY_OF_L1	0.525931	0.186299	-0.285435	-0.109192	-0.439382	-0.217181	-0.0226143	-0.00659195	-0.258492	-0.312075	0.0261501	0.0422551	-0.132545	-0.213454	-0.29378	-0.150645	-0.209745	-0.193413	-0.52506	0.133925	-0.00703341	-0.260784	-0.00594224	-0.26784	0.0330903	-0.162318	-0.137576	-0.318194	0.0820251	-0.269328	-0.285787	0.13509	-0.320333	-0.153482	-0.289369	-0.300548	0.0733452	-0.349877	0.212893	0.148961	-0.22154	0.271435	0.21191	0.216109	0.332146	-0.0930678	-0.3722	0.303091	-0.200681
REACTOME_UNBLOCKING_OF_NMDA_RECEPTORS_GLUTAMATE_BINDING_AND_ACTIVATION	0.263482	-0.409974	-0.154865	-0.0377305	-0.183754	0.308982	0.130281	0.169561	0.280797	0.383803	0.296043	0.0141037	0.118092	0.258077	0.255178	0.18698	0.270164	0.289299	-0.0821139	0.180245	-0.00239689	-0.0320622	-0.0916134	-0.0688317	0.209343	-0.181346	-0.287419	0.183061	-0.0223753	0.127935	0.0425224	0.123312	0.358598	0.206505	-0.0983319	0.001753	-0.0527561	-0.196979	-0.101181	0.126068	0.0614783	0.297305	-0.192606	-0.247211	-0.0762788	-0.240978	0.0787292	0.156662	-0.0286016
REACTOME_CREB1_PHOSPHORYLATION_THROUGH_NMDA_RECEPTOR_MEDIATED_ACTIVATION_OF_RAS_SIGNALING	0.347605	-0.357467	-0.0874661	-0.450138	-0.458156	-0.14217	-0.049465	-0.447749	-0.242818	-0.146913	0.519209	-0.158668	-0.0146753	0.207179	0.111781	-0.110408	-0.0156069	0.210521	-0.225777	-0.130338	-0.294646	-0.336581	-0.193041	0.0984694	-0.150187	-0.166741	-0.423085	-0.108921	-0.436585	-0.101221	-0.20618	0.113994	0.0381315	0.00437304	-0.318475	0.0310189	0.0599497	-0.372479	-0.167777	0.0902269	-0.0295499	0.494239	0.182351	0.0360476	-0.226706	-0.392389	-0.273607	0.54507	-0.377624
REACTOME_ACTIVATION_OF_NMDA_RECEPTORS_AND_POSTSYNAPTIC_EVENTS	0.337032	0.226708	-0.147839	-0.0671642	-0.324621	-0.14232	0.0445811	0.0132259	-0.13216	-0.185163	0.0243856	0.130878	-0.110704	-0.0643352	-0.187022	-0.315867	-0.301386	-0.0910216	-0.116265	0.0878335	0.0721287	-0.0356259	0.108846	-0.154554	0.232092	-0.252614	-0.19897	-0.0283083	-0.0928667	-0.179798	-0.207395	-0.0420537	-0.282507	0.0432604	-0.186826	-0.341419	-0.0113068	-0.328498	0.00959492	0.0793831	-0.118805	0.0678541	0.0897521	-0.0528847	0.0458735	-0.213158	-0.252483	0.31691	-0.164507
REACTOME_RAS_ACTIVATION_UPON_CA2_INFLUX_THROUGH_NMDA_RECEPTOR	0.248238	-0.48576	-0.304954	-0.217269	-0.372089	0.161879	0.00400219	0.0140607	0.132333	0.266652	0.201409	-0.0117379	0.124384	0.299719	0.248139	0.219399	0.188119	0.289631	-0.0493348	0.169767	-0.0199878	-0.105701	-0.0473675	-0.0984485	0.220645	-0.292637	-0.32103	0.164171	-0.00745009	0.0930831	0.0384069	0.121963	0.274895	0.184049	-0.219383	0.0538104	-0.105705	-0.212017	-0.126374	0.118475	0.0688855	0.215396	-0.228827	-0.307464	-0.0994455	-0.281678	0.0350405	0.233433	-0.190475
REACTOME_INTERACTION_BETWEEN_L1_AND_ANKYRINS	0.0499977	0.0617305	-0.243609	0.0642039	0.0601353	-0.165844	-0.561385	-0.403858	-0.189694	0.090615	-0.151791	-0.0225239	-0.292365	-0.318548	-0.5655	-0.174502	0.246302	-0.343522	-0.279063	0.140808	-0.121603	-0.434488	-0.0260612	-0.369572	-0.0525616	-0.559892	-0.460798	-0.0526648	-0.00253896	-0.340218	0.285735	0.227575	-0.187711	-0.576262	-0.0158146	0.0396697	0.0451236	-0.0203005	-0.109848	-0.397469	0.227247	-0.0458514	0.126995	-0.0876784	-0.314393	-0.00915312	-0.261579	0.0368678	0.0819609
REACTOME_SIGNAL_TRANSDUCTION_BY_L1	-0.00179696	-0.0916011	-0.23584	-0.359818	0.32895	0.0924656	-0.318521	-0.288436	0.0318234	0.0987504	-0.21587	0.238939	-0.210955	-0.192	0.352301	-0.0369493	-0.248698	-0.0223666	-0.175323	-0.208581	-0.273699	-0.348936	-0.345032	-0.231722	0.0235457	-0.269713	-0.397795	-0.418059	-0.211772	-0.279645	0.260822	0.16752	0.18806	-0.184673	-0.0228943	0.122643	-0.113621	-0.385025	-0.10819	-0.331839	-0.480262	-0.0114016	-0.280699	-0.268449	-0.231543	-0.399695	-0.368311	-0.244547	-0.326364
REACTOME_SMOOTH_MUSCLE_CONTRACTION	0.404175	-0.314391	-0.248398	-0.320235	-0.191805	-0.203783	-0.354031	-0.402418	-0.214353	-0.137636	-0.404989	0.156908	0.0597589	-0.138116	-0.431509	-0.139917	-0.0687544	-0.163884	-0.188338	-0.189541	-0.210185	-0.451753	-0.428455	-0.287742	-0.00833464	-0.28321	-0.376782	0.209774	-0.0238363	-0.105196	-0.185634	-0.0165216	-0.062394	-0.114485	-0.0374642	-0.088296	0.34708	-0.0682594	0.274162	0.160302	-0.3405	0.42054	0.0899507	-0.0450751	0.132922	-0.334707	0.129467	-0.0286291	-0.2895
REACTOME_AQUAPORIN_MEDIATED_TRANSPORT	0.00543614	0.447399	-0.0502391	0.235905	0.140452	-0.338361	-0.169401	-0.166096	0.208022	0.0893307	-0.188102	0.185243	0.12782	-0.0497588	-0.008687	-0.167066	0.0260459	-0.0783025	0.222905	0.138413	0.0179185	0.385145	0.128371	-0.246073	0.118409	-0.177195	-0.188453	0.370655	-0.167947	-0.284703	0.399277	-0.160474	0.195438	-0.14147	0.0942232	0.167365	0.120372	0.249906	-0.0780868	-0.1461	0.317844	0.0197505	0.211042	0.181111	0.0235703	0.139	0.372423	0.350413	0.0569107
REACTOME_TAK1_ACTIVATES_NFKB_BY_PHOSPHORYLATION_AND_ACTIVATION_OF_IKKS_COMPLEX	-0.101077	0.308567	-0.152785	0.363859	0.264833	0.410104	0.377169	0.340607	0.310833	-0.223538	-0.161296	-0.202173	8.84532e-05	-0.449879	-0.115581	-0.400497	0.145684	-0.405578	0.18979	0.223743	-0.374041	0.303903	0.0897218	0.442125	0.18684	-0.286383	-0.123918	0.183352	0.227231	0.350834	-0.273657	-0.0851251	-0.531594	0.193074	-0.465162	0.134962	-0.207622	0.184234	0.185875	0.322529	0.376734	-0.0399363	0.312447	0.244714	-0.27176	-0.334421	-0.0431779	-0.461115	-0.382609
REACTOME_TYPE_I_HEMIDESMOSOME_ASSEMBLY	0.422511	-0.179195	-0.173971	-0.0666085	0.183622	0.127003	-0.226903	-0.0294207	-0.432865	0.224578	-0.279132	-0.404702	-0.0675157	0.0124995	-0.435062	-0.497308	-0.607525	-0.045229	0.100473	0.33719	-0.314814	-0.36226	0.33161	-0.689083	-0.621434	-0.599072	-0.212577	-0.293459	-0.693909	-0.307743	-0.167178	-0.607985	-0.49674	-0.550479	-0.519126	-0.00763171	-0.387454	-0.106655	0.00214267	-0.0826002	-0.283952	-0.0285354	0.267104	-0.12901	-0.287259	-0.102355	-0.278693	-0.259789	0.0874437
REACTOME_BIOSYNTHESIS_OF_THE_N_GLYCAN_PRECURSOR_DOLICHOL_LIPID_LINKED_OLIGOSACCHARIDE_LLO_AND_TRANSFER_TO_A_NASCENT_PROTEIN	0.0584885	-0.296558	-0.135881	-0.357828	-0.142315	-0.390063	-0.200215	-0.0893654	-0.370179	-0.0603112	-0.280499	-0.0251659	-0.0589186	0.170686	0.032209	0.0329163	0.0346903	0.0908035	-0.084149	0.0738739	0.179014	0.105828	-0.0911584	0.0581339	-0.0336263	0.369241	0.0412383	0.111631	0.224206	-0.00559384	-0.016751	-0.0732685	0.0889176	0.364683	0.174083	-0.121801	0.17678	0.0137851	-0.042088	-0.0906074	0.0579174	-0.186175	-0.0527184	-0.0811157	0.108236	0.266337	0.0260861	0.0142385	0.0154742
REACTOME_ASPARAGINE_N_LINKED_GLYCOSYLATION	0.0430781	-0.0151923	-0.151217	-0.0904235	-0.0918538	-0.20919	-0.0774522	-0.00670545	-0.19355	-0.226589	-0.262688	0.0470431	-0.067481	-0.106985	-0.0530512	-0.0416674	-0.0533971	0.00469066	-0.0702229	0.0722513	0.0461808	0.0355416	0.055021	-0.139131	0.0119989	-0.108854	-0.0716329	0.02324	0.106953	0.0354278	-0.0978803	-0.0244229	-0.0898707	0.0599207	-0.0160563	-0.134971	0.046347	-0.112103	0.11092	-0.108101	-0.0150745	-0.0674376	0.0688821	-0.0748378	-0.0956573	-0.0439516	0.0116182	-0.0745265	0.00231896
REACTOME_SYNTHESIS_OF_SUBSTRATES_IN_N_GLYCAN_BIOSYTHESIS	0.041598	-0.327286	-0.199805	-0.340287	-0.220775	-0.454927	-0.318627	-0.16514	-0.431848	-0.115129	-0.315181	-0.0340671	-0.0901959	0.206134	-0.000665746	0.0165448	0.0125403	0.0389673	-0.0397606	0.0834643	0.189686	0.169452	-0.00910805	0.0597052	0.0110371	0.38883	0.0842587	0.100483	0.263692	-0.0402178	0.0364746	-0.0585087	0.0784683	0.414817	0.243306	-0.049512	0.18364	0.061423	-0.0497536	-0.116527	0.107658	-0.179816	0.0340069	-0.129754	0.154953	0.320308	0.0534774	-0.00936117	0.0477096
REACTOME_CELL_EXTRACELLULAR_MATRIX_INTERACTIONS	0.538601	-0.352046	-0.0862221	-0.182187	0.060951	-0.460838	-0.244783	0.0295104	-0.416943	0.0248275	-0.0783589	0.271079	-0.325845	-0.344599	-0.110793	-0.126936	0.0156322	-0.03891	0.0539902	-0.0939799	-0.540754	-0.203745	-0.285548	-0.368906	-0.169085	-0.240441	-0.492023	-0.299918	0.0772011	-0.363017	-0.111106	0.199787	0.178762	-0.00970385	0.140471	-0.510757	-0.248407	0.190437	0.216005	0.343335	-0.14145	0.311146	0.167141	0.245835	0.406508	0.278865	-0.220211	-0.425597	-0.241001
REACTOME_INTERLEUKIN_1_FAMILY_SIGNALING	-0.160543	-0.0223915	-0.259549	0.0415045	0.0130399	0.0482503	0.0690392	0.00152583	-0.00886359	-0.130503	-0.176202	-0.0382224	-0.176944	-0.172827	0.237881	-0.0226554	0.135662	-0.213252	0.0160939	-0.0240681	-0.207463	0.277163	0.0500248	0.173375	0.139462	-0.0333929	-0.0893165	0.321851	-0.0214171	-0.208479	-0.0239312	0.0794757	-0.103262	0.156392	-0.0612886	-0.118192	-0.0585277	-0.0429092	-0.0156067	-0.0255785	0.246612	0.0449845	-0.0380493	0.0521688	-0.121383	-0.106243	0.0839701	-0.0889596	-0.181257
REACTOME_CELL_JUNCTION_ORGANIZATION	0.24248	-0.165591	-0.0433628	0.0630514	-0.00674918	-0.178329	-0.0949926	0.00914751	-0.247613	0.0718475	-0.201896	0.0504317	-0.246008	-0.199003	-0.204607	-0.160512	-0.173687	0.041278	-0.0569038	0.05582	-0.35511	-0.10007	0.0782186	-0.379704	-0.138695	-0.351144	-0.236874	-0.199975	-0.197656	-0.190644	-0.177398	-0.110867	-0.115296	-0.227382	-0.129414	-0.173133	-0.268411	-0.0486984	0.09577	0.0405753	-0.0281211	0.0039919	-0.0382801	-0.126392	-0.0754113	0.0313734	-0.12018	-0.0583621	-0.0547936
REACTOME_INTERLEUKIN_12_FAMILY_SIGNALING	0.428947	-0.0664778	-0.337213	-0.0876555	-0.168287	0.144751	-0.213494	0.075091	-0.338143	-0.134889	0.226913	-0.207748	0.0265489	0.113171	-0.167142	0.0164501	0.181825	-0.274577	0.0962093	-0.0141742	-0.231031	0.159826	-0.100581	-0.1125	0.286977	0.059609	0.139208	0.0613824	0.382091	0.197069	0.163402	-0.125578	-0.20046	0.260306	0.0700488	-0.150144	-0.0893993	0.161116	0.187307	0.110856	-0.0163707	0.125833	-0.131299	0.0310053	0.0887124	-0.231237	-0.0997414	-0.0259869	-0.185278
REACTOME_INTERLEUKIN_17_SIGNALING	-0.306142	-0.212679	-0.40065	-0.41649	-0.00922571	0.0228597	0.0153679	-0.0567072	-0.229217	-0.437698	-0.0822847	-0.0349926	0.280899	0.046259	0.36376	-0.0707403	0.0442435	-0.174935	0.0430914	-0.0737907	-0.247963	0.16843	0.380238	0.351104	-0.0013289	-0.0759464	-0.0423452	0.336732	0.116999	0.100013	-0.0145267	-0.0420607	-0.12234	-0.0301597	0.0320087	0.0482029	0.200322	0.0889961	0.0758539	0.152619	0.0954683	0.199462	0.375901	0.257758	-0.149329	-0.320106	-0.043291	0.0756062	-0.292592
REACTOME_SIGNALING_BY_INTERLEUKINS	0.0226898	-0.0590412	-0.217933	-0.156616	-0.0309462	0.0487379	-0.0848074	0.0430201	-0.179798	-0.144647	-0.121421	-0.0534264	0.00397629	-0.00216194	0.148957	0.0345323	0.0244633	-0.0857878	0.0614043	0.0068267	-0.109951	0.186877	0.0162905	0.0130681	0.13768	0.0183499	0.0378407	0.0979709	0.0731912	-0.0247455	0.141186	0.0150287	-0.0549294	0.0893299	0.116461	0.0260327	-0.0071313	-0.0175065	0.0581074	0.0708259	0.13515	0.0929866	0.039907	0.0872954	0.0105786	-0.104908	0.0325699	0.0252013	-0.0658426
REACTOME_OTHER_INTERLEUKIN_SIGNALING	-0.11193	0.377411	0.196557	0.0191643	0.112407	0.0667571	-0.24441	0.321102	-0.436388	-0.198053	-0.419305	0.0874365	0.309936	0.217751	0.227299	0.053129	-0.0838997	-0.065898	0.310443	0.325878	-0.0867577	0.645095	0.0257274	-0.230981	0.177042	0.284358	0.0983605	-0.0857415	0.302627	0.0293315	0.346111	0.116298	0.255786	0.0515001	0.0492588	0.343456	0.15845	-0.310798	0.298306	0.155075	0.51469	0.119711	0.550877	0.278141	0.158835	0.354991	0.387554	0.0895219	0.125014
REACTOME_MAPK_TARGETS_NUCLEAR_EVENTS_MEDIATED_BY_MAP_KINASES	-0.134342	-0.293167	-0.255151	-0.581716	-0.289613	-0.258947	-0.304703	-0.414283	-0.367133	-0.382758	0.160033	0.0144443	0.19194	0.357218	0.412731	0.10785	-0.0925911	0.136786	0.0822767	-0.193421	0.0881546	-0.0135349	0.0989343	0.309899	0.0125852	0.324407	-0.0414304	0.124524	-0.281509	0.172545	-0.0372562	0.0333236	-0.0692584	-0.225901	0.251598	0.19418	0.207649	0.054007	-0.075018	0.130771	-0.156095	0.467441	0.316747	0.551712	0.149416	-0.020247	-0.0765536	0.461914	-0.180849
REACTOME_ACTIVATED_TAK1_MEDIATES_P38_MAPK_ACTIVATION	-0.486091	0.147234	-0.506646	0.22034	0.467087	0.467611	0.168344	0.581564	0.107177	-0.448683	-0.257163	-0.521751	0.225961	-0.558183	-0.129831	-0.479349	-0.0124396	-0.53773	0.0820472	0.381642	-0.553212	0.303669	0.495026	0.421511	-0.0522671	-0.416606	-0.232076	0.343775	0.382654	0.265436	-0.454678	0.0754493	-0.467022	-0.152323	-0.417272	-0.134106	0.309139	0.191225	0.276982	0.37357	0.217026	-0.285352	0.441495	0.0653206	-0.521635	-0.663072	-0.242122	-0.631813	-0.634764
REACTOME_JNK_C_JUN_KINASES_PHOSPHORYLATION_AND_ACTIVATION_MEDIATED_BY_ACTIVATED_HUMAN_TAK1	-0.590273	0.139009	-0.463398	0.238604	0.246814	0.353727	0.175705	0.330538	-0.0320306	-0.562434	-0.509463	-0.207992	0.573119	-0.286044	0.309891	-0.412493	0.438845	-0.384976	0.28585	0.304028	-0.361762	0.429558	0.610572	0.500352	0.385608	-0.362027	-0.0365092	0.601196	0.430938	0.46959	-0.332326	0.214039	-0.333708	0.371523	-0.351295	0.293371	0.380975	0.32468	0.522931	0.670537	0.439613	0.10817	0.592372	0.423403	-0.30249	-0.411589	0.127729	-0.282942	-0.416757
REACTOME_AUF1_HNRNP_D0_BINDS_AND_DESTABILIZES_MRNA	-0.293584	-0.0408228	-0.263406	-0.0845128	0.114467	-0.00383638	-0.0136077	-0.0865484	-0.0321444	-0.121572	-0.13501	0.0210966	-0.302269	-0.23252	0.351076	-0.284736	0.0357528	-0.169568	-0.0261444	-0.0201414	-0.120857	0.249511	0.0797484	0.0680735	-0.00987669	-0.242533	-0.0639258	0.356396	0.108547	-0.228267	-0.0224443	0.19124	-0.283513	0.116159	-0.00794355	-0.303952	0.0559675	-0.000142468	-0.143084	0.0186306	0.172684	0.0894547	-0.0604963	-0.0331864	-0.247289	-0.268494	-0.107611	-0.0904132	-0.213961
REACTOME_REGULATION_OF_MRNA_STABILITY_BY_PROTEINS_THAT_BIND_AU_RICH_ELEMENTS	-0.169371	-0.00558467	-0.198351	-0.00928345	0.127599	-0.0854492	-0.0795657	-0.060119	-0.0795527	-0.116146	-0.134925	-0.0285012	-0.281227	-0.252921	0.332246	-0.248574	0.0503853	-0.0856817	-0.0480835	-0.0154055	-0.111224	0.276987	0.0274148	-0.0234949	-0.0240385	-0.200415	-0.166596	0.203959	0.109682	-0.266321	0.00482803	0.146528	-0.247714	0.0642981	-0.00034078	-0.207015	-0.00833722	-0.000583178	-0.0884237	0.0495996	0.19641	0.114723	-0.11088	-0.0998175	-0.247042	-0.256692	-0.0280521	-0.0599923	-0.193084
REACTOME_ACTIVATION_OF_KAINATE_RECEPTORS_UPON_GLUTAMATE_BINDING	-0.130457	-0.248747	-0.56859	-0.244288	0.162111	-0.0448707	-0.223827	-0.230599	0.0960783	0.324423	0.273142	-0.0568787	0.517527	0.291622	0.481994	0.14856	0.347782	0.485336	0.420325	0.37846	0.0619775	0.264937	0.27266	0.0223248	0.218169	-0.0588946	-0.00651354	0.432622	0.0827523	0.11693	0.44321	0.407409	0.449383	0.0527673	0.228573	0.515887	0.316868	-0.031022	0.190309	0.343869	0.298157	0.468875	0.301432	0.237313	0.0803226	0.22558	0.544475	0.402464	0.320502
REACTOME_INTERLEUKIN_2_FAMILY_SIGNALING	0.0430476	0.0242202	-0.0851429	0.0296653	0.0347968	-0.0150476	0.0642828	0.0144762	0.275024	0.23326	0.213723	0.279487	0.213777	-0.0176861	-0.0401398	0.245561	0.229338	-0.21766	-0.013798	0.106534	0.122523	0.299981	0.15063	0.174362	0.321058	0.283832	0.070917	0.268713	0.08041	0.212226	-0.0889936	0.0242498	0.210315	0.288789	0.293342	0.17126	0.0584718	0.0801991	0.0889404	-0.0370942	0.232433	0.176036	0.123937	0.222449	0.200026	0.21269	0.121972	0.178737	0.161456
REACTOME_MITOTIC_G2_G2_M_PHASES	0.0659688	0.172341	-0.223044	0.106779	-0.0631696	0.00903975	0.0224446	0.0714941	-0.00400357	-0.156071	-0.121337	0.114595	-0.0839093	-0.03977	0.210237	-0.180523	0.00886565	-0.0514982	-0.0901635	0.0914536	0.0883137	0.280664	0.0822611	0.00780228	0.264194	-0.191525	-0.00380241	0.206768	0.20782	-0.194657	0.0106229	0.145092	-0.158346	0.118267	-0.00109208	-0.106294	0.0450886	-0.0838713	0.133764	0.00893221	0.172466	0.154865	-0.0662664	0.106036	0.0616884	-0.00706495	-0.00789661	0.072658	-0.050583
REACTOME_MITOTIC_G1_PHASE_AND_G1_S_TRANSITION	-0.288441	0.0619502	-0.226993	0.0447534	0.142215	0.050947	0.0451206	0.0194365	0.0718049	-0.0239519	0.0287848	0.0417806	0.120325	0.0379539	0.345113	-0.11435	0.149567	-0.129499	0.0302862	0.0804958	-0.112441	0.37516	0.0939756	0.0356213	0.159092	-0.0810421	0.0242155	0.369686	-0.0872382	-0.0979091	-0.0984677	0.113942	-0.0461209	0.0402901	0.0733126	-0.0668818	0.0971118	0.0746003	-0.10742	-0.0163585	0.231866	-0.0440042	0.0261566	0.115796	-0.163798	-0.159737	0.184188	-0.0594271	-0.075506
REACTOME_SUMOYLATION_OF_CHROMATIN_ORGANIZATION_PROTEINS	-0.0856442	-0.293308	0.237779	-0.0688412	0.228721	-0.00545577	-0.0310821	0.180322	-0.0403344	-0.0312565	0.0122227	0.0288889	0.160361	0.0869033	0.105209	-0.0242159	0.2761	0.0809246	0.277276	0.192411	0.197978	0.176226	0.221287	0.174848	0.28009	0.24364	0.198972	0.292957	-0.00100929	0.224088	-0.13438	0.0831377	0.221665	0.0630946	0.282652	0.148646	0.25523	0.158507	0.0929487	-0.00912381	0.184927	-0.0184947	0.160177	0.140477	0.128927	0.0204347	0.1875	0.0802067	0.146245
REACTOME_THROMBIN_SIGNALLING_THROUGH_PROTEINASE_ACTIVATED_RECEPTORS_PARS_	-0.402404	0.111094	-0.494653	-0.28738	0.222354	0.170097	0.185056	-0.277909	0.0635768	0.246135	0.2839	0.246059	0.123824	0.299068	0.359369	-0.0256507	0.406298	0.479124	-0.00282597	0.0371947	0.136212	0.125881	0.411925	-0.0790499	-0.17538	0.267703	-0.190011	0.0949482	0.238196	-0.0955625	0.211078	0.0846727	0.287844	-0.103928	0.248834	-0.0489828	0.286403	-0.0750966	0.159613	0.0169477	0.203886	0.297809	-0.0732918	0.276448	-0.0233347	-0.223	0.0018415	0.152661	0.0615586
REACTOME_SUMOYLATION_OF_RNA_BINDING_PROTEINS	-0.141502	-0.289695	0.0841426	-0.103334	0.286009	-0.139891	0.0803037	0.124312	-0.0340703	-0.0772767	-0.0403429	0.0740059	0.181471	0.121197	0.144308	-0.0848351	0.327215	0.0606468	0.283057	0.193337	0.179439	0.174836	0.158341	0.0864912	0.28075	0.248236	0.230105	0.321126	0.0454592	0.269858	-0.110332	0.15497	0.1952	0.122462	0.29846	0.169361	0.174252	0.207308	0.133595	-0.0792411	0.160658	0.00898607	0.244125	-0.0314627	0.149102	-0.044131	0.155662	-0.0387342	-0.0113249
REACTOME_ASYMMETRIC_LOCALIZATION_OF_PCP_PROTEINS	-0.341251	-0.0498329	-0.324885	-0.0878853	0.0685778	-0.0350848	0.0327353	-0.0688275	-0.024509	-0.122591	-0.102232	0.00157316	-0.217119	-0.236974	0.308875	-0.268148	0.149682	-0.225244	-0.00506175	0.0309754	-0.190943	0.225969	0.000777055	0.0565637	-0.00195635	-0.287199	-0.00137652	0.348002	0.0726172	-0.270557	-0.0472566	0.207163	-0.293919	-0.0243781	-0.0955715	-0.236259	0.092686	0.0471933	-0.106296	0.0215047	0.280421	0.116698	-0.0159123	0.0608112	-0.177955	-0.262731	-0.0107578	-0.105847	-0.192278
REACTOME_SUMOYLATION_OF_DNA_REPLICATION_PROTEINS	-0.101891	-0.32641	0.0936647	-0.156799	0.299796	-0.0938017	-0.119931	0.077274	-0.00866053	-0.00635288	-0.0587637	0.0760839	0.197538	0.0777551	0.113633	-0.0103009	0.343736	0.0539798	0.247544	0.244252	0.258125	0.0847047	0.235651	0.171949	0.303168	0.181999	0.239635	0.342426	-0.0151938	0.216522	-0.178273	0.141798	0.192004	0.00370937	0.440689	0.125084	0.263456	0.167751	0.0766923	-0.0911871	0.203392	0.00418832	0.171534	0.155584	0.138319	0.00325905	0.256878	0.0270565	0.0988414
REACTOME_DEGRADATION_OF_AXIN	-0.323883	-0.0230115	-0.328333	-0.0880032	0.102399	-0.00781426	0.00268979	-0.0371222	-0.0660569	-0.157787	-0.12762	-0.0357611	-0.197399	-0.21577	0.351033	-0.252214	0.125286	-0.183375	-0.00523325	0.0314538	-0.172474	0.26922	0.0282756	0.0318288	0.041321	-0.26019	-0.0355094	0.350688	0.0561154	-0.276599	-0.0470624	0.196242	-0.297758	0.0224046	-0.101335	-0.215	0.130318	0.0771347	-0.136233	0.0176579	0.259772	0.112471	-0.0196814	0.0608244	-0.206554	-0.24713	0.000914096	-0.0840892	-0.181048
REACTOME_DEGRADATION_OF_DVL	-0.340544	-0.061804	-0.347368	-0.122592	0.0634873	-0.0416352	-0.0352216	-0.0808366	-0.106025	-0.187421	-0.164126	-0.0646676	-0.197119	-0.233267	0.318803	-0.262789	0.0838469	-0.219668	0.00284267	0.0597351	-0.197558	0.28396	0.00285968	-0.00742353	0.00392364	-0.274287	-0.0138485	0.343762	0.0146759	-0.297028	-0.0237267	0.205707	-0.310001	-0.0212059	-0.11905	-0.236654	0.130117	0.0949656	-0.0998025	-0.000720785	0.259283	0.0674783	-0.0477127	0.0226306	-0.198662	-0.23806	-0.0320993	-0.105519	-0.17203
REACTOME_DISASSEMBLY_OF_THE_DESTRUCTION_COMPLEX_AND_RECRUITMENT_OF_AXIN_TO_THE_MEMBRANE	-0.184061	-0.146777	0.101131	0.241226	0.0294654	-0.12557	0.179157	0.243686	-0.0402676	-0.0992889	-0.205665	0.455758	0.510801	0.592227	0.577456	0.479491	0.404395	0.254073	0.47142	0.422142	0.455327	0.550106	0.391118	0.39735	0.502126	0.432703	0.568135	0.523574	0.00407166	0.473801	0.279516	0.420963	0.429929	0.187546	0.596769	0.268144	0.0585572	0.30804	0.440173	0.317281	0.471949	0.337014	0.311849	0.406604	0.518461	0.424469	0.571092	0.576642	0.332824
REACTOME_SIGNALING_BY_WNT_IN_CANCER	-0.193965	-0.137097	0.0293591	0.184301	-0.0299525	-0.0973518	-0.112806	-0.0431714	-0.123572	-0.260816	-0.189952	0.243806	0.457539	0.418881	0.489632	0.430259	0.470261	0.178688	0.456492	0.33316	0.465958	0.573788	0.467135	0.366646	0.554399	0.543556	0.553885	0.628883	0.168153	0.480921	0.152371	0.366414	0.203739	-0.0153777	0.507172	0.127493	0.0648295	0.290095	0.494351	0.246723	0.482325	0.304635	0.309237	0.211529	0.559931	0.279507	0.481177	0.477101	0.355113
REACTOME_INTERCONVERSION_OF_NUCLEOTIDE_DI_AND_TRIPHOSPHATES	0.282402	-0.312484	-0.194634	0.422187	0.428368	0.143717	0.10554	-0.286398	0.284453	0.168592	0.148754	0.195634	0.430884	0.196041	0.235833	0.182648	0.386443	0.489101	0.119359	0.528856	0.261766	0.519804	0.224901	0.15372	0.557585	0.511414	0.390021	0.499718	0.345848	0.268118	0.597141	0.494039	0.293997	0.492026	0.161477	0.177361	0.0945028	0.267266	0.489906	0.114049	0.481313	0.450621	0.196253	0.21118	0.226871	0.304899	0.0466741	-0.0547324	0.300866
REACTOME_GPCR_LIGAND_BINDING	-0.00565893	-0.0371778	-0.516453	-0.197773	-0.328231	-0.379537	-0.313792	-0.350421	-0.374817	-0.117272	-0.199058	-0.106728	-0.0402963	-0.114311	-0.112298	-0.0992595	0.146405	0.16267	0.142681	0.201832	-0.322137	-0.0991625	-0.188131	0.0106119	-0.180775	0.0396601	-0.0922917	-0.327292	0.126472	-0.269921	0.349596	0.147126	0.142809	-0.32662	0.11181	0.023274	0.158495	-0.0216575	-0.114899	-0.100065	-0.196237	0.118174	-0.0178452	0.232384	0.173652	0.0459626	0.0719063	-0.108826	0.121742
REACTOME_WNT5A_DEPENDENT_INTERNALIZATION_OF_FZD4	0.379056	-0.237747	0.0703604	0.110854	0.0405752	0.106657	0.142206	-0.0686637	0.219419	0.275564	0.426805	-0.225361	-0.389097	0.0614822	-0.0478943	0.233806	-0.491172	-0.237645	-0.5957	0.256713	-0.41662	-0.533162	-0.122945	-0.175288	-0.0766639	-0.14544	0.233744	-0.47596	0.0532326	-0.270114	0.0587956	-0.116472	-0.301515	-0.350305	-0.588661	-0.00344436	0.0295104	-0.39148	-0.155223	-0.452725	-0.339543	0.177511	-0.438842	-0.234864	-0.316669	-0.0906651	-0.492387	-0.0614525	0.000943609
REACTOME_INTERLEUKIN_3_INTERLEUKIN_5_AND_GM_CSF_SIGNALING	-0.295495	0.0198628	-0.240442	-0.0341876	0.114221	-0.0142227	-0.0233352	0.0315683	-0.0557517	-0.129604	-0.311441	-0.129197	0.296182	-0.175892	-0.127068	-0.107114	0.0901238	-0.290858	0.127029	-0.159668	-0.110598	0.277267	0.156496	0.188051	0.152311	-0.225648	-0.0364001	0.257773	-0.0710936	0.115599	-0.291025	-0.0199618	-0.0479093	0.0195426	0.0559096	0.196282	0.113855	0.270493	0.224892	0.290741	0.361167	-0.00548031	0.263149	-0.0148546	-0.102691	-0.155609	-0.086829	0.0990099	-0.0858773
REACTOME_O_LINKED_GLYCOSYLATION	-0.0333721	0.461936	0.406937	0.16796	-0.161288	-0.0184108	0.0162173	0.221706	0.372411	0.116594	-0.0404792	0.0711087	0.0686007	0.107209	0.0221949	0.0635087	-0.267217	0.153782	0.081904	0.0922728	-0.0310572	-0.153297	-0.0359956	0.034533	-0.184048	-0.2636	0.0550213	-0.126435	0.169337	0.18994	0.338065	0.276389	0.258029	0.153959	-0.16096	0.0692999	0.108061	0.15915	0.119322	0.200424	0.139298	-0.0863397	-0.0270658	0.0793418	0.206952	0.0512439	-0.0272877	0.111749	0.0581918
REACTOME_MITOPHAGY	-0.482629	0.0540411	-0.362499	-0.131253	0.0193326	0.0748549	-0.204438	0.040031	-0.288219	-0.569339	-0.490374	-0.0483514	0.339726	-0.058728	0.480226	-0.147416	0.390944	0.0232607	0.237217	0.254399	-0.0395144	0.495118	0.573335	0.290061	0.413765	-0.374757	0.026415	0.361935	0.429757	0.258202	-0.146388	0.399369	-0.183704	0.447973	-0.0605833	0.343755	0.316944	0.393324	0.346963	0.381706	0.576723	0.340804	0.448393	0.535907	-0.243757	-0.344217	-0.230043	0.0940454	-0.322787
REACTOME_PINK1_PRKN_MEDIATED_MITOPHAGY	-0.566794	0.0683049	-0.276459	0.13999	0.252425	0.347144	0.165748	0.174194	-0.370104	-0.612923	-0.625847	-0.009776	0.477433	-0.284485	0.427393	-0.320552	0.371243	-0.105398	0.222178	0.281417	-0.162589	0.590733	0.644681	0.382355	0.476439	-0.518924	0.346403	0.66665	0.482891	0.491093	-0.238596	0.440861	-0.364801	0.430271	-0.31589	0.402455	0.447381	0.529913	0.515846	0.606445	0.682594	0.464397	0.662918	0.664279	-0.441868	-0.412836	-0.0148809	0.0522645	-0.28047
REACTOME_UPTAKE_AND_FUNCTION_OF_ANTHRAX_TOXINS	0.030722	-0.156252	-0.0896111	-0.389408	-0.22019	-0.205119	-0.509625	-0.263685	-0.191743	0.27147	0.488679	-0.162403	0.145074	-0.120735	0.424853	0.493179	0.133388	0.288175	-0.0678836	0.335262	0.059358	0.118396	0.459651	0.276364	0.239493	0.147366	0.314079	0.220406	0.443218	0.0198781	0.671314	0.34125	0.0702406	0.183604	0.126068	0.0251116	0.202681	0.434671	0.458501	0.117872	-0.128868	0.395737	0.15506	-0.125792	0.58065	-0.17828	0.441534	-0.190113	-0.231678
REACTOME_VEGFR2_MEDIATED_VASCULAR_PERMEABILITY	-0.130013	0.126436	-0.248852	-0.0696937	0.12797	-0.0171461	-0.128181	0.11556	-0.172865	-0.0735875	-0.0617641	0.114569	-0.0180555	0.0450993	0.0810828	-0.130035	0.0582832	-0.01592	-0.0201407	-0.131671	-0.390443	0.234121	0.228828	-0.182815	0.0951638	-0.129265	-0.0670377	0.135593	0.0668416	-0.196137	-0.0898359	0.301625	0.0397247	0.111689	0.247713	0.0421967	-0.202524	-0.214667	0.0154704	0.153907	-0.127114	0.0975351	-0.0943354	-0.276085	-0.387378	-0.294118	0.0522232	-0.0107533	-0.0668268
REACTOME_VEGFR2_MEDIATED_CELL_PROLIFERATION	0.23107	0.187383	-0.0312166	0.0974707	0.227557	-0.0148162	0.0759927	0.259136	0.197263	0.125546	0.112793	-0.279832	0.076105	0.0338411	-0.0547661	0.210062	0.108688	-0.103068	0.151216	0.0211852	-0.159876	0.0554097	-0.0612911	-0.195955	-0.0587478	-0.405011	-0.408581	0.151816	0.0328569	0.0295434	-0.113636	-0.246193	-0.0527608	0.308823	-0.281986	-0.206074	-0.138538	-0.195894	-0.253531	-0.126749	0.138207	-0.111187	-0.0306252	-0.331192	0.0187502	-0.127603	-0.0663276	-0.233299	-0.424879
REACTOME_POSITIVE_EPIGENETIC_REGULATION_OF_RRNA_EXPRESSION	0.232879	-0.307653	-0.22673	-0.227326	0.12755	-0.176335	0.075734	-0.16432	-0.146074	0.0226341	0.448125	-0.43593	-0.109951	-0.283848	-0.330744	0.162088	0.0164062	-0.0821912	0.110817	-0.36984	-0.185385	0.218717	-0.201724	-0.125928	0.104551	0.225094	-0.217067	-0.196407	-0.352078	0.0199012	-0.104877	-0.056284	0.407749	-0.185877	-0.162854	0.114842	-0.0473035	-0.00566601	-0.277084	0.193941	-0.101341	-0.31029	-0.297129	0.167143	0.114556	-0.535837	0.0982635	-0.250355	0.0742744
REACTOME_B_WICH_COMPLEX_POSITIVELY_REGULATES_RRNA_EXPRESSION	0.320489	-0.440826	-0.319388	-0.294666	0.0828815	-0.309476	-0.0140228	-0.318511	-0.252071	-0.000171258	0.509023	-0.47435	-0.0390272	-0.238627	-0.345121	0.323095	0.0380571	-0.140838	0.311901	-0.422373	-0.124861	0.311608	-0.242043	-0.223499	0.256437	0.232772	-0.212495	-0.268662	-0.38464	0.168692	0.0557088	0.0882028	0.529964	-0.187986	-0.123038	0.267076	0.117183	0.141366	-0.324929	0.240938	-0.0994115	-0.192431	-0.329313	0.392454	0.222039	-0.581405	0.240093	-0.282879	0.113682
REACTOME_NEGATIVE_EPIGENETIC_REGULATION_OF_RRNA_EXPRESSION	0.32301	-0.430815	-0.313809	-0.215265	0.146712	-0.300189	0.0116326	-0.306858	-0.202744	-0.00199024	0.54585	-0.503221	0.0552882	-0.272573	-0.317537	0.246723	0.0264444	-0.148064	0.341891	-0.436576	-0.0868046	0.380937	-0.267063	-0.0677516	0.299284	0.303675	-0.132679	-0.231692	-0.411583	0.137305	0.0677012	0.135923	0.512215	-0.1344	-0.120234	0.277015	0.110672	0.0901173	-0.34751	0.310294	-0.114004	-0.234875	-0.322894	0.399234	0.240001	-0.607355	0.207853	-0.344051	0.173083
REACTOME_MYOGENESIS	-0.131425	0.218155	0.37886	0.445214	-0.156023	0.0645346	0.1925	0.22605	-0.185517	-0.00287902	-0.369668	0.490271	0.117401	0.253356	-0.0421474	0.00184792	0.167991	0.115583	-0.12995	0.271487	-0.0762099	0.0959917	-0.0786371	0.250775	-0.167549	-0.30589	0.00914862	0.0956549	0.124615	0.0218212	-0.0194616	0.0629991	-0.09663	0.0441291	-0.0327298	0.193525	-0.305279	-0.294833	0.351318	-0.28062	0.0664646	0.00329492	-0.163641	-0.120413	0.081495	-0.00302123	0.162946	0.123934	-0.302997
REACTOME_DISEASES_OF_IMMUNE_SYSTEM	0.367251	0.207883	0.289907	0.0411613	0.10744	-0.0474449	0.156459	-0.0140817	0.321085	-0.32816	-0.310294	0.0812869	-0.431145	-0.16339	-0.301887	-0.49125	-0.232008	-0.554834	-0.0214711	0.00754843	-0.132504	-0.148647	-0.43409	0.175432	-0.10963	-0.487674	-0.344489	-0.0892838	0.0780533	-0.336427	-0.142774	-0.200899	-0.375754	-0.0725993	-0.380006	-0.165852	-0.308508	-0.326418	-0.0206195	0.0745264	-0.172689	0.00101983	-0.0429197	-0.453114	-0.133931	0.074698	0.168624	-0.555703	-0.392823
REACTOME_N_GLYCAN_TRIMMING_IN_THE_ER_AND_CALNEXIN_CALRETICULIN_CYCLE	-0.131538	-0.374272	-0.464196	-0.119662	-0.125036	-0.0246454	0.191765	-0.229769	-0.150988	-0.364975	-0.369565	0.0591626	-0.018305	-0.169125	-0.00580421	0.0103307	0.357839	-0.172323	0.125441	-0.11135	-0.00491235	0.412878	0.228476	-0.134404	-0.166664	-0.34768	-0.199238	0.36432	0.1268	0.24048	-0.179701	0.286431	-0.259991	0.0172356	-0.052233	-0.0448699	0.107014	0.133762	0.272458	0.337103	0.323542	0.161194	0.326789	0.0931273	-0.434448	-0.221451	0.218814	-0.206319	-0.235491
REACTOME_DNA_METHYLATION	0.470707	-0.330235	-0.333574	-0.256369	0.295717	-0.334248	0.116206	-0.383595	-0.238194	-0.00909916	0.641827	-0.605074	-0.0760305	-0.322177	-0.395857	0.141383	-0.0390821	-0.128644	0.363536	-0.489722	-0.1955	0.308219	-0.342073	-0.255348	0.277048	0.325254	-0.211492	-0.269378	-0.450951	0.100766	0.0134499	0.0624532	0.581865	-0.20457	-0.155765	0.325285	0.138119	0.0598318	-0.478637	0.245548	-0.188404	-0.245644	-0.368059	0.443451	0.191261	-0.687132	0.197005	-0.45165	-0.063244
REACTOME_UPTAKE_AND_ACTIONS_OF_BACTERIAL_TOXINS	0.0356989	0.0641721	0.0784634	-0.0933704	0.0382613	-0.227396	-0.406424	-0.159701	-0.294839	0.0932344	0.211666	-0.170444	0.0931499	0.00285378	0.340589	0.0980066	-0.119967	0.240463	-0.0390275	0.231814	0.136142	0.0434591	0.0452549	0.262025	0.122653	0.312063	0.358456	-0.0620304	0.211854	-0.101869	0.477201	0.428584	-0.0527442	0.0707205	0.172164	0.184694	0.188975	0.25879	0.283428	0.0530292	-0.0502486	0.351108	0.1063	0.0633936	0.326354	-0.182305	-0.280655	0.0182009	-0.131343
REACTOME_PROGRAMMED_CELL_DEATH	-0.152634	0.00866271	-0.140203	-0.0917042	0.0784286	-0.134697	-0.151783	0.0213145	-0.17837	-0.177004	-0.118006	0.0154809	-0.123756	-0.173606	0.0660164	-0.204295	-0.00729044	-0.0794334	-0.190256	-0.157372	-0.174084	-0.105422	-0.139688	-0.131998	-0.0248741	-0.111315	-0.222671	0.00894789	-0.113809	-0.110262	-0.133127	-0.0359874	-0.310558	-0.112461	-0.121138	-0.223975	-0.0357601	-0.107443	-0.0129923	-0.0218496	0.0354248	-0.0347192	-0.0965561	-0.11383	-0.181191	-0.270986	-0.134995	-0.0758657	-0.248865
REACTOME_REGULATION_OF_TNFR1_SIGNALING	-0.36633	0.270319	-0.0969286	0.375331	0.188556	0.426977	0.389891	0.297273	0.36105	-0.192719	-0.377201	-0.416701	0.303648	-0.25708	-0.0508099	-0.459342	-0.102931	-0.438733	0.153793	-0.286704	-0.405663	0.196022	0.369547	0.0819562	0.0380073	-0.610844	-0.482448	0.146657	0.22535	0.206807	-0.383389	-0.136104	-0.343672	-0.110563	-0.620474	-0.0916967	-0.0226098	0.236867	0.109922	0.329215	0.167132	-0.00684239	0.270574	0.109625	-0.567209	-0.325077	-0.105652	-0.234976	-0.492824
REACTOME_TNFR1_INDUCED_NFKAPPAB_SIGNALING_PATHWAY	-0.378839	0.312405	-0.103512	0.396618	0.196964	0.480259	0.401765	0.265842	0.395371	-0.193544	-0.381337	-0.464427	0.142597	-0.342434	-0.110583	-0.486338	-0.247939	-0.50682	0.161296	-0.340772	-0.445055	0.113854	0.336439	-0.00459995	-0.0697825	-0.6762	-0.529648	0.151688	0.159165	0.145676	-0.443194	-0.191203	-0.350723	-0.250377	-0.657508	-0.247762	-0.0629625	0.15208	0.0561024	0.287279	0.17639	-0.0945301	0.274017	0.0251247	-0.620716	-0.448884	-0.28057	-0.384365	-0.619521
REACTOME_HEDGEHOG_LIGAND_BIOGENESIS	-0.316558	-0.0863257	-0.350464	-0.122766	0.0179856	0.00506474	0.0566692	0.032053	0.0112562	-0.11129	-0.05781	-0.0489285	-0.149866	-0.149239	0.331615	-0.189426	0.0442222	-0.150695	-0.00763281	-0.0401116	-0.119908	0.214857	-0.0368192	0.0851128	0.0148714	-0.264393	0.0280074	0.262809	0.00660202	-0.245664	-0.0320272	0.113716	-0.28521	0.0366307	-0.0321352	-0.223247	0.121125	0.0379151	-0.195897	-0.056537	0.15958	0.0636721	-0.0591329	0.0214367	-0.214652	-0.199182	0.0452142	-0.0500909	-0.151379
REACTOME_SIGNALING_BY_HEDGEHOG	-0.07184	0.0615719	-0.371395	0.0350794	-0.138678	-0.196011	0.0431552	0.0340067	-0.0599618	-0.260961	-0.251387	0.0479879	-0.14819	-0.217003	0.0897297	-0.229476	-0.14916	-0.261655	-0.142795	0.0231046	-0.0558559	0.196695	-0.0197186	-0.162366	0.160735	-0.303135	-0.0929606	0.232276	0.0654898	-0.256527	-0.0644033	-0.0217662	-0.304404	-0.0290136	-0.04527	-0.258983	0.100557	-0.0928362	-0.0453305	-0.0537979	0.06202	-0.00878138	-0.118998	-0.0256684	-0.04543	-0.186436	-0.0422883	0.0808224	-0.20563
REACTOME_SIGNALING_BY_RETINOIC_ACID	-0.199628	-0.0300814	-0.0265034	-0.415388	0.0934492	0.0873898	-0.0921553	-0.189726	0.100745	-0.264939	-0.0387503	-0.121309	-0.110097	0.0121655	-0.0271135	0.107496	-0.00633647	0.127149	-0.0938656	-0.232579	0.210164	0.0219306	0.0160324	0.202277	0.118227	0.3055	0.0875541	0.28509	0.142262	0.23616	0.097378	-0.00316288	0.0116527	0.303669	-0.0621424	-0.0539314	-0.0875725	0.137741	-0.338329	-0.0356742	0.277301	-0.0316136	0.0793988	-0.196285	-0.0820284	-0.0159328	-0.0930268	-0.0525126	-0.218575
REACTOME_RA_BIOSYNTHESIS_PATHWAY	-0.309934	0.384817	0.0463176	-0.508514	0.261988	0.379372	0.248255	0.299126	0.355536	-0.448155	-0.0185334	-0.172131	-0.0314571	0.101081	0.301164	0.21867	0.057941	0.227854	-0.0938517	-0.0548942	0.226691	-0.300207	-0.106194	0.292498	0.159641	0.295839	-0.0511807	0.174978	-0.0985387	0.121356	0.453622	0.382476	0.207608	0.0252852	0.132767	-0.069108	-0.109689	0.000462071	-0.381031	-0.118959	0.415849	-0.0825035	0.151282	-0.0764029	0.0963561	0.0705812	0.0593139	-0.00540681	-0.167599
REACTOME_MITOCHONDRIAL_TRANSLATION	0.198387	0.145655	0.217546	0.119275	0.117073	0.0255585	0.17012	-0.0510866	0.0305788	0.0834355	0.143801	-0.0964893	0.197273	-0.0252312	0.197666	0.198375	-0.124556	-0.0913243	0.0862072	-0.164646	0.0800611	0.108733	-0.105198	-0.0135955	0.132931	-0.0168545	0.105006	0.0595176	-0.0364305	0.112348	0.0115503	0.149087	0.0813498	0.182197	0.201953	-0.0146302	0.141057	0.0973296	0.00782875	0.0633014	0.0903207	0.0247992	0.0111236	-0.120001	-0.0286461	0.187906	-0.0364574	0.159544	0.0342663
REACTOME_AFLATOXIN_ACTIVATION_AND_DETOXIFICATION	-0.224537	0.0930434	0.127321	-0.0959223	0.0860194	0.200249	-0.0655673	-0.182783	0.1127	-0.286967	-0.329261	0.0522052	0.488345	0.26095	-0.0601023	0.175863	-0.20755	-0.29992	0.461491	0.108301	0.114436	-0.130071	0.0582571	-0.240105	-0.0271474	0.0386671	0.245661	0.143998	0.240356	0.159793	0.113946	0.202462	0.54924	0.461997	-0.191097	-0.0263168	0.433002	-0.231279	0.100745	0.262878	-0.0383094	-0.199204	0.454248	-0.0782045	0.520792	-0.0108716	-0.0703256	0.206784	-0.376954
REACTOME_METABOLISM_OF_LIPIDS	-0.183002	-0.0697412	-0.0590968	-0.0760054	-0.122979	-0.0552028	0.000421866	-0.0821816	0.0202532	0.00912346	-0.134792	-0.0270175	-0.0701157	0.0349697	-0.118124	-0.0803899	-0.0468028	-0.0757931	0.000694588	-0.0389345	0.00410156	0.0975543	-0.0495304	-0.0665495	-0.129048	-0.0285484	-0.0291749	-0.0760768	-0.141514	0.0194319	-0.136136	-0.0683692	0.0227833	-0.00725125	0.0163218	0.0124515	-0.0113154	-0.107055	-0.127072	-0.108741	-0.00914698	-0.0469563	0.0589304	-0.0985642	-0.0200122	-0.0493305	-0.0591913	-0.0503052	-0.0651136
REACTOME_CARDIAC_CONDUCTION	0.194144	-0.265129	0.0897993	-0.275273	-0.362303	-0.10342	0.195044	-0.332356	-0.022673	0.193857	-0.149034	-0.353108	-0.235142	-0.26821	0.0765659	0.193953	-0.20927	0.0496795	-0.510742	0.182498	0.0684026	0.191478	-0.244917	-0.21359	0.10035	0.062597	-0.246126	0.154817	-0.368034	0.126388	-0.0199607	0.0650843	-0.25601	0.0517334	-0.274795	-0.267249	-0.444818	-0.128418	-0.19086	-0.132637	-0.304733	-0.197153	-0.19227	-0.317144	-0.397543	-0.24986	0.0981514	-0.0976328	-0.220318
REACTOME_TRANSCRIPTIONAL_REGULATION_BY_SMALL_RNAS	0.185931	-0.328642	-0.164652	-0.241794	0.240942	-0.261226	-0.00533408	-0.135997	-0.100965	-0.0835354	0.388112	-0.364583	0.0188392	-0.185123	-0.17847	0.026582	0.109514	-0.102431	0.257917	-0.217501	0.0706177	0.288852	-0.0612765	-0.131294	0.272274	0.224976	-0.118422	-0.0497906	-0.353837	0.13555	-0.0828868	0.124725	0.445138	-0.097819	0.00965453	0.184283	0.189684	0.114796	-0.246907	0.0936835	-0.0448294	-0.18024	-0.196946	0.209207	0.131756	-0.388605	0.154328	-0.267692	0.0181515
REACTOME_ION_HOMEOSTASIS	0.285965	-0.220679	0.131286	-0.282359	-0.329226	-0.159742	0.104632	-0.267928	0.0307714	0.218671	-0.063139	-0.356682	-0.290598	-0.333531	0.0936521	0.0805342	-0.311949	0.123112	-0.523997	0.15395	0.0628346	0.171122	-0.296438	-0.284668	0.0610808	0.175986	-0.301123	0.186645	-0.28879	0.0522677	-0.011516	0.112317	-0.281249	0.0206442	-0.357639	-0.32546	-0.403958	-0.100676	-0.124545	-0.193117	-0.35242	-0.268212	-0.21188	-0.389363	-0.384016	-0.26682	0.126739	-0.118632	-0.160699
REACTOME_METABOLIC_DISORDERS_OF_BIOLOGICAL_OXIDATION_ENZYMES	0.0730072	-0.0322734	-0.284685	-0.174963	0.013558	-0.0755381	-0.110396	-0.295731	-0.0155327	0.150462	-0.164538	-0.263436	0.0794309	0.0610593	0.481726	0.354852	-0.0597483	-0.364087	0.0597487	-0.0711601	-0.01009	0.319014	-0.0561592	0.149135	0.402071	-0.0466852	0.0151235	0.579586	-0.189868	-0.0563428	-0.152188	-0.0426818	0.0450283	0.242816	-0.0288427	-0.057461	0.157696	0.170744	-0.0110246	0.24052	0.0365647	-0.173656	-0.0963721	-0.216024	0.522558	-0.117629	0.196371	-0.0588353	0.188818
REACTOME_DECTIN_1_MEDIATED_NONCANONICAL_NF_KB_SIGNALING	-0.20415	-0.0487692	-0.310099	-0.127553	0.150812	-0.00797708	0.112989	0.0110879	-0.0318281	-0.171072	-0.112818	-0.000304256	-0.203728	-0.194792	0.331509	-0.218361	0.134115	-0.256775	0.0163223	0.0387081	-0.156204	0.282287	0.0584868	0.0643232	0.157078	-0.216542	-0.0619171	0.360585	0.0981716	-0.284683	0.0378988	0.156213	-0.228478	0.0909007	-0.0675304	-0.15905	0.0500558	0.0651559	-0.102818	-0.0205048	0.338244	0.106228	-0.014899	0.0199029	-0.21542	-0.182424	0.0587734	-0.114202	-0.199248
REACTOME_CLEC7A_DECTIN_1_SIGNALING	-0.137322	0.0222513	-0.225088	-0.0292891	0.0697514	-0.00504482	0.0918841	0.155479	-0.0236549	-0.0583333	-0.0345743	-0.0351649	-0.2004	-0.186629	0.214767	-0.141712	0.155787	-0.162215	0.0185212	0.0565296	-0.123697	0.231607	0.025521	0.0421	0.186001	-0.132544	-0.12579	0.354584	0.0326666	-0.239198	0.0317554	0.0612443	-0.151157	0.202622	-0.0939822	-0.170676	0.0365408	-0.00960317	-0.120728	-0.0439177	0.305753	-0.00309205	-0.0312379	0.00803991	-0.0951635	-0.174954	-0.0125438	-0.115227	-0.205784
REACTOME_DISEASES_ASSOCIATED_WITH_GLYCOSYLATION_PRECURSOR_BIOSYNTHESIS	0.201188	-0.285637	0.100301	-0.378786	-0.386275	-0.482743	-0.29966	-0.204959	-0.45644	-0.02261	-0.0829946	-0.018574	0.187932	0.228673	-0.0221836	0.162357	0.148118	0.142906	0.0370704	-0.121001	0.0409016	-0.275171	-0.254803	0.0964769	-0.452713	0.184019	0.0196242	-0.288641	0.0118809	0.0508511	-0.276064	-0.031285	-0.020602	0.249717	0.214556	0.0720727	0.0952503	0.14959	-0.163229	-0.175724	-0.0993783	0.0260712	0.0478129	0.0905295	0.416799	0.482849	0.0204102	0.336155	0.0868431
REACTOME_DEGRADATION_OF_GLI1_BY_THE_PROTEASOME	-0.343446	-0.0787542	-0.337973	-0.128702	0.100836	-0.0963314	0.0269339	-0.0600705	0.013294	-0.119307	-0.135984	0.0706047	-0.154974	-0.125254	0.331265	-0.202504	0.102382	-0.267325	-0.0430836	-0.0182696	-0.128363	0.331697	0.0409969	-0.0453837	0.0773172	-0.31596	-0.0687521	0.349999	0.015331	-0.222999	-0.01314	0.110779	-0.211937	0.0672128	-0.0242613	-0.150544	0.0923	0.0918633	-0.191071	-0.0582088	0.289243	0.0667269	0.0200114	-0.0388251	-0.209838	-0.233242	0.0230742	-0.0709999	-0.161307
REACTOME_HEDGEHOG_OFF_STATE	-0.0336012	0.168378	-0.382817	0.115304	-0.114473	-0.183862	0.0481261	0.0124369	-0.0610169	-0.281796	-0.281303	0.0936248	-0.182026	-0.247232	0.114697	-0.255726	-0.0709356	-0.227038	-0.140537	0.1074	-0.0677277	0.243969	0.0597378	-0.190165	0.225764	-0.300968	-0.133433	0.285929	0.150942	-0.273408	-0.0509929	0.0111941	-0.308166	-0.013537	-0.091591	-0.250083	0.0785252	-0.118531	-0.0542109	-0.00484435	0.1717	0.0711531	-0.069958	0.00804117	-0.0415416	-0.198092	-0.0652632	0.0643649	-0.223432
REACTOME_ACTIVATION_OF_ANTERIOR_HOX_GENES_IN_HINDBRAIN_DEVELOPMENT_DURING_EARLY_EMBRYOGENESIS	0.333775	-0.212211	-0.224954	-0.191237	0.220751	-0.21765	0.163592	-0.280983	-0.0965733	-0.0063797	0.566207	-0.502438	-0.05561	-0.2844	-0.294802	0.0428228	-0.00622412	-0.135326	0.272608	-0.409134	-0.158477	0.280272	-0.289637	-0.224513	0.186877	0.336596	-0.146009	-0.240413	-0.368616	0.0829809	-0.00520009	0.0509257	0.513358	-0.143713	-0.227994	0.258722	-0.0241785	-0.0532923	-0.459283	0.0946816	-0.167138	-0.283615	-0.349908	0.298409	0.145722	-0.568559	0.0829974	-0.445422	0.00120489
REACTOME_CILIUM_ASSEMBLY	0.310445	0.25377	-0.17556	0.145169	-0.123302	0.0228144	0.125693	0.141196	-0.0434515	-0.177893	-0.153952	0.0636418	-0.235159	-0.281706	-0.107499	-0.3293	-0.286764	-0.0933947	-0.334784	-0.0647111	0.171332	-0.0209771	-0.0763897	-0.246967	0.172661	-0.122305	-0.0918595	-0.256241	0.138305	-0.215843	-0.149127	-0.0843131	-0.294387	-0.025107	-0.122099	-0.210343	-0.123368	-0.372775	0.0528837	-0.16503	-0.193152	-0.111912	-0.166606	-0.0919683	0.0277628	-0.180021	-0.210243	-0.0145003	-0.0722981
REACTOME_ABC_TRANSPORTER_DISORDERS	-0.296035	0.00294509	-0.218614	-0.087898	0.122101	0.0232059	0.0613801	0.0209682	0.0762356	-0.0229426	-0.0235321	-0.0522523	-0.0502867	-0.172003	0.285446	-0.147308	0.0597896	-0.0852869	-0.0316037	-0.0331756	-0.0945346	0.200344	-0.0169791	0.0890455	-0.0475585	-0.263929	-0.00425827	0.244757	-0.0185953	-0.191416	-0.0256296	0.0882537	-0.222136	-0.0591418	0.0157017	-0.166742	0.165139	0.0794981	-0.181364	0.0206404	0.140132	0.00297489	-0.0303498	-0.025419	-0.211024	-0.194493	0.00783752	-0.0104024	-0.139601
REACTOME_SLC_TRANSPORTER_DISORDERS	-0.126195	-0.293541	-0.0957915	-0.0811359	0.20529	-0.0635831	-0.0288257	0.165489	-0.0995793	-0.0297313	-0.0474577	-0.0259176	0.109639	0.0839612	0.0515877	-0.0930122	0.231892	0.0135794	0.0622916	0.132287	0.242108	-0.0629954	0.149881	0.126624	0.146502	0.0949182	0.00683352	0.166236	0.0500766	0.203892	-0.0739712	0.187261	0.0587485	-0.0250321	0.153112	-0.0051411	0.221088	0.11642	0.0189181	-0.115289	0.131239	-0.0816534	0.13894	-0.0271832	0.0321041	-0.108351	0.0800705	-0.130981	-0.0367242
REACTOME_DISORDERS_OF_TRANSMEMBRANE_TRANSPORTERS	-0.245028	-0.144633	-0.184491	-0.0816212	0.16394	-0.0241827	0.0182091	0.0789324	-0.00890114	-0.0171523	-0.0338112	-0.0318166	0.0242945	-0.0754486	0.176317	-0.119536	0.141312	-0.0178864	-0.00268984	0.0539919	0.0579852	0.112462	0.0650443	0.110535	0.0645766	-0.0937641	-0.000312457	0.207956	-0.0070933	-0.0198931	-0.0722143	0.0840565	-0.109284	-0.0153719	0.0895866	-0.101559	0.182014	0.0804548	-0.0781907	-0.0614079	0.144528	-0.0914803	0.0383314	-0.0403748	-0.111123	-0.153371	0.0624493	-0.0792542	-0.0799815
REACTOME_ANCHORING_OF_THE_BASAL_BODY_TO_THE_PLASMA_MEMBRANE	0.329464	0.319087	0.0045203	0.157392	0.0761275	0.151519	0.254718	0.253837	0.0272332	-0.108923	-0.254484	0.159467	-0.0280738	0.137504	0.0541065	-0.269988	0.0310595	-0.118045	-0.206758	0.0709985	0.0819408	0.243154	0.108731	-0.105122	0.289228	-0.0831492	-0.0481554	-0.0843354	0.079333	-0.104953	-0.191955	-0.131917	-0.0443652	0.111561	0.112506	-0.00559137	0.156578	-0.19585	0.180549	-0.0434938	0.0687859	0.124842	0.008662	0.0560981	0.126524	0.172437	0.0541093	0.0952982	-0.193374
REACTOME_VXPX_CARGO_TARGETING_TO_CILIUM	0.261469	0.0163791	0.207373	-0.170941	0.38113	0.335798	0.0896323	-0.0707908	0.392535	0.23373	0.50205	0.0393933	-0.322719	-0.160868	0.162637	0.00503205	-0.207298	0.194175	0.33435	-0.319918	0.27529	-0.128279	0.292696	-0.312298	0.172921	0.149933	0.0459673	-0.278061	0.0403658	-0.366191	0.332841	0.345929	0.199857	0.233584	-0.0428038	0.46526	-0.00307582	-0.275243	-0.0389754	-0.154469	-0.0807444	-0.083298	-0.0322364	-0.385973	-0.189151	-0.459319	0.20708	-0.295806	-0.104585
REACTOME_CARGO_TRAFFICKING_TO_THE_PERICILIARY_MEMBRANE	0.125993	0.0681688	0.0449708	-0.131906	0.157479	0.161517	0.0081829	-0.0796472	0.186364	0.0739618	0.36207	-0.151502	-0.295019	-0.30812	0.107708	-0.40516	-0.174017	-0.180737	-0.175573	-0.216484	0.246255	-0.178185	-0.0608423	-0.245382	-0.239644	-0.0217783	-0.0378562	-0.421379	0.0281243	-0.229872	0.211448	-0.0124871	0.0281906	-0.224033	-0.21093	0.221794	-0.266494	-0.457938	-0.288548	-0.460488	-0.274923	-0.207701	-0.334657	-0.35774	-0.364058	-0.524682	-0.116641	-0.189408	0.0610867
REACTOME_INTRAFLAGELLAR_TRANSPORT	0.577761	0.491587	-0.61568	0.455405	-0.412205	-0.122957	0.172056	0.244594	-0.115661	-0.528344	-0.345256	0.240154	-0.13651	-0.482655	-0.357922	-0.276286	-0.522862	0.167141	-0.476928	0.234314	0.258966	0.0780235	0.158297	-0.360064	0.499132	-0.00363146	-0.063922	-0.0916622	0.402166	-0.240971	-0.447748	-0.0395928	-0.584414	-0.110927	-0.11239	-0.5513	0.151385	-0.507196	0.32643	0.400015	-0.181602	0.224202	-0.145324	0.0962663	0.290342	-0.00492994	-0.378315	0.356903	-0.138881
REACTOME_DECTIN_2_FAMILY	-0.14066	0.211122	0.131691	0.120895	-0.0326778	-0.145517	0.121005	0.428165	-0.148004	0.127703	0.0740193	-0.0752912	-0.0759519	0.360469	0.311101	0.264613	-0.0680794	-0.033701	0.220047	-0.0367199	0.217208	0.172985	0.383703	0.124564	-0.0666908	0.292377	0.409734	0.294585	0.144659	0.259648	0.226486	0.214389	0.267715	0.308792	0.15059	0.44337	0.1557	0.27954	-0.183069	0.449169	0.272592	-0.211992	0.261029	0.0462973	0.0929013	0.0775816	-0.101187	0.333938	0.517796
REACTOME_C_TYPE_LECTIN_RECEPTORS_CLRS_	-0.207732	0.031142	-0.188697	-0.010647	-0.00341738	-0.000404414	0.116448	0.142272	0.038686	0.012703	-0.0919815	0.0438781	-0.0620477	-0.0856518	0.242852	-0.0191079	0.108381	-0.178223	0.124575	0.127045	-0.0354111	0.227156	0.0405129	0.0191218	0.15646	-0.0805878	-0.0497354	0.277914	0.072317	-0.13012	0.0399605	0.103436	-0.0426425	0.184871	-0.0636714	-0.0440208	0.0385507	0.0367126	-0.0689278	-0.0159176	0.27483	-0.0257304	0.0537605	0.010195	-0.0972361	-0.0784532	-0.0214507	-0.0218299	-0.0541038
REACTOME_CD209_DC_SIGN_SIGNALING	-0.336008	0.054914	0.201505	0.260067	-0.184271	0.203463	0.243187	0.144503	0.340958	0.285375	-0.332884	0.346178	0.399342	0.165463	0.121714	0.40865	0.0209731	-0.172197	0.382618	0.419736	0.335331	0.298167	-0.0172493	0.207463	0.180059	0.336398	0.266187	0.00838565	0.106065	0.208738	-0.0329566	0.19562	0.389573	0.0900901	0.177147	0.150231	-0.0512749	-0.0952949	0.146674	-0.0811324	0.134667	-0.0358613	0.181866	-0.150432	-0.0392852	0.528605	-0.038072	0.297532	0.281189
REACTOME_RHO_GTPASES_ACTIVATE_PKNS	0.478175	-0.285926	-0.164307	-0.239569	0.0544901	-0.468284	-0.139327	-0.408923	-0.161111	-0.201154	0.235798	-0.381635	-0.0202327	-0.191544	-0.357079	-0.104107	-0.0590562	-0.132406	0.0437401	-0.482333	-0.165226	-0.0649919	-0.318363	-0.291437	0.104127	-0.131508	-0.32945	-0.174893	-0.271722	-0.0255601	0.00132771	0.0700967	0.479724	-0.21676	-0.113456	0.142145	0.0793595	-0.0480479	-0.0966147	0.266582	-0.240031	0.0305651	-0.303877	0.133333	0.105051	-0.560701	0.0912392	-0.228181	-0.0712204
REACTOME_ACTIVATED_PKN1_STIMULATES_TRANSCRIPTION_OF_AR_ANDROGEN_RECEPTOR_REGULATED_GENES_KLK2_AND_KLK3	0.372815	-0.498867	-0.337013	-0.415478	0.111948	-0.418359	0.00903866	-0.428843	-0.384234	-0.157672	0.593635	-0.613281	-0.0866195	-0.29939	-0.420661	0.108833	-0.102166	-0.204209	0.331811	-0.554479	-0.275366	0.291452	-0.374034	-0.331182	0.239195	0.251692	-0.229767	-0.333835	-0.480425	0.0500412	-0.0368598	-0.0243346	0.647923	-0.253843	-0.159711	0.286223	-0.0135112	0.0162514	-0.51851	0.133502	-0.187002	-0.287226	-0.424159	0.352898	0.150544	-0.69572	0.150766	-0.46568	-0.112973
REACTOME_RHO_GTPASES_ACTIVATE_CIT	0.390918	0.242188	0.349825	-0.104747	-0.191383	-0.309478	-0.0453598	-0.587029	0.469974	-0.007755	0.0164511	0.00480764	0.265907	-0.188691	-0.275823	-0.638683	-0.178822	-0.338566	-0.289183	-0.511137	-0.167141	-0.611518	-0.144457	-0.186135	-0.0949596	-0.424748	-0.367995	0.0422782	0.0407796	-0.288449	-0.3136	0.121018	0.168708	0.108103	0.412593	-0.243151	0.356119	-0.40546	0.605072	0.146659	-0.550647	0.233891	0.219845	-0.145049	-0.187368	-0.442403	0.0570724	0.389957	0.178062
REACTOME_RHO_GTPASES_ACTIVATE_IQGAPS	0.510146	0.231343	-0.511615	0.176443	-0.502319	-0.269671	0.148702	0.413103	-0.383427	-0.431399	-0.3567	0.361964	-0.11235	-0.331073	-0.434349	-0.218099	-0.254988	0.122713	-0.391532	0.345341	0.140015	-0.109746	0.035338	-0.263038	0.321402	-0.389284	-0.199513	0.10032	0.336417	-0.135572	-0.337422	0.173406	-0.498165	-0.06728	-0.0579688	-0.358288	-0.128344	-0.285784	0.407016	0.336759	-0.284036	0.0286196	-0.179677	-0.119796	0.293988	-0.333922	-0.353533	0.0961347	-0.267935
REACTOME_RHO_GTPASES_ACTIVATE_ROCKS	0.484861	0.0115594	0.385026	0.0689877	-0.310894	-0.245885	-0.118636	-0.492861	0.353827	-0.104724	-0.114088	0.0338056	0.27077	-0.413442	-0.342137	-0.564589	-0.155877	-0.296965	-0.304839	-0.353011	-0.137073	-0.488837	-0.346728	-0.408879	-0.0667411	-0.228117	-0.492193	-0.0490711	0.119082	-0.361775	-0.14405	0.0148409	0.298559	-0.026543	0.293229	-0.232887	0.375988	-0.293975	0.524969	0.0387765	-0.336585	0.316651	-0.0850529	-0.0137727	0.0593926	-0.397323	0.0411878	0.284474	0.161548
REACTOME_RHO_GTPASES_ACTIVATE_PAKS	0.385023	-0.0171171	0.117642	-0.210026	-0.319676	-0.372626	-0.135054	-0.555417	0.247677	0.108927	0.13135	-0.0443382	0.433983	-0.0661675	-0.177596	-0.326355	-0.263922	-0.274907	-0.0246071	-0.42391	-0.308939	-0.53962	-0.118649	-0.263621	-0.130857	-0.101812	-0.261766	-0.0626767	0.180821	-0.119148	-0.0833181	0.311958	0.337715	0.0389947	0.134343	0.00262783	0.386496	0.0029939	0.552664	0.331644	-0.446309	0.306244	0.181142	0.0197736	-0.247063	-0.253515	0.12497	0.329713	0.246365
REACTOME_TP53_REGULATES_METABOLIC_GENES	0.225654	-0.0592302	-0.119396	0.114501	0.130962	-0.0692578	-0.08542	0.0261008	-0.253802	-0.182048	-0.334545	0.0808891	0.224107	-0.00872687	-0.208137	0.079989	-0.00174549	0.0950361	0.108981	0.12286	-0.00770346	0.15254	0.0853784	-0.0427369	0.128905	-0.110567	-0.208208	0.0626958	-0.193477	0.046024	0.236593	0.011081	0.148367	0.148864	-0.0352068	0.0367611	0.0865962	0.1456	0.202134	0.0928704	0.14905	0.336695	-0.0612066	-0.317441	-0.0856375	-0.267341	-0.0429222	-0.083975	0.077342
REACTOME_HEDGEHOG_ON_STATE	-0.328775	-0.120393	-0.308969	-0.151073	0.0690882	-0.125139	-0.0416688	-0.0904487	-0.146375	-0.171518	-0.194852	-0.0697922	-0.197584	-0.197647	0.275007	-0.227795	0.0503731	-0.296675	-0.0147852	0.00468306	-0.143832	0.278885	-0.0305093	-0.0370397	-0.00417745	-0.252513	-0.020509	0.346568	-0.0110579	-0.222609	-0.0580218	0.194182	-0.27795	0.0582008	-0.0708168	-0.185454	0.137443	0.133978	-0.0477392	0.048601	0.211935	0.0503082	-0.0158554	0.024758	-0.15689	-0.251924	-0.0125532	-0.0467663	-0.190554
REACTOME_REGULATION_OF_TP53_ACTIVITY	-0.20329	0.175164	-0.0448845	0.107942	0.210537	0.0987293	0.0853392	0.279152	0.115404	-0.00514791	0.0501996	-0.13978	-0.0716227	-0.0234717	0.0477494	-0.174484	-0.115137	-0.166942	-0.135856	0.0651276	-0.235164	0.204899	0.113998	0.157371	-0.17293	0.132024	-0.102913	0.218314	-0.0929236	-0.0480471	-0.279715	-0.136969	-0.076214	-0.0217314	-0.215652	-0.0732723	-0.14066	-0.08526	-0.172489	0.0591341	0.0231309	-0.101178	0.0257118	-0.0272235	-0.338744	-0.297197	-0.0974076	-0.277796	-0.106485
REACTOME_TP53_REGULATES_TRANSCRIPTION_OF_CELL_DEATH_GENES	-0.294837	-0.00787533	-0.31111	-0.0425146	-0.209594	0.019213	-0.0588569	-0.299854	-0.16054	-0.0357292	-0.296706	-0.342397	-0.311204	0.106549	-0.320084	-0.0410357	-0.340557	-0.176015	0.0247871	-0.231673	-0.168833	-0.334555	-0.105487	0.124352	-0.357581	-0.189313	-0.0875017	-0.255778	-0.000752966	-0.235818	0.0483507	-0.348377	0.0286918	-0.34237	0.0401055	-0.470732	-0.362275	-0.3651	-0.214978	-0.316319	-0.149295	0.116169	0.0108465	-0.0546499	-0.489419	-0.0737273	-0.291469	-0.381827	-0.179706
REACTOME_CONSTITUTIVE_SIGNALING_BY_EGFRVIII	0.281701	0.579862	0.0360434	0.449882	0.465805	0.449854	0.159442	0.463931	0.153889	0.302563	0.525035	0.0909118	0.389321	0.582818	0.435482	0.402998	0.0697275	0.461615	0.486678	0.0833652	0.638042	0.573551	0.319732	0.613265	0.278609	0.47025	0.561494	0.317929	0.408698	0.290029	0.524117	0.374592	0.639527	0.670368	0.575948	0.495976	0.319746	0.207489	0.453683	0.437839	0.676595	0.474743	0.553103	0.464229	0.115046	0.557906	0.055111	0.499058	0.645346
REACTOME_PCNA_DEPENDENT_LONG_PATCH_BASE_EXCISION_REPAIR	0.0693609	-0.0145361	0.145952	0.130841	0.067734	0.0367953	0.117837	-0.0321713	0.323071	0.146067	-0.0461611	-0.266251	0.154286	0.14788	0.212211	-0.220747	-0.00211974	-0.156473	-0.210956	0.0166217	-0.376238	0.118895	-0.0653674	0.00679511	0.0493411	0.0120355	-0.00575921	0.124154	-0.383083	-0.203946	-0.345763	-0.200153	-0.0386956	0.0527081	-0.257717	-0.149133	-0.207917	-0.0885251	-0.112338	-0.223829	-0.0940557	-0.406165	0.0570532	-0.0610615	-0.000841761	0.0841136	-0.185963	-0.304778	-0.252982
REACTOME_VESICLE_MEDIATED_TRANSPORT	0.0959042	0.0500295	0.041175	0.0436393	0.0461441	0.0142903	0.0418266	0.0572506	0.0284017	-0.0863453	-0.0346023	-0.00780395	-0.0682489	-0.090077	-0.103511	-0.087433	-0.102238	-0.0362848	-0.0113999	0.0420765	-0.0594136	-0.0868441	0.0518565	-0.0966567	-0.0637756	-0.152036	-0.13223	-0.0818657	-0.0336356	-0.0422985	-0.119806	-0.0368436	-0.0965302	-0.116675	-0.113199	-0.0624579	0.0582606	-0.0743852	0.0597477	0.0262829	-0.0939127	0.0710929	0.0638785	0.0116766	-0.0418298	-0.0413449	0.0138366	0.0163182	-0.0252723
REACTOME_NEGATIVE_REGULATION_OF_FGFR1_SIGNALING	-0.493741	0.169845	-0.403215	-0.124624	0.419448	0.341161	0.157268	0.158515	0.172104	-0.37212	-0.296107	0.133095	0.421437	0.223225	0.540419	-0.105524	0.195632	0.0101727	0.363375	-0.151919	-0.226389	0.358793	0.527793	0.385156	0.173969	-0.126061	0.0850441	0.481453	-0.057198	0.502672	-0.186939	0.360511	0.0195808	0.242672	-0.0381239	0.431691	0.569881	0.474952	0.443337	0.498992	0.474213	0.517082	0.574904	0.506103	-0.0190165	-0.399871	0.204426	0.376705	-0.0783739
REACTOME_NEGATIVE_REGULATION_OF_FGFR2_SIGNALING	-0.407136	0.312608	-0.445033	-0.21704	0.451086	0.335164	0.309306	0.117666	0.0131441	-0.378848	-0.200903	0.0473991	0.470604	0.17236	0.566628	-0.103338	0.235656	0.0098269	0.395299	-0.153389	-0.138671	0.487726	0.559888	0.497954	0.180719	-0.114094	0.0875385	0.548156	-0.11938	0.484125	-0.191315	0.321695	-0.0807396	0.241078	-0.113419	0.390613	0.548164	0.563589	0.410779	0.49399	0.548911	0.489803	0.598271	0.503365	-0.102966	-0.361233	0.159729	0.365732	-0.0841623
REACTOME_NEGATIVE_REGULATION_OF_FGFR3_SIGNALING	-0.423162	0.327077	-0.468573	-0.247491	0.470908	0.352586	0.327226	0.122464	0.0140364	-0.388556	-0.206619	0.0468261	0.482616	0.173143	0.585185	-0.107411	0.253486	0.0114432	0.408741	-0.154898	-0.14491	0.510408	0.581174	0.519033	0.193449	-0.112539	0.0913475	0.575434	-0.123146	0.498326	-0.195781	0.338144	-0.0832747	0.263729	-0.115174	0.40386	0.576909	0.569869	0.426901	0.505553	0.579049	0.504015	0.612884	0.519613	-0.103577	-0.371935	0.163222	0.378516	-0.0878998
REACTOME_NEGATIVE_REGULATION_OF_FGFR4_SIGNALING	-0.423162	0.327077	-0.468573	-0.247491	0.470908	0.352586	0.327226	0.122464	0.0140364	-0.388556	-0.206619	0.0468261	0.482616	0.173143	0.585185	-0.107411	0.253486	0.0114432	0.408741	-0.154898	-0.14491	0.510408	0.581174	0.519033	0.193449	-0.112539	0.0913475	0.575434	-0.123146	0.498326	-0.195781	0.338144	-0.0832747	0.263729	-0.115174	0.40386	0.576909	0.569869	0.426901	0.505553	0.579049	0.504015	0.612884	0.519613	-0.103577	-0.371935	0.163222	0.378516	-0.0878998
REACTOME_SIGNALING_BY_FGFR1	-0.322155	0.28044	-0.244938	0.103673	0.409262	0.416225	0.260356	0.255032	0.22033	-0.215309	-0.0797001	0.266829	0.481637	0.360272	0.509618	0.0958934	0.378514	0.0926996	0.440818	0.0266103	-0.0512282	0.395797	0.527409	0.461555	0.326463	-0.00480974	0.244052	0.545432	0.0868385	0.56564	-0.0148835	0.398379	0.151602	0.36427	0.0246561	0.466799	0.60916	0.501562	0.489093	0.403458	0.525731	0.550446	0.622259	0.501939	0.00957647	-0.253371	0.206517	0.377599	0.0312671
REACTOME_SIGNALING_BY_FGFR2	-0.0410786	0.325807	0.03901	0.00187755	0.274544	0.467021	0.243209	0.187141	0.226736	0.021632	0.0291021	0.255406	0.416884	0.178204	0.503544	0.150098	0.306515	0.105186	0.368788	0.0257823	0.167793	0.428625	0.496583	0.404758	0.301456	0.171123	0.160766	0.376949	0.0720225	0.333275	0.120149	0.318045	0.191764	0.136989	0.0729437	0.388037	0.232354	0.264873	0.29525	0.317451	0.493267	0.184077	0.444781	0.396029	-0.0147671	0.024837	0.103115	0.193568	0.109323
REACTOME_SIGNALING_BY_FGFR3	-0.244748	0.383238	-0.32829	-0.000924749	0.400859	0.381767	0.378357	0.213233	0.118715	-0.216171	0.00984596	0.203732	0.505733	0.343117	0.52601	0.0943381	0.405572	0.0907731	0.464555	0.0288689	0.0365376	0.50532	0.545854	0.539982	0.331556	0.00627963	0.246653	0.570282	0.0457787	0.569983	-0.0153022	0.363582	0.0750265	0.372126	-0.0334648	0.420853	0.582535	0.536416	0.456571	0.393476	0.613994	0.522866	0.638654	0.511255	-0.0564634	-0.225621	0.134612	0.364055	0.0306492
REACTOME_SIGNALING_BY_FGFR4	-0.257283	0.406332	-0.348095	-0.00657967	0.421119	0.400004	0.397867	0.223452	0.126428	-0.21863	0.0103555	0.206358	0.520741	0.348024	0.547742	0.0967472	0.425794	0.0954829	0.48081	0.0331325	0.0358537	0.531845	0.569142	0.562812	0.350483	0.0131819	0.255653	0.597269	0.0506514	0.586866	-0.0163744	0.382401	0.0769289	0.393376	-0.0315166	0.43541	0.612421	0.548482	0.474083	0.409644	0.644052	0.539665	0.655574	0.530233	-0.0541505	-0.230948	0.138042	0.378652	0.0299553
REACTOME_SIGNALING_BY_FGFR2_IN_DISEASE	0.445791	0.560837	0.517808	0.354536	0.141424	0.507785	0.389002	0.441958	0.384834	0.466011	0.424208	0.360008	0.35963	0.265568	0.510863	0.41059	0.402493	0.364874	0.454044	0.112867	0.595222	0.417585	0.239313	0.594662	0.385972	0.473691	0.35199	-0.00420918	0.069687	0.13631	0.393587	0.498503	0.219681	0.000535305	0.129124	0.389666	-0.0724086	0.0787377	0.0718088	0.146727	0.455288	0.0537041	0.300753	0.238436	0.208947	0.178951	-0.196964	-0.131694	0.315342
REACTOME_SIGNALING_BY_FGFR1_IN_DISEASE	0.101794	0.161494	0.248305	0.361066	0.351207	0.0493022	0.28888	0.254227	0.379857	0.084961	0.153289	0.232711	0.348332	0.261322	0.0956025	0.397572	0.225079	-0.0602068	0.299354	0.253583	0.313562	0.131546	0.0952992	-0.0881504	0.477509	0.380959	0.318028	0.284929	0.354145	0.325757	0.207353	0.331525	0.28516	0.277713	0.344101	0.287945	0.335513	0.21843	0.0518349	0.0640204	-0.0686993	0.0760919	0.335538	0.441639	0.245869	-0.0581917	0.135765	0.145226	0.303217
REACTOME_TRANSLESION_SYNTHESIS_BY_POLK	-0.616855	0.144226	-0.300331	0.1683	0.308983	0.341	0.146466	0.161062	0.294459	-0.473918	-0.456738	-0.439978	0.365894	-0.15414	0.183086	-0.594275	0.319271	-0.497355	0.0746122	0.184881	-0.587811	0.419479	0.285133	0.240843	-0.265096	-0.414183	0.0785788	0.380479	-0.0557558	0.28304	-0.501534	0.0253549	-0.373566	0.130163	-0.636236	0.0756786	-0.0969198	0.360385	0.315861	0.236962	0.455225	-0.0338615	0.358332	0.261257	-0.542756	-0.451025	-0.216278	-0.490634	-0.478628
REACTOME_TERMINATION_OF_TRANSLESION_DNA_SYNTHESIS	-0.480796	0.18131	-0.336438	0.00845249	0.191745	0.129814	0.25696	0.068746	-0.0289686	-0.303267	-0.455274	-0.0623294	0.497042	0.0371166	0.231593	-0.464344	0.382355	-0.179856	0.348494	0.20326	-0.437064	0.43126	0.402122	0.377121	0.159743	-0.117487	0.309009	0.442252	0.116128	0.37005	-0.244255	0.102801	-0.192638	0.406434	-0.284703	0.328569	0.0497822	0.358039	0.239311	0.329617	0.43654	0.0494627	0.406567	0.276503	-0.278416	-0.0304055	-0.0381684	-0.257969	-0.407092
REACTOME_REGULATION_OF_RAS_BY_GAPS	-0.345353	-0.0159677	-0.311734	-0.135827	0.0814723	-0.00557565	0.0252189	-0.054478	-0.0595544	-0.177582	-0.165799	0.0109072	-0.124535	-0.181611	0.325374	-0.189969	0.147345	-0.228463	0.0362122	0.0598869	-0.128309	0.292302	0.0897901	0.065712	0.0449809	-0.224652	0.0584045	0.366554	0.0372398	-0.23927	-0.00438303	0.205116	-0.251132	0.0643657	-0.071644	-0.144902	0.163525	0.138954	-0.0443317	0.0750194	0.297387	0.1156	-0.0101765	0.022394	-0.179433	-0.179561	0.0403265	-0.053103	-0.179284
REACTOME_DISEASES_OF_CARBOHYDRATE_METABOLISM	-0.303229	-0.10587	-0.223474	0.0330009	0.091267	0.167446	0.118056	0.209598	0.0402785	-0.345164	-0.254961	-0.107884	0.288503	-0.204186	-0.210853	-0.28843	0.0931802	-0.252165	0.0954943	-0.299505	-0.145382	0.137404	0.23089	0.0529551	-0.0216275	-0.16788	0.378346	0.222936	0.0207382	0.132794	-0.324261	0.183849	-0.297582	0.323136	-0.322354	0.080779	0.447477	0.309712	0.0409512	0.367303	0.438281	-0.0155696	0.186639	0.165362	-0.263158	-0.376642	0.235511	-0.172796	-0.331786
REACTOME_DISEASES_OF_SIGNAL_TRANSDUCTION_BY_GROWTH_FACTOR_RECEPTORS_AND_SECOND_MESSENGERS	-0.101287	-0.0693388	-0.1807	-0.087222	0.0446897	-0.039775	-0.02827	-0.0694835	-0.113819	-0.0688753	0.0164739	-0.0473732	0.0393155	0.0978106	0.0809753	-0.0279379	0.200889	-0.120202	-0.0123216	-0.0406101	-0.0550778	0.0320778	0.137122	0.0129716	0.0184051	-0.0770085	-0.027447	0.103124	-0.0531579	0.0361483	0.0514995	0.028158	-0.0517012	-0.00283882	0.0971368	0.0210192	0.055772	-0.0485676	0.0742304	0.0684222	0.157161	0.0999106	0.0676434	0.091633	-0.0346319	-0.187085	0.00154394	-0.000555701	-0.0331628
REACTOME_INFECTIOUS_DISEASE	0.0182024	0.00324291	-0.10576	-0.0512957	0.0739784	-0.0450024	-0.012679	0.0314699	-0.0870347	-0.070138	0.0528099	-0.0966592	-0.0427794	-0.157283	0.00945398	-0.0723442	-0.0415636	0.013354	0.0227243	0.019293	-0.062004	0.0970461	-0.0652893	-0.0658244	0.065083	0.0199539	-0.0993893	-0.00470785	-0.0527888	-0.0893927	-0.0826618	0.0421552	-0.0507833	-0.0497417	-0.0543673	-0.0411283	-0.0587927	0.0176806	0.00395238	-0.0136572	0.0390451	-0.00431599	-0.0497166	0.0344668	0.0243767	-0.182566	-0.0285086	-0.0101311	-0.0512547
REACTOME_RHO_GTPASES_ACTIVATE_WASPS_AND_WAVES	-0.218386	-0.167186	-0.301862	-0.102886	-0.0759283	-0.375553	-0.270582	-0.216202	-0.403041	-0.0172962	-0.0748813	0.237722	-0.119745	-0.062837	-0.0909621	-0.245747	0.0635289	0.0930351	-0.0331427	-0.127874	-0.306696	-0.377128	-0.118726	-0.329509	-0.0487728	-0.211729	-0.458025	-0.238712	-0.239853	-0.191712	-0.121069	0.334538	0.0944459	-0.273141	-0.0321794	-0.0751437	0.0537851	0.0593518	0.0281081	0.0442815	-0.185809	0.158501	-0.0543274	-0.30304	-0.211431	-0.252883	-0.147885	0.078132	0.134377
REACTOME_RHO_GTPASES_ACTIVATE_FORMINS	0.0932794	0.0941642	-0.123172	0.0673459	-0.123063	-0.187022	-0.0563038	0.115069	-0.0159844	-0.242943	-0.224002	0.0588496	-0.0775446	-0.209513	-0.0825417	-0.143427	-0.177119	-0.0883759	-0.126793	0.0818866	-0.00506061	-0.0092118	-0.0479674	-0.240898	0.0909595	-0.16476	-0.186147	-0.0489595	0.0808428	-0.200179	-0.162894	-0.0677599	-0.243893	-0.0719033	0.164959	-0.157311	0.0182749	-0.275665	0.0607283	0.0459876	-0.228323	-0.0879154	-0.00158839	0.0482074	0.199835	-0.187662	-0.123619	-0.0599669	-0.0315116
REACTOME_TNFR2_NON_CANONICAL_NF_KB_PATHWAY	-0.212157	-0.0874603	-0.353987	-0.158808	0.122556	-0.0357912	0.0822795	-0.0208369	-0.0535009	-0.205624	-0.143151	-0.0341992	-0.214238	-0.195421	0.329787	-0.21933	0.117114	-0.25296	-0.0186951	0.0215936	-0.192034	0.261184	0.0298467	0.0323151	0.13491	-0.241357	-0.0916073	0.35577	0.0781025	-0.280429	0.016585	0.137311	-0.222697	0.100042	-0.103718	-0.158789	0.0641145	0.0657438	-0.11201	-0.0209435	0.314106	0.0935561	-0.0282398	0.0199099	-0.252931	-0.227488	0.0244459	-0.116756	-0.200611
REACTOME_RHO_GTPASES_ACTIVATE_NADPH_OXIDASES	-0.205883	0.1028	-0.397321	-0.0492738	0.40594	-0.0124076	-0.118422	-0.0132431	-0.00244202	0.0815892	0.321376	-0.0917917	-0.210978	0.203407	0.370027	-0.305813	-0.0138327	0.20582	0.287823	-0.113675	0.0241747	-0.098477	-0.0594633	-0.33801	0.233301	0.242985	-0.119801	-0.0353928	0.114899	0.0678436	0.22276	0.175009	-0.154313	-0.17672	0.0732057	0.179081	-0.00190463	0.219861	0.194261	0.0750617	-0.0341337	0.38	0.1262	-0.227036	-0.304342	-0.26304	-0.415112	-0.0894642	0.174628
REACTOME_DISEASES_OF_METABOLISM	-0.11029	-0.00732043	-0.029748	-0.0973559	-0.0727623	-0.0196481	0.0204909	-0.0439842	0.0100411	-0.0599116	-0.126653	-0.105022	0.0118962	-0.0349761	0.028747	0.0269598	-0.0445124	-0.0466661	0.00220812	-0.110545	-0.0735646	-0.0394138	-0.0430257	0.0991293	-0.0842237	-0.091629	0.070399	0.0109928	-0.00508872	0.00588699	-0.0231098	0.081168	-0.0641586	0.0805227	-0.128688	-0.0287892	0.107894	0.119585	0.0227015	-0.0459136	0.0119747	-0.134711	-0.0144502	-0.0163661	-0.0430428	-0.12232	-0.0369808	-0.0754119	-0.176755
REACTOME_RAF_ACTIVATION	-0.0735864	-0.224162	-0.260256	0.019945	-0.300898	-0.333335	-0.449699	-0.182856	-0.0863845	0.0778017	-0.0109347	-0.0835147	0.513087	0.360611	0.2848	0.149995	0.233981	-0.0975855	0.259326	-0.154044	0.146827	0.0251353	0.384224	-0.0257531	0.28169	-0.0696113	-0.200023	0.237168	-0.262424	0.340888	0.400394	0.0621905	0.287305	0.388687	0.305227	0.408452	0.19462	0.221422	0.275359	0.265199	0.049295	0.196435	0.177555	0.297726	0.433865	-0.0961315	0.203097	0.230055	-0.0358726
REACTOME_MAP2K_AND_MAPK_ACTIVATION	0.192726	-0.0603711	-0.24492	-0.433457	0.153387	-0.212783	-0.36622	-0.392141	-0.575161	-0.316056	-0.100267	0.0296735	-0.159059	-0.0388521	-0.121762	-0.236049	0.0724906	0.0352891	-0.131661	-0.0131739	-0.347943	-0.366148	0.193576	0.0373803	-0.282821	-0.346854	0.00138219	-0.120674	-0.107969	-0.151217	0.19755	-0.0711108	-0.178205	-0.131433	0.00341691	-0.126677	0.139138	-0.0880433	0.546282	0.198296	0.0597382	0.432402	-0.0107735	0.371974	0.29586	-0.135832	-0.182055	0.0931806	-0.238074
REACTOME_NEGATIVE_REGULATION_OF_MAPK_PATHWAY	-0.424713	0.0252833	-0.502755	-0.180941	0.256677	0.144442	0.224328	0.0704917	-0.211917	-0.482077	-0.324282	0.123985	0.405297	0.123018	0.549968	-0.0697254	0.344535	-0.0720478	0.189537	0.111168	-0.173684	0.401549	0.547466	0.425586	0.263854	-0.122471	0.216275	0.50797	0.135439	0.469015	0.141954	0.26977	-0.0817331	0.159627	-0.0656509	0.353482	0.273777	0.493069	0.514539	0.464318	0.434763	0.440977	0.479296	0.505084	-0.219943	-0.266065	0.0681665	0.185662	-0.146811
REACTOME_DEFECTIVE_CFTR_CAUSES_CYSTIC_FIBROSIS	-0.287659	-0.0226547	-0.266042	-0.0950762	0.101266	0.0222493	0.0630835	0.0465535	0.0295526	-0.0568413	-0.0208317	-0.0268853	-0.0727293	-0.171587	0.327378	-0.166525	0.0766575	-0.149215	-0.0117881	-0.00320345	-0.0928429	0.243112	-0.0205739	0.100405	0.021681	-0.245746	-0.000491921	0.301552	-0.000720123	-0.234057	-0.0339793	0.103814	-0.25697	-0.000654889	-0.0219551	-0.20295	0.147442	0.060524	-0.184235	-0.0208946	0.217549	0.0758695	-0.0103774	0.00333785	-0.205552	-0.206599	0.015348	-0.0500496	-0.171051
REACTOME_MAPK_FAMILY_SIGNALING_CASCADES	-0.135934	-0.0228627	-0.173143	-0.116915	0.0717889	0.0147425	-0.0762254	-0.10268	-0.0534613	-0.0257581	-0.0269085	0.00705335	-0.0478944	-0.0144148	0.0616181	-0.0912122	0.0492332	-0.137473	-0.0253588	0.0294368	-0.112048	-0.0719353	0.045782	-0.0143854	-0.0282526	-0.223491	-0.0214847	0.0628511	-0.113756	-0.0180792	-0.0201221	0.0232072	-0.04259	-0.0821733	0.120677	0.0111145	0.0359765	0.0105	0.155272	0.0192827	0.0795977	0.147731	-0.047523	0.00950975	-0.0986768	-0.170272	-0.0436056	0.0806707	-0.0268654
REACTOME_SURFACTANT_METABOLISM	0.26712	0.278186	0.186602	0.469668	-0.00894897	0.398642	-0.0759529	0.270081	-0.101037	0.257589	-0.138653	0.410268	0.0402493	0.0130012	0.099484	0.210622	0.250537	-0.246092	0.0561056	0.162524	0.139035	-0.189771	-0.274864	0.348532	0.192597	0.0358782	0.387184	0.493191	-0.164693	-0.257385	0.210723	0.202927	0.402217	0.0512643	0.251008	0.358536	0.266731	0.0852742	0.0718187	-0.187282	0.314125	-0.22545	-0.273581	-0.020911	-0.271083	-0.00743276	-0.0235471	0.0933763	0.0682727
REACTOME_MAP3K8_TPL2_DEPENDENT_MAPK1_3_ACTIVATION	-0.505388	-0.0384105	-0.558008	0.0225921	0.378722	0.330159	0.454876	0.382372	0.0574931	-0.651434	-0.505348	-0.355406	0.109703	-0.333127	0.00174244	-0.506184	0.162447	-0.664376	0.0122447	-0.319782	-0.650951	0.492154	0.523303	0.217909	-0.0894557	-0.713964	-0.415694	0.612803	0.332612	0.115047	-0.268676	-0.40337	-0.368786	-0.0742292	-0.569248	-0.133286	0.0448942	0.239903	0.0844739	0.320014	0.485697	0.0557331	0.315983	0.0617871	-0.773191	-0.621459	0.153026	-0.521931	-0.73372
REACTOME_HDR_THROUGH_SINGLE_STRAND_ANNEALING_SSA_	-0.120546	0.253431	0.225344	0.405982	0.0496073	0.157682	0.0569719	0.337268	0.286462	0.459854	0.198064	-0.30578	-0.141015	-0.154964	0.0330185	-0.203861	-0.405978	-0.195343	-0.356664	0.101653	-0.235623	-0.240729	-0.276379	-0.0861048	-0.390498	0.178069	-0.0846629	-0.237348	-0.253293	-0.230894	-0.280196	-0.244602	-0.0832672	-0.06137	-0.211348	-0.294271	-0.182707	-0.111377	-0.147241	-0.438798	-0.329449	-0.399967	-0.284239	-0.30077	-0.380447	-0.346684	-0.255753	-0.462734	-0.320859
REACTOME_HDR_THROUGH_HOMOLOGOUS_RECOMBINATION_HRR_	-0.337365	0.319476	0.0321415	0.408364	0.233923	0.342011	0.17699	0.39444	0.285039	-0.253082	-0.113543	-0.200841	0.285555	-0.0348958	0.203147	-0.364448	0.105391	-0.333198	0.0400786	0.238391	-0.305844	0.23403	0.262318	0.325116	-0.131238	-0.0835285	0.25615	0.312002	0.083759	0.276439	-0.266376	0.0980443	-0.180845	0.181616	-0.327864	-0.0107919	0.0821619	0.327974	0.266568	0.122095	0.313142	-0.0744346	0.318075	0.128653	-0.433105	-0.317831	0.0485476	-0.337907	-0.28503
REACTOME_REGULATION_OF_TLR_BY_ENDOGENOUS_LIGAND	0.462965	-0.0921565	0.276502	-0.392841	0.29826	-0.569033	-0.509094	-0.491488	-0.475286	-0.270057	-0.0949986	-0.565289	-0.491764	0.109907	-0.190645	-0.653906	-0.604988	-0.638437	-0.131681	0.139048	-0.655086	-0.632603	-0.141556	-0.474436	-0.521261	-0.496221	-0.394917	-0.387831	-0.507376	-0.224736	-0.281281	-0.681403	-0.781457	-0.479916	-0.36478	-0.0895359	0.293973	0.44543	0.478068	0.441721	-0.048943	0.570435	0.220618	0.405089	0.278487	-0.0233622	0.284061	-0.309063	0.297352
REACTOME_MAPK6_MAPK4_SIGNALING	-0.243074	0.0274159	-0.238823	-0.139003	0.0764344	-0.0236983	0.0163807	-0.0354722	-0.0771605	-0.0187928	-0.0948212	0.0364354	-0.150818	-0.148117	0.217282	-0.238631	-0.0377595	-0.226033	-0.0783892	0.0470662	-0.0940293	0.230378	-0.0188491	-0.0152796	-0.0734706	-0.293447	-0.125022	0.183281	-0.196304	-0.187838	-0.188935	-0.0169681	-0.172227	-0.18852	0.0134541	-0.207865	-0.0220305	0.016322	-0.131947	-0.0586668	0.18599	0.0308662	-0.0663156	-0.0993081	-0.308415	-0.197496	-0.175242	-0.0747076	-0.0433422
REACTOME_DEUBIQUITINATION	0.0481616	-0.108244	-0.113609	-0.133852	0.13173	-0.196571	-0.0105503	-0.134036	-0.129128	-0.0252539	0.238414	-0.243281	-0.0760872	-0.221422	-0.0172661	0.00649546	-0.0217818	-0.102152	-0.0287355	-0.220006	-0.116581	0.223219	-0.114371	-0.0756827	0.0688815	-0.0567029	-0.125993	0.102528	-0.114418	-0.0889666	-0.0690016	0.0441201	0.0461158	-0.0294471	-0.126256	0.0133489	-0.0175647	0.0605022	-0.156964	0.105835	0.129564	-0.0944078	-0.188251	0.0559756	-0.00611686	-0.303402	-0.0104055	-0.223693	-0.0318883
REACTOME_UCH_PROTEINASES	-0.12521	-0.0414474	-0.345026	-0.04137	0.072147	-0.0377953	0.0720975	-0.252886	0.0104713	-0.179143	0.0137266	-0.184604	-0.0210961	-0.255269	0.091068	-0.13197	0.0560549	-0.231186	0.104804	-0.200834	-0.244179	0.283309	-0.00303557	0.209724	0.124667	-0.0481739	-0.20124	0.365463	-0.0175113	-0.318884	0.00373451	0.137824	-0.144829	0.0828815	-0.0604157	-0.296161	0.0920253	0.268414	-0.105135	0.133561	0.40295	0.231844	0.04905	0.15017	0.0724868	-0.325407	-0.115928	-0.0239416	-0.236061
REACTOME_UB_SPECIFIC_PROCESSING_PROTEASES	-0.0469477	-0.123435	-0.177886	-0.119489	0.178817	-0.1956	-0.0356515	-0.176551	-0.174202	-0.106578	0.242369	-0.300603	-0.0914931	-0.293526	-0.0175916	-0.0291785	-0.0556472	-0.135064	-0.0124763	-0.252445	-0.145693	0.219963	-0.164453	-0.0993304	0.0817266	-0.0677343	-0.149188	0.106871	-0.196623	-0.0894823	-0.089838	0.0176377	0.0414088	-0.116904	-0.211263	0.0105156	-0.049086	0.0645911	-0.205959	0.106652	0.0916729	-0.0922319	-0.213066	0.115299	-0.0285199	-0.378205	-0.0598649	-0.243587	-0.0763791
REACTOME_OVARIAN_TUMOR_DOMAIN_PROTEASES	-0.263575	0.0974558	-0.205846	0.169365	0.130097	0.399564	0.284303	0.325881	0.128415	-0.246271	-0.187265	-0.347403	0.315206	-0.385766	-0.34917	-0.457376	-0.0784732	-0.397046	-0.0780754	-0.144846	-0.406351	0.199985	0.349793	0.240502	-0.0882358	-0.513287	0.0173238	0.372849	-0.133074	0.154123	-0.369523	-0.260358	-0.444676	-0.13233	-0.409977	-0.235035	-0.000715283	0.148771	0.183881	0.370632	0.312498	-0.254986	0.125411	-0.214879	-0.621208	-0.470562	-0.272765	-0.432661	-0.518627
REACTOME_METALLOPROTEASE_DUBS	-0.077276	0.190415	-0.559291	0.494628	0.445421	0.316173	0.251158	-0.383054	0.280523	-0.553038	0.0425	-0.696026	0.478375	-0.491881	-0.469098	-0.292991	-0.309469	-0.525127	0.462813	-0.53405	-0.585714	0.432401	0.233039	0.567944	0.216768	-0.259414	-0.569856	0.562437	-0.427981	-0.293196	-0.210793	-0.145884	0.0461347	0.439709	-0.486546	-0.422835	0.249132	0.723209	0.00709309	0.506816	0.687717	0.427583	0.413333	0.67113	0.0877603	-0.69716	-0.531918	-0.0185788	-0.638264
[truncated: 278 more rows]
[truncated: 1,069 more columns]
