# Supplementary material for: Plasma proteomic profiling of pan-cancer patients discovers biomarkers of cancers
Source: Research Square preprint supplement (doi:10.21203/rs.3.rs-939549/v1), 2021-10-05
Supplement: Supplementary file 6 [file 7bfb1a099b9de82c8d9fd772.xlsx]

## Sheet: Description
Surgery Information
Columns	Description
Experiment Number	Sample Number
Status	Operation status
7A
Columns	Description
Symbol	HUGO gene symbol
Cluster1 & 2
Columns	Description
Pathway name	Pathway name
#Entities found	The number of curated molecules common between the data set and the pathway named in reactome
#Entities total	The total number of curated molecules of the type selected with Results Type within the pathway named in reactome
Entities ratio	The proportion of Reactome pathway molecules represented by this pathway.
Entities pValue	The result of the statistical test for over-representation, for molecules of the results type selected.
Entities FDR	False discovery rate. Corrected over-representation probability.
Submitted entities found	The molecules common between the data set and the pathway named in reactome
7E
Columns	Description
Symbol	HUGO gene symbol
FC	Ratio of DEPs in plasma before and after surgery
P value	T test pvalue of DEPs in plasma before and after surgery
7H
Columns	Description
Symbol	HUGO gene symbol
Count	number of proteins correlated to the node
7K
Columns	Description
Symbol	HUGO gene symbol
Exp	Experiment Number
Expression	Expression of proteins in the experiment
CDK5	Expression of CDK5 in the experiment

## Sheet: Surgery Information
Experiment Number	Status
Exp082904	First Visit
Exp082882	First Visit
Exp082891	First Visit
Exp082916	First Visit
Exp076193	First Visit
Exp082900	First Visit
Exp076158	First Visit
Exp082913	First Visit
Exp076167	First Visit
Exp076198	First Visit
Exp076174	First Visit
Exp082888	First Visit
Exp082919	First Visit
Exp076179	First Visit
Exp076181	First Visit
Exp082910	First Visit
Exp076153	First Visit
Exp076152	Pre-Operation
Exp076177	Pre-Operation
Exp076170	Pre-Operation
Exp082905	Pre-Operation
Exp082883	Pre-Operation
Exp082892	Pre-Operation
Exp076186	Pre-Operation
Exp076189	Pre-Operation
Exp076165	Pre-Operation
Exp076176	Pre-Operation
Exp076192	Pre-Operation
Exp076194	Pre-Operation
Exp082914	Pre-Operation
Exp082901	Pre-Operation
Exp076159	Pre-Operation
Exp076201	Pre-Operation
Exp076169	Pre-Operation
Exp076161	Pre-Operation
Exp076196	Pre-Operation
Exp076184	Pre-Operation
Exp076188	Pre-Operation
Exp076162	Pre-Operation
Exp076163	Pre-Operation
Exp076173	Pre-Operation
Exp076199	Pre-Operation
Exp076175	Pre-Operation
Exp076190	Pre-Operation
Exp082889	Pre-Operation
Exp076168	Pre-Operation
Exp076180	Pre-Operation
Exp082920	Pre-Operation
Exp082911	Pre-Operation
Exp076182	Pre-Operation
Exp076156	Pre-Operation
Exp076154	Pre-Operation
Exp072639	Pre-Operation
Exp072641	Pre-Operation
Exp072644	Pre-Operation
Exp072646	Pre-Operation
Exp072649	Pre-Operation
Exp072651	Pre-Operation
Exp074379	Pre-Operation
Exp074391	Pre-Operation
Exp074393	Pre-Operation
Exp072623	Pre-Operation
Exp072625	Pre-Operation
Exp072627	Pre-Operation
Exp072629	Pre-Operation
Exp072637	Pre-Operation
Exp076178	Post-Operation
Exp076187	Post-Operation
Exp076171	Post-Operation
Exp076197	Post-Operation
Exp076191	Post-Operation
Exp076195	Post-Operation
Exp076185	Post-Operation
Exp082918	Post-Operation
Exp076202	Post-Operation
Exp076200	Post-Operation
Exp076164	Post-Operation
Exp082884	Post-Operation
Exp076157	Post-Operation
Exp076183	Post-Operation
Exp082921	Post-Operation
Exp076166	Post-Operation
Exp082890	Post-Operation
Exp082912	Post-Operation
Exp082915	Post-Operation
Exp082906	Post-Operation
Exp076155	Post-Operation
Exp072620	Post-Operation
Exp072642	Post-Operation
Exp072645	Post-Operation
Exp072647	Post-Operation
Exp074392	Post-Operation
Exp074394	Post-Operation
Exp074398	Post-Operation
Exp072622	Post-Operation
Exp072624	Post-Operation
Exp072626	Post-Operation
Exp072628	Post-Operation
Exp072630	Post-Operation
Exp072632	Post-Operation
Exp072635	Post-Operation

## Sheet: 6A
Symbol	Exp082904	Exp082882	Exp082891	Exp082916	Exp076193	Exp082900	Exp076158	Exp082913	Exp076167	Exp076198	Exp076174	Exp082888	Exp082919	Exp076179	Exp076181	Exp082910	Exp076153	Exp076152	Exp076177	Exp076170	Exp082905	Exp082883	Exp082892	Exp076186	Exp076189	Exp076165	Exp076176	Exp076192	Exp076194	Exp082914	Exp082901	Exp076159	Exp076201	Exp076169	Exp076161	Exp076196	Exp076184	Exp076188	Exp076162	Exp076163	Exp076173	Exp076199	Exp076175	Exp076190	Exp082889	Exp076168	Exp076180	Exp082920	Exp082911
ACACA	1.00652	1.03862	0.964666	1.60323	0.938465	1.37608	0.732144	0.866849	1.21242	0.79587	0.995829	0.871015	1.13172	1.33184	1.03215	1.12955	0.703172	0.94861	1.06377	1.0722	1.03911	1.01753	0.886118	0.826454	0.717416	0.739885	0.921873	0.760804	1.49369	0.842768	1.58379	1.44312	1.13285	0.827086	0.6862	0.683576	0.776486	0.580969	0.904008	0.667232	1.12451	0.809948	0.790928	0.749259	0.807984	1.15971	1.27257	0.658994	1.06398
ACADVL	1.25431	0.0405843	0.216304	0.0314871	0.381543	0.693156	1e-05	0.185558	1e-05	1e-05	1e-05	0.230093	0.302483	0.0808037	0.0416883	0.0828417	1.21434	1.1644	1e-05	0.899132	2.02102	0.0765212	0.808171	1e-05	1e-05	1e-05	1e-05	0.557138	15.5952	8.3587	0.00371859	0.107391	0.0150687	1.15209	1e-05	0.0492016	1e-05	1e-05	1e-05	1.12186	1.4375	1e-05	0.0917684	1e-05	0.105612	1e-05	0.121912	1e-05	0.0653406
ACSL1	1.60428	3.9014	1.57502	1.4034	0.59826	1.92076	5.92514	2.91793	1.51655	0.498727	1.28223	2.31493	2.02871	0.217744	1e-05	2.25443	1e-05	1.7821	1e-05	1.30938	0.742679	2.02272	0.36897	0.899563	1e-05	1e-05	0.0680289	0.634683	3.89312	3.01538	1.69996	4.80024	1e-05	1.95311	1e-05	0.857889	1.50644	1e-05	2.54717	2.40837	1.9839	1.46484	1.08448	0.639975	1.65434	2.25734	1.20945	4.3407	3.08333
ADH1A	0.0865625	0.252362	0.283232	1e-05	1e-05	0.0379178	0.655573	1e-05	1e-05	1e-05	6.90642	6.41423	0.248129	0.0542219	0.51281	0.209199	26.1543	2.32852	1e-05	3.67772	0.418313	0.252969	0.255769	0.0852013	0.247402	0.0677493	0.0355964	1.17758	0.124655	0.0337402	0.212248	0.134737	0.32198	8.0557	0.136767	0.138195	0.197214	0.329957	0.136465	0.310847	1e-05	0.12941	1e-05	1e-05	0.214732	0.244663	0.0484404	1e-05	0.0258101
AFM	687.761	901.141	747.811	831.947	657.946	498.037	388.158	528.291	644.815	313.29	389.541	734.89	630.283	432.04	514.132	577.401	620.373	558.903	439.709	443.977	713.822	941.829	808.028	564.579	642.067	570.319	631.729	435.006	418.016	449.508	504.883	341.411	538.278	390.005	740.286	688.958	438.695	594.797	483.071	550.179	547.595	328.884	357.779	488.583	639.867	653.712	437.235	700.994	423.197
AHSG	690.975	922.895	1293.66	686.509	965.948	663.277	462.242	768.15	1028.72	599.872	825.225	547.437	573.372	1615.53	1611.82	806.319	1531.62	1270.51	709.782	1426.17	1081.07	940.065	1396.98	812.558	917.342	801.01	911.551	1115.69	583.232	576.76	596.639	434.067	721.749	952.825	949.062	1562	1070.53	1414.16	705.97	893.952	1462.28	700.675	1846.22	1917.32	433.557	1056.15	2044.48	284.287	570.521
ANXA2	4.43267	4.13571	9.28498	2.00758	0.796583	0.36089	3.76686	1e-05	3.60478	0.845208	0.542186	33.7267	1e-05	3.58964	8.71417	3.619	27.4417	4.48109	5.4819	10.579	0.563923	26.3994	0.819122	0.00366129	0.85629	3.71323	1.61149	2.04533	0.41589	1e-05	11.0079	1.25684	3.81607	8.84045	0.874084	3.57918	3.92021	0.83469	0.598778	5.26457	5.19067	2.60158	7.606	9.03796	20.5354	7.88037	7.22581	0.374788	0.782446
ANXA2P2	4.6254	4.31552	8.9842	2.03533	0.831217	0.0354512	2.151	1e-05	3.74205	0.881956	0.511785	34.9915	1e-05	3.74571	6.7368	3.50546	26.3062	4.50579	4.78057	8.05657	0.588442	15.386	0.854736	0.00382047	0.89352	3.58286	1.53321	2.13426	0.433972	1e-05	10.2655	1.31148	3.98199	7.42662	0.912088	3.55206	3.9347	0.870981	0.0121801	5.49346	5.37316	2.71469	7.72338	9.30035	21.2473	8.22299	7.53998	0.309674	0.766692
APOA1	14606.2	14154.3	12387.7	16746.1	11622.3	11951.7	8301.15	8330.66	10339.6	12508	8625.54	10300.3	15698.9	11215.6	13113.8	10146.6	12408.6	12215.2	8585.89	9003.8	15336	10536	11529.5	13418.9	12191.2	11697.8	10480.4	12642.5	9928.3	8516.04	11043.7	6968.73	10301	11267.3	8949.91	9268.9	9780.24	10846.2	9473.58	9518.44	9441.53	11243.8	9747	11104.6	10442.4	11473.5	9617.13	13840.8	9497.41
APOA4	2214.29	1459.51	1324.36	1522.14	413.641	1494.09	1315.18	1467.67	1440.93	489.639	628.953	3567.43	676.675	1410.63	1680.64	2110.14	1295.59	1961.2	1223.92	1123.26	1811.15	1016.71	1436.03	2445.05	463.734	1750.78	2263.54	2349.48	791.837	469.194	1831.49	851.428	1240.25	2908.65	2042.13	1742.04	1588.52	1864.2	1486.42	1806.3	1173.48	433.678	743.33	702.538	1789.99	1468.27	1073.81	721.919	1312.17
APOE	386.862	359.882	776.197	284.256	547.016	605.154	160.654	762.124	448.083	663.32	254.649	468.358	336.454	382.134	301.123	356.696	1061.73	253.136	731.035	1300.51	286.949	365.338	635.655	424.29	814.159	346.345	555.432	481.572	640.949	635.835	567.701	343.592	633.509	234.009	452.148	724.055	406.843	488.529	457.818	325.285	472.393	661.941	290.81	750.172	538.658	428.616	476.562	209.193	333.846
ARHGAP25	22.234	7.36754	16.8047	7.00415	1e-05	2.1876	2.49541	10.4311	1e-05	1e-05	1e-05	3.05723	4.15044	2.45019	2.21313	16.2848	0.0135043	2.92953	1e-05	2.31894	5.89686	19.5312	16.8283	1e-05	0.187255	2.781	0.229127	1e-05	2.32855	5.95863	0.123278	1e-05	1e-05	3.24255	4.6015	4.23331	2.58796	1e-05	3.88138	1.51129	2.27831	0.337288	1.09993	1.18055	11.704	1.81272	2.21109	4.28785	2.73828
ARHGAP42	5.42401	2.74893	1e-05	1e-05	1e-05	1e-05	1e-05	3.31674	1e-05	1e-05	1e-05	3.49725	1e-05	1e-05	1e-05	1e-05	1e-05	1e-05	1e-05	1e-05	1e-05	1e-05	1e-05	1e-05	1e-05	1e-05	1e-05	1e-05	1e-05	2.17608	1e-05	1e-05	1e-05	1e-05	1e-05	1e-05	1e-05	1e-05	1e-05	1e-05	1e-05	1e-05	1e-05	1e-05	1e-05	0.0564473	1e-05	1e-05	4.63415
ASPH	0.734731	1e-05	1e-05	1e-05	1.81117	1e-05	1e-05	1e-05	0.883543	1e-05	0.751561	1.01185	1e-05	1e-05	0.443329	0.742137	1e-05	1e-05	2.30948	1e-05	0.163167	0.363549	1e-05	1e-05	0.310465	0.496355	1.09444	0.750589	1.13331	1e-05	0.762213	0.861692	0.506246	1e-05	0.994178	0.51553	1e-05	0.799201	0.377187	0.9225	1e-05	1e-05	1e-05	2.78495	4.24231	0.680588	0.214034	0.104549	1e-05
BHMT2	0.555812	0.654613	0.00881365	0.767928	2.75956	1e-05	0.259915	0.864331	1e-05	0.325565	0.28659	1e-05	0.869471	0.507511	0.947918	0.510672	4.17422	0.333396	0.499894	0.347042	1.84198	0.336942	0.276466	0.534528	0.773362	1.13209	0.484666	0.407437	1e-05	0.620424	1e-05	1e-05	0.540658	0.184959	0.267651	0.185698	0.523577	0.273746	0.991566	0.401867	0.449076	0.662547	1e-05	1.22519	0.241956	0.597539	0.885771	1e-05	0.399489
C9	50.9155	42.4067	38.4317	25.6132	303.602	156.666	82.872	75.0481	70.0709	542.695	257.689	48.8359	64.4728	371.557	32.316	116.027	175.855	59.5276	175.196	88.7203	12.8006	37.775	87.5595	46.5637	72.4215	54.9701	136.507	128.409	416.956	137.307	359.718	362.005	263.32	47.5865	93.2175	181.183	193.489	110.822	141.138	107.985	242.043	433.531	229.532	224.214	68.1257	77.5581	345.128	40.3014	154.119
CACNA2D1	2.30178	4.21148	0.267802	0.951211	0.015219	2.81132	0.505795	0.631264	0.00726319	0.3592	0.673464	4.76255	2.49271	0.832537	0.123849	1.9461	0.0944046	3.96732	0.750122	0.469931	0.590736	4.02947	4.20418	1.71106	0.048632	2.05074	0.405784	0.479148	0.0103132	0.0842264	0.0924982	0.910503	0.254293	0.919504	1.26732	0.376784	0.24031	0.0517659	0.513366	0.10001	1.73424	0.323845	0.0052204	0.148256	3.58432	0.350045	0.389154	2.70083	0.0489786
CCAR1	0.0264294	0.0228143	1e-05	1e-05	0.0174938	0.0809093	0.198049	1e-05	1e-05	0.544515	1.44953	1e-05	1e-05	1e-05	1e-05	1e-05	1e-05	1e-05	1e-05	0.822437	1e-05	1e-05	0.059158	1.85831	1e-05	1.17339	0.146425	1e-05	0.105567	1e-05	1e-05	0.209347	1e-05	1e-05	1e-05	1e-05	0.707279	0.592165	1e-05	5.79602	1e-05	1e-05	0.0347717	1.54436	1e-05	1.10734	1e-05	1.56407	1e-05
CCDC126	1.64153	1.85335	2.35192	1.96812	0.30168	2.20731	0.559529	1.86885	0.531451	0.61265	0.957363	1.85251	1.94749	0.543637	0.368968	2.49118	0.326512	1.05482	0.445314	0.706043	1.99349	1.73758	2.38245	0.757255	0.62113	1.1212	0.730355	0.533328	0.295766	1.95419	2.6454	0.991371	0.501074	1.25125	0.76516	0.504334	0.532723	0.42369	0.710567	0.467525	0.698126	0.833433	0.960184	0.430887	2.01943	0.616344	0.144571	1.69276	2.03918
CD14	10.6279	11.479	46.3545	12.6045	52.5518	31.4944	9.53068	22.8583	11.7453	62.8761	34.8633	11.8967	20.7926	41.1742	5.70381	35.5333	46.3489	6.54213	32.5043	79.5192	13.3791	13.613	30.8898	17.2304	18.4863	13.326	38.0537	20.5805	78.8833	32.6932	44.044	40.5027	28.4695	8.87772	14.6205	32.1621	24.5875	13.9411	23.4913	7.8993	31.9092	52.5001	29.0584	38.4624	12.6094	11.064	34.4111	2.2908	34.8049
CDH13	2.31439	1.97732	2.26155	2.47228	1.52633	1.86877	0.452562	1.7923	1.53257	5.75045	10.7151	1.36436	1.67081	1.67564	2.0388	1.44287	1.3033	1.75043	1.7969	1.23252	3.05296	1.78546	2.06454	3.24337	0.648832	1.77938	2.62506	2.00666	2.76271	1.38494	2.46575	2.66379	2.19928	0.954108	1.76266	0.688021	1.70125	1.93687	1.671	0.813805	1.77275	2.55745	0.681933	2.14446	1.30768	1.29037	2.12192	0.485336	1.46435
CFP	25.8994	20.1974	27.4915	47.0913	9.752	15.9867	17.3947	7.11489	12.0358	7.80349	4.81306	16.1722	23.3542	5.2309	17.1851	14.9117	17.8754	14.6906	12.7924	13.0502	25.0929	18.3675	25.4958	15.128	9.81124	12.8115	12.516	14.8025	6.47604	11.005	16.2316	7.73032	11.5721	8.24214	12.77	15.7479	5.97895	8.40965	11.1901	7.57265	8.3777	8.52693	5.88594	14.3394	19.3651	14.313	7.18995	47.7345	5.98632
CHIT1	2.39993	1e-05	1e-05	1e-05	0.695783	1e-05	0.760756	0.0472167	1.61411	1e-05	0.0841489	1e-05	0.0130648	0.332705	0.24737	0.216113	0.710889	0.230978	0.82595	2.24011	2.09162	0.0245507	1e-05	0.990246	0.142873	0.129707	1.38373	1.02943	1.38118	0.0689091	1e-05	0.773234	0.256255	0.0272548	0.291103	1.90833	3.25459	3.77212	3.13738	1.55006	0.19754	1.30121	0.912633	0.239767	0.294009	0.9469	0.199979	0.024516	0.0314021
CLEC3B	177.893	127.484	119.606	180.337	82.7447	122.588	81.2122	108.639	99.6361	107.845	63.9935	124.615	131.323	98.5842	103.512	95.8528	34.6452	108.529	100.865	104.477	166.233	119.899	131.608	174.976	91.5925	92.0643	129.871	117.025	65.8305	89.1183	145.5	72.8376	100.144	75.2794	120.373	98.4846	64.71	104.633	88.085	90.4558	122.344	113.644	54.9005	99.9607	101.386	101.242	74.358	158.973	65.9308
CLIC1	0.236351	0.457741	0.136268	0.0841945	3.05743	0.425172	0.0788822	0.534989	2.09642	0.935549	1.70597	3.01868	0.315482	0.347944	0.199478	0.826392	0.161201	0.650365	0.763745	1.32286	0.382903	1.11909	0.249941	1e-05	0.515139	1e-05	0.962072	0.911365	1.34318	3.24021	0.356462	1.93752	1.89699	1e-05	2.9879	1.58872	0.167614	0.823514	2.17923	0.286941	1.91636	3.02818	0.203833	0.246522	7.44073	1.2297	4.47112	0.117139	2.67731
COG1	0.206237	0.675644	0.231823	0.035941	1e-05	1e-05	1e-05	0.664163	1e-05	1e-05	1e-05	0.388993	0.40924	1e-05	0.129053	0.407381	0.0113422	0.283369	0.138679	1e-05	0.354677	0.635649	1e-05	1e-05	1e-05	1e-05	1e-05	1e-05	1e-05	0.658122	0.371444	1e-05	1e-05	1e-05	1e-05	1e-05	1e-05	1e-05	1e-05	1e-05	0.0156194	1e-05	1e-05	0.0254584	0.0522258	1e-05	0.473055	1e-05	0.328273
COX6B1	0.14386	0.207514	1e-05	1e-05	1e-05	1e-05	1e-05	1e-05	0.0655231	1e-05	1e-05	0.845783	1e-05	1e-05	1e-05	0.51056	1e-05	1e-05	1e-05	1e-05	1e-05	0.0344769	1.59975	1e-05	1e-05	1e-05	0.30316	1e-05	0.228926	0.402634	0.70254	2.22823	1e-05	1e-05	1e-05	1e-05	1e-05	1e-05	1e-05	1e-05	1e-05	0.304824	1e-05	1e-05	1e-05	1e-05	1e-05	1e-05	1e-05
CRP	31.8021	14.3152	36.8244	177.509	651.093	121.43	1999.28	24.8491	43.5773	50.3874	542.702	14.0938	112.418	2.56234	89.9965	697.22	248.723	46.9812	55.9006	362.136	52.0033	9.52246	59.8155	1e-05	50.425	64.7669	169.448	53.8658	3815.58	281.037	55.909	1802.35	180.331	78.5882	53.9147	62.7935	92.0404	14.2539	18.8495	106.112	42.7687	130.884	755.228	1517.31	15.1369	52.0304	5.10992	1337.47	1092.67
CTBS	0.869669	2.12365	1.55198	2.86039	0.515648	1.47927	0.304871	8.99741	2.65516	0.523047	0.406502	2.56811	1.71186	2.95168	2.20363	5.81401	2.36051	2.17378	1.94217	0.35126	0.299019	2.17313	1.66412	1.27456	1.55003	1.85582	2.66363	2.65092	0.421044	2.82688	1.6872	0.493256	1.16401	1.48964	1.85306	0.706077	2.14445	1.2145	1.06278	2.9168	2.0078	0.743906	0.656169	1.57842	2.88935	2.74598	2.98416	2.83393	1.83724
CTPS2	0.0334479	6.12703	2.80262	5.16927	0.806274	5.6355	1e-05	14.9022	4.15034	0.842288	1e-05	1.69775	7.03857	7.36088	8.12092	1e-05	6.85762	3.03853	7.1272	5.94755	1e-05	0.120704	3.16907	3.65024	3.50472	2.62371	1e-05	4.4912	1e-05	6.7112	7.45894	1e-05	1e-05	1e-05	2.18895	1e-05	7.28197	3.55313	3.6715	21.7725	0.798933	6.65834	6.94745	1e-05	5.74986	14.5731	8.44309	1.35928	1e-05
CTSH	9.05021	0.358205	4.55082	6.60955	0.298685	3.39757	0.0991869	2.6831	0.390332	1.43271	0.886605	9.90173	0.341643	2.36879	1e-05	9.92562	1.84843	0.0442846	1.42009	1.02677	6.41276	3.08339	4.62969	6.5357	1.31336	17.2752	5.21644	1.58373	0.804881	1e-05	0.262025	0.0485613	0.970551	0.648182	6.46824	0.918406	0.38664	1.43839	2.81219	0.0736424	0.641946	1.48609	1e-05	0.321519	3.08117	1e-05	0.364704	1e-05	0.117083
CTSS	1.88585	1e-05	0.247493	1.11387	0.0925681	1.81113	1e-05	0.130494	1e-05	1e-05	1e-05	1e-05	1e-05	1e-05	0.904143	2.18284	2.27278	0.151119	1e-05	1.41375	2.19598	0.0713881	0.142262	1e-05	0.121798	0.482068	0.750128	3.03406	1e-05	2.1286	1e-05	1e-05	0.116433	1e-05	0.326503	1e-05	0.126444	0.360942	0.358301	0.122484	1e-05	1e-05	0.101568	1e-05	0.0559738	0.210389	0.281264	2.76453	2.30463
DDB1	0.102417	0.0928292	0.0331971	0.400498	0.148875	0.045543	1e-05	1e-05	1e-05	0.203192	1e-05	0.122541	1.40213	0.0703912	1.15057	0.0666066	0.0648201	1e-05	1e-05	0.0282035	0.334746	0.271161	0.141221	1e-05	0.942674	1e-05	0.114647	0.895574	1e-05	0.0301498	0.0953815	0.804516	0.189655	1e-05	0.0179434	0.0169604	0.0347551	1e-05	0.0878646	0.0564869	0.0316747	0.256205	0.200441	1e-05	0.0375981	0.0535176	1e-05	1.91443	0.166716
DDX39B	0.102387	1e-05	0.0473011	0.0187659	0.0514362	1e-05	39.7942	1e-05	0.277336	0.522428	0.333378	1e-05	0.368994	20.6402	1e-05	0.309935	20.0259	38.5303	0.0248025	0.0530022	0.036345	0.11598	0.120463	0.0477307	0.040953	1.0282	0.0282696	0.0648832	18.2333	0.0254797	1e-05	0.0463298	0.0572437	12.1641	0.283257	0.340261	0.0279226	0.031475	0.0357306	1e-05	0.0699697	2.16431	1e-05	27.7097	0.0268967	1e-05	0.0768379	0.150975	0.111837
DLG1	3.72464	1.28674	1e-05	1.90137	1e-05	3.45796	2.22244	3.18145	1e-05	1e-05	0.0119625	1e-05	2.73344	0.0319506	5.19807	1.69989	1.79644	22.6757	1e-05	1.91939	2.34417	2.07581	2.03821	1e-05	0.00467052	3.12612	1e-05	1e-05	0.0705784	0.827653	0.221177	0.924217	0.630206	2.93955	0.0188822	1.39336	1e-05	1e-05	0.114356	0.322161	1e-05	1e-05	0.00347408	1.69514	1.35827	2.09142	1e-05	3.53925	2.39965
DSG1	0.897481	1.27616	0.380193	1.88338	8.57756	1.99724	0.700341	1.07346	2.58495	0.78989	7.75177	1.14873	3.08133	2.14804	1.09205	0.365602	1.39121	1.19087	8.43706	1.51848	2.08998	1.92581	0.254042	0.92899	3.57942	15.5883	1.54589	0.723883	2.59596	0.983616	2.55431	17.9644	0.926441	2.61556	1.81756	2.99415	2.37229	2.1614	0.640786	3.29648	13.3745	4.03935	4.19822	1.83297	1.04822	1.0305	0.115709	1.02377	0.690896
DYNC1H1	1.22744	0.961158	1.16319	3.71345	1.66136	1.09152	0.63842	1.26909	0.921411	0.469976	0.636425	0.455308	0.205446	0.562796	0.145941	1.5315	0.343742	0.743419	0.532933	1.04292	0.365005	0.953805	0.42502	0.0685352	0.742354	0.199634	1.00908	0.435801	1.1919	1.22397	1.44714	0.366552	1.68026	0.97737	1.06767	1.81101	0.494358	1.26722	0.0931833	0.0522299	0.184647	0.757935	2.23851	0.0677275	1.51456	0.208854	1.46247	0.0443106	1.18103
EPHA4	0.33632	1e-05	1e-05	0.0401085	1e-05	1e-05	1e-05	1e-05	1e-05	1e-05	1e-05	0.157967	1e-05	0.140472	1e-05	1e-05	0.0160866	1e-05	0.0130462	1e-05	0.149584	0.103706	0.144896	0.0909008	1e-05	1e-05	1e-05	1e-05	1e-05	1e-05	1e-05	1e-05	1e-05	1e-05	1e-05	1e-05	1e-05	0.133601	1e-05	1e-05	1e-05	1e-05	1e-05	1e-05	0.100745	1e-05	0.167125	1e-05	1e-05
F13A1	84.1262	49.5712	58.4364	46.1626	26.9057	48.458	46.2824	67.0194	23.8866	54.054	21.8431	69.2759	50.1742	18.4981	63.0881	71.8577	42.5368	4.58615	34.4222	32.8404	88.7248	44.5171	8.93128	72.0907	26.6099	39.5699	49.1185	59.5534	19.2031	52.6009	5.45026	5.83742	43.442	55.5087	32.4045	25.599	34.1207	63.0326	50.4649	25.6794	46.8616	67.0366	6.58654	27.7495	30.0304	26.8531	17.4762	41.9175	51.2106
FERMT3	2.58616	3.67181	18.5872	1.79386	4.63697	6.01172	0.0335314	0.865556	0.0879951	1e-05	0.473642	4.07134	4.86692	0.448001	1.92831	1.68035	0.0270796	2.13286	0.297971	3.14916	3.17512	4.24975	4.85043	0.830103	0.31785	1e-05	0.743574	2.79698	0.228986	2.86921	7.80082	1.60087	3.04787	0.398367	0.0171445	3.36106	2.98144	0.160754	1e-05	1.96668	0.495228	3.53884	1.46869	2.18002	2.95812	0.476992	4.28877	0.556617	2.85268
FETUB	13.5831	17.4739	30.7418	17.9702	16.3941	11.4652	4.46642	16.8665	12.3987	12.3637	26.344	13.2006	12.7942	40.0271	16.8344	18.6802	25.1788	15.3331	23.4287	8.53805	20.2326	16.531	29.9876	19.9711	22.3964	17.2898	24.2181	16.3742	10.4629	18.0142	17.0207	12.5523	17.4016	7.54889	19.6123	37.9007	23.5875	14.2928	19.6194	14.0282	33.1316	11.1179	26.0243	26.811	10.8032	15.2793	31.2626	5.35351	14.4322
FGL1	0.828024	0.213726	0.188553	0.550545	3.62796	0.815393	3.46508	1.55798	0.880449	3.79774	6.96823	0.225818	1.53526	6.05492	0.716489	6.48266	0.971849	0.464807	2.97719	2.60599	1e-05	0.622427	1e-05	1.04286	0.385793	1.34001	1.36024	0.461399	12.908	11.0665	1e-05	1.2901	3.66743	1.79461	0.647176	1.74873	3.34679	0.4489	1.05952	2.22214	1e-05	7.04517	0.337048	9.23905	1e-05	0.136098	8.18319	4.52136	9.49057
FLNB	2.65651	2.51353	1.18726	4.10621	2.31257	0.206226	4.21662	5.67469	0.934853	2.14985	0.98323	1.2812	0.0522094	0.133204	1.73999	17.9731	0.48233	2.08136	0.208052	6.14231	0.339604	29.6619	2.41486	0.444355	0.489264	1.79641	1.08352	0.553885	1.9777	0.399176	2.31813	0.974707	0.939382	2.14486	0.416478	0.559701	0.718609	0.0475889	0.0891932	2.33265	1.29222	0.0342768	1.91671	0.820546	19.9812	1.31085	0.375406	4.06312	0.190955
FLNC	0.117191	0.202481	0.0574204	0.326689	0.659085	0.207847	0.0255025	1.20855	0.360097	0.884876	0.558784	0.0771557	0.171731	1e-05	0.121251	0.910105	0.134732	0.512503	0.0944117	1.3625	0.191468	0.157183	0.446741	0.0895634	1e-05	0.40428	0.95398	0.171962	0.436575	0.231332	0.841233	1.3722	0.514215	0.222928	0.444277	0.293774	0.139741	0.123574	1.18368	0.0643663	0.415859	0.236481	0.163751	0.0126001	0.279873	0.0638153	0.68623	0.123327	0.563676
FUBP3	1.06543	0.633339	0.519479	0.669684	0.22326	1.15873	10.9399	0.320284	0.120127	0.145495	0.173672	2.70532	1e-05	0.503026	15.7818	1.25748	14.4003	2.64693	0.366776	21.5784	0.338984	0.896552	1.57503	0.753594	1e-05	0.689047	1.06065	0.147598	0.161149	0.420881	2.18245	0.412061	0.466095	38.3823	0.745501	0.418651	0.75854	1.7785	0.715427	0.622716	0.272433	0.134963	8.41036	6.52937	1.1537	0.432244	2.93631	0.461298	1.49656
FUCA2	1.44169	0.289014	0.38603	16.1532	0.365805	0.385409	0.781744	0.47708	0.430872	1e-05	1.14131	0.950197	0.661422	1.11183	0.479958	1.83364	2.24506	9.13557	1.6903	1.42378	0.894972	0.524858	0.274557	2.86246	1.28934	0.538024	1.65099	0.631893	0.489113	0.572216	0.401374	0.664588	1e-05	3.00977	0.321093	0.220103	0.925771	2.04877	1.73201	0.953297	0.247198	0.274477	0.0313025	0.705583	0.519051	0.598669	0.0485892	2.78716	1.56202
FXR1	0.421045	1.54464	0.960896	0.515244	1e-05	0.0105702	1e-05	0.755971	1e-05	0.0421102	1e-05	1e-05	0.997617	1e-05	1e-05	0.75185	1e-05	1e-05	1e-05	1e-05	1e-05	0.0800206	1e-05	1e-05	1e-05	1e-05	1e-05	0.040721	1e-05	1.60693	1e-05	2.53268	1e-05	1e-05	1e-05	0.0931998	1e-05	1e-05	0.881001	0.0283279	1e-05	0.190397	1e-05	1e-05	0.676424	1e-05	0.0347072	1e-05	1.67188
GAA	0.113113	0.43111	0.0963522	1.6628	2.42416	0.179219	4.38618	0.393364	3.6854	1.84204	0.197725	0.662129	1.09791	0.598805	2.13029	1.22071	1.29152	0.950812	1e-05	3.45597	0.175854	0.318451	0.491661	1.95493	1.6716	0.407273	0.421074	0.930925	1.1346	0.492657	0.26639	1.66038	1.77747	0.0256223	3.18039	1.80504	1.39761	5.82303	0.0679905	0.0802724	1.08208	2.70175	2.21958	1.47735	0.135374	0.0183418	2.9247	1e-05	1.37423
GATM	0.907331	0.122459	0.048211	0.400304	0.991341	1e-05	0.554821	0.128141	0.298803	0.567736	0.523591	1e-05	0.138565	0.407752	1.23456	0.410927	0.526014	1e-05	0.0730129	1.79226	3.32576	1e-05	1e-05	0.00866302	0.508955	1.02065	1e-05	1.3483	0.733972	0.0302407	0.264965	0.232577	1e-05	0.742635	0.583466	0.762023	0.658081	0.122577	0.020985	0.253945	9.21404	0.589448	0.0780128	0.0168561	1e-05	0.714329	0.869649	1e-05	0.85926
GINS4	2.89621	1e-05	1e-05	1.65088	1e-05	1e-05	1e-05	3.2625	1e-05	1e-05	1e-05	1e-05	7.22919	1e-05	1e-05	5.96444	1e-05	1e-05	1e-05	1e-05	1e-05	1e-05	1e-05	1e-05	1e-05	1e-05	1e-05	1e-05	1e-05	1e-05	1e-05	1e-05	1e-05	1e-05	1e-05	1e-05	1e-05	1e-05	1e-05	1e-05	1e-05	1e-05	1e-05	1e-05	1e-05	1e-05	1e-05	1e-05	5.6692
GLOD4	0.0705003	1e-05	1e-05	0.0228265	1e-05	1e-05	0.0424294	1e-05	2.37349	1e-05	1.46468	3.16164	1.97325	1e-05	1e-05	1e-05	1e-05	0.101506	2.03419	1e-05	1e-05	1.80111	1e-05	1e-05	1.167	1e-05	4.55446	1e-05	1e-05	0.244861	0.635734	1e-05	5.49115	0.274223	4.57383	2.98515	1e-05	1e-05	5.14673	4.54597	2.28528	1e-05	0.231239	1.57917	0.0713441	5.30608	0.24344	1e-05	0.931038
GMFB	1.95585	1.13112	1e-05	2.35872	1e-05	1.19943	1e-05	2.31125	1e-05	1e-05	1e-05	5.05252	1e-05	1e-05	1e-05	3.03219	1e-05	0.108378	1e-05	1e-05	1.83466	1.20628	1.19528	1e-05	1e-05	1e-05	1e-05	1e-05	1e-05	0.407612	2.41701	1e-05	1e-05	1e-05	1e-05	1e-05	1e-05	1e-05	0.0854607	1e-05	1e-05	1e-05	1e-05	1e-05	1.34356	1e-05	1e-05	1e-05	2.03788
GOLGA4	0.0339248	0.0121904	1e-05	1e-05	1e-05	0.0212716	0.0155958	1e-05	1e-05	0.340707	1e-05	0.0385125	1e-05	0.110525	0.0349563	0.0259428	0.266009	0.00345974	0.0288673	0.126357	1e-05	1e-05	1e-05	0.016693	1e-05	0.0214299	1e-05	0.0248009	1e-05	0.025908	0.011245	1e-05	0.0251767	0.0584942	1e-05	0.0246298	0.0179107	0.0326915	0.224254	0.0269245	0.212078	0.296826	0.0220245	0.0274952	0.0845112	0.0153854	1e-05	1e-05	0.0172777
GOLM1	2.82455	0.709734	0.0796286	2.38203	1.31497	0.173636	2.82479	3.04955	3.29155	0.301956	6.42239	1.48879	1e-05	5.37278	0.742701	0.252516	2.00075	4.42542	2.98233	6.37087	0.055066	0.0924049	25.6655	0.0609379	0.178433	0.0190215	3.65328	0.0940487	2.47071	0.0254942	0.26904	3.33992	0.137589	2.42709	1.04377	0.224901	1.37668	3.46939	0.0198807	1.83618	2.70189	0.0192754	0.170884	1.80374	0.0410707	0.801739	1.92508	7.41518	0.0481717
GPLD1	22.4313	16.3444	26.6439	10.38	25.8934	39.5152	11.5758	17.7772	31.1817	30.6061	19.138	41.3603	15.834	21.9009	45.8312	19.1663	45.3663	52.4279	23.7468	11.2202	86.1601	16.8753	43.7314	19.2174	14.5586	22.1415	50.6717	33.9423	12.9417	22.9266	39.932	16.0468	40.9662	24.1762	29.6935	29.404	22.2586	36.299	39.6516	22.0452	36.9067	39.485	31.0172	24.9589	38.0791	13.9063	15.2139	2.60254	12.65
GSKIP	0.0621597	1e-05	1e-05	1e-05	0.772566	1e-05	1e-05	1e-05	1e-05	0.496104	0.312513	1e-05	1e-05	0.631829	1e-05	1.79856	1e-05	1e-05	1e-05	1e-05	1e-05	1e-05	1e-05	1e-05	1e-05	1e-05	1e-05	1e-05	0.789083	1e-05	1e-05	1e-05	1.34505	1e-05	1e-05	0.357848	1e-05	0.119746	0.244417	0.260339	1e-05	1e-05	1e-05	1e-05	1e-05	0.664469	1e-05	1e-05	1e-05
H2AC4	5.46361	0.128443	4.06733	9.05921	0.313648	0.448622	2.31329	0.0771322	1.64045	0.139936	1e-05	0.118379	0.107812	1e-05	0.146097	0.221222	0.263626	0.219638	0.897688	0.709001	4.09718	0.24603	2.86263	0.0801354	0.0870938	3.80152	0.968427	2.87127	0.533535	2.99866	0.311508	20.9317	0.141612	19.8442	1.27043	0.391983	0.0510829	3.5668	0.285678	26.3327	1.16625	0.335771	1.30799	0.0923642	0.0296943	0.242105	0.161691	5.59856	0.14196
H2AC6	5.46361	0.128443	4.06733	9.05921	0.313648	0.448622	2.31329	0.0771322	1.64045	0.139936	1e-05	0.118379	0.107812	1e-05	0.146097	0.221222	0.263626	0.219638	0.897688	0.709001	4.09718	0.24603	2.86263	0.0801354	0.0870938	3.80152	0.968427	2.87127	0.533535	2.99866	0.311508	20.9317	0.141612	19.8442	1.27043	0.391983	0.0510829	3.5668	0.285678	26.3327	1.16625	0.335771	1.30799	0.0923642	0.0296943	0.242105	0.161691	5.59856	0.14196
H2AW	5.46361	0.128443	4.06733	9.05921	0.313648	0.448622	2.31329	0.0771322	1.64045	0.139936	1e-05	0.118379	0.107812	1e-05	0.146097	0.221222	0.263626	0.219638	0.897688	0.709001	4.09718	0.24603	2.86263	0.0801354	0.0870938	3.80152	0.968427	2.87127	0.533535	2.99866	0.311508	20.9317	0.141612	19.8442	1.27043	0.391983	0.0510829	3.5668	0.285678	26.3327	1.16625	0.335771	1.30799	0.0923642	0.0296943	0.242105	0.161691	5.59856	0.14196
H4C1	10.0361	0.718395	30.6317	5.8143	57.6882	20.0901	0.261969	3.23097	80.0919	2.92129	1.28395	1.04512	0.610679	13.4568	1e-05	25.5352	15.1454	112.535	7.23509	1.53608	1.64032	0.59046	0.309379	1e-05	1e-05	65.3946	46.954	11.4652	10.1112	6.6674	2.96593	29.0733	0.0707665	2.58162	1.03093	7.60191	0.59396	0.347411	8.03099	0.426082	87.4304	1.11779	5.53216	32.0852	0.177606	47.9507	45.2397	1.84394	1.69834
H6PD	2.16051	0.109051	2.4155	5.84526	0.22428	0.252097	1.42559	1.14192	10.5864	0.396286	6.66076	0.0316664	1.36734	11.4846	0.0571343	0.0553484	0.305174	0.503954	7.67009	5.26505	0.778114	0.899895	0.425977	5.91956	7.4104	0.0962803	0.0474777	0.0912819	4.47407	0.37289	0.0909821	1.12546	3.8878	0.0860178	2.79576	0.12605	1.29532	0.115509	4.98797	4.87258	0.362559	0.89946	0.0994893	7.06166	0.396772	0.17752	10.1363	1e-05	0.379739
HABP2	15.9408	17.4191	20.1691	43.9084	17.5938	16.6365	17.4528	15.6334	21.1399	10.1881	25.6479	30.524	26.5049	17.0512	20.0321	21.0072	19.5897	26.4676	28.4117	16.3386	13.4569	18.5658	24.7148	24.2537	21.2303	26.0681	21.9234	18.5309	16.7207	17.6005	18.763	22.2044	15.2234	15.9921	21.6792	13.5448	14.1078	17.3593	17.7407	26.4781	18.704	13.0067	24.815	13.5395	21.0754	20.5518	13.5718	20.5214	21.9865
HADHA	0.932407	0.0396638	0.038356	0.0552328	1.71907	4.22424	1.29725	1.93012	6.82382	0.0284812	1e-05	2.53138	0.675661	0.017396	2.42242	0.0503545	1.38667	4.61024	0.047323	9.22542	0.0504036	0.0553414	0.0318381	0.0255374	0.0144651	1e-05	3.5232	0.109816	1e-05	1.37545	1e-05	0.00870469	0.0164723	0.0244685	0.00650138	1e-05	0.0705431	2.70845	0.060635	6.1306	0.173428	1e-05	29.0053	1e-05	2.40613	0.152068	0.128532	0.0119082	0.260373
HMGB1P1	0.669359	1.0035	0.419507	1.66206	4.50513	0.473878	1e-05	1.07438	4.77133	5.2995	4.95738	4.35926	1e-05	3.99755	1.072	1.78768	1.48253	1.03037	4.00057	1.96703	0.252153	0.61283	0.0455229	3.90373	4.0603	2.77277	3.52177	3.03776	1.86254	4.3002	1e-05	3.27949	5.70407	0.144733	3.77689	5.02248	5.04704	2.52627	7.74384	3.36741	8.53704	3.54446	1e-05	1.08841	5.73372	2.66596	1.75998	0.377595	3.6106
HNRNPR	0.281012	1e-05	1e-05	0.329547	0.30644	0.511734	0.0127831	1e-05	0.123399	1e-05	0.284972	1e-05	0.2003	0.107931	0.07898	0.185588	1e-05	0.0248772	0.019259	1e-05	0.162408	0.605383	0.0127864	0.172931	0.210279	1e-05	0.215185	0.494423	0.048812	1e-05	0.320102	1e-05	1e-05	0.00910971	0.0890664	0.367976	1e-05	0.362192	0.00392969	0.0975001	0.0143186	0.0766531	0.091023	0.0247735	0.0182189	0.0152864	0.045775	0.298806	0.326089
HSP90AA2P	0.0114217	0.0868768	1e-05	1e-05	1e-05	0.430985	1e-05	0.510205	0.00556223	1e-05	1e-05	0.111378	0.0165933	1e-05	0.227486	1e-05	1e-05	1e-05	1e-05	1e-05	0.00532321	1e-05	0.0766976	1e-05	1e-05	0.0733192	1e-05	1e-05	1e-05	1e-05	1e-05	1e-05	1e-05	1e-05	1e-05	1e-05	0.00805745	1e-05	0.0755501	1e-05	1e-05	1e-05	1e-05	1e-05	1e-05	0.146805	0.219264	1e-05	0.624106
HSPA1A	0.859834	16.0307	17.8204	7.20097	5.27374	11.2114	11.7453	2.19584	1.7912	0.0558518	0.705121	4.82529	2.99688	0.0921912	0.474572	8.42992	4.04568	18.5616	4.28244	0.221195	26.624	14.5308	16.9207	15.3902	19.6276	5.64771	0.57076	11.6166	0.645589	6.63548	20.8399	0.146651	9.46283	30.5066	5.92003	1.00302	18.9306	0.415411	3.57293	2.64555	14.0686	16.458	0.936168	15.035	7.85423	0.100396	2.35734	3.56408	10.67
HSPA1B	0.859834	16.0307	17.8204	7.20097	5.27374	11.2114	11.7453	2.19584	1.7912	0.0558518	0.705121	4.82529	2.99688	0.0921912	0.474572	8.42992	4.04568	18.5616	4.28244	0.221195	26.624	14.5308	16.9207	15.3902	19.6276	5.64771	0.57076	11.6166	0.645589	6.63548	20.8399	0.146651	9.46283	30.5066	5.92003	1.00302	18.9306	0.415411	3.57293	2.64555	14.0686	16.458	0.936168	15.035	7.85423	0.100396	2.35734	3.56408	10.67
HSPA5	22.9455	9.74902	21.6795	20.7194	8.425	4.34081	14.4146	19.5713	32.886	6.65695	17.6074	14.7295	26.4213	3.87148	24.5165	28.8708	22.3649	17.2206	17.0755	5.4394	33.7149	10.3552	13.7476	8.28135	7.72846	23.2261	26.0012	31.0464	5.32747	8.36994	6.69506	4.78801	3.58092	48.3338	13.2119	3.59941	3.19276	16.8287	3.84394	25.2976	36.033	5.55447	7.34126	5.12343	12.4075	16.2915	9.17784	13.5892	13.5972
HSPA9	0.304829	0.128989	0.551212	0.98054	1e-05	1e-05	1e-05	0.679697	0.355689	0.0703055	0.48791	1.67826	1.25509	1e-05	1e-05	2.01394	0.209543	0.0722336	1.62241	1.26556	1.47751	1e-05	0.165245	0.0193737	0.0237488	0.845679	0.0279226	1.82042	1e-05	1.1556	1e-05	0.528404	0.234096	0.247431	0.395357	1.5901	0.0327428	0.11805	1.09272	0.326934	1.49976	0.97143	1e-05	1e-05	1.23975	1e-05	0.289292	0.116377	0.290398
ICOSLG	4.08301	4.41457	8.23003	9.26249	2.37301	4.06577	2.0702	5.01156	4.32009	3.42897	2.48155	2.62652	6.78545	2.98856	3.51421	7.34653	4.12535	4.58692	4.3261	4.8962	5.53875	5.2416	8.35296	8.37414	4.79028	6.08836	5.40412	4.81141	1.92351	2.17216	4.41478	4.11284	3.50051	3.8811	2.75015	2.80852	5.22067	3.36366	5.78362	3.88067	4.13514	4.20066	2.07473	4.25592	3.0647	4.51282	3.20006	3.58166	4.09923
IGKV4-1	5.87332	2.53333	1.06782	10.8206	1e-05	1.85325	8.31079	31.06	0.771707	1.48657	3.147	3.18977	21.4676	2.17657	5.854	4.06917	1e-05	4.99405	5.5851	0.422048	6.22068	0.708693	1.36952	1.12495	3.90236	4.20518	3.07259	1e-05	1e-05	3.39008	7.18981	5.44782	1.65544	4.50146	2.34612	4.0715	0.249835	3.16546	1.05505	3.43536	6.2656	0.982224	5.49867	1e-05	3.07604	2.65511	0.925054	24.5021	2.50653
INPP5K	7.34671	21.6992	13.6751	1e-05	3.42324	7.4187	3.43402	13.3805	19.433	2.22373	14.3845	18.2721	3.81459	11.0283	8.10951	8.90644	5.67294	16.2396	6.1182	3.05902	4.12496	13.8469	16.9594	11.5295	10.7763	17.2221	15.5043	6.45388	4.80724	10.7007	10.2024	14.5855	17.2663	7.42006	18.1336	6.71285	10.2786	9.07137	24.6579	16.4195	9.62774	11.7419	15.9959	8.77887	13.2292	14.8163	8.48058	2.54145	4.9071
ITIH3	99.3391	142.335	167.658	65.2173	241.201	198.39	40.576	136.341	143.449	254.639	395.621	152.289	76.0059	398.709	100.246	92.8522	271.208	124.645	316.551	287.96	112.374	136.158	156.572	127.003	196.34	119.863	218.374	220.014	276.192	111.768	226.388	267.361	185.623	130.451	114.999	164.721	287.722	176.641	75.8226	232.226	225.072	274.796	358.583	133.297	131.205	134.588	355.299	15.6988	143.861
LAMC2	0.0298537	1e-05	1e-05	0.0310771	1e-05	1e-05	1e-05	1e-05	1e-05	1e-05	0.00526794	1e-05	1e-05	1e-05	1e-05	1e-05	1e-05	1e-05	1e-05	1e-05	0.157522	0.0306869	1e-05	1e-05	1e-05	1e-05	1e-05	1e-05	0.270586	1e-05	1e-05	0.252105	1e-05	1e-05	1e-05	1e-05	1e-05	1e-05	0.00557399	0.24114	1e-05	1e-05	1e-05	0.0242736	0.00907396	1e-05	1e-05	1e-05	0.0102395
LAMP2	1.22711	1.96593	1.79543	5.2913	1.75841	0.893191	2.56641	3.38027	3.489	1.52913	3.58081	0.690987	2.78953	1.82028	1.09756	4.21689	3.3379	3.97652	2.53005	2.94936	1.60435	1.75897	2.06111	2.64494	2.18115	5.01392	2.0289	1.48799	1.16163	2.87313	1.32496	2.15975	2.5477	5.17138	2.60615	1.86094	0.300685	2.11396	2.47433	2.10558	4.10683	2.56562	3.59624	0.810144	0.654175	4.53409	1.30366	3.15148	1.94733
LMNA	1.97113	2.04254	1.20677	0.957982	0.767729	0.481834	0.5451	1.80076	7.64461	1.26933	2.26892	1.11395	0.17263	1.20139	0.861298	0.347413	2.15773	1.34439	1.43435	4.36675	9.30885	0.687323	0.669595	1.27151	1.08338	0.398177	0.539639	1.13042	1.26672	1.22663	0.389826	1.0376	1.55273	0.86997	0.451544	2.82383	1.61296	0.861406	2.33377	0.71706	0.631297	1.28701	1.69836	1.23624	1.66602	1.1766	2.80935	1.03331	0.266285
LRG1	383.135	386.479	345.59	473.386	878.141	744.885	1678.76	330.38	388.423	552.455	706.427	291.255	560.075	694.382	926.74	1219.94	933.144	669.145	829.399	692.33	408.303	326.965	332.443	329.512	307.242	296.353	416.261	493.955	1785.5	776.736	661.578	1262.83	633.183	1107.85	256.682	358.036	937.129	451.114	251.248	776.905	361.206	558.039	725.728	1085.99	293.601	413.982	828.378	1488.95	1330.79
LTF	5.1547	1.37223	4.82589	2.03224	3.79032	3.75783	1.21863	2.60033	55.9614	12.2232	3.76341	15.8424	5.43364	2.09885	112.551	13.0742	112.503	7.42109	1.04784	1.29402	3.84074	1.65904	2.37431	2.11674	0.24648	1.24335	41.9087	52.8103	1.6431	3.89072	0.0306298	4.56495	1.5152	66.7457	2.14654	1.23715	1.81713	68.7393	4.56585	3.31793	73.8595	8.82977	4.65838	2.37893	5.56105	1.22583	1.90121	6.86943	6.84422
MACF1	0.199978	0.0302722	0.0193023	0.201497	1.63468	0.00553802	2.3263	0.130047	0.00602315	0.202892	0.135496	1e-05	0.446974	0.0418917	0.00582516	0.314296	1.38854	0.00157887	1.59897	0.0971026	0.881486	0.70327	0.0473277	0.0253945	0.0652199	0.0335647	0.0760742	1.72618	0.0826225	0.116298	0.0309354	0.04594	0.0287579	0.07788	0.0135933	0.00238054	0.0502079	0.00414336	0.252277	0.0209219	0.0109424	0.0101316	0.0026265	0.00336229	0.0295554	0.0183302	0.0536398	0.375623	0.201491
MAN2A1	0.174053	0.287506	0.106397	0.60618	0.0212939	0.0953568	1.07516	1.25523	0.612597	0.0231684	0.44322	0.098269	0.469918	0.0384829	1.25257	0.348861	1.23355	0.424823	1e-05	1.54664	0.189846	0.208906	0.0386445	0.0201058	0.0229865	0.163776	0.0927276	0.0175189	1e-05	0.488662	0.515738	0.358599	1e-05	1.78079	0.0435779	1e-05	0.114818	1e-05	0.18642	0.38304	0.182636	0.210842	0.0857198	1e-05	0.0257575	0.0609915	1e-05	0.0847032	0.181227
MAN2A2	0.401112	1e-05	1e-05	0.105237	1e-05	1e-05	1e-05	0.0309437	0.0267091	1e-05	1e-05	1e-05	0.329173	1e-05	1e-05	1e-05	1e-05	1e-05	1e-05	1e-05	1e-05	1e-05	1e-05	1e-05	1e-05	0.734262	1e-05	1e-05	0.569414	1e-05	1e-05	1.76702	1e-05	1e-05	1e-05	0.611723	0.0916126	1e-05	1e-05	1e-05	1e-05	1e-05	1e-05	1e-05	1e-05	1e-05	0.0452865	0.0186249	1e-05
MAST1	2.86932	0.692473	0.0551729	8.58155	4.27876	1e-05	1e-05	1e-05	1e-05	1e-05	4.69572	1e-05	1e-05	3.78174	1e-05	1.77356	7.65517	1e-05	4.39158	1e-05	3.19374	0.0736605	0.110558	1e-05	2.53471	0.265341	5.71523	6.97212	1e-05	0.117731	0.0719232	1e-05	1e-05	1e-05	1e-05	1e-05	5.7316	1e-05	0.329307	1e-05	5.07733	4.57027	1e-05	1e-05	0.0721326	4.73561	7.18647	10.4371	1e-05
MAST2	2.3114	0.557825	0.0444448	6.91292	3.44678	1.06971	1e-05	1e-05	1e-05	1e-05	3.78266	1e-05	1e-05	3.0464	1e-05	1.4287	6.16666	1e-05	3.53767	1e-05	2.57274	0.0593377	0.0890608	1e-05	2.04185	0.213747	4.60394	5.61643	1e-05	0.0948392	0.0579382	1e-05	1e-05	1e-05	1e-05	1e-05	4.61712	1e-05	0.265275	1e-05	4.09007	3.68161	1e-05	1e-05	0.0581069	3.8148	5.7891	8.40769	1e-05
MAST3	3.4196	0.825276	0.065754	10.2273	5.09935	1e-05	1e-05	1e-05	1e-05	1e-05	5.59627	1e-05	1e-05	4.50701	1e-05	2.1137	9.14201	1e-05	5.23381	1e-05	3.80624	0.0877872	0.131761	1e-05	3.02082	0.316229	6.8113	8.30924	1e-05	0.14031	0.0857167	1e-05	1e-05	1e-05	1e-05	1e-05	6.83081	1e-05	0.392462	1e-05	6.05106	5.44676	1e-05	1e-05	0.0859663	5.64381	8.56469	12.4388	1e-05
MAST4	1.59	0.383727	0.0305735	4.75538	2.37103	1e-05	1e-05	1e-05	1e-05	1e-05	2.60209	1e-05	1e-05	2.09562	1e-05	0.982803	4.25074	1e-05	2.43355	1e-05	1.76978	0.0408183	0.0612647	1e-05	1.40458	0.147036	3.16704	3.86353	1e-05	0.0652397	0.0398556	1e-05	1e-05	1e-05	1e-05	1e-05	3.17611	1e-05	0.182482	1e-05	2.81355	2.53257	1e-05	1e-05	0.0399716	2.62419	3.98231	5.78363	1e-05
MASTL	4.99261	1.2049	0.0960008	14.9319	7.44505	1e-05	1e-05	1e-05	1e-05	1e-05	8.17055	1e-05	1e-05	6.58023	1e-05	3.086	13.32	1e-05	7.64136	1e-05	5.58029	0.128169	0.192371	1e-05	4.4104	0.461694	9.9445	12.1315	1e-05	0.204853	0.125146	0.0336384	1e-05	1e-05	1e-05	1e-05	9.97299	1e-05	0.572994	1e-05	8.83455	7.95227	0.0937691	1e-05	0.125511	8.23997	12.5045	18.1606	1e-05
MB	0.114634	1e-05	1e-05	0.104948	0.684104	1.22154	0.400506	1e-05	0.275428	0.112576	1e-05	0.00602356	6.69209	0.0460814	2.01549	19.7696	58.3128	1e-05	1e-05	0.313791	12.4176	5.60756	1e-05	1e-05	1e-05	1e-05	1e-05	1e-05	0.119674	1e-05	2.52753	0.0352056	0.339253	0.139254	1e-05	3.91229	1e-05	0.498557	0.133165	1e-05	0.221924	0.728363	1e-05	0.411664	2.9944	1e-05	1e-05	30.145	5.30497
MON2	0.00574564	0.00933695	1e-05	1e-05	0.128091	1e-05	1e-05	1e-05	1e-05	1e-05	1e-05	0.00614435	1e-05	1e-05	0.219446	1e-05	1e-05	1e-05	1e-05	1e-05	1e-05	1e-05	1e-05	1e-05	1e-05	1e-05	1e-05	1e-05	1e-05	1e-05	1e-05	1e-05	1e-05	1e-05	1e-05	1e-05	1e-05	0.19694	1e-05	1e-05	0.0677389	1e-05	1e-05	0.182373	1e-05	1e-05	1e-05	1e-05	1e-05
MSH3	1.19593	0.0531189	1e-05	1.37189	0.0137271	1e-05	1e-05	1e-05	1e-05	1e-05	0.199745	0.0757017	1e-05	0.111597	1e-05	1.11586	1e-05	1e-05	0.48082	1e-05	0.904785	1.38452	0.0296833	0.0969275	0.942259	1e-05	0.154831	0.119886	0.0801361	1e-05	1e-05	1e-05	0.0787678	1e-05	1e-05	0.0558808	0.244854	0.031003	0.53963	0.196942	1e-05	1e-05	0.225341	0.00220049	1e-05	1e-05	1e-05	1.0855	0.527465
MUC1	0.727212	1e-05	0.592442	0.218366	0.0822355	1e-05	1e-05	2.59385	1.13548	1e-05	0.207904	0.0715703	1.24213	1e-05	2.8026	1e-05	0.0824291	1e-05	1.62957	0.07182	0.459914	5.60983	0.174087	1e-05	0.435126	1e-05	1e-05	1.0128	1e-05	1e-05	1e-05	0.91034	1e-05	4.39766	2.09204	0.0558701	1e-05	1e-05	1e-05	2.45693	1e-05	1e-05	2.07858	1e-05	1e-05	1e-05	1e-05	0.211086	1e-05
MUC2	0.0554732	1e-05	1e-05	0.227489	1e-05	1e-05	1e-05	0.0186863	1e-05	0.00399163	1e-05	0.159949	0.0211613	1e-05	1e-05	0.07813	1e-05	0.0169486	0.0242848	1e-05	0.0354839	1e-05	0.0735736	1e-05	1e-05	0.00876845	1e-05	0.415744	0.114586	0.0154085	1e-05	1e-05	1e-05	1e-05	1e-05	1e-05	1e-05	1e-05	0.0527659	1e-05	1e-05	1e-05	0.0428671	1e-05	0.0912678	1e-05	1e-05	0.0567361	0.113289
MX1	1.52819	2.56332	1e-05	1e-05	1e-05	0.888319	1e-05	1e-05	6.57491	1e-05	1e-05	1e-05	1e-05	0.973986	0.128018	1e-05	2.09721	1e-05	0.053536	0.657569	0.0778406	4.04993	1e-05	1e-05	0.0780153	1e-05	0.390793	1.07217	1.62944	4.9258	1e-05	1e-05	1e-05	1.11238	1e-05	1e-05	0.0360497	1e-05	5.4122	1e-05	1.06764	1e-05	5.60481	0.114615	5.92214	0.0305386	1e-05	1e-05	3.44407
MYH9	1.80316	2.93415	2.64026	1.32801	0.944638	3.45981	1.40816	1.56216	1.87999	2.39733	2.61513	2.98921	1.88338	2.10408	3.03913	1.9637	2.50463	3.54833	3.55758	2.52277	1.29195	2.00169	4.96112	2.00954	1.9263	1.57164	1.18805	2.31477	1.90635	1.95595	0.848769	2.33428	2.05479	2.17665	4.10365	1.42754	1.38213	1.61389	2.1289	2.41233	3.67279	3.78347	2.48159	3.3006	1.79435	1.59423	1.99851	1.34177	3.64112
NAGLU	1.78343	1.09315	10.1495	2.34137	0.848192	2.79948	0.609658	0.784414	1.92923	0.934535	0.0401902	1.75827	0.694037	1.10213	0.933696	1.41188	1.39197	1.76894	10.705	0.34927	2.85144	1.97038	2.71338	0.953585	0.920432	4.08106	16.3429	0.78226	0.892393	1.07676	0.0829299	0.599806	1.06475	0.81947	0.737799	0.633009	1.03048	1.28259	1.58033	1.21268	0.603871	0.279607	10.9057	0.258216	1.59219	1.42673	0.701902	0.414357	1.21364
NDUFA4	0.418108	0.736197	0.514152	0.546188	1.77735	1e-05	0.193584	0.0312477	1.68521	1.09083	0.902833	1e-05	0.866614	1.06551	3.73988	0.527356	3.66681	1.53074	2.60902	21.3605	0.111679	5.94968	1e-05	1.29547	0.939921	1.01604	0.574369	1.9428	0.838163	0.987308	0.461388	0.172949	1.05455	5.71971	0.441293	0.713465	0.637683	1.19568	0.293821	0.557344	0.891572	1.35166	0.468861	17.4084	1.87786	1.47251	1.05719	0.0811834	1e-05
NDUFAF3	142.941	68.4742	54.1907	36.874	158.026	173.954	62.3948	116.717	146.535	1e-05	214.516	102.925	58.15	148.835	109.427	1e-05	144.582	46.6042	1e-05	0.158599	114.691	114.571	54.082	119.832	170.731	186.784	189.114	139.195	135.825	92.1556	128.838	149.146	175.67	1e-05	159.769	163.521	195.417	136.333	1e-05	151.173	1e-05	1e-05	99.7682	150.085	123.365	203.997	1e-05	14.8024	71.3677
NDUFS3	0.646657	8.59441	6.30606	1e-05	1.07943	1e-05	1e-05	1.8383	0.112494	0.063039	1e-05	1e-05	1e-05	1e-05	1e-05	1e-05	1e-05	1e-05	1e-05	1e-05	10.007	1e-05	3.20031	1e-05	1e-05	0.0619581	0.0458983	1e-05	0.00207064	2.0859	2.27061	0.0222337	1e-05	0.113306	1e-05	0.458244	0.0557219	1e-05	0.847172	1e-05	1e-05	0.0475782	1e-05	1e-05	4.43567	0.00870405	0.126654	0.0322443	1.85312
NEO1	0.244644	1.42955	3.68626	0.27615	0.263549	0.624436	3.74334	0.362552	1.12956	0.594988	0.594313	2.69667	1.68625	0.81792	0.760186	2.1842	0.957367	0.883643	0.512573	1.45677	2.07997	1.95554	3.98656	1.73668	0.319933	2.02254	1.38286	0.4914	0.233945	0.583515	0.515534	1.00738	1.2754	1.07653	1.52999	0.712912	0.827155	0.536045	4.89769	1.10641	0.541235	0.91294	0.823834	0.722663	0.125227	1.29562	0.448032	1.43276	0.0783304
OLFM1	4.44362	5.26385	6.73699	8.59395	3.89894	3.88165	5.15808	3.22838	10.1611	2.26863	2.90104	2.53992	4.13628	3.94154	4.13941	3.21234	4.12016	3.48635	6.16292	2.71941	5.41345	4.31551	4.78958	5.18381	2.39129	4.70111	5.94262	3.0061	3.97238	2.47665	4.96776	4.61623	3.69451	4.54657	2.21025	4.39614	4.1306	2.25071	2.86503	4.44313	4.02719	5.34429	2.25232	4.08732	1.8516	6.84619	4.43286	2.21616	1.86716
P2RX4	0.54805	1e-05	1e-05	1e-05	1e-05	0.265699	1e-05	1e-05	1e-05	1e-05	0.188937	1e-05	1e-05	1e-05	1e-05	1e-05	1e-05	1e-05	1e-05	1e-05	0.584082	1e-05	1e-05	1e-05	1e-05	1e-05	1e-05	1e-05	1e-05	1e-05	1e-05	1e-05	1e-05	1e-05	1e-05	1e-05	0.136993	1e-05	1e-05	1e-05	0.88899	0.942428	1e-05	1e-05	1e-05	1e-05	1e-05	0.655293	1e-05
PABPC1	1.6024	1e-05	3.03018	0.0550777	1e-05	2.30292	1e-05	1.55972	0.0333517	0.986352	2.18605	0.895104	0.28514	1e-05	0.180606	0.047247	0.257306	0.305825	1e-05	3.15533	1.662	0.795744	3.80419	1.87734	0.0391704	0.928996	1e-05	1e-05	1e-05	0.730117	1.75788	4.15813	2.94272	0.304674	1.01855	2.2278	2.29662	0.0109398	1.03641	0.0995453	3.54106	1e-05	1e-05	0.0649107	1.69297	1.04432	0.222063	1e-05	0.778241
PABPC3	0.166328	1e-05	0.878783	1e-05	1e-05	0.396393	1e-05	1.42108	0.0303871	1e-05	1.88558	0.570536	1e-05	1e-05	0.164552	0.0430472	0.150787	0.00230174	1e-05	2.77401	1.44897	1e-05	0.283307	1e-05	0.0356886	1e-05	1e-05	1e-05	1e-05	0.658737	0.784485	1.94785	1e-05	0.277592	0.851084	0.0798926	1e-05	1e-05	0.944284	1e-05	0.135232	1e-05	1e-05	1e-05	0.946259	0.95149	1e-05	1e-05	1e-05
PABPC4	1.62288	1e-05	1.01013	0.0564547	1e-05	1.53721	0.0126456	1.59871	1e-05	1.0399	2.2407	0.917482	0.292269	1e-05	1e-05	1e-05	0.0656315	0.847801	1e-05	3.23421	1.97924	0.238622	0.723094	1e-05	0.0401496	0.163924	1e-05	1e-05	1e-05	0.74837	1.80183	2.19133	0.232741	1e-05	0.859785	0.0898791	1e-05	1e-05	1.06232	0.102034	0.194313	1e-05	0.215851	0.0665335	1.06454	1.22652	0.227614	1e-05	0.183368
PCF11	0.0644023	1e-05	1e-05	0.068521	1e-05	1e-05	1e-05	1e-05	1e-05	1e-05	1e-05	1e-05	0.140585	1e-05	1e-05	0.0772459	1e-05	1e-05	1e-05	1e-05	0.324187	1e-05	1e-05	1e-05	1e-05	1e-05	1e-05	1e-05	1e-05	1e-05	1e-05	0.383867	1e-05	1e-05	1e-05	1e-05	1e-05	1e-05	0.060535	1e-05	0.130738	0.00334576	1e-05	1e-05	1e-05	1e-05	1e-05	0.355094	1e-05
PCOLCE	10.9516	6.2624	5.63645	6.88208	2.60155	7.51303	2.21525	8.70308	3.7693	6.4549	5.7174	11.1433	4.5683	4.16258	9.39925	6.63414	7.56009	5.92553	2.69642	4.91945	16.1419	6.65826	5.2646	6.17624	2.69971	3.58894	2.83489	4.43061	1.93152	4.48225	6.80249	3.31217	8.50397	14.028	6.21208	5.62	4.18451	5.92589	8.60545	8.75921	5.87851	2.96646	6.25023	4.45348	9.05593	4.94084	4.36124	0.447135	4.78485
PCSK9	0.716839	0.990325	0.756185	2.65355	2.38236	4.26019	0.180018	1.46781	5.11821	0.0965049	6.9848	0.725234	4.42262	0.838003	0.0729397	0.0425838	0.272259	0.271147	3.39545	7.70973	1.80306	0.415731	2.20193	1.39734	6.21171	0.459495	0.675543	0.828532	2.61624	2.80981	1.71678	1.79518	0.371292	0.253058	1.11574	0.185137	0.0159368	8.77312	2.41712	7.5613	1.80799	0.12397	1.53689	0.679066	0.257881	1.4765	0.236152	1e-05	1.57051
PCYOX1	5.60129	5.80766	3.67948	4.07481	2.16823	3.81334	0.0487718	8.98824	6.34026	7.91903	2.51785	5.61066	13.4908	5.61092	7.25315	3.29839	7.89596	5.42477	4.3505	7.99401	4.45126	5.65229	2.80638	5.4183	10.2656	8.10434	8.12025	2.5669	1.33135	9.43487	3.0237	2.61269	4.74007	2.09084	6.47406	8.12193	2.63964	12.142	13.5792	4.28182	8.9646	7.90616	2.36274	8.68444	6.91037	4.2208	2.93568	4.90111	3.883
PHB2	6.45104	10.6845	26.7669	2.23693	6.64552	14.8711	54.8013	3.39497	13.5249	5.20687	2.09685	2.81813	6.09084	0.30363	1.91796	15.9898	222.979	29.8645	2.73809	227.067	7.08486	5.60207	4.27868	3.48074	17.901	1.96443	5.54441	24.0557	3.65305	4.61487	2.86584	1.78951	2.36568	130.952	5.50717	3.35674	2.77135	45.1344	4.69913	1.69631	17.5355	1.11203	41.6651	69.137	2.17396	1.95702	5.10628	4.72409	7.80931
PLG	397.406	376.901	289.666	539.577	378.962	329.502	341.511	363.393	411.255	485.09	407.618	333.453	412.573	443.833	470.777	268.969	373.501	479.539	465.741	320.601	388.103	350.13	325.487	523.285	472.609	572.622	425.876	456.96	275.571	318.588	249.571	364.006	376.628	421.323	420.791	425.869	476.684	468.222	402.812	511.11	519.588	440.681	401.6	371.228	311.045	436.113	408.496	393.264	197.46
PLGLA	164.661	129.687	51.4743	137.965	104.801	82.8005	107.952	114.545	156.742	148.518	108.85	60.2208	126.02	141.712	164.848	89.1308	108.92	163.258	160.056	115.558	124.578	32.3919	42.1697	187.281	150.769	181.745	168.984	162.214	72.5553	75.3922	3.36425	129.289	120.467	157.725	107.792	134.54	189.339	174.535	183.798	140.914	208.826	165.021	113.801	106.187	33.1347	161.825	113.856	125.942	64.7138
PLTP	16.2135	13.9173	9.99753	25.6689	10.3864	15.6745	68.5527	16.1546	63.6626	87.5242	75.1931	7.56868	21.395	47.5438	43.2625	11.0682	67.7985	56.8357	87.5821	51.2557	12.5219	6.02583	12.2881	42.1972	11.2046	70.8673	8.66302	27.4711	14.4405	16.3749	19.8859	83.6088	12.1315	11.837	6.28592	10.9932	8.90436	8.37686	10.9495	13.503	93.0621	8.43015	66.0308	22.0097	8.89489	77.035	8.46702	18.8148	12.3705
POLRMT	1e-05	1e-05	0.00835632	0.0429231	1e-05	1e-05	1e-05	1e-05	1e-05	1e-05	1e-05	1e-05	1e-05	1e-05	1e-05	1e-05	1e-05	0.0100611	1e-05	1e-05	1e-05	1e-05	1e-05	1e-05	1e-05	1e-05	1e-05	1e-05	0.0564554	0.00473522	1e-05	1e-05	1e-05	1e-05	1e-05	0.0590373	1e-05	1e-05	1e-05	0.00224953	1e-05	1e-05	1e-05	1e-05	1e-05	1e-05	1e-05	1e-05	1e-05
PON1	202.567	167.53	223.456	136.036	159.103	233.919	113.104	213.825	187.744	206.802	169.625	247.451	141.396	314.009	202.412	173.172	352.183	185.352	113.562	212.885	218.151	147.863	160.464	210.039	175.557	208.642	175.344	211.419	176.204	226.978	368.578	125.134	232.698	81.4091	129.429	225.268	138.907	134.44	267.788	138.769	134.326	351.914	118.611	242.581	242.216	139.854	189.621	65.3308	148.464
PPP1CA	3.0991	3.55661	4.04046	6.56518	2.43315	1.96611	2.86491	5.65797	5.76724	4.27173	3.77876	4.47707	3.07462	4.86856	10.1673	1.57902	8.54052	3.32751	3.85243	1.63248	1.97729	1.23424	4.76588	7.03222	2.87764	6.22605	5.92956	3.39144	1e-05	2.86271	0.490489	4.43606	8.06792	6.38548	7.70361	8.42649	5.09932	6.17743	11.9073	5.02628	4.54835	9.00025	3.27898	1e-05	7.54129	5.33642	4.87056	1e-05	2.61677
PPP1CB	3.09068	5.3003	4.03467	6.56518	2.55606	2.42654	4.49721	5.58891	5.76724	4.26242	3.93932	4.58418	3.04476	4.86856	10.1673	1.59985	8.53221	3.7758	3.80813	1.63248	1.95317	1.14144	4.77235	10.1474	5.11638	6.18247	5.91313	3.39144	1e-05	3.01032	1e-05	4.1776	8.29676	6.28122	7.78373	8.42649	5.2999	6.17743	13.6544	17.5291	4.54835	9.06677	6.44304	1e-05	6.11197	5.33642	10.6863	1e-05	2.61677
PPP1CC	3.0991	3.55661	4.04046	6.56518	2.43315	1.96611	2.86491	5.65797	5.76724	4.27173	3.77876	4.47707	3.07462	4.86856	10.1673	1.57902	8.54052	3.32751	3.85243	1.63248	1.97729	1.23424	4.76588	7.03222	2.87764	6.22605	5.92956	3.39144	1e-05	2.86271	0.490489	4.42626	8.06792	6.38548	7.70361	8.42649	5.09932	6.17743	11.9073	5.02628	4.54835	9.00025	3.27898	1e-05	6.25667	5.33642	4.87056	1e-05	2.61677
PPWD1	0.15347	1e-05	1e-05	1e-05	1e-05	1e-05	1.07485	2.52045	1.47424	1e-05	1e-05	1e-05	1e-05	1e-05	1e-05	1e-05	1e-05	1e-05	1e-05	0.034507	2.01462	0.309722	1e-05	1e-05	1e-05	0.0363394	1e-05	1e-05	1e-05	1.82768	1e-05	1e-05	1e-05	1e-05	0.855004	1e-05	1e-05	1e-05	1.58871	1e-05	1.27582	1e-05	1e-05	1e-05	1e-05	1e-05	1e-05	1e-05	1e-05
PRG4	1.08712	1.84008	2.86959	0.716881	2.25659	2.82178	0.750775	4.51611	1.43487	3.3105	3.03998	3.79898	1.80056	1.93957	0.395035	4.03208	1.07617	0.614916	2.58945	2.84431	0.245833	2.01107	5.14534	0.742945	2.95681	3.81207	2.2826	1.3121	5.52235	5.48698	6.00662	2.74175	4.96084	0.564091	4.07336	3.87463	1.44598	1.15827	6.24251	0.753851	2.02351	2.38904	3.17353	3.26515	3.00299	1.65233	1.45938	0.416466	5.16876
PRKCSH	1.39218	1e-05	0.469558	2.23221	2.17266	2.31549	0.499127	0.0918462	0.189249	0.314219	1e-05	0.351292	1.75907	0.0943955	1.11682	1.64528	1.44134	0.439021	0.313921	2.04801	0.950201	0.507824	0.41157	0.140938	1.94302	1e-05	1.5027	1e-05	0.088272	0.108446	0.163043	0.646289	0.972764	0.700102	1.12731	0.176808	0.191266	1.66308	1e-05	0.213703	1e-05	0.251457	1e-05	0.13529	0.620306	1e-05	0.242968	0.321912	2.82203
PRKDC	0.00317647	9.1133	0.200283	2.09301	28.8317	22.4997	6.3235	8.23452	6.82049	1.78468	12.2279	0.589238	5.53933	5.64017	25.2007	0.0563574	11.4333	0.790927	7.84077	36.6433	0.0513237	4.94523	0.619355	1.38412	16.6342	17.3009	20.2104	11.573	7.44993	10.5797	6.13754	1.93778	2.13517	12.136	6.43611	11.3761	15.861	19.0399	5.29539	0.976564	24.2755	4.98641	0.983853	4.75344	18.1575	1.9724	5.44873	2.16138	5.92311
PROZ	12.9607	12.5667	19.1368	13.6465	11.9343	5.61279	13.9541	22.8682	17.6282	13.6485	12.5201	17.6656	13.9361	23.0594	13.6288	20.7219	11.6034	13.1517	10.3888	9.21489	15.0157	11.6364	17.8583	15.6484	11.6527	14.9493	13.2619	13.1994	15.2756	19.4296	10.7848	12.9636	11.4228	14.4325	31.2272	15.6787	10.0328	10.7199	11.0502	19.6221	18.7988	13.4368	8.37028	15.6253	15.735	21.3317	25.412	12.7098	15.9331
PSMC2	15.8774	11.3906	17.6078	10.0833	19.7036	25.4544	3.53178	14.6213	11.3606	24.393	6.07416	18.5616	11.7567	12.5014	9.3783	10.2812	38.0468	6.07094	21.7305	34.7805	11.5989	16.6886	18.8955	15.3117	26.4792	10.7712	21.105	16.4313	19.7856	14.8534	18.8915	6.73319	25.4699	6.46005	13.0052	18.5352	10.6024	16.6433	13.571	11.0368	13.0781	21.8157	8.18619	25.1053	25.4317	12.4496	12.955	8.36449	10.6863
RABGGTA	20.3805	24.2148	29.8524	11.8268	36.8868	33.941	69.9577	32.5252	30.5436	41.0805	38.2865	7.57002	10.0147	39.12	32.9137	1e-05	32.0909	38.901	26.0721	21.9563	30.3895	14.8693	24.8498	36.8787	25.8166	28.3452	32.13	37.79	86.6882	38.2221	45.2901	66.218	31.1916	51.4716	24.4976	24.8783	40.2493	32.3648	23.1211	47.9009	34.1497	36.7641	42.9667	39.4142	22.234	32.9787	22.0939	57.454	14.9671
RAP1A	8.50306	11.9942	12.4545	17.2483	9.29731	10.1091	8.70617	8.98286	15.3506	14.9492	8.64527	3.8757	18.0411	12.5221	19.2039	4.73716	0.976911	0.040359	11.1868	8.82532	22.9919	26.0242	14.3397	21.2808	1e-05	10.1038	16.7081	20.558	13.617	0.612872	31.776	12.9234	8.3776	8.86926	7.879	4.20564	10.9915	18.5396	4.6702	10.6106	9.21858	7.44813	0.0672654	10.7894	2.04619	9.9653	11.4716	13.4273	0.439498
RAP1B	7.08588	9.99519	10.3788	14.3736	7.74776	8.42427	7.25514	7.48572	12.7922	12.4577	7.20439	3.22975	15.0343	10.435	16.0033	3.94764	0.814092	0.0336325	9.32231	7.35443	19.1599	21.6868	11.9498	17.734	1e-05	8.41981	13.9234	17.1317	11.3475	0.510726	26.48	10.7695	6.98133	7.39105	6.56584	3.5047	9.1596	15.4497	3.89183	8.84214	7.68215	6.20678	0.0560545	8.99117	1.70515	8.30441	9.55967	11.1894	0.366248
RBP4	339.933	317.156	428.587	409.656	229.158	243.477	226.778	532.282	465.314	394.185	330.668	551.562	293.402	326.891	865.809	489.848	784.282	322.584	307.609	158.227	357.543	323.291	406.684	604.175	342.655	560.333	604.509	312.916	122.99	342.825	284.544	328.598	677.505	528.926	623.328	717.917	410.459	449.79	909.282	441.649	369.332	514.197	307.507	222.137	615.119	489.032	346.406	330.191	306.222
RCN1	30.4037	31.6201	19.8364	27.3925	79.1534	79.9769	83.1248	29.3084	42.5148	39.8207	57.1789	18.4122	49.6255	80.0038	62.8835	68.3134	48.7003	30.8693	73.6728	52.4871	39.9129	31.758	24.8336	41.8606	39.2021	26.5182	52.8623	44.5859	205.692	83.9593	56.3061	66.1373	49.7558	86.8276	16.3434	25.5545	127.627	66.2714	25.0752	45.5339	27.7861	58.5219	71.5655	118.528	16.2536	40.3425	80.3405	64.7999	101.174
RPS6	15.6549	1e-05	15.7961	7.94714	1e-05	0.0492728	1e-05	18.4	1e-05	1e-05	1e-05	1e-05	1e-05	1e-05	2.87488	12.6108	0.691013	1e-05	9.26445	0.0359974	1e-05	8.46617	1.68377	0.0484033	0.357419	1e-05	1e-05	1e-05	1e-05	0.484879	1e-05	0.856089	1e-05	3.36778	0.0325783	1e-05	1e-05	1e-05	0.453961	6.35183	0.0478005	1e-05	23.6074	1.76013	1e-05	1e-05	0.069753	0.105475	7.63233
RPS6KA1	5.42675	1.47923	0.104349	16.2646	8.09245	1e-05	1e-05	1e-05	1e-05	1e-05	8.88104	1e-05	0.138603	7.15243	1e-05	3.35435	14.4782	1e-05	8.30582	1e-05	6.04034	0.139314	0.209099	1e-05	4.79391	0.501841	10.8092	13.1864	1e-05	0.222666	0.136029	1e-05	1e-05	1e-05	1e-05	1e-05	10.8402	1e-05	0.62282	1e-05	9.60277	8.64378	0.116468	1e-05	0.136425	8.95649	13.5918	20.0096	1e-05
RPS6KA3	5.20064	1.25511	0.111408	15.5541	7.75526	1e-05	1e-05	1e-05	1e-05	1e-05	8.51099	1e-05	0.343829	6.85441	1e-05	3.21458	13.8983	1e-05	7.95975	0.332816	5.78866	0.13351	0.200387	1e-05	4.59416	0.480931	10.3589	12.637	1e-05	0.213388	0.143314	0.0348139	1e-05	1e-05	1e-05	1e-05	10.3885	1e-05	0.675072	1e-05	9.20266	8.28362	1e-05	1e-05	0.13074	8.5833	13.0255	18.9552	1e-05
RPS6KA6	5.42675	1.30968	0.116252	16.2303	8.09245	1e-05	1e-05	1e-05	1e-05	1e-05	8.88104	1e-05	1e-05	7.15243	1e-05	3.35435	14.4782	1e-05	8.30582	1e-05	6.04034	0.139314	0.209099	1e-05	4.79391	0.501841	10.8092	13.1864	1e-05	0.222666	0.149545	0.0363276	1e-05	1e-05	1e-05	1e-05	10.8402	1e-05	0.62282	1e-05	9.60277	8.64378	1e-05	1e-05	0.136425	8.95649	13.5918	19.7398	1e-05
SAA1	28.9507	28.4337	24.3524	12.8735	675.869	117.034	2894.05	12.9738	8.9678	18.1486	351.847	98.596	123.053	7.37315	119.141	720.382	160.123	12.6072	38.1232	53.1039	33.1964	24.6064	20.5956	6.83147	16.659	19.5718	50.9516	21.3272	3512.34	499.757	29.7367	3397.82	46.2775	68.0358	22.5241	15.1379	94.847	11.8362	9.0977	32.7227	8.34627	13.823	262.282	2126.98	114.882	13.0458	24.606	734.448	3543.83
SAA2	23.1247	24.6206	12.2073	11.1488	170.372	30.3178	1115.65	11.3185	1.91254	2.60521	103.052	59.8624	47.6957	0.61789	23.4626	338.688	69.3156	1.20346	9.84538	33.9333	29.3849	13.3082	13.857	2.13452	2.05141	4.01608	23.3891	4.06194	1336.51	195.534	9.11339	1575.45	14.6095	25.1446	5.35371	4.45403	20.8687	0.904368	2.43481	2.86419	2.07891	2.2116	81.7216	472.406	67.8463	3.64541	14.2472	319.87	1874.55
SBF1	0.225837	1e-05	1e-05	1e-05	1e-05	1e-05	1e-05	1e-05	0.1028	0.0215867	1e-05	1e-05	1e-05	0.0912435	0.145691	0.00364403	0.0855661	1e-05	0.0451847	1e-05	1e-05	0.00721406	1e-05	0.0717495	0.00542132	1e-05	0.0571556	1e-05	0.0421766	1e-05	1e-05	1e-05	1e-05	1e-05	1e-05	1e-05	0.109373	1e-05	1e-05	0.0833376	1e-05	1e-05	1e-05	1e-05	1e-05	0.0184297	1e-05	0.135112	0.010972
SCIN	0.207947	0.0474082	0.271267	1.14685	0.322713	0.438824	2.39631	0.257763	1e-05	0.683153	1.00541	0.354056	0.0639072	0.564728	1e-05	0.239485	2.45714	2.13059	1.64311	0.358377	0.149944	1e-05	0.360825	1.86326	0.560503	0.179991	0.728507	3.08132	0.429777	0.255614	0.958257	1.19603	2.85745	1e-05	4.67219	0.358873	3.50811	2.60229	0.485607	0.15369	3.68604	0.448284	0.0176963	1.50835	0.146737	2.46569	0.416609	0.524037	0.519927
SELENOP	61.5152	56.1349	45.2535	107.135	42.5657	43.3688	56.7978	78.7602	48.8658	66.5012	61.9204	48.8873	53.9966	67.3543	63.1425	47.1278	34.084	76.4192	69.4264	39.146	67.1474	52.7391	44.8572	57.1491	66.9924	65.2169	53.5975	62.2898	23.986	88.0592	29.1615	43.6724	61.0824	71.7943	57.4169	58.9025	49.0275	57.407	56.6608	73.2342	48.563	72.242	58.4774	51.9122	46.8901	49.3412	58.6697	53.945	32.6197
SEPTIN2	3.4789	1.7336	0.36292	2.09685	1.71172	7.52873	3.86158	4.02135	0.847084	0.0237279	0.305931	1e-05	4.2267	0.736616	1e-05	0.533113	2.95883	1.29693	0.166108	1.94057	0.963317	4.1049	2.38772	10.3607	0.886904	0.685958	0.969438	1.05633	14.7267	0.836586	1.96656	0.310804	2.52236	3.71658	2.18155	1e-05	9.70931	1e-05	2.40958	1.20067	1.46143	0.849566	2.48054	3.72977	3.79785	0.133615	0.935245	1.62745	0.261955
SERPINA10	11.2024	8.62463	70.3343	7.25969	9.02087	8.4854	5.44975	42.1916	12.6558	20.5346	12.3156	8.87527	8.91681	19.4009	12.215	16.8753	11.4424	5.24682	16.0094	15.1867	10.4427	7.82234	16.5532	11.8741	18.8134	10.7678	9.646	8.37596	22.335	27.1138	68.6536	24.4418	24.2881	9.77322	15.3581	11.281	19.0283	12.0282	15.0824	16.2118	16.694	20.101	20.1763	25.4974	8.25535	15.2996	17.9738	2.84261	14.7521
SERPINA3	3080.02	3949.06	3476.04	2475.16	4731.05	4392.98	8053.68	3441.67	3646.23	4122.87	4666.96	3034.84	3471.99	4061.91	4385.18	4109.52	4915.72	4986.79	2412.2	4305.99	3042.49	3624.31	3112.79	3260.76	2693.87	3009.3	3455.85	4098.58	8675.15	4010.76	3855.67	5946.81	2804.16	5738.81	2704.89	2888.67	5313.26	4123.18	3055.22	4777	4665.43	3840.26	5332.66	4906.97	3192.58	3815.22	4615.13	6844.79	4157.43
SERPINB12	9.29932	18.0873	13.7898	4.85117	3.02769	12.1302	3.17202	1.84106	0.5384	25.5852	23.5727	16.4269	11.7347	6.83057	0.459854	10.1359	1.06862	0.524711	6.22631	1e-05	10.0813	11.4485	14.4607	3.72217	2.60315	5.44052	5.05232	11.3714	4.57379	2.56451	6.61778	23.5491	4.66719	0.288363	2.27372	3.65963	4.21773	0.277519	3.80007	14.4921	10.8278	6.70528	7.7583	6.4097	15.4386	20.6068	6.53102	3.65684	22.4563
SERPINC1	2865.7	2486.41	2285.84	3304.43	1891.99	2486.32	2516.05	2439.59	2609.27	2950.21	2360.16	2409.31	2579.6	3128.47	2879.17	2602.78	2604.27	1740.22	2640.79	1032.52	2659.32	2429.39	1347.17	3566.64	2396.14	2755.2	2278.29	2786.57	1466.59	2219.18	1675.63	984.742	2606.36	2134.51	2300.4	2088.91	2841.23	2851.5	2411.02	2791.29	2716.99	2916.95	1108.73	2375.86	2468.26	2751.04	2922.77	2971.91	1739.69
SERPINE1	7.02714	3.40306	1.16922	23.2261	18.3263	3.5776	43.723	3.50568	54.6117	19.2119	21.2153	1.94837	4.02946	51.2996	67.7833	6.99535	1.71628	60.6198	52.8563	6.10573	5.85376	1.31231	4.1785	72.4053	2.88489	74.8286	73.1672	93.7102	28.4502	3.91821	3.61958	19.3103	41.8384	96.0819	75.6832	68.9781	66.1136	72.9135	33.8835	61.9333	31.2459	6.85573	19.794	21.761	1.15477	56.8891	28.5701	1e-05	2.86014
SF3A1	0.610894	0.00610208	1e-05	1.3254	1.11577	0.165858	1e-05	0.977911	0.918252	3.41533	1.13132	0.217969	1e-05	1.78	0.835966	1.34711	2.69052	1.13097	1.4173	0.346011	0.476179	0.674733	1e-05	0.789229	1.06913	1.35603	1.06158	1.00199	0.809943	0.774417	1.26432	1.40345	1.80827	2.61311	0.940876	1.70166	1e-05	1.10262	0.966726	0.985381	1.90235	2.00962	2.40567	1.10531	0.134961	1.23078	1.47436	1e-05	0.585047
SF3B2	1.55143	2.46785	3.64572	2.66388	0.0749407	3.29822	1.77286	1.97527	4.54985	14.4993	0.749763	8.41798	2.28083	4.32823	2.05349	2.62864	5.51646	2.51362	4.84667	1.63098	1.43307	3.16433	3.0616	4.11027	3.38744	9.20289	7.80281	5.94058	3.53501	0.882381	6.49415	3.267	4.86138	5.6109	5.01146	4.80803	3.57099	2.80328	1.56183	1.75532	6.92322	1.48034	4.00767	1e-05	4.35675	3.0825	4.26392	2.79081	1.9338
SIRPB1	0.064412	1e-05	1e-05	2.58432	0.998428	0.577045	5.05408	0.131254	8.43959	13.6667	1e-05	1e-05	1.18175	9.90368	3.15408	0.583569	1.46862	4.04008	4.74437	0.166425	1.97511	0.143172	3.21321	2.41384	1.67909	7.005	12.4622	0.759141	4.79199	1.19634	0.33404	0.156889	7.92856	1e-05	1e-05	1e-05	8.38242	3.78937	2.22467	9.98026	1e-05	1e-05	11.0642	1.70649	0.0195137	1e-05	0.128695	3.86759	0.0634206
SORT1	0.32124	1.67909	1e-05	1e-05	1e-05	1e-05	3.51671	1e-05	1e-05	0.113487	1e-05	0.506093	1e-05	1e-05	0.516105	1e-05	2.12963	2.25975	0.0338808	1.31737	1e-05	0.693921	1e-05	1e-05	1e-05	2.4144	1e-05	1e-05	1e-05	1e-05	1e-05	2.23574	1e-05	2.64576	0.969201	1e-05	1e-05	1e-05	1.54562	2.18089	1e-05	1e-05	0.0357936	1e-05	0.89889	2.64322	0.0157974	0.393685	1e-05
SPP2	0.16007	0.760704	0.509574	0.847829	0.449707	0.981474	1e-05	1.71506	0.0583458	0.324839	1e-05	0.598491	0.606957	1e-05	0.118386	0.223131	3.66838	0.128306	1e-05	0.182839	0.478251	1.1238	1.03112	1e-05	0.202609	1e-05	1e-05	0.877352	0.0424174	1.83069	1.65148	1e-05	1e-05	0.353594	1e-05	1e-05	0.0116901	1.62772	1e-05	1e-05	0.905481	1e-05	0.368971	1e-05	0.942471	1e-05	1e-05	0.127232	0.553847
SRRM2	0.108861	0.158182	0.259946	0.280416	3.21525	0.294757	1.815	0.255495	2.50232	0.299027	0.238235	0.340855	0.0429742	1.7094	3.22065	0.0554557	5.85954	5.22121	0.675544	7.52769	0.0603558	0.367086	0.576964	0.280696	0.22493	1.43796	0.416711	2.38797	0.37975	0.260315	0.38196	0.147269	0.317186	4.14174	2.11291	10.0137	5.10239	17.9743	0.173555	1e-05	10.1334	0.21204	14.3973	12.8865	0.251177	1.21896	18.1888	0.339313	0.171419
SRSF3	2.71515	0.0698893	1e-05	1e-05	1e-05	1.64107	1e-05	1e-05	1e-05	1e-05	0.0383531	1e-05	2.35621	1e-05	1e-05	1e-05	4.40025	1e-05	1e-05	1e-05	1e-05	1e-05	1e-05	1e-05	1e-05	0.0472033	1e-05	0.403233	0.0491827	0.0411709	1e-05	1e-05	1e-05	1e-05	1e-05	0.115909	1e-05	1e-05	1e-05	1e-05	1e-05	1e-05	1e-05	1e-05	0.106613	1e-05	1e-05	1e-05	1.74459
STAT2	0.0609659	1e-05	0.26332	0.0179606	1e-05	1e-05	1e-05	1.36268	1e-05	1e-05	1e-05	1e-05	1e-05	1e-05	1e-05	1e-05	1e-05	0.0132737	1e-05	1e-05	0.0688046	0.0188134	0.195488	1e-05	1e-05	1e-05	1e-05	0.774473	0.400408	0.315725	0.0868377	0.197056	1e-05	1e-05	3.00417	0.405995	1e-05	1e-05	0.0164043	0.037558	1e-05	1e-05	1e-05	1e-05	0.127723	1e-05	1e-05	1e-05	1e-05
STXBP3	3.59032	8.89974	1e-05	1e-05	0.00783252	1e-05	1.93406	0.310099	8.00145	0.0263277	6.71544	6.16886	0.0245373	1e-05	0.0358813	3.75078	3.1322	1e-05	5.18315	1e-05	2.4424	7.3247	3.88322	7.50597	5.83136	11.8893	7.4993	3.9028	2.32843	6.66715	4.13841	0.00720214	11.073	3.79049	13.2255	0.194161	5.47467	4.02493	0.198672	12.0219	7.23071	4.75816	5.42612	0.0116106	5.83814	12.1851	4.03697	1.25652	1e-05
TBC1D4	0.0285471	1e-05	1e-05	1e-05	1e-05	1e-05	1e-05	1e-05	0.041711	0.0573344	0.0146578	1e-05	1e-05	1e-05	1e-05	1e-05	1e-05	0.0598667	1e-05	1e-05	1e-05	0.0933474	0.0444436	1e-05	1e-05	1e-05	1e-05	1e-05	1e-05	1e-05	1e-05	1e-05	1e-05	1e-05	1e-05	1e-05	1e-05	1e-05	1e-05	1e-05	1e-05	0.044473	1e-05	1e-05	1e-05	1e-05	0.0539855	1e-05	1e-05
TFPI	0.00923867	1e-05	1e-05	1e-05	1e-05	1e-05	1e-05	1e-05	1e-05	0.135519	0.0687965	0.0207304	1e-05	1e-05	1e-05	1e-05	1e-05	1e-05	1e-05	1e-05	1e-05	1e-05	1e-05	1e-05	1e-05	0.048697	1e-05	1e-05	0.0124766	1e-05	1e-05	1e-05	1e-05	1e-05	0.0211857	1e-05	1e-05	1e-05	0.0687559	1e-05	1e-05	0.169872	1e-05	1e-05	0.0913347	1e-05	1e-05	1e-05	0.138132
TFRC	6.75942	13.2619	22.6139	4.34488	2.98739	9.57528	18.7782	2.81751	152.85	5.01009	1.22656	1.60703	1.86641	64.5584	9.34688	2.33819	15.7241	8.68998	24.3866	27.2433	16.8661	4.32858	30.6803	4.26916	5.70715	8.50151	24.2376	11.7015	5.24937	3.73404	9.65489	16.0275	3.55709	60.586	2.59886	4.67814	23.1288	12.0846	5.54589	1.22564	7.16136	3.98933	6.74563	3.72773	2.72801	92.4939	43.2635	0.990159	2.27052
TPSAB1	1.18243	0.173745	0.237485	1e-05	1e-05	1.84582	0.41783	0.9139	1e-05	1e-05	1.64426	1e-05	3.21678	0.789873	1e-05	1.41134	1e-05	1e-05	5.97241	1e-05	0.0121994	1e-05	0.550364	1e-05	1e-05	1e-05	1e-05	1e-05	1e-05	0.417516	1.27842	1e-05	1e-05	1e-05	3.83444	1e-05	5.81218	1e-05	1e-05	1e-05	1e-05	2.15733	1e-05	1e-05	1e-05	1e-05	0.102297	1e-05	0.767869
TPSB2	1.18243	0.173745	0.237485	1e-05	1e-05	1.84582	0.41783	0.9139	1e-05	1e-05	1.64426	1e-05	3.21678	0.789873	1e-05	1.41134	1e-05	1e-05	5.97241	1e-05	0.0121994	1e-05	0.550364	1e-05	1e-05	1e-05	1e-05	1e-05	1e-05	0.417516	1.27842	1e-05	1e-05	1e-05	3.83444	1e-05	5.81218	1e-05	1e-05	1e-05	1e-05	2.15733	1e-05	1e-05	1e-05	1e-05	0.102297	1e-05	0.767869
TPSD1	2.21706	0.325772	1e-05	1e-05	1e-05	3.39174	0.783431	1.71356	1e-05	1e-05	1e-05	1e-05	6.03146	1.48101	1e-05	2.64626	1e-05	1e-05	1e-05	1e-05	1e-05	1e-05	1.03193	1e-05	1e-05	1e-05	1e-05	1e-05	1e-05	0.782842	2.39705	1e-05	1e-05	1e-05	0.340086	1e-05	1.56148	1e-05	1e-05	1e-05	1e-05	1e-05	1e-05	1e-05	1e-05	1e-05	1e-05	1e-05	1.43975
TTR	1516.54	2264.05	2050.72	1523.34	617.52	1071.5	1005.43	1974.49	2423.38	1490.56	1225.53	2640.63	1129.53	1256.24	1846.07	1699.88	1428.84	1926.83	1696.78	961.683	971.694	2347.08	1901.16	2268.87	1131.52	2285.28	1944.33	996.303	547.975	1367.09	1236.53	1178.26	3248.64	1700.96	3360.78	2869.07	1221.72	1690.76	2753.9	3126.53	2126.82	1377.43	1638.77	1703.24	1931.56	2709.21	1198.79	1323.82	777.496
UBE2V2	0.0844699	1e-05	1e-05	1e-05	0.0225993	1e-05	0.0579987	0.0219451	1e-05	0.0752763	0.424691	0.0144526	1e-05	0.0193167	0.0287627	1e-05	0.180804	1e-05	1e-05	0.0738679	1e-05	1e-05	2.52379	0.0260439	1e-05	0.182778	1e-05	1e-05	1e-05	0.0726052	2.35922	0.560089	1e-05	1e-05	1e-05	1e-05	1e-05	1e-05	0.0630985	0.0180062	1e-05	0.0142889	0.72784	1e-05	0.0550895	0.0428579	0.311747	6.79868	1e-05
UBR4	0.00864492	0.00633759	0.176394	0.104808	0.89842	0.119813	1e-05	0.110102	0.0222547	0.409837	0.139027	0.234944	1e-05	0.16268	0.771004	0.197047	0.799612	0.831693	0.722002	0.00253384	1e-05	0.0817736	0.126938	0.136239	0.475849	0.0656464	0.165879	0.394484	0.702935	0.080087	0.325663	0.0653523	0.212815	1e-05	0.167022	0.0834194	1.3235	0.10537	0.603297	0.245301	1e-05	0.400572	0.85178	0.156222	0.107441	0.0667241	0.0661103	0.00325291	0.199093
VAC14	0.466108	1e-05	1.68097	0.160554	1e-05	1.24944	1e-05	1e-05	1e-05	1e-05	1e-05	3.01633	1e-05	0.19744	1e-05	1.52193	0.176453	1e-05	1e-05	0.0489114	0.638901	0.886688	1e-05	1e-05	1e-05	0.674671	0.934037	1e-05	1e-05	0.191764	1.69386	1e-05	1e-05	0.350611	1e-05	0.536879	0.388779	1e-05	0.635932	0.274473	0.289125	1e-05	1e-05	1e-05	1.89017	1e-05	1e-05	1e-05	0.747011
VWF	1.59103	0.754786	1.30218	1.86583	6.99401	3.89992	11.1233	3.98239	2.62278	21.1518	9.18086	1.25741	2.40546	16.1306	6.02922	5.21233	19.6332	2.69796	4.85523	4.79332	1.82743	1.07812	3.42079	2.6241	2.92056	2.52143	4.86906	4.58184	13.714	5.23976	4.63001	10.5715	17.1791	6.07566	2.798	4.26916	4.35163	2.85843	4.40634	2.59164	6.83935	9.70011	16.1157	10.7798	1.49042	2.83535	8.35974	1.26287	4.00794
WDR3	0.28261	0.713398	1e-05	1e-05	1e-05	1e-05	1e-05	1e-05	0.20594	1e-05	1e-05	1e-05	0.148122	1e-05	0.0434913	0.469089	1e-05	0.00677245	1e-05	1e-05	1e-05	1e-05	1e-05	0.0932686	1e-05	1e-05	1e-05	0.0338603	1e-05	1e-05	1e-05	1e-05	1e-05	1e-05	1e-05	1e-05	0.752022	1e-05	1e-05	1e-05	1e-05	1e-05	1.39028	1e-05	1e-05	1e-05	1e-05	1e-05	1e-05
ZFYVE19	8.93119	4.93828	1e-05	23.2768	1e-05	12.511	2.28474	4.92007	23.1759	5.80461	2.49513	4.75049	1e-05	2.2969	1e-05	4.19763	4.43864	1e-05	5.88976	4.72013	12.1334	5.35595	155.257	7.57062	2.94284	0.185678	13.6901	39.1521	2.87309	5.19433	6.52103	14.9789	1e-05	8.01103	2.1641	3.41713	2.88169	6.46594	6.79371	4.24056	8.17671	11.0007	39.7577	1e-05	3.05739	2.35427	1e-05	3.52209	2.58542
ZYX	2.56583	5.86649	3.01061	0.690608	2.42346	4.71386	3.02436	3.2525	6.88812	4.15752	9.07253	6.08337	1.88751	7.48988	1.75819	3.89744	1.12885	5.23332	2.97452	1.87033	2.32248	6.30832	4.00058	2.26876	5.63277	3.1298	11.0269	5.42621	5.01483	3.54588	3.664	5.10981	3.58489	3.04142	5.75623	3.4583	5.90774	5.47981	4.23144	3.62774	5.72314	5.71203	8.97569	3.93645	6.29406	9.41613	3.62048	0.904259	6.29024
AADAC	1e-05	0.0722616	1e-05	1e-05	1e-05	1e-05	1e-05	1e-05	0.0757497	1e-05	1e-05	1e-05	1e-05	1e-05	1e-05	1e-05	1e-05	1e-05	0.087513	1e-05	1e-05	1e-05	1e-05	1e-05	1e-05	1e-05	1e-05	1e-05	1e-05	1e-05	1e-05	1e-05	1e-05	1e-05	0.138444	1e-05	1e-05	1e-05	1e-05	1e-05	0.249167	1e-05	1e-05	1e-05	1e-05	0.133258	1e-05	1e-05	1e-05
AKAP9	1e-05	0.00528949	1e-05	0.0686949	1e-05	1e-05	1e-05	0.0240006	1e-05	1e-05	1e-05	0.107057	1e-05	0.403181	1e-05	0.0250841	1e-05	1e-05	1e-05	1e-05	1e-05	1e-05	1e-05	1e-05	1e-05	0.0208996	1e-05	0.234298	1e-05	1e-05	1e-05	1e-05	1e-05	1e-05	0.428556	1e-05	1e-05	1e-05	1e-05	1e-05	0.0599114	1e-05	0.0041049	1e-05	1e-05	0.58204	0.274154	1e-05	1e-05
AKR1B1	1e-05	1.09562	1e-05	1e-05	1.69958	0.366368	1.7181	1e-05	5.39871	1e-05	2.48287	1e-05	1e-05	1.06301	0.674475	0.616866	2.32619	9.82294	0.626609	1e-05	1e-05	1e-05	9.97108	1e-05	1.91351	2.27089	3.05265	1.23281	1e-05	1e-05	1e-05	1.39178	1.88653	4.32296	0.0597045	2.20479	2.09757	2.90117	1e-05	1e-05	5.10994	1.19485	4.59095	2.58868	1e-05	2.81201	4.18733	1e-05	1.08665
ANXA7	1e-05	0.0594811	1e-05	1e-05	1e-05	1e-05	1e-05	1e-05	0.0804978	1e-05	0.00594456	1e-05	0.509776	1e-05	1e-05	0.183539	1e-05	0.05201	1e-05	1e-05	0.190718	1e-05	1e-05	1e-05	0.0062125	1e-05	1e-05	0.128104	1e-05	1e-05	1e-05	0.147863	0.208384	1e-05	1e-05	0.124352	1e-05	1e-05	0.00516445	0.2593	1e-05	1e-05	1e-05	0.0511553	1e-05	0.244129	0.0225012	1.0641	0.631762
ATP11A	1e-05	0.0861561	1e-05	1e-05	1e-05	0.0612656	1e-05	0.225659	1e-05	1e-05	1e-05	0.925343	1e-05	0.123094	1e-05	1e-05	1e-05	0.0328315	1e-05	1e-05	1e-05	1e-05	0.11338	1e-05	1e-05	1e-05	0.233801	1e-05	1e-05	1e-05	0.119141	1e-05	1e-05	1e-05	1e-05	0.0124376	1e-05	1e-05	1e-05	0.502939	1e-05	1e-05	1e-05	1e-05	0.238877	1e-05	1e-05	1e-05	1e-05
COL14A1	1e-05	0.271189	0.220694	0.156952	3.28849	1.04472	0.348943	0.143288	1.92071	2.89941	3.64714	0.00760091	3.53849	0.095147	0.0195039	5.82722	6.79016	3.10298	1.86967	3.99151	0.282935	12.4968	0.321872	2.77574	7.12407	2.66763	0.0203962	2.50994	3.57641	0.0230164	0.0355135	5.91688	6.08391	0.262885	3.47193	6.38829	2.65031	0.018328	3.0233	7.03716	0.826278	2.16545	0.202263	1.81053	0.0104465	0.104083	0.213524	0.459031	6.41076
CTBP2	1e-05	1.04161	1e-05	1e-05	0.0502415	0.0274234	1e-05	1e-05	1e-05	1e-05	1e-05	0.219371	1e-05	1.21679	1e-05	0.794383	1e-05	0.118931	1e-05	1e-05	1e-05	1.16697	1e-05	1.83216	0.0918264	1e-05	1e-05	1e-05	1e-05	1e-05	0.310655	1e-05	1e-05	0.0569823	0.784908	1e-05	1e-05	1e-05	0.0351463	1e-05	0.00848763	1e-05	1e-05	1e-05	1e-05	1e-05	1e-05	1e-05	1e-05
CTNNBL1	1e-05	0.265668	1e-05	1e-05	1e-05	0.00700331	0.977986	1.13873	1e-05	1e-05	1e-05	1e-05	1e-05	0.990609	1e-05	1e-05	1e-05	1e-05	1e-05	1e-05	1e-05	1e-05	1e-05	0.198794	1e-05	1e-05	1e-05	1e-05	1e-05	0.0675056	1e-05	1e-05	0.0711241	0.685329	1e-05	1e-05	1e-05	0.486803	1e-05	0.0688478	1e-05	0.590025	1e-05	1e-05	1e-05	1e-05	1e-05	0.720399	1e-05
ECH1	1e-05	124.028	24.9269	1e-05	1e-05	1e-05	111.999	0.306893	0.015028	0.149984	0.0858606	107.339	1e-05	1e-05	1e-05	0.0212835	1e-05	1e-05	1e-05	13.8839	8.83986	134.957	1e-05	1e-05	0.00881554	1e-05	69.4142	2.43801	1e-05	1e-05	1e-05	1e-05	150.418	116.507	0.140723	0.298466	1e-05	44.2938	0.203665	1e-05	0.0401728	0.126986	0.332772	0.144176	17.8508	1e-05	1e-05	0.300103	0.0393517
ELP1	1e-05	17.3274	1e-05	1e-05	1e-05	1e-05	0.0247342	1e-05	1e-05	1e-05	0.00341957	1e-05	1e-05	1e-05	1e-05	1e-05	1e-05	1e-05	0.00249229	1e-05	1e-05	1e-05	22.4002	1e-05	1e-05	1e-05	1e-05	8.96598	1e-05	1e-05	1e-05	0.0158737	1e-05	1e-05	1e-05	1e-05	1e-05	11.1267	1e-05	1e-05	1e-05	1e-05	1e-05	1e-05	1e-05	1e-05	1e-05	1e-05	1e-05
FERMT2	1e-05	38.7845	1e-05	1e-05	8.3198	1e-05	0.0169873	0.281219	18.798	23.2225	13.9613	1e-05	1e-05	16.0754	0.0245781	22.0072	1e-05	0.0327514	0.330307	2.76112	0.0789944	1e-05	0.164999	5.46597	27.1255	14.2422	12.1737	18.3772	2.3808	0.134898	0.0386096	1.77908	24.4262	1e-05	4.19398	10.6911	12.3757	14.6518	20.4203	5.75686	11.2246	0.193465	1e-05	1e-05	0.707497	5.58998	18.8972	55.3912	1e-05
GNA11	1e-05	0.107998	1e-05	0.00320205	0.166187	0.0312774	0.0804198	0.0609383	0.709973	0.0656898	0.0257753	0.0137966	0.624479	0.358348	1e-05	0.0828899	1e-05	1e-05	0.347196	1e-05	0.0347983	1e-05	1e-05	1e-05	0.162586	0.271221	0.062137	0.271036	1e-05	0.0146213	1e-05	0.0556975	0.760207	1e-05	0.215852	0.887597	1e-05	1e-05	0.0124239	0.31448	0.225509	0.421235	0.0169308	0.0125889	0.0694002	0.672634	0.0561411	0.159776	0.117743
GNA14	1e-05	0.092791	1e-05	0.00307397	0.159539	0.0300264	0.0772031	0.0585007	0.681574	0.0630622	0.0247443	0.0132447	0.53562	0.344014	1e-05	1e-05	1e-05	1e-05	0.333308	1e-05	0.0334064	1e-05	1e-05	1e-05	0.156082	0.260373	0.0596515	0.260194	1e-05	0.0140365	1e-05	0.0534696	0.729799	1e-05	1e-05	0.852093	1e-05	1e-05	0.0119269	0.301901	0.216489	0.316641	0.0162535	0.0120854	0.0196863	0.645729	0.0538954	0.0190366	0.0840727
GPD1L	1e-05	0.114463	1e-05	1e-05	0.0211295	1e-05	1e-05	2.25062	1e-05	1e-05	1e-05	1e-05	1e-05	1e-05	0.410401	0.0915768	1e-05	1e-05	1.46789	1e-05	1e-05	1e-05	1.25378	0.447482	1e-05	0.858698	1.00813	1e-05	1e-05	1.18876	1e-05	1e-05	0.0438204	1e-05	0.921657	1e-05	1e-05	1e-05	1.00005	1e-05	1e-05	1.12764	0.0137264	1e-05	0.621238	1.00889	1e-05	1e-05	1e-05
H2AZ1	1e-05	0.0942222	1.13503	0.465147	0.235765	0.366462	0.215973	2.50729	1.68631	1e-05	0.514047	0.0369648	0.125781	1e-05	0.170446	0.0702307	0.307563	0.256245	0.0358013	0.0317653	0.102127	0.227559	0.380153	0.0934913	1e-05	1.42205	0.512273	0.354479	0.472131	0.222657	0.363426	0.425939	0.165214	0.352022	0.166199	0.33689	0.0595967	0.150301	0.328763	0.112137	1.17563	0.105972	0.273957	0.0964279	0.0346434	0.282456	0.168791	0.111645	0.16562
H2AZ2	1e-05	0.0942222	1.13503	0.465147	0.235765	0.366462	0.215973	2.50729	1.68631	1e-05	0.514047	0.0369648	0.125781	1e-05	0.170446	0.0702307	0.307563	0.256245	0.0358013	0.0317653	0.102127	0.227559	0.380153	0.0934913	1e-05	1.42205	0.512273	0.354479	0.472131	0.222657	0.363426	0.425939	0.165214	0.352022	0.166199	0.33689	0.0595967	0.150301	0.328763	0.112137	1.17563	0.105972	0.273957	0.0964279	0.0346434	0.282456	0.168791	0.111645	0.16562
INPP5D	1e-05	0.0995531	1e-05	1e-05	1e-05	1e-05	0.0168257	1e-05	1e-05	1e-05	0.00311597	1e-05	1e-05	1e-05	0.0134291	1e-05	0.789199	1e-05	0.321808	1e-05	1e-05	0.230326	1e-05	1e-05	1e-05	0.0199388	0.0221824	1e-05	0.0130497	0.161927	1e-05	1e-05	1e-05	1e-05	1e-05	1e-05	1e-05	1e-05	1e-05	0.0185752	1e-05	1e-05	1.19046	1e-05	1e-05	1e-05	0.0140909	1e-05	1e-05
MITD1	1e-05	1.84909	1.18142	1e-05	1e-05	1.40072	1e-05	1e-05	1e-05	1e-05	1e-05	8.33031	1e-05	1e-05	1e-05	1e-05	0.0917351	1e-05	1e-05	1e-05	1e-05	1e-05	1e-05	1e-05	1e-05	1e-05	1e-05	1e-05	1e-05	1e-05	1e-05	1e-05	1e-05	1e-05	1e-05	1e-05	1e-05	1e-05	1e-05	1e-05	1e-05	1e-05	1e-05	1e-05	4.76289	1e-05	1e-05	1e-05	1e-05
NCLN	1e-05	3.37168	0.639826	0.0336319	1e-05	0.0185541	0.00203586	1e-05	1e-05	0.0928434	1e-05	0.119803	0.0591066	0.181756	0.706787	0.470315	1e-05	1e-05	1e-05	0.155205	0.131318	0.0326799	1e-05	1e-05	0.137699	0.0483845	0.310607	1e-05	1e-05	6.29349	0.172586	1e-05	0.0356572	1e-05	1e-05	1e-05	0.103804	1e-05	1e-05	1e-05	1.67616	1e-05	1e-05	1e-05	8.67658	1e-05	1e-05	0.0856671	0.155522
PAPOLA	1e-05	1.1838	0.640665	1e-05	0.668168	2.91632	1e-05	1e-05	2.48581	1e-05	1e-05	1e-05	1e-05	1.57928	0.501217	1e-05	1e-05	1e-05	1e-05	1e-05	1e-05	1.22265	0.26094	1e-05	2.368	1e-05	0.124954	2.39203	1e-05	1e-05	1e-05	1e-05	0.161313	1e-05	2.0708	1.16124	1e-05	1e-05	1e-05	1e-05	0.0130962	1.97648	1e-05	1e-05	1e-05	1e-05	1e-05	1e-05	1e-05
PAPOLB	1e-05	1.37213	0.742589	1e-05	0.774467	3.38027	1e-05	1e-05	2.88128	1e-05	1e-05	1e-05	1e-05	1.80029	0.580957	1e-05	1e-05	1e-05	1e-05	1e-05	1e-05	1.41717	0.302453	1e-05	2.66326	1e-05	1e-05	2.68983	1e-05	1e-05	1e-05	1e-05	1e-05	1e-05	2.40024	1.34598	1e-05	1e-05	1e-05	1e-05	1e-05	2.29092	1e-05	1e-05	1e-05	1e-05	1e-05	1e-05	1e-05
POR	1e-05	0.0282461	1e-05	0.181767	1e-05	0.277598	0.146076	1e-05	0.106109	0.380679	0.0565982	1e-05	1e-05	1.53209	0.112805	0.0302267	0.139237	0.130982	0.0083187	0.323493	1e-05	1e-05	0.0897447	0.120387	0.0238489	0.0894233	1e-05	1e-05	0.322998	0.0493583	0.17051	1e-05	0.166106	0.223202	1e-05	0.281539	1e-05	0.269036	0.246023	0.265952	0.217361	1e-05	1e-05	1e-05	0.24661	1e-05	1e-05	0.0162384	1e-05
PRX	1e-05	0.125643	1e-05	1e-05	1e-05	1e-05	1e-05	1e-05	0.145481	1e-05	1e-05	1e-05	1e-05	1e-05	1e-05	1e-05	1e-05	1e-05	1e-05	0.0252715	1e-05	1e-05	1e-05	1e-05	1e-05	1e-05	0.0276951	1e-05	1e-05	1e-05	1e-05	1e-05	1e-05	1e-05	1e-05	1e-05	1e-05	1e-05	1e-05	1e-05	0.120096	1e-05	1e-05	0.0276962	1e-05	0.0783358	1e-05	0.266554	1e-05
SIN3A	1e-05	0.639214	1e-05	0.0266323	1e-05	1e-05	1e-05	1e-05	1.62855	1e-05	1e-05	1.93795	0.543283	1e-05	1e-05	1e-05	0.0341304	1e-05	0.366863	1e-05	1e-05	1e-05	1e-05	1e-05	1e-05	1e-05	1e-05	1e-05	1e-05	1e-05	1e-05	0.559749	1e-05	1e-05	1.76657	1e-05	1e-05	1e-05	1e-05	1.62694	1e-05	1e-05	0.824449	0.00792137	2.7594	1e-05	1e-05	1e-05	3.97871
SNRPG	1e-05	0.506203	0.446995	1e-05	1e-05	0.876359	1e-05	0.576297	1.17263	1e-05	1e-05	0.658415	1.36563	1e-05	1e-05	1.30786	1e-05	0.162805	1e-05	1e-05	1e-05	0.547535	0.430237	1.31455	1e-05	1e-05	1.06746	1.22843	1e-05	0.416373	0.89048	1e-05	2.31806	1e-05	1e-05	1e-05	1e-05	0.861448	1e-05	1e-05	1e-05	1e-05	0.222135	0.503316	0.288757	1e-05	0.648033	1e-05	0.160207
SNRPGP15	1e-05	0.404963	0.357596	1e-05	1e-05	0.701087	1e-05	0.461037	0.938105	1e-05	1e-05	0.526732	1.0925	1e-05	1e-05	1.04629	1e-05	0.130244	1e-05	1e-05	1e-05	0.438028	0.34419	1.05164	1e-05	1e-05	0.85397	0.98274	1e-05	0.333098	0.712384	1e-05	1.85445	1e-05	1e-05	1e-05	1e-05	0.689158	1e-05	1e-05	1e-05	1e-05	0.177708	0.402653	0.231006	1e-05	0.518427	1e-05	0.128165
SPTLC2	1e-05	0.0499338	1e-05	1e-05	1e-05	1e-05	1e-05	1e-05	1e-05	1e-05	1e-05	1e-05	1e-05	1e-05	1e-05	1e-05	0.066473	1e-05	0.43	1e-05	1e-05	1e-05	1e-05	1e-05	1e-05	1e-05	1e-05	1e-05	1e-05	1e-05	1e-05	1e-05	1e-05	1e-05	0.295612	1e-05	1e-05	1e-05	1e-05	0.335002	1e-05	1e-05	0.246904	1e-05	1e-05	1e-05	1e-05	1e-05	1e-05
SRP68	1e-05	2.03337	1.13141	1e-05	0.160243	0.464274	0.0481933	0.702589	1e-05	0.255452	0.969003	1.71412	1e-05	0.225416	1e-05	1e-05	0.0741819	0.387332	1.87315	1e-05	0.0212248	1e-05	1.79675	1e-05	1e-05	0.150813	1e-05	1e-05	1e-05	0.0156769	0.0355269	0.938124	1e-05	0.157508	1e-05	1e-05	1.2497	2.00954	0.370182	1e-05	1e-05	1e-05	1.40034	1e-05	0.934203	1e-05	1.78239	0.179692	0.14532
SSU72	1e-05	0.998381	4.12547	1e-05	1e-05	1e-05	1e-05	1e-05	1e-05	1e-05	1e-05	2.59915	1e-05	1e-05	1e-05	1e-05	1e-05	1e-05	1e-05	1e-05	1e-05	1e-05	1e-05	1e-05	1e-05	1e-05	1e-05	1e-05	1e-05	1e-05	1e-05	1e-05	1e-05	0.223246	1e-05	1e-05	1e-05	1e-05	1e-05	1e-05	1e-05	1e-05	1e-05	0.0527938	1.7868	0.0903076	2.48036	1e-05	1e-05
SUPT5H	1e-05	0.0483369	1e-05	1e-05	0.0911307	1e-05	0.118617	1e-05	0.995468	1e-05	0.157209	1e-05	1e-05	1.65192	0.698484	5.45436	1.05775	1e-05	0.405737	1e-05	1e-05	1e-05	1e-05	1e-05	0.0122562	0.672176	0.497999	1e-05	0.769939	3.15229	1e-05	1.37148	1e-05	0.0170967	1.24474	0.0457221	1e-05	1e-05	0.345585	0.324533	1e-05	0.0293389	3.11677	0.184296	0.120094	1e-05	1.31111	0.977471	1e-05
TM9SF3	1e-05	8.06334	1e-05	1e-05	48.8077	1e-05	66.612	1.47638	1e-05	1e-05	1e-05	1e-05	1e-05	1e-05	46.3163	0.0392278	1e-05	1e-05	1e-05	1.52132	1e-05	1e-05	1e-05	1e-05	0.739564	1e-05	1e-05	1.03242	0.0192255	1e-05	1e-05	1e-05	0.0704386	33.0404	1e-05	0.0738309	1e-05	48.7176	1e-05	0.0898136	1e-05	1e-05	37.8334	55.921	1e-05	1e-05	24.7439	1e-05	0.717172
UQCRH	1e-05	0.287259	1e-05	1e-05	1e-05	1e-05	1e-05	1e-05	1e-05	1e-05	1e-05	1e-05	1e-05	1e-05	1e-05	1e-05	8.81501	1e-05	1e-05	22.7555	1e-05	1e-05	1e-05	1e-05	1e-05	1e-05	0.236773	1e-05	0.104385	0.165442	0.256945	1e-05	1e-05	1e-05	1e-05	1e-05	1e-05	1e-05	1e-05	1e-05	0.462687	1e-05	1e-05	1e-05	0.338858	1e-05	1e-05	1e-05	0.124862
VDAC2	1e-05	15.7032	16.1456	1e-05	11.6224	13.7193	0.0483852	14.1903	20.2552	13.3402	31.7346	14.5119	0.350368	22.0185	8.6873	1e-05	1e-05	8.69912	10.2064	7.9827	1e-05	13.3434	19.4649	12.9226	0.107338	21.1072	17.4923	0.0225286	1e-05	15.6301	10.5246	1e-05	10.9077	10.1334	18.5639	17.9312	9.783	12.3373	1e-05	7.1061	14.7502	16.0168	18.6026	0.0373259	5.85009	17.9908	22.6387	0.184017	10.2066
ATG5	1e-05	1e-05	0.0471326	1e-05	1e-05	1e-05	1e-05	1e-05	1e-05	1e-05	1e-05	1e-05	1e-05	1e-05	1e-05	1e-05	1e-05	1e-05	1e-05	1e-05	1e-05	1e-05	0.135511	1e-05	1e-05	1e-05	1e-05	1e-05	1e-05	1e-05	1e-05	1e-05	1e-05	1e-05	1e-05	1e-05	1e-05	1e-05	1e-05	1e-05	1e-05	1e-05	1e-05	1e-05	1e-05	1e-05	1e-05	0.110637	0.0623901
CCDC88A	1e-05	1e-05	0.141062	1e-05	1e-05	1e-05	1e-05	1e-05	1e-05	1e-05	1e-05	1e-05	1e-05	1e-05	1e-05	1e-05	1e-05	1e-05	1e-05	1e-05	1e-05	1e-05	1e-05	1e-05	0.0583713	0.0456204	1e-05	1e-05	1e-05	0.0577014	1e-05	1e-05	1e-05	1e-05	0.0542597	1e-05	0.0494856	1e-05	1e-05	1e-05	1e-05	1e-05	1e-05	1e-05	1e-05	1e-05	1e-05	1e-05	1e-05
DARS2	1e-05	1e-05	0.098646	0.182769	0.122738	0.292165	1e-05	1e-05	1e-05	1e-05	1e-05	1e-05	1e-05	0.0333324	1e-05	0.0341862	1e-05	0.0222373	0.0895694	0.0564691	0.146528	1e-05	1e-05	0.078194	1e-05	0.0502472	0.0745817	1e-05	1e-05	0.0543563	1e-05	1e-05	1e-05	1e-05	1e-05	0.15302	1e-05	1e-05	1e-05	0.0468399	0.123913	1e-05	1e-05	1e-05	0.180862	1e-05	0.221031	1e-05	1e-05
DICER1	1e-05	1e-05	0.458171	1e-05	1e-05	1e-05	1e-05	1e-05	1e-05	0.191077	0.207296	1e-05	0.00980007	0.212857	1e-05	1e-05	0.00335103	1e-05	0.233242	0.131279	1e-05	1e-05	1e-05	1e-05	1e-05	0.253049	1e-05	1e-05	1e-05	1e-05	1e-05	1e-05	0.158949	1e-05	1e-05	1e-05	0.147133	1e-05	0.26059	1e-05	0.376154	1e-05	1e-05	0.0360736	1e-05	0.446161	0.19633	1e-05	1e-05
ELOB	1e-05	1e-05	0.0789148	1e-05	1e-05	1e-05	1e-05	0.101393	1e-05	0.0227458	1e-05	1e-05	1e-05	0.339216	1e-05	1e-05	1e-05	1e-05	0.254002	1e-05	1e-05	1e-05	1e-05	1e-05	1e-05	1e-05	1e-05	1e-05	1e-05	1e-05	1e-05	0.0990174	1e-05	1e-05	1e-05	1e-05	1e-05	1e-05	1.79213	1e-05	1e-05	1e-05	1e-05	1e-05	0.591753	1e-05	1e-05	1e-05	0.8634
ERAP2	1e-05	1e-05	1.84098	1e-05	0.175206	1e-05	0.150534	1e-05	1e-05	1e-05	0.331168	0.263967	1e-05	0.484883	0.327329	0.118044	1e-05	1e-05	1e-05	0.0514145	1e-05	1e-05	1e-05	1e-05	1e-05	1e-05	0.327483	0.110181	0.477097	1e-05	0.064811	0.0896246	0.0141164	0.360869	0.0355079	0.0704327	0.0319395	0.00837298	1e-05	1e-05	0.0430471	0.0109128	1e-05	0.123013	1e-05	1e-05	0.172658	1e-05	0.662014
KIF3A	1e-05	1e-05	0.0473184	1e-05	1e-05	1e-05	1e-05	1e-05	1e-05	1e-05	1e-05	1e-05	1e-05	1e-05	1e-05	1e-05	1e-05	1e-05	1e-05	0.0448863	0.0144386	1e-05	1e-05	1e-05	1e-05	1e-05	1e-05	1e-05	1e-05	1e-05	1e-05	1e-05	1e-05	1e-05	1e-05	0.0251198	1e-05	1e-05	1e-05	1e-05	1e-05	1e-05	1e-05	1e-05	1e-05	1e-05	1e-05	1e-05	1e-05
KYNU	1e-05	1e-05	0.166632	1e-05	0.0676046	1e-05	1e-05	0.559213	1e-05	1.01854	0.0495935	1e-05	1e-05	1e-05	1e-05	1e-05	1e-05	0.202905	1e-05	1e-05	1e-05	1e-05	1e-05	0.0270213	1e-05	0.27915	0.238446	1.00079	1e-05	1e-05	1e-05	1e-05	1e-05	0.209591	0.103258	1e-05	1e-05	1e-05	1e-05	1.33136	1e-05	1.74293	1e-05	0.404006	1e-05	1e-05	0.387242	1e-05	1e-05
LCN1	1e-05	1e-05	0.567989	1e-05	4.94206	0.33457	1.02603	0.850401	5.79357	1e-05	1e-05	1e-05	0.534393	6.07256	2.12967	1e-05	0.339005	2.18032	1e-05	4.66087	1e-05	1e-05	0.395846	5.67039	1e-05	1e-05	2.95813	7.90409	1e-05	0.737968	1e-05	1.90485	2.90952	1e-05	1e-05	4.866	1e-05	1e-05	1.71035	2.30489	3.81547	3.87223	7.3281	1.4789	0.405521	2.39505	5.48796	1e-05	1e-05
MTSS2	1e-05	1e-05	0.0124032	1e-05	0.14137	1e-05	1e-05	1e-05	1e-05	1e-05	1e-05	1e-05	1e-05	1e-05	1e-05	1e-05	1e-05	0.717867	1e-05	0.415981	1e-05	1e-05	1e-05	1e-05	1e-05	1e-05	1e-05	1e-05	1e-05	1e-05	1e-05	1e-05	1e-05	1e-05	1e-05	1e-05	0.0993809	1e-05	1e-05	1e-05	1e-05	1e-05	0.274027	1e-05	1e-05	1e-05	0.270054	1e-05	1e-05
NAAA	1e-05	1e-05	0.0839085	1e-05	1e-05	0.0453445	1e-05	1e-05	1e-05	1e-05	1e-05	0.616337	1e-05	1e-05	1e-05	1e-05	1e-05	1e-05	0.0971938	0.128599	1e-05	1e-05	1e-05	0.448036	1e-05	1e-05	0.422359	1e-05	1e-05	1e-05	1e-05	1e-05	0.2201	1e-05	1e-05	1e-05	0.29516	0.323018	0.0494674	1e-05	1e-05	1e-05	1e-05	1e-05	1e-05	1e-05	0.03215	1e-05	1e-05
NPTN	1e-05	1e-05	0.0557632	0.199832	1e-05	1e-05	1e-05	1e-05	1e-05	1e-05	1e-05	1e-05	0.0965779	1e-05	1e-05	1e-05	0.0751895	1e-05	1e-05	1e-05	1e-05	1e-05	1e-05	1e-05	1e-05	1e-05	1e-05	1e-05	1e-05	1e-05	1e-05	1e-05	1e-05	1e-05	1e-05	1e-05	1e-05	1e-05	1e-05	1e-05	1e-05	0.0564016	1e-05	1e-05	1e-05	1e-05	1e-05	1e-05	1e-05
ORC5	1e-05	1e-05	0.494909	1e-05	1e-05	1e-05	1e-05	1e-05	1e-05	1e-05	1e-05	1e-05	1.915	1e-05	1e-05	1e-05	1e-05	1e-05	1e-05	0.243868	1e-05	1e-05	1e-05	1e-05	1e-05	0.122382	1e-05	1e-05	1e-05	1e-05	1e-05	1e-05	0.0554273	1e-05	1e-05	1e-05	1e-05	0.112073	2.45523	1e-05	1e-05	1e-05	0.277651	1e-05	1e-05	1e-05	1e-05	0.768384	1e-05
RAB1A	1e-05	1e-05	0.0254313	7.59722	0.0786995	1e-05	0.0572584	1e-05	0.19103	94.2708	1e-05	1e-05	4.89112	68.9894	0.0346237	0.383298	1e-05	83.6839	1e-05	24.598	1e-05	1e-05	5.29824	1e-05	49.4372	102.807	1e-05	118.999	0.00357485	3.73832	1e-05	0.383245	1e-05	0.0384409	1.00046	1e-05	1e-05	1e-05	0.144169	0.0378437	80.2131	105.028	1e-05	72.8304	0.0522585	0.180256	0.0833741	9.80166	5.1042
STT3B	1e-05	1e-05	0.0276049	1e-05	0.0168378	1.13985	1e-05	1e-05	1e-05	1e-05	1e-05	1e-05	1.33175	1e-05	0.123847	2.28901	1e-05	1e-05	1e-05	0.00777309	0.211786	1e-05	1e-05	1e-05	1e-05	2.16308	1e-05	1e-05	1e-05	1e-05	1e-05	0.0771497	1e-05	1e-05	0.979701	1e-05	1e-05	0.0174951	0.177602	1e-05	0.608542	1e-05	1e-05	1e-05	1e-05	1e-05	1e-05	1e-05	1.85791
TRA2A	1e-05	1e-05	0.0258879	0.0568875	1e-05	1e-05	1e-05	1e-05	1e-05	1e-05	1e-05	1e-05	0.058444	1e-05	1e-05	1e-05	1e-05	0.599943	1e-05	1e-05	1e-05	1e-05	1e-05	0.0817388	0.0424436	0.53543	0.0300821	1e-05	1e-05	1e-05	1e-05	0.26059	0.0866532	0.00551022	1e-05	1e-05	1e-05	1e-05	1e-05	1e-05	1e-05	0.0141601	1e-05	1e-05	1e-05	1e-05	1e-05	1e-05	1e-05
VAMP8	1e-05	1e-05	1.51464	0.344432	14.6397	1e-05	1e-05	1e-05	1e-05	3.12219	37.0807	15.9449	19.9686	1e-05	110.152	0.19448	62.9414	0.177522	1e-05	1.48504	1e-05	1e-05	1.13429	41.6921	2.95275	1e-05	1e-05	1e-05	1e-05	3.13317	2.34321	82.3797	123.276	1e-05	91.2635	58.9927	1e-05	1e-05	0.573062	148.453	0.331282	1e-05	46.1796	1e-05	1.7808	1e-05	15.5648	65.305	1e-05
A1CF	1e-05	1e-05	1e-05	0.673484	1e-05	1e-05	1e-05	1e-05	1e-05	1e-05	0.443793	1e-05	1e-05	1e-05	0.402968	1e-05	1e-05	1e-05	1e-05	1e-05	1e-05	1e-05	1e-05	1e-05	1e-05	1e-05	1e-05	1e-05	1e-05	1e-05	1e-05	1e-05	1e-05	1e-05	0.986614	1e-05	1e-05	1e-05	0.699358	0.488582	1e-05	1e-05	0.161394	1e-05	1e-05	0.494448	1e-05	0.969346	1e-05
CDK5	1e-05	1e-05	1e-05	0.230548	1e-05	1e-05	1e-05	1.21206	1e-05	1e-05	1e-05	0.0452032	1e-05	1e-05	1e-05	1e-05	1e-05	1e-05	1e-05	1e-05	1e-05	1.13032	1e-05	1e-05	1e-05	0.0318971	0.0321612	1e-05	1e-05	1.51024	1e-05	1e-05	1e-05	1e-05	1e-05	0.00230139	1e-05	1e-05	1e-05	0.256164	1e-05	1e-05	1e-05	1e-05	2.01939	1e-05	1e-05	0.0913624	1e-05
CPPED1	1e-05	1e-05	1e-05	0.265428	1e-05	1e-05	1e-05	0.0923953	1e-05	1e-05	1e-05	0.183416	0.156772	1e-05	1e-05	0.205497	1e-05	1e-05	1e-05	1e-05	1e-05	0.0664979	1e-05	1e-05	1e-05	1e-05	1e-05	0.820235	1e-05	1.38574	1e-05	0.0112355	1e-05	0.0300861	0.200558	1e-05	1e-05	1e-05	0.00578773	0.63843	1e-05	1e-05	1e-05	0.164022	1.59253	1e-05	0.919681	0.287349	2.48118
CYB5A	1e-05	1e-05	1e-05	2.41978	3.1421	1e-05	1e-05	4.82476	0.348832	1e-05	2.27427	0.498764	1e-05	11.542	2.30557	0.0801699	10.9474	4.55789	1e-05	0.12983	1.19653	1e-05	1e-05	0.251247	7.54063	1e-05	1e-05	0.32529	1e-05	5.44642	1e-05	0.0480553	1e-05	4.56203	1e-05	0.235707	6.48882	1.05192	1e-05	0.161248	1e-05	1.58654	1e-05	1e-05	1e-05	2.48452	11.2718	1e-05	2.69469
DDX24	1e-05	1e-05	1e-05	0.275233	1e-05	0.154359	1e-05	1e-05	1e-05	1e-05	1e-05	1e-05	1e-05	1e-05	1e-05	1e-05	1e-05	1e-05	1e-05	1e-05	1e-05	1e-05	1e-05	1e-05	0.0948254	1e-05	1e-05	1e-05	1e-05	1e-05	0.242101	1e-05	1e-05	1e-05	1e-05	1e-05	1e-05	1e-05	1e-05	1e-05	1e-05	1e-05	1e-05	1e-05	0.0177723	1e-05	1e-05	1e-05	0.0532536
FAM3D	1e-05	1e-05	1e-05	0.189001	0.175492	1e-05	1e-05	1e-05	1e-05	1e-05	0.0978032	1e-05	1e-05	0.180178	1e-05	1e-05	1e-05	1e-05	1e-05	1e-05	1e-05	1e-05	1e-05	1e-05	1e-05	1e-05	1e-05	1e-05	1e-05	1e-05	1e-05	1e-05	1e-05	1e-05	0.156606	0.287378	1e-05	1e-05	1e-05	1e-05	1e-05	1e-05	1e-05	1e-05	1e-05	1e-05	1e-05	1e-05	1e-05
IGKV6D-21	1e-05	1e-05	1e-05	0.593954	1e-05	1e-05	0.948146	1e-05	1e-05	0.544517	1e-05	1e-05	1e-05	1e-05	1e-05	1e-05	1e-05	1e-05	1e-05	0.683439	1e-05	1e-05	1e-05	1e-05	1e-05	1e-05	1e-05	1e-05	1e-05	1e-05	1e-05	1e-05	1e-05	1e-05	1e-05	0.112782	1e-05	0.182532	1e-05	1e-05	0.216223	1e-05	1e-05	1e-05	1e-05	0.190748	1e-05	1e-05	1e-05
IGKV6D-41	1e-05	1e-05	1e-05	0.593954	1e-05	1e-05	0.948146	1e-05	1e-05	0.544517	1e-05	1e-05	1e-05	1e-05	1e-05	1e-05	1e-05	1e-05	1e-05	0.683439	1e-05	1e-05	1e-05	1e-05	1e-05	1e-05	1e-05	1e-05	1e-05	1e-05	1e-05	1e-05	1e-05	1e-05	1e-05	0.112782	1e-05	0.182532	1e-05	1e-05	0.216223	1e-05	1e-05	1e-05	1e-05	0.190748	1e-05	1e-05	1e-05
INTS7	1e-05	1e-05	1e-05	0.0217901	1e-05	1e-05	1e-05	0.0189493	1e-05	1e-05	1e-05	1e-05	1e-05	1e-05	1e-05	1e-05	1e-05	1e-05	0.166511	12.7866	1e-05	1e-05	1e-05	1e-05	0.0858643	1e-05	0.0239418	1e-05	1e-05	6.9862	1e-05	1e-05	1e-05	1e-05	0.0678197	1e-05	1e-05	1e-05	11.1298	1e-05	6.63217	1e-05	1e-05	1e-05	1e-05	1e-05	1e-05	1e-05	1e-05
ITGA2	1e-05	1e-05	1e-05	0.0134086	1e-05	1e-05	1e-05	1.22629	1e-05	1e-05	1e-05	0.569861	1e-05	1e-05	1e-05	1.12664	1e-05	1e-05	1e-05	0.0175066	0.492313	1e-05	1e-05	1e-05	1e-05	1e-05	1e-05	1e-05	0.0387373	1.37068	1e-05	0.646855	1e-05	1e-05	0.183616	1e-05	1e-05	1e-05	1e-05	0.126223	1e-05	0.0107697	1e-05	1e-05	1e-05	1e-05	0.0200268	1e-05	1.66968
MRPL17	1e-05	1e-05	1e-05	5.26758	2.36367	0.338846	4.5462	1e-05	4.39706	4.09139	2.24561	1e-05	1.13444	1e-05	1e-05	1e-05	6.01977	3.61154	3.88956	4.53189	1e-05	1e-05	1e-05	2.1221	2.61529	2.82466	4.59006	3.79235	1e-05	1e-05	1e-05	1e-05	3.23162	1e-05	4.34613	2.79024	6.64853	5.17238	7.93434	4.82494	4.37047	0.957216	5.08187	6.0987	1e-05	1e-05	2.50603	10.884	1e-05
PRTN3	1e-05	1e-05	1e-05	0.875564	1e-05	1.05157	1e-05	1e-05	2.6528	1e-05	0.709881	1e-05	1e-05	1e-05	0.304476	0.625972	0.284831	0.185623	1e-05	1e-05	1.90518	1e-05	0.300464	1e-05	1e-05	1e-05	1.54535	1e-05	2.76397	4.24981	1e-05	1e-05	0.69787	0.730821	1e-05	1e-05	2.09131	0.443068	1e-05	0.0637569	2.83534	1.41859	0.845643	1e-05	0.393563	1e-05	1e-05	0.148955	6.00674
SETSIP	1e-05	1e-05	1e-05	0.0126586	1e-05	1e-05	1e-05	1e-05	0.140787	1e-05	1e-05	1e-05	0.0119038	1e-05	1e-05	1e-05	1e-05	1e-05	1e-05	1e-05	1e-05	1e-05	1e-05	1e-05	1e-05	1e-05	0.036868	1e-05	1e-05	0.0471567	1e-05	1e-05	1e-05	1e-05	0.0424691	1e-05	1e-05	1e-05	0.00729681	0.0311082	0.0209465	1e-05	1e-05	1e-05	1e-05	1e-05	1e-05	1e-05	0.0782208
SLC27A1	1e-05	1e-05	1e-05	0.717449	1e-05	1e-05	1e-05	1e-05	1e-05	1e-05	1e-05	1e-05	1e-05	1e-05	1e-05	1e-05	1e-05	1e-05	0.146938	0.0769449	1e-05	1e-05	0.490034	1e-05	1e-05	1e-05	0.296936	1e-05	1e-05	1e-05	1e-05	1e-05	0.0150514	1e-05	1e-05	0.0608263	1e-05	1e-05	1e-05	1e-05	1e-05	1e-05	1e-05	1e-05	1e-05	1e-05	1e-05	0.078372	1e-05
STRIP1	1e-05	1e-05	1e-05	0.341227	1e-05	1e-05	0.907692	1e-05	0.0140533	1e-05	1e-05	1e-05	1e-05	1e-05	1e-05	1e-05	1e-05	1e-05	1e-05	1e-05	1e-05	1e-05	1e-05	1e-05	1e-05	1e-05	0.460529	1e-05	1e-05	1e-05	1e-05	1e-05	1e-05	1e-05	1e-05	1e-05	0.0777673	1e-05	1e-05	1e-05	1e-05	1e-05	1e-05	0.12653	1e-05	1e-05	1e-05	0.481811	1e-05
TRIM47	1e-05	1e-05	1e-05	1.46288	1e-05	1e-05	1e-05	0.0237179	1e-05	1e-05	1e-05	1e-05	1e-05	0.431319	1e-05	1e-05	1e-05	0.303207	1e-05	1e-05	1e-05	1e-05	0.311842	0.322077	1e-05	1e-05	1e-05	1.14291	1e-05	1e-05	1e-05	1e-05	1e-05	1e-05	1e-05	1e-05	1e-05	1e-05	1e-05	0.00507126	1e-05	1e-05	1e-05	1e-05	1e-05	1e-05	0.863013	1e-05	1e-05
UBE2R2	1e-05	1e-05	1e-05	3.29173	1e-05	1e-05	1e-05	1.12455	1e-05	1e-05	1e-05	1e-05	1e-05	1e-05	0.154372	1.94048	1e-05	1e-05	1e-05	1e-05	2.21807	1e-05	1e-05	1e-05	1e-05	1e-05	1e-05	1e-05	11.84	1e-05	1e-05	1e-05	1e-05	1e-05	0.0422206	1e-05	1e-05	1e-05	1e-05	1e-05	1e-05	1e-05	1e-05	1e-05	1e-05	1e-05	1e-05	2.71727	1e-05
VPS53	1e-05	1e-05	1e-05	0.0626824	0.0515019	1e-05	1e-05	0.428828	1e-05	1e-05	0.218803	1e-05	1e-05	0.010696	1e-05	0.0369886	1e-05	1e-05	1e-05	1e-05	0.0305968	1e-05	0.154554	1e-05	1e-05	1e-05	1e-05	1e-05	1e-05	0.0785974	1e-05	1e-05	0.0537733	1e-05	1e-05	1e-05	1e-05	1e-05	0.0347126	1e-05	0.304663	1e-05	1e-05	1e-05	0.381278	1e-05	1e-05	0.0146451	1e-05
ARPC3	1e-05	1e-05	1e-05	1e-05	0.0907296	1e-05	3.47789	4.53388	0.255713	1e-05	1e-05	0.351716	1e-05	1e-05	1e-05	1e-05	0.174358	1e-05	1e-05	0.201628	1e-05	1e-05	1e-05	1e-05	1e-05	0.31613	1e-05	1e-05	1e-05	1e-05	0.0554356	1e-05	1e-05	0.120563	0.518293	0.213079	0.138651	1e-05	1.03436	1e-05	0.96399	1e-05	1e-05	0.05032	0.530812	1e-05	1e-05	2.86656	1.28115
BCAS2	1e-05	1e-05	1e-05	1e-05	1.30645	0.183503	1e-05	0.0413482	1.59743	1.78119	1.98935	1e-05	1e-05	1e-05	1e-05	1e-05	2.87327	1e-05	1e-05	3.81486	1e-05	3.66252	1e-05	1e-05	1.77706	1e-05	8.76433	1.11818	1.55648	1e-05	1e-05	2.86138	1e-05	10.3033	1e-05	7.25023	1e-05	4.99343	1e-05	0.0431043	1e-05	1.60167	1.47761	2.10493	1e-05	4.9086	1e-05	1e-05	1e-05
BRD3	1e-05	1e-05	1e-05	1e-05	0.015329	1e-05	1e-05	1e-05	1e-05	1e-05	1e-05	1e-05	1e-05	1e-05	0.0277487	1e-05	1e-05	1e-05	1e-05	1e-05	1e-05	1e-05	1e-05	1e-05	1e-05	1e-05	1e-05	1e-05	0.0434179	1e-05	1e-05	0.0347963	1e-05	1e-05	1e-05	0.00655709	1e-05	1e-05	1e-05	0.0112215	1e-05	1e-05	1e-05	1e-05	1e-05	1e-05	1e-05	1e-05	1e-05
BYSL	1e-05	1e-05	1e-05	1e-05	0.115647	1e-05	0.336051	1e-05	0.150366	0.0561566	1e-05	1e-05	1e-05	1e-05	0.534739	1e-05	0.368489	0.260898	0.104133	0.139241	0.0249082	1e-05	0.301566	0.0985046	1e-05	1e-05	1e-05	1e-05	1e-05	1.42847	0.238107	0.124266	1e-05	0.102408	1e-05	1e-05	0.0765216	1e-05	1e-05	1e-05	1e-05	1e-05	1e-05	1e-05	1.25061	1e-05	1e-05	1e-05	1e-05
CARD9	1e-05	1e-05	1e-05	1e-05	0.391507	1e-05	1e-05	1e-05	1e-05	1e-05	1e-05	1e-05	1e-05	1e-05	1e-05	1e-05	1e-05	1e-05	1e-05	1e-05	1e-05	1e-05	1e-05	1e-05	1e-05	1e-05	1e-05	1e-05	1e-05	0.518978	1e-05	1e-05	1e-05	1e-05	1e-05	1e-05	1e-05	1e-05	1e-05	1e-05	1e-05	1e-05	1e-05	1e-05	0.281618	1e-05	0.432391	1e-05	1e-05
DHRS4	1e-05	1e-05	1e-05	1e-05	2.56918	1e-05	1e-05	1e-05	1.2544	1e-05	2.21396	1e-05	1e-05	1e-05	1e-05	0.667073	0.138295	1e-05	1e-05	1e-05	1e-05	1e-05	1e-05	1e-05	1e-05	1e-05	1e-05	1e-05	1.36474	1e-05	1e-05	1e-05	1e-05	1e-05	3.54155	0.855348	1e-05	1e-05	3.49884	1.20072	1e-05	0.305367	4.81487	1e-05	1e-05	1e-05	2.46181	1e-05	0.513158
ELP4	1e-05	1e-05	1e-05	1e-05	0.535868	1e-05	1e-05	1e-05	1e-05	1e-05	1e-05	1e-05	1e-05	1e-05	1e-05	1e-05	1e-05	1e-05	1e-05	1e-05	1e-05	1e-05	1e-05	1e-05	1e-05	1e-05	1e-05	1e-05	1e-05	1e-05	1e-05	1e-05	1e-05	1e-05	1e-05	1e-05	1e-05	1e-05	1e-05	1e-05	1e-05	1e-05	1e-05	1e-05	1e-05	1e-05	0.504371	1e-05	1e-05
GPX2	1e-05	1e-05	1e-05	1e-05	26.0057	0.430213	1e-05	1e-05	1e-05	1e-05	1e-05	1e-05	1e-05	1e-05	34.8708	0.656149	1e-05	2.8775	13.5693	1e-05	1e-05	1e-05	1e-05	1e-05	1.28323	1e-05	1e-05	1e-05	1e-05	1e-05	1e-05	19.8923	0.1883	1e-05	1e-05	1e-05	1e-05	1e-05	1e-05	5.33192	1e-05	1e-05	1e-05	1e-05	1.41554	0.843648	0.554757	1e-05	1e-05
HLA-DPB1	1e-05	1e-05	1e-05	1e-05	14.2441	1e-05	14.9262	1e-05	1e-05	6.28217	1e-05	1e-05	1e-05	1e-05	1e-05	1e-05	1e-05	1e-05	1e-05	1e-05	1e-05	1e-05	1e-05	1e-05	1e-05	1e-05	1e-05	3.75273	1e-05	1e-05	1e-05	1e-05	1e-05	1e-05	1e-05	1e-05	1e-05	5.71583	1e-05	1e-05	1e-05	1e-05	1e-05	8.92013	1e-05	1e-05	1e-05	1e-05	1e-05
KANK4	1e-05	1e-05	1e-05	1e-05	0.748034	1e-05	1e-05	1e-05	1e-05	1e-05	0.711107	1e-05	1e-05	1e-05	1e-05	1e-05	1e-05	1e-05	1e-05	1e-05	1e-05	1e-05	1e-05	1e-05	1e-05	1e-05	1e-05	1e-05	0.432292	1e-05	1e-05	1e-05	1e-05	1e-05	1.07914	0.420718	1e-05	1e-05	1e-05	0.361963	1e-05	1e-05	1e-05	1e-05	1e-05	1e-05	1e-05	1e-05	0.136028
NUDCD3	1e-05	1e-05	1e-05	1e-05	0.629008	1e-05	0.683059	1e-05	1e-05	1e-05	0.863952	1e-05	1e-05	1.8195	1e-05	1e-05	1e-05	1e-05	1e-05	0.0409037	1e-05	1e-05	1e-05	1.07723	1e-05	1e-05	1e-05	1e-05	0.501504	1e-05	1e-05	1e-05	1e-05	1e-05	0.162987	1e-05	1e-05	1e-05	1e-05	1e-05	1e-05	1e-05	1e-05	1e-05	1e-05	1e-05	1e-05	1e-05	1e-05
PGA3	1e-05	1e-05	1e-05	1e-05	0.294319	1e-05	0.734186	1e-05	0.477094	1e-05	1e-05	1.17857	1e-05	1e-05	0.268085	0.109072	1e-05	1e-05	0.197571	0.63423	1e-05	1e-05	1e-05	1e-05	1e-05	1e-05	1e-05	0.19573	1e-05	1.95154	1e-05	1e-05	1e-05	0.803361	1e-05	1e-05	1e-05	0.29296	1e-05	1e-05	0.0423852	1e-05	0.589456	1e-05	1e-05	1e-05	0.335944	1e-05	1e-05
PGA4	1e-05	1e-05	1e-05	1e-05	0.343372	1e-05	0.85655	1e-05	0.556609	1e-05	1e-05	1.375	1e-05	1e-05	0.312766	0.12725	1e-05	1e-05	0.230499	0.739935	1e-05	1e-05	1e-05	1e-05	1e-05	1e-05	1e-05	0.228351	1e-05	2.2768	1e-05	1e-05	1e-05	0.937254	1e-05	1e-05	1e-05	0.341787	1e-05	1e-05	0.0494494	1e-05	0.687699	1e-05	1e-05	1e-05	0.391935	1e-05	1e-05
PGA5	1e-05	1e-05	1e-05	1e-05	0.294319	1e-05	0.734186	1e-05	0.477094	1e-05	1e-05	1.17857	1e-05	1e-05	0.268085	0.109072	1e-05	1e-05	0.197571	0.63423	1e-05	1e-05	1e-05	1e-05	1e-05	1e-05	1e-05	0.19573	1e-05	1.95154	1e-05	1e-05	1e-05	0.803361	1e-05	1e-05	1e-05	0.29296	1e-05	1e-05	0.0423852	1e-05	0.589456	1e-05	1e-05	1e-05	0.335944	1e-05	1e-05
PTK7	1e-05	1e-05	1e-05	1e-05	0.198424	1e-05	1e-05	1e-05	1e-05	0.153562	1e-05	1e-05	1e-05	1e-05	1e-05	1e-05	0.0326449	0.128124	1e-05	0.196293	1e-05	0.00889127	0.0102237	1e-05	1e-05	0.381047	1e-05	1e-05	1e-05	1e-05	0.742606	1e-05	0.0442917	1e-05	1e-05	1e-05	0.0955556	0.088284	1e-05	0.0298662	1e-05	1e-05	1e-05	1e-05	0.0208001	1e-05	1e-05	0.0215629	0.0182515
RAB11B	1e-05	1e-05	1e-05	1e-05	0.544032	1e-05	1e-05	1e-05	2.12023	1e-05	1e-05	1e-05	1e-05	1e-05	1e-05	0.0998822	1e-05	0.0555283	1e-05	0.660339	1e-05	1e-05	1e-05	0.254795	1e-05	0.00554131	0.00278099	1e-05	1e-05	1.73717	1e-05	0.335632	1e-05	0.0108065	0.936382	1e-05	1e-05	1e-05	1e-05	0.00648661	2.16429	3.96907	1e-05	1e-05	1e-05	1e-05	1e-05	1e-05	1e-05
RAVER1	1e-05	1e-05	1e-05	1e-05	0.118816	1e-05	0.617492	0.137939	1e-05	1e-05	0.676223	1e-05	1e-05	1e-05	0.0247273	1e-05	1e-05	1e-05	0.128663	1e-05	1e-05	1e-05	1e-05	1e-05	1e-05	0.00789443	1e-05	1e-05	2.56248	0.0858195	1e-05	1e-05	1e-05	0.909659	1e-05	1e-05	1e-05	1e-05	1e-05	1e-05	0.847227	2.78773	1e-05	1e-05	1e-05	1e-05	1e-05	1e-05	0.291574
RBMXL3	1e-05	1e-05	1e-05	1e-05	0.00491672	1e-05	1e-05	1e-05	1e-05	1e-05	1e-05	1e-05	1e-05	1e-05	1e-05	1e-05	1e-05	1e-05	1e-05	1e-05	0.00767405	1e-05	1e-05	1e-05	1e-05	1e-05	1e-05	1e-05	1e-05	1e-05	1e-05	1e-05	1e-05	1e-05	1e-05	0.00389883	0.00319127	1e-05	1e-05	1e-05	1e-05	1e-05	1e-05	1e-05	1e-05	1e-05	1e-05	1e-05	1e-05
RPS6KA4	1e-05	1e-05	1e-05	1e-05	0.0320464	1e-05	1e-05	1e-05	1e-05	1e-05	1e-05	1e-05	1e-05	1e-05	1e-05	0.0424427	1e-05	1e-05	1e-05	1e-05	0.0913938	1e-05	1e-05	1e-05	0.0154137	1e-05	1e-05	1e-05	1e-05	0.151137	1e-05	1e-05	1e-05	1e-05	0.0157738	1e-05	1e-05	1e-05	1e-05	1e-05	1e-05	1e-05	1e-05	1e-05	1e-05	1e-05	1e-05	0.111351	1e-05
SLC12A3	1e-05	1e-05	1e-05	1e-05	6.70613	1e-05	1e-05	1e-05	1e-05	1e-05	1e-05	1e-05	7.84518	1e-05	1e-05	1e-05	1e-05	1e-05	1e-05	1e-05	8.27189	1e-05	1e-05	1e-05	1e-05	1e-05	1e-05	1e-05	1e-05	1e-05	1e-05	1e-05	1e-05	1e-05	1e-05	1e-05	1e-05	1e-05	1e-05	1e-05	1e-05	1e-05	1e-05	1e-05	1e-05	1e-05	1e-05	1e-05	11.387
WDR37	1e-05	1e-05	1e-05	1e-05	0.0564	0.0790011	1e-05	0.10369	1e-05	1e-05	1e-05	1e-05	1e-05	1e-05	1e-05	1e-05	1e-05	1e-05	1e-05	1e-05	0.0185276	1e-05	1e-05	1e-05	1e-05	0.160696	1e-05	1e-05	1e-05	1e-05	1e-05	1e-05	1e-05	1e-05	1e-05	1e-05	1e-05	1e-05	1e-05	1e-05	0.292061	1e-05	1e-05	1e-05	1e-05	1e-05	1e-05	1e-05	1e-05
ATP6V1G1	1e-05	1e-05	1e-05	1e-05	1e-05	0.357719	1e-05	1e-05	1e-05	1e-05	1e-05	1e-05	1e-05	1e-05	1e-05	1e-05	1e-05	1e-05	1e-05	0.600494	1e-05	0.892876	1e-05	1e-05	0.975558	0.747299	1e-05	1e-05	1e-05	1e-05	1e-05	1e-05	1e-05	1e-05	1e-05	1e-05	1e-05	1e-05	1e-05	1e-05	1e-05	1e-05	1e-05	1e-05	0.309779	1e-05	1e-05	1e-05	1e-05
GAP43	1e-05	1e-05	1e-05	1e-05	1e-05	0.133206	0.0723196	1e-05	1e-05	1e-05	1e-05	1e-05	1e-05	1e-05	1e-05	1e-05	1e-05	0.0597236	1e-05	1e-05	0.125214	1e-05	1e-05	1e-05	1e-05	1e-05	0.59852	1e-05	1e-05	1e-05	1e-05	0.0640728	1e-05	1e-05	0.463573	1e-05	1e-05	1e-05	1e-05	1e-05	1e-05	1e-05	1e-05	0.0100481	1e-05	1e-05	1e-05	1e-05	1e-05
HPCA	1e-05	1e-05	1e-05	1e-05	1e-05	7.53307	1e-05	1e-05	1e-05	1e-05	1e-05	1e-05	1e-05	1e-05	2.5712	1e-05	1e-05	1e-05	1e-05	1e-05	6.979	12.0504	1e-05	1e-05	1e-05	1e-05	1e-05	1e-05	0.0832031	4.39309	1e-05	1e-05	0.329535	1e-05	1e-05	1e-05	1e-05	1e-05	1e-05	4.59558	1e-05	1e-05	1.28006	1e-05	6.20978	1e-05	1e-05	1e-05	1e-05
SUGP2	1e-05	1e-05	1e-05	1e-05	1e-05	0.018064	1e-05	1e-05	7.28078	2.04995	1e-05	1e-05	1e-05	5.25061	1e-05	1e-05	1e-05	1e-05	0.0208798	1e-05	1e-05	1e-05	1e-05	1e-05	1e-05	1e-05	6.07102	1e-05	0.540587	1e-05	1e-05	1e-05	1e-05	1e-05	11.9053	1e-05	1e-05	1e-05	1e-05	0.0256726	5.42898	1e-05	1e-05	0.0244627	1e-05	1e-05	1e-05	1e-05	1e-05
CBFB	1e-05	1e-05	1e-05	1e-05	1e-05	1e-05	0.454222	1e-05	1e-05	1e-05	0.0641863	1e-05	1e-05	1e-05	1e-05	1e-05	1e-05	1.76181	1e-05	0.397498	1e-05	1e-05	1e-05	1e-05	1e-05	1e-05	1e-05	1e-05	0.376191	1e-05	0.118477	1e-05	1e-05	1e-05	1.17899	1e-05	1e-05	1e-05	1e-05	1e-05	1e-05	0.036019	1e-05	1e-05	0.222401	1e-05	1e-05	1e-05	1e-05
CMTR1	1e-05	1e-05	1e-05	1e-05	1e-05	1e-05	0.0306582	1e-05	0.0135868	1e-05	1e-05	1e-05	1e-05	0.17875	0.416234	0.225105	1e-05	1e-05	1e-05	0.952503	0.334199	1e-05	1e-05	0.164821	1e-05	1e-05	0.426239	1e-05	1e-05	1e-05	1e-05	1e-05	1e-05	1e-05	2.11637	1e-05	1e-05	1e-05	1e-05	1e-05	1e-05	1e-05	0.770224	0.558707	0.0233518	1e-05	0.91913	1e-05	1e-05
ECHDC3	1e-05	1e-05	1e-05	1e-05	1e-05	1e-05	0.29225	1e-05	0.930021	1e-05	0.455037	1e-05	1e-05	1e-05	0.371479	1e-05	1e-05	0.292886	1e-05	1e-05	1e-05	1e-05	1e-05	1e-05	1e-05	0.770562	0.410947	0.328297	1e-05	1e-05	1e-05	1e-05	0.631168	0.473861	0.940991	0.423412	1e-05	1.78604	0.503448	0.774804	0.480718	1e-05	0.332869	1e-05	1e-05	0.567256	1.63736	1e-05	1e-05
FIP1L1	1e-05	1e-05	1e-05	1e-05	1e-05	1e-05	0.124357	1e-05	1.03342	1e-05	2.53819	1e-05	1e-05	0.431978	1.27726	1e-05	1e-05	0.593751	1e-05	1e-05	1e-05	1e-05	1e-05	0.181893	1e-05	2.60152	1e-05	1e-05	1e-05	1e-05	1e-05	2.3416	1e-05	0.112548	1.21772	1e-05	0.380106	1e-05	1.13522	1e-05	1e-05	1e-05	1e-05	1e-05	1e-05	0.920415	1.06083	1e-05	1e-05
FOXK1	1e-05	1e-05	1e-05	1e-05	1e-05	1e-05	0.315319	1e-05	1e-05	1e-05	1e-05	0.0390478	1e-05	1e-05	0.246233	1e-05	0.22758	0.270935	1e-05	1e-05	1e-05	1e-05	1e-05	1e-05	1e-05	0.516069	1e-05	1e-05	1e-05	0.505047	0.0161141	0.278534	1e-05	1e-05	1e-05	1e-05	0.247366	1e-05	0.0966396	0.155717	1e-05	0.693883	0.322803	1e-05	1e-05	1e-05	0.428241	1e-05	1e-05
G3BP2	1e-05	1e-05	1e-05	1e-05	1e-05	1e-05	0.0214286	1e-05	1e-05	0.126771	1e-05	1e-05	1e-05	1e-05	0.382496	1e-05	0.0260537	0.0173749	1e-05	1e-05	1e-05	1e-05	1e-05	1e-05	1e-05	1e-05	1e-05	1e-05	1e-05	1e-05	1e-05	1e-05	1e-05	1e-05	1e-05	0.0218454	0.178222	1e-05	1e-05	1e-05	1e-05	1e-05	0.122411	0.0583204	1e-05	1e-05	1e-05	1e-05	1e-05
HLA-DOB	1e-05	1e-05	1e-05	1e-05	1e-05	1e-05	3.44993	1e-05	1e-05	1e-05	1e-05	1e-05	1e-05	1e-05	21.6178	1e-05	21.335	1e-05	1e-05	1e-05	1e-05	1e-05	1e-05	1e-05	1e-05	1e-05	1e-05	1e-05	1e-05	1e-05	1e-05	1e-05	1e-05	5.46929	1e-05	1e-05	1e-05	1e-05	1e-05	1e-05	1e-05	1e-05	1e-05	28.0918	1e-05	1e-05	1e-05	1e-05	1e-05
LAGE3	1e-05	1e-05	1e-05	1e-05	1e-05	1e-05	7.99624	1e-05	1e-05	1e-05	24.5574	1e-05	1e-05	1e-05	1e-05	1e-05	1e-05	1e-05	1e-05	1e-05	1e-05	1e-05	1e-05	1e-05	1e-05	1e-05	1e-05	1e-05	1e-05	1e-05	1e-05	1e-05	1e-05	11.6423	1e-05	7.98388	1e-05	1e-05	1e-05	1e-05	1e-05	1e-05	1e-05	1e-05	1e-05	1e-05	1e-05	1e-05	1e-05
NAPG	1e-05	1e-05	1e-05	1e-05	1e-05	1e-05	0.179025	1e-05	1e-05	1e-05	1e-05	1e-05	1e-05	1e-05	1e-05	1e-05	1e-05	1e-05	1e-05	1e-05	1e-05	1e-05	1e-05	1e-05	1e-05	1e-05	1e-05	1e-05	0.210762	1e-05	1e-05	1e-05	1e-05	1e-05	1e-05	1e-05	1e-05	1e-05	1e-05	0.0907335	1e-05	1e-05	1e-05	1e-05	1e-05	1e-05	0.0336337	1e-05	1e-05
NOL3	1e-05	1e-05	1e-05	1e-05	1e-05	1e-05	0.142419	1e-05	1e-05	1e-05	0.106804	1e-05	1e-05	1e-05	1e-05	1e-05	1e-05	1e-05	1e-05	1e-05	1e-05	1e-05	1e-05	1e-05	1e-05	1e-05	1e-05	1e-05	1e-05	1e-05	1e-05	1e-05	1e-05	1e-05	1e-05	1e-05	1e-05	1e-05	1e-05	1e-05	0.146427	0.239896	0.161842	1e-05	1e-05	1e-05	1e-05	1e-05	1e-05
USP15	1e-05	1e-05	1e-05	1e-05	1e-05	1e-05	5.88126	1e-05	1e-05	1e-05	4.11561	0.0218703	0.012984	1e-05	0.936144	1e-05	10.3038	1e-05	5.69076	0.0557972	1e-05	0.00416793	1e-05	0.0065039	0.0169851	0.0357829	1e-05	1e-05	1e-05	0.304469	1e-05	0.0750848	1e-05	1e-05	1e-05	5.38911	0.00517289	1e-05	1e-05	5.54057	5.62511	1e-05	1e-05	0.00387503	0.131173	4.80051	0.0339614	1e-05	1e-05
ADAM15	1e-05	1e-05	1e-05	1e-05	1e-05	1e-05	1e-05	5.54137	1e-05	1e-05	1e-05	1e-05	1e-05	1e-05	1e-05	5.6588	0.662681	1.90695	1e-05	1e-05	1e-05	1e-05	1e-05	1e-05	1e-05	1e-05	1e-05	1e-05	1e-05	1e-05	1e-05	1e-05	1e-05	1e-05	1e-05	1e-05	1e-05	1e-05	1e-05	1e-05	3.03929	1e-05	1e-05	1e-05	1e-05	1e-05	1e-05	1e-05	1e-05
CORO7	1e-05	1e-05	1e-05	1e-05	1e-05	1e-05	1e-05	0.00622865	1e-05	1e-05	1e-05	1e-05	1e-05	1e-05	0.540725	1e-05	1e-05	1e-05	1e-05	0.133162	1e-05	1e-05	1e-05	1e-05	1e-05	1e-05	0.94082	1e-05	1e-05	0.0505889	1e-05	1e-05	1e-05	0.698406	0.0147312	0.0502542	1e-05	1e-05	1e-05	1e-05	1e-05	1e-05	1e-05	1e-05	1e-05	1e-05	1e-05	1e-05	1e-05
FUT6	1e-05	1e-05	1e-05	1e-05	1e-05	1e-05	1e-05	0.00307504	1e-05	1e-05	1e-05	1e-05	1e-05	1e-05	1e-05	0.0249766	1e-05	1e-05	1e-05	1e-05	1e-05	1e-05	1e-05	1e-05	1e-05	1e-05	1e-05	1e-05	1e-05	0.0023133	1e-05	1e-05	1e-05	1e-05	1e-05	1e-05	1e-05	1e-05	1e-05	1e-05	0.0235232	1e-05	1e-05	1e-05	1e-05	1e-05	1e-05	0.00337172	0.0291195
SNAPIN	1e-05	1e-05	1e-05	1e-05	1e-05	1e-05	1e-05	0.533346	1e-05	1e-05	0.197478	1e-05	1e-05	1e-05	1e-05	1e-05	1e-05	1e-05	1e-05	1e-05	1e-05	1e-05	1e-05	1e-05	0.242409	1e-05	1e-05	1e-05	1e-05	1e-05	0.313107	0.700812	1e-05	1e-05	1e-05	1e-05	1e-05	1e-05	1e-05	0.227705	1e-05	0.325408	0.461958	1e-05	1e-05	1e-05	1e-05	1e-05	1e-05
SSRP1	1e-05	1e-05	1e-05	1e-05	1e-05	1e-05	1e-05	2.07747	0.560683	1e-05	1e-05	1e-05	1e-05	1.82664	1e-05	1e-05	0.0211485	1e-05	0.0269878	0.337072	1e-05	1e-05	1e-05	1e-05	1e-05	1e-05	1e-05	0.02821	0.0553842	1e-05	1e-05	0.331452	1e-05	1e-05	1e-05	1e-05	1e-05	1e-05	1e-05	1e-05	0.198922	1e-05	1e-05	0.0864786	1e-05	1e-05	1.1839	1e-05	1e-05
AASS	1e-05	1e-05	1e-05	1e-05	1e-05	1e-05	1e-05	1e-05	0.328842	1e-05	1e-05	1e-05	0.199444	1e-05	1e-05	1e-05	1e-05	1e-05	0.168501	1e-05	0.00614195	1e-05	0.294168	1e-05	0.0522299	0.189182	1e-05	1e-05	1e-05	1e-05	1e-05	1e-05	1e-05	1e-05	1e-05	1e-05	1e-05	1e-05	1e-05	0.0986588	0.158734	1e-05	1e-05	1e-05	1e-05	0.373947	1e-05	1e-05	1e-05
BAZ1B	1e-05	1e-05	1e-05	1e-05	1e-05	1e-05	1e-05	1e-05	3.02986	1e-05	0.0139762	0.0868995	1e-05	1e-05	1e-05	1e-05	1e-05	1e-05	1e-05	1e-05	1e-05	1e-05	1e-05	1e-05	1e-05	1e-05	1e-05	2.93751	1e-05	1e-05	1e-05	1e-05	1.70646	1e-05	2.77831	1e-05	1e-05	0.0214838	1e-05	1e-05	1e-05	1e-05	1e-05	3.00712	1e-05	1e-05	0.00247758	1e-05	1e-05
HDHD2	1e-05	1e-05	1e-05	1e-05	1e-05	1e-05	1e-05	1e-05	2.50256	1.73529	1.27363	1e-05	8.58974	2.4536	1e-05	5.44369	0.0396759	1e-05	1e-05	1.16698	3.08554	1.78008	1e-05	1e-05	1e-05	1e-05	1e-05	0.39503	0.0678796	0.00825181	1e-05	1e-05	1e-05	1.07365	0.403303	0.57984	3.44295	1e-05	1e-05	1e-05	1e-05	3.7425	1e-05	1e-05	1.89495	3.26231	1.47911	1.20021	3.14825
IFIT2	1e-05	1e-05	1e-05	1e-05	1e-05	1e-05	1e-05	1e-05	0.0421242	1e-05	1e-05	1e-05	1e-05	1e-05	1e-05	1e-05	1e-05	1e-05	1e-05	1e-05	1e-05	1e-05	1e-05	1e-05	1e-05	1e-05	1e-05	1e-05	1e-05	1e-05	1e-05	1e-05	1e-05	1e-05	1e-05	1e-05	1e-05	0.0156449	1e-05	1e-05	0.0583676	1e-05	1e-05	0.0124177	1e-05	1e-05	1e-05	1e-05	1e-05
KLF5	1e-05	1e-05	1e-05	1e-05	1e-05	1e-05	1e-05	1e-05	0.354154	1e-05	1e-05	1e-05	1e-05	0.345256	1e-05	1e-05	1e-05	1e-05	1e-05	1e-05	1e-05	1e-05	1e-05	0.449839	1e-05	1e-05	1e-05	1e-05	1e-05	1e-05	1e-05	1e-05	1e-05	1e-05	1e-05	1e-05	1e-05	0.375257	1e-05	0.162302	1e-05	1e-05	1e-05	1e-05	1e-05	1e-05	1e-05	1e-05	1e-05
SPECC1L	1e-05	1e-05	1e-05	1e-05	1e-05	1e-05	1e-05	1e-05	0.794392	1e-05	1e-05	1e-05	1e-05	1e-05	3.48297	1e-05	1e-05	1e-05	1e-05	1e-05	1e-05	0.373888	1e-05	1e-05	1e-05	1e-05	5.08751	1e-05	1e-05	1e-05	1e-05	1.49299	1e-05	1e-05	1e-05	1e-05	1e-05	1e-05	0.422795	0.323776	2.7843	1e-05	1e-05	1e-05	1e-05	2.26658	1e-05	1e-05	4.82483
UQCR10	1e-05	1e-05	1e-05	1e-05	1e-05	1e-05	1e-05	1e-05	0.120407	1e-05	1e-05	1e-05	2.98413	1e-05	1e-05	1e-05	1e-05	1e-05	1e-05	1e-05	1e-05	1e-05	1e-05	1e-05	1e-05	1e-05	1e-05	1e-05	1e-05	1e-05	1e-05	1e-05	1.96331	1e-05	1e-05	1e-05	1e-05	1e-05	1e-05	1e-05	1e-05	1e-05	5.36694	1e-05	1e-05	1e-05	1e-05	4.53232	1e-05
AIMP1	1e-05	1e-05	1e-05	1e-05	1e-05	1e-05	1e-05	1e-05	1e-05	15.4612	19.9738	1e-05	1e-05	1e-05	0.056874	0.350798	1e-05	1e-05	1e-05	1e-05	1e-05	1e-05	1e-05	0.605148	1e-05	1e-05	0.125613	1e-05	1e-05	1e-05	1e-05	15.7603	1.5187	1e-05	14.9069	1e-05	1.67211	1e-05	1.21139	0.177455	0.363023	6.9631	1e-05	1e-05	1e-05	1e-05	0.834829	1e-05	1e-05
CEACAM7	1e-05	1e-05	1e-05	1e-05	1e-05	1e-05	1e-05	1e-05	1e-05	55.5194	34.7576	1e-05	0.878653	67.118	1e-05	1.05158	0.236478	1e-05	58.8271	1e-05	1e-05	1e-05	1e-05	47.1876	50.8973	17.9667	29.9104	49.7223	25.7154	1e-05	1e-05	28.5634	52.9835	19.122	45.8017	36.6503	1e-05	1e-05	30.8389	33.4445	71.0591	35.7567	1e-05	40.2369	1e-05	42.3201	1e-05	1e-05	1e-05
RRAD	1e-05	1e-05	1e-05	1e-05	1e-05	1e-05	1e-05	1e-05	1e-05	0.224658	1e-05	1e-05	1e-05	1e-05	1e-05	0.672774	1e-05	1e-05	1e-05	0.0729083	1e-05	1e-05	1e-05	1e-05	0.214682	1e-05	1e-05	1e-05	1e-05	1e-05	1e-05	1e-05	1e-05	1e-05	1e-05	1e-05	1e-05	1e-05	1e-05	1e-05	0.0962832	1e-05	1e-05	1e-05	1e-05	1e-05	1e-05	1e-05	1e-05
NUP188	1e-05	1e-05	1e-05	1e-05	1e-05	1e-05	1e-05	1e-05	1e-05	1e-05	0.0668091	1e-05	1e-05	1e-05	1e-05	1e-05	1e-05	1e-05	1e-05	0.0466126	1e-05	1e-05	1e-05	0.0140906	1e-05	1e-05	1e-05	1e-05	0.106234	1e-05	1e-05	0.0941762	0.0077843	1e-05	1e-05	1e-05	1e-05	1e-05	1e-05	1e-05	1e-05	1e-05	1e-05	1e-05	1e-05	1e-05	1e-05	1e-05	1e-05
OTC	1e-05	1e-05	1e-05	1e-05	1e-05	1e-05	1e-05	1e-05	1e-05	1e-05	0.189853	3.30547	1e-05	1e-05	1e-05	1e-05	0.235585	1e-05	17.9883	1e-05	1e-05	1e-05	1.62514	1e-05	0.540203	1e-05	13.4453	1e-05	1e-05	1e-05	1e-05	1e-05	1e-05	1e-05	1e-05	1e-05	1e-05	1e-05	1e-05	4.93522	1e-05	1e-05	1e-05	1e-05	2.27042	1e-05	1e-05	1e-05	1e-05
RHOT1	1e-05	1e-05	1e-05	1e-05	1e-05	1e-05	1e-05	1e-05	1e-05	1e-05	0.09225	1e-05	1e-05	1e-05	1e-05	1e-05	1e-05	1e-05	1e-05	1e-05	1e-05	1e-05	1e-05	1e-05	0.107746	1e-05	1e-05	1e-05	1e-05	1e-05	1e-05	1e-05	1e-05	1e-05	1e-05	1e-05	1e-05	1e-05	1e-05	1e-05	1e-05	1e-05	1e-05	1e-05	1e-05	1e-05	0.375245	1e-05	1e-05
TRNT1	1e-05	1e-05	1e-05	1e-05	1e-05	1e-05	1e-05	1e-05	1e-05	1e-05	0.0281179	1e-05	1e-05	1e-05	1e-05	1e-05	1e-05	1e-05	1e-05	1e-05	1e-05	1e-05	1e-05	1e-05	1e-05	1e-05	1e-05	1e-05	1e-05	1e-05	0.0297721	1e-05	1e-05	1e-05	1e-05	1e-05	1e-05	1e-05	0.0451246	0.0181549	0.03271	1e-05	1e-05	1e-05	0.0149532	0.0200057	1e-05	1e-05	1e-05
ZCCHC10	1e-05	1e-05	1e-05	1e-05	1e-05	1e-05	1e-05	1e-05	1e-05	1e-05	3.93847	1e-05	1e-05	1e-05	1e-05	1e-05	1e-05	1e-05	1e-05	1e-05	1e-05	1e-05	1e-05	1e-05	1e-05	1e-05	1e-05	1e-05	1e-05	1e-05	1e-05	1.57007	1e-05	1e-05	1e-05	1e-05	1e-05	1e-05	0.265438	1e-05	2.36199	1e-05	1e-05	1e-05	1e-05	1e-05	1e-05	1e-05	1e-05
NPEPL1	1e-05	1e-05	1e-05	1e-05	1e-05	1e-05	1e-05	1e-05	1e-05	1e-05	1e-05	0.0312311	1e-05	1e-05	1e-05	1e-05	1e-05	1e-05	1e-05	1e-05	0.11848	1e-05	1e-05	0.0203711	1e-05	1e-05	1e-05	1e-05	1e-05	1e-05	1e-05	0.0513109	0.103042	1e-05	1e-05	1e-05	1e-05	1e-05	1e-05	1e-05	1e-05	1e-05	1e-05	1e-05	1e-05	0.15319	1e-05	1e-05	1e-05
NUDT19	1e-05	1e-05	1e-05	1e-05	1e-05	1e-05	1e-05	1e-05	1e-05	1e-05	1e-05	1.42501	1e-05	1e-05	1e-05	1e-05	1e-05	1e-05	1e-05	1e-05	1e-05	0.567902	1e-05	1e-05	1e-05	1.22455	1e-05	1e-05	1e-05	1e-05	1e-05	1e-05	1e-05	1e-05	1e-05	1e-05	1e-05	1e-05	1e-05	1e-05	1e-05	1e-05	0.13776	1e-05	1.10583	1e-05	1e-05	1e-05	0.0596463
UCHL1	1e-05	1e-05	1e-05	1e-05	1e-05	1e-05	1e-05	1e-05	1e-05	1e-05	1e-05	0.082986	1e-05	0.707148	1e-05	1e-05	1e-05	1e-05	1e-05	1e-05	0.210775	1e-05	1e-05	1e-05	1e-05	0.168626	1e-05	1e-05	1e-05	1e-05	1e-05	0.563704	1e-05	1e-05	1e-05	1e-05	0.387459	1e-05	0.00815207	1e-05	1e-05	1e-05	1e-05	1e-05	1e-05	1e-05	1e-05	1e-05	1e-05
GNL3L	1e-05	1e-05	1e-05	1e-05	1e-05	1e-05	1e-05	1e-05	1e-05	1e-05	1e-05	1e-05	0.138067	1e-05	1e-05	1e-05	1e-05	1e-05	1e-05	1e-05	1e-05	1e-05	1e-05	1e-05	1e-05	1e-05	1e-05	1e-05	1e-05	1e-05	1e-05	1e-05	1e-05	0.107371	1e-05	1e-05	1e-05	1e-05	1e-05	1e-05	1e-05	1e-05	1e-05	1e-05	1e-05	1e-05	0.216054	1e-05	1e-05
PEF1	1e-05	1e-05	1e-05	1e-05	1e-05	1e-05	1e-05	1e-05	1e-05	1e-05	1e-05	1e-05	0.115636	1e-05	1e-05	0.444165	1e-05	1e-05	1e-05	0.334051	1e-05	1e-05	1e-05	1e-05	0.350884	1e-05	1e-05	1e-05	1e-05	1e-05	1e-05	1e-05	1e-05	1e-05	1e-05	1e-05	1e-05	0.785355	1e-05	1e-05	1e-05	1e-05	1e-05	0.258189	0.58111	1e-05	1e-05	1e-05	1e-05
ANXA8	1e-05	1e-05	1e-05	1e-05	1e-05	1e-05	1e-05	1e-05	1e-05	1e-05	1e-05	1e-05	1e-05	0.193557	1e-05	1e-05	0.853869	1e-05	1.23401	1.04526	1e-05	1e-05	1e-05	1e-05	1.31133	1e-05	0.997855	1e-05	1e-05	1e-05	1e-05	1e-05	1e-05	1e-05	1e-05	1e-05	1e-05	1e-05	1e-05	1e-05	1e-05	1e-05	1e-05	0.885875	1e-05	0.186718	1e-05	1e-05	1e-05
ANXA8L1	1e-05	1e-05	1e-05	1e-05	1e-05	1e-05	1e-05	1e-05	1e-05	1e-05	1e-05	1e-05	1e-05	0.193557	1e-05	1e-05	0.853869	1e-05	1.23401	1.04526	1e-05	1e-05	1e-05	1e-05	1.31133	1e-05	0.997855	1e-05	1e-05	1e-05	1e-05	1e-05	1e-05	1e-05	1e-05	1e-05	1e-05	1e-05	1e-05	1e-05	1e-05	1e-05	1e-05	0.885875	1e-05	0.186718	1e-05	1e-05	1e-05
URB1	1e-05	1e-05	1e-05	1e-05	1e-05	1e-05	1e-05	1e-05	1e-05	1e-05	1e-05	1e-05	1e-05	0.147902	0.354861	1e-05	1e-05	1e-05	1e-05	1e-05	1e-05	1e-05	1e-05	0.397454	1e-05	1e-05	1e-05	1e-05	0.147818	1e-05	1e-05	1e-05	1e-05	0.386058	1e-05	0.232221	1e-05	0.237515	1e-05	1e-05	1e-05	1e-05	1e-05	1e-05	1e-05	1e-05	1e-05	1e-05	1e-05
PRPF3	1e-05	1e-05	1e-05	1e-05	1e-05	1e-05	1e-05	1e-05	1e-05	1e-05	1e-05	1e-05	1e-05	1e-05	0.0195115	1e-05	0.021452	1e-05	1e-05	1e-05	1e-05	1e-05	1e-05	1e-05	1e-05	1e-05	1e-05	1e-05	1e-05	1e-05	1e-05	1e-05	1e-05	1e-05	1e-05	1e-05	1e-05	1e-05	1e-05	1e-05	1e-05	1e-05	1e-05	1e-05	1e-05	1e-05	1e-05	1e-05	1e-05
ENTPD3	1e-05	1e-05	1e-05	1e-05	1e-05	1e-05	1e-05	1e-05	1e-05	1e-05	1e-05	1e-05	1e-05	1e-05	1e-05	1e-05	2.60704	1.30317	1e-05	1e-05	1e-05	1e-05	1e-05	1e-05	1e-05	1e-05	1e-05	1e-05	1e-05	1e-05	1e-05	1e-05	1e-05	1e-05	1e-05	1e-05	1e-05	0.314569	1e-05	1e-05	1e-05	1e-05	1e-05	1e-05	1e-05	1e-05	1e-05	1e-05	1e-05
GKN1	1e-05	1e-05	1e-05	1e-05	1e-05	1e-05	1e-05	1e-05	1e-05	1e-05	1e-05	1e-05	1e-05	1e-05	1e-05	1e-05	0.922244	1e-05	0.206913	1e-05	1e-05	1e-05	1e-05	0.506102	1e-05	1e-05	1e-05	1e-05	1e-05	1e-05	0.234841	1e-05	0.311377	1e-05	1e-05	0.687231	1e-05	1e-05	1e-05	1e-05	1e-05	1e-05	1e-05	1e-05	1e-05	1e-05	1e-05	1e-05	1e-05
METTL14	1e-05	1e-05	1e-05	1e-05	1e-05	1e-05	1e-05	1e-05	1e-05	1e-05	1e-05	1e-05	1e-05	1e-05	1e-05	1e-05	0.300695	1e-05	0.0464378	1e-05	1e-05	1e-05	1e-05	1e-05	1e-05	1e-05	1e-05	1e-05	1e-05	0.368028	1e-05	1e-05	1e-05	1e-05	1e-05	1e-05	0.226904	0.337967	1e-05	1e-05	1e-05	1e-05	1e-05	1e-05	1e-05	1e-05	1e-05	1e-05	1e-05
MRPS15	1e-05	1e-05	1e-05	1e-05	1e-05	1e-05	1e-05	1e-05	1e-05	1e-05	1e-05	1e-05	1e-05	1e-05	1e-05	1e-05	1e-05	24.0445	1e-05	13.58	0.0460524	1e-05	1e-05	1e-05	1e-05	1e-05	1e-05	1e-05	1e-05	1e-05	1e-05	1e-05	1e-05	25.0615	1e-05	1e-05	1e-05	1e-05	1e-05	1e-05	11.2173	1e-05	9.87936	1e-05	1e-05	1e-05	1e-05	1e-05	1e-05
RAB11A	1e-05	1e-05	1e-05	1e-05	1e-05	1e-05	1e-05	1e-05	1e-05	1e-05	1e-05	1e-05	1e-05	1e-05	1e-05	1e-05	1e-05	0.0592302	1e-05	1e-05	1e-05	1e-05	1e-05	1e-05	1e-05	0.00591073	0.00296639	1e-05	1e-05	1e-05	1e-05	0.358008	1e-05	0.0115269	1e-05	1e-05	1e-05	1e-05	1e-05	0.00691906	1e-05	4.23367	1e-05	1e-05	1e-05	1e-05	1e-05	1e-05	1e-05
FAM126B	1e-05	1e-05	1e-05	1e-05	1e-05	1e-05	1e-05	1e-05	1e-05	1e-05	1e-05	1e-05	1e-05	1e-05	1e-05	1e-05	1e-05	1e-05	0.10537	1e-05	1e-05	1e-05	1e-05	0.157286	1e-05	1e-05	0.254115	1e-05	1e-05	1e-05	1e-05	1e-05	1e-05	1e-05	0.0858279	1e-05	1e-05	1e-05	0.288535	1e-05	1e-05	1e-05	1e-05	1e-05	1e-05	0.0989112	1e-05	1e-05	1e-05
SLC16A3	1e-05	1e-05	1e-05	1e-05	1e-05	1e-05	1e-05	1e-05	1e-05	1e-05	1e-05	1e-05	1e-05	1e-05	1e-05	1e-05	1e-05	1e-05	1e-05	0.605033	1e-05	1e-05	1e-05	1e-05	1e-05	1e-05	1e-05	1e-05	1e-05	1e-05	1e-05	0.197542	1e-05	0.509483	1e-05	1e-05	1e-05	1e-05	1e-05	1e-05	1e-05	1e-05	0.395755	1e-05	1e-05	1e-05	1e-05	1e-05	1e-05
MAPK8	1e-05	1e-05	1e-05	1e-05	1e-05	1e-05	1e-05	1e-05	1e-05	1e-05	1e-05	1e-05	1e-05	1e-05	1e-05	1e-05	1e-05	1e-05	1e-05	1e-05	0.0145827	0.00419326	1e-05	1e-05	1e-05	1e-05	1e-05	1e-05	1e-05	0.0144674	1e-05	1e-05	1e-05	1e-05	1e-05	1e-05	1e-05	1e-05	0.00360685	1e-05	1e-05	1e-05	1e-05	1e-05	1e-05	1e-05	1e-05	1e-05	1e-05
TMEM230	1e-05	1e-05	1e-05	1e-05	1e-05	1e-05	1e-05	1e-05	1e-05	1e-05	1e-05	1e-05	1e-05	1e-05	1e-05	1e-05	1e-05	1e-05	1e-05	1e-05	1e-05	1e-05	0.699598	1e-05	1e-05	1e-05	1e-05	1e-05	0.361091	1e-05	1e-05	1e-05	1e-05	1e-05	1e-05	1e-05	1e-05	1e-05	1e-05	1e-05	1e-05	1e-05	1e-05	0.303483	0.399358	1e-05	1e-05	1e-05	1e-05
CDKN2C	1e-05	1e-05	1e-05	1e-05	1e-05	1e-05	1e-05	1e-05	1e-05	1e-05	1e-05	1e-05	1e-05	1e-05	1e-05	1e-05	1e-05	1e-05	1e-05	1e-05	1e-05	1e-05	1e-05	105.205	1e-05	1e-05	1e-05	1e-05	1e-05	1e-05	1e-05	1e-05	1e-05	1e-05	1e-05	1e-05	1e-05	113.444	114.704	1e-05	1e-05	107.154	1e-05	1e-05	1e-05	1e-05	0.619835	1e-05	1e-05
SCAF1	1e-05	1e-05	1e-05	1e-05	1e-05	1e-05	1e-05	1e-05	1e-05	1e-05	1e-05	1e-05	1e-05	1e-05	1e-05	1e-05	1e-05	1e-05	1e-05	1e-05	1e-05	1e-05	1e-05	1e-05	1e-05	1e-05	0.225433	0.148218	0.0541458	1e-05	1e-05	1e-05	1e-05	1e-05	1e-05	1e-05	1e-05	0.12288	0.0937094	1e-05	1e-05	0.263425	1e-05	1e-05	1e-05	1e-05	1e-05	1e-05	1e-05
ZC3HAV1L	1e-05	1e-05	1e-05	1e-05	1e-05	1e-05	1e-05	1e-05	1e-05	1e-05	1e-05	1e-05	1e-05	1e-05	1e-05	1e-05	1e-05	1e-05	1e-05	1e-05	1e-05	1e-05	1e-05	1e-05	1e-05	1e-05	1e-05	1e-05	1e-05	1e-05	1e-05	1e-05	1e-05	1e-05	1.41116	1e-05	1e-05	1e-05	1e-05	1e-05	0.318472	1e-05	1e-05	0.272918	1e-05	1e-05	1e-05	1e-05	1e-05
NOVA2	1e-05	1e-05	1e-05	1e-05	1e-05	1e-05	1e-05	1e-05	1e-05	1e-05	1e-05	1e-05	1e-05	1e-05	1e-05	1e-05	1e-05	1e-05	1e-05	1e-05	1e-05	1e-05	1e-05	1e-05	1e-05	1e-05	1e-05	1e-05	1e-05	1e-05	1e-05	1e-05	1e-05	1e-05	1e-05	1e-05	1e-05	1e-05	1e-05	1e-05	1e-05	1e-05	1e-05	1e-05	1e-05	1e-05	0.692783	1e-05	1e-05
[truncated: 52 more columns]

## Sheet: Cluster 1
Pathway name	#Entities found	#Entities total	Entities ratio	Entities pValue	Entities FDR	Submitted entities found
Cellular response to heat stress	15	135	0.00929624	1.33297e-07	2.43933e-05	NUP188;HSPA5;HSPA1B;HSPA1A
Dissolution of Fibrin Clot	5	14	0.000964055	1.07624e-05	0.00139911	ANXA2;SERPINC1;SERPINE1;FETUB;PLG
DNA methylation	5	36	0.002479	0.000848676	0.0347957	H2AZ1;H2AZ2;H2AC6;H2AC4;H4C1

## Sheet: Cluster 2
Pathway name	#Entities found	#Entities total	Entities ratio	Entities pValue	Entities FDR	Species name	Submitted entities found
Regulation of Insulin-like Growth Factor (IGF) transport and uptake by Insulin-like Growth Factor Binding Proteins (IGFBPs)	5	127	0.00874535	0.000439991	0.101198	Homo sapiens	RCN1;PRKCSH;SERPINA10;PCSK9;APOE
Platelet Adhesion to exposed collagen	2	16	0.00110178	0.00294768	0.224024	Homo sapiens	VWF;ITGA2
Response to elevated platelet cytosolic Ca2+	4	144	0.00991599	0.00582374	0.226349	Homo sapiens	SERPINA3;ITIH3;VWF;FERMT3

## Sheet: 7E
Symbol	FC	P value
A1BG	0.9618	0.4028
A2M	0.715628	0.341945
A2ML1	0.399803	0.360509
AAGAB	0.236347	0.189149
AARS1	1.35758	0.697869
AARSD1	0.992122	0.979562
ABAT	0.639793	0.406488
ABCB1	0.533233	0.184018
ABCD1	1.03249	0.952734
ABCD2	0.893625	0.861881
ABCD3	1.71127	0.370578
ABCE1	0.623752	0.296861
ABCF1	0.548453	0.52599
ABCF2	1.28423	0.365977
ABCF3	0.83275	0.548002
ABHD16A	1.03497	0.970846
ABI3BP	0.92329	0.370582
ACACA	1.16704	0.0462785
ACACB	1.1175	0.0918842
ACADM	1.70362	0.669609
ACADVL	4.19277	0.0320972
ACAN	0.549216	0.142791
ACAT1	0.934694	0.839451
ACE	1.08644	0.813554
ACO1	1.2463	0.28055
ACO2	0.676289	0.291963
ACOT9	0.918116	0.821359
ACOX3	0.300194	0.0929457
ACR	0.711226	0.0828746
ACSL1	1.50711	0.0474925
ACSM2A	21.8095	0.346784
ACTA1	1.84666	0.0828821
ACTA2	1.86633	0.0861466
ACTB	1.74827	0.0962513
ACTBL2	1.87939	0.102148
ACTC1	1.85277	0.084281
ACTG1	1.74827	0.0962513
ACTG2	1.85102	0.0956431
ACTN1	1.12655	0.578549
ACTN2	2.68036	0.102495
ACTN3	1.54535	0.289892
ACTN4	0.813328	0.266919
ACTR1A	1.14838	0.681062
ACTR1B	1.18018	0.487997
ACTR2	0.967172	0.834913
ACTR3	1.00369	0.99074
ACY1	0.950746	0.788635
ADA	0.511816	0.204126
ADA2	0.508962	0.16934
ADAMDEC1	0.371092	0.0724078
ADAMTS13	0.752295	0.0753335
ADAMTSL4	0.745791	0.229627
ADAR	1.0995	0.859213
ADD1	1.64324	0.346405
ADD2	0.599458	0.326473
ADD3	0.453571	0.145116
ADGRB3	1.18371	0.419288
ADGRE5	1.07051	0.741113
ADGRF5	0.849485	0.591695
ADGRG6	1.10404	0.599028
ADGRL1	0.998092	0.994629
ADH1A	0.213995	0.0473292
ADH1C	1.09165	0.853666
ADIPOQ	0.930364	0.625612
ADK	0.183813	0.175195
ADPRS	0.930198	0.896959
ADRM1	0.760758	0.625872
ADSL	0.794871	0.401628
ADSS2	0.902979	0.820407
AEBP1	0.936192	0.800066
AFDN	1.06508	0.818878
AFG3L2	1.52726	0.391646
AFM	0.876664	0.0125996
AGA	0.298032	0.312541
AGO2	1.11989	0.748739
AGR3	4.75911	0.357133
AGT	1.06529	0.233878
AHNAK	0.668381	0.0672037
AHNAK2	0.398671	0.0659301
AHSG	0.831257	0.0224573
AIDA	1.0923	0.896656
AIP	0.170849	0.192639
AK1	2.00675	0.126058
AK3	1.47752	0.498075
AK4	11.6971	0.180678
AKAP12	1.03087	0.864626
AKAP8	1.25907	0.759885
AKR1B10	0.452983	0.11196
AKR1B15	1.13123	0.682442
AKR1C1	0.61912	0.303061
AKR1C3	0.671969	0.239136
AKR7A3	0.53256	0.326529
ALAD	1.06827	0.551593
ALB	1.09729	0.521255
ALCAM	1.22125	0.335161
ALDH16A1	0.835328	0.787206
ALDH2	0.972608	0.94466
ALDH6A1	1.07422	0.801891
ALDH7A1	1.02991	0.920991
ALDH9A1	0.857428	0.339934
ALDOA	1.19581	0.33214
ALDOB	1.09745	0.790562
ALDOC	1.04413	0.900878
ALPL	0.477353	0.177197
AMBP	0.962223	0.569021
AMER2	0.000911814	0.0788727
AMPD2	0.934552	0.905366
AMY1A	1.51408	0.298238
AMY2A	0.970856	0.936252
AMY2B	1.26185	0.47763
ANG	0.608765	0.169589
ANGPTL3	1.2869	0.198945
ANK1	0.941451	0.727467
ANK2	1.82275	0.596884
ANK3	0.765367	0.39604
ANKHD1	0.912575	0.825528
ANKRD17	0.907217	0.815709
ANKRD27	0.00856245	0.321019
ANKS1A	104.401	0.134872
ANPEP	0.992907	0.953176
ANXA1	0.927113	0.783706
ANXA11	1.09569	0.793804
ANXA13	1.11765	0.842195
ANXA2	0.509246	0.0157971
ANXA2P2	0.502776	0.0177482
ANXA3	0.829786	0.518033
ANXA4	0.838422	0.541607
ANXA5	0.552659	0.218692
ANXA6	0.877361	0.139729
AOC2	0.744076	0.216566
AOC3	1.48562	0.214508
AP2A2	0.971226	0.890367
AP3B1	0.422068	0.0618393
AP5B1	0.790443	0.513101
APBB1	1.26701	0.849085
APCS	1.02947	0.757861
APEX1	1.1527	0.623107
APLP1	0.497267	0.375676
APMAP	0.671872	0.0760958
APOA1	0.873553	0.00121985
APOA2	0.922662	0.408963
APOA4	0.543269	1.2437e-06
APOA5	1.65603	0.57102
APOB	1.15386	0.174474
APOC1	0.95542	0.63614
APOC2	1.16688	0.232404
APOC3	1.0291	0.80628
APOC4	1.1558	0.394888
APOD	0.965644	0.709406
APOE	1.35883	0.0144108
APOF	1.15222	0.235593
APOH	0.876132	0.254339
APOL1	0.977026	0.785215
APOM	0.95228	0.60967
APOO	1.44435	0.614892
APP	0.774608	0.0523867
APPL1	0.511884	0.377897
APPL2	1.25286	0.689498
APRT	0.462721	0.146261
AQR	0.981997	0.888025
ARAP1	1.11239	0.92419
ARCN1	1.44637	0.272152
ARF1	1.38251	0.490058
ARF3	1.38251	0.490058
ARF4	1.08307	0.363546
ARFGAP2	0.61558	0.224845
ARFGEF1	0.773134	0.623654
ARG1	1.19668	0.507841
ARHGAP17	0.905923	0.410368
ARHGAP25	0.307466	0.000207979
ARHGAP4	2.24759	0.339919
ARHGAP42	0.171888	0.0472782
ARHGAP5	6.02022	0.150395
ARHGDIA	0.704868	0.30547
ARHGDIB	1.54155	0.528404
ARHGEF10L	0.850891	0.714733
ARHGEF16	0.516007	0.447245
ARHGEF2	0.861918	0.534727
ARL6IP5	0.936955	0.876454
ARPC1B	1.03882	0.793763
ARPC2	0.83318	0.563069
ARPC4	1.1676	0.575499
ARSA	2.00463	0.287363
ART3	1.52802	0.36117
ART4	0.461101	0.212352
ASAH1	0.969635	0.943493
ASCC3	1.05358	0.854884
ASF1A	0.34111	0.0901318
ASGR2	0.767703	0.482741
ASL	1.02304	0.915244
ASPDH	0.476105	0.0839276
ASPH	0.454551	0.025788
ASPN	0.764455	0.750282
ASS1	0.947693	0.914351
ATF6B	1.56507	0.53365
ATIC	1.25457	0.46165
ATL3	1.52334	0.244555
ATP1A1	0.84521	0.370923
ATP1A2	0.927022	0.743682
ATP1A3	1.04054	0.855853
ATP1A4	0.984534	0.964545
ATP2A1	1.35769	0.245097
ATP2A2	2.29368	0.286073
ATP2A3	1.11485	0.734358
ATP2B4	0.536961	0.37205
ATP4A	0.833353	0.508872
ATP5F1A	1.1567	0.440232
ATP5F1B	1.28969	0.147796
ATP5F1D	0.59887	0.449507
ATP5ME	0.776304	0.759746
ATP5MPL	0.674518	0.388928
ATP5PB	1.4834	0.539765
ATP5PD	0.82239	0.498985
ATP5PO	1.41585	0.535911
ATP6AP1	1.10433	0.934203
ATP6AP2	0.911001	0.763591
ATP6V0A1	1.01641	0.910378
ATP6V1A	0.0831127	0.179061
ATP6V1E1	0.627063	0.186001
ATRN	0.896407	0.205189
ATXN10	0.0551073	0.292372
ATXN2L	1.25155	0.720106
AXL	0.777824	0.125344
AZGP1	0.987226	0.822162
B2M	0.956892	0.836361
B3GNT2	1.10651	0.721491
B3GNT3	0.46845	0.235396
B4GALT1	1.76613	0.372911
B4GALT5	1.88523	0.112007
B4GAT1	1.30117	0.240478
BAG2	1.25638	0.456991
BAG3	0.469105	0.346949
BAG6	0.514302	0.263246
BASP1	0.692579	0.557924
BAZ1A	0.00597252	0.139541
BCAM	5.00135	0.070899
BCAR1	1.2029	0.543769
BCHE	0.848109	0.058914
BCKDK	2.13378	0.630813
BCS1L	0.478702	0.179015
BHMT	1.00663	0.987263
BHMT2	0.513848	0.0303496
BICC1	0.48166	0.333168
BIN1	0.92426	0.669192
BLK	0.00222429	0.159908
BLM	0.43	0.249908
BLMH	1.72875	0.141167
BLOC1S2	0.189027	0.0634105
BLVRB	1.79174	0.20118
BPGM	1.0758	0.875743
BPIFB1	0.43428	0.105211
BPNT1	2.37803	0.141537
BSDC1	0.578438	0.581858
BST1	0.776903	0.0589768
BTD	0.948694	0.276188
BUB1B	1.20812	0.495788
BUB3	1.18595	0.603392
BZW2	1.93032	0.225758
C12orf45	1.47456	0.593813
C16orf58	0.952663	0.867566
C1QA	1.02128	0.928353
C1QB	0.975479	0.681657
C1QC	0.976557	0.675173
C1R	1.00569	0.951918
C1RL	0.937757	0.739315
C1S	1.07147	0.42161
C1orf50	3.29348	0.307685
C2	0.97465	0.571893
C3	1.02199	0.688664
C4A	0.975439	0.764843
C4B	0.973577	0.749244
C4BPA	0.973312	0.740293
C4BPB	0.81117	0.168461
C5	1.04554	0.429516
C6	1.04707	0.401042
C7	1.0164	0.878477
C7orf26	0.961972	0.961269
C8A	1.11986	0.251268
C8B	1.07065	0.541431
C8G	1.11127	0.219135
C9	1.52941	0.0137634
C9orf64	0.663556	0.267301
CA1	1.09534	0.730632
CA12	1.09702	0.918479
CA2	0.949346	0.711799
CA9	1.16653	0.716924
CACNA2D1	0.396418	0.00148329
CACNA2D2	0.891878	0.868513
CADM1	1.75125	0.391731
CALB1	0.0528366	0.165827
CALM1	1.3355	0.114219
CALM2	1.3355	0.114219
CALM3	1.3355	0.114219
CALML5	0.550864	0.0798552
CALR	1.20231	0.426398
CALU	1.46602	0.129422
CAMK1D	1.26941	0.629366
CAMK2D	0.83936	0.105314
CAMKK2	1.00928	0.939684
CAMP	1.02762	0.895493
CAND1	0.863431	0.659484
CANX	1.094	0.779073
CAP1	1.03438	0.871491
CAPNS1	0.85265	0.667769
CAPS	1.13188	0.808091
CAPZA2	0.720584	0.186303
CAPZB	2.64595	0.062472
CARS1	1.02755	0.961706
CASK	1.26665	0.594544
CASP14	1.01051	0.968481
CASP3	2.85136	0.122554
CASP4	0.719971	0.382091
CASP5	0.747959	0.461809
CAT	1.19082	0.326244
CCAR1	0.0305772	0.00406161
CCAR2	1.32347	0.324224
CCDC126	0.635838	0.0116571
CCDC22	0.288739	0.0692255
CCDC47	0.945856	0.934363
CCDC6	1.0705	0.908937
CCL14	0.653622	0.451526
CCNK	0.930617	0.727044
CCNT1	0.68213	0.355163
CCS	0.910117	0.775948
CCT2	0.975507	0.888995
CCT3	0.532828	0.251571
CCT5	1.24762	0.68196
CCT8	0.690367	0.301153
CD109	1.21975	0.648506
CD14	1.55775	0.0191879
CD163	0.721473	0.610849
CD248	0.279521	0.186793
CD276	0.080651	0.154628
CD2BP2	1.63687	0.651261
CD34	0.0583084	0.311525
CD44	0.9078	0.470722
CD46	6.39551	0.155032
CD55	0.777935	0.51876
CD5L	0.860559	0.330934
CD93	0.797584	0.401311
CDC37	0.496077	0.205257
CDC42	1.28186	0.681419
CDC42BPB	0.69542	0.584446
CDC42EP4	0.484027	0.075691
CDC73	1.28951	0.586652
CDH1	1.56857	0.546921
CDH13	0.705565	0.00970408
CDH2	1.034	0.82933
CDH5	1.00655	0.962489
CDK11A	1.58016	0.421442
CDK11B	1.58015	0.421442
CDK14	1.11505	0.82445
CDSN	0.458692	0.151218
CEACAM6	0.93518	0.575993
CEACAM8	0.791907	0.141668
CEL	0.746379	0.124081
CERT1	0.870815	0.850604
CES2	1.14535	0.881757
CETN2	0.777541	0.718557
CETP	1.35286	0.601581
CFAP36	0.000477592	0.234085
CFAP410	2.08436	0.154078
CFB	1.07238	0.239107
CFD	0.867886	0.255007
CFDP1	1.8713	0.658259
CFH	0.942687	0.230878
CFHR1	0.949061	0.340319
CFHR2	0.952332	0.866175
CFHR3	0.900384	0.203977
CFHR4	1.16511	0.490376
CFHR5	1.15336	0.256809
CFI	0.975819	0.643552
CFL1	1.29836	0.195891
CFL2	1.08861	0.682205
CFP	0.807889	0.0475399
CGN	0.360944	0.197488
CGREF1	0.964824	0.715133
CHGA	0.839401	0.550789
CHGB	0.829308	0.673006
CHI3L1	1.10612	0.676637
CHIT1	0.357795	0.0113308
CHL1	0.695305	0.0636466
CHMP4A	1.13298	0.523765
CHN1	1.25346	0.810062
CHST15	0.940206	0.793898
CIAO1	0.750537	0.248384
CIAO2A	1.9956	0.624575
CKAP4	3.4261	0.292128
CKM	1.02253	0.968872
CLASP2	0.91452	0.543587
CLC	1.5803	0.247338
CLEC11A	1.37958	0.597788
CLEC3B	0.832185	0.00238056
CLIC1	2.26651	0.0359297
CLIC4	1.66524	0.261472
CLMN	1.23988	0.430233
CLN5	1.43474	0.413247
CLPX	0.644932	0.466558
CLSTN1	0.892507	0.675289
CLTB	0.4272	0.219878
CLTC	0.888462	0.702291
CLTCL1	3.60067	0.329234
CLU	0.990778	0.904284
CLUH	1.82656	0.24908
CMBL	0.850714	0.697747
CMPK1	0.940261	0.911254
CNDP1	0.884721	0.477929
CNDP2	0.851638	0.567975
CNN1	1.33509	0.512623
CNN3	0.795124	0.666409
CNOT1	0.974608	0.950225
CNP	0.555907	0.150664
CNTN1	0.892454	0.546514
COG1	0.107683	0.000258852
COG3	0.350573	0.18928
COG4	1.13813	0.351054
COG5	0.945398	0.915743
COG6	0.800643	0.668444
COL12A1	1.09269	0.590654
COL16A1	1.33705	0.363061
COL18A1	1.08826	0.725348
COL1A1	1.10248	0.736074
COL1A2	0.739629	0.29284
COL3A1	0.771893	0.54657
COL4A2	0.855131	0.489767
COL5A2	1.11685	0.589142
COL6A1	0.997839	0.981959
COL6A2	2.14647	0.44006
COL6A3	0.842606	0.169758
COL6A5	0.880858	0.763812
COL7A1	1.07664	0.883117
COLEC10	0.69786	0.132965
COLEC11	0.825502	0.218364
COMMD5	0.627933	0.538604
COMP	0.766767	0.292499
COPA	0.90289	0.468451
COPB1	0.863829	0.827739
COPB2	0.57927	0.113744
COPE	0.141475	0.360187
COPG1	1.74727	0.41656
COPS5	0.689301	0.473995
COPZ1	1.20522	0.514538
COQ3	1.33542	0.421008
CORO1A	1.07927	0.786419
COX2	1.70545	0.336206
COX6B1	0.249265	0.0355998
CP	0.957147	0.43202
CPA1	1.00068	0.9964
CPA2	1.41328	0.539961
CPA3	1.07332	0.638812
CPA4	0.946577	0.901011
CPB1	0.381703	0.181025
CPB2	0.991222	0.893513
CPD	0.344428	0.218061
CPM	1.1252	0.341004
CPN1	1.04659	0.625351
CPN2	1.11927	0.206203
CPNE1	0.875086	0.619874
CPSF2	0.130861	0.252278
CPSF6	0.589831	0.0577379
CPT2	1.30696	0.431645
CRISP3	2.15782	0.222186
CRMP1	0.618603	0.646555
CROT	0.858874	0.416382
CRP	1.87361	0.0241947
CRTAC1	1.06659	0.705066
CRYAB	3.62148	0.365499
CRYL1	1.21634	0.772385
CS	0.335433	0.277488
CSF1R	0.837868	0.28989
CSK	1.04868	0.794497
CSN1S1	0.873109	0.577876
CSNK1A1	0.322394	0.322639
CSNK1A1L	1.19981	0.804647
CSNK2A1	1.92615	0.0829859
CSNK2A2	0.926239	0.952659
CSNK2A3	2.13303	0.056173
CSPG4	1.09053	0.423643
CST3	1.06818	0.484658
CST6	1.06405	0.797518
CSTA	1.38121	0.178496
CSTB	1.26644	0.526282
CSTF1	1.44556	0.235288
CSTF3	1.80403	0.50112
CTBS	0.582217	0.00636753
CTNND1	2.0548	0.475329
CTPS2	2.38287	0.00396285
CTSA	1.15641	0.628817
CTSB	0.640624	0.375273
CTSC	1.62749	0.358932
CTSD	2.32112	0.281375
CTSG	0.993083	0.979578
CTSH	0.506383	0.0199873
CTSL	0.984337	0.923504
CTSS	0.404315	0.0250391
CTSZ	0.869997	0.723349
CTTN	0.801812	0.129589
CUL4A	1.63322	0.353755
CUL4B	0.707393	0.109724
CUL5	0.48662	0.184265
CUTA	1.05608	0.88267
CYC1	0.931171	0.725291
CYCS	0.747753	0.211748
CYFIP1	1.71353	0.115062
CYFIP2	0.931161	0.701237
CYP27A1	0.745447	0.559827
CYRIB	0.920729	0.778062
DAB2	5.49113	0.164174
DAG1	1.04932	0.865357
DARS1	2.22915	0.2304
DAZAP1	0.689121	0.717763
DBH	1.1062	0.461441
DCAF7	0.156181	0.149153
DCD	0.738481	0.136272
DCLK1	0.623077	0.57977
DCN	1.0134	0.974202
DCPS	0.864804	0.248347
DCTN2	0.903028	0.376803
DCXR	0.568142	0.66389
DDAH1	0.0639932	0.145372
DDB1	2.24955	0.0231531
DDI2	2.37302	0.274951
DDRGK1	0.898961	0.85817
DDT	0.703442	0.494734
DDX1	2.04398	0.564779
DDX21	9.219	0.370993
DDX23	1.16779	0.344471
DDX39A	2.52853	0.196832
DDX39B	0.178765	0.0183123
DDX3X	0.165443	0.196583
DDX3Y	0.58193	0.0838381
DDX42	0.460308	0.303659
DECR1	1.77215	0.184293
DENND10	0.884849	0.818437
DENND10P1	0.884849	0.818437
DEPTOR	0.981484	0.985044
DERL1	0.537343	0.546028
DES	0.931234	0.829819
DGKA	2.891	0.358778
DGLUCY	0.698235	0.0922163
DHCR24	1.37945	0.47144
DHPS	0.44374	0.0811595
DHRS7	1.05157	0.951016
DHX29	5.06994	0.295404
DHX30	0.698418	0.27737
DHX36	0.890622	0.910109
DHX38	0.891934	0.798853
DHX8	0.683503	0.324464
DHX9	1.21595	0.30498
DIRAS2	1.09584	0.754857
DKK3	2.14875	0.203764
DLD	1.76604	0.271879
DLG1	0.423564	0.0359366
DLG2	0.04696	0.146566
DLG3	1.35937	0.686838
DMBT1	1.27639	0.671168
DMKN	0.229433	0.22477
DMTN	2.46108	0.310252
DMXL2	0.740232	0.803373
DNAJA2	0.17642	0.155175
DNAJB1	0.984106	0.967252
DNAJC13	1.13402	0.680425
DNM1	1.73482	0.410097
DNM1L	0.343672	0.224717
DNPEP	1.39239	0.516239
DNPH1	0.292267	0.265239
DOCK1	0.689868	0.515347
DOCK8	0.731529	0.195559
DPEP2	0.51191	0.155715
DPP3	1.11487	0.467732
DPP4	0.94952	0.669441
DPY30	1.11762	0.661995
DPYD	3.21996	0.251991
DPYSL2	1.08113	0.850031
DPYSL3	3.08823	0.0669283
DPYSL5	0.00176709	0.177117
DRG2	0.521555	0.345504
DSC1	1.98519	0.205265
DSG1	0.610427	0.0384357
DSG2	1.22347	0.459467
DSG3	1.11596	0.807866
DSP	1.1264	0.365429
DST	0.774668	0.320115
DTD1	3.44679	0.196423
DTNA	1.11739	0.769847
DTNB	1.06573	0.873028
DTX3L	0.887287	0.290132
DTYMK	1.85123	0.546681
DUOX1	0.780243	0.404627
DUOX2	0.00863531	0.31544
DUSP3	2.19536	0.202544
DUT	2.21211	0.342128
DYNC1H1	0.700911	0.0205972
DYNC1LI2	1.79346	0.492501
ECHDC1	1.35581	0.741189
ECHS1	13.2827	0.0789528
ECM1	0.901175	0.215529
ECPAS	1.08359	0.859063
EDC4	1.46026	0.443876
EED	0.972268	0.974279
EEF1A1	1.01797	0.935825
EEF1A1P5	1.01782	0.936379
EEF1A2	0.976768	0.920007
EEF1E1	0.321776	0.178237
EEF2	0.880685	0.115568
EFEMP1	1.06741	0.750071
EFHD1	2.22863	0.327082
EFNB2	1.11911	0.813875
EFTUD2	1.05133	0.85588
EGLN1	4.89589	0.416548
EHD1	1.12298	0.661586
EHD2	0.874237	0.570494
EIF2AK3	0.845901	0.807063
EIF2S1	0.136224	0.217996
EIF2S2	0.030509	0.0876274
EIF3A	1.14755	0.816395
EIF3B	0.368796	0.303495
EIF3L	0.371168	0.184784
EIF4A1	0.862428	0.326669
EIF4A2	0.883427	0.393527
EIF4A3	0.927824	0.895332
EIF4B	0.603587	0.15824
EIF4G1	4.29598	0.136413
EIF4G2	0.913324	0.729022
EIF4G3	0.83081	0.779655
EIF4H	0.0427786	0.166719
EIF5	0.784601	0.282441
EIF5A	1.09566	0.694604
EIPR1	0.0382839	0.243792
ELMOD2	0.601851	0.211246
ELN	1.17382	0.556571
ELOVL7	0.872303	0.844758
EMC1	1.25613	0.535417
EMD	6.14565	0.405448
EMILIN1	1.04725	0.87685
EMILIN3	0.525243	0.178738
ENAH	2.06277	0.150021
ENDOD1	0.780925	0.713578
ENG	1.23748	0.50677
ENO1	1.10679	0.630408
ENO2	1.25295	0.453627
ENOPH1	0.584997	0.246744
ENPEP	0.892594	0.552441
ENPP2	1.45155	0.125651
ENPP6	1.13904	0.507513
ENPP7	2.20241	0.0818107
ENTPD1	0.551438	0.169833
EPB41	2.37564	0.39066
EPB41L2	0.888176	0.839126
EPB41L3	0.834373	0.401852
EPB42	0.81385	0.24741
EPHA4	0.196548	0.00605362
EPPK1	0.871399	0.112822
EPRS1	0.844175	0.545479
EPS15	0.858063	0.130327
EPX	0.610765	0.116677
ERAP1	1.02544	0.920906
ERC1	0.519133	0.167076
ERGIC1	0.718886	0.36073
ERLEC1	0.864887	0.124115
ERLIN2	0.543728	0.482676
ERMAP	1.16793	0.679038
ERP29	1.07407	0.893704
ERP44	1.16237	0.718911
ESD	1.06311	0.692126
ESRP2	0.11819	0.162897
ESYT2	0.233959	0.0855291
ETFA	1.22922	0.615434
ETFB	1.00662	0.976451
EVI5L	21.1568	0.347489
EVPL	1.27724	0.689892
EXOC2	0.432488	0.0974808
EXOC3	0.801459	0.280216
EXOC7	0.989497	0.985773
EXOSC3	2.12088	0.394979
EXTL2	0.546959	0.0884058
EZR	0.920929	0.823489
F10	0.913485	0.185447
F11	0.919105	0.784322
F12	0.828382	0.0796157
F13A1	0.752831	0.0064784
F13B	0.868507	0.0533203
F2	0.968468	0.635062
F5	0.886158	0.209172
F7	0.966293	0.77197
F8A1	0.0285356	0.321102
F9	1.12585	0.107046
FAAH	0.602917	0.301344
FABP3	0.865131	0.738979
FABP5	0.551814	0.0707301
FAH	0.830126	0.446478
FAM135A	1.02472	0.826311
FAM20C	0.924263	0.79514
FAM3B	0.701587	0.560337
FAM3C	0.570974	0.0606058
FAM91A1	7.81312	0.212763
FAM98C	0.59235	0.521995
FAP	1.05943	0.885544
FARP1	1.34818	0.747791
FASN	1.04195	0.953284
FBLIM1	1.16342	0.759553
FBLL1	1.57515	0.725666
FBLN1	1.02616	0.797758
FBLN5	0.558177	0.492258
FBN1	0.980717	0.777383
FBN2	1.02516	0.68456
FBP1	1.08785	0.74709
FBXL20	0.00400148	0.321514
FBXO4	0.794296	0.176915
FCGBP	1.04427	0.833062
FCGR2A	3.58125	0.110476
FCGR3A	0.988229	0.925456
FCGR3B	0.860773	0.563972
FCN2	0.926626	0.723959
FCN3	1.00955	0.925172
FDFT1	0.80797	0.648075
FDXR	0.804937	0.34724
FERMT3	1.69274	0.0267644
FETUB	0.809472	0.0464548
FGA	0.995486	0.975757
FGB	1.32008	0.417021
FGFR1	0.950168	0.847385
FGFR2	0.719401	0.488284
FGG	1.62324	0.267872
FGL1	2.07686	0.00387965
FGL2	0.409001	0.204769
FH	1.80289	0.104524
FIGNL1	0.048537	0.321019
FKBP1A	1.0811	0.758262
FKBP4	1.50632	0.416799
FKBP7	1.43236	0.779281
FLG2	0.925527	0.824437
FLNA	1.33382	0.160592
FLNB	0.411812	0.0267961
FLNC	1.80902	0.042002
FLT4	0.842357	0.480927
FMO5	1.41156	0.387983
FN1	0.960781	0.777133
FNTA	0.491374	0.14741
FPR1	0.727519	0.550459
FREM2	0.95182	0.780583
FSTL1	0.82224	0.342074
FTH1	0.867461	0.717377
FTL	1.10771	0.809921
FUBP1	1.10779	0.629846
FUBP3	0.347189	0.0344772
FUCA1	0.924412	0.627788
FUCA2	0.485192	0.0193626
FXR1	2.62298	0.013322
FYB1	0.727628	0.574156
FYCO1	0.249618	0.148052
G3BP1	0.184335	0.350245
G6PD	0.715237	0.387624
GAA	0.529738	0.0255707
GALE	0.879932	0.524923
GALK1	1.07367	0.901124
GAMT	0.639353	0.652111
GANAB	0.70077	0.135372
GAPDH	1.05758	0.752823
GAPDHS	0.485949	0.220797
GARS1	0.952173	0.929638
GART	1.30917	0.0908264
GAS6	0.97376	0.842855
GATM	0.384824	0.0417944
GBA	32.9278	0.320121
GBP1	0.979126	0.96553
GBP2	24.2156	0.195381
GC	0.915092	0.0731219
GCDH	0.885265	0.805299
GCN1	0.785941	0.507824
GCNT3	0.477524	0.132243
GDA	1.53453	0.163132
GDAP1	0.746579	0.57614
GDI1	1.04337	0.766504
GDI2	1.28658	0.48413
GFAP	0.789336	0.264421
GFER	1.49703	0.656357
GFM1	0.553455	0.400864
GGCT	1.03235	0.934803
GGH	1.11312	0.571556
GIGYF2	0.81584	0.516017
GIMAP4	2.27474	0.123376
GINS4	2.5301	0.0212357
GIPC2	1.04481	0.9462
GIT1	0.496338	0.183415
GLG1	0.916838	0.830222
GLIPR2	0.719846	0.385721
GLO1	1.47203	0.327168
GLOD4	0.293081	0.00105001
GLRX3	0.67627	0.605141
GLTP	0.564111	0.269092
GLUD1	0.9452	0.773788
GLUD2	0.804882	0.461404
GM2A	0.810159	0.39449
GMDS	2.60452	0.329171
GMFB	0.264341	0.0145555
GMFG	0.703257	0.349924
GMPPA	1.07325	0.927512
GMPS	0.947769	0.920225
GNA15	3.99351	0.114561
GNAI1	1.67951	0.189563
GNAI2	1.55558	0.187081
GNAI3	0.965116	0.903528
GNAL	2.27461	0.0597103
GNAO1	1.84198	0.299429
GNAQ	1.10591	0.476061
GNAS	0.658541	0.316114
GNE	1.40027	0.636732
GNPNAT1	1.17188	0.794765
GNPTG	2.73186	0.494306
GNS	0.891116	0.906133
GOLGA4	0.435433	0.0240815
GOLGA5	1.19273	0.457626
GOLGB1	1.6158	0.419039
GOLM1	0.483716	0.0382273
GOSR2	1.12257	0.419618
GOT1	1.31047	0.767384
GOT2	0.579173	0.135325
GP1BA	0.723395	0.111206
GP2	0.337102	0.162565
GPI	1.03313	0.930518
GPLD1	0.741364	0.0182375
GPNMB	0.929827	0.721054
GPRC5C	0.797255	0.507407
GPT	0.316856	0.182404
GPX3	1.00174	0.975815
GRB2	0.522388	0.128744
GRIA2	4.46181	0.370621
GRK2	0.713454	0.311622
GSK3B	0.799294	0.701849
GSKIP	0.15032	0.00925368
GSN	0.945546	0.54731
GSPT1	0.428359	0.161612
GSPT2	0.533721	0.485746
GSR	1.15193	0.444409
GSS	1.36756	0.278257
GSTA1	1.08333	0.763434
GSTA2	1.08333	0.763434
GSTA3	1.13483	0.607452
GSTM1	1.16021	0.845804
GSTM4	1.62824	0.495097
GSTM5	1.78282	0.428474
GSTO1	1.00873	0.955026
GSTP1	0.575082	0.0769784
GSTT1	0.648045	0.365677
GTF2B	0.971894	0.952395
GTF2I	0.276078	0.0956625
GTPBP4	0.05143	0.122795
GZMK	2.95204	0.0695342
GZMM	0.711226	0.0828747
H1-2	0.875533	0.713972
H1-3	0.929068	0.849707
H1-4	1.80325	0.479879
H1-5	0.777964	0.153503
H2AC11	0.960248	0.847515
H2AC12	0.960248	0.847515
H2AC14	0.960248	0.847515
H2AC18	0.85103	0.503778
H2AC20	0.85147	0.505318
H2AC4	0.245128	0.00454944
H2AC6	0.245061	0.00454314
H2AC7	0.960512	0.848528
H2AJ	0.960829	0.849836
H2AW	0.245128	0.00454944
H2BC11	1.20471	0.395316
H2BC12	0.874936	0.375556
H2BC13	0.875053	0.376064
H2BC14	0.874936	0.375556
H2BC15	0.874936	0.375556
H2BC17	1.20471	0.395316
H2BC18	0.874936	0.375556
H2BC21	1.20471	0.395316
H2BC3	1.20471	0.395316
H2BC4	0.874936	0.375556
H2BC5	0.874936	0.375556
H2BC9	0.874936	0.375556
H2BU1	1.20483	0.395089
H3C15	1.15384	0.648622
H4C1	0.363941	0.00477401
H6PD	0.519438	0.0376746
HABP2	0.874329	0.0483919
HADH	1.4528	0.395567
HADHA	0.294692	0.0212618
HADHB	0.725183	0.322162
HBA1	4.28682	0.288662
HBB	2.35836	0.373795
HBD	1.23319	0.671735
HBE1	4.62586	0.305818
HBG1	1.87267	0.254491
HBG2	2.05593	0.304279
HBQ1	0.0237772	0.0637603
HCFC1	7.85546	0.33571
HCLS1	0.522821	0.307643
HDAC6	0.963489	0.956632
HDGF	0.390486	0.0574285
HDLBP	1.00832	0.979018
HECTD1	0.417996	0.23009
HEG1	0.883389	0.53382
HEPH	0.124439	0.369068
HEXA	1.03628	0.931145
HEXB	0.328288	0.197163
HEXD	0.241673	0.45532
HGFAC	0.925715	0.283097
HIBADH	1.0333	0.804475
HK1	0.939488	0.828499
HK2	0.914823	0.770865
HLA-A	0.97614	0.922504
HLA-C	3.99626	0.0725676
HLA-DRB1	0.725669	0.385018
HMBS	1.26603	0.175324
HMGB1	0.849569	0.406164
HMGB1P1	0.560722	0.0491979
HMGB2	0.723162	0.167649
HMGB3	0.991298	0.986598
HMGCS2	1.02213	0.930736
HMOX1	1.1321	0.620107
HNF4A	1.21385	0.212762
HNRNPA1	0.944362	0.935582
HNRNPA1L2	0.975701	0.972999
HNRNPA2B1	0.849781	0.483222
HNRNPF	0.636255	0.393892
HNRNPH1	0.702002	0.575394
HNRNPH2	0.348537	0.065389
HNRNPH3	0.622665	0.389882
HNRNPK	0.811008	0.19655
HNRNPM	0.870707	0.644554
HNRNPR	0.532082	0.028625
HNRNPU	0.742207	0.521523
HNRNPUL2	0.949559	0.950408
HOGA1	1.47177	0.703559
HP	1.13644	0.657427
HP1BP3	0.950537	0.663268
HPR	1.13475	0.691855
HPX	0.931276	0.0837504
HRG	0.926754	0.305188
HRNR	0.564886	0.194896
HSD11B2	2.58384	0.407996
HSD17B10	0.717375	0.72734
HSD17B4	1.03091	0.939384
HSP90AA1	0.88624	0.685031
HSP90AA2P	4.4661	0.0258127
HSP90AB1	1.27261	0.33692
HSP90AB2P	1.26797	0.594374
HSP90AB3P	1.10789	0.755036
HSP90AB4P	1.29151	0.489756
HSP90B1	1.14853	0.415819
HSPA12A	0.859378	0.756293
HSPA13	1.04433	0.858544
HSPA1A	0.594988	0.043316
HSPA1B	0.594988	0.043316
HSPA1L	0.827514	0.358307
HSPA2	0.858775	0.640762
HSPA4	1.0897	0.524677
HSPA5	0.755666	0.033067
HSPA6	0.721891	0.280307
HSPA7	0.876182	0.496936
HSPA8	1.31829	0.12706
HSPA9	2.50424	0.00280819
HSPB1	0.882844	0.780492
HSPB6	0.309578	0.209882
HSPB7	1.17932	0.321028
HSPD1	0.698289	0.203485
HSPG2	0.938511	0.664834
HSPH1	0.871135	0.496004
HTATSF1	0.743855	0.494837
HTT	0.735945	0.452937
HUWE1	1.1098	0.685172
HYI	1.5636	0.144993
HYOU1	1.16719	0.515614
IARS1	0.77383	0.437156
ICAM1	1.11929	0.410297
ICAM2	0.918047	0.378503
ICAM3	0.705495	0.430277
ICOSLG	0.67926	0.00309145
IDE	0.774472	0.79796
IDH1	0.671287	0.327891
IDH2	0.999301	0.998203
IFI35	0.973733	0.967473
IFIT5	0.0754491	0.112036
IGF1	1.21973	0.750286
IGF2BP3	0.362373	0.329503
IGF2R	1.28488	0.450212
IGFALS	0.903774	0.223181
IGFBP2	1.07912	0.689185
IGFBP3	0.833385	0.0875059
IGFBP4	0.898607	0.673627
IGFBP5	0.743813	0.216354
IGFBP6	0.934127	0.703405
IGFBP7	1.5844	0.0973198
IGHA1	0.806111	0.152169
IGHA2	0.886266	0.429291
IGHG1	0.857213	0.554398
IGHG2	0.857135	0.535859
IGHG3	0.905065	0.725302
IGHG4	0.799611	0.343031
IGHM	0.754499	0.139635
IGHV3-11	0.999783	0.999097
IGHV3-13	0.998749	0.994806
IGHV3-15	0.721867	0.448295
IGHV3-20	0.997637	0.990185
IGHV3-21	0.999783	0.999097
IGHV3-23	1.00505	0.990004
IGHV3-30	1.03134	0.922135
IGHV3-30-3	1.05078	0.874967
IGHV3-30-5	1.03134	0.922135
IGHV3-33	1.05078	0.874967
IGHV3-38	1.71163	0.48814
IGHV3-43	0.998749	0.994806
IGHV3-43D	0.998749	0.994806
IGHV3-48	0.999783	0.999096
IGHV3-49	0.580288	0.475195
IGHV3-53	1.04219	0.918426
IGHV3-66	1.04219	0.918426
IGHV3-7	0.916083	0.59959
IGHV3-72	0.673158	0.240482
IGHV3-73	0.783913	0.403257
IGHV3-74	0.717276	0.179393
IGHV3-9	0.99973	0.998878
IGHV5-10-1	32.7547	0.31195
IGHV5-51	3.11404	0.424762
IGKC	0.888217	0.364869
IGKV1-27	1.18906	0.790019
IGKV1-33	0.206653	0.143329
IGKV1-8	0.62076	0.179965
IGKV1-9	0.632425	0.226328
IGKV1D-33	0.206653	0.143329
IGKV2-24	0.94496	0.830763
IGKV2-28	0.852219	0.351332
IGKV2-29	0.855896	0.376942
IGKV2-30	0.21831	0.0918918
IGKV2-40	0.846819	0.338903
IGKV2D-24	0.94496	0.830763
IGKV2D-26	0.862848	0.405214
IGKV2D-28	0.852219	0.351332
IGKV2D-29	0.85603	0.377377
IGKV2D-30	0.858344	0.38978
IGKV2D-40	0.846819	0.338903
IGKV3-11	0.65175	0.134734
IGKV3-15	2.22012	0.121712
IGKV3-20	0.849293	0.538289
IGKV3-7	1.82646	0.444351
IGKV3D-11	0.65175	0.134734
IGKV3D-20	0.854758	0.620003
IGKV3D-7	1.85513	0.506754
IGKV4-1	0.556152	0.0329472
IGLC1	0.825778	0.464374
IGLC2	0.903534	0.654913
IGLC3	0.903534	0.654913
IGLC6	0.863634	0.526394
IGLC7	0.863706	0.526543
IGLL1	0.845851	0.509952
IGLL5	0.753089	0.317219
IGLV3-16	0.844122	0.675703
IGLV3-21	0.679173	0.43881
IGLV3-25	0.975381	0.952204
IGLV3-27	0.975381	0.952204
IGLV3-9	0.395527	0.33365
IL16	0.874721	0.581836
IL1R2	0.98963	0.98428
IL1RAP	0.678278	0.175905
IL1RN	0.759197	0.546585
IL6ST	1.01488	0.956895
ILF3	1.69767	0.375124
ILKAP	0.390312	0.118887
ILVBL	1.90156	0.0723995
IMMT	1.07381	0.83986
INF2	0.724611	0.609029
INIP	1.31959	0.0822659
INPP4B	0.724365	0.609081
INPP5K	0.646509	0.00180771
INSR	0.684972	0.346835
INTS3	1.3117	0.614317
IPO11	1.34756	0.532274
IPO5	0.987587	0.973445
IQGAP1	0.493891	0.157037
IQGAP2	0.829957	0.55342
IRGQ	0.79624	0.22431
ISG20	0.995079	0.996162
ISLR	0.481404	0.331418
ISOC1	1.21508	0.386918
IST1	0.858026	0.661203
ITGA1	0.841207	0.556417
ITGA2B	4.70931	0.0690065
ITGA5	2.04882	0.247216
ITGA6	1.25695	0.430739
ITGAM	1.06896	0.860344
ITGAV	1.01874	0.971785
ITGB1	0.973481	0.933759
ITGB3	0.698185	0.488576
ITGB4	0.895223	0.726224
ITIH1	1.01966	0.826817
ITIH2	0.979682	0.800349
ITIH3	1.22821	0.0377477
ITIH4	1.00112	0.986182
ITIH5	1.06258	0.643201
ITLN1	1.64409	0.388781
ITLN2	1.89132	0.326322
ITPR3	1.40606	0.603937
ITSN2	1.57681	0.205047
IVD	1.08666	0.826373
JCHAIN	0.854743	0.583089
JUP	1.02421	0.912266
KANK2	1.18382	0.613756
KCTD12	0.899254	0.80239
KDM1A	0.418351	0.166951
KHDRBS1	1.17469	0.692326
KHDRBS3	0.0156755	0.0525377
KHSRP	0.620901	0.319081
KIF13B	1.83275	0.0764682
KIF5B	0.909299	0.806416
KIF5C	1.71608	0.0505804
KIT	1.30039	0.551581
KLHL36	0.427031	0.453234
KLK1	1.49695	0.355368
KLK12	0.715999	0.0912913
KLK13	0.711226	0.0828747
KLK6	0.775365	0.529275
KLK7	0.711226	0.0828747
KLKB1	0.839451	0.101659
KNG1	0.922325	0.0559294
KPNB1	1.40999	0.0680341
KRT1	1.07307	0.588381
KRT10	0.989998	0.948742
KRT12	0.68734	0.362383
KRT13	1.1159	0.463356
KRT14	0.963525	0.64143
KRT15	1.19681	0.0871484
KRT16	1.10202	0.672511
KRT17	0.922998	0.762115
KRT18	1.11789	0.503768
KRT19	0.85383	0.453688
KRT2	1.07292	0.580687
KRT20	1.30172	0.744465
KRT24	0.884712	0.563678
KRT25	0.814952	0.544074
KRT26	0.875029	0.761584
KRT27	0.814952	0.544074
KRT28	0.84054	0.376117
KRT3	1.1394	0.261757
KRT31	0.68458	0.443892
KRT32	1.02582	0.91284
KRT33B	0.685324	0.445499
KRT35	0.978577	0.923792
KRT36	1.25278	0.40126
KRT37	1.02582	0.912842
KRT38	1.02582	0.912842
KRT4	0.897318	0.73792
KRT5	1.03729	0.754428
KRT6A	1.12088	0.260131
KRT6B	1.01187	0.923407
KRT6C	1.13081	0.242406
KRT7	0.954174	0.643095
KRT71	0.458347	0.166338
KRT72	0.631215	0.19037
KRT73	1.17428	0.625796
KRT74	0.458481	0.166423
KRT75	1.10686	0.343276
KRT76	1.12354	0.321775
KRT77	0.864148	0.57587
KRT78	1.03405	0.759105
KRT79	1.0211	0.858086
KRT8	1.05044	0.764492
KRT81	1.5237	0.35052
KRT83	1.5807	0.318022
KRT84	1.13789	0.25218
KRT85	1.58388	0.316397
KRT86	1.52369	0.350523
KRT9	0.792217	0.150226
KTN1	0.678766	0.150875
L1CAM	0.758168	0.178571
LACTB	1.62283	0.133273
LALBA	0.348027	0.229364
LAMA2	4.12945	0.0774512
LAMA4	0.550137	0.199181
LAMA5	1.64399	0.275904
LAMB1	0.694159	0.265512
LAMB2	0.976315	0.928297
LAMB3	0.837091	0.586466
LAMC1	1.30167	0.224151
LAMC2	7.16824	0.0482703
LAMP2	0.759036	0.0146078
LAP3	0.776927	0.811493
LBP	2.09966	0.0554343
LCAT	1.01232	0.895012
LCN2	0.644921	0.188587
LCP1	1.07583	0.614372
LDHA	0.81178	0.0913438
LDHB	0.979764	0.920614
LEFTY2	0.841016	0.900481
LEMD2	1.64936	0.63182
LEO1	0.00556972	0.158904
LEPR	1.22442	0.654725
LGALS1	0.764319	0.566751
LGALS3	1.25615	0.293406
LGALS3BP	1.02168	0.906678
LGALS4	1.02404	0.962056
LGALS7	0.517187	0.0602145
LGALS9	18.149	0.167095
LHPP	4.35757	0.331494
LIG4	0.919422	0.866033
LILRA3	1.29642	0.515397
LILRA4	0.938562	0.915211
LILRA6	0.938556	0.915205
LILRB2	0.938571	0.91522
LILRB3	0.711215	0.431157
LIMA1	1.83041	0.353211
LIN7C	0.806582	0.267219
LIPE	1.49859	0.13815
LMAN1	1.22003	0.252019
LMAN2	0.832021	0.410739
LMNA	2.03552	0.0339927
LMNB1	0.711558	0.463627
LMNB2	0.974875	0.922379
LOC102724334	0.874357	0.373479
LONP1	2.47814	0.305966
LONP2	0.823385	0.202256
LOXL2	0.557535	0.54878
LPA	1.01569	0.868646
LPCAT1	2.27761	0.345818
LRBA	0.550469	0.338876
LRG1	1.46541	0.00116551
LRP1	0.886072	0.426824
LRP2	1.04904	0.930214
LRPPRC	0.978283	0.945017
LRRC1	2.36197	0.283053
LRRC15	1.6522	0.371757
LRRFIP1	1.59145	0.46845
LRRFIP2	0.000220163	0.301334
LSAMP	0.898916	0.454416
LSS	0.645297	0.491497
LTA4H	0.709154	0.602796
LTF	0.304297	0.00626315
LUC7L	1.40374	0.673253
LUM	0.890922	0.289905
LYPLA2	0.443282	0.497139
LYSMD3	0.000785708	0.24332
LYVE1	0.83936	0.240657
LYZ	0.821704	0.199897
MACF1	0.39855	0.0151288
MADD	0.710057	0.745601
MAGI1	1.33929	0.583333
MAGI2	0.0285509	0.321019
MAK16	0.469151	0.106512
MAN1A1	1.2153	0.157816
MAN2A1	0.443834	0.0110266
MAN2A2	3.33025	0.046172
MAN2B1	1.53087	0.409725
MANBA	0.965397	0.83582
MAOB	0.934567	0.845734
MAP4	1.51391	0.193407
MAP6	0.985031	0.984796
MAP7D1	2.67938	0.0602423
MAPK1	0.585184	0.23844
MAPK14	1.43276	0.599376
MAPK3	1.11126	0.774356
MAPK4	1.04208	0.95706
MAPK6	1.04207	0.957064
MAPRE1	0.254995	0.0913459
MARCKS	0.829439	0.422369
MARS1	0.740955	0.623023
MASP1	0.975131	0.829098
MASP2	0.947529	0.797698
MAST1	0.419664	0.0216603
MAST2	0.41534	0.0192415
MAST3	0.423434	0.0224186
MAST4	0.419725	0.0216666
MASTL	0.419371	0.0214921
MAT2A	0.94632	0.880074
MAT2B	1.30184	0.564579
MB	0.222921	0.0495592
MBL2	1.09331	0.533186
MBOAT2	0.000511341	0.321019
MCAM	1.02813	0.904481
MCM3	1.00495	0.995345
MCM5	0.974145	0.948974
MCM7	0.706844	0.647311
MCTS1	7.97001	0.369396
MDH1	0.916775	0.728186
MDH2	1.05337	0.854988
ME2	0.698243	0.271282
ME3	0.0607873	0.186302
MED16	1.0411	0.806711
MED30	0.986105	0.863999
MEGF8	0.698856	0.22675
MERTK	0.97883	0.928451
MET	0.607313	0.187149
METAP1	0.842231	0.199628
METTL17	0.488419	0.279544
METTL18	0.886571	0.366902
MFGE8	1.17875	0.286358
MGAT2	0.467638	0.317807
MGLL	1.03996	0.933447
MIA3	0.374803	0.351674
MINPP1	0.73416	0.49618
MLEC	0.782357	0.783406
MME	1.03689	0.865961
MMP10	1.89735	0.0884152
MMP2	0.876153	0.636355
MMP3	0.614986	0.106384
MMP8	0.778548	0.506359
MMRN1	0.631761	0.378512
MMRN2	0.563192	0.0719431
MMS19	1.342	0.142593
MMUT	1.39057	0.407361
MNDA	0.709948	0.108913
MOB1A	0.725618	0.621279
MOB1B	0.725618	0.621279
MOB4	0.684193	0.311441
MON2	0.0250043	0.0228495
MORC3	0.716716	0.206127
MPI	0.940709	0.780788
MPO	0.989034	0.949759
MRC1	1.08798	0.710018
MROH1	40.3666	0.276401
MRPL1	1.24891	0.426638
MRPL45	0.373963	0.196575
MRPS2	1.00825	0.974728
MRPS23	0.151396	0.312827
MRPS31	0.794389	0.429334
MRPS7	0.940002	0.953273
MRTO4	0.0012423	0.31251
MSH2	0.925803	0.674207
MSH3	0.424319	0.0290237
MSI1	0.290766	0.163391
MSL1	7.72075	0.299869
MSN	0.859379	0.658958
MST1	0.922653	0.149195
MST1L	0.909657	0.14467
MTA2	0.441047	0.437518
MTHFD1	1.90589	0.111508
MTHFS	1.40143	0.723448
MTM1	0.615079	0.366051
MTMR10	2.7852	0.378023
MTOR	1.30749	0.147103
MTPN	1.63692	0.0831223
MTREX	0.784062	0.643271
MTX1	0.439554	0.420419
MUC1	0.223977	0.00295882
MUC2	0.183891	0.00577574
MUC5B	0.937134	0.933447
MVB12B	1.09803	0.823473
MVP	0.55207	0.112821
MX1	0.324494	0.0256812
MXRA5	1.35666	0.409804
MYH1	1.01216	0.921939
MYH10	0.719816	0.270099
MYH11	0.897825	0.63741
MYH14	0.909915	0.763803
MYH2	1.01238	0.920546
MYH3	1.01239	0.920441
MYH4	1.01206	0.922611
MYH6	1.02059	0.867657
MYH7	1.02108	0.86449
MYH7B	1.01882	0.879164
MYH8	1.0188	0.879269
MYH9	1.50952	0.0433249
MYL12A	1.0835	0.663995
MYL12B	1.04077	0.824867
MYL9	1.00371	0.988522
MYLK	0.521012	0.263675
MYO18A	1.07202	0.878643
MYO1A	4.2609	0.27725
MYO1B	1.3011	0.477414
MYO1C	0.71849	0.245126
MYO1E	1.31841	0.116539
MYO1F	1.12859	0.781539
MYO1G	5.82594	0.0773183
MYO6	1.16599	0.318341
MYOC	1.03182	0.957742
MYOF	1.38668	0.0607672
MZT2A	0.749176	0.709583
MZT2B	0.749173	0.709583
NADSYN1	0.000108542	0.0587946
NAGLU	0.503317	0.0205812
NANS	0.96529	0.917562
NAP1L1	1.21068	0.282601
NAT10	1.32536	0.583784
NAXD	1.11556	0.663495
NCAM1	1.60391	0.423198
NCAN	0.817633	0.533892
NCCRP1	1.18958	0.73567
NCKAP1	0.846631	0.387915
NCKAP1L	25.4393	0.243541
NCL	0.724281	0.59688
NDE1	3.20936	0.491356
NDRG1	3.45176	0.299709
NDUFA10	0.714179	0.367224
NDUFA4	0.381298	0.0321757
NDUFA8	5.97331	0.33679
NDUFAF3	1.25692	0.0324155
NDUFB4	0.9665	0.630787
NDUFB5	0.448782	0.394607
NDUFS2	1.31321	0.596574
NDUFS3	0.324397	0.0415917
NDUFS6	1.53571	0.368281
NDUFS8	1.02504	0.962044
NEBL	0.659445	0.17712
NECTIN3	0.956527	0.944069
NEFM	0.747405	0.0667709
NEGR1	0.488739	0.16716
NELFA	2.12109	0.228183
NEO1	0.484421	0.000303877
NES	0.664382	0.233971
NFKB2	0.829266	0.506927
NFXL1	2.42235	0.320185
NHLRC2	1.51912	0.0698953
NIBAN1	1.16404	0.647876
NID1	0.780112	0.309458
NID2	0.497848	0.157785
NINJ2	2.80721	0.35155
NIT2	0.640775	0.362914
NME1	0.967938	0.933465
NME2	0.986015	0.947173
NME2P1	0.91808	0.75315
NMT1	1.59017	0.61226
NONO	0.683071	0.495428
NOP58	1.3541	0.605067
NPEPPS	0.875299	0.778119
NPLOC4	0.867371	0.845787
NPM1	0.902403	0.584487
NPNT	1.01677	0.989289
NRCAM	0.957559	0.930702
NRP1	1.38491	0.184479
NRP2	1.24025	0.659221
NSF	0.819553	0.475599
NSMCE3	1.21245	0.891912
NT5C	0.548479	0.0808506
NT5C3B	0.876722	0.470487
NT5E	1.40898	0.456148
NUCB1	1.00898	0.956902
NUDCD2	1.03138	0.963202
NUDT14	0.13285	0.174019
NUDT5	0.506348	0.0949353
NUDT9	0.680096	0.596745
NUP133	0.93325	0.772272
NUP205	1.03627	0.931352
NUP43	1.23908	0.608072
NUP98	0.757265	0.0509902
NUTF2	2.17704	0.415712
OAF	1.13601	0.420622
OAS2	0.471956	0.104983
OGN	0.286484	0.103618
OIT3	0.844385	0.560412
OLA1	1.258	0.840045
OLFM1	0.797506	0.0230552
OLFM4	0.654663	0.291673
OMD	1.07927	0.72785
ORM1	1.25376	0.193158
ORM2	0.933246	0.720599
OSBPL10	0.168615	0.104787
OSCAR	1.16826	0.799694
OSMR	1.18089	0.567943
OSTF1	0.860319	0.809615
OTUB1	0.551386	0.473548
OXCT1	1.414	0.1574
P2RX4	0.000146112	0.00708126
P3H1	0.683157	0.194068
P4HA2	3.54178	0.229399
P4HB	0.82099	0.39042
PABPC1	0.496489	0.0296007
PABPC3	0.254584	0.0100205
PABPC4	0.402327	0.0104058
PACS2	1.28054	0.760365
PADI2	0.775839	0.31235
PAFAH1B1	0.230052	0.0772435
PAICS	0.754433	0.174886
PAK2	0.427633	0.181962
PALM2AKAP2	0.22533	0.202038
PANK4	0.935042	0.762683
PAPSS1	1.13543	0.828722
PARD3	0.769155	0.243783
PARK7	0.828367	0.590359
PARP1	2.08216	0.197429
PARP10	0.192967	0.161146
PARP14	0.649307	0.303464
PARP9	0.975973	0.96779
PARVA	4.52526	0.226301
PARVB	1.83951	0.481396
PBLD	0.960453	0.896843
PC	0.0974658	0.0936834
PCBP1	1.41445	0.0642185
PCBP2	0.894918	0.299022
PCBP3	1.20698	0.317397
PCCA	1.17818	0.750881
PCCB	0.964173	0.869071
PCF11	0.146238	0.0393406
PCK1	0.837715	0.250715
PCK2	0.966315	0.941263
PCNP	2.53244	0.246686
PCOLCE	0.731739	0.0106496
PCSK1N	1.12219	0.798601
PCSK9	1.72831	0.0473364
PCYOX1	0.65319	0.0020834
PCYT1A	1.11592	0.884249
PCYT1B	3.01091	0.45535
PDCD4	1.10949	0.545799
PDCD5	0.312091	0.245944
PDCD6IP	0.924714	0.742532
PDGFRB	0.968382	0.964985
PDHA1	0.463471	0.0887509
PDHB	1.38478	0.146081
PDIA3	0.610478	0.104654
PDIA4	1.17381	0.772975
PDIA6	8.6376	0.221398
PDK3	0.693553	0.097882
PDLIM1	5.0548	0.053964
PDLIM2	0.350474	0.290275
PDLIM5	0.72065	0.443381
PDXDC1	0.0960487	0.115699
PDXK	0.186594	0.0902219
PEA15	1.0625	0.919608
PEBP1	1.09981	0.798014
PEBP4	0.647044	0.380498
PELP1	0.910862	0.882446
PEPD	0.780184	0.295026
PEX5	3.65514	0.455377
PF4	0.621036	0.176907
PF4V1	0.621036	0.176907
PFDN2	0.841879	0.716796
PFDN6	4.83868e-05	0.304649
PFKL	1.31245	0.655709
PFKP	1.03607	0.929434
PFN1	1.21481	0.335087
PGAM1	0.899826	0.699372
PGAM2	0.90738	0.779118
PGAM4	0.640172	0.104311
PGD	0.822274	0.40997
PGK1	0.772043	0.310396
PGK2	1.15044	0.648161
PGLS	0.190931	0.236116
PGLYRP1	1.50837	0.539182
PGLYRP2	0.894837	0.260908
PGM1	0.901917	0.756307
PGM2	0.630077	0.119354
PGPEP1	1.37473	0.366784
PHB	2.38568	0.0868516
PHB2	0.355165	0.022286
PHGDH	0.879767	0.634128
PHPT1	2.91264	0.214427
PI16	0.81702	0.155031
PI4KA	1.92922	0.3384
PICALM	0.862274	0.637374
PIGO	0.000187428	0.0560273
PIGR	0.754716	0.220938
PIH1D1	0.482674	0.326293
PIK3R1	0.144475	0.386803
PIK3R2	61.7411	0.195741
PIK3R3	0.258531	0.229429
PIN4	6.22805	0.106747
PITPNB	0.191098	0.343913
PITPNM2	1.30002	0.53717
PITRM1	0.873237	0.747309
PKM	0.933237	0.719141
PKN2	10.1311	0.183444
PKP3	1.31091	0.651369
PLA2G7	1.16632	0.49854
PLAA	1.20321	0.312871
PLBD2	1.13766	0.357024
PLCB4	2.89155	0.170838
PLCG1	5.5779	0.104751
PLD3	1.53254	0.512156
PLEC	1.1103	0.655171
PLEK	0.640442	0.203066
PLEKHM1	1.12576	0.683518
PLG	0.85597	0.00890941
PLGLA	0.777089	0.0422721
PLGLB1	1.44977	0.546614
PLIN3	0.606737	0.195626
PLOD1	1.10449	0.923734
PLOD2	0.36289	0.102794
PLOD3	0.720732	0.695825
PLPBP	0.606834	0.34229
PLS1	1.04184	0.900724
PLS3	1.40611	0.203753
PLTP	0.542521	0.00150941
PLVAP	6.00333	0.395298
PLXDC2	1.44827	0.546655
PLXNA1	0.00808887	0.301711
PLXNA4	0.0369659	0.0627413
PLXNB1	1.22409	0.723421
PMM1	0.000329507	0.102547
PMM2	1.40311	0.653445
PMVK	1.29371	0.303461
PNLIP	0.310107	0.12213
PNP	1.1251	0.443457
PODXL	0.841723	0.204372
POF1B	1.01039	0.978306
POLR1E	0.348124	0.162304
POLR2A	1.03766	0.773771
POLR2B	1.34421	0.48744
POLR2C	0.212511	0.303159
POLR2H	1.03752	0.960538
POLRMT	0.00357902	0.0481591
PON1	0.841611	0.0392531
PON3	1.86912	0.0838035
POSTN	0.922396	0.548782
POTEE	1.75741	0.11053
POTEF	1.79765	0.101098
POTEI	1.61871	0.113949
POTEJ	1.61796	0.0980761
POTEKP	1.73952	0.0989187
PPA1	0.969026	0.899931
PPBP	1.14001	0.54787
PPIA	0.834214	0.178426
PPIB	0.68896	0.236993
PPIC	3.06783	0.254308
PPM1A	0.910684	0.876528
PPM1F	0.275352	0.0509438
PPM1G	0.4089	0.19845
PPOX	0.957412	0.847806
PPP1CA	0.665646	0.00603255
PPP1CB	0.580357	0.000342521
PPP1CC	0.668552	0.00656047
PPP1R7	1.02756	0.963195
PPP2R1A	0.765457	0.633949
PPP2R1B	1.04392	0.931125
PPP3CA	0.888027	0.878528
PPP3CB	0.813469	0.389222
PPP6R1	2.55706	0.526684
PPT1	0.765072	0.805647
PPWD1	3.23415	0.0439178
PRADC1	1.90633	0.55451
PRAP1	0.999819	0.999574
PRCP	1.0663	0.891228
PRDX1	2.60003	0.124261
PRDX2	1.11233	0.643506
PRDX5	1.90843	0.382738
PRDX6	0.933843	0.832879
PRELP	0.765934	0.200176
PREP	1.39109	0.450451
PRG4	1.59604	0.0326075
PRKACA	1.40709	0.5803
PRKACB	0.849944	0.682595
PRKAR1A	2.48425	0.238829
PRKCD	0.126727	0.331944
PRKCE	0.191129	0.300936
PRKCSH	2.10808	0.0394009
PRKDC	0.579498	0.0168641
PRKRA	1.01954	0.942511
PRMT1	0.337294	0.2435
PRMT5	4.41311	0.405199
PROC	1.02924	0.730486
PROCR	1.39691	0.0937472
PROS1	0.97251	0.774065
PROZ	0.781984	0.0234773
PRPF19	0.657071	0.0587053
PRPF38A	0.000129317	0.259052
PRPF8	1.07568	0.796651
PRPH	0.747587	0.251288
PRPSAP1	1.95532	0.396294
PRPSAP2	0.80194	0.348444
PRSS1	0.989594	0.897742
PRSS2	1.04603	0.601573
PRSS3	1.03735	0.637106
PRSS3P2	1.04333	0.628772
PRUNE1	0.372763	0.31363
PSEN1	1.05728	0.793552
PSIP1	1.38371	0.0649838
PSMA1	1.44282	0.384268
PSMA2	1.50972	0.645359
PSMA3	2.37959	0.396594
PSMA4	0.687359	0.61974
PSMA5	0.592515	0.172053
PSMA6	2.01691	0.237217
PSMB1	1.33329	0.601434
PSMB10	1.2169	0.258541
PSMB5	1.43422	0.658011
PSMB8	1.28674	0.734689
PSMC2	1.48005	0.0109766
PSMC5	1.03538	0.899411
PSMD3	1.66713	0.126157
PSMD5	0.703241	0.494547
PSME1	0.604888	0.594116
PSME2	0.669209	0.48185
PSME3	1.31196	0.347212
PSME4	0.327366	0.162717
PSPC1	0.621457	0.172845
PTBP1	1.50496	0.501079
PTGDS	0.957083	0.723536
PTGFRN	0.833835	0.662865
PTK2	0.780962	0.534849
PTMA	0.757866	0.442373
PTPA	1.05813	0.848491
PTPN12	1.87134	0.513052
PTPN23	0.597977	0.311966
PTPN6	1.31523	0.42692
PTPRD	1.36197	0.599242
PTPRF	1.16803	0.79185
PTPRG	0.854411	0.270796
PTPRJ	0.839903	0.457698
PTPRM	0.983134	0.969664
PTPRS	1.05991	0.783457
PTRH2	2.3714	0.393232
PUDP	2.27696	0.208368
PUM3	1.89081	0.402883
PVR	1.12833	0.407815
PWP2	0.580171	0.102219
PXDN	1.40107	0.0576443
PYCR1	1.04761	0.904891
PYGB	0.509093	0.263516
PYGL	1.02748	0.914521
PZP	0.867415	0.47176
QSOX1	0.832069	0.357979
RAB10	0.878499	0.725892
RAB11FIP5	1.00589	0.991512
RAB3GAP1	0.347381	0.156173
RAB4A	0.737666	0.53599
RAB6A	2.09151	0.562213
RABEP2	1.05217	0.797721
RABGGTA	1.43829	0.00155273
RACK1	1.00091	0.994357
RAD23A	1.05815	0.889901
RAD50	1.85529	0.227105
RALGAPA2	0.961017	0.859949
RALY	0.738754	0.316788
RANBP6	0.971753	0.921186
RAP1A	0.701162	0.0339191
RAP1B	0.709018	0.0380938
RARRES2	1.34852	0.460082
RARS1	1.42486	0.431941
RASIP1	2.16138	0.446916
RBM10	3.00596	0.199279
RBM12	0.0719243	0.321052
RBM12B	0.897984	0.72532
RBM14	2.0476	0.188507
RBM19	0.519694	0.464477
RBM6	2.45374	0.196012
RBMX	0.559167	0.202064
RBMXL1	0.589944	0.289194
RBP4	0.784678	0.0158806
RCN1	1.43627	0.00518805
RCOR2	0.775278	0.484737
RDH10	0.95669	0.880592
RDX	1.41806	0.280249
REG1A	2.17369	0.514544
REG1B	1.89128	0.582947
REG3A	1.81721	0.489569
RETSAT	0.701799	0.35775
RFC5	0.600279	0.491249
RFTN1	0.791744	0.526626
RILP	0.820863	0.762199
RNASE2	1.20741	0.620853
RNASE4	1.06408	0.872859
RNASEH2C	3.57561	0.0579263
RNASET2	1.83113	0.395391
RNF2	1.15305	0.820081
RNF40	1.21615	0.763615
RNH1	1.12975	0.815435
RNPEP	0.676262	0.0943189
ROBO1	0.783882	0.548663
ROBO4	1.28715	0.458353
ROCK2	2.12775	0.335796
RP2	1.44628	0.380168
RPA1	3.04687	0.360962
RPA3	1.50674e-05	0.272211
RPAP3	1.25661	0.220952
RPL11	16.6613	0.347814
RPL13	0.25279	0.061554
RPL15	0.856475	0.660168
RPL19	0.987508	0.980855
RPL23	1.1463	0.323922
RPL28	0.297177	0.0728032
RPL3	1.2274	0.419798
RPL30	1.11835	0.817176
RPL35	1.0669	0.918346
RPL3L	0.934857	0.57518
RPL5	0.401873	0.21213
RPL7	1.79355	0.198564
RPLP0	0.652759	0.612215
RPLP0P6	1.55292	0.602655
RPLP1	2.52048	0.358784
RPN1	0.951219	0.919463
RPN2	0.702614	0.516425
RPRD1B	1.76665	0.175094
RPS11	0.383485	0.165646
RPS15	1.80561	0.188205
RPS17	0.587339	0.454202
RPS18	1.57365	0.205968
RPS19	0.988791	0.958635
RPS24	0.0110114	0.10046
RPS27A	0.762982	0.23859
RPS3	1.00037	0.999286
RPS4X	0.561791	0.084495
RPS6	0.359799	0.0329565
RPS6KA1	0.424096	0.0222196
RPS6KA3	0.426535	0.0216022
RPS6KA6	0.419404	0.0215352
RPS7	0.554683	0.516507
RPSA	0.94402	0.841991
RRBP1	0.881503	0.534647
RSF1	3.09456	0.379278
RTCB	3.79641	0.137394
RTN4RL2	0.84129	0.634131
S100A1	0.553898	0.579623
S100A11	0.923441	0.85203
S100A12	0.958656	0.881604
S100A16	0.375508	0.23237
S100A4	0.998809	0.99555
S100A7	2.03028	0.505798
S100A7A	0.730815	0.516607
S100A8	0.876196	0.544955
S100A9	0.918497	0.695111
S100P	0.919743	0.720294
SAA1	3.03772	0.00973968
SAA2	3.74034	0.0122345
SAA4	1.14204	0.177363
SAMD1	1.34716	0.335567
SAMHD1	1.03437	0.850222
SARS2	0.890152	0.675016
SBF1	0.36195	0.0331503
SBSN	0.953445	0.909602
SCCPDH	0.660819	0.399912
SCFD1	1.09767	0.821243
SCIN	0.618825	0.0491561
SCPEP1	1.17837	0.746651
SCRIB	1.11402	0.507728
SCRN1	1.4511	0.309502
SCYL1	0.887792	0.869512
SDC4	0.228619	0.199739
SEC13	0.0692309	0.290385
SEC16A	0.607641	0.326209
SEC24C	1.48055	0.41597
SEC62	0.692037	0.354171
SEC63	3.37016	0.218806
SECTM1	0.31678	0.12698
SELENBP1	0.828541	0.286145
SELENOH	0.823305	0.777934
SELENOP	0.809665	0.00647758
SELENOT	4.38754	0.448942
SELL	0.965518	0.704459
SEMG1	0.694259	0.618941
SEPHS2	0.883116	0.62856
SEPTIN1	1.0208	0.980394
SEPTIN10	0.435234	0.159889
SEPTIN11	7.10489	0.210954
SEPTIN2	1.60497	0.042754
SEPTIN6	0.972254	0.951638
SEPTIN7	1.28503	0.47885
SEPTIN8	0.537624	0.474882
SERPINA1	1.19556	0.0727923
SERPINA10	1.30662	0.0213777
SERPINA11	2.92223	0.178424
SERPINA3	1.28059	0.000490454
SERPINA4	0.870323	0.165801
SERPINA5	1.18717	0.173228
SERPINA6	0.954646	0.447814
SERPINA7	0.900364	0.0601924
SERPINB1	1.03658	0.906381
SERPINB10	4.11274	0.315059
SERPINB12	0.534857	0.000984352
SERPINB3	0.854137	0.703675
SERPINB4	0.824727	0.647476
SERPINB6	0.948131	0.841937
SERPINB8	1.15683	0.7308
SERPINB9	0.978484	0.957839
SERPINC1	0.882088	0.0342064
SERPIND1	1.05472	0.672467
SERPINE1	0.520393	0.0028231
SERPINE2	0.882602	0.562538
SERPINF1	1.00496	0.928882
SERPINF2	1.0048	0.940466
SERPING1	1.03692	0.551072
SERPINH1	0.871785	0.637262
SERPINI2	0.982483	0.964838
SF1	0.756065	0.788169
SF3A1	1.45885	0.0445399
SF3A2	2.3178	0.141703
SF3A3	0.917767	0.803932
SF3B1	1.15614	0.71831
SF3B2	0.675889	0.00471524
SF3B3	1.01256	0.975295
SF3B4	0.997784	0.994269
SFN	0.22959	0.1447
SFPQ	0.990206	0.972725
SFTPB	1.53185	0.292779
SFXN1	0.715878	0.670681
SGTA	0.223385	0.210006
SH3BGRL3	1.44626	0.535991
SH3BP1	0.759585	0.654928
SH3GL1	23.0811	0.198168
SH3KBP1	0.83266	0.0955815
SHBG	0.968776	0.842326
SHMT1	0.616183	0.103109
SHOC2	0.571261	0.390663
SIAE	1.30553	0.445237
SIRPA	0.944286	0.904616
SIRPB1	0.43388	0.00662416
SIX5	12.2192	0.347204
SKIV2L	1.72711	0.372251
SLC12A2	1.02248	0.966728
SLC12A4	0.0114541	0.321019
SLC12A7	0.732356	0.529018
SLC15A2	0.159791	0.321019
SLC22A18	2.9636	0.342557
SLC25A1	0.50756	0.194409
SLC25A12	0.92255	0.875347
SLC25A13	0.743208	0.344022
SLC25A3	0.959182	0.824813
SLC2A1	0.762672	0.698534
SLC33A1	1.55635	0.527803
SLC35B2	0.607629	0.259517
SLC38A10	1.15147	0.534102
SLC3A2	1.15496	0.70247
SLC41A3	0.303387	0.260756
SLC4A1	1.03093	0.925036
SLC9A3R2	0.588469	0.456555
SLK	0.843361	0.819473
SMARCA1	0.894719	0.525605
SMARCA2	1.05134	0.653187
SMARCA4	1.0567	0.62235
SMARCA5	0.696092	0.0632281
SMC1A	0.608077	0.166047
SMC2	1.32229	0.338473
SMC3	0.763958	0.423937
SMN1	4.71025	0.219638
SMNDC1	0.53465	0.246456
SMPDL3B	4.15609	0.392273
SNAP25	0.721265	0.717082
SNAP91	1.2885	0.381537
SNCA	1.76974	0.211976
SNCB	1.38559	0.360449
SND1	0.729455	0.537645
SNRNP200	1.52543	0.527859
SNRNP70	0.840445	0.832158
SNRPA1	5.60916	0.272468
SNRPD1	0.746554	0.616243
SNX30	1.05896	0.580649
SNX4	1.45178	0.61669
SNX8	1.95579	0.384144
SOD1	0.728252	0.189945
SOD2	0.803201	0.377041
SOD3	0.898017	0.465031
SON	0.845189	0.889919
SORBS1	1.06518	0.88123
SORD	0.687659	0.533165
SORT1	0.341409	0.0173786
SPARC	0.808863	0.263195
SPARCL1	0.756306	0.0956862
SPCS3	0.194712	0.0657215
SPG11	0.903745	0.289956
SPN	1.86675	0.27201
SPP1	2.1185	0.152114
SPP2	0.427232	0.00994664
SPTA1	0.745874	0.182214
SPTAN1	0.939255	0.791532
SPTB	0.864048	0.530541
SPTBN1	0.577255	0.0606834
SPTBN2	1.1401	0.758649
SRCAP	1.22552	0.696665
SRGAP1	0.352784	0.280266
SRGAP2	8.92118	0.202311
SRGAP2B	3.74094	0.422038
SRGAP2C	3.74017	0.422036
SRGN	1.23829	0.369693
SRP54	13.6648	0.329549
SRP72	1.73255	0.321697
SRRM2	0.457974	0.026982
SRSF11	1.2638	0.66138
SRSF2	0.504462	0.153079
SRSF3	0.0654032	0.032194
SSBP1	0.273771	0.419213
SSC5D	0.803883	0.791892
STAP2	0.0870641	0.0538421
STARD10	1.8737	0.634327
STAT1	0.659856	0.458956
STAT2	0.199935	0.0209852
STAU2	0.604276	0.318418
STING1	0.611914	0.140194
STIP1	1.907	0.438195
STK39	0.714823	0.600815
STMN1	1.12415	0.798172
STOML2	1.22326	0.427723
STRN3	0.539628	0.28889
STT3A	1.06379	0.824418
STX2	2.68152	0.394367
STX3	1.53974	0.508682
STX8	1.59191	0.366306
STXBP3	0.552759	0.0179702
STXBP5	0.977807	0.682577
SUCLG1	1.44864	0.45325
SUCLG2	1.2538	0.370691
SUGT1	1.4308	0.278197
SUN2	1.06764	0.93343
SUOX	0.161017	0.373326
SUPT6H	0.561527	0.328572
SUSD2	1.63149	0.478836
SYAP1	0.000137782	0.10042
SYNCRIP	0.625528	0.259067
SYNE1	1.09175	0.797255
SYNE2	0.98873	0.987983
SYNM	2.10403	0.187272
SYNPO2	1.27555	0.257655
SYTL2	0.966834	0.858567
TAGLN	1.12701	0.687141
TAGLN2	1.48485	0.104122
TALDO1	1.13301	0.552801
TAMM41	0.613011	0.627279
TAP1	1.2855	0.560347
TARDBP	1.12874	0.696975
[truncated: 6,510 more rows]

## Sheet: 7H
Symbol	Count
AADAC	637
AASS	657
ARPC3	611
CDK5	955
CORO7	525
CTNNBL1	389
ECH1	425
ELOB	660
FOXK1	717
FUT6	716
G3BP2	710
GAP43	478
GPD1L	610
HPCA	506
IGKV6D-21	790
IGKV6D-41	790
INPP5D	671
INTS7	496
MAPK8	551
NAAA	499
NUDCD3	474
P2RX4	444
RAVER1	538
RRAD	371
SETSIP	548
SIN3A	500
SNAPIN	556
STAT2	565
TRA2A	463
UCHL1	487
VPS53	666
WDR37	395

## Sheet: 7K
Symbol	Exp	CDK5	Expression
ADD1	Exp072645	0	0
ADD1	Exp072647	0	4.71593
ADD1	Exp074392	0	1.72844
ADD1	Exp074394	0	-0.358935
ADD1	Exp076155	0	3.10227
ADD1	Exp076157	0	1.12976
ADD1	Exp076164	-4.40852	-1.20223
ADD1	Exp076166	-3.50375	-0.745583
ADD1	Exp072624	0	-5.43704
ADD1	Exp076171	0	4.38001
ADD1	Exp076178	0	5.25793
ADD1	Exp076183	0	-0.474417
ADD1	Exp076185	0	3.3549
ADD1	Exp076187	0	-0.177592
ADD1	Exp072626	0	5.0222
ADD1	Exp076191	3.31686	-1.15383
ADD1	Exp076195	0	5.21331
ADD1	Exp076200	0	-4.91566
ADD1	Exp076202	0	-4.77433
ADD1	Exp082884	-1.9168	4.38593
ADD1	Exp072628	0	0
ADD1	Exp082890	-1.63262	-5.05009
ADD1	Exp082906	0	0
ADD1	Exp082912	0	1.92082
ADD1	Exp082915	-5.17905	5.28299
ADD1	Exp082921	-3.96077	0
ADD1	Exp072630	0	-4.51833
ADD2	Exp072645	0	0
ADD2	Exp072647	0	-5.06542
ADD2	Exp074392	0	0
ADD2	Exp074394	0	4.35271
ADD2	Exp076155	0	0
ADD2	Exp076157	0	-4.0602
ADD2	Exp076164	-4.40852	0
ADD2	Exp076166	-3.50375	0
ADD2	Exp072624	0	0
ADD2	Exp076171	0	3.89639
ADD2	Exp076178	0	4.06008
ADD2	Exp076183	0	0.0896171
ADD2	Exp076185	0	-2.84579
ADD2	Exp076187	0	-4.20911
ADD2	Exp072626	0	0
ADD2	Exp076191	3.31686	3.67727
ADD2	Exp076195	0	-1.35659
ADD2	Exp076200	0	-4.30105
ADD2	Exp076202	0	0
ADD2	Exp082884	-1.9168	4.29878
ADD2	Exp072628	0	-4.55348
ADD2	Exp082890	-1.63262	0
ADD2	Exp082906	0	3.899
ADD2	Exp082912	0	1.02724
ADD2	Exp082915	-5.17905	4.05493
ADD2	Exp082921	-3.96077	-0.107954
ADD2	Exp072630	0	0
APEX1	Exp072645	0	-0.0164317
APEX1	Exp072647	0	-5.85606
APEX1	Exp074392	0	-0.0862483
APEX1	Exp074394	0	-1.13634
APEX1	Exp076155	0	0.954873
APEX1	Exp076157	0	0.112708
APEX1	Exp076164	-4.40852	1.76732
APEX1	Exp076166	-3.50375	0.695149
APEX1	Exp072624	0	-5.96877
APEX1	Exp076171	0	-0.417262
APEX1	Exp076178	0	-0.231747
APEX1	Exp076183	0	4.73823
APEX1	Exp076185	0	5.82782
APEX1	Exp076187	0	4.63748
APEX1	Exp072626	0	-0.604611
APEX1	Exp076191	3.31686	-0.0638735
APEX1	Exp076195	0	0.0852066
APEX1	Exp076200	0	1.41449
APEX1	Exp076202	0	-4.58477
APEX1	Exp082884	-1.9168	4.15823
APEX1	Exp072628	0	-5.23272
APEX1	Exp082890	-1.63262	0.385639
APEX1	Exp082906	0	0.252129
APEX1	Exp082912	0	-1.34557
APEX1	Exp082915	-5.17905	-2.11541
APEX1	Exp082921	-3.96077	0.593351
APEX1	Exp072630	0	0.0880934
APP	Exp072645	0	-0.172521
APP	Exp072647	0	-1.15867
APP	Exp074392	0	-0.52977
APP	Exp074394	0	-0.767415
APP	Exp076155	0	-0.117142
APP	Exp076157	0	0.0201388
APP	Exp076164	-4.40852	-0.171178
APP	Exp076166	-3.50375	0.241663
APP	Exp072624	0	0.899322
APP	Exp076171	0	-0.172191
APP	Exp076178	0	-0.00803681
APP	Exp076183	0	-0.230445
APP	Exp076185	0	0.248193
APP	Exp076187	0	0.0213265
APP	Exp072626	0	-0.114945
APP	Exp076191	3.31686	-0.201631
APP	Exp076195	0	0.0881173
APP	Exp076200	0	0.00896984
APP	Exp076202	0	0.0302217
APP	Exp082884	-1.9168	-0.0300651
APP	Exp072628	0	0.365257
APP	Exp082890	-1.63262	0.000527322
APP	Exp082906	0	0.0869979
APP	Exp082912	0	0.0798825
APP	Exp082915	-5.17905	-0.111659
APP	Exp082921	-3.96077	-0.239132
APP	Exp072630	0	-0.050035
CDC42	Exp072645	0	0.30343
CDC42	Exp072647	0	-0.635885
CDC42	Exp074392	0	0.263886
CDC42	Exp074394	0	0.221375
CDC42	Exp076155	0	0.575169
CDC42	Exp076157	0	0
CDC42	Exp076164	-4.40852	0
CDC42	Exp076166	-3.50375	-5.45335
CDC42	Exp072624	0	2.02792
CDC42	Exp076171	0	-1.42595
CDC42	Exp076178	0	-5.03239
CDC42	Exp076183	0	0
CDC42	Exp076185	0	3.92313
CDC42	Exp076187	0	-1.614
CDC42	Exp072626	0	-5.44796
CDC42	Exp076191	3.31686	4.24184
CDC42	Exp076195	0	0.633667
CDC42	Exp076200	0	-4.09119
CDC42	Exp076202	0	0.026704
CDC42	Exp082884	-1.9168	5.49544
CDC42	Exp072628	0	-4.77512
CDC42	Exp082890	-1.63262	-5.29047
CDC42	Exp082906	0	-1.06232
CDC42	Exp082912	0	-4.30581
CDC42	Exp082915	-5.17905	-4.46867
CDC42	Exp082921	-3.96077	5.21284
CDC42	Exp072630	0	0.0770777
CRMP1	Exp072645	0	0
CRMP1	Exp072647	0	0
CRMP1	Exp074392	0	5.48674
CRMP1	Exp074394	0	0
CRMP1	Exp076155	0	-4.5793
CRMP1	Exp076157	0	-3.33855
CRMP1	Exp076164	-4.40852	0
CRMP1	Exp076166	-3.50375	0
CRMP1	Exp072624	0	0
CRMP1	Exp076171	0	0
CRMP1	Exp076178	0	0
CRMP1	Exp076183	0	0
CRMP1	Exp076185	0	0
CRMP1	Exp076187	0	0
CRMP1	Exp072626	0	0
CRMP1	Exp076191	3.31686	0
CRMP1	Exp076195	0	-5.25858
CRMP1	Exp076200	0	0
CRMP1	Exp076202	0	0
CRMP1	Exp082884	-1.9168	0
CRMP1	Exp072628	0	5.3381
CRMP1	Exp082890	-1.63262	0
CRMP1	Exp082906	0	0
CRMP1	Exp082912	0	0
CRMP1	Exp082915	-5.17905	0
CRMP1	Exp082921	-3.96077	0
CRMP1	Exp072630	0	3.49243
DNM1	Exp072645	0	5.48776
DNM1	Exp072647	0	0
DNM1	Exp074392	0	-3.92715
DNM1	Exp074394	0	0.31802
DNM1	Exp076155	0	4.45903
DNM1	Exp076157	0	0.468293
DNM1	Exp076164	-4.40852	0.266881
DNM1	Exp076166	-3.50375	0
DNM1	Exp072624	0	-3.46616
DNM1	Exp076171	0	4.87297
DNM1	Exp076178	0	-3.69267
DNM1	Exp076183	0	0
DNM1	Exp076185	0	0.51259
DNM1	Exp076187	0	3.92422
DNM1	Exp072626	0	3.85437
DNM1	Exp076191	3.31686	-0.5117
DNM1	Exp076195	0	0.0571165
DNM1	Exp076200	0	0.530149
DNM1	Exp076202	0	0.312647
DNM1	Exp082884	-1.9168	0.317632
DNM1	Exp072628	0	-3.86196
DNM1	Exp082890	-1.63262	0.250645
DNM1	Exp082906	0	-4.74974
DNM1	Exp082912	0	-3.27059
DNM1	Exp082915	-5.17905	-4.51236
DNM1	Exp082921	-3.96077	3.21499
DNM1	Exp072630	0	0.0468081
DNM1L	Exp072645	0	3.8073
DNM1L	Exp072647	0	-3.06836
DNM1L	Exp074392	0	0
DNM1L	Exp074394	0	0
DNM1L	Exp076155	0	-4.10498
DNM1L	Exp076157	0	0
DNM1L	Exp076164	-4.40852	-3.28961
DNM1L	Exp076166	-3.50375	-4.21566
DNM1L	Exp072624	0	0.466467
DNM1L	Exp076171	0	4.05859
DNM1L	Exp076178	0	0.0613441
DNM1L	Exp076183	0	-3.03329
DNM1L	Exp076185	0	0
DNM1L	Exp076187	0	3.95327
DNM1L	Exp072626	0	0
DNM1L	Exp076191	3.31686	-3.23956
DNM1L	Exp076195	0	-0.218819
DNM1L	Exp076200	0	-3.78058
DNM1L	Exp076202	0	0
DNM1L	Exp082884	-1.9168	0
DNM1L	Exp072628	0	0
DNM1L	Exp082890	-1.63262	0
DNM1L	Exp082906	0	0
DNM1L	Exp082912	0	-5.17818
DNM1L	Exp082915	-5.17905	-3.0973
DNM1L	Exp082921	-3.96077	0
DNM1L	Exp072630	0	3.70002
DPYSL2	Exp072645	0	5.55998
DPYSL2	Exp072647	0	0
DPYSL2	Exp074392	0	5.54755
DPYSL2	Exp074394	0	-5.55741
DPYSL2	Exp076155	0	0.256107
DPYSL2	Exp076157	0	0.595672
DPYSL2	Exp076164	-4.40852	-3.63446
DPYSL2	Exp076166	-3.50375	-3.63999
DPYSL2	Exp072624	0	-3.1925
DPYSL2	Exp076171	0	-4.257
DPYSL2	Exp076178	0	-3.58487
DPYSL2	Exp076183	0	4.57667
DPYSL2	Exp076185	0	0
DPYSL2	Exp076187	0	0
DPYSL2	Exp072626	0	0.442332
DPYSL2	Exp076191	3.31686	0
DPYSL2	Exp076195	0	-4.59537
DPYSL2	Exp076200	0	3.2671
DPYSL2	Exp076202	0	-0.977531
DPYSL2	Exp082884	-1.9168	-0.0439609
DPYSL2	Exp072628	0	0
DPYSL2	Exp082890	-1.63262	-0.107629
DPYSL2	Exp082906	0	5.4329
DPYSL2	Exp082912	0	-5.95642
DPYSL2	Exp082915	-5.17905	-0.0217137
DPYSL2	Exp082921	-3.96077	5.56277
DPYSL2	Exp072630	0	3.43149
DPYSL3	Exp072645	0	0
DPYSL3	Exp072647	0	0
DPYSL3	Exp074392	0	0
DPYSL3	Exp074394	0	-0.934924
DPYSL3	Exp076155	0	-5.1528
DPYSL3	Exp076157	0	0
DPYSL3	Exp076164	-4.40852	-3.47652
DPYSL3	Exp076166	-3.50375	3.57556
DPYSL3	Exp072624	0	3.2169
DPYSL3	Exp076171	0	0
DPYSL3	Exp076178	0	0.0630534
DPYSL3	Exp076183	0	0.468877
DPYSL3	Exp076185	0	4.71569
DPYSL3	Exp076187	0	4.9799
DPYSL3	Exp072626	0	-3.15124
DPYSL3	Exp076191	3.31686	5.13616
DPYSL3	Exp076195	0	4.81181
DPYSL3	Exp076200	0	4.11872
DPYSL3	Exp076202	0	-3.64095
DPYSL3	Exp082884	-1.9168	-4.2144
DPYSL3	Exp072628	0	1.81496
DPYSL3	Exp082890	-1.63262	-0.611321
DPYSL3	Exp082906	0	0
DPYSL3	Exp082912	0	-5.04653
DPYSL3	Exp082915	-5.17905	0
DPYSL3	Exp082921	-3.96077	5.23015
DPYSL3	Exp072630	0	0.136209
EPRS1	Exp072645	0	0.0356006
EPRS1	Exp072647	0	-0.891793
EPRS1	Exp074392	0	-0.352526
EPRS1	Exp074394	0	-0.397742
EPRS1	Exp076155	0	0.111891
EPRS1	Exp076157	0	-0.195488
EPRS1	Exp076164	-4.40852	-0.377407
EPRS1	Exp076166	-3.50375	4.19497
EPRS1	Exp072624	0	0.701407
EPRS1	Exp076171	0	-0.224093
EPRS1	Exp076178	0	-1.75697
EPRS1	Exp076183	0	-0.310799
EPRS1	Exp076185	0	-0.0812754
EPRS1	Exp076187	0	-0.830407
EPRS1	Exp072626	0	-0.306336
EPRS1	Exp076191	3.31686	-0.209464
EPRS1	Exp076195	0	-1.22871
EPRS1	Exp076200	0	-0.0528569
EPRS1	Exp076202	0	0.722462
EPRS1	Exp082884	-1.9168	0.0542651
EPRS1	Exp072628	0	5.12363
EPRS1	Exp082890	-1.63262	-0.398953
EPRS1	Exp082906	0	-0.41061
EPRS1	Exp082912	0	-0.075587
EPRS1	Exp082915	-5.17905	1.39585
EPRS1	Exp082921	-3.96077	1.15313
EPRS1	Exp072630	0	-0.30072
HTT	Exp072645	0	-2.66017
HTT	Exp072647	0	0
HTT	Exp074392	0	-0.894388
HTT	Exp074394	0	-2.3039
HTT	Exp076155	0	0
HTT	Exp076157	0	0
HTT	Exp076164	-4.40852	0
HTT	Exp076166	-3.50375	3.00162
HTT	Exp072624	0	3.79633
HTT	Exp076171	0	0
HTT	Exp076178	0	-3.56071
HTT	Exp076183	0	3.41683
HTT	Exp076185	0	0
HTT	Exp076187	0	0
HTT	Exp072626	0	0
HTT	Exp076191	3.31686	0
HTT	Exp076195	0	0
HTT	Exp076200	0	-2.94094
HTT	Exp076202	0	2.58735
HTT	Exp082884	-1.9168	0
HTT	Exp072628	0	-0.0591546
HTT	Exp082890	-1.63262	0.385769
HTT	Exp082906	0	-3.1713
HTT	Exp082912	0	3.07874
HTT	Exp082915	-5.17905	-3.09234
HTT	Exp082921	-3.96077	-0.0886438
HTT	Exp072630	0	0
LMNA	Exp072645	0	0.515274
LMNA	Exp072647	0	0.335299
LMNA	Exp074392	0	0.0923803
LMNA	Exp074394	0	5.27642
LMNA	Exp076155	0	0.189853
LMNA	Exp076157	0	1.22762
LMNA	Exp076164	-4.40852	0.304527
LMNA	Exp076166	-3.50375	1.51299
LMNA	Exp072624	0	5.71458
LMNA	Exp076171	0	-0.416612
LMNA	Exp076178	0	-0.0764089
LMNA	Exp076183	0	0.188063
LMNA	Exp076185	0	-0.114332
LMNA	Exp076187	0	0.5738
LMNA	Exp072626	0	4.89823
LMNA	Exp076191	3.31686	-0.179198
LMNA	Exp076195	0	0.047391
LMNA	Exp076200	0	0.141402
LMNA	Exp076202	0	-0.504469
LMNA	Exp082884	-1.9168	0.138421
LMNA	Exp072628	0	-0.457804
LMNA	Exp082890	-1.63262	-0.0721457
LMNA	Exp082906	0	-0.145874
LMNA	Exp082912	0	0.681596
LMNA	Exp082915	-5.17905	0.492556
LMNA	Exp082921	-3.96077	-0.480127
LMNA	Exp072630	0	-1.52579
MCAM	Exp072645	0	0.0651607
MCAM	Exp072647	0	0.750503
MCAM	Exp074392	0	0.636331
MCAM	Exp074394	0	-1.37396
MCAM	Exp076155	0	0.139962
MCAM	Exp076157	0	0.0803191
MCAM	Exp076164	-4.40852	-0.123734
MCAM	Exp076166	-3.50375	-0.0634014
MCAM	Exp072624	0	0.110436
MCAM	Exp076171	0	0.0855599
MCAM	Exp076178	0	0.062002
MCAM	Exp076183	0	-0.291594
MCAM	Exp076185	0	-0.232694
MCAM	Exp076187	0	0.102489
MCAM	Exp072626	0	0.00794466
MCAM	Exp076191	3.31686	-0.138066
MCAM	Exp076195	0	-0.128035
MCAM	Exp076200	0	-0.0882663
MCAM	Exp076202	0	-0.274606
MCAM	Exp082884	-1.9168	-0.121924
MCAM	Exp072628	0	0.103863
MCAM	Exp082890	-1.63262	-0.102873
MCAM	Exp082906	0	0.159221
MCAM	Exp082912	0	-0.657825
MCAM	Exp082915	-5.17905	0.711597
MCAM	Exp082921	-3.96077	-0.131253
MCAM	Exp072630	0	-0.0157974
NDE1	Exp072645	0	0
NDE1	Exp072647	0	0
NDE1	Exp074392	0	0
NDE1	Exp074394	0	0
NDE1	Exp076155	0	0
NDE1	Exp076157	0	0
NDE1	Exp076164	-4.40852	0
NDE1	Exp076166	-3.50375	0
NDE1	Exp072624	0	0
NDE1	Exp076171	0	0
NDE1	Exp076178	0	0
NDE1	Exp076183	0	0
NDE1	Exp076185	0	0
NDE1	Exp076187	0	-4.07899
NDE1	Exp072626	0	0
NDE1	Exp076191	3.31686	4.19121
NDE1	Exp076195	0	0
NDE1	Exp076200	0	0
NDE1	Exp076202	0	0
NDE1	Exp082884	-1.9168	-6.11872
NDE1	Exp072628	0	0
NDE1	Exp082890	-1.63262	6.39951
NDE1	Exp082906	0	4.97231
NDE1	Exp082912	0	0
NDE1	Exp082915	-5.17905	0
NDE1	Exp082921	-3.96077	0
NDE1	Exp072630	0	0
NEFM	Exp072645	0	-3.62922
NEFM	Exp072647	0	-4.59656
NEFM	Exp074392	0	0.573047
NEFM	Exp074394	0	0
NEFM	Exp076155	0	-0.456566
NEFM	Exp076157	0	0.277492
NEFM	Exp076164	-4.40852	-0.0752131
NEFM	Exp076166	-3.50375	-0.0417832
NEFM	Exp072624	0	0
NEFM	Exp076171	0	-3.96896
NEFM	Exp076178	0	0.0199169
NEFM	Exp076183	0	4.12532
NEFM	Exp076185	0	0.0323614
NEFM	Exp076187	0	0.215859
NEFM	Exp072626	0	-0.011259
NEFM	Exp076191	3.31686	0.183388
NEFM	Exp076195	0	-0.166131
NEFM	Exp076200	0	-0.401776
NEFM	Exp076202	0	0.0908478
NEFM	Exp082884	-1.9168	-4.09519
NEFM	Exp072628	0	-0.00321309
NEFM	Exp082890	-1.63262	-0.405485
NEFM	Exp082906	0	0.360582
NEFM	Exp082912	0	0.0397389
NEFM	Exp082915	-5.17905	-0.718231
NEFM	Exp082921	-3.96077	-0.929914
NEFM	Exp072630	0	0.0551577
PARP1	Exp072645	0	2.90247
PARP1	Exp072647	0	-0.42265
PARP1	Exp074392	0	-2.0562
PARP1	Exp074394	0	-0.0930788
PARP1	Exp076155	0	-1.45445
PARP1	Exp076157	0	4.53173
PARP1	Exp076164	-4.40852	-4.45584
PARP1	Exp076166	-3.50375	-1.65258
PARP1	Exp072624	0	5.55064
PARP1	Exp076171	0	0.120623
PARP1	Exp076178	0	-4.13826
PARP1	Exp076183	0	-3.71719
PARP1	Exp076185	0	-0.536156
PARP1	Exp076187	0	5.19083
PARP1	Exp072626	0	-0.0101611
PARP1	Exp076191	3.31686	-3.73859
PARP1	Exp076195	0	0
PARP1	Exp076200	0	0
PARP1	Exp076202	0	0.456939
PARP1	Exp082884	-1.9168	-3.63171
PARP1	Exp072628	0	0.157246
PARP1	Exp082890	-1.63262	-2.84291
PARP1	Exp082906	0	-0.661291
PARP1	Exp082912	0	0
PARP1	Exp082915	-5.17905	1.46101
PARP1	Exp082921	-3.96077	0
PARP1	Exp072630	0	-4.3075
PEBP1	Exp072645	0	2.25961
PEBP1	Exp072647	0	-0.681342
PEBP1	Exp074392	0	4.84561
PEBP1	Exp074394	0	-1.45966
PEBP1	Exp076155	0	-0.801948
PEBP1	Exp076157	0	-5.32508
PEBP1	Exp076164	-4.40852	0.12438
PEBP1	Exp076166	-3.50375	5.93058
PEBP1	Exp072624	0	-0.2136
PEBP1	Exp076171	0	0.0377864
PEBP1	Exp076178	0	5.41081
PEBP1	Exp076183	0	-0.683504
PEBP1	Exp076185	0	-1.24175
PEBP1	Exp076187	0	1.90832
PEBP1	Exp072626	0	0.439274
PEBP1	Exp076191	3.31686	-5.1793
PEBP1	Exp076195	0	-5.75854
PEBP1	Exp076200	0	-5.36248
PEBP1	Exp076202	0	0
PEBP1	Exp082884	-1.9168	-6.39746
PEBP1	Exp072628	0	-0.106156
PEBP1	Exp082890	-1.63262	-0.165355
PEBP1	Exp082906	0	-1.25787
PEBP1	Exp082912	0	1.05596
PEBP1	Exp082915	-5.17905	0.862973
PEBP1	Exp082921	-3.96077	0.203122
PEBP1	Exp072630	0	6.24224
PPP1CA	Exp072645	0	-0.0160925
PPP1CA	Exp072647	0	-5.08829
PPP1CA	Exp074392	0	-5.86669
PPP1CA	Exp074394	0	2.17106
PPP1CA	Exp076155	0	-0.156668
PPP1CA	Exp076157	0	0.108308
PPP1CA	Exp076164	-4.40852	-0.200103
PPP1CA	Exp076166	-3.50375	-0.0979349
PPP1CA	Exp072624	0	-3.81917
PPP1CA	Exp076171	0	0.215328
PPP1CA	Exp076178	0	0.0297488
PPP1CA	Exp076183	0	-0.0586567
PPP1CA	Exp076185	0	-0.337916
PPP1CA	Exp076187	0	-0.0788512
PPP1CA	Exp072626	0	-1.20134
PPP1CA	Exp076191	3.31686	5.42218
PPP1CA	Exp076195	0	5.49118
PPP1CA	Exp076200	0	-0.149695
PPP1CA	Exp076202	0	-0.0500789
PPP1CA	Exp082884	-1.9168	0.328346
PPP1CA	Exp072628	0	0.166166
PPP1CA	Exp082890	-1.63262	-1.89068
PPP1CA	Exp082906	0	-5.29607
PPP1CA	Exp082912	0	0.169164
PPP1CA	Exp082915	-5.17905	-0.0925766
PPP1CA	Exp082921	-3.96077	5.43434
PPP1CA	Exp072630	0	-1.52905
PSEN1	Exp072645	0	0.0128201
PSEN1	Exp072647	0	0
PSEN1	Exp074392	0	-0.0948643
PSEN1	Exp074394	0	0.323744
PSEN1	Exp076155	0	-0.0190608
PSEN1	Exp076157	0	-0.104525
PSEN1	Exp076164	-4.40852	0.145592
PSEN1	Exp076166	-3.50375	0.570424
PSEN1	Exp072624	0	-3.9758
PSEN1	Exp076171	0	0.908433
PSEN1	Exp076178	0	-1.2216
PSEN1	Exp076183	0	-0.0404774
PSEN1	Exp076185	0	0.00221328
PSEN1	Exp076187	0	-0.109826
PSEN1	Exp072626	0	-4.90149
PSEN1	Exp076191	3.31686	0.573468
PSEN1	Exp076195	0	-0.346432
PSEN1	Exp076200	0	-0.0898741
PSEN1	Exp076202	0	-0.178974
PSEN1	Exp082884	-1.9168	0
PSEN1	Exp072628	0	0
PSEN1	Exp082890	-1.63262	0.176297
PSEN1	Exp082906	0	4.32193
PSEN1	Exp082912	0	4.63342
PSEN1	Exp082915	-5.17905	-4.44296
PSEN1	Exp082921	-3.96077	-0.177999
PSEN1	Exp072630	0	0
PTK2	Exp072645	0	-3.8005
PTK2	Exp072647	0	0
PTK2	Exp074392	0	0
PTK2	Exp074394	0	0
PTK2	Exp076155	0	0.298362
PTK2	Exp076157	0	0
PTK2	Exp076164	-4.40852	0
PTK2	Exp076166	-3.50375	-0.421939
PTK2	Exp072624	0	0
PTK2	Exp076171	0	-4.32072
PTK2	Exp076178	0	4.61455
PTK2	Exp076183	0	0
PTK2	Exp076185	0	0.312784
PTK2	Exp076187	0	0.217777
PTK2	Exp072626	0	0
PTK2	Exp076191	3.31686	0
PTK2	Exp076195	0	4.25399
PTK2	Exp076200	0	0
PTK2	Exp076202	0	-4.4454
PTK2	Exp082884	-1.9168	0
PTK2	Exp072628	0	0
PTK2	Exp082890	-1.63262	0.537216
PTK2	Exp082906	0	-0.310274
PTK2	Exp082912	0	0
PTK2	Exp082915	-5.17905	0
PTK2	Exp082921	-3.96077	0
PTK2	Exp072630	0	4.61818
TLN1	Exp072645	0	0.0467219
TLN1	Exp072647	0	1.33598
TLN1	Exp074392	0	-1.95442
TLN1	Exp074394	0	-1.72362
TLN1	Exp076155	0	-1.46016
TLN1	Exp076157	0	1.56573
TLN1	Exp076164	-4.40852	-0.0417876
TLN1	Exp076166	-3.50375	1.38365
TLN1	Exp072624	0	-0.261926
TLN1	Exp076171	0	0.121937
TLN1	Exp076178	0	0.300544
TLN1	Exp076183	0	-1.60801
TLN1	Exp076185	0	0.138818
TLN1	Exp076187	0	0.181087
TLN1	Exp072626	0	-1.08409
TLN1	Exp076191	3.31686	-0.0584427
TLN1	Exp076195	0	1.48387
TLN1	Exp076200	0	0.0684246
TLN1	Exp076202	0	-0.397259
TLN1	Exp082884	-1.9168	0.843827
TLN1	Exp072628	0	-1.15346
TLN1	Exp082890	-1.63262	0.104227
TLN1	Exp082906	0	-0.0520799
TLN1	Exp082912	0	-0.0149095
TLN1	Exp082915	-5.17905	-2.03469
TLN1	Exp082921	-3.96077	-0.531213
TLN1	Exp072630	0	1.68033
VIM	Exp072645	0	0.407246
VIM	Exp072647	0	-0.371881
VIM	Exp074392	0	0.0253454
VIM	Exp074394	0	-0.0887416
VIM	Exp076155	0	-0.0647597
VIM	Exp076157	0	-0.856254
VIM	Exp076164	-4.40852	-0.436283
VIM	Exp076166	-3.50375	0.173708
VIM	Exp072624	0	-0.203528
VIM	Exp076171	0	-0.0685725
VIM	Exp076178	0	-0.0113113
VIM	Exp076183	0	-0.0808338
VIM	Exp076185	0	-0.356707
VIM	Exp076187	0	0.00858017
VIM	Exp072626	0	-0.162528
VIM	Exp076191	3.31686	-0.397743
VIM	Exp076195	0	0.308804
VIM	Exp076200	0	-0.85731
VIM	Exp076202	0	0.110934
VIM	Exp082884	-1.9168	0.0179865
VIM	Exp072628	0	0.0875
VIM	Exp082890	-1.63262	-0.189701
VIM	Exp082906	0	-0.23736
VIM	Exp082912	0	-0.0335832
VIM	Exp082915	-5.17905	-0.339216
VIM	Exp082921	-3.96077	0.0850888
VIM	Exp072630	0	0.304021
ATM	Exp072645	0	0
ATM	Exp072647	0	0.329357
ATM	Exp074392	0	-4.48286
ATM	Exp074394	0	-1.17695
ATM	Exp076155	0	0.338277
ATM	Exp076157	0	0.695496
ATM	Exp076164	-4.40852	4.55428
ATM	Exp076166	-3.50375	1.78899
ATM	Exp072624	0	4.95152
ATM	Exp076171	0	-0.435365
ATM	Exp076178	0	0
ATM	Exp076183	0	0
ATM	Exp076185	0	-4.20209
ATM	Exp076187	0	4.36731
ATM	Exp072626	0	0
ATM	Exp076191	3.31686	4.31896
ATM	Exp076195	0	0.0878325
ATM	Exp076200	0	-4.68345
ATM	Exp076202	0	-4.65595
ATM	Exp082884	-1.9168	-0.120321
ATM	Exp072628	0	-4.61606
ATM	Exp082890	-1.63262	-4.65499
ATM	Exp082906	0	3.75705
ATM	Exp082912	0	-4.32732
ATM	Exp082915	-5.17905	0.361077
ATM	Exp082921	-3.96077	0.513062
ATM	Exp072630	0	0
CTNNB1	Exp072645	0	5.0276
CTNNB1	Exp072647	0	0
CTNNB1	Exp074392	0	-4.25402
CTNNB1	Exp074394	0	0.0656105
CTNNB1	Exp076155	0	-0.1423
CTNNB1	Exp076157	0	0.0774431
CTNNB1	Exp076164	-4.40852	-0.688365
CTNNB1	Exp076166	-3.50375	-0.750497
CTNNB1	Exp072624	0	3.38252
CTNNB1	Exp076171	0	-0.799783
CTNNB1	Exp076178	0	-0.102064
CTNNB1	Exp076183	0	-0.155256
CTNNB1	Exp076185	0	-0.193727
CTNNB1	Exp076187	0	-0.0922019
CTNNB1	Exp072626	0	0.856362
CTNNB1	Exp076191	3.31686	0.295302
CTNNB1	Exp076195	0	0.031032
CTNNB1	Exp076200	0	0.127607
CTNNB1	Exp076202	0	0.106753
CTNNB1	Exp082884	-1.9168	-0.559081
CTNNB1	Exp072628	0	-0.0728795
CTNNB1	Exp082890	-1.63262	-0.992251
CTNNB1	Exp082906	0	0.282694
CTNNB1	Exp082912	0	0.124007
CTNNB1	Exp082915	-5.17905	-0.354979
CTNNB1	Exp082921	-3.96077	3.83267
CTNNB1	Exp072630	0	0.27145
MAP1B	Exp072645	0	3.86177
MAP1B	Exp072647	0	-3.01789
MAP1B	Exp074392	0	3.65146
MAP1B	Exp074394	0	0
MAP1B	Exp076155	0	2.57762
MAP1B	Exp076157	0	0.042025
MAP1B	Exp076164	-4.40852	-0.530225
MAP1B	Exp076166	-3.50375	0.61192
MAP1B	Exp072624	0	2.73212
MAP1B	Exp076171	0	-0.29253
MAP1B	Exp076178	0	-3.32774
MAP1B	Exp076183	0	0.220846
MAP1B	Exp076185	0	0
MAP1B	Exp076187	0	0
MAP1B	Exp072626	0	0
MAP1B	Exp076191	3.31686	2.26845
MAP1B	Exp076195	0	-2.38969
MAP1B	Exp076200	0	-2.19423
MAP1B	Exp076202	0	-2.78855
MAP1B	Exp082884	-1.9168	-5.67092
MAP1B	Exp072628	0	0.106513
MAP1B	Exp082890	-1.63262	0
MAP1B	Exp082906	0	3.36025
MAP1B	Exp082912	0	-3.89244
MAP1B	Exp082915	-5.17905	-3.16898
MAP1B	Exp082921	-3.96077	-3.66055
MAP1B	Exp072630	0	-4.65531
MAP2	Exp072645	0	0
MAP2	Exp072647	0	0
MAP2	Exp074392	0	-4.1797
MAP2	Exp074394	0	0
MAP2	Exp076155	0	-5.00911
MAP2	Exp076157	0	3.80179
MAP2	Exp076164	-4.40852	-4.35633
MAP2	Exp076166	-3.50375	3.7226
MAP2	Exp072624	0	4.0719
MAP2	Exp076171	0	4.03027
MAP2	Exp076178	0	0
MAP2	Exp076183	0	0
MAP2	Exp076185	0	0.551385
MAP2	Exp076187	0	0
MAP2	Exp072626	0	0.0803681
MAP2	Exp076191	3.31686	-3.89308
MAP2	Exp076195	0	0.204066
MAP2	Exp076200	0	0
MAP2	Exp076202	0	0
MAP2	Exp082884	-1.9168	-3.50603
MAP2	Exp072628	0	1.17377
MAP2	Exp082890	-1.63262	0
MAP2	Exp082906	0	-3.3497
MAP2	Exp082912	0	0.223892
MAP2	Exp082915	-5.17905	2.9313
MAP2	Exp082921	-3.96077	0
MAP2	Exp072630	0	4.07153
NEFL	Exp072645	0	-3.83586
NEFL	Exp072647	0	4.78518
NEFL	Exp074392	0	-3.99746
NEFL	Exp074394	0	0
NEFL	Exp076155	0	0
NEFL	Exp076157	0	0
NEFL	Exp076164	-4.40852	0
NEFL	Exp076166	-3.50375	0
NEFL	Exp072624	0	0
NEFL	Exp076171	0	0
NEFL	Exp076178	0	0
NEFL	Exp076183	0	0
NEFL	Exp076185	0	-3.50487
NEFL	Exp076187	0	0
NEFL	Exp072626	0	0
NEFL	Exp076191	3.31686	0
NEFL	Exp076195	0	0
NEFL	Exp076200	0	0
NEFL	Exp076202	0	0
NEFL	Exp082884	-1.9168	0
NEFL	Exp072628	0	4.20134
NEFL	Exp082890	-1.63262	0
NEFL	Exp082906	0	0
NEFL	Exp082912	0	-3.57081
NEFL	Exp082915	-5.17905	0
NEFL	Exp082921	-3.96077	-2.92016
NEFL	Exp072630	0	0
RAC1	Exp072645	0	-1.50823
RAC1	Exp072647	0	-1.0325
RAC1	Exp074392	0	0.167196
RAC1	Exp074394	0	0
RAC1	Exp076155	0	-0.346862
RAC1	Exp076157	0	-1.25214
RAC1	Exp076164	-4.40852	0
RAC1	Exp076166	-3.50375	0
RAC1	Exp072624	0	-0.293042
RAC1	Exp076171	0	-0.572061
RAC1	Exp076178	0	-0.975835
RAC1	Exp076183	0	0.463627
RAC1	Exp076185	0	-0.144875
RAC1	Exp076187	0	-0.150913
RAC1	Exp072626	0	0.30292
RAC1	Exp076191	3.31686	-0.474407
RAC1	Exp076195	0	-5.52164
RAC1	Exp076200	0	-0.745193
RAC1	Exp076202	0	-0.635624
RAC1	Exp082884	-1.9168	0
RAC1	Exp072628	0	0.117187
RAC1	Exp082890	-1.63262	0.802854
RAC1	Exp082906	0	6.13288
RAC1	Exp082912	0	-5.94653
RAC1	Exp082915	-5.17905	-4.76687
RAC1	Exp082921	-3.96077	-0.353995
RAC1	Exp072630	0	1.21834
STAT3	Exp072645	0	0.2383
STAT3	Exp072647	0	4.88531
STAT3	Exp074392	0	-4.50669
STAT3	Exp074394	0	1.46017
STAT3	Exp076155	0	0.142945
STAT3	Exp076157	0	0.318168
STAT3	Exp076164	-4.40852	-5.23563
STAT3	Exp076166	-3.50375	0.445255
STAT3	Exp072624	0	-5.01672
STAT3	Exp076171	0	0.470254
STAT3	Exp076178	0	0.807844
STAT3	Exp076183	0	0.274019
STAT3	Exp076185	0	-6.3337
STAT3	Exp076187	0	0.0753694
STAT3	Exp072626	0	-1.25389
STAT3	Exp076191	3.31686	-0.130782
STAT3	Exp076195	0	1.10746
STAT3	Exp076200	0	-4.76517
STAT3	Exp076202	0	-6.27644
STAT3	Exp082884	-1.9168	0.522563
STAT3	Exp072628	0	0
STAT3	Exp082890	-1.63262	1.74363
STAT3	Exp082906	0	0
STAT3	Exp082912	0	-5.36545
STAT3	Exp082915	-5.17905	5.29381
STAT3	Exp082921	-3.96077	-4.73638
STAT3	Exp072630	0	0.0178589
DBN1	Exp072645	0	-0.207287
DBN1	Exp072647	0	3.32766
DBN1	Exp074392	0	5.67076
DBN1	Exp074394	0	3.32197
DBN1	Exp076155	0	-3.13372
DBN1	Exp076157	0	0
DBN1	Exp076164	-4.40852	-2.04804
DBN1	Exp076166	-3.50375	0
DBN1	Exp072624	0	6.73853
DBN1	Exp076171	0	5.78226
DBN1	Exp076178	0	0
DBN1	Exp076183	0	-5.49562
DBN1	Exp076185	0	0
DBN1	Exp076187	0	0
DBN1	Exp072626	0	0
DBN1	Exp076191	3.31686	0
DBN1	Exp076195	0	5.63891
DBN1	Exp076200	0	-5.78894
DBN1	Exp076202	0	-5.78791
DBN1	Exp082884	-1.9168	0.0677626
DBN1	Exp072628	0	0
DBN1	Exp082890	-1.63262	-0.179936
DBN1	Exp082906	0	0
DBN1	Exp082912	0	-4.98027
DBN1	Exp082915	-5.17905	5.33482
DBN1	Exp082921	-3.96077	0
DBN1	Exp072630	0	3.86747
DNMT1	Exp072645	0	0
DNMT1	Exp072647	0	-3.37135
DNMT1	Exp074392	0	-0.296969
DNMT1	Exp074394	0	0
DNMT1	Exp076155	0	0
DNMT1	Exp076157	0	0.241629
DNMT1	Exp076164	-4.40852	0
DNMT1	Exp076166	-3.50375	4.44909
DNMT1	Exp072624	0	0
DNMT1	Exp076171	0	4.35794
DNMT1	Exp076178	0	3.31004
DNMT1	Exp076183	0	0
DNMT1	Exp076185	0	-2.55672
DNMT1	Exp076187	0	0
DNMT1	Exp072626	0	0
DNMT1	Exp076191	3.31686	0
DNMT1	Exp076195	0	3.84771
DNMT1	Exp076200	0	0
DNMT1	Exp076202	0	0
DNMT1	Exp082884	-1.9168	0
DNMT1	Exp072628	0	0
DNMT1	Exp082890	-1.63262	0
DNMT1	Exp082906	0	0
DNMT1	Exp082912	0	3.91633
DNMT1	Exp082915	-5.17905	0
DNMT1	Exp082921	-3.96077	0
DNMT1	Exp072630	0	0
MEF2D	Exp072645	0	-6.3914
MEF2D	Exp072647	0	0
MEF2D	Exp074392	0	0
MEF2D	Exp074394	0	0
MEF2D	Exp076155	0	0
MEF2D	Exp076157	0	6.27509
MEF2D	Exp076164	-4.40852	0
MEF2D	Exp076166	-3.50375	0
MEF2D	Exp072624	0	-0.0920282
MEF2D	Exp076171	0	0
MEF2D	Exp076178	0	0
MEF2D	Exp076183	0	0
MEF2D	Exp076185	0	6.14215
MEF2D	Exp076187	0	0
MEF2D	Exp072626	0	-6.75803
MEF2D	Exp076191	3.31686	6.36517
MEF2D	Exp076195	0	0
MEF2D	Exp076200	0	0
MEF2D	Exp076202	0	0
MEF2D	Exp082884	-1.9168	6.48792
MEF2D	Exp072628	0	0
MEF2D	Exp082890	-1.63262	0
MEF2D	Exp082906	0	0
MEF2D	Exp082912	0	0
MEF2D	Exp082915	-5.17905	0
MEF2D	Exp082921	-3.96077	0
MEF2D	Exp072630	0	6.51379
STXBP2	Exp072645	0	0
STXBP2	Exp072647	0	0.136663
STXBP2	Exp074392	0	-3.71077
STXBP2	Exp074394	0	-4.41636
STXBP2	Exp076155	0	0.327766
STXBP2	Exp076157	0	0
STXBP2	Exp076164	-4.40852	0
STXBP2	Exp076166	-3.50375	-0.103445
STXBP2	Exp072624	0	-1.04557
STXBP2	Exp076171	0	0.787391
STXBP2	Exp076178	0	3.07139
STXBP2	Exp076183	0	4.35611
STXBP2	Exp076185	0	0
STXBP2	Exp076187	0	0
STXBP2	Exp072626	0	-4.52586
STXBP2	Exp076191	3.31686	0
STXBP2	Exp076195	0	0
STXBP2	Exp076200	0	-3.21778
STXBP2	Exp076202	0	4.63211
STXBP2	Exp082884	-1.9168	-3.45882
STXBP2	Exp072628	0	-5.87744
STXBP2	Exp082890	-1.63262	5.56996
STXBP2	Exp082906	0	-0.723567
STXBP2	Exp082912	0	0.00767288
STXBP2	Exp082915	-5.17905	-0.716858
STXBP2	Exp082921	-3.96077	-3.87211
STXBP2	Exp072630	0	0
CDK5	Exp072645	0	0
CDK5	Exp072647	0	0
CDK5	Exp074392	0	0
CDK5	Exp074394	0	0
CDK5	Exp076155	0	0
CDK5	Exp076157	0	0
CDK5	Exp076164	-4.40852	-4.40852
CDK5	Exp076166	-3.50375	-3.50375
CDK5	Exp072624	0	0
CDK5	Exp076171	0	0
CDK5	Exp076178	0	0
CDK5	Exp076183	0	0
CDK5	Exp076185	0	0
CDK5	Exp076187	0	0
CDK5	Exp072626	0	0
CDK5	Exp076191	3.31686	3.31686
CDK5	Exp076195	0	0
CDK5	Exp076200	0	0
CDK5	Exp076202	0	0
CDK5	Exp082884	-1.9168	-1.9168
CDK5	Exp072628	0	0
CDK5	Exp082890	-1.63262	-1.63262
CDK5	Exp082906	0	0
CDK5	Exp082912	0	0
CDK5	Exp082915	-5.17905	-5.17905
CDK5	Exp082921	-3.96077	-3.96077
CDK5	Exp072630	0	0
EFHD2	Exp072645	0	-0.321014
EFHD2	Exp072647	0	0
EFHD2	Exp074392	0	0.10721
EFHD2	Exp074394	0	-0.216824
EFHD2	Exp076155	0	-0.438678
EFHD2	Exp076157	0	0
EFHD2	Exp076164	-4.40852	0.138394
EFHD2	Exp076166	-3.50375	-5.54059
EFHD2	Exp072624	0	-5.88876
EFHD2	Exp076171	0	0
EFHD2	Exp076178	0	0.0538411
EFHD2	Exp076183	0	0
EFHD2	Exp076185	0	0.0593144
EFHD2	Exp076187	0	0.300319
EFHD2	Exp072626	0	0.631056
EFHD2	Exp076191	3.31686	0.721272
EFHD2	Exp076195	0	5.47719
EFHD2	Exp076200	0	1.6799
EFHD2	Exp076202	0	5.377
EFHD2	Exp082884	-1.9168	3.69067
EFHD2	Exp072628	0	-0.258201
EFHD2	Exp082890	-1.63262	1.16824
EFHD2	Exp082906	0	-2.60025
EFHD2	Exp082912	0	-1.67497
EFHD2	Exp082915	-5.17905	0
EFHD2	Exp082921	-3.96077	0
EFHD2	Exp072630	0	-0.381118
MAP2K1	Exp072645	0	-4.11769
MAP2K1	Exp072647	0	-0.303502
MAP2K1	Exp074392	0	0
MAP2K1	Exp074394	0	-2.28785
MAP2K1	Exp076155	0	6.59208
MAP2K1	Exp076157	0	0.259997
MAP2K1	Exp076164	-4.40852	0
MAP2K1	Exp076166	-3.50375	6.29081
MAP2K1	Exp072624	0	5.20591
MAP2K1	Exp076171	0	6.20941
MAP2K1	Exp076178	0	0
MAP2K1	Exp076183	0	0.523245
MAP2K1	Exp076185	0	-6.09292
MAP2K1	Exp076187	0	0.13144
MAP2K1	Exp072626	0	0
MAP2K1	Exp076191	3.31686	1.9786
MAP2K1	Exp076195	0	-3.6209
MAP2K1	Exp076200	0	0.451045
MAP2K1	Exp076202	0	0
MAP2K1	Exp082884	-1.9168	-4.57912
MAP2K1	Exp072628	0	0
MAP2K1	Exp082890	-1.63262	0
MAP2K1	Exp082906	0	0
MAP2K1	Exp082912	0	-5.07881
MAP2K1	Exp082915	-5.17905	0
MAP2K1	Exp082921	-3.96077	0
MAP2K1	Exp072630	0	0.635472
PAK1	Exp072645	0	0
PAK1	Exp072647	0	0
PAK1	Exp074392	0	0
PAK1	Exp074394	0	0
PAK1	Exp076155	0	0
PAK1	Exp076157	0	0
PAK1	Exp076164	-4.40852	0
PAK1	Exp076166	-3.50375	0
PAK1	Exp072624	0	0
PAK1	Exp076171	0	0
PAK1	Exp076178	0	0
PAK1	Exp076183	0	0
PAK1	Exp076185	0	0
PAK1	Exp076187	0	0
PAK1	Exp072626	0	0
PAK1	Exp076191	3.31686	0
PAK1	Exp076195	0	0
PAK1	Exp076200	0	0
PAK1	Exp076202	0	0
PAK1	Exp082884	-1.9168	0
PAK1	Exp072628	0	0
PAK1	Exp082890	-1.63262	0
PAK1	Exp082906	0	0
PAK1	Exp082912	0	4.0894
PAK1	Exp082915	-5.17905	-3.93963
PAK1	Exp082921	-3.96077	-3.7211
PAK1	Exp072630	0	-3.26589
PXN	Exp072645	0	0
PXN	Exp072647	0	-3.45527
PXN	Exp074392	0	0
PXN	Exp074394	0	-2.52171
PXN	Exp076155	0	0
PXN	Exp076157	0	0
PXN	Exp076164	-4.40852	0
PXN	Exp076166	-3.50375	-2.89148
PXN	Exp072624	0	0
PXN	Exp076171	0	0
PXN	Exp076178	0	3.57797
PXN	Exp076183	0	3.22326
PXN	Exp076185	0	0
PXN	Exp076187	0	2.95747
PXN	Exp072626	0	0
PXN	Exp076191	3.31686	0
PXN	Exp076195	0	-0.28537
PXN	Exp076200	0	0
PXN	Exp076202	0	3.25356
PXN	Exp082884	-1.9168	0
PXN	Exp072628	0	0
PXN	Exp082890	-1.63262	0
PXN	Exp082906	0	0
PXN	Exp082912	0	0
PXN	Exp082915	-5.17905	0
PXN	Exp082921	-3.96077	0
PXN	Exp072630	0	0
SH3GLB1	Exp072645	0	0
SH3GLB1	Exp072647	0	0
SH3GLB1	Exp074392	0	-1.34654
SH3GLB1	Exp074394	0	0
SH3GLB1	Exp076155	0	0
SH3GLB1	Exp076157	0	0
SH3GLB1	Exp076164	-4.40852	0
SH3GLB1	Exp076166	-3.50375	0
SH3GLB1	Exp072624	0	-3.2376
SH3GLB1	Exp076171	0	0.561159
SH3GLB1	Exp076178	0	4.00677
SH3GLB1	Exp076183	0	-0.609346
SH3GLB1	Exp076185	0	3.68145
SH3GLB1	Exp076187	0	0
SH3GLB1	Exp072626	0	0
SH3GLB1	Exp076191	3.31686	-0.394473
SH3GLB1	Exp076195	0	0
SH3GLB1	Exp076200	0	-3.14435
SH3GLB1	Exp076202	0	3.24821
SH3GLB1	Exp082884	-1.9168	0
SH3GLB1	Exp072628	0	0
SH3GLB1	Exp082890	-1.63262	0
SH3GLB1	Exp082906	0	0
SH3GLB1	Exp082912	0	0
SH3GLB1	Exp082915	-5.17905	0
SH3GLB1	Exp082921	-3.96077	0
SH3GLB1	Exp072630	0	0
SRC	Exp072645	0	0
SRC	Exp072647	0	4.47719
SRC	Exp074392	0	4.68375
SRC	Exp074394	0	3.52527
SRC	Exp076155	0	0.167808
SRC	Exp076157	0	0.0752141
SRC	Exp076164	-4.40852	0
SRC	Exp076166	-3.50375	-3.89928
SRC	Exp072624	0	0
SRC	Exp076171	0	0
SRC	Exp076178	0	0
SRC	Exp076183	0	0.161946
SRC	Exp076185	0	0
SRC	Exp076187	0	-5.09825
SRC	Exp072626	0	0
SRC	Exp076191	3.31686	-0.654922
SRC	Exp076195	0	0
SRC	Exp076200	0	0
SRC	Exp076202	0	-5.07319
SRC	Exp082884	-1.9168	-1.7302
SRC	Exp072628	0	2.14028
SRC	Exp082890	-1.63262	-0.0753095
SRC	Exp082906	0	-3.66637
SRC	Exp082912	0	0
SRC	Exp082915	-5.17905	-3.98986
SRC	Exp082921	-3.96077	4.6564
SRC	Exp072630	0	4.05801
NEFH	Exp072645	0	0
NEFH	Exp072647	0	0
NEFH	Exp074392	0	0.352306
NEFH	Exp074394	0	0
NEFH	Exp076155	0	-3.55896
NEFH	Exp076157	0	0
NEFH	Exp076164	-4.40852	0
NEFH	Exp076166	-3.50375	0
NEFH	Exp072624	0	0
NEFH	Exp076171	0	0
NEFH	Exp076178	0	0
NEFH	Exp076183	0	0
NEFH	Exp076185	0	0
NEFH	Exp076187	0	0
NEFH	Exp072626	0	5.92339
NEFH	Exp076191	3.31686	-6.33121
NEFH	Exp076195	0	0
NEFH	Exp076200	0	0
NEFH	Exp076202	0	0
NEFH	Exp082884	-1.9168	6.22093
NEFH	Exp072628	0	0
NEFH	Exp082890	-1.63262	6.27054
NEFH	Exp082906	0	6.32246
NEFH	Exp082912	0	-3.30333
NEFH	Exp082915	-5.17905	0
NEFH	Exp082921	-3.96077	-0.345774
NEFH	Exp072630	0	-4.03309
RPA2	Exp072645	0	5.24992
RPA2	Exp072647	0	-4.65828
RPA2	Exp074392	0	-0.0121687
RPA2	Exp074394	0	0
RPA2	Exp076155	0	-4.94164
RPA2	Exp076157	0	-4.7788
RPA2	Exp076164	-4.40852	0
RPA2	Exp076166	-3.50375	3.90626
RPA2	Exp072624	0	0
RPA2	Exp076171	0	4.45894
RPA2	Exp076178	0	-5.00493
RPA2	Exp076183	0	-0.454784
RPA2	Exp076185	0	-5.60588
RPA2	Exp076187	0	0.0937352
RPA2	Exp072626	0	-5.26928
RPA2	Exp076191	3.31686	-5.5012
RPA2	Exp076195	0	0
RPA2	Exp076200	0	-4.15423
RPA2	Exp076202	0	5.15646
RPA2	Exp082884	-1.9168	-5.36337
RPA2	Exp072628	0	-5.24946
RPA2	Exp082890	-1.63262	0
RPA2	Exp082906	0	0
RPA2	Exp082912	0	4.94123
RPA2	Exp082915	-5.17905	-5.10798
RPA2	Exp082921	-3.96077	5.32931
RPA2	Exp072630	0	0.330892
ELAVL1	Exp072645	0	0.519507
ELAVL1	Exp072647	0	0
ELAVL1	Exp074392	0	0
ELAVL1	Exp074394	0	0
ELAVL1	Exp076155	0	0
ELAVL1	Exp076157	0	-4.30825
ELAVL1	Exp076164	-4.40852	0
ELAVL1	Exp076166	-3.50375	-4.11662
ELAVL1	Exp072624	0	0
ELAVL1	Exp076171	0	-3.60462
ELAVL1	Exp076178	0	0
ELAVL1	Exp076183	0	-3.97688
ELAVL1	Exp076185	0	0
ELAVL1	Exp076187	0	0
ELAVL1	Exp072626	0	0
ELAVL1	Exp076191	3.31686	0
ELAVL1	Exp076195	0	0
ELAVL1	Exp076200	0	-3.85565
ELAVL1	Exp076202	0	0
ELAVL1	Exp082884	-1.9168	-6.90523
ELAVL1	Exp072628	0	0
ELAVL1	Exp082890	-1.63262	-3.51551
ELAVL1	Exp082906	0	5.26376
ELAVL1	Exp082912	0	0
ELAVL1	Exp082915	-5.17905	-3.48229
ELAVL1	Exp082921	-3.96077	3.55825
ELAVL1	Exp072630	0	-0.110102
HDAC1	Exp072645	0	-3.64808
HDAC1	Exp072647	0	4.30916
HDAC1	Exp074392	0	4.36839
HDAC1	Exp074394	0	0
HDAC1	Exp076155	0	3.76001
HDAC1	Exp076157	0	0
HDAC1	Exp076164	-4.40852	0
HDAC1	Exp076166	-3.50375	0
HDAC1	Exp072624	0	0
HDAC1	Exp076171	0	4.85006
HDAC1	Exp076178	0	0
HDAC1	Exp076183	0	0
HDAC1	Exp076185	0	0
HDAC1	Exp076187	0	0
HDAC1	Exp072626	0	0
HDAC1	Exp076191	3.31686	0
HDAC1	Exp076195	0	-4.24945
HDAC1	Exp076200	0	0
HDAC1	Exp076202	0	0
HDAC1	Exp082884	-1.9168	3.57058
HDAC1	Exp072628	0	0
HDAC1	Exp082890	-1.63262	0
HDAC1	Exp082906	0	0
HDAC1	Exp082912	0	-2.6836
HDAC1	Exp082915	-5.17905	0
HDAC1	Exp082921	-3.96077	4.34287
HDAC1	Exp072630	0	0
RHOA	Exp072645	0	3.19025
RHOA	Exp072647	0	3.74779
RHOA	Exp074392	0	-3.74265
RHOA	Exp074394	0	-5.67727
RHOA	Exp076155	0	-0.390302
RHOA	Exp076157	0	4.1501
RHOA	Exp076164	-4.40852	0.556699
RHOA	Exp076166	-3.50375	0
RHOA	Exp072624	0	0
RHOA	Exp076171	0	4.54011
RHOA	Exp076178	0	0
RHOA	Exp076183	0	1.03065
RHOA	Exp076185	0	0
RHOA	Exp076187	0	0.309874
RHOA	Exp072626	0	0
RHOA	Exp076191	3.31686	-4.92159
RHOA	Exp076195	0	3.18478
RHOA	Exp076200	0	0.729219
RHOA	Exp076202	0	0
RHOA	Exp082884	-1.9168	0
RHOA	Exp072628	0	0
RHOA	Exp082890	-1.63262	0
RHOA	Exp082906	0	2.8807
RHOA	Exp082912	0	0
RHOA	Exp082915	-5.17905	3.6535
RHOA	Exp082921	-3.96077	0
RHOA	Exp072630	0	-4.69996
LRRK2	Exp072645	0	0
LRRK2	Exp072647	0	0
LRRK2	Exp074392	0	0
LRRK2	Exp074394	0	3.22385
LRRK2	Exp076155	0	0
LRRK2	Exp076157	0	0
LRRK2	Exp076164	-4.40852	0
LRRK2	Exp076166	-3.50375	0
LRRK2	Exp072624	0	4.48067
LRRK2	Exp076171	0	0
LRRK2	Exp076178	0	-4.57264
LRRK2	Exp076183	0	0
LRRK2	Exp076185	0	0
LRRK2	Exp076187	0	0
LRRK2	Exp072626	0	4.14227
LRRK2	Exp076191	3.31686	0
LRRK2	Exp076195	0	0
LRRK2	Exp076200	0	-3.68243
LRRK2	Exp076202	0	0
LRRK2	Exp082884	-1.9168	0
LRRK2	Exp072628	0	0
LRRK2	Exp082890	-1.63262	0
LRRK2	Exp082906	0	0
LRRK2	Exp082912	0	0
LRRK2	Exp082915	-5.17905	0
LRRK2	Exp082921	-3.96077	0
LRRK2	Exp072630	0	0
AMPH	Exp072645	0	0
AMPH	Exp072647	0	0
AMPH	Exp074392	0	0
AMPH	Exp074394	0	0
AMPH	Exp076155	0	0
AMPH	Exp076157	0	3.98791
AMPH	Exp076164	-4.40852	-4.69413
AMPH	Exp076166	-3.50375	4.56718
AMPH	Exp072624	0	0
AMPH	Exp076171	0	0
AMPH	Exp076178	0	0
AMPH	Exp076183	0	0
AMPH	Exp076185	0	0
AMPH	Exp076187	0	0
AMPH	Exp072626	0	0
AMPH	Exp076191	3.31686	0
AMPH	Exp076195	0	0
AMPH	Exp076200	0	0
AMPH	Exp076202	0	0
AMPH	Exp082884	-1.9168	0
AMPH	Exp072628	0	0
AMPH	Exp082890	-1.63262	0
AMPH	Exp082906	0	2.47602
AMPH	Exp082912	0	3.55818
AMPH	Exp082915	-5.17905	0
AMPH	Exp082921	-3.96077	0
AMPH	Exp072630	0	0
MAPT	Exp072645	0	-4.11039
MAPT	Exp072647	0	3.99442
MAPT	Exp074392	0	0
MAPT	Exp074394	0	0
MAPT	Exp076155	0	-5.67077
MAPT	Exp076157	0	0
MAPT	Exp076164	-4.40852	3.96998
MAPT	Exp076166	-3.50375	0
MAPT	Exp072624	0	0
MAPT	Exp076171	0	-3.20347
MAPT	Exp076178	0	0
MAPT	Exp076183	0	-2.77238
MAPT	Exp076185	0	0
MAPT	Exp076187	0	0
MAPT	Exp072626	0	0
MAPT	Exp076191	3.31686	0
MAPT	Exp076195	0	0
MAPT	Exp076200	0	0
MAPT	Exp076202	0	0
MAPT	Exp082884	-1.9168	0
MAPT	Exp072628	0	0
MAPT	Exp082890	-1.63262	-3.35507
MAPT	Exp082906	0	-3.49177
MAPT	Exp082912	0	0
MAPT	Exp082915	-5.17905	-4.1691
MAPT	Exp082921	-3.96077	0
MAPT	Exp072630	0	0
PRNP	Exp072645	0	-3.94427
PRNP	Exp072647	0	0
PRNP	Exp074392	0	0
PRNP	Exp074394	0	0
PRNP	Exp076155	0	0
PRNP	Exp076157	0	2.9955
PRNP	Exp076164	-4.40852	0
PRNP	Exp076166	-3.50375	0
PRNP	Exp072624	0	3.54688
PRNP	Exp076171	0	0
PRNP	Exp076178	0	3.15279
PRNP	Exp076183	0	0
PRNP	Exp076185	0	-4.8082
PRNP	Exp076187	0	0
PRNP	Exp072626	0	4.6052
PRNP	Exp076191	3.31686	0
PRNP	Exp076195	0	0
PRNP	Exp076200	0	-3.51339
PRNP	Exp076202	0	0
PRNP	Exp082884	-1.9168	0
PRNP	Exp072628	0	0
PRNP	Exp082890	-1.63262	4.34848
PRNP	Exp082906	0	-3.96168
PRNP	Exp082912	0	-5.6499
PRNP	Exp082915	-5.17905	0
PRNP	Exp082921	-3.96077	-4.21903
PRNP	Exp072630	0	0
SYN1	Exp072645	0	0
SYN1	Exp072647	0	0
SYN1	Exp074392	0	0
SYN1	Exp074394	0	4.42236
SYN1	Exp076155	0	4.48915
SYN1	Exp076157	0	-4.56126
SYN1	Exp076164	-4.40852	-5.0255
SYN1	Exp076166	-3.50375	0
SYN1	Exp072624	0	0
SYN1	Exp076171	0	0
SYN1	Exp076178	0	0
SYN1	Exp076183	0	-5.27223
SYN1	Exp076185	0	4.29604
SYN1	Exp076187	0	0
SYN1	Exp072626	0	0
SYN1	Exp076191	3.31686	0
SYN1	Exp076195	0	0
SYN1	Exp076200	0	0
SYN1	Exp076202	0	0
SYN1	Exp082884	-1.9168	1.03999
SYN1	Exp072628	0	0
SYN1	Exp082890	-1.63262	4.22774
SYN1	Exp082906	0	0
SYN1	Exp082912	0	0
SYN1	Exp082915	-5.17905	3.11307
SYN1	Exp082921	-3.96077	0
SYN1	Exp072630	0	0
