# Supplementary material for: Plasma proteomic profiling of pan-cancer patients discovers biomarkers of cancers
Source: Research Square preprint supplement (doi:10.21203/rs.3.rs-939549/v1), 2021-10-05
Supplement: Supplementary file 7 [file a25f5e3da46df52a8eefa2b0.xlsx]

## Sheet: Description
Sheet	Description
system-specific plasma proteins	A total of 1,323 system-specific plasma proteins expression pattern.
clusters	A total of 1,124 cluster-specifc plasma proteins.
system-specific plasma proteins
Columns	Description
Symbol	HUGO gene symbol
Digestive	system name
Excretory	system name
Immune	system name
Reproductive	system name
Respirato	system name
Urinary	system name
kruskal willis	kruskal test
kruskal_adjust	kruskal test adjusted p value of the six system
clusters
Columns	Description
Symbol	HUGO gene symbol
Cluster1	1 meas the protein is the cluster specific plasma protein, 0 represents not the specific cluster protein
Cluster2	1 meas the protein is the cluster specific plasma protein, 0 represents not the specific cluster protein
Cluster3	1 meas the protein is the cluster specific plasma protein, 0 represents not the specific cluster protein
Cluster4	1 meas the protein is the cluster specific plasma protein, 0 represents not the specific cluster protein

## Sheet: system-specific plasma proteins
Symbol	Digestive	Excretory	Immune	Reproductive	Respirato	Urinary	kruskal willis	kruskal-willis_adjust
AAAS	0.0920649	0.0380992	4.82e-06	0.160822	4.82e-06	4.82e-06	4.21037e-55	1.39652e-54
AAR2	4.82e-06	0.183977	4.82e-06	4.82e-06	3.00178	4.82e-06	4.52568e-202	8.06975e-200
AASDHPPT	4.82e-06	0.0117683	4.82e-06	4.82e-06	4.82e-06	4.82e-06	1.84103e-09	3.37109e-09
ABCA8	0.652346	0.811976	1.76239	0.632398	0.653836	4.82e-06	1.99083e-123	1.99894e-122
ABCB7	4.82e-06	4.82e-06	4.82e-06	0.185067	4.82e-06	4.82e-06	1.93461e-45	5.67113e-45
ABCB8	0.281389	4.82e-06	4.82e-06	4.82e-06	4.82e-06	4.82e-06	2.41365e-47	7.2733e-47
ABCC3	0.224592	4.82e-06	4.82e-06	4.82e-06	4.82e-06	0.384098	1.45677e-84	6.93005e-84
ABCC4	4.82e-06	0.00778808	4.82e-06	4.82e-06	4.82e-06	4.82e-06	3.04642e-15	6.0172e-15
ABCF3	0.773876	0.867716	0.835096	0.65556	2.25841	0.664921	1.25687e-30	3.16573e-30
ABI1	0.736811	0.0805246	4.82e-06	4.82e-06	4.82e-06	4.82e-06	7.86417e-70	3.03249e-69
ACAA1	4.82e-06	0.175863	4.82e-06	4.82e-06	0.473079	4.82e-06	2.99227e-184	2.00948e-182
ACAD10	0.229881	0.0299074	1.6412	0.402045	0.259505	0.390724	3.71637e-107	2.78512e-106
ACADM	0.310708	0.120523	1.64985	4.82e-06	0.706276	0.78594	3.96244e-117	3.52058e-116
ACADSB	4.82e-06	0.0660435	4.82e-06	4.82e-06	4.82e-06	4.82e-06	6.02135e-17	1.24049e-16
ACOT8	0.401033	4.82e-06	4.82e-06	4.82e-06	0.904076	4.82e-06	1.32034e-178	7.50272e-177
ACP2	4.82e-06	4.82e-06	4.82e-06	0.246551	4.82e-06	4.82e-06	3.13621e-104	2.04249e-103
ACSF3	4.82e-06	4.82e-06	4.82e-06	0.0196852	4.82e-06	4.82e-06	1.26783e-54	4.11805e-54
ACSL4	0.0576518	0.123482	4.82e-06	4.82e-06	4.82e-06	4.82e-06	5.38066e-147	1.00445e-145
ACSL6	4.82e-06	0.0269364	4.82e-06	4.82e-06	4.82e-06	4.82e-06	5.35817e-19	1.12722e-18
ACSM2B	4.82e-06	0.102693	4.82e-06	4.82e-06	4.82e-06	4.82e-06	3.04642e-15	6.0172e-15
ACSM3	4.82e-06	0.216211	4.82e-06	0.0816274	4.82e-06	4.82e-06	4.21486e-66	1.56349e-65
ACSM5	4.82e-06	4.82e-06	4.82e-06	2.04818	4.82e-06	4.82e-06	3.13621e-104	2.04249e-103
ACTR3C	0.323342	0.383386	0.418362	0.354248	0.455005	0.930619	4.69882e-15	9.26329e-15
ACTR6	0.489101	4.82e-06	1.04427	4.82e-06	4.82e-06	4.82e-06	2.27702e-162	7.49967e-161
ACYP1	4.82e-06	0.0389367	4.82e-06	4.82e-06	4.82e-06	4.82e-06	3.04642e-15	6.0172e-15
ADAP1	4.82e-06	4.82e-06	4.82e-06	4.82e-06	4.82e-06	4.60764	1.00689e-89	5.11455e-89
ADGRL2	0.697901	0.189844	0.502284	1.60997	0.275996	0.399855	3.06816e-36	8.14867e-36
ADH4	4.82e-06	0.221287	4.82e-06	1.34018	4.82e-06	4.82e-06	1.15507e-78	5.01182e-78
ADH7	4.82e-06	0.0540516	4.82e-06	4.82e-06	4.82e-06	4.82e-06	1.84103e-09	3.37109e-09
ADNP	4.82e-06	0.0125302	4.82e-06	4.82e-06	4.82e-06	4.82e-06	1.84103e-09	3.37109e-09
ADPGK	4.82e-06	0.0263153	0.585213	0.147547	0.0974096	0.146917	1.70703e-108	1.31747e-107
AGAP3	0.32889	0.554008	1.81012	0.279297	4.82e-06	0.420621	1.77219e-87	8.73594e-87
AGFG1	4.82e-06	4.82e-06	4.82e-06	4.82e-06	4.82e-06	0.778418	1.00689e-89	5.11455e-89
AGPAT3	4.82e-06	4.82e-06	4.82e-06	0.250021	4.82e-06	4.82e-06	3.13621e-104	2.04249e-103
AGTRAP	4.82e-06	0.761069	4.82e-06	4.82e-06	4.82e-06	1.90003	1.26916e-82	5.84921e-82
AGXT	4.82e-06	0.26347	4.82e-06	4.82e-06	4.82e-06	4.82e-06	6.83919e-30	1.69863e-29
AHCTF1	4.82e-06	4.82e-06	4.82e-06	0.0498013	4.82e-06	4.82e-06	1.26783e-54	4.11805e-54
AHSP	4.82e-06	0.0797855	4.82e-06	0.35502	4.82e-06	4.82e-06	1.63977e-78	7.08969e-78
AIF1L	4.82e-06	0.103568	4.82e-06	4.82e-06	4.82e-06	4.82e-06	1.84103e-09	3.37109e-09
AIFM2	4.82e-06	4.82e-06	4.82e-06	0.588423	4.82e-06	4.82e-06	1.26783e-54	4.11805e-54
AIG1	4.82e-06	0.0564846	4.82e-06	0.280492	4.82e-06	4.82e-06	5.18612e-82	2.36694e-81
AIP	0.17038	0.330321	0.213166	0.442328	0.36835	1.35189	7.18634e-35	1.88728e-34
AK3	0.484208	0.0302443	1.59495	0.569633	0.651464	0.341813	4.6489e-84	2.19138e-83
AK4	0.40039	0.480787	1.59513	0.104742	4.82e-06	0.662266	2.26721e-116	1.9737e-115
AK5	0.0774714	0.020085	4.82e-06	0.176999	4.82e-06	0.0628557	5.75859e-55	1.90516e-54
AKAP8	0.197183	0.186428	0.642839	4.82e-06	4.82e-06	1.76026	1.80694e-159	5.27893e-158
AKR7A3	4.82e-06	0.0322376	4.82e-06	4.82e-06	4.82e-06	4.82e-06	8.52066e-26	1.93928e-25
ALDH1L2	4.82e-06	0.0120823	4.82e-06	0.0260182	4.82e-06	4.82e-06	4.97304e-30	1.2435e-29
ALDH3B1	4.82e-06	4.82e-06	4.82e-06	0.0725685	4.82e-06	4.82e-06	1.93461e-45	5.67113e-45
ALDH4A1	0.441977	0.607104	0.857309	2.17365	0.381675	0.637459	1.9628e-13	3.80137e-13
ALOX5AP	4.82e-06	4.82e-06	4.82e-06	4.82e-06	1.44479	4.82e-06	1.5633e-216	4.49102e-214
ALPP	0.162626	0.110872	0.375809	0.0308321	4.82e-06	0.147818	4.22707e-122	4.12419e-121
AMPD3	0.719932	0.339602	0.651667	1.4706	0.37776	0.289581	1.46603e-40	4.0496e-40
AMPH	0.0634248	4.82e-06	4.82e-06	4.82e-06	4.82e-06	4.82e-06	3.86899e-42	1.08085e-41
ANAPC1	0.0617434	0.114476	0.709058	0.134287	4.82e-06	0.0215994	1.62943e-97	9.72952e-97
ANGPTL2	4.82e-06	0.0836429	4.82e-06	4.82e-06	4.82e-06	4.82e-06	5.35817e-19	1.12722e-18
ANKRD44	4.82e-06	0.0506782	4.82e-06	4.82e-06	4.82e-06	4.82e-06	8.52066e-26	1.93928e-25
ANKS1A	4.82e-06	4.82e-06	4.82e-06	0.0618378	4.82e-06	4.82e-06	3.13621e-104	2.04249e-103
ANTXR2	0.0431899	0.023354	0.247959	0.0474489	4.82e-06	4.82e-06	2.14814e-132	2.70927e-131
ANXA8	4.82e-06	0.18916	4.82e-06	4.82e-06	4.82e-06	4.82e-06	8.52066e-26	1.93928e-25
ANXA8L1	4.82e-06	0.148522	4.82e-06	4.82e-06	4.82e-06	4.82e-06	8.52066e-26	1.93928e-25
AOX1	0.20166	0.0928232	4.82e-06	4.82e-06	4.82e-06	4.82e-06	1.90776e-50	5.9428e-50
AP2S1	0.262658	4.82e-06	4.82e-06	4.82e-06	4.82e-06	1.73495	6.59396e-187	5.01432e-185
AP5B1	0.163421	0.183611	0.642274	0.132569	0.124344	0.153227	1.05868e-21	2.32855e-21
APAF1	0.0527986	0.0278396	0.356555	0.0807541	0.147602	4.82e-06	5.52094e-145	9.91277e-144
AQP2	4.82e-06	0.129385	4.82e-06	4.82e-06	4.82e-06	4.82e-06	1.84103e-09	3.37109e-09
AQP9	4.82e-06	0.154042	4.82e-06	4.82e-06	4.82e-06	4.82e-06	1.84103e-09	3.37109e-09
ARFGAP1	4.82e-06	0.02781	0.174891	4.82e-06	4.82e-06	4.82e-06	1.92731e-190	1.60743e-188
ARFGEF2	0.0339626	0.0483583	4.82e-06	0.473433	0.166748	0.215645	5.51373e-111	4.40673e-110
ARHGAP26	4.82e-06	4.82e-06	4.82e-06	0.925162	4.82e-06	4.82e-06	1.26783e-54	4.11805e-54
ARHGAP27	0.147117	0.0501426	4.82e-06	4.82e-06	4.82e-06	4.82e-06	5.35654e-59	1.84044e-58
ARHGAP5	4.82e-06	4.82e-06	0.185073	4.82e-06	4.82e-06	4.82e-06	9.15363e-220	9.46669e-217
ARHGAP9	4.82e-06	0.109289	4.82e-06	4.82e-06	4.82e-06	4.82e-06	3.04642e-15	6.0172e-15
ARHGEF10	4.82e-06	4.82e-06	4.82e-06	0.258904	4.82e-06	4.82e-06	3.13621e-104	2.04249e-103
ARHGEF10L	0.334445	0.181519	0.35403	0.318531	0.160304	0.979965	1.36629e-34	3.57364e-34
ARHGEF17	4.82e-06	4.82e-06	4.82e-06	0.117202	4.82e-06	4.82e-06	3.13621e-104	2.04249e-103
ARHGEF40	4.82e-06	4.82e-06	4.82e-06	4.82e-06	4.82e-06	0.169086	1.92009e-97	1.10689e-96
ARID1A	0.322036	1.18687	4.82e-06	4.82e-06	0.236571	0.384226	1.67354e-105	1.22057e-104
ARID1B	4.82e-06	4.82e-06	4.82e-06	0.019929	4.82e-06	4.82e-06	1.93461e-45	5.67113e-45
ARMC6	4.82e-06	0.00746081	4.82e-06	4.82e-06	4.82e-06	4.82e-06	1.84103e-09	3.37109e-09
ARMH3	4.82e-06	0.0109374	4.82e-06	4.82e-06	4.82e-06	4.82e-06	1.84103e-09	3.37109e-09
ARSD	4.82e-06	0.102278	4.82e-06	4.82e-06	4.82e-06	4.82e-06	7.23956e-43	2.06599e-42
ARSL	4.82e-06	0.0394772	4.82e-06	4.82e-06	4.82e-06	4.82e-06	8.52066e-26	1.93928e-25
ASCC1	4.82e-06	0.0573792	4.82e-06	4.82e-06	4.82e-06	4.82e-06	8.52066e-26	1.93928e-25
ASCC2	4.82e-06	0.284347	4.82e-06	0.0897328	4.82e-06	4.82e-06	2.86536e-22	6.32384e-22
ASMTL	4.82e-06	0.0237763	4.82e-06	4.82e-06	4.82e-06	4.82e-06	5.35817e-19	1.12722e-18
ASPSCR1	4.82e-06	0.0135084	4.82e-06	4.82e-06	4.82e-06	0.0833399	7.08617e-86	3.44709e-85
ATAT1	0.425232	4.82e-06	4.82e-06	4.82e-06	4.82e-06	4.82e-06	3.86899e-42	1.08085e-41
ATF6B	4.82e-06	0.0212711	4.82e-06	4.82e-06	4.82e-06	4.82e-06	8.52066e-26	1.93928e-25
ATG3	4.82e-06	4.82e-06	4.82e-06	4.82e-06	4.82e-06	0.270237	1.00689e-89	5.11455e-89
ATL1	4.82e-06	4.82e-06	4.82e-06	4.82e-06	4.82e-06	0.217474	1.00689e-89	5.11455e-89
ATP11A	4.82e-06	4.82e-06	4.82e-06	4.82e-06	4.82e-06	0.178926	1.92009e-97	1.10689e-96
ATP13A2	2.16822	4.82e-06	4.82e-06	4.82e-06	4.82e-06	4.82e-06	2.41365e-47	7.2733e-47
ATP1B3	2.67194	0.203713	4.82e-06	0.671766	4.82e-06	0.380757	1.09143e-79	4.82376e-79
ATP2B2	0.162182	0.0374645	4.82e-06	0.148635	4.82e-06	0.393466	5.6179e-95	3.14396e-94
ATP5ME	4.82e-06	4.82e-06	4.82e-06	4.82e-06	4.82e-06	4.98103	1.92009e-97	1.10689e-96
ATP5MG	2.64385	1.69859	4.82e-06	0.9229	2.0157	6.49739	1.86359e-98	1.12315e-97
ATP5PB	0.224265	0.486987	1.02621	0.206702	0.280237	0.303535	1.6506e-27	4.01658e-27
ATP6V1C1	0.395032	0.326362	1.67595	0.464973	0.377072	0.0818339	6.92913e-54	2.23661e-53
ATP6V1D	4.82e-06	4.82e-06	4.82e-06	4.82e-06	4.82e-06	0.412561	1.00689e-89	5.11455e-89
ATP6V1G1	4.82e-06	4.82e-06	4.82e-06	0.481531	4.82e-06	4.82e-06	3.13621e-104	2.04249e-103
ATP6V1H	0.857543	3.37375	1.04918	0.0753872	4.82e-06	4.82e-06	1.52803e-147	2.94831e-146
ATP8A1	4.82e-06	0.0493798	4.82e-06	4.82e-06	4.82e-06	4.82e-06	8.52066e-26	1.93928e-25
ATPAF2	4.82e-06	4.82e-06	4.82e-06	1.01742	4.82e-06	4.82e-06	3.13621e-104	2.04249e-103
ATRX	0.131628	0.0336349	4.82e-06	4.82e-06	4.82e-06	4.82e-06	3.5143e-55	1.16715e-54
AUH	4.82e-06	0.214899	4.82e-06	4.82e-06	4.82e-06	4.82e-06	7.23956e-43	2.06599e-42
AVL9	4.82e-06	0.0234036	4.82e-06	4.82e-06	4.82e-06	4.82e-06	1.84103e-09	3.37109e-09
B3GNT8	0.0565962	0.0221885	4.82e-06	4.82e-06	0.336629	4.82e-06	2.80352e-168	1.15976e-166
BAALC	0.118074	4.82e-06	0.481978	4.82e-06	4.82e-06	4.82e-06	7.20801e-170	3.08038e-168
BAG6	0.247369	0.247218	0.237711	2.10017	0.541678	0.33608	0.000265666	0.000465523
BAK1	2.15081	0.346614	4.82e-06	4.82e-06	4.82e-06	5.08263	5.11613e-154	1.28425e-152
BCKDHB	4.82e-06	0.18781	1.24357	4.82e-06	0.135155	4.82e-06	4.11639e-186	2.998e-184
BCL2	0.348554	0.1046	0.759626	4.82e-06	4.82e-06	4.82e-06	1.73818e-137	2.54621e-136
BCL2L13	0.0387229	0.107054	4.82e-06	4.82e-06	4.82e-06	4.82e-06	1.9362e-76	8.10697e-76
BCR	4.82e-06	0.0329084	4.82e-06	4.82e-06	0.738925	4.82e-06	4.99955e-202	8.61756e-200
BDH1	4.82e-06	4.82e-06	4.82e-06	0.334497	4.82e-06	4.82e-06	3.13621e-104	2.04249e-103
BICD2	4.82e-06	0.0244346	4.82e-06	4.82e-06	4.82e-06	4.82e-06	7.23956e-43	2.06599e-42
BLK	4.82e-06	4.82e-06	4.82e-06	4.82e-06	4.82e-06	0.337674	1.16207e-215	2.7314e-213
BLOC1S1	4.82e-06	2.16194	4.82e-06	4.82e-06	4.82e-06	4.82e-06	5.35817e-19	1.12722e-18
BLOC1S2	4.82e-06	0.148813	4.82e-06	4.82e-06	4.82e-06	4.82e-06	5.35817e-19	1.12722e-18
BLOC1S4	0.175992	0.0316073	1.29072	0.069987	0.246221	4.82e-06	2.03606e-136	2.84553e-135
BMS1	4.82e-06	0.0300668	4.82e-06	4.82e-06	4.82e-06	4.82e-06	7.23956e-43	2.06599e-42
BNIP2	4.82e-06	4.82e-06	4.82e-06	0.124032	4.82e-06	4.82e-06	1.93461e-45	5.67113e-45
BPNT1	0.780809	1.3075	1.01753	3.3033	1.19145	0.910257	3.46534e-08	6.26987e-08
BPTF	4.82e-06	4.82e-06	4.82e-06	0.118026	4.82e-06	4.82e-06	3.13621e-104	2.04249e-103
BRD3	4.82e-06	4.82e-06	4.82e-06	0.198232	4.82e-06	4.82e-06	1.93461e-45	5.67113e-45
BRD4	4.82e-06	0.01165	4.82e-06	4.82e-06	4.82e-06	4.82e-06	3.04642e-15	6.0172e-15
BRD7	4.82e-06	0.315581	4.82e-06	4.82e-06	4.82e-06	4.82e-06	1.84103e-09	3.37109e-09
BSG	0.329208	0.0331538	4.82e-06	1.44795	3.4656	0.605895	4.92039e-141	7.8772e-140
BSN	4.82e-06	0.00879515	4.82e-06	4.82e-06	4.82e-06	4.82e-06	1.84103e-09	3.37109e-09
BST2	4.82e-06	0.0522834	4.82e-06	0.171768	4.82e-06	4.82e-06	3.4026e-32	8.68882e-32
BTF3L4	0.39111	0.922035	0.957444	0.399964	3.35294	0.255498	2.1231e-66	7.90963e-66
BTN3A3	4.82e-06	0.301243	4.82e-06	4.82e-06	4.82e-06	4.82e-06	8.52066e-26	1.93928e-25
BZW2	0.418471	0.455654	0.207931	0.326478	0.139537	2.9578	2.84214e-43	8.21503e-43
C11orf54	4.82e-06	0.0382086	4.82e-06	4.82e-06	4.82e-06	0.716242	3.00682e-74	1.22235e-73
C17orf49	0.715803	0.184375	4.82e-06	0.278019	4.82e-06	4.82e-06	2.11104e-57	7.15814e-57
C1orf116	0.367511	4.82e-06	4.82e-06	4.82e-06	4.82e-06	4.82e-06	1.30969e-95	7.43401e-95
C1orf52	4.82e-06	4.82e-06	4.82e-06	0.323899	4.82e-06	4.82e-06	3.13621e-104	2.04249e-103
C4orf33	4.82e-06	4.82e-06	4.82e-06	1.22365	4.82e-06	4.82e-06	3.13621e-104	2.04249e-103
C7orf26	0.0497413	4.82e-06	4.82e-06	4.82e-06	4.82e-06	4.82e-06	3.86899e-42	1.08085e-41
C7orf50	4.82e-06	4.82e-06	4.82e-06	0.224008	4.82e-06	4.82e-06	3.13621e-104	2.04249e-103
CA9	4.82e-06	4.82e-06	4.82e-06	3.98754	4.82e-06	4.82e-06	3.13621e-104	2.04249e-103
CAB39L	0.795092	0.0307198	4.82e-06	0.205255	4.82e-06	4.82e-06	1.18837e-76	5.00412e-76
CACYBP	4.82e-06	0.0131996	4.82e-06	4.82e-06	4.82e-06	4.82e-06	1.84103e-09	3.37109e-09
CALB2	4.82e-06	0.0145777	4.82e-06	4.82e-06	4.82e-06	4.82e-06	8.52066e-26	1.93928e-25
CALML4	0.123809	0.132943	0.741449	4.82e-06	4.82e-06	4.82e-06	2.18416e-153	5.32751e-152
CAMK1	0.21076	4.82e-06	4.82e-06	4.82e-06	4.82e-06	4.82e-06	3.86899e-42	1.08085e-41
CAMK2B	4.82e-06	0.00850168	4.82e-06	4.82e-06	4.82e-06	4.82e-06	8.52066e-26	1.93928e-25
CAMK2G	4.82e-06	0.00960776	4.82e-06	4.82e-06	4.82e-06	4.82e-06	8.52066e-26	1.93928e-25
CAMK4	4.82e-06	0.712756	4.82e-06	4.82e-06	4.82e-06	4.82e-06	6.61986e-17	1.36325e-16
CAMKV	4.82e-06	0.0235562	4.82e-06	4.82e-06	4.82e-06	4.82e-06	8.52066e-26	1.93928e-25
CAMSAP3	0.154194	0.0354043	4.82e-06	4.82e-06	4.82e-06	4.82e-06	5.96035e-51	1.86568e-50
CAND2	4.82e-06	4.82e-06	4.82e-06	4.82e-06	4.82e-06	0.124539	1.92009e-97	1.10689e-96
CARD8	4.82e-06	4.82e-06	4.82e-06	4.82e-06	4.82e-06	0.212374	1.92009e-97	1.10689e-96
CARHSP1	4.82e-06	4.82e-06	4.82e-06	1.05405	4.82e-06	4.82e-06	1.93461e-45	5.67113e-45
CARM1	4.82e-06	1.72177	4.82e-06	4.82e-06	4.82e-06	4.82e-06	6.62426e-15	1.30293e-14
CARMIL1	0.290404	4.82e-06	4.82e-06	0.041319	4.82e-06	4.82e-06	1.86927e-41	5.19398e-41
CASC4	4.82e-06	0.0313836	4.82e-06	4.82e-06	4.82e-06	4.82e-06	5.35817e-19	1.12722e-18
CASP6	4.82e-06	4.82e-06	4.82e-06	0.319611	4.82e-06	4.82e-06	1.26783e-54	4.11805e-54
CAV1	0.213447	4.82e-06	4.82e-06	4.82e-06	4.82e-06	4.82e-06	2.41365e-47	7.2733e-47
CBFB	0.396677	4.82e-06	4.82e-06	4.82e-06	4.82e-06	4.82e-06	2.41365e-47	7.2733e-47
CBX8	4.82e-06	0.258121	4.82e-06	4.82e-06	4.82e-06	4.82e-06	6.83919e-30	1.69863e-29
CCAR1	0.259527	0.186022	0.259158	1.01737	0.213093	0.181183	3.13772e-18	6.52923e-18
CCDC22	0.317656	0.216589	4.11744	0.284214	0.414616	0.548621	2.44746e-23	5.45981e-23
CCDC51	0.254577	4.82e-06	4.82e-06	4.82e-06	4.82e-06	4.82e-06	3.86899e-42	1.08085e-41
CCDC97	4.82e-06	0.0406883	4.82e-06	4.82e-06	4.82e-06	4.82e-06	8.52066e-26	1.93928e-25
CD151	0.336051	0.0568373	4.82e-06	4.82e-06	4.82e-06	4.82e-06	2.0005e-43	5.79203e-43
CD177	0.245484	0.0245203	4.82e-06	4.82e-06	4.82e-06	4.82e-06	5.80087e-37	1.5526e-36
CD209	4.82e-06	0.128402	4.82e-06	4.82e-06	4.82e-06	4.82e-06	8.52066e-26	1.93928e-25
CD48	4.82e-06	0.267343	4.82e-06	4.82e-06	4.82e-06	4.82e-06	8.52066e-26	1.93928e-25
CD9	2.06575	5.99081	3.19578	0.783409	1.47425	2.00434	5.23701e-15	1.03164e-14
CDC23	0.470489	0.898348	4.82e-06	0.18633	4.82e-06	4.82e-06	1.5706e-106	1.16355e-105
CDC42EP1	1.02789	0.612676	5.852	1.20293	4.82e-06	0.244188	2.03542e-105	1.48242e-104
CDIPT	4.82e-06	4.82e-06	1.62028	0.248069	4.82e-06	4.82e-06	3.39956e-194	3.31681e-192
CDK12	4.82e-06	0.0167931	4.82e-06	4.82e-06	4.82e-06	4.82e-06	5.35817e-19	1.12722e-18
CDK13	4.82e-06	0.0262537	4.82e-06	4.82e-06	4.82e-06	4.82e-06	5.35817e-19	1.12722e-18
CDK14	4.82e-06	4.82e-06	4.82e-06	4.82e-06	0.801437	4.82e-06	1.5633e-216	4.49102e-214
CDK2AP1	4.82e-06	0.0417308	4.82e-06	4.82e-06	4.82e-06	4.82e-06	3.04642e-15	6.0172e-15
CDKAL1	0.159408	4.82e-06	4.82e-06	4.82e-06	4.82e-06	4.82e-06	2.41365e-47	7.2733e-47
CDKN2C	4.82e-06	4.82e-06	4.82e-06	4.82e-06	4.82e-06	14.131	1.92009e-97	1.10689e-96
CDS2	0.0945308	0.101769	4.82e-06	0.039175	4.82e-06	4.82e-06	1.29086e-58	4.4118e-58
CEBPZ	4.82e-06	0.0282413	4.82e-06	4.82e-06	4.82e-06	4.82e-06	3.04642e-15	6.0172e-15
CELA2A	4.82e-06	0.0814394	4.82e-06	4.82e-06	4.82e-06	2.20736	1.54963e-202	2.86183e-200
CELA2B	4.82e-06	4.82e-06	4.82e-06	4.82e-06	4.82e-06	2.22574	1.16207e-215	2.7314e-213
CELF2	4.82e-06	4.82e-06	4.82e-06	4.82e-06	1.39697	2.88548	4.3419e-137	6.2715e-136
CENPV	4.82e-06	0.328914	4.82e-06	4.82e-06	0.669066	4.82e-06	5.75718e-176	3.13373e-174
CEP170B	0.0493446	0.0074376	4.82e-06	4.82e-06	4.82e-06	4.82e-06	2.59784e-33	6.72344e-33
CEP350	4.82e-06	4.82e-06	4.82e-06	4.82e-06	4.82e-06	0.155566	1.00689e-89	5.11455e-89
CEP63	0.0434332	0.332857	0.201893	0.0897955	0.117893	4.82e-06	1.81373e-140	2.82494e-139
CERT1	0.236508	0.508652	4.82e-06	0.351947	4.82e-06	1.04651	1.66858e-134	2.21805e-133
CFAP20	4.82e-06	4.82e-06	4.82e-06	4.82e-06	4.82e-06	0.347606	1.00689e-89	5.11455e-89
CFAP410	0.427012	0.305561	1.27575	0.286182	0.448649	0.544704	4.90043e-19	1.05848e-18
CHAMP1	4.82e-06	0.125278	4.82e-06	4.82e-06	4.82e-06	4.82e-06	3.04642e-15	6.0172e-15
CHCHD2	4.82e-06	0.0470712	4.82e-06	4.82e-06	4.82e-06	4.82e-06	3.04642e-15	6.0172e-15
CHCHD2P9	4.82e-06	0.0396149	4.82e-06	4.82e-06	4.82e-06	4.82e-06	3.04642e-15	6.0172e-15
CHCHD4	4.82e-06	2.37559	4.82e-06	4.82e-06	4.82e-06	4.82e-06	1.84103e-09	3.37109e-09
CHD1	4.82e-06	0.0325364	4.82e-06	4.82e-06	4.82e-06	4.82e-06	1.879e-30	4.72582e-30
CHD3	0.0485228	0.15913	0.334549	0.0313434	4.82e-06	4.82e-06	9.21904e-139	1.38179e-137
CHD5	4.82e-06	4.82e-06	0.144423	4.82e-06	4.82e-06	4.82e-06	9.15363e-220	9.46669e-217
CHDH	0.122139	0.0792169	4.82e-06	0.432238	4.82e-06	0.133989	2.01648e-57	6.8465e-57
CHI3L2	0.140801	4.82e-06	4.82e-06	4.82e-06	4.82e-06	4.82e-06	3.86899e-42	1.08085e-41
CHID1	4.82e-06	0.0541751	4.82e-06	4.82e-06	4.82e-06	0.192443	3.07944e-62	1.09592e-61
CHKB	0.25305	4.82e-06	4.82e-06	0.0942743	4.82e-06	4.82e-06	6.52293e-44	1.89815e-43
CHMP3	0.211023	0.257345	1.80106	4.82e-06	4.82e-06	4.82e-06	1.12026e-148	2.25403e-147
CHUK	4.82e-06	0.042234	4.82e-06	4.82e-06	4.82e-06	4.82e-06	8.52066e-26	1.93928e-25
CIAO2B	4.82e-06	0.124485	4.82e-06	4.82e-06	4.82e-06	4.82e-06	5.35817e-19	1.12722e-18
CIAPIN1	4.82e-06	0.0150349	4.82e-06	4.82e-06	4.82e-06	4.82e-06	8.52066e-26	1.93928e-25
CKMT2	4.82e-06	4.82e-06	4.82e-06	0.0318886	4.82e-06	4.82e-06	1.93461e-45	5.67113e-45
CLCA4	4.82e-06	0.0818606	4.82e-06	4.82e-06	4.82e-06	4.82e-06	1.84103e-09	3.37109e-09
CLDN3	4.82e-06	4.82e-06	4.82e-06	0.87279	4.82e-06	4.82e-06	3.13621e-104	2.04249e-103
CLEC4M	4.82e-06	0.0481555	4.82e-06	4.82e-06	4.82e-06	4.82e-06	8.52066e-26	1.93928e-25
CLIC2	4.82e-06	0.0946134	4.82e-06	0.154264	0.528727	4.82e-06	6.05436e-174	3.0103e-172
CLINT1	0.338552	0.0996107	4.82e-06	0.466355	4.82e-06	1.0229	2.80639e-156	7.67822e-155
CLMN	2.32263	2.02263	1.91893	2.07014	2.00486	4.54082	3.74861e-27	9.07492e-27
CLPB	1.06691	1.08221	3.64528	0.727798	4.82e-06	1.09579	3.97246e-80	1.76626e-79
CLPTM1L	4.82e-06	4.82e-06	4.82e-06	0.0748275	4.82e-06	0.208188	3.83978e-84	1.81494e-83
CLTA	0.266494	0.195525	4.82e-06	0.110224	4.82e-06	4.82e-06	1.53756e-43	4.45419e-43
CMA1	4.82e-06	4.82e-06	4.82e-06	0.323019	4.82e-06	4.82e-06	3.13621e-104	2.04249e-103
CMAS	1.45446	1.71367	5.84296	0.26924	1.56373	2.64207	7.01104e-44	2.03904e-43
CNOT10	4.82e-06	0.0490964	4.82e-06	0.260333	4.82e-06	4.82e-06	3.79169e-32	9.66806e-32
CNPY2	1.14938	0.250279	1.27787	0.916253	3.28759	0.813771	2.46054e-79	1.08377e-78
CNPY3	4.82e-06	4.82e-06	4.82e-06	4.82e-06	0.691383	4.82e-06	1.5633e-216	4.49102e-214
CNPY4	4.82e-06	0.0477877	4.82e-06	4.82e-06	4.82e-06	4.82e-06	1.84103e-09	3.37109e-09
CNTN2	4.82e-06	0.0719579	0.541372	4.82e-06	4.82e-06	4.82e-06	6.00277e-164	2.04213e-162
CNTN3	4.82e-06	4.82e-06	4.82e-06	0.211199	4.82e-06	0.0645684	5.06181e-104	3.27969e-103
CNTN4	0.315086	0.268329	0.710539	0.107972	4.82e-06	0.189333	1.45371e-112	1.1838e-111
CNTNAP1	4.82e-06	4.82e-06	4.82e-06	0.181008	4.82e-06	4.82e-06	3.13621e-104	2.04249e-103
COA3	4.82e-06	0.208743	4.82e-06	4.82e-06	4.82e-06	1.78906	1.19422e-198	1.62508e-196
COA7	4.82e-06	0.100507	4.82e-06	1.34526	4.82e-06	4.82e-06	7.96299e-143	1.34126e-141
COBLL1	4.82e-06	0.0060229	4.82e-06	4.82e-06	4.82e-06	4.82e-06	3.04642e-15	6.0172e-15
COL6A5	0.195643	0.145964	0.128593	0.720896	0.174394	4.82e-06	6.60509e-131	8.03645e-130
COL8A1	0.139582	0.0393708	4.82e-06	4.82e-06	4.82e-06	4.82e-06	1.79646e-108	1.38443e-107
COLGALT1	0.222141	0.026136	0.464656	0.141304	0.227932	4.82e-06	3.02477e-118	2.76833e-117
COMMD2	4.82e-06	4.82e-06	4.82e-06	0.256493	4.82e-06	4.82e-06	1.93461e-45	5.67113e-45
COMMD4	4.82e-06	4.82e-06	4.82e-06	4.82e-06	0.641196	4.82e-06	1.5633e-216	4.49102e-214
COPE	0.117884	4.82e-06	4.82e-06	4.82e-06	4.82e-06	4.82e-06	3.86899e-42	1.08085e-41
COPS5	1.85092	2.41413	1.13478	1.72802	2.06619	19.0266	1.24233e-67	4.6823e-67
COPS7A	4.82e-06	4.82e-06	4.82e-06	1.02696	4.82e-06	4.82e-06	3.13621e-104	2.04249e-103
COPS7B	4.82e-06	0.735434	4.82e-06	4.82e-06	4.82e-06	4.82e-06	6.54523e-24	1.46517e-23
COPS8	4.82e-06	0.22914	2.01484	4.82e-06	4.82e-06	4.82e-06	8.98967e-188	7.04327e-186
COPZ1	0.434803	0.980377	0.496107	0.304516	0.2183	0.302168	2.41346e-16	4.94063e-16
COQ10B	4.82e-06	0.00960948	4.82e-06	4.82e-06	4.82e-06	4.82e-06	3.04642e-15	6.0172e-15
COQ7	4.82e-06	0.273444	4.82e-06	4.82e-06	4.82e-06	4.82e-06	8.52066e-26	1.93928e-25
CORO2B	4.82e-06	0.0344715	4.82e-06	4.82e-06	4.82e-06	4.82e-06	3.04642e-15	6.0172e-15
COX1	4.82e-06	0.133595	4.82e-06	4.82e-06	4.82e-06	4.82e-06	1.84103e-09	3.37109e-09
CPD	4.82e-06	0.0487587	4.82e-06	4.82e-06	4.82e-06	4.82e-06	6.83919e-30	1.69863e-29
CPSF2	3.66748	0.18952	0.982981	4.82e-06	0.201841	4.82e-06	9.85551e-154	2.45014e-152
CPSF3	0.223111	4.82e-06	4.82e-06	4.82e-06	4.82e-06	0.563417	1.05868e-71	4.18215e-71
CPSF4	4.82e-06	4.82e-06	4.82e-06	4.82e-06	4.82e-06	0.245927	1.00689e-89	5.11455e-89
CPSF7	4.82e-06	0.0252614	4.82e-06	4.82e-06	4.82e-06	4.82e-06	1.84103e-09	3.37109e-09
CR1L	4.82e-06	0.0270681	0.218923	4.82e-06	4.82e-06	4.82e-06	1.8495e-160	5.56033e-159
CRABP2	0.205001	4.82e-06	4.82e-06	4.82e-06	4.82e-06	4.82e-06	3.86899e-42	1.08085e-41
CREBBP	4.82e-06	0.00375261	4.82e-06	4.82e-06	4.82e-06	4.82e-06	1.84103e-09	3.37109e-09
CREG1	4.82e-06	0.0312828	4.82e-06	4.82e-06	4.82e-06	4.82e-06	5.35817e-19	1.12722e-18
CRNKL1	4.82e-06	4.82e-06	4.82e-06	4.82e-06	4.82e-06	0.20037	1.00689e-89	5.11455e-89
CRNN	4.82e-06	0.0113365	4.82e-06	4.82e-06	4.82e-06	4.82e-06	1.84103e-09	3.37109e-09
CRTAP	4.82e-06	0.0527413	4.82e-06	0.345908	4.82e-06	4.82e-06	1.5564e-28	3.82882e-28
CRYBG1	4.82e-06	0.0200116	4.82e-06	4.82e-06	4.82e-06	4.82e-06	3.04642e-15	6.0172e-15
CRYM	4.82e-06	0.124869	4.82e-06	0.183009	4.82e-06	0.665882	6.95446e-64	2.50778e-63
CSNK1A1L	0.0958607	0.202502	4.82e-06	0.43742	4.82e-06	4.82e-06	6.75834e-148	1.32377e-146
CSNK1D	0.119098	0.0444491	4.82e-06	4.82e-06	4.82e-06	4.82e-06	1.23206e-87	6.09079e-87
CSNK1E	0.0866386	0.0265738	4.82e-06	4.82e-06	4.82e-06	4.82e-06	1.23206e-87	6.09079e-87
CST1	4.82e-06	0.0629349	4.82e-06	4.82e-06	4.82e-06	4.82e-06	3.04642e-15	6.0172e-15
CST4	4.82e-06	0.0542342	4.82e-06	4.82e-06	4.82e-06	4.82e-06	3.04642e-15	6.0172e-15
CTAGE1	4.82e-06	0.0247912	4.82e-06	4.82e-06	4.82e-06	4.82e-06	8.52066e-26	1.93928e-25
CTHRC1	4.82e-06	4.82e-06	4.82e-06	0.217731	4.82e-06	4.82e-06	1.93461e-45	5.67113e-45
CTNNA2	0.127255	0.021992	4.82e-06	0.466847	4.82e-06	0.101925	4.07535e-106	3.00623e-105
CUL1	0.0547249	4.82e-06	4.82e-06	0.124198	4.82e-06	4.82e-06	4.71923e-41	1.30778e-40
CUX1	0.748286	0.226631	4.82e-06	0.0396776	4.82e-06	0.195239	6.11873e-77	2.59131e-76
CUZD1	4.82e-06	4.82e-06	4.82e-06	4.82e-06	4.82e-06	1.60263	1.00689e-89	5.11455e-89
CWC15	4.82e-06	0.0285445	4.82e-06	4.82e-06	4.82e-06	4.82e-06	8.52066e-26	1.93928e-25
CYBB	1.00108	2.78196	1.58914	0.573668	4.82e-06	6.40084	3.37235e-131	4.14215e-130
CYLD	4.82e-06	0.0578802	4.82e-06	4.82e-06	4.82e-06	4.82e-06	3.04642e-15	6.0172e-15
CYP3A5	0.286221	4.82e-06	4.82e-06	4.82e-06	4.82e-06	4.82e-06	2.41365e-47	7.2733e-47
CYRIA	5.47574	0.479555	4.82e-06	0.291219	0.22452	0.0830336	3.01325e-67	1.12828e-66
CZIB	0.861521	0.0669405	4.82e-06	4.82e-06	4.82e-06	4.82e-06	3.2428e-59	1.12014e-58
DAB2	4.82e-06	0.0202126	4.82e-06	4.82e-06	4.82e-06	4.82e-06	3.04642e-15	6.0172e-15
DAGLB	4.82e-06	0.142557	4.82e-06	4.82e-06	4.82e-06	4.82e-06	1.84103e-09	3.37109e-09
DAP3	4.82e-06	0.0175477	4.82e-06	0.420911	4.82e-06	4.82e-06	7.94547e-85	3.80074e-84
DAXX	4.82e-06	4.82e-06	4.82e-06	4.82e-06	4.82e-06	0.34908	1.00689e-89	5.11455e-89
DBT	4.82e-06	0.157669	0.625449	0.0364334	4.82e-06	4.82e-06	1.14949e-153	2.84403e-152
DCAF1	4.82e-06	4.82e-06	4.82e-06	0.0811609	4.82e-06	0.198597	1.15598e-83	5.39007e-83
DCAKD	3.28821	4.82e-06	4.82e-06	4.82e-06	12.7311	5.65276	8.73721e-125	9.03602e-124
DCLK1	4.82e-06	4.82e-06	4.82e-06	4.82e-06	4.82e-06	0.218799	1.00689e-89	5.11455e-89
DCLK2	0.0320481	4.82e-06	4.82e-06	0.288222	4.82e-06	4.82e-06	5.00461e-38	1.35633e-37
DCP1A	4.82e-06	0.0141345	4.82e-06	4.82e-06	4.82e-06	4.82e-06	1.84103e-09	3.37109e-09
DCXR	0.425134	0.31715	0.240889	0.245766	4.82e-06	0.138963	5.54436e-107	4.13707e-106
DDB2	4.82e-06	0.0500324	4.82e-06	4.82e-06	4.82e-06	4.82e-06	8.52066e-26	1.93928e-25
DDC	0.293005	0.068744	4.82e-06	4.82e-06	4.82e-06	4.82e-06	5.05399e-51	1.58581e-50
DDX20	4.82e-06	0.0384181	4.82e-06	4.82e-06	4.82e-06	4.82e-06	3.04642e-15	6.0172e-15
DDX24	0.11348	4.82e-06	4.82e-06	0.204099	4.82e-06	4.82e-06	5.05511e-38	1.3693e-37
DDX47	0.105062	0.0743155	4.82e-06	0.037915	4.82e-06	4.82e-06	1.4383e-47	4.39305e-47
DDX50	4.82e-06	0.0909223	4.82e-06	4.82e-06	4.82e-06	4.82e-06	5.35817e-19	1.12722e-18
DDX54	4.82e-06	0.159993	0.653376	0.269251	4.82e-06	4.82e-06	4.10374e-162	1.3099e-160
DDX56	4.82e-06	0.198292	4.82e-06	4.82e-06	4.82e-06	4.82e-06	8.52066e-26	1.93928e-25
DDX6	0.695119	0.608816	1.13491	4.26036	0.66786	0.173518	5.83909e-54	1.88594e-53
DDX60	0.143042	0.00869822	4.82e-06	4.82e-06	4.82e-06	4.82e-06	5.07416e-38	1.37374e-37
DEGS1	4.82e-06	4.82e-06	4.82e-06	0.251349	4.82e-06	4.82e-06	3.13621e-104	2.04249e-103
DEK	4.82e-06	0.178677	4.82e-06	1.89433	4.82e-06	4.82e-06	4.40476e-83	2.03548e-82
DENND2D	4.82e-06	4.82e-06	4.82e-06	4.82e-06	4.82e-06	0.267823	1.92009e-97	1.10689e-96
DENR	4.82e-06	4.82e-06	4.82e-06	4.82e-06	4.82e-06	1.43107	1.00689e-89	5.11455e-89
DEPTOR	1.80451	0.17743	4.82e-06	0.634263	4.82e-06	4.82e-06	4.37338e-45	1.27912e-44
DERL1	0.509369	1.00674	0.628356	2.32965	4.82e-06	0.855612	2.22813e-82	1.02324e-81
DHRS11	4.82e-06	4.82e-06	4.82e-06	0.145567	4.82e-06	4.82e-06	1.93461e-45	5.67113e-45
DHX16	1.08318	3.07165	0.781641	1.55842	0.98311	4.82e-06	2.57495e-126	2.80318e-125
DHX38	4.82e-06	4.82e-06	4.82e-06	0.0755901	4.82e-06	0.233125	2.04942e-196	2.30381e-194
DHX57	4.82e-06	0.0425533	4.82e-06	4.82e-06	4.82e-06	4.82e-06	8.52066e-26	1.93928e-25
DIABLO	0.472068	0.0390073	0.788298	0.112397	2.29751	0.45833	1.68739e-95	9.54648e-95
DIAPH2	0.328631	0.174552	1.58333	0.179874	0.240036	4.82e-06	7.71493e-118	6.99893e-117
DICER1	0.0569156	0.147794	4.82e-06	0.461481	0.188371	4.82e-06	2.19249e-144	3.90943e-143
DIDO1	0.0610312	0.0189128	4.82e-06	0.0262792	0.172992	4.82e-06	2.36326e-147	4.49281e-146
DLG3	0.0501455	0.0211073	4.82e-06	0.415949	4.82e-06	4.82e-06	1.79475e-56	6.03424e-56
DLG4	4.82e-06	0.0723229	4.82e-06	0.249785	4.82e-06	4.82e-06	8.09392e-23	1.79784e-22
DLGAP4	4.82e-06	4.82e-06	4.82e-06	4.82e-06	0.561726	4.82e-06	1.5633e-216	4.49102e-214
DMD	0.284972	0.201934	0.220248	0.0805755	0.238922	1.77277	3.69128e-48	1.13414e-47
DMGDH	4.82e-06	0.292636	4.82e-06	4.82e-06	4.82e-06	0.116801	1.35817e-77	5.80422e-77
DMXL1	4.82e-06	4.82e-06	4.82e-06	0.0732968	4.82e-06	0.151498	1.15125e-83	5.37696e-83
DNAJA3	0.419243	0.531113	1.75965	0.557595	0.43481	0.555354	1.18658e-24	2.67355e-24
DNAJB4	4.82e-06	4.82e-06	4.82e-06	0.330407	4.82e-06	4.82e-06	3.13621e-104	2.04249e-103
DNAJC10	0.514111	0.370132	2.46331	0.603049	1.09592	0.210266	1.00896e-41	2.80954e-41
DNAJC11	1.27136	1.11651	4.69888	0.63484	1.61716	1.30867	1.30336e-18	2.73083e-18
DNAJC19	4.82e-06	0.216366	4.82e-06	4.82e-06	4.82e-06	4.82e-06	3.04642e-15	6.0172e-15
DNAJC9	0.280007	0.495141	1.73907	0.232759	4.82e-06	0.238618	1.24672e-88	6.27122e-88
DOCK4	4.82e-06	0.132742	4.82e-06	0.0257205	4.82e-06	4.82e-06	1.25674e-32	3.2235e-32
DOCK9	4.82e-06	4.82e-06	4.82e-06	0.13266	4.82e-06	4.82e-06	1.93461e-45	5.67113e-45
DPH2	4.82e-06	4.82e-06	4.82e-06	4.82e-06	4.82e-06	1.60325	1.16207e-215	2.7314e-213
DPM1	4.82e-06	4.82e-06	4.82e-06	0.444792	4.82e-06	4.82e-06	3.13621e-104	2.04249e-103
DPP8	4.82e-06	0.00594979	4.82e-06	4.82e-06	4.82e-06	4.82e-06	3.04642e-15	6.0172e-15
DPYS	4.82e-06	4.82e-06	4.82e-06	4.82e-06	4.82e-06	0.30349	1.92009e-97	1.10689e-96
DPYSL5	4.82e-06	0.0528276	4.82e-06	0.453278	4.82e-06	4.82e-06	3.61311e-65	1.32413e-64
DTD1	0.406921	2.88399	4.82e-06	0.665068	4.82e-06	4.82e-06	1.61912e-132	2.05711e-131
EBI3	4.82e-06	0.285617	4.82e-06	2.97378	4.82e-06	4.82e-06	1.70828e-74	6.96099e-74
ECHDC3	4.82e-06	4.82e-06	4.82e-06	4.82e-06	4.82e-06	0.375814	1.00689e-89	5.11455e-89
ECSCR	4.82e-06	0.272164	4.82e-06	4.82e-06	4.82e-06	4.82e-06	8.257e-17	1.69567e-16
ECSIT	4.82e-06	0.0486793	4.82e-06	4.82e-06	4.82e-06	0.19607	9.13614e-79	3.97e-78
EDC3	4.82e-06	4.82e-06	4.82e-06	0.341315	4.82e-06	4.82e-06	3.13621e-104	2.04249e-103
EDF1	0.161066	0.015505	4.82e-06	4.82e-06	4.82e-06	4.82e-06	4.56661e-51	1.43463e-50
EED	4.82e-06	4.82e-06	4.82e-06	0.0814857	4.82e-06	4.82e-06	1.26783e-54	4.11805e-54
EFEMP2	4.82e-06	0.183099	4.82e-06	4.82e-06	4.82e-06	4.82e-06	2.69309e-30	6.76345e-30
EFNA1	4.82e-06	0.0474891	4.82e-06	4.82e-06	4.82e-06	4.82e-06	8.52066e-26	1.93928e-25
EIF1	4.82e-06	4.82e-06	4.82e-06	4.84471	4.82e-06	4.82e-06	3.13621e-104	2.04249e-103
EIF1B	4.82e-06	4.82e-06	4.82e-06	4.84471	4.82e-06	4.82e-06	3.13621e-104	2.04249e-103
EIF2A	4.82e-06	0.0864439	4.82e-06	4.82e-06	4.82e-06	4.82e-06	3.44515e-28	8.45109e-28
EIF2B2	0.355995	0.101421	4.82e-06	0.067194	4.82e-06	4.82e-06	2.77043e-38	7.51225e-38
EIF2B3	4.82e-06	0.193547	4.82e-06	0.192587	0.180418	0.423292	5.52875e-116	4.76486e-115
EIF2B4	4.82e-06	0.895222	4.82e-06	2.47857	4.82e-06	4.82e-06	1.17142e-55	3.908e-55
EIF2D	4.82e-06	4.82e-06	4.82e-06	4.82e-06	0.489131	4.82e-06	1.5633e-216	4.49102e-214
EIF2S2	4.82e-06	4.82e-06	4.82e-06	0.0959429	4.82e-06	4.82e-06	3.13621e-104	2.04249e-103
EIF3H	4.82e-06	4.82e-06	4.82e-06	0.237736	4.82e-06	0.847822	2.7715e-77	1.17954e-76
EIF3K	4.82e-06	0.105255	4.82e-06	4.82e-06	4.82e-06	4.82e-06	1.84103e-09	3.37109e-09
EIF4E	4.82e-06	0.0805901	4.82e-06	0.248434	4.82e-06	0.71506	3.51196e-80	1.56285e-79
EIF4ENIF1	0.314877	0.404663	4.82e-06	4.82e-06	1.42761	4.82e-06	2.27524e-170	9.97057e-169
EIF4H	0.265236	0.262536	1.55121	0.103977	0.260395	0.178949	3.28e-09	5.99324e-09
EIPR1	4.82e-06	0.00621085	4.82e-06	4.82e-06	4.82e-06	4.82e-06	3.04642e-15	6.0172e-15
ELAC2	4.82e-06	0.67488	4.82e-06	4.82e-06	4.82e-06	4.82e-06	2.12327e-165	7.6246e-164
ELANE	0.889036	0.533552	4.82e-06	2.9725	4.82e-06	0.379814	2.43918e-60	8.56278e-60
ELAVL4	4.82e-06	4.82e-06	4.82e-06	0.148054	4.82e-06	4.82e-06	1.93461e-45	5.67113e-45
ELFN1	4.82e-06	0.188965	4.82e-06	2.00053	4.82e-06	4.82e-06	2.46969e-78	1.06246e-77
ELMO3	4.82e-06	0.0345271	4.82e-06	4.82e-06	4.82e-06	4.82e-06	6.83919e-30	1.69863e-29
ELOB	4.82e-06	0.283225	4.82e-06	0.100351	0.688948	4.82e-06	2.60763e-162	8.53422e-161
ELOVL7	4.82e-06	4.82e-06	33.4213	2.67803	4.82e-06	12.3048	1.88243e-138	2.8052e-137
ELP1	0.644697	4.82e-06	4.82e-06	4.82e-06	5.7108	4.82e-06	5.62363e-184	3.72818e-182
EMC8	4.82e-06	0.934971	4.82e-06	4.82e-06	4.82e-06	4.82e-06	7.23956e-43	2.06599e-42
EMG1	4.82e-06	0.0390903	4.82e-06	0.133172	4.82e-06	4.82e-06	7.90187e-39	2.15396e-38
EML3	4.82e-06	0.0255074	4.82e-06	4.82e-06	4.82e-06	4.82e-06	8.52066e-26	1.93928e-25
EP300	4.82e-06	0.00375261	4.82e-06	4.82e-06	4.82e-06	4.82e-06	1.84103e-09	3.37109e-09
EPHA1	4.82e-06	4.82e-06	4.82e-06	4.82e-06	4.82e-06	0.234348	1.00689e-89	5.11455e-89
EPHB3	0.130376	0.0198462	4.82e-06	4.82e-06	4.82e-06	4.82e-06	1.76325e-95	9.96475e-95
EPHB4	4.82e-06	0.0291935	4.82e-06	4.82e-06	4.82e-06	4.82e-06	8.52066e-26	1.93928e-25
ERBB2	4.82e-06	0.133384	4.82e-06	4.82e-06	4.82e-06	0.360366	8.07643e-75	3.30405e-74
ERBB4	4.82e-06	4.82e-06	4.82e-06	4.82e-06	4.82e-06	0.547922	1.00689e-89	5.11455e-89
ERBIN	4.82e-06	0.0266995	4.82e-06	4.82e-06	4.82e-06	4.82e-06	7.23956e-43	2.06599e-42
ERLIN1	4.82e-06	0.0322546	4.82e-06	4.82e-06	4.82e-06	4.82e-06	3.04642e-15	6.0172e-15
ERMN	0.278872	0.0618993	4.82e-06	4.82e-06	4.82e-06	4.82e-06	2.48508e-127	2.76947e-126
EXOC5	4.82e-06	0.189738	4.82e-06	4.82e-06	4.82e-06	4.82e-06	3.04642e-15	6.0172e-15
EXOC6B	0.250591	0.0781214	0.634902	0.303999	4.82e-06	4.82e-06	7.33302e-133	9.38591e-132
EXOSC10	4.82e-06	0.117796	4.82e-06	4.82e-06	4.82e-06	4.82e-06	8.52066e-26	1.93928e-25
EXOSC3	1.89023	0.540424	4.82e-06	4.10094	4.82e-06	8.94902	2.73957e-158	7.87017e-157
EXT1	0.468327	0.0503469	4.82e-06	4.82e-06	4.82e-06	4.82e-06	5.21517e-82	2.37391e-81
FABP6	4.82e-06	0.330276	4.82e-06	1.78894	4.82e-06	4.82e-06	1.07497e-68	4.10234e-68
FAM114A1	4.82e-06	0.0478686	4.82e-06	4.82e-06	4.82e-06	4.82e-06	3.04642e-15	6.0172e-15
FAM151A	0.680383	4.82e-06	4.82e-06	4.82e-06	4.82e-06	4.82e-06	2.41365e-47	7.2733e-47
FAM160A2	0.108831	0.0151482	4.82e-06	4.82e-06	4.82e-06	4.82e-06	7.86417e-70	3.03249e-69
FAM20A	0.0874681	0.0301037	4.82e-06	0.0357552	4.82e-06	0.0306068	1.81174e-78	7.82666e-78
FAM83F	4.82e-06	0.00808466	4.82e-06	4.82e-06	4.82e-06	4.82e-06	1.84103e-09	3.37109e-09
FAM91A1	1.08446	0.0336078	4.82e-06	0.390527	4.82e-06	0.121217	3.58905e-88	1.79487e-87
FANCI	4.82e-06	0.0088647	0.161407	4.82e-06	4.82e-06	4.82e-06	1.68213e-201	2.48523e-199
FASTKD2	4.82e-06	0.00899051	4.82e-06	4.82e-06	4.82e-06	4.82e-06	3.04642e-15	6.0172e-15
FBXL2	4.82e-06	0.084257	4.82e-06	4.82e-06	4.82e-06	4.82e-06	3.04642e-15	6.0172e-15
FBXO22	4.82e-06	4.82e-06	4.82e-06	4.82e-06	4.82e-06	0.358474	1.00689e-89	5.11455e-89
FBXW9	4.82e-06	0.132808	4.82e-06	4.82e-06	4.82e-06	4.82e-06	8.52066e-26	1.93928e-25
FCSK	0.0561463	0.0255924	4.82e-06	0.282518	4.82e-06	0.138905	4.64021e-73	1.86004e-72
FDPS	4.82e-06	0.151459	4.82e-06	4.82e-06	4.82e-06	4.82e-06	5.35817e-19	1.12722e-18
FERMT1	4.82e-06	0.0546925	4.82e-06	4.82e-06	4.82e-06	4.82e-06	5.35817e-19	1.12722e-18
FES	4.82e-06	4.82e-06	4.82e-06	0.0685129	4.82e-06	0.18308	1.15157e-83	5.37696e-83
FGFR1OP	4.82e-06	4.82e-06	4.82e-06	4.82e-06	4.82e-06	1.72119	1.00689e-89	5.11455e-89
FGFR2	4.82e-06	4.82e-06	4.82e-06	0.346874	4.82e-06	4.82e-06	1.93461e-45	5.67113e-45
FGGY	0.106099	0.128466	4.82e-06	4.82e-06	1.80969	4.82e-06	7.88882e-182	4.91483e-180
FHIT	4.82e-06	4.82e-06	4.82e-06	0.0250413	4.82e-06	4.82e-06	1.93461e-45	5.67113e-45
FHOD1	4.82e-06	4.82e-06	4.82e-06	0.318608	1.97348	4.82e-06	3.58625e-196	3.86344e-194
FIP1L1	4.82e-06	4.82e-06	4.82e-06	0.980068	4.82e-06	4.82e-06	3.13621e-104	2.04249e-103
FKBP10	0.251461	0.213649	0.489298	0.218432	0.1099	0.154025	2.22321e-27	5.40236e-27
FKBP15	4.82e-06	0.00985498	4.82e-06	0.105653	4.82e-06	4.82e-06	5.5768e-79	2.43561e-78
FKBP9	4.82e-06	4.82e-06	4.82e-06	4.82e-06	2.47373	0.851153	2.47631e-156	6.81116e-155
FLII	0.121016	0.3348	4.82e-06	0.0812162	0.123795	0.147112	1.04819e-58	3.58952e-58
FLT1	4.82e-06	4.82e-06	4.82e-06	0.0277285	4.82e-06	4.82e-06	3.13621e-104	2.04249e-103
FMNL1	0.217084	0.217647	0.329553	0.701415	0.170298	0.298497	5.41342e-05	9.53433e-05
FMNL2	4.82e-06	4.82e-06	4.82e-06	4.82e-06	4.82e-06	0.289098	1.00689e-89	5.11455e-89
FMNL3	4.82e-06	4.82e-06	4.82e-06	0.289926	4.82e-06	4.82e-06	1.93461e-45	5.67113e-45
FMOD	0.586315	0.251445	4.82e-06	1.28445	4.82e-06	0.17148	6.44674e-117	5.68875e-116
FN3K	0.381732	0.769709	4.82e-06	4.82e-06	2.0996	4.82e-06	7.22663e-160	2.14764e-158
FNBP1L	4.82e-06	4.82e-06	4.82e-06	1.50942	23.9408	4.82e-06	3.19647e-204	6.35728e-202
FNDC3B	4.82e-06	0.0645594	4.82e-06	4.82e-06	4.82e-06	0.214371	1.97885e-72	7.88947e-72
FNTB	4.82e-06	0.0923298	4.82e-06	4.82e-06	4.82e-06	4.82e-06	3.04642e-15	6.0172e-15
FOLH1	4.82e-06	4.82e-06	4.82e-06	0.0634787	4.82e-06	4.82e-06	1.26783e-54	4.11805e-54
FOLH1B	4.82e-06	4.82e-06	4.82e-06	0.0676593	4.82e-06	4.82e-06	1.26783e-54	4.11805e-54
FRY	4.82e-06	0.0423205	4.82e-06	4.82e-06	4.82e-06	4.82e-06	8.52066e-26	1.93928e-25
FRYL	4.82e-06	0.0211846	4.82e-06	4.82e-06	4.82e-06	4.82e-06	8.52066e-26	1.93928e-25
FSTL3	4.82e-06	0.0952154	4.82e-06	4.82e-06	4.82e-06	4.82e-06	5.35817e-19	1.12722e-18
FUNDC1	4.82e-06	0.0333781	4.82e-06	4.82e-06	4.82e-06	4.82e-06	8.52066e-26	1.93928e-25
FUOM	4.82e-06	0.12516	4.82e-06	4.82e-06	4.82e-06	4.82e-06	5.35817e-19	1.12722e-18
FXR2	4.82e-06	0.0285709	4.82e-06	4.82e-06	4.82e-06	0.707661	1.00566e-197	1.30007e-195
FYCO1	0.247275	0.0849006	1.06093	4.82e-06	4.82e-06	4.82e-06	1.02025e-151	2.29378e-150
GABBR1	4.82e-06	0.235171	4.82e-06	0.792476	4.82e-06	4.82e-06	1.04763e-131	1.30224e-130
GADD45GIP1	4.82e-06	0.28983	4.82e-06	4.82e-06	4.82e-06	4.82e-06	5.35817e-19	1.12722e-18
GALK2	4.82e-06	1.07491	4.82e-06	4.82e-06	4.82e-06	4.82e-06	2.12327e-165	7.6246e-164
GALNS	4.82e-06	0.053705	4.82e-06	4.82e-06	4.82e-06	4.82e-06	8.52066e-26	1.93928e-25
GALNT3	3.07436	0.0510795	4.82e-06	4.82e-06	4.82e-06	4.82e-06	7.90769e-42	2.20435e-41
GALNT5	4.82e-06	0.0313175	4.82e-06	4.82e-06	4.82e-06	4.82e-06	5.35817e-19	1.12722e-18
GATD1	0.229045	4.82e-06	4.82e-06	4.82e-06	4.82e-06	4.82e-06	3.86899e-42	1.08085e-41
GBA2	4.82e-06	4.82e-06	4.82e-06	4.82e-06	4.82e-06	22.9107	1.00689e-89	5.11455e-89
GBP2	0.148242	0.948318	0.18633	0.357434	0.103516	0.073542	2.57497e-28	6.32549e-28
GBP3	4.82e-06	0.0144319	4.82e-06	4.82e-06	4.82e-06	4.82e-06	1.84103e-09	3.37109e-09
GEMIN5	4.82e-06	0.0254312	4.82e-06	1.619	4.82e-06	0.02518	5.34052e-63	1.90981e-62
GFER	0.816302	0.169986	4.82e-06	4.82e-06	4.82e-06	3.80823	7.15586e-176	3.85448e-174
GFM1	0.155764	0.263383	0.283728	0.253566	0.166565	0.675612	1.12632e-37	3.03028e-37
GFM2	4.82e-06	0.0979768	4.82e-06	4.82e-06	4.82e-06	4.82e-06	6.83919e-30	1.69863e-29
GGA2	4.82e-06	4.82e-06	4.82e-06	0.0526794	4.82e-06	4.82e-06	1.26783e-54	4.11805e-54
GGACT	4.82e-06	4.82e-06	4.82e-06	0.151469	4.82e-06	4.82e-06	1.93461e-45	5.67113e-45
GGCX	4.82e-06	4.82e-06	4.82e-06	4.82e-06	4.82e-06	0.390419	1.00689e-89	5.11455e-89
GGTLC1	4.82e-06	0.0477658	4.82e-06	4.82e-06	4.82e-06	4.82e-06	2.6355e-18	5.49523e-18
GGTLC2	1.31068	3.69185	4.82e-06	4.82e-06	4.82e-06	4.82e-06	3.8622e-157	1.09134e-155
GGTLC3	4.82e-06	2.96456	4.82e-06	4.82e-06	4.82e-06	4.82e-06	3.08564e-175	1.59558e-173
GID8	1.17013	0.368362	4.82e-06	0.109794	4.82e-06	4.82e-06	1.13142e-115	9.71856e-115
GIMAP7	0.126472	0.0243802	4.82e-06	0.750681	4.82e-06	4.82e-06	1.32089e-34	3.45663e-34
GLA	4.82e-06	0.0620846	4.82e-06	4.82e-06	4.82e-06	4.82e-06	7.46366e-15	1.46469e-14
GLRX	4.82e-06	4.82e-06	4.82e-06	0.376229	4.82e-06	4.82e-06	3.13621e-104	2.04249e-103
GLT8D1	4.82e-06	0.397291	4.82e-06	1.18392	4.82e-06	4.82e-06	1.63981e-58	5.6007e-58
GLUL	0.176859	4.82e-06	4.82e-06	0.303537	4.82e-06	0.113337	9.47903e-81	4.24014e-80
GMEB2	4.82e-06	4.82e-06	4.82e-06	0.170202	4.82e-06	4.82e-06	3.13621e-104	2.04249e-103
GMIP	4.82e-06	0.0599696	4.82e-06	4.82e-06	4.82e-06	0.661876	1.0743e-184	7.40696e-183
GNA15	4.82e-06	0.148926	4.82e-06	0.741481	4.82e-06	4.82e-06	2.85251e-82	1.30881e-81
GNG12	4.82e-06	4.82e-06	4.82e-06	0.758083	4.82e-06	4.82e-06	3.13621e-104	2.04249e-103
GNL1	0.0733876	4.82e-06	4.82e-06	4.82e-06	4.82e-06	4.82e-06	3.86899e-42	1.08085e-41
GNPNAT1	4.82e-06	0.152608	4.82e-06	4.82e-06	1.64324	4.82e-06	1.34433e-196	1.54479e-194
GOLIM4	4.82e-06	0.0244673	4.82e-06	4.82e-06	4.82e-06	4.82e-06	5.35817e-19	1.12722e-18
GON7	0.273222	0.720952	4.82e-06	4.91583	4.82e-06	4.82e-06	3.24919e-59	1.1216e-58
GP2	0.217424	0.219491	0.347021	0.956408	0.226373	0.204166	1.27582e-08	2.32135e-08
GP9	0.547339	1.04182	4.82e-06	2.21703	2.73446	9.18482	2.56514e-158	7.41024e-157
GPC1	0.25742	0.0808346	0.434604	1.0207	0.203702	0.28427	1.30865e-56	4.40561e-56
GPC6	4.82e-06	0.0668503	4.82e-06	4.82e-06	4.82e-06	4.82e-06	6.83919e-30	1.69863e-29
GPD1	0.0332409	0.143916	4.82e-06	4.82e-06	4.82e-06	4.82e-06	1.14914e-53	3.6908e-53
GPM6B	4.82e-06	0.0275367	4.82e-06	4.82e-06	4.82e-06	0.163986	3.07975e-69	1.17791e-68
GPRC5A	4.82e-06	0.245321	4.82e-06	4.82e-06	4.82e-06	4.82e-06	1.84103e-09	3.37109e-09
GPRC5B	4.82e-06	0.00738465	4.82e-06	4.82e-06	4.82e-06	4.82e-06	3.04642e-15	6.0172e-15
GRAP2	0.273835	4.82e-06	4.82e-06	4.82e-06	4.82e-06	4.82e-06	2.41365e-47	7.2733e-47
GRIA2	4.82e-06	0.0919643	4.82e-06	4.82e-06	4.82e-06	4.82e-06	5.35817e-19	1.12722e-18
GRIA3	0.561035	0.439657	4.82e-06	0.306143	4.82e-06	4.82e-06	9.63196e-112	7.80672e-111
GRIPAP1	0.0267604	0.160056	0.351239	0.169205	4.82e-06	0.141033	8.73301e-120	8.19572e-119
GRN	0.155999	0.0368111	0.496551	4.82e-06	4.82e-06	4.82e-06	6.17797e-157	1.73621e-155
GSDMB	4.82e-06	0.246741	4.82e-06	4.82e-06	4.82e-06	4.82e-06	9.83567e-186	7.06392e-184
GSK3A	4.82e-06	4.82e-06	4.82e-06	4.82e-06	4.82e-06	0.25583	1.92009e-97	1.10689e-96
GSK3B	0.0350894	0.0191025	4.82e-06	0.0216262	4.82e-06	0.368146	1.06299e-172	4.99701e-171
GSKIP	4.82e-06	0.0694443	4.82e-06	4.82e-06	4.82e-06	4.82e-06	1.84103e-09	3.37109e-09
GSTK1	0.241537	0.0679474	4.82e-06	4.82e-06	4.82e-06	4.82e-06	4.63646e-39	1.26852e-38
GSTT1	0.860506	0.267901	4.82e-06	4.82e-06	0.348739	4.82e-06	3.0491e-191	2.67236e-189
GTF2E2	4.82e-06	0.027805	4.82e-06	4.82e-06	4.82e-06	4.82e-06	8.52066e-26	1.93928e-25
GTF2F1	4.82e-06	0.0331538	4.82e-06	0.120186	4.82e-06	4.82e-06	5.27774e-75	2.16769e-74
GTF3C1	4.82e-06	0.0196321	4.82e-06	4.82e-06	4.82e-06	4.82e-06	5.35817e-19	1.12722e-18
GTF3C2	4.82e-06	0.233068	4.82e-06	4.82e-06	4.82e-06	4.82e-06	8.52066e-26	1.93928e-25
GTF3C3	4.82e-06	4.82e-06	4.82e-06	0.171219	4.82e-06	4.82e-06	1.26783e-54	4.11805e-54
GTF3C5	4.82e-06	4.82e-06	4.82e-06	4.82e-06	4.82e-06	1.08864	1.92009e-97	1.10689e-96
GTPBP4	0.50462	0.351641	4.82e-06	0.118798	4.82e-06	0.278507	5.37222e-48	1.64767e-47
GUCY1A2	4.82e-06	4.82e-06	4.82e-06	4.82e-06	4.82e-06	0.184699	1.92009e-97	1.10689e-96
GYG1	4.82e-06	0.0590076	4.82e-06	4.82e-06	0.711541	4.82e-06	3.12514e-199	4.36759e-197
HAX1	4.82e-06	0.0632791	4.82e-06	4.82e-06	4.82e-06	4.82e-06	8.52066e-26	1.93928e-25
HCCS	4.82e-06	0.018639	4.82e-06	4.82e-06	4.82e-06	4.82e-06	3.04642e-15	6.0172e-15
HDAC7	4.82e-06	0.22705	4.82e-06	4.82e-06	1.2195	4.82e-06	8.47399e-191	7.30317e-189
HDDC2	4.82e-06	0.0238205	4.82e-06	0.0586476	4.82e-06	4.82e-06	3.24652e-82	1.48696e-81
HDHD5	0.398758	0.0551285	4.82e-06	0.579382	1.26582	4.82e-06	1.46633e-139	2.22358e-138
HEATR5A	4.82e-06	0.0188076	4.82e-06	4.82e-06	4.82e-06	4.82e-06	5.35817e-19	1.12722e-18
HECTD4	4.82e-06	0.0050637	4.82e-06	4.82e-06	4.82e-06	4.82e-06	3.04642e-15	6.0172e-15
HELLS	4.82e-06	0.00659308	4.82e-06	4.82e-06	4.82e-06	4.82e-06	3.04642e-15	6.0172e-15
HELZ2	0.1548	0.235698	4.82e-06	4.82e-06	4.82e-06	4.82e-06	2.94172e-148	5.85063e-147
HEPACAM	4.82e-06	4.82e-06	4.82e-06	0.267703	4.82e-06	4.82e-06	1.93461e-45	5.67113e-45
HES7	0.936615	0.238858	4.82e-06	2.24727	4.82e-06	4.82e-06	2.46525e-57	8.34827e-57
HEXIM1	0.268724	0.0478047	4.82e-06	0.112713	4.82e-06	0.491617	5.18969e-51	1.6274e-50
HGD	4.82e-06	4.82e-06	4.82e-06	0.0155174	4.82e-06	4.82e-06	1.93461e-45	5.67113e-45
HGS	0.0726177	0.0239656	4.82e-06	0.205918	4.82e-06	4.82e-06	4.29501e-70	1.66613e-69
HIP1R	4.82e-06	4.82e-06	4.82e-06	4.82e-06	4.82e-06	0.215457	1.00689e-89	5.11455e-89
HIRIP3	4.82e-06	0.0430083	4.82e-06	4.82e-06	4.82e-06	1.75349	1.00086e-88	5.0394e-88
HLA-DRB3	4.82e-06	0.00661692	4.82e-06	4.82e-06	4.82e-06	4.82e-06	8.52066e-26	1.93928e-25
HLA-DRB5	0.0633636	0.00887311	4.82e-06	4.82e-06	4.82e-06	4.82e-06	9.36547e-37	2.50149e-36
HM13	4.82e-06	0.0216068	4.82e-06	4.82e-06	4.82e-06	4.82e-06	8.52066e-26	1.93928e-25
HMCN1	4.82e-06	0.00468494	4.82e-06	4.82e-06	4.82e-06	4.82e-06	8.52066e-26	1.93928e-25
HMGA1	4.82e-06	0.112408	4.82e-06	4.82e-06	4.82e-06	4.82e-06	8.52066e-26	1.93928e-25
HMGN4	4.82e-06	4.82e-06	4.82e-06	4.82e-06	4.82e-06	9.07337	1.00689e-89	5.11455e-89
HMOX2	0.757749	0.247381	0.296802	1.83384	0.502222	0.641284	4.03496e-23	8.98569e-23
HNF1A	4.82e-06	0.122045	4.82e-06	4.82e-06	4.82e-06	3.29358	2.54998e-206	5.73302e-204
HNF1B	0.0565924	0.00821144	4.82e-06	4.82e-06	4.82e-06	4.82e-06	7.86417e-70	3.03249e-69
HPN	0.0397722	0.139886	4.82e-06	0.0382617	4.82e-06	0.0237035	3.43899e-86	1.67606e-85
HS1BP3	4.82e-06	0.0258722	4.82e-06	4.82e-06	4.82e-06	4.82e-06	5.35817e-19	1.12722e-18
HS2ST1	4.82e-06	0.123323	4.82e-06	4.82e-06	4.82e-06	4.82e-06	1.84103e-09	3.37109e-09
HSBP1	4.82e-06	0.215602	4.82e-06	4.82e-06	0.697325	4.82e-06	5.23223e-189	4.22747e-187
HSD17B12	4.82e-06	4.82e-06	4.82e-06	0.175593	0.820403	4.82e-06	6.10465e-197	7.17435e-195
HSDL1	4.82e-06	4.82e-06	4.82e-06	4.82e-06	4.82e-06	4.84708	1.92009e-97	1.10689e-96
HSPA12A	0.353104	0.158487	1.14453	0.290169	0.174509	0.193199	1.8608e-23	4.16005e-23
HSPA14	4.82e-06	0.0369287	4.82e-06	4.82e-06	4.82e-06	4.82e-06	7.23956e-43	2.06599e-42
HSPA4L	4.82e-06	0.0335868	4.82e-06	0.354107	4.82e-06	4.82e-06	1.55156e-77	6.6252e-77
HTRA2	4.82e-06	0.0494747	4.82e-06	4.82e-06	4.82e-06	4.82e-06	6.83919e-30	1.69863e-29
HTT	0.511759	0.0768538	4.82e-06	0.0652159	0.0673682	0.0387406	1.78343e-84	8.46065e-84
IBA57	0.0703153	4.82e-06	4.82e-06	4.82e-06	0.337751	4.82e-06	4.92404e-179	2.82913e-177
IDH3G	0.140131	0.0450391	4.82e-06	4.82e-06	4.82e-06	4.82e-06	3.23772e-100	1.99788e-99
IFI30	0.32986	1.11908	4.82e-06	0.169127	4.82e-06	0.308803	5.1405e-71	2.01375e-70
IGHV1-24	4.82e-06	4.82e-06	4.82e-06	4.82e-06	16.1506	4.82e-06	1.5633e-216	4.49102e-214
IGHV1-3	4.82e-06	4.82e-06	4.82e-06	0.204773	4.82e-06	4.82e-06	3.13621e-104	2.04249e-103
IGHV1-46	4.82e-06	4.82e-06	4.82e-06	0.285313	4.82e-06	4.82e-06	3.13621e-104	2.04249e-103
IGHV2-70D	4.82e-06	0.236467	4.82e-06	1.69068	4.82e-06	4.82e-06	9.69136e-74	3.90905e-73
IGHV3-64	4.82e-06	4.82e-06	4.82e-06	0.0477281	4.82e-06	4.82e-06	3.13621e-104	2.04249e-103
IGHV4-28	4.82e-06	0.385267	4.82e-06	1.29057	4.82e-06	4.82e-06	1.78679e-73	7.19028e-73
IGHV4-30-4	0.976156	0.394374	0.399421	0.406451	4.82e-06	0.239107	8.9363e-106	6.53601e-105
IGHV4-38-2	0.976156	0.394374	0.399421	0.406451	4.82e-06	0.239107	8.9363e-106	6.53601e-105
IGHV4-59	0.976156	0.394374	0.399421	0.406451	4.82e-06	0.239107	8.9363e-106	6.53601e-105
IGHV4-61	0.976156	0.394374	0.399421	0.406451	4.82e-06	0.239107	8.9363e-106	6.53601e-105
IGHV5-10-1	4.82e-06	0.226793	4.82e-06	1.31966	4.82e-06	4.82e-06	2.53182e-73	1.01725e-72
IGHV7-4-1	4.82e-06	0.0194474	4.82e-06	0.10192	4.82e-06	4.82e-06	2.87609e-72	1.14226e-71
IGKV1-16	4.82e-06	4.82e-06	4.82e-06	0.262188	4.82e-06	4.82e-06	3.13621e-104	2.04249e-103
IGKV1-17	0.382335	0.652715	4.82e-06	0.396146	4.82e-06	3.06257	1.47868e-160	4.49781e-159
IGKV1D-16	4.82e-06	0.0244619	4.82e-06	0.282284	4.82e-06	4.82e-06	4.11222e-79	1.80359e-78
IGKV3D-7	4.82e-06	0.0852268	4.82e-06	4.82e-06	4.82e-06	4.82e-06	5.35817e-19	1.12722e-18
IGKV6D-21	0.884376	0.200482	4.82e-06	0.394828	4.82e-06	0.310762	7.45012e-94	4.12469e-93
IGKV6D-41	0.884376	0.200482	4.82e-06	0.394828	4.82e-06	0.307325	5.10837e-94	2.83427e-93
IGLV2-11	0.425356	0.116189	0.341885	0.999382	4.82e-06	0.357494	2.71844e-69	1.04126e-68
IGLV2-14	4.82e-06	0.0726405	4.82e-06	4.82e-06	4.82e-06	4.82e-06	3.04642e-15	6.0172e-15
IGLV2-18	4.82e-06	4.82e-06	4.82e-06	0.433537	4.82e-06	4.82e-06	3.13621e-104	2.04249e-103
IK	4.82e-06	0.623307	1.22058	4.82e-06	4.82e-06	4.82e-06	1.30066e-170	5.74848e-169
IKZF1	4.82e-06	0.0233476	4.82e-06	4.82e-06	4.82e-06	4.82e-06	8.52066e-26	1.93928e-25
INO80E	4.82e-06	0.217185	4.82e-06	4.82e-06	4.82e-06	4.82e-06	8.52066e-26	1.93928e-25
INPP1	4.82e-06	0.00811986	4.82e-06	4.82e-06	0.17527	4.82e-06	2.36447e-204	5.09445e-202
INPPL1	0.222464	0.05239	4.82e-06	0.0671196	4.82e-06	4.82e-06	5.06763e-104	3.27969e-103
INTS7	4.82e-06	4.82e-06	1.40877	0.0253796	4.82e-06	4.82e-06	1.91637e-197	2.41696e-195
INTS9	4.82e-06	4.82e-06	4.82e-06	0.110275	4.82e-06	0.68628	2.2735e-85	1.09667e-84
IPO11	4.82e-06	0.0486143	4.82e-06	4.82e-06	4.82e-06	0.101731	1.64457e-66	6.13571e-66
ISG20L2	4.82e-06	0.02368	4.82e-06	4.82e-06	4.82e-06	4.82e-06	3.04642e-15	6.0172e-15
ISOC2	4.82e-06	0.0339311	4.82e-06	0.407805	4.82e-06	4.82e-06	1.14843e-63	4.12685e-63
ITCH	0.114469	0.0332463	4.82e-06	0.340429	0.103864	4.82e-06	3.97258e-147	7.46989e-146
ITGA2	0.435742	0.276088	0.352277	1.78774	0.488502	0.437966	2.27666e-13	4.40591e-13
ITM2B	4.82e-06	0.0349298	4.82e-06	4.82e-06	4.82e-06	4.82e-06	8.52066e-26	1.93928e-25
ITPR2	0.0606039	0.076574	0.356052	4.82e-06	4.82e-06	0.13433	1.92673e-108	1.48261e-107
ITPRID2	0.167994	4.82e-06	4.82e-06	4.82e-06	4.82e-06	4.82e-06	3.86899e-42	1.08085e-41
IYD	4.82e-06	4.82e-06	4.82e-06	0.906547	4.82e-06	4.82e-06	3.13621e-104	2.04249e-103
JAK1	4.82e-06	0.0563278	4.82e-06	4.82e-06	4.82e-06	4.82e-06	5.35817e-19	1.12722e-18
JAM2	0.833947	1.23082	4.82e-06	4.82e-06	3.95828	4.82e-06	2.29003e-156	6.33248e-155
KANK1	4.82e-06	0.0251171	4.82e-06	4.82e-06	4.82e-06	4.82e-06	5.35817e-19	1.12722e-18
KAT7	4.82e-06	0.0292084	4.82e-06	4.82e-06	4.82e-06	4.82e-06	8.52066e-26	1.93928e-25
KBTBD11	4.82e-06	0.0253068	4.82e-06	4.82e-06	4.82e-06	4.82e-06	5.35817e-19	1.12722e-18
KCNAB2	0.236357	0.0775715	4.82e-06	4.82e-06	4.82e-06	4.82e-06	5.35654e-59	1.84044e-58
KCNN4	4.82e-06	0.0839219	4.82e-06	4.82e-06	4.82e-06	0.61413	3.78954e-197	4.66564e-195
KDELR1	4.82e-06	4.82e-06	4.82e-06	4.82e-06	4.82e-06	0.286129	1.00689e-89	5.11455e-89
KDM3B	0.0452996	4.82e-06	4.82e-06	4.82e-06	4.82e-06	4.82e-06	3.86899e-42	1.08085e-41
KHDRBS2	0.779247	0.317228	4.82e-06	4.82e-06	4.82e-06	0.372433	9.72037e-92	5.26325e-91
KHNYN	4.82e-06	0.0454926	4.82e-06	4.82e-06	4.82e-06	4.82e-06	3.04642e-15	6.0172e-15
KIAA1217	0.272299	0.354191	0.255582	0.0752674	0.17822	0.834142	3.61782e-46	1.07826e-45
KIF13A	0.772706	0.301466	4.82e-06	0.157332	4.82e-06	4.82e-06	3.53806e-133	4.58529e-132
KIF1A	0.137292	0.981202	4.82e-06	0.215014	4.82e-06	0.34463	1.65329e-142	2.7578e-141
KIF21A	4.82e-06	0.00796974	4.82e-06	4.82e-06	4.82e-06	4.82e-06	8.52066e-26	1.93928e-25
KIF5A	4.82e-06	0.0725295	4.82e-06	4.82e-06	0.720573	4.82e-06	2.34316e-196	2.57797e-194
KLC2	4.82e-06	0.0488855	4.82e-06	4.82e-06	4.82e-06	0.133619	1.21232e-74	4.94782e-74
KLHDC4	4.82e-06	0.0382275	4.82e-06	4.82e-06	4.82e-06	4.82e-06	8.52066e-26	1.93928e-25
KLK11	3.61329	1.655	5.50406	3.20434	12.287	2.85187	1.92774e-78	8.32083e-78
KPNA1	4.82e-06	4.82e-06	4.82e-06	0.0945553	4.82e-06	0.219101	2.4032e-77	1.02448e-76
KRAS	4.82e-06	0.0167656	0.968015	4.82e-06	4.82e-06	4.82e-06	3.64595e-204	6.98267e-202
KRT82	4.82e-06	4.82e-06	1.76499	4.82e-06	4.82e-06	4.82e-06	9.15363e-220	9.46669e-217
LAIR1	0.164281	0.247912	4.82e-06	4.82e-06	4.82e-06	4.82e-06	1.89338e-58	6.45822e-58
LALBA	4.82e-06	4.82e-06	4.82e-06	4.82e-06	4.82e-06	2.81511	1.92009e-97	1.10689e-96
LAMA1	4.82e-06	0.012058	4.82e-06	4.82e-06	4.82e-06	0.954833	5.4697e-202	9.12382e-200
LAMC3	0.0551992	0.0433379	4.82e-06	0.306224	4.82e-06	0.0453417	5.68922e-77	2.41139e-76
LAMTOR1	1.33747	0.502686	0.675424	2.38671	4.82e-06	4.82e-06	6.0979e-156	1.62537e-154
LAMTOR3	0.341982	0.267381	1.3507	0.578812	4.82e-06	4.82e-06	6.64852e-142	1.09141e-140
LARP4B	0.0874046	0.229469	4.82e-06	4.82e-06	4.82e-06	4.82e-06	7.86417e-70	3.03249e-69
LARP7	0.0411165	4.82e-06	0.37562	0.150593	4.82e-06	4.82e-06	3.75999e-148	7.42096e-147
LCLAT1	2.25362	2.82494	5.37769	4.82e-06	4.82e-06	4.82e-06	6.0454e-164	2.04319e-162
LCMT1	4.82e-06	0.0310713	4.82e-06	4.82e-06	4.82e-06	4.82e-06	3.04642e-15	6.0172e-15
LDLR	0.881091	0.0634746	0.218622	4.82e-06	0.120609	0.210862	3.75452e-67	1.40279e-66
LGI4	4.82e-06	0.0544913	4.82e-06	4.82e-06	4.82e-06	4.82e-06	3.04642e-15	6.0172e-15
LIG3	4.82e-06	0.0174396	4.82e-06	4.82e-06	4.82e-06	0.0694666	2.85442e-78	1.22695e-77
LILRA3	4.82e-06	0.0337905	0.854783	0.191665	4.82e-06	4.82e-06	5.76295e-162	1.82824e-160
LILRA4	4.82e-06	0.0186535	4.82e-06	4.82e-06	4.82e-06	4.82e-06	8.52066e-26	1.93928e-25
LILRA6	4.82e-06	0.0198146	4.82e-06	4.82e-06	4.82e-06	4.82e-06	8.52066e-26	1.93928e-25
LILRB2	4.82e-06	0.0257864	4.82e-06	4.82e-06	4.82e-06	4.82e-06	8.52066e-26	1.93928e-25
LILRB3	4.82e-06	0.0470251	4.82e-06	4.82e-06	4.82e-06	0.0762521	7.2988e-60	2.54842e-59
LILRB5	0.13838	0.0732201	4.82e-06	4.82e-06	4.82e-06	4.82e-06	3.01807e-119	2.80691e-118
LIMS1	0.636417	0.169269	1.75527	0.103314	0.764418	4.82e-06	5.2175e-143	8.8458e-142
LIPA	4.82e-06	4.82e-06	4.82e-06	4.82e-06	4.82e-06	0.338561	1.92009e-97	1.10689e-96
LIPF	0.221199	0.440744	4.82e-06	4.82e-06	4.82e-06	4.82e-06	5.21517e-82	2.37391e-81
LMAN2L	0.939516	4.82e-06	4.82e-06	4.82e-06	4.82e-06	4.82e-06	2.41365e-47	7.2733e-47
LMCD1	0.157308	0.298014	0.566231	0.111211	4.82e-06	0.207134	1.50804e-70	5.88089e-70
LMF2	0.48465	0.0391156	4.82e-06	0.192877	0.115293	4.82e-06	4.81612e-144	8.49972e-143
LOX	4.82e-06	0.0432219	4.82e-06	4.82e-06	4.82e-06	4.82e-06	5.35817e-19	1.12722e-18
LOXL1	4.82e-06	0.130537	4.82e-06	4.82e-06	0.468554	4.82e-06	4.628e-201	6.6476e-199
LPCAT1	0.091212	0.0253944	0.294189	0.0579814	4.82e-06	4.82e-06	1.60509e-125	1.70429e-124
LPCAT4	4.82e-06	1.12285	4.82e-06	4.82e-06	4.82e-06	4.82e-06	6.73114e-17	1.38562e-16
LPGAT1	4.82e-06	0.0398143	4.82e-06	4.82e-06	4.82e-06	4.82e-06	5.35817e-19	1.12722e-18
LPXN	4.82e-06	0.052793	4.82e-06	4.82e-06	4.82e-06	4.82e-06	7.23956e-43	2.06599e-42
LRCH4	4.82e-06	4.82e-06	4.82e-06	0.479978	4.82e-06	4.82e-06	3.13621e-104	2.04249e-103
LRP1B	4.82e-06	0.0441839	4.82e-06	4.82e-06	4.82e-06	4.82e-06	8.52066e-26	1.93928e-25
LRP6	4.82e-06	0.0208194	4.82e-06	0.0612039	4.82e-06	4.82e-06	1.70067e-61	6.02754e-61
LRRC15	4.82e-06	4.82e-06	4.82e-06	4.82e-06	4.82e-06	0.227348	1.92009e-97	1.10689e-96
LRRC40	0.045888	0.027867	4.82e-06	0.0625081	4.82e-06	0.145878	6.11593e-57	2.06703e-56
LRRC8A	4.82e-06	0.139291	4.82e-06	0.0829578	4.82e-06	4.82e-06	7.37272e-141	1.17306e-139
LRSAM1	4.82e-06	0.0566142	4.82e-06	0.255999	4.82e-06	4.82e-06	7.34514e-23	1.63222e-22
LSG1	4.82e-06	0.120902	4.82e-06	0.390109	4.82e-06	4.82e-06	1.06153e-77	4.54778e-77
LSM1	4.82e-06	0.197312	4.82e-06	4.82e-06	4.82e-06	4.82e-06	8.52066e-26	1.93928e-25
LSM3	4.82e-06	0.0229177	4.82e-06	4.82e-06	4.82e-06	4.82e-06	5.35817e-19	1.12722e-18
LSM7	4.82e-06	0.0213551	4.82e-06	0.255456	4.82e-06	4.82e-06	1.65195e-83	7.66806e-83
LSM8	3.12857	0.646544	4.82e-06	0.661392	4.82e-06	0.839586	2.71118e-76	1.12878e-75
LSR	4.82e-06	0.0111954	4.82e-06	0.15596	4.82e-06	4.82e-06	5.45324e-38	1.47252e-37
LTBP2	0.151119	0.14955	0.113166	0.545683	0.214874	0.202379	1.34749e-25	3.06145e-25
LTBP4	0.125107	0.0217334	0.319559	0.0379738	4.82e-06	0.108901	2.34182e-89	1.18489e-88
LTN1	0.0503315	0.0438346	4.82e-06	0.0917984	0.196488	4.82e-06	4.05428e-137	5.88895e-136
LUC7L3	0.0555239	0.0356835	4.82e-06	4.82e-06	4.82e-06	4.82e-06	4.2478e-55	1.40804e-54
LY75	4.82e-06	0.0319952	4.82e-06	4.82e-06	4.82e-06	4.82e-06	8.52066e-26	1.93928e-25
LYAR	4.82e-06	0.165364	1.14477	4.82e-06	4.82e-06	4.82e-06	1.08676e-183	7.11344e-182
LYPLA2	9.65321	5.81683	3.57433	1.36128	8.66081	46.5299	9.49219e-44	2.75444e-43
LYPLAL1	0.318629	0.0555816	4.82e-06	4.82e-06	4.82e-06	0.954166	3.40379e-74	1.38264e-73
LYRM4	4.82e-06	1.3241	4.82e-06	4.96151	4.82e-06	4.82e-06	1.32128e-68	5.03489e-68
MACO1	4.82e-06	0.68793	4.82e-06	4.82e-06	4.82e-06	0.256732	8.43238e-152	1.9041e-150
MADD	4.82e-06	4.82e-06	4.82e-06	0.0948644	4.82e-06	4.82e-06	1.26783e-54	4.11805e-54
MALT1	4.82e-06	4.82e-06	4.82e-06	4.82e-06	0.350011	4.82e-06	1.5633e-216	4.49102e-214
MAMDC2	4.82e-06	0.0176635	4.82e-06	4.82e-06	4.82e-06	4.82e-06	8.52066e-26	1.93928e-25
MAN1A2	4.82e-06	0.0916893	4.82e-06	4.82e-06	4.82e-06	4.82e-06	3.04642e-15	6.0172e-15
MANSC1	4.82e-06	0.176654	4.82e-06	4.82e-06	4.82e-06	4.82e-06	5.35817e-19	1.12722e-18
MAP2K4	0.187045	4.82e-06	4.82e-06	0.428804	4.82e-06	4.82e-06	4.04345e-55	1.34202e-54
MAP2K6	0.193835	0.0429775	4.82e-06	4.82e-06	4.82e-06	4.82e-06	6.91423e-51	2.16294e-50
MAP2K7	4.82e-06	4.82e-06	4.82e-06	2.09123	4.82e-06	4.82e-06	3.13621e-104	2.04249e-103
MAP3K10	4.82e-06	4.82e-06	4.82e-06	4.82e-06	4.82e-06	0.82041	1.00689e-89	5.11455e-89
MAP3K11	4.82e-06	4.82e-06	4.82e-06	4.82e-06	4.82e-06	0.776823	1.00689e-89	5.11455e-89
MAP3K21	4.82e-06	4.82e-06	4.82e-06	4.82e-06	4.82e-06	0.87082	1.00689e-89	5.11455e-89
MAP3K9	4.82e-06	4.82e-06	4.82e-06	4.82e-06	4.82e-06	0.814212	1.00689e-89	5.11455e-89
MAP7	4.82e-06	4.82e-06	4.82e-06	0.155045	4.82e-06	4.82e-06	1.93461e-45	5.67113e-45
MAPK10	4.82e-06	0.0123173	4.82e-06	0.125674	4.82e-06	4.82e-06	2.63124e-34	6.85449e-34
MAPK11	4.82e-06	0.0171968	4.82e-06	0.13043	4.82e-06	4.82e-06	2.53682e-34	6.61518e-34
MAPK12	4.82e-06	0.0241072	4.82e-06	0.128408	4.82e-06	4.82e-06	2.49998e-34	6.52241e-34
MAPK13	0.453203	0.0207893	4.82e-06	0.1195	4.82e-06	4.82e-06	1.39835e-55	4.66206e-55
MAPK8	4.82e-06	0.0390729	4.82e-06	0.0971106	4.82e-06	4.82e-06	2.55544e-34	6.66037e-34
MAPT	4.82e-06	0.0436512	4.82e-06	0.167663	4.82e-06	4.82e-06	3.71474e-77	1.57838e-76
MARK3	4.82e-06	4.82e-06	4.82e-06	0.0785073	4.82e-06	4.82e-06	3.13621e-104	2.04249e-103
MAT1A	4.82e-06	0.0213522	4.82e-06	4.82e-06	4.82e-06	4.82e-06	5.35817e-19	1.12722e-18
MAVS	0.303417	4.82e-06	4.82e-06	4.82e-06	4.82e-06	4.82e-06	2.41365e-47	7.2733e-47
MBLAC2	4.82e-06	0.359199	4.82e-06	0.0866226	4.82e-06	4.82e-06	1.59196e-59	5.51744e-59
MBOAT7	4.82e-06	0.0233008	4.82e-06	0.148186	4.82e-06	4.82e-06	2.01542e-28	4.95331e-28
MCCC1	4.82e-06	0.0621815	4.82e-06	4.82e-06	4.82e-06	0.146688	4.61965e-56	1.54817e-55
MECR	4.82e-06	0.0220267	4.82e-06	4.82e-06	4.82e-06	4.82e-06	8.52066e-26	1.93928e-25
MEMO1	0.883766	0.071221	4.82e-06	4.82e-06	4.82e-06	4.82e-06	3.02611e-93	1.65588e-92
MEP1A	4.82e-06	0.545912	4.82e-06	4.82e-06	4.82e-06	4.82e-06	5.35817e-19	1.12722e-18
METTL17	4.82e-06	0.167063	4.82e-06	4.82e-06	0.505511	4.82e-06	2.71074e-186	2.00246e-184
METTL3	4.82e-06	0.0121203	4.82e-06	4.82e-06	4.82e-06	4.82e-06	3.04642e-15	6.0172e-15
MFAP4	2.42904	5.52043	1.55003	4.82e-06	1.13858	0.250871	1.11151e-79	4.90832e-79
MFN2	4.82e-06	4.82e-06	4.82e-06	4.82e-06	4.82e-06	0.494559	1.16207e-215	2.7314e-213
MGAM2	4.82e-06	0.190671	4.82e-06	4.82e-06	4.82e-06	4.82e-06	2.57056e-18	5.36198e-18
MGST1	4.82e-06	0.134787	4.82e-06	4.82e-06	4.82e-06	4.82e-06	5.35817e-19	1.12722e-18
MGST3	4.82e-06	4.82e-06	4.82e-06	0.150943	4.82e-06	4.82e-06	1.26783e-54	4.11805e-54
MICOS13	4.82e-06	4.82e-06	4.82e-06	0.537091	4.82e-06	4.82e-06	1.26783e-54	4.11805e-54
MIDEAS	4.82e-06	0.0180347	4.82e-06	4.82e-06	4.82e-06	0.232189	8.68485e-85	4.15059e-84
MIPEP	4.82e-06	0.0203807	4.82e-06	4.82e-06	4.82e-06	0.153783	1.39226e-73	5.61138e-73
MLLT11	4.82e-06	4.82e-06	4.82e-06	4.82e-06	4.82e-06	0.776319	1.92009e-97	1.10689e-96
MMAB	0.371346	0.0294854	4.82e-06	4.82e-06	4.82e-06	4.82e-06	8.5708e-37	2.29042e-36
MMP1	4.82e-06	4.82e-06	4.82e-06	0.176177	4.82e-06	4.82e-06	3.13621e-104	2.04249e-103
MOB1A	4.82e-06	0.0277665	4.82e-06	4.82e-06	4.82e-06	4.82e-06	3.04642e-15	6.0172e-15
MOB1B	4.82e-06	0.0277665	4.82e-06	4.82e-06	4.82e-06	4.82e-06	3.04642e-15	6.0172e-15
MOCS3	4.82e-06	0.00955062	4.82e-06	4.82e-06	4.82e-06	4.82e-06	3.04642e-15	6.0172e-15
MON2	4.82e-06	0.0128665	4.82e-06	4.82e-06	4.82e-06	4.82e-06	3.04642e-15	6.0172e-15
MORC1	0.0446971	0.0816352	4.82e-06	0.0701932	4.82e-06	0.279543	6.12236e-45	1.78964e-44
MORF4L1	4.82e-06	4.82e-06	4.82e-06	0.201122	4.82e-06	4.82e-06	3.13621e-104	2.04249e-103
MPHOSPH8	4.82e-06	0.0112203	4.82e-06	4.82e-06	4.82e-06	4.82e-06	1.84103e-09	3.37109e-09
MPP6	0.394192	0.167312	4.82e-06	0.127569	4.82e-06	4.82e-06	8.94283e-164	3.00282e-162
MRPL13	0.131765	0.10826	4.82e-06	4.82e-06	4.82e-06	4.82e-06	1.43328e-61	5.08334e-61
MRPL2	4.82e-06	0.00695605	4.82e-06	4.82e-06	4.82e-06	4.82e-06	3.04642e-15	6.0172e-15
MRPL21	4.82e-06	0.0978706	4.82e-06	0.235577	4.82e-06	4.82e-06	5.71342e-30	1.42725e-29
MRPL39	4.82e-06	4.82e-06	4.82e-06	0.336885	4.82e-06	4.82e-06	3.13621e-104	2.04249e-103
MRPL4	4.82e-06	0.137021	4.82e-06	4.82e-06	4.82e-06	4.82e-06	2.87767e-18	5.99052e-18
MRPL47	4.82e-06	0.0133345	4.82e-06	4.82e-06	4.82e-06	4.82e-06	3.04642e-15	6.0172e-15
MRPL49	4.82e-06	0.0323208	4.82e-06	4.82e-06	4.82e-06	4.82e-06	8.52066e-26	1.93928e-25
MRPL55	4.82e-06	0.0480582	4.82e-06	4.82e-06	4.82e-06	4.82e-06	3.04642e-15	6.0172e-15
MRPL9	4.82e-06	4.82e-06	4.82e-06	0.10119	4.82e-06	4.82e-06	1.26783e-54	4.11805e-54
MRPS10	4.82e-06	0.194572	4.82e-06	4.82e-06	4.82e-06	4.82e-06	7.23956e-43	2.06599e-42
MRPS28	0.283699	0.0610738	4.82e-06	4.82e-06	4.82e-06	4.82e-06	1.14914e-53	3.6908e-53
MRPS35	4.82e-06	0.0219991	4.82e-06	4.82e-06	4.82e-06	4.82e-06	8.52066e-26	1.93928e-25
MRPS7	0.0609071	4.82e-06	4.82e-06	4.82e-06	4.82e-06	4.82e-06	3.86899e-42	1.08085e-41
MRTO4	4.82e-06	4.82e-06	4.82e-06	0.494932	4.82e-06	1.85408	4.73508e-77	2.00862e-76
MSRA	4.82e-06	0.0199763	4.82e-06	4.82e-06	4.82e-06	4.82e-06	8.52066e-26	1.93928e-25
MTARC1	0.174944	4.82e-06	4.82e-06	4.82e-06	4.82e-06	4.82e-06	2.19076e-64	7.94977e-64
MTCH1	4.82e-06	0.0182764	4.82e-06	4.82e-06	4.82e-06	4.82e-06	1.84103e-09	3.37109e-09
MTCH2	4.82e-06	0.201823	4.82e-06	4.82e-06	4.82e-06	4.82e-06	1.84103e-09	3.37109e-09
MTCL1	4.82e-06	0.0503916	4.82e-06	4.82e-06	4.82e-06	4.82e-06	8.52066e-26	1.93928e-25
MTHFS	0.208449	0.0572262	4.82e-06	4.82e-06	4.82e-06	1.20054	7.83647e-65	2.8658e-64
MTIF2	4.82e-06	4.82e-06	4.82e-06	0.255896	4.82e-06	4.82e-06	3.13621e-104	2.04249e-103
MTPAP	4.82e-06	4.82e-06	4.82e-06	4.82e-06	4.82e-06	0.223902	1.92009e-97	1.10689e-96
MTR	4.82e-06	0.0283044	4.82e-06	0.0563175	4.82e-06	4.82e-06	3.90318e-29	9.63405e-29
MUC16	4.82e-06	4.82e-06	4.82e-06	0.0467291	4.82e-06	4.82e-06	1.26783e-54	4.11805e-54
MUC4	4.82e-06	4.82e-06	4.82e-06	0.262871	4.82e-06	4.82e-06	3.13621e-104	2.04249e-103
MVB12A	4.82e-06	0.155194	4.82e-06	4.82e-06	4.82e-06	4.82e-06	5.35817e-19	1.12722e-18
MX2	4.82e-06	4.82e-06	4.82e-06	0.165478	4.82e-06	4.82e-06	3.50697e-166	1.32369e-164
MXRA8	4.82e-06	4.82e-06	4.82e-06	0.166392	4.82e-06	4.82e-06	3.13621e-104	2.04249e-103
MYBBP1A	0.175416	0.168357	0.814407	0.18923	0.132562	0.213928	1.26038e-06	2.24817e-06
MYL1	1.60738	1.30794	1.29085	1.14319	1.88216	6.63957	4.3011e-32	1.09561e-31
MYL2	4.82e-06	4.82e-06	4.82e-06	4.82e-06	4.82e-06	2.98247	1.92009e-97	1.10689e-96
MYL3	1.39699	1.21756	1.10821	1.0508	1.46804	5.54775	5.22958e-30	1.30701e-29
MYO5B	0.0401188	0.0184843	0.215336	0.728132	4.82e-06	0.118982	4.9471e-91	2.64654e-90
MZT2B	0.606322	0.554836	0.291895	0.248886	0.388199	4.82e-06	1.2097e-108	9.37838e-108
NAA10	4.82e-06	0.0148208	4.82e-06	0.125859	4.82e-06	1.88947	6.81123e-83	3.14472e-82
NAA11	4.82e-06	4.82e-06	4.82e-06	0.0838537	4.82e-06	4.82e-06	3.13621e-104	2.04249e-103
NACA	4.82e-06	4.82e-06	4.82e-06	0.182692	4.82e-06	4.82e-06	1.26783e-54	4.11805e-54
NADK	4.82e-06	0.0343207	4.82e-06	4.82e-06	4.82e-06	4.82e-06	8.52066e-26	1.93928e-25
NADK2	0.140159	0.0221417	4.82e-06	0.453348	4.82e-06	4.82e-06	1.031e-64	3.76772e-64
NAPSA	4.82e-06	4.82e-06	4.82e-06	4.82e-06	4.82e-06	3.14629	1.92009e-97	1.10689e-96
NAT1	4.82e-06	0.142467	4.82e-06	4.82e-06	4.82e-06	4.82e-06	3.04642e-15	6.0172e-15
NBN	4.82e-06	0.229311	4.82e-06	1.39136	4.82e-06	0.438468	2.47663e-75	1.02045e-74
NCAPD2	4.82e-06	0.0170436	4.82e-06	4.82e-06	4.82e-06	4.82e-06	1.84103e-09	3.37109e-09
NCBP2	0.55797	0.0573045	4.82e-06	4.82e-06	4.82e-06	4.82e-06	6.77738e-38	1.82816e-37
NCSTN	4.82e-06	0.424944	4.82e-06	4.82e-06	4.82e-06	4.82e-06	5.35817e-19	1.12722e-18
ND1	4.82e-06	0.133654	4.82e-06	4.82e-06	4.82e-06	4.82e-06	8.52066e-26	1.93928e-25
NDC80	4.82e-06	0.0260041	4.82e-06	4.82e-06	4.82e-06	4.82e-06	8.52066e-26	1.93928e-25
NDE1	4.82e-06	0.141651	4.82e-06	4.82e-06	4.82e-06	4.82e-06	1.84103e-09	3.37109e-09
NDRG2	0.106991	4.82e-06	4.82e-06	3.33713	4.82e-06	4.82e-06	9.36367e-70	3.60533e-69
NDUFA2	4.82e-06	4.82e-06	4.82e-06	4.16537	4.82e-06	4.82e-06	3.13621e-104	2.04249e-103
NDUFA7	4.82e-06	0.511368	4.82e-06	4.82e-06	4.82e-06	4.82e-06	8.52066e-26	1.93928e-25
NDUFB11	4.82e-06	4.82e-06	4.82e-06	0.303493	4.82e-06	4.82e-06	3.13621e-104	2.04249e-103
NDUFB9	4.82e-06	4.82e-06	4.82e-06	3.50021	4.82e-06	4.82e-06	3.13621e-104	2.04249e-103
NDUFS4	4.82e-06	0.228611	4.82e-06	4.82e-06	0.967955	4.82e-06	5.14776e-193	4.83983e-191
NDUFS7	4.82e-06	0.0763485	4.82e-06	4.82e-06	4.82e-06	4.82e-06	3.04642e-15	6.0172e-15
NDUFS8	0.440106	0.435294	1.35394	0.443131	4.82e-06	0.381466	4.70528e-96	2.68851e-95
NDUFV2	4.82e-06	0.0156661	0.681859	4.82e-06	4.82e-06	4.82e-06	3.00166e-204	6.20863e-202
NECAP1	4.82e-06	0.00854764	4.82e-06	4.82e-06	4.82e-06	4.82e-06	3.04642e-15	6.0172e-15
NECAP2	4.82e-06	4.82e-06	4.82e-06	4.82e-06	4.82e-06	0.330152	1.00689e-89	5.11455e-89
NECTIN2	4.82e-06	0.0308651	4.82e-06	4.82e-06	4.82e-06	0.109884	2.74316e-58	9.34445e-58
NEDD1	0.755182	0.495727	0.522306	2.01028	0.358277	0.102925	8.13545e-72	3.2187e-71
NEDD8	4.82e-06	4.82e-06	4.82e-06	0.324107	4.82e-06	4.82e-06	1.93461e-45	5.67113e-45
NELFCD	4.82e-06	0.0692916	4.82e-06	4.82e-06	4.82e-06	4.82e-06	1.84103e-09	3.37109e-09
NELL2	0.26375	0.266199	3.5551	0.921315	0.711951	0.377915	2.53491e-42	7.20618e-42
NF1	0.0602177	0.00574821	0.136379	0.044301	4.82e-06	4.82e-06	2.89847e-125	3.04016e-124
NFASC	0.598294	0.480261	4.87955	0.749113	0.682199	1.20663	2.319e-20	5.0512e-20
NFATC2IP	4.82e-06	0.150093	4.82e-06	0.279515	4.82e-06	0.564806	5.64987e-172	2.58544e-170
NFIC	0.16713	4.82e-06	4.82e-06	4.82e-06	4.82e-06	4.82e-06	3.86899e-42	1.08085e-41
NFKB1	0.417691	0.329813	0.850751	1.89505	0.268721	0.368774	6.7483e-23	1.50088e-22
NFS1	0.0866423	0.0111404	4.82e-06	0.143181	4.82e-06	0.463919	7.74384e-155	1.99221e-153
NHLRC3	4.82e-06	4.82e-06	4.82e-06	0.351315	4.82e-06	0.932431	4.8151e-85	2.31402e-84
NIPSNAP1	4.82e-06	0.238237	4.82e-06	4.82e-06	4.82e-06	2.53028	6.53985e-76	2.70974e-75
NMNAT1	4.82e-06	0.0272071	4.82e-06	4.82e-06	4.82e-06	4.82e-06	8.52066e-26	1.93928e-25
NMT2	4.82e-06	0.00789967	4.82e-06	4.82e-06	4.82e-06	4.82e-06	3.04642e-15	6.0172e-15
NOC4L	4.82e-06	0.223273	4.82e-06	4.82e-06	4.82e-06	4.82e-06	5.35817e-19	1.12722e-18
NOL7	4.82e-06	0.0808937	4.82e-06	4.82e-06	4.82e-06	4.82e-06	1.84103e-09	3.37109e-09
NOP9	4.82e-06	0.0700288	4.82e-06	4.82e-06	4.82e-06	4.82e-06	2.02496e-18	4.23758e-18
NOSIP	4.82e-06	0.052855	4.82e-06	4.82e-06	4.82e-06	4.82e-06	5.35817e-19	1.12722e-18
NPC2	1.8272	1.4425	1.39049	0.740923	4.38517	2.07063	3.18857e-66	1.18449e-65
NPEPL1	4.82e-06	0.269922	4.82e-06	4.82e-06	4.82e-06	4.82e-06	7.23956e-43	2.06599e-42
NPL	0.761437	0.296931	4.82e-06	0.227848	4.82e-06	4.82e-06	3.0411e-64	1.10046e-63
NPRL3	0.247666	0.228472	4.82e-06	0.0796085	4.82e-06	4.82e-06	4.16747e-60	1.45904e-59
NRBP1	4.82e-06	0.105358	4.82e-06	4.82e-06	4.82e-06	4.82e-06	3.04642e-15	6.0172e-15
NRDC	0.256994	0.0299431	4.82e-06	4.82e-06	4.82e-06	4.82e-06	1.04162e-32	2.67972e-32
NT5C3A	4.82e-06	4.82e-06	4.82e-06	0.167677	4.82e-06	4.82e-06	3.13621e-104	2.04249e-103
NT5DC1	0.163102	0.0305832	4.82e-06	4.82e-06	4.82e-06	4.82e-06	1.11737e-95	6.36336e-95
NT5DC2	4.82e-06	0.0357077	4.82e-06	4.82e-06	4.82e-06	4.82e-06	1.84103e-09	3.37109e-09
NTAN1	1.69732	4.82e-06	4.82e-06	4.82e-06	9.68758	4.82e-06	6.93364e-185	4.91149e-183
NUB1	4.82e-06	0.172195	4.82e-06	4.82e-06	4.82e-06	4.82e-06	3.37513e-10	6.37894e-10
NUBP2	4.82e-06	4.82e-06	4.82e-06	0.340606	4.82e-06	4.82e-06	3.13621e-104	2.04249e-103
NUDC	3.61193	0.447428	4.82e-06	0.521033	4.82e-06	0.250573	7.1337e-133	9.15344e-132
NUDCD2	4.82e-06	4.82e-06	4.82e-06	4.82e-06	4.82e-06	0.453413	1.00689e-89	5.11455e-89
NUDT16L1	4.82e-06	0.187442	4.82e-06	4.82e-06	4.82e-06	4.82e-06	2.85914e-18	5.95432e-18
NUDT19	0.25946	4.82e-06	4.82e-06	4.82e-06	4.82e-06	0.723998	5.83279e-74	2.36004e-73
NUMB	0.137316	0.121295	0.478743	0.0880927	0.219307	0.1797	0.0030429	0.00529435
NUP37	0.175761	0.0877529	4.82e-06	4.82e-06	0.402678	4.82e-06	2.54774e-155	6.65373e-154
NUP54	4.82e-06	0.0215224	4.82e-06	0.178279	4.82e-06	4.82e-06	1.21234e-78	5.25043e-78
NUP58	4.82e-06	0.164367	4.82e-06	4.82e-06	4.82e-06	4.82e-06	8.52066e-26	1.93928e-25
NUP88	4.82e-06	4.82e-06	4.82e-06	0.224082	4.82e-06	4.82e-06	3.13621e-104	2.04249e-103
NXN	0.108493	4.82e-06	4.82e-06	4.82e-06	4.82e-06	0.373239	8.19025e-68	3.10042e-67
ODR4	4.82e-06	0.322022	4.82e-06	0.462093	4.82e-06	4.82e-06	1.30559e-56	4.39816e-56
OGA	0.992203	0.0201571	4.82e-06	0.0804809	4.82e-06	4.82e-06	3.88396e-82	1.77577e-81
OGT	0.137399	0.0378403	4.82e-06	0.2594	1.32685	0.178958	1.41366e-130	1.69607e-129
OLFML1	4.82e-06	0.035024	4.82e-06	4.82e-06	4.82e-06	4.82e-06	8.52066e-26	1.93928e-25
ORC3	0.0458635	0.0359277	4.82e-06	4.82e-06	0.152834	4.82e-06	2.14192e-143	3.6554e-142
ORMDL1	0.601569	4.82e-06	4.82e-06	0.436325	4.82e-06	3.94323	6.19274e-63	2.21304e-62
OS9	0.982723	0.824513	4.79094	0.228254	0.644525	0.96492	1.73822e-29	4.30269e-29
OSBPL2	4.82e-06	0.162819	4.82e-06	4.82e-06	4.82e-06	4.82e-06	6.83919e-30	1.69863e-29
OSGEP	4.82e-06	4.82e-06	4.82e-06	0.051723	4.82e-06	4.82e-06	1.26783e-54	4.11805e-54
OTC	4.82e-06	0.372171	4.82e-06	4.82e-06	4.82e-06	4.82e-06	5.35817e-19	1.12722e-18
OTUD7B	4.82e-06	0.0741727	4.82e-06	4.82e-06	0.144683	4.82e-06	2.41643e-166	9.39501e-165
OTULINL	4.82e-06	4.82e-06	4.82e-06	0.209768	4.82e-06	4.82e-06	3.13621e-104	2.04249e-103
OXNAD1	4.82e-06	0.481468	4.82e-06	4.82e-06	4.82e-06	4.82e-06	2.12327e-165	7.6246e-164
OXR1	4.82e-06	1.79213	4.82e-06	4.82e-06	4.82e-06	4.82e-06	3.96017e-181	2.38117e-179
P2RX3	4.82e-06	4.82e-06	3.9051	4.82e-06	4.82e-06	1.47349	2.08999e-151	4.6785e-150
P2RX4	0.181981	0.0341847	4.82e-06	0.680362	4.82e-06	0.288688	4.64582e-49	1.43338e-48
PABPC1L	0.0502566	4.82e-06	4.82e-06	4.82e-06	0.141919	4.82e-06	7.31681e-176	3.90054e-174
PACSIN3	0.0550504	0.016795	4.82e-06	4.82e-06	4.82e-06	4.82e-06	1.14914e-53	3.6908e-53
PAF1	4.82e-06	0.0323025	4.82e-06	4.82e-06	4.82e-06	0.206514	1.30253e-80	5.8214e-80
PAIP1	4.82e-06	0.195871	4.82e-06	4.82e-06	4.82e-06	4.82e-06	7.23956e-43	2.06599e-42
PAK1	0.430202	0.0115009	4.82e-06	1.04041	4.82e-06	4.82e-06	2.01628e-51	6.36908e-51
PAK3	4.82e-06	0.0110777	4.82e-06	4.82e-06	4.82e-06	4.82e-06	1.84103e-09	3.37109e-09
PALD1	0.0563326	4.82e-06	4.82e-06	4.82e-06	4.82e-06	4.82e-06	3.86899e-42	1.08085e-41
PALM	4.82e-06	0.0435643	4.82e-06	0.133805	1.48846	4.82e-06	4.76922e-177	2.68061e-175
PAPOLA	0.142203	0.168271	4.82e-06	4.82e-06	4.82e-06	4.82e-06	2.19076e-64	7.94977e-64
PAPPA2	0.293771	0.154701	4.82e-06	4.82e-06	4.82e-06	4.82e-06	2.41318e-56	8.10297e-56
PARN	4.82e-06	0.105112	4.82e-06	4.82e-06	4.82e-06	4.82e-06	7.23956e-43	2.06599e-42
PAWR	0.69278	0.451493	1.05208	2.43273	0.541311	0.343741	3.84791e-23	8.57284e-23
PBXIP1	0.503953	0.146461	1.08111	4.82e-06	0.525888	0.18141	4.98699e-78	2.14184e-77
PCDH1	0.156553	0.0117086	4.82e-06	4.82e-06	4.82e-06	4.82e-06	1.17797e-36	3.14308e-36
PCDHGC3	4.82e-06	0.026445	4.82e-06	4.82e-06	4.82e-06	4.82e-06	3.04642e-15	6.0172e-15
PCF11	4.82e-06	0.00901312	4.82e-06	4.82e-06	4.82e-06	4.82e-06	1.84103e-09	3.37109e-09
PCSK1N	4.82e-06	0.61258	4.82e-06	0.783711	1.64293	0.53534	2.38498e-107	1.79516e-106
PCYOX1L	0.21482	0.0704515	1.43088	4.82e-06	4.82e-06	4.82e-06	2.26924e-147	4.36218e-146
PCYT1A	0.0823878	0.0248696	4.82e-06	4.82e-06	4.82e-06	4.82e-06	1.23206e-87	6.09079e-87
PCYT1B	4.82e-06	0.0207888	4.82e-06	4.82e-06	4.82e-06	4.82e-06	5.35817e-19	1.12722e-18
PCYT2	4.82e-06	0.0222384	4.82e-06	0.246652	2.32794	4.82e-06	1.76789e-174	8.96251e-173
PDCL3	4.82e-06	4.82e-06	4.82e-06	4.82e-06	4.82e-06	0.102225	1.00689e-89	5.11455e-89
PDE5A	4.82e-06	0.121359	0.619898	0.134392	4.82e-06	4.82e-06	4.13017e-158	1.17995e-156
PDE8A	4.82e-06	4.82e-06	4.82e-06	0.94339	4.82e-06	4.82e-06	3.13621e-104	2.04249e-103
PDHA2	0.047745	4.82e-06	4.82e-06	4.82e-06	4.82e-06	4.82e-06	3.86899e-42	1.08085e-41
PDK4	4.82e-06	4.82e-06	4.82e-06	4.82e-06	4.82e-06	0.851549	1.92009e-97	1.10689e-96
PDLIM2	4.82e-06	0.233412	4.82e-06	0.214912	4.82e-06	1.64201	1.02428e-69	3.94089e-69
PDLIM4	4.82e-06	0.0437997	4.82e-06	4.82e-06	4.82e-06	4.82e-06	1.84103e-09	3.37109e-09
PDP1	4.82e-06	4.82e-06	4.82e-06	0.0178742	4.82e-06	0.480584	1.09143e-85	5.29435e-85
PDPR	0.368017	1.13866	0.245439	0.163708	4.82e-06	0.310784	2.30595e-126	2.51563e-125
PDZD11	0.182556	0.0198116	4.82e-06	0.968347	4.82e-06	4.82e-06	6.38216e-37	1.7073e-36
PEA15	1.04151	0.496141	1.55207	3.73679	0.280614	0.431323	4.80955e-12	9.19075e-12
PEAK1	0.940607	1.77415	0.759761	0.514451	0.480457	4.82e-06	7.99753e-120	7.53283e-119
PEF1	4.82e-06	4.82e-06	4.82e-06	0.174796	4.82e-06	4.82e-06	3.13621e-104	2.04249e-103
PELO	4.82e-06	0.122802	4.82e-06	4.82e-06	4.82e-06	4.82e-06	5.35817e-19	1.12722e-18
PELP1	4.82e-06	0.0144829	4.82e-06	4.82e-06	4.82e-06	0.131905	7.08532e-88	3.51952e-87
PES1	4.82e-06	0.0783138	4.82e-06	0.392939	1.70626	4.82e-06	1.59078e-184	1.08236e-182
PEX1	4.82e-06	4.82e-06	4.82e-06	4.82e-06	4.82e-06	0.575089	1.92009e-97	1.10689e-96
PFDN2	4.82e-06	0.159465	4.82e-06	4.43686	4.82e-06	4.82e-06	4.84349e-85	2.32551e-84
PFKFB1	4.82e-06	0.00569853	4.82e-06	4.82e-06	4.82e-06	4.82e-06	3.04642e-15	6.0172e-15
PFKFB3	4.82e-06	0.00677295	4.82e-06	4.82e-06	4.82e-06	4.82e-06	3.04642e-15	6.0172e-15
PFKFB4	4.82e-06	0.00931908	4.82e-06	4.82e-06	4.82e-06	4.82e-06	3.04642e-15	6.0172e-15
PFN2	4.82e-06	0.696018	4.82e-06	4.82e-06	4.82e-06	0.395707	1.02761e-112	8.39459e-112
PGLYRP1	4.82e-06	0.223209	4.82e-06	0.309065	4.82e-06	1.43988	1.78375e-70	6.94562e-70
PGP	0.280885	4.82e-06	4.82e-06	4.82e-06	4.82e-06	1.61388	6.32023e-68	2.39428e-67
PGRMC2	0.686781	0.3738	4.82e-06	0.114838	4.82e-06	0.326797	7.41784e-82	3.35881e-81
PHF10	4.82e-06	4.82e-06	4.82e-06	4.82e-06	4.82e-06	0.90627	1.00689e-89	5.11455e-89
PHF6	4.82e-06	4.82e-06	4.82e-06	0.228251	4.82e-06	4.82e-06	3.13621e-104	2.04249e-103
PHKB	0.280461	0.11555	1.19454	0.223431	4.82e-06	4.82e-06	6.07688e-153	1.45479e-151
PI4K2A	4.82e-06	0.0414683	4.82e-06	4.82e-06	4.82e-06	4.82e-06	7.94537e-17	1.63362e-16
PI4KAP1	4.82e-06	4.82e-06	4.82e-06	4.82e-06	4.82e-06	1.82762	1.92009e-97	1.10689e-96
PIGS	4.82e-06	4.82e-06	4.82e-06	1.43788	4.82e-06	4.82e-06	3.13621e-104	2.04249e-103
PIGU	4.82e-06	0.158379	4.82e-06	4.82e-06	4.82e-06	4.82e-06	1.84103e-09	3.37109e-09
PIH1D1	0.563912	0.0249439	1.53442	0.411237	0.30337	0.194273	7.4425e-74	3.009e-73
PIK3AP1	4.82e-06	0.0283686	4.82e-06	4.82e-06	4.82e-06	4.82e-06	8.52066e-26	1.93928e-25
PIK3C3	4.82e-06	4.82e-06	4.82e-06	0.169507	4.82e-06	4.82e-06	3.13621e-104	2.04249e-103
PIK3R1	4.82e-06	0.00491714	4.82e-06	0.301382	4.82e-06	4.82e-06	4.14823e-85	1.99725e-84
PIK3R2	4.82e-06	0.0319574	4.82e-06	4.82e-06	4.82e-06	4.82e-06	8.52066e-26	1.93928e-25
PIP4K2B	4.82e-06	0.0193026	4.82e-06	4.82e-06	4.82e-06	4.82e-06	1.84103e-09	3.37109e-09
PIP4K2C	0.120166	0.0272342	4.82e-06	0.118829	0.307405	0.151507	4.88501e-94	2.71617e-93
PIPOX	4.82e-06	4.82e-06	4.82e-06	2.54804	4.82e-06	4.82e-06	3.13621e-104	2.04249e-103
PIPSL	4.82e-06	0.0108156	4.82e-06	4.82e-06	4.82e-06	4.82e-06	1.84103e-09	3.37109e-09
PKHD1L1	4.82e-06	0.00611645	4.82e-06	4.82e-06	4.82e-06	4.82e-06	8.52066e-26	1.93928e-25
PLA2G15	4.82e-06	0.0275845	4.82e-06	4.82e-06	4.82e-06	4.82e-06	5.35817e-19	1.12722e-18
PLA2G4A	0.0593138	4.82e-06	4.82e-06	4.82e-06	4.82e-06	4.82e-06	2.41365e-47	7.2733e-47
PLCB3	0.230604	0.246794	0.239643	1.5703	0.161702	0.25984	0.0396558	0.0680811
PLCG1	0.0557047	0.0324121	4.82e-06	4.82e-06	4.82e-06	4.82e-06	1.31455e-53	4.21944e-53
PLD1	4.82e-06	0.0149738	4.82e-06	4.82e-06	4.82e-06	4.82e-06	8.52066e-26	1.93928e-25
PLD4	4.82e-06	0.00739487	4.82e-06	4.82e-06	4.82e-06	4.82e-06	3.04642e-15	6.0172e-15
PLEKHA6	4.82e-06	0.0121768	4.82e-06	4.82e-06	4.82e-06	4.82e-06	1.84103e-09	3.37109e-09
PLIN4	0.067607	4.82e-06	4.82e-06	4.82e-06	4.82e-06	4.82e-06	3.86899e-42	1.08085e-41
PLOD2	4.82e-06	0.0496231	4.82e-06	4.82e-06	4.82e-06	0.149235	1.31997e-74	5.38292e-74
PNLIPRP2	4.82e-06	0.0206126	4.82e-06	0.0219452	4.82e-06	0.223209	2.1379e-69	8.20111e-69
PNO1	4.82e-06	4.82e-06	4.82e-06	0.292644	4.82e-06	4.82e-06	1.93461e-45	5.67113e-45
PNPLA6	0.0478563	0.0309903	4.82e-06	4.82e-06	4.82e-06	4.82e-06	7.86417e-70	3.03249e-69
PODXL2	4.82e-06	0.168764	4.82e-06	4.82e-06	4.82e-06	4.82e-06	5.35817e-19	1.12722e-18
POFUT1	4.82e-06	0.00555415	4.82e-06	4.82e-06	4.82e-06	4.82e-06	1.84103e-09	3.37109e-09
POFUT2	0.666833	0.118747	4.82e-06	4.82e-06	4.82e-06	4.82e-06	2.83433e-49	8.75528e-49
POLD2	4.82e-06	4.82e-06	4.82e-06	4.82e-06	4.82e-06	1.86191	1.92009e-97	1.10689e-96
POLR2C	4.82e-06	0.0220848	4.82e-06	0.210259	4.82e-06	4.82e-06	7.13095e-85	3.41427e-84
POLR2D	4.82e-06	0.160046	4.82e-06	4.82e-06	4.82e-06	4.82e-06	5.35817e-19	1.12722e-18
POLRMT	4.82e-06	0.0317126	4.82e-06	4.82e-06	4.82e-06	4.82e-06	8.52066e-26	1.93928e-25
POM121	4.82e-06	0.0331879	4.82e-06	4.82e-06	4.82e-06	4.82e-06	8.52066e-26	1.93928e-25
POM121C	4.82e-06	0.0342099	4.82e-06	4.82e-06	4.82e-06	4.82e-06	8.52066e-26	1.93928e-25
PON2	4.8403	8.24088	4.52094	7.58624	4.01902	15.815	2.95038e-31	7.46764e-31
PPIF	4.82e-06	0.043779	4.82e-06	0.479703	4.82e-06	4.82e-06	4.59522e-118	4.19081e-117
PPIL1	0.154426	4.82e-06	1.25149	0.34918	4.82e-06	4.82e-06	3.94486e-150	8.3602e-149
PPP1R14A	4.82e-06	4.82e-06	4.82e-06	0.207179	4.82e-06	4.82e-06	3.13621e-104	2.04249e-103
PPP1R14B	4.82e-06	0.0425803	4.82e-06	4.82e-06	4.82e-06	4.82e-06	3.04642e-15	6.0172e-15
PPP2CA	1.00326	1.50658	0.844724	3.83098	4.82e-06	0.544611	8.29283e-114	6.88318e-113
PPP2CB	1.00238	1.50658	4.82e-06	3.83186	4.82e-06	0.557848	2.86076e-152	6.54557e-151
PPP2R2B	0.676907	4.82e-06	4.82e-06	4.82e-06	4.82e-06	4.82e-06	1.30969e-95	7.43401e-95
PPP2R2C	0.107566	0.047007	4.82e-06	4.82e-06	4.82e-06	4.82e-06	3.23772e-100	1.99788e-99
PPP2R5C	3.30823	4.82e-06	4.82e-06	4.82e-06	4.82e-06	4.82e-06	2.41365e-47	7.2733e-47
PPP3CA	0.272755	0.417886	1.02813	0.400516	0.355906	0.294277	1.9629e-07	3.52803e-07
PPP4C	4.82e-06	0.136478	4.82e-06	0.21968	0.592344	4.82e-06	9.24783e-163	3.06542e-161
PPP4R3A	0.117294	0.0594039	0.624019	0.108093	0.140166	0.287323	4.60677e-79	2.01707e-78
PPP6C	0.0647116	0.0130671	4.82e-06	0.193429	4.82e-06	4.82e-06	7.0008e-30	1.7371e-29
PPP6R2	4.82e-06	4.82e-06	4.82e-06	4.82e-06	4.82e-06	0.105522	1.00689e-89	5.11455e-89
PPT1	0.188858	1.24576	0.29283	0.124796	4.82e-06	4.82e-06	1.52358e-130	1.8195e-129
PQBP1	4.82e-06	4.82e-06	4.82e-06	1.48172	4.82e-06	4.82e-06	3.13621e-104	2.04249e-103
PRAG1	4.82e-06	0.0183527	0.560619	4.82e-06	4.82e-06	4.82e-06	5.46523e-194	5.23346e-192
PRH1	1.22975	3.44125	0.769797	8.90249	2.38582	0.221625	1.10774e-65	4.08861e-65
PRMT1	1.35923	0.881954	1.12337	2.51072	0.565336	0.894917	3.48963e-13	6.74827e-13
PRMT3	0.0401406	0.00719251	4.82e-06	4.82e-06	0.144702	4.82e-06	2.18507e-173	1.06594e-171
PRPF3	0.0546415	0.017542	4.82e-06	0.118184	4.82e-06	4.82e-06	2.37467e-32	6.08194e-32
PRPF31	0.172412	0.0898599	4.82e-06	0.0724286	4.82e-06	4.82e-06	1.22577e-81	5.5406e-81
PRPS2	4.82e-06	0.0627639	4.82e-06	4.82e-06	4.82e-06	4.82e-06	3.04642e-15	6.0172e-15
PRRC1	0.789576	0.177067	4.82e-06	4.82e-06	4.82e-06	4.82e-06	2.7681e-116	2.39763e-115
PRRC2A	0.128416	0.0701212	0.304188	0.0912134	0.0970494	0.148217	7.38394e-50	2.28774e-49
PRSS57	0.337702	0.764238	4.82e-06	1.62243	4.82e-06	4.82e-06	4.46241e-127	4.93058e-126
PRSS8	4.82e-06	4.82e-06	4.82e-06	0.0692264	4.82e-06	4.82e-06	1.26783e-54	4.11805e-54
PRUNE1	1.66531	0.844705	0.975421	0.499043	4.82e-06	0.560821	1.0577e-135	1.45076e-134
PRUNE2	4.82e-06	0.0282114	4.82e-06	4.82e-06	4.82e-06	4.82e-06	8.52066e-26	1.93928e-25
PRX	4.82e-06	0.0323963	4.82e-06	4.82e-06	4.82e-06	4.82e-06	5.35817e-19	1.12722e-18
PRXL2A	4.82e-06	4.82e-06	4.82e-06	0.244691	4.82e-06	4.82e-06	4.65319e-156	1.25977e-154
PRXL2B	4.82e-06	0.138803	4.82e-06	4.82e-06	4.82e-06	4.82e-06	1.84103e-09	3.37109e-09
PSMA2	0.570203	0.496858	0.657678	2.32334	0.419649	0.543274	0.000581144	0.00101489
PSMD7	11.1117	3.24309	4.82e-06	2.0114	1.49028	1.47286	1.73174e-72	6.90957e-72
PSME3IP1	4.82e-06	0.115748	4.82e-06	0.375989	4.82e-06	4.82e-06	4.19795e-137	6.08055e-136
PSME4	4.82e-06	4.82e-06	4.82e-06	0.0370069	4.82e-06	0.166565	2.20323e-85	1.06376e-84
PSMF1	0.996476	4.82e-06	4.82e-06	4.82e-06	4.82e-06	4.82e-06	3.27228e-120	3.10476e-119
PTBP2	4.82e-06	0.0202005	4.82e-06	4.82e-06	4.82e-06	4.82e-06	3.04642e-15	6.0172e-15
PTBP3	0.575673	4.82e-06	4.82e-06	4.82e-06	4.82e-06	4.82e-06	3.86899e-42	1.08085e-41
PTGES2	0.293347	0.126197	0.922621	4.82e-06	0.174197	0.259747	3.58678e-84	1.69691e-83
PTGES3	0.244501	0.580907	4.82e-06	0.159447	4.82e-06	4.82e-06	4.701e-104	3.05005e-103
PTGS1	4.82e-06	0.0882407	4.82e-06	0.268715	4.82e-06	4.82e-06	5.97215e-33	1.54179e-32
PTPN12	0.258564	0.147747	0.21913	0.663453	0.120233	0.0758132	1.33536e-40	3.69062e-40
PTPN13	0.0963935	0.277452	4.82e-06	0.0844229	4.82e-06	4.82e-06	2.94286e-101	1.83344e-100
PTPRA	4.82e-06	0.00677023	4.82e-06	0.264804	4.82e-06	4.82e-06	2.52421e-85	1.21647e-84
PTPRT	4.82e-06	0.00535174	4.82e-06	4.82e-06	4.82e-06	4.82e-06	3.04642e-15	6.0172e-15
PTX3	0.357925	0.150059	4.82e-06	2.11156	4.82e-06	4.82e-06	1.09292e-91	5.91158e-91
PUM1	4.82e-06	0.039124	4.82e-06	4.82e-06	4.82e-06	4.82e-06	5.35817e-19	1.12722e-18
PXN	0.212085	0.291599	0.25547	2.31557	0.117749	0.0781369	2.87249e-51	9.0571e-51
PYCR3	4.82e-06	0.0595888	4.82e-06	4.82e-06	4.82e-06	4.82e-06	1.84103e-09	3.37109e-09
PYHIN1	4.82e-06	4.82e-06	4.82e-06	4.82e-06	3.29691	15.6543	1.33961e-201	2.03739e-199
QKI	4.82e-06	0.0217974	4.82e-06	0.139304	4.82e-06	4.82e-06	3.19445e-82	1.46441e-81
QPRT	4.82e-06	0.046064	4.82e-06	4.82e-06	4.82e-06	0.239186	1.41401e-80	6.31422e-80
QTRT1	0.0440828	0.022874	4.82e-06	0.120164	0.271596	4.82e-06	1.06707e-152	2.49676e-151
RAB11FIP2	4.82e-06	0.113159	4.82e-06	4.82e-06	0.434844	4.82e-06	6.36463e-193	5.77395e-191
RAB13	0.24454	0.0973169	0.419283	1.02483	0.232233	4.82e-06	3.3197e-113	2.72912e-112
RAB22A	4.82e-06	0.145134	4.82e-06	4.82e-06	4.82e-06	4.82e-06	5.35817e-19	1.12722e-18
RAB23	4.82e-06	4.82e-06	4.82e-06	0.0259967	4.82e-06	4.82e-06	1.93461e-45	5.67113e-45
RAB29	4.82e-06	4.82e-06	4.82e-06	0.217003	4.82e-06	4.82e-06	3.13621e-104	2.04249e-103
RAB31	0.80619	4.82e-06	4.82e-06	4.82e-06	4.82e-06	4.82e-06	2.41365e-47	7.2733e-47
RAB32	0.594767	4.82e-06	3.08025	0.426576	4.82e-06	4.82e-06	2.29539e-155	6.02511e-154
RAB34	4.82e-06	0.403794	4.82e-06	4.82e-06	4.82e-06	4.82e-06	7.23956e-43	2.06599e-42
RAB3D	4.82e-06	4.82e-06	4.82e-06	0.198445	4.82e-06	4.82e-06	1.93461e-45	5.67113e-45
RAB3GAP1	0.17214	0.0318124	4.82e-06	4.82e-06	4.82e-06	0.380879	8.17674e-86	3.97013e-85
RAB3GAP2	0.264673	0.207156	0.688689	0.187636	0.130801	4.82e-06	9.62071e-131	1.16235e-129
RAB4A	0.305388	0.718923	4.82e-06	0.398359	4.82e-06	4.82e-06	1.76244e-149	3.64544e-148
RAB6C	4.82e-06	4.82e-06	4.82e-06	4.82e-06	4.82e-06	0.359957	1.00689e-89	5.11455e-89
RABEP1	0.10871	4.82e-06	4.82e-06	4.82e-06	4.82e-06	4.82e-06	2.41365e-47	7.2733e-47
RAI14	4.82e-06	0.00912417	4.82e-06	0.0853984	4.82e-06	4.82e-06	6.55365e-39	1.79022e-38
RANBP1	0.247101	0.00807893	4.82e-06	4.82e-06	4.82e-06	4.82e-06	9.01439e-34	2.34003e-33
RAP2B	4.82e-06	4.82e-06	4.82e-06	0.147177	4.82e-06	4.82e-06	3.13621e-104	2.04249e-103
RAPGEF2	0.0559415	0.0172852	4.82e-06	4.82e-06	4.82e-06	4.82e-06	1.36831e-50	4.27267e-50
RASAL3	0.126082	4.82e-06	4.82e-06	4.82e-06	4.82e-06	4.82e-06	2.19076e-64	7.94977e-64
RBFA	4.82e-06	0.05642	4.82e-06	4.82e-06	0.393089	4.82e-06	8.18207e-182	5.03684e-180
RBFOX1	4.82e-06	4.82e-06	4.82e-06	0.381954	4.82e-06	4.82e-06	3.13621e-104	2.04249e-103
RBFOX2	4.82e-06	4.82e-06	4.82e-06	0.375982	4.82e-06	4.82e-06	3.13621e-104	2.04249e-103
RBM17	0.216912	0.00980944	4.82e-06	0.0700669	0.677873	0.0323857	1.00261e-107	7.60192e-107
RBM22	4.82e-06	0.0391893	4.82e-06	4.82e-06	4.82e-06	4.82e-06	3.04642e-15	6.0172e-15
RBM23	4.82e-06	0.0336057	4.82e-06	4.82e-06	4.82e-06	4.82e-06	8.52066e-26	1.93928e-25
RBM4	4.82e-06	4.82e-06	4.82e-06	4.82e-06	4.82e-06	0.236373	1.00689e-89	5.11455e-89
RBM47	0.837754	0.413031	1.50144	0.475172	0.339793	0.706704	1.43039e-14	2.7901e-14
RBM5	0.357012	4.82e-06	4.82e-06	4.82e-06	4.82e-06	4.82e-06	2.41365e-47	7.2733e-47
RBMXL2	4.82e-06	0.00529757	4.82e-06	4.82e-06	4.82e-06	4.82e-06	3.04642e-15	6.0172e-15
RBSN	4.82e-06	0.0312815	4.82e-06	4.82e-06	4.82e-06	4.82e-06	7.23956e-43	2.06599e-42
RCN3	0.224782	4.82e-06	1.51938	0.0536201	0.330658	4.82e-06	5.23094e-156	1.40881e-154
RCSD1	4.82e-06	0.0512816	4.82e-06	0.250524	4.82e-06	4.82e-06	7.51476e-65	2.75009e-64
RECQL	0.532645	0.201043	0.390584	0.798409	0.347302	1.77258	8.64047e-26	1.96568e-25
REEP3	2.82104	2.50677	4.82e-06	2.96483	7.43387	4.82e-06	2.09974e-153	5.14585e-152
RELN	4.82e-06	0.0107354	4.82e-06	4.82e-06	4.82e-06	4.82e-06	8.52066e-26	1.93928e-25
RENBP	4.82e-06	0.0365189	4.82e-06	0.298179	4.82e-06	4.82e-06	1.19776e-78	5.19165e-78
RFC1	4.82e-06	0.173833	4.82e-06	0.219851	4.82e-06	0.676793	2.94474e-71	1.15708e-70
RFC4	4.82e-06	0.0811174	4.82e-06	4.82e-06	4.82e-06	4.82e-06	1.84103e-09	3.37109e-09
RGN	1.16012	4.82e-06	4.82e-06	4.82e-06	4.82e-06	2.52353	9.06287e-74	3.6584e-73
RHOA	0.330075	0.511574	1.2953	0.442616	0.450078	4.82e-06	6.09515e-121	5.83667e-120
RHOT1	4.82e-06	0.0126774	4.82e-06	4.82e-06	4.82e-06	4.82e-06	1.84103e-09	3.37109e-09
RHOT2	0.138021	4.82e-06	4.82e-06	4.82e-06	0.374339	4.82e-06	2.50716e-175	1.30955e-173
RIC8A	4.82e-06	0.0173964	4.82e-06	4.82e-06	4.82e-06	0.190327	1.7557e-69	6.74998e-69
RIF1	4.82e-06	0.0199297	4.82e-06	4.82e-06	4.82e-06	4.82e-06	5.35817e-19	1.12722e-18
RIPK2	4.82e-06	0.0280098	4.82e-06	4.82e-06	4.82e-06	4.82e-06	8.52066e-26	1.93928e-25
RMC1	1.42729	0.580749	4.82e-06	2.50342	4.82e-06	4.82e-06	1.31166e-34	3.43421e-34
RMDN1	4.82e-06	0.0484878	4.82e-06	0.183014	4.82e-06	4.82e-06	4.05866e-76	1.68573e-75
RMDN3	4.82e-06	4.82e-06	4.82e-06	1.39835	4.82e-06	4.82e-06	3.50697e-166	1.32369e-164
RNASE3	4.82e-06	0.218775	4.82e-06	4.82e-06	4.82e-06	4.82e-06	8.52066e-26	1.93928e-25
RNASEH2A	4.82e-06	0.0461656	4.82e-06	4.82e-06	4.82e-06	4.82e-06	6.83919e-30	1.69863e-29
RNF2	4.82e-06	4.82e-06	4.82e-06	0.614837	4.82e-06	4.82e-06	3.13621e-104	2.04249e-103
RNF20	4.82e-06	0.0210775	4.82e-06	4.82e-06	4.82e-06	4.82e-06	5.35817e-19	1.12722e-18
RNMT	4.82e-06	0.277814	4.82e-06	4.82e-06	0.64638	4.82e-06	2.70338e-172	1.24814e-170
RNPS1	4.82e-06	0.0187193	4.82e-06	4.82e-06	4.82e-06	4.82e-06	3.04642e-15	6.0172e-15
RO60	0.815273	0.0984395	4.82e-06	4.82e-06	4.82e-06	4.82e-06	1.63041e-133	2.1344e-132
ROBO2	4.82e-06	0.0330326	4.82e-06	4.82e-06	4.82e-06	4.82e-06	5.35817e-19	1.12722e-18
RPE	4.82e-06	0.103896	4.82e-06	4.82e-06	4.82e-06	4.82e-06	1.84103e-09	3.37109e-09
RPL10	0.646748	4.82e-06	4.82e-06	4.82e-06	4.82e-06	4.82e-06	3.86899e-42	1.08085e-41
RPL10A	0.539985	0.876238	4.82e-06	0.712946	0.840999	1.6864	1.47625e-87	7.28407e-87
RPL11	1.17416	2.65142	0.43031	0.325512	4.82e-06	0.0967609	1.2185e-118	1.11916e-117
RPL12	0.331163	0.0468377	4.82e-06	4.82e-06	4.82e-06	4.82e-06	6.43619e-115	5.44706e-114
RPL13AP3	4.82e-06	0.0514627	4.82e-06	4.82e-06	4.82e-06	4.82e-06	1.84103e-09	3.37109e-09
RPL17	1.25962	0.622016	4.82e-06	4.82e-06	4.82e-06	0.581439	5.77475e-87	2.82777e-86
RPL18	0.612581	4.82e-06	4.82e-06	4.82e-06	4.82e-06	4.82e-06	3.86899e-42	1.08085e-41
RPL19	0.299124	0.264874	1.32331	0.155634	4.82e-06	0.498656	4.17609e-119	3.86999e-118
RPL23A	4.82e-06	0.132146	4.82e-06	4.82e-06	4.82e-06	4.82e-06	5.35817e-19	1.12722e-18
RPL34	0.358066	4.82e-06	0.745471	0.346298	4.82e-06	4.82e-06	6.08929e-150	1.27999e-148
RPL35	1.72285	0.0199672	4.82e-06	4.82e-06	4.82e-06	4.82e-06	2.28457e-108	1.75535e-107
RPL7A	4.82e-06	4.82e-06	4.76904	4.82e-06	4.82e-06	4.82e-06	9.15363e-220	9.46669e-217
RPL7L1	4.82e-06	0.0184477	4.82e-06	4.82e-06	4.82e-06	4.82e-06	1.84103e-09	3.37109e-09
RPLP1	0.214928	0.0792729	4.82e-06	4.82e-06	4.82e-06	4.82e-06	5.35654e-59	1.84044e-58
RPS21	4.82e-06	0.14294	4.82e-06	0.480253	4.82e-06	4.82e-06	1.14675e-32	2.94432e-32
RPS24	20.4903	0.347707	2.50604	4.82e-06	1.43041	4.21549	3.90466e-117	3.47521e-116
RPS26P11	4.82e-06	0.166776	4.82e-06	1.87908	4.82e-06	4.82e-06	2.29773e-78	9.89307e-78
RPS28	4.82e-06	0.287628	1.01788	0.344283	4.82e-06	4.82e-06	7.54327e-146	1.37831e-144
RPS9	1.1234	0.365608	6.53501	2.41984	1.2315	0.220999	9.1555e-70	3.5278e-69
RPTOR	4.82e-06	0.0056365	4.82e-06	4.82e-06	4.82e-06	4.82e-06	3.04642e-15	6.0172e-15
RRAD	0.461626	0.278106	4.82e-06	4.82e-06	1.07869	4.82e-06	5.53967e-151	1.2138e-149
RRM1	4.82e-06	4.82e-06	4.82e-06	0.370812	4.82e-06	4.82e-06	3.50697e-166	1.32369e-164
RRM2B	4.82e-06	0.711397	4.82e-06	0.116346	4.82e-06	4.82e-06	1.82912e-171	8.29684e-170
RRP1B	4.82e-06	0.0302835	4.82e-06	0.0916529	4.82e-06	4.82e-06	1.19552e-38	3.24856e-38
RTN4R	4.82e-06	4.82e-06	4.82e-06	4.82e-06	4.82e-06	0.163047	1.00689e-89	5.11455e-89
RUFY3	0.312723	4.82e-06	4.82e-06	4.82e-06	4.82e-06	4.82e-06	2.41365e-47	7.2733e-47
RXRA	4.82e-06	0.0296413	4.82e-06	4.82e-06	4.82e-06	4.82e-06	1.84103e-09	3.37109e-09
RXRB	4.82e-06	0.0137076	4.82e-06	4.82e-06	4.82e-06	4.82e-06	1.84103e-09	3.37109e-09
RXRG	4.82e-06	0.0162321	4.82e-06	4.82e-06	4.82e-06	4.82e-06	1.84103e-09	3.37109e-09
S100A10	4.82e-06	4.82e-06	4.82e-06	1.10933	4.82e-06	4.82e-06	3.13621e-104	2.04249e-103
S100A13	0.188821	4.82e-06	4.82e-06	0.601642	4.82e-06	4.82e-06	4.14755e-41	1.14997e-40
S100A14	0.332244	0.0775771	4.82e-06	4.82e-06	4.82e-06	4.82e-06	4.96071e-39	1.3558e-38
SAP18	4.82e-06	0.0109505	4.82e-06	4.82e-06	4.82e-06	0.134208	7.097e-202	1.14683e-199
SARDH	4.82e-06	0.0294857	4.82e-06	4.82e-06	4.82e-06	4.82e-06	8.52066e-26	1.93928e-25
SASH3	4.82e-06	0.122312	4.82e-06	0.264696	4.82e-06	4.82e-06	2.70026e-56	9.05514e-56
SBF1	0.238555	0.0803551	0.224834	0.535934	0.236871	0.109192	0.000769642	0.00134272
SBNO1	0.0318124	0.148717	4.82e-06	4.82e-06	4.82e-06	4.82e-06	6.22997e-36	1.64699e-35
SCAF1	0.0519833	4.82e-06	4.82e-06	4.82e-06	4.82e-06	4.82e-06	3.86899e-42	1.08085e-41
SCD	0.962267	0.482003	4.82e-06	4.82e-06	4.82e-06	4.82e-06	1.9362e-76	8.10697e-76
SCFD2	4.82e-06	4.82e-06	4.82e-06	0.0595192	4.82e-06	4.82e-06	1.26783e-54	4.11805e-54
SCGN	4.82e-06	4.82e-06	4.82e-06	0.180832	4.82e-06	4.82e-06	1.26783e-54	4.11805e-54
SCRN2	0.39271	4.82e-06	4.82e-06	4.82e-06	4.82e-06	4.82e-06	2.41365e-47	7.2733e-47
SCYL3	4.82e-06	0.00774262	4.82e-06	4.82e-06	4.82e-06	4.82e-06	3.04642e-15	6.0172e-15
SDF4	0.170369	0.0284976	4.82e-06	0.38394	4.82e-06	4.82e-06	1.53666e-101	9.61991e-101
SDSL	4.82e-06	0.133247	4.82e-06	4.82e-06	4.82e-06	0.259592	1.25504e-71	4.95028e-71
SEC14L3	4.82e-06	0.050151	4.82e-06	0.464439	4.82e-06	4.82e-06	7.86269e-77	3.32445e-76
SEC24D	0.0313976	0.0268274	0.157103	0.346964	4.82e-06	0.0989353	9.09561e-114	7.5374e-113
SEC61A2	4.82e-06	4.82e-06	4.82e-06	4.82e-06	4.82e-06	0.215948	1.92009e-97	1.10689e-96
SELENOW	4.82e-06	4.82e-06	4.82e-06	4.82e-06	4.82e-06	0.236616	1.92009e-97	1.10689e-96
SELP	0.0395981	0.0142442	4.82e-06	4.82e-06	0.147336	4.82e-06	8.35029e-161	2.58559e-159
SEMA3B	4.82e-06	0.0188961	4.82e-06	4.82e-06	4.82e-06	4.82e-06	6.83919e-30	1.69863e-29
SEMA7A	0.0820198	0.0391234	0.296639	0.0525389	4.82e-06	0.097181	3.74578e-79	1.64426e-78
SEPTIN1	0.20526	4.82e-06	4.82e-06	4.82e-06	4.82e-06	0.613617	2.16043e-176	1.20124e-174
SERPINA2	0.116241	0.158308	0.181002	1.29769	0.0565871	0.0148455	5.74157e-47	1.72014e-46
SERPINB8	0.33585	0.243712	0.165171	0.0113248	0.0949002	0.125161	4.09064e-57	1.38343e-56
SESTD1	0.0256643	0.0371019	0.142219	4.82e-06	0.0555358	4.82e-06	1.50517e-136	2.1237e-135
SET	0.1041	0.297415	0.402239	1.26633	0.210331	0.0927266	8.44201e-55	2.78226e-54
SETD3	4.82e-06	0.0138507	4.82e-06	4.82e-06	4.82e-06	4.82e-06	3.04642e-15	6.0172e-15
SETSIP	0.05098	4.82e-06	4.82e-06	0.413288	4.82e-06	0.0958774	1.20255e-77	5.14767e-77
SF3B6	6.64918	1.71087	7.21556	16.3225	4.82e-06	5.43047	1.57564e-102	1.00094e-101
SGSH	0.928395	0.216847	4.82e-06	0.352098	4.82e-06	4.82e-06	5.09201e-133	6.58269e-132
SH2B1	4.82e-06	0.0991678	4.82e-06	4.82e-06	4.82e-06	4.82e-06	1.84103e-09	3.37109e-09
SH3GL1	0.0529619	0.014906	4.82e-06	4.82e-06	4.82e-06	0.336511	2.45982e-66	9.14432e-66
SH3GLB1	0.167926	0.250902	4.82e-06	4.82e-06	0.0775125	4.82e-06	8.60419e-141	1.36479e-139
SHC1	4.82e-06	4.82e-06	4.82e-06	4.82e-06	4.82e-06	0.379305	1.00689e-89	5.11455e-89
SIGLEC1	4.82e-06	0.0615165	4.82e-06	4.82e-06	4.82e-06	4.82e-06	5.35817e-19	1.12722e-18
SIN3A	0.722591	2.51854	0.969746	0.173664	0.811712	0.813747	6.78928e-35	1.78391e-34
SLAIN2	0.148862	4.82e-06	4.82e-06	4.82e-06	4.82e-06	4.82e-06	3.86899e-42	1.08085e-41
SLC12A5	0.172125	4.82e-06	4.82e-06	4.82e-06	4.82e-06	4.82e-06	2.41365e-47	7.2733e-47
SLC12A7	0.454979	0.281253	1.40222	4.82e-06	0.666894	0.246188	2.04987e-80	9.14569e-80
SLC12A9	4.82e-06	0.0396139	4.82e-06	4.82e-06	4.82e-06	4.82e-06	8.52066e-26	1.93928e-25
SLC15A1	4.82e-06	0.0228108	4.82e-06	4.82e-06	4.82e-06	4.82e-06	8.52066e-26	1.93928e-25
SLC1A2	4.82e-06	4.82e-06	4.82e-06	4.82e-06	4.82e-06	0.820105	1.00689e-89	5.11455e-89
SLC25A22	4.82e-06	0.0594795	4.82e-06	4.82e-06	4.82e-06	0.249929	2.9708e-67	1.11319e-66
SLC25A31	0.0681361	4.82e-06	4.82e-06	0.0180504	0.151949	4.82e-06	1.12882e-158	3.27928e-157
SLC27A1	4.82e-06	0.326884	4.82e-06	4.82e-06	4.82e-06	4.82e-06	5.35817e-19	1.12722e-18
SLC27A3	0.188712	1.08	4.82e-06	4.82e-06	4.82e-06	4.82e-06	5.23353e-136	7.23599e-135
SLC2A4	4.82e-06	1.06791	4.82e-06	1.98818	4.82e-06	8.10621	5.40635e-76	2.24368e-75
SLC37A4	4.82e-06	0.0345112	4.82e-06	4.82e-06	4.82e-06	4.82e-06	8.52066e-26	1.93928e-25
SLC44A1	0.0440265	0.043945	4.82e-06	0.33723	4.82e-06	4.82e-06	5.29998e-85	2.54232e-84
SLC4A4	0.781527	0.719659	1.27432	1.02777	1.24697	2.55041	6.68235e-56	2.23509e-55
SLC5A2	4.82e-06	4.82e-06	4.82e-06	0.433447	4.82e-06	4.82e-06	3.13621e-104	2.04249e-103
SLMAP	4.82e-06	0.0317065	0.246911	0.0937366	4.82e-06	4.82e-06	8.03962e-169	3.40761e-167
SMAP2	4.82e-06	0.0684392	4.82e-06	4.82e-06	4.82e-06	0.241314	1.77559e-69	6.81978e-69
SMARCAD1	4.82e-06	4.82e-06	4.82e-06	0.245374	4.82e-06	4.82e-06	3.13621e-104	2.04249e-103
SMARCD1	4.82e-06	0.0260947	4.82e-06	4.82e-06	4.82e-06	4.82e-06	8.52066e-26	1.93928e-25
SMARCD2	0.0455218	0.0662754	4.82e-06	4.82e-06	4.82e-06	4.82e-06	7.04808e-33	1.81864e-32
SMIM1	0.0387263	4.82e-06	4.82e-06	4.82e-06	4.82e-06	4.82e-06	2.41365e-47	7.2733e-47
SMPD4	4.82e-06	0.0257179	4.82e-06	0.232491	4.82e-06	4.82e-06	7.46617e-79	3.25253e-78
SNAPIN	4.82e-06	0.249339	4.82e-06	4.82e-06	0.395449	4.82e-06	5.06066e-165	1.76815e-163
SNRPA	4.82e-06	1.32757	4.82e-06	0.580596	4.82e-06	4.82e-06	7.3716e-195	7.47422e-193
SNRPA1	1.2888	1.18055	5.00522	1.18653	1.77356	4.82e-06	5.73562e-125	5.96759e-124
SNRPB2	4.82e-06	0.0271247	4.82e-06	4.82e-06	4.82e-06	4.82e-06	8.52066e-26	1.93928e-25
SNRPC	4.82e-06	0.0920029	4.82e-06	1.35822	4.82e-06	4.82e-06	6.19288e-82	2.81154e-81
SNRPD2	0.263982	4.82e-06	4.82e-06	4.82e-06	4.82e-06	4.82e-06	3.86899e-42	1.08085e-41
SNTB1	0.142551	0.143646	4.82e-06	0.0292641	4.82e-06	0.491913	4.8995e-144	8.58824e-143
SNW1	0.069409	4.82e-06	4.82e-06	4.82e-06	4.82e-06	4.82e-06	3.86899e-42	1.08085e-41
SNX18	4.82e-06	0.093461	4.82e-06	0.777895	4.82e-06	4.82e-06	2.5137e-72	9.99873e-72
SNX27	0.391808	4.82e-06	4.82e-06	4.82e-06	4.82e-06	4.82e-06	2.92594e-114	2.44823e-113
SNX3	4.82e-06	0.104924	4.82e-06	4.82e-06	4.82e-06	4.82e-06	1.84103e-09	3.37109e-09
SNX5	0.50063	0.0296426	1.26046	0.276634	4.82e-06	0.201121	1.60429e-103	1.03438e-102
SNX6	0.0741059	0.011421	4.82e-06	4.82e-06	4.82e-06	4.82e-06	7.86417e-70	3.03249e-69
SOGA1	4.82e-06	0.0578334	4.82e-06	4.82e-06	4.82e-06	4.82e-06	8.52066e-26	1.93928e-25
SOGA3	4.82e-06	0.112381	4.82e-06	4.82e-06	4.82e-06	4.82e-06	8.52066e-26	1.93928e-25
SORD	4.82e-06	0.114321	4.82e-06	4.82e-06	4.82e-06	4.82e-06	5.35817e-19	1.12722e-18
SORT1	0.235871	0.364503	0.795593	0.183815	4.82e-06	0.280586	1.18747e-99	7.26673e-99
SOWAHC	4.82e-06	0.0128458	4.82e-06	4.82e-06	4.82e-06	4.82e-06	3.04642e-15	6.0172e-15
SPAG5	4.82e-06	0.21289	4.82e-06	4.82e-06	4.82e-06	4.82e-06	8.52066e-26	1.93928e-25
SPART	4.82e-06	0.0136933	4.82e-06	0.150372	4.82e-06	4.82e-06	4.1475e-39	1.13535e-38
SPATS2L	0.220707	0.0609217	4.82e-06	4.82e-06	4.82e-06	4.82e-06	1.9362e-76	8.10697e-76
SPCS2	0.139223	0.175612	4.82e-06	5.60806	0.646423	4.82e-06	7.43465e-143	1.25636e-141
SPCS3	0.411967	4.82e-06	4.82e-06	4.82e-06	4.82e-06	4.82e-06	3.86899e-42	1.08085e-41
SPECC1L	4.82e-06	4.82e-06	1.11495	4.82e-06	4.82e-06	4.82e-06	9.15363e-220	9.46669e-217
SPI1	4.82e-06	0.162857	4.82e-06	4.82e-06	5.21034	1.63823	1.11162e-160	3.40131e-159
SPN	0.503895	0.1881	1.7495	0.298725	0.684076	0.375652	5.1618e-81	2.32102e-80
SPON2	4.82e-06	0.0940876	4.82e-06	4.82e-06	4.82e-06	4.82e-06	8.52066e-26	1.93928e-25
SPTLC2	4.82e-06	0.13462	4.82e-06	4.82e-06	4.82e-06	4.82e-06	5.35817e-19	1.12722e-18
SRBD1	4.82e-06	0.0327504	4.82e-06	4.82e-06	4.82e-06	4.82e-06	8.52066e-26	1.93928e-25
SREK1	4.82e-06	0.0373944	4.82e-06	4.82e-06	4.82e-06	4.82e-06	8.52066e-26	1.93928e-25
SRGAP2	4.82e-06	0.039714	4.82e-06	4.82e-06	4.82e-06	4.82e-06	8.52066e-26	1.93928e-25
SRGAP2B	4.82e-06	0.0246673	4.82e-06	4.82e-06	4.82e-06	4.82e-06	8.52066e-26	1.93928e-25
SRGAP2C	4.82e-06	0.0352469	4.82e-06	4.82e-06	4.82e-06	4.82e-06	8.52066e-26	1.93928e-25
SRM	4.82e-06	0.0434536	4.82e-06	0.241227	4.82e-06	4.82e-06	1.41862e-78	6.13867e-78
SRPRA	0.0957209	0.0316375	0.213002	0.0436876	4.82e-06	4.82e-06	2.02704e-131	2.50162e-130
SRR	4.82e-06	4.82e-06	4.82e-06	0.229291	4.82e-06	4.82e-06	3.13621e-104	2.04249e-103
SRRM1	4.82e-06	0.0196742	4.82e-06	0.0673029	4.82e-06	4.82e-06	7.80094e-39	2.12757e-38
SRRT	0.270351	0.0365534	0.645462	0.155794	0.159744	0.225378	1.38196e-51	4.37875e-51
SRSF12	4.82e-06	0.0121374	4.82e-06	0.120685	4.82e-06	4.82e-06	2.26689e-30	5.69585e-30
SRSF8	0.505057	0.19445	4.82e-06	0.183936	0.1213	0.100727	1.56424e-75	6.45546e-75
SSC5D	0.251769	0.535559	4.82e-06	0.120028	0.154646	0.0841022	1.47295e-93	8.1028e-93
SSU72	4.82e-06	0.0361172	4.82e-06	4.82e-06	4.82e-06	4.82e-06	8.52066e-26	1.93928e-25
ST14	4.82e-06	0.204057	4.82e-06	4.82e-06	4.82e-06	4.82e-06	8.52066e-26	1.93928e-25
ST6GAL1	0.26637	0.0415393	1.96715	0.538732	4.82e-06	4.82e-06	1.48531e-130	1.7779e-129
STAG2	4.82e-06	0.0206871	4.82e-06	0.438197	4.82e-06	4.82e-06	1.19919e-124	1.23526e-123
STAMBPL1	0.654579	0.0909325	4.82e-06	4.82e-06	1.97259	4.82e-06	1.8889e-174	9.48299e-173
STARD10	0.31161	4.82e-06	4.82e-06	4.82e-06	4.82e-06	4.82e-06	2.92594e-114	2.44823e-113
STAT5A	0.0862606	4.82e-06	4.82e-06	4.82e-06	4.82e-06	4.82e-06	2.19076e-64	7.94977e-64
STK10	4.82e-06	0.134971	4.82e-06	0.452771	4.82e-06	4.82e-06	8.357e-44	2.42912e-43
STK25	4.82e-06	0.0194857	4.82e-06	4.82e-06	4.82e-06	4.82e-06	8.52066e-26	1.93928e-25
STK3	0.121755	0.174565	0.412168	4.82e-06	0.162152	0.114612	6.87487e-80	3.0515e-79
STRBP	0.266048	0.162619	4.82e-06	0.069681	4.82e-06	0.910746	4.45848e-110	3.5252e-109
STRIP1	4.82e-06	4.82e-06	4.82e-06	4.82e-06	4.82e-06	0.204398	1.00689e-89	5.11455e-89
STRN3	0.092616	0.0066236	0.19526	4.82e-06	4.82e-06	4.82e-06	1.23354e-147	2.38901e-146
STUB1	0.283467	0.042196	4.82e-06	4.82e-06	4.82e-06	4.82e-06	2.19076e-64	7.94977e-64
STX12	0.565892	1.54152	4.82e-06	4.82e-06	4.82e-06	4.82e-06	2.31673e-135	3.13607e-134
STX16	4.82e-06	4.82e-06	4.82e-06	4.82e-06	4.82e-06	2.65484	1.92009e-97	1.10689e-96
STX18	0.137663	4.82e-06	4.82e-06	4.82e-06	4.82e-06	4.82e-06	2.41365e-47	7.2733e-47
STX1A	0.491866	2.13235	4.82e-06	0.879518	4.82e-06	1.08691	1.4274e-101	8.94679e-101
SUGCT	4.82e-06	0.414244	4.82e-06	1.13241	4.82e-06	4.82e-06	1.06003e-38	2.88343e-38
SUPT3H	4.82e-06	0.117471	4.82e-06	4.82e-06	4.82e-06	4.82e-06	8.52066e-26	1.93928e-25
SVEP1	4.82e-06	0.0363647	4.82e-06	4.82e-06	4.82e-06	4.82e-06	5.35817e-19	1.12722e-18
SYBU	4.82e-06	4.82e-06	4.82e-06	4.82e-06	4.82e-06	0.644652	1.92009e-97	1.10689e-96
SYNJ1	4.82e-06	4.82e-06	4.82e-06	0.0305596	4.82e-06	4.82e-06	3.13621e-104	2.04249e-103
SYNJ2BP	4.82e-06	0.436648	4.82e-06	4.82e-06	4.82e-06	4.82e-06	8.52066e-26	1.93928e-25
SYNPO	0.214226	0.0647104	4.82e-06	4.82e-06	4.82e-06	4.82e-06	4.73182e-39	1.29393e-38
SYTL4	4.82e-06	0.0485817	4.82e-06	4.82e-06	4.82e-06	4.82e-06	8.52066e-26	1.93928e-25
SZT2	4.82e-06	0.0600507	4.82e-06	4.82e-06	4.82e-06	4.82e-06	8.52066e-26	1.93928e-25
TACC1	0.3358	0.0412697	4.82e-06	4.82e-06	4.82e-06	4.82e-06	5.26168e-38	1.42153e-37
TANC1	4.82e-06	0.0309616	4.82e-06	4.82e-06	4.82e-06	4.82e-06	5.35817e-19	1.12722e-18
TAOK2	0.641822	0.2512	4.82e-06	4.82e-06	4.82e-06	4.82e-06	1.23206e-87	6.09079e-87
TARS3	0.342298	0.0218006	4.82e-06	4.82e-06	4.82e-06	4.82e-06	5.21517e-82	2.37391e-81
TATDN1	4.82e-06	4.82e-06	4.82e-06	4.82e-06	4.82e-06	0.896357	1.92009e-97	1.10689e-96
TBC1D15	4.82e-06	4.82e-06	4.82e-06	0.040285	4.82e-06	4.82e-06	3.13621e-104	2.04249e-103
TBC1D20	2.54982	0.660269	2.67221	6.52179	4.82e-06	4.82e-06	1.06943e-166	4.18943e-165
TBC1D24	4.82e-06	0.0558552	4.82e-06	4.82e-06	4.82e-06	4.82e-06	6.83919e-30	1.69863e-29
TBC1D4	4.82e-06	0.00929638	4.82e-06	4.82e-06	4.82e-06	4.82e-06	3.04642e-15	6.0172e-15
TBC1D9B	4.82e-06	0.0044242	4.82e-06	0.0328785	4.82e-06	4.82e-06	2.32332e-32	5.95337e-32
TBCC	4.82e-06	4.82e-06	4.82e-06	0.183787	4.82e-06	4.82e-06	1.93461e-45	5.67113e-45
TBCE	0.0422189	0.123527	4.82e-06	4.82e-06	4.82e-06	4.82e-06	7.26744e-54	2.34435e-53
TBL1X	0.416884	0.465115	1.81974	0.823324	4.82e-06	4.82e-06	6.52121e-127	7.17472e-126
TBL1XR1	1.89787	2.4137	2.96505	1.3597	6.17787	2.60458	1.78354e-19	3.86533e-19
TBL1Y	0.350585	0.273776	1.99594	0.63415	4.82e-06	4.82e-06	9.0797e-144	1.57027e-142
TBL2	0.363452	0.22793	4.82e-06	1.95516	4.82e-06	4.82e-06	5.06307e-103	3.23623e-102
TCAF1	0.196719	0.308056	4.82e-06	4.82e-06	4.82e-06	0.151394	8.0304e-77	3.39258e-76
TCEA2	0.269803	0.396152	4.82e-06	0.194643	4.82e-06	4.82e-06	4.35432e-126	4.71051e-125
TCF25	4.82e-06	4.82e-06	4.82e-06	4.82e-06	4.82e-06	0.149027	1.00689e-89	5.11455e-89
TCIRG1	0.207712	0.204953	0.239081	0.668519	0.12776	0.25958	7.48281e-10	1.40858e-09
TCL1A	1.07078	4.82e-06	4.82e-06	4.82e-06	4.82e-06	4.82e-06	3.86899e-42	1.08085e-41
TCN1	4.82e-06	0.259575	0.938756	4.82e-06	4.82e-06	4.82e-06	7.59458e-152	1.72244e-150
TDRD7	4.82e-06	4.82e-06	4.82e-06	1.94461	4.82e-06	4.82e-06	3.13621e-104	2.04249e-103
TFAM	4.82e-06	0.0987617	4.82e-06	4.82e-06	4.82e-06	4.82e-06	8.52066e-26	1.93928e-25
TFPI	0.162219	0.499097	0.187345	0.0874187	4.82e-06	0.0344972	1.41459e-129	1.64749e-128
TGFBR3	4.82e-06	0.00739992	4.82e-06	4.82e-06	4.82e-06	4.82e-06	5.35817e-19	1.12722e-18
THOC1	4.82e-06	0.0129662	4.82e-06	4.82e-06	4.82e-06	4.82e-06	1.84103e-09	3.37109e-09
THOC3	0.0506444	0.011552	4.82e-06	4.82e-06	4.82e-06	4.82e-06	1.14914e-53	3.6908e-53
THOC7	4.82e-06	0.0293667	4.82e-06	4.82e-06	4.82e-06	4.82e-06	1.84103e-09	3.37109e-09
THSD4	4.82e-06	0.00376512	4.82e-06	4.82e-06	4.82e-06	4.82e-06	3.04642e-15	6.0172e-15
THUMPD3	0.194745	0.0136645	4.82e-06	4.82e-06	4.82e-06	4.82e-06	3.45408e-54	1.11701e-53
TIA1	0.470933	0.22284	4.82e-06	0.143189	4.82e-06	4.82e-06	4.69907e-161	1.46379e-159
TIGAR	0.768679	0.0172011	4.82e-06	0.0830681	4.82e-06	4.82e-06	1.58428e-64	5.77331e-64
TJP3	0.0551989	0.0141973	4.82e-06	0.111947	4.82e-06	0.391271	3.6275e-71	1.4232e-70
TK2	0.806736	0.329315	0.314988	0.379879	0.435707	0.391065	1.40857e-67	5.30109e-67
TLE1	0.281752	0.602558	4.82e-06	0.357747	4.82e-06	4.82e-06	1.51105e-117	1.35653e-116
TLE4	0.270815	0.598519	4.82e-06	0.356232	4.82e-06	4.82e-06	6.33668e-118	5.7587e-117
TLNRD1	4.82e-06	0.0441326	4.82e-06	4.82e-06	4.82e-06	4.82e-06	1.84103e-09	3.37109e-09
TMC5	4.82e-06	0.0575959	4.82e-06	4.82e-06	4.82e-06	11.3037	1.00786e-192	8.98556e-191
TMED9	0.376708	0.152643	4.82e-06	4.82e-06	4.82e-06	4.82e-06	1.51905e-56	5.11061e-56
TMEM201	4.82e-06	4.82e-06	4.82e-06	4.82e-06	4.82e-06	0.164648	1.92009e-97	1.10689e-96
TMEM222	4.82e-06	0.00900587	4.82e-06	4.82e-06	4.82e-06	4.82e-06	3.04642e-15	6.0172e-15
TMEM97	4.82e-06	0.0468142	4.82e-06	0.546226	4.82e-06	4.82e-06	5.97215e-33	1.54179e-32
TMLHE	4.82e-06	4.82e-06	4.82e-06	0.203143	4.82e-06	4.82e-06	3.13621e-104	2.04249e-103
TMOD1	4.82e-06	0.177876	4.82e-06	4.82e-06	4.82e-06	4.82e-06	8.52066e-26	1.93928e-25
TMOD3	0.384956	0.430474	0.507441	0.387303	0.467336	2.73735	6.00264e-52	1.90427e-51
TMTC3	4.82e-06	4.82e-06	4.82e-06	0.257552	4.82e-06	4.82e-06	1.26783e-54	4.11805e-54
TNNC2	4.82e-06	0.0245451	4.82e-06	4.82e-06	4.82e-06	4.82e-06	8.52066e-26	1.93928e-25
TNPO2	0.055622	0.0243569	4.82e-06	4.82e-06	0.646215	0.071736	3.12802e-135	4.19041e-134
TOLLIP	0.611778	0.208232	4.82e-06	0.36647	1.13543	0.187726	1.15112e-98	6.9457e-98
TOMM20	5.67266	9.88887	9.03376	21.8716	4.17023	7.85431	8.8643e-38	2.38736e-37
TOMM22	4.82e-06	0.162931	4.82e-06	4.82e-06	4.82e-06	4.82e-06	8.52066e-26	1.93928e-25
TOMM34	1.61937	0.369274	1.1446	4.82e-06	3.13044	0.773173	9.75301e-94	5.38237e-93
TOMM40	4.82e-06	0.0206253	4.82e-06	4.82e-06	4.82e-06	0.248589	8.10413e-77	3.42094e-76
TOR1B	4.82e-06	4.82e-06	4.82e-06	4.82e-06	4.82e-06	0.767914	1.92009e-97	1.10689e-96
TOX2	4.82e-06	4.82e-06	4.82e-06	4.82e-06	4.82e-06	0.160742	1.00689e-89	5.11455e-89
TOX3	4.82e-06	4.82e-06	4.82e-06	4.82e-06	4.82e-06	0.110696	1.00689e-89	5.11455e-89
TOX4	4.82e-06	4.82e-06	4.82e-06	4.82e-06	4.82e-06	0.119912	1.00689e-89	5.11455e-89
TPPP	4.82e-06	0.0229759	4.82e-06	4.82e-06	4.82e-06	4.82e-06	8.52066e-26	1.93928e-25
TRAPPC13	4.82e-06	0.0138961	4.82e-06	4.82e-06	4.82e-06	4.82e-06	3.04642e-15	6.0172e-15
TRAPPC4	0.385546	11.5875	10.395	0.330773	4.82e-06	30.1623	5.14182e-84	2.42153e-83
TRAPPC6B	0.478973	0.340127	1.12551	0.321543	4.82e-06	0.529111	1.9632e-76	8.2067e-76
TRAPPC8	0.155685	0.0233034	4.82e-06	4.82e-06	0.335827	4.82e-06	1.7544e-194	1.74461e-192
TRAPPC9	4.82e-06	0.0227217	4.82e-06	4.82e-06	4.82e-06	4.82e-06	1.84103e-09	3.37109e-09
TREH	4.82e-06	4.82e-06	4.82e-06	4.82e-06	4.82e-06	0.362666	1.00689e-89	5.11455e-89
TRHDE	4.82e-06	0.00682952	4.82e-06	4.82e-06	4.82e-06	4.82e-06	3.04642e-15	6.0172e-15
TRIM22	0.179011	4.82e-06	4.82e-06	4.82e-06	4.82e-06	4.82e-06	1.30969e-95	7.43401e-95
TRIM26	4.82e-06	0.018364	4.82e-06	4.82e-06	4.82e-06	4.82e-06	5.35817e-19	1.12722e-18
TRIM29	4.82e-06	4.82e-06	4.82e-06	0.0454579	4.82e-06	4.82e-06	1.26783e-54	4.11805e-54
TRIM65	4.82e-06	0.0772377	4.82e-06	4.82e-06	4.82e-06	4.82e-06	1.84103e-09	3.37109e-09
TRIP6	0.127925	4.82e-06	4.82e-06	0.225098	4.82e-06	0.821758	3.0515e-69	1.16797e-68
TRIR	0.194523	0.435399	1.63595	4.82e-06	4.82e-06	0.539537	2.64447e-151	5.86892e-150
TRMT1L	0.308444	0.593922	4.82e-06	4.82e-06	4.82e-06	4.82e-06	6.96613e-55	2.30172e-54
TRMT2A	0.0561725	0.0099329	4.82e-06	4.82e-06	4.82e-06	4.82e-06	3.51834e-33	9.10121e-33
TRMT61A	4.82e-06	0.0288214	4.82e-06	4.82e-06	4.82e-06	4.82e-06	5.35817e-19	1.12722e-18
TRNT1	4.82e-06	0.0461235	4.82e-06	4.82e-06	4.82e-06	4.82e-06	5.35817e-19	1.12722e-18
TSTD1	4.82e-06	0.0149933	4.82e-06	0.146553	4.82e-06	4.82e-06	6.30888e-38	1.70267e-37
TTC37	0.231817	0.0651835	0.215437	0.215058	0.261635	0.774672	3.18844e-65	1.16932e-64
TTC5	4.82e-06	4.82e-06	4.82e-06	4.82e-06	0.655624	4.82e-06	1.5633e-216	4.49102e-214
TTC9C	4.82e-06	0.0915019	4.82e-06	4.82e-06	4.82e-06	4.82e-06	1.84103e-09	3.37109e-09
TTI1	4.82e-06	0.0079462	4.82e-06	4.82e-06	4.82e-06	4.82e-06	1.84103e-09	3.37109e-09
TUBG1	4.82e-06	0.11728	4.82e-06	0.184039	4.82e-06	4.82e-06	9e-31	2.26798e-30
TUBG2	4.82e-06	0.0264695	4.82e-06	0.0658333	4.82e-06	4.82e-06	2.1361e-27	5.19313e-27
TUT1	4.82e-06	0.0820256	4.82e-06	0.287654	4.82e-06	4.82e-06	7.1596e-82	3.24757e-81
TXLNA	4.82e-06	0.212189	4.82e-06	0.428984	4.82e-06	0.131822	1.66013e-54	5.38553e-54
U2AF2	1.48758	0.456689	0.607175	4.82e-06	4.82e-06	0.319925	2.97414e-135	3.99462e-134
UBAC2	4.82e-06	4.82e-06	4.82e-06	4.82e-06	1.9834	4.82e-06	1.5633e-216	4.49102e-214
UBASH3B	4.82e-06	0.106147	4.82e-06	4.82e-06	4.82e-06	4.82e-06	5.35817e-19	1.12722e-18
UBE2A	0.549239	4.82e-06	2.506	4.82e-06	4.82e-06	0.939634	5.10204e-120	4.81435e-119
UBE2M	0.85164	4.82e-06	4.82e-06	0.248637	4.82e-06	4.82e-06	8.11157e-108	6.17745e-107
UBE2O	4.82e-06	0.124457	4.82e-06	4.82e-06	4.82e-06	0.0331471	2.47644e-77	1.05483e-76
UBE2Q1	4.82e-06	0.199992	4.82e-06	4.82e-06	4.82e-06	4.82e-06	5.35817e-19	1.12722e-18
UBE4B	4.82e-06	0.00463943	4.82e-06	4.82e-06	4.82e-06	4.82e-06	1.84103e-09	3.37109e-09
UBFD1	4.82e-06	4.82e-06	4.82e-06	4.82e-06	4.82e-06	0.152404	1.92009e-97	1.10689e-96
UBQLN1	0.855974	0.361727	0.372295	0.116605	0.373844	1.58854	2.79407e-31	7.07547e-31
UBQLN2	0.705372	0.25479	0.301488	0.144763	0.249349	0.114246	7.1169e-64	2.56456e-63
UBQLN4	0.0416851	4.82e-06	4.82e-06	0.143178	4.82e-06	4.82e-06	5.15064e-38	1.393e-37
UBR5	0.154306	0.0279416	0.602535	0.114024	0.225473	0.142904	7.33456e-58	2.49192e-57
UCHL1	0.271162	4.82e-06	4.82e-06	0.468504	4.82e-06	4.82e-06	3.40672e-102	2.15884e-101
UCHL3	3.8298	4.12764	0.858072	1.19884	10.0745	3.70614	4.42393e-14	8.60652e-14
UCHL5	4.82e-06	0.0883256	4.82e-06	4.82e-06	4.82e-06	4.82e-06	3.04642e-15	6.0172e-15
UEVLD	4.82e-06	4.82e-06	0.275992	0.960079	4.82e-06	4.82e-06	7.99973e-190	6.56613e-188
UFD1	4.82e-06	0.228771	4.82e-06	4.82e-06	4.82e-06	4.82e-06	7.23956e-43	2.06599e-42
UGGT2	4.82e-06	0.0149236	4.82e-06	4.82e-06	4.82e-06	0.176491	8.19444e-87	4.00884e-86
UGT1A10	0.134333	0.0263023	4.82e-06	4.82e-06	4.82e-06	4.82e-06	9.69495e-47	2.90287e-46
UGT1A6	0.488945	1.16669	2.30802	0.206392	0.112352	4.82e-06	1.02469e-126	1.12498e-125
UGT1A7	0.666017	0.032024	4.82e-06	4.82e-06	4.82e-06	4.82e-06	5.95599e-108	4.54925e-107
UGT1A8	0.0992353	0.0358597	4.82e-06	4.82e-06	4.82e-06	4.82e-06	3.77305e-107	2.82351e-106
UGT1A9	0.110803	0.0316847	4.82e-06	4.82e-06	4.82e-06	4.82e-06	2.58313e-107	1.94148e-106
UMPS	0.68532	0.262579	0.895412	2.11261	0.544275	0.311895	1.26648e-71	4.99158e-71
UPF2	0.0282294	4.82e-06	4.82e-06	4.82e-06	4.82e-06	4.82e-06	3.86899e-42	1.08085e-41
UROD	0.662055	0.636875	1.88465	0.704196	0.858369	0.285253	7.5836e-48	2.32178e-47
USF1	0.602692	4.82e-06	4.82e-06	4.82e-06	4.82e-06	4.82e-06	3.86899e-42	1.08085e-41
USP12	4.82e-06	0.0133165	4.82e-06	4.82e-06	4.82e-06	4.82e-06	1.84103e-09	3.37109e-09
USP46	4.82e-06	0.0133165	4.82e-06	4.82e-06	4.82e-06	4.82e-06	1.84103e-09	3.37109e-09
UTP25	4.82e-06	4.82e-06	4.82e-06	4.82e-06	0.584392	4.82e-06	1.5633e-216	4.49102e-214
VAMP2	0.206401	0.0198079	4.82e-06	4.82e-06	4.82e-06	4.82e-06	8.15035e-37	2.17919e-36
VAMP3	4.82e-06	0.0364891	4.82e-06	4.82e-06	4.82e-06	4.82e-06	8.52066e-26	1.93928e-25
VAPB	4.82e-06	0.279575	4.82e-06	1.05893	4.82e-06	4.82e-06	1.0568e-107	8.00108e-107
VAV2	0.0261319	4.82e-06	4.82e-06	4.82e-06	4.82e-06	0.175246	6.13611e-68	2.32623e-67
VBP1	4.82e-06	0.0158192	4.82e-06	4.82e-06	4.82e-06	4.82e-06	1.84103e-09	3.37109e-09
VCPIP1	4.82e-06	0.00278518	4.82e-06	4.82e-06	4.82e-06	0.182142	9.79494e-89	4.93661e-88
VPS26B	0.642489	0.368615	0.535027	1.59474	0.17827	0.0854477	3.35079e-36	8.89017e-36
VPS35L	0.144796	0.131045	4.82e-06	0.378472	0.137058	4.82e-06	1.88803e-130	2.24954e-129
VPS52	0.228795	0.226584	0.769815	0.167567	0.17544	0.117616	1.68233e-17	3.47418e-17
VPS53	0.0702698	0.366001	4.82e-06	0.127924	4.82e-06	4.82e-06	7.02997e-149	1.42557e-147
VPS72	4.82e-06	4.82e-06	4.82e-06	3.51277	4.82e-06	4.82e-06	3.50697e-166	1.32369e-164
VRK1	4.82e-06	0.0147316	4.82e-06	0.21028	4.82e-06	4.82e-06	3.5628e-83	1.64788e-82
VSIG1	1.47493	4.82e-06	4.82e-06	5.21017	4.82e-06	4.82e-06	2.15084e-68	8.17792e-68
VSNL1	0.174615	1.24525	4.82e-06	4.82e-06	0.303105	4.82e-06	6.66394e-153	1.57892e-151
VTA1	4.82e-06	4.82e-06	4.82e-06	4.82e-06	0.310724	4.82e-06	1.5633e-216	4.49102e-214
VTI1B	1.23925	0.853348	1.08302	3.18863	0.65346	1.5076	4.99891e-52	1.58682e-51
VWA1	0.253109	0.35388	0.862754	0.215046	4.82e-06	0.233538	6.79097e-92	3.68479e-91
VWA5A	0.302919	0.286285	0.768605	0.259511	0.208429	4.82e-06	2.54409e-115	2.17087e-114
WAPL	0.166073	4.82e-06	4.82e-06	4.82e-06	4.82e-06	4.82e-06	3.86899e-42	1.08085e-41
WASH2P	0.134354	0.253481	4.82e-06	0.0746981	4.82e-06	0.134397	1.47779e-91	7.96006e-91
WASH3P	0.134354	0.253481	4.82e-06	0.0746981	4.82e-06	0.134397	1.47779e-91	7.96006e-91
WDR11	0.04945	0.151381	4.82e-06	4.82e-06	4.82e-06	4.82e-06	1.06745e-118	9.82165e-118
WDR3	0.0636257	4.82e-06	4.82e-06	4.82e-06	0.932977	4.82e-06	2.60769e-187	2.01259e-185
WDR37	4.82e-06	0.0749777	4.82e-06	0.335624	4.82e-06	4.82e-06	9.0451e-30	2.2422e-29
WDR75	0.273879	0.0777779	4.82e-06	4.82e-06	4.82e-06	4.82e-06	5.87829e-36	1.55481e-35
WDR91	4.82e-06	0.012789	4.82e-06	4.82e-06	4.82e-06	4.82e-06	1.84103e-09	3.37109e-09
WFIKKN2	0.320841	4.82e-06	4.82e-06	4.82e-06	4.82e-06	4.82e-06	3.86899e-42	1.08085e-41
WIPI2	4.82e-06	0.125133	4.82e-06	4.82e-06	4.82e-06	4.82e-06	8.52066e-26	1.93928e-25
WWC2	4.82e-06	0.0697798	4.82e-06	0.453871	4.82e-06	4.82e-06	6.99664e-40	1.92855e-39
XPNPEP3	4.82e-06	4.82e-06	4.82e-06	4.82e-06	0.337506	4.82e-06	1.5633e-216	4.49102e-214
XPO4	0.166702	4.82e-06	4.82e-06	4.82e-06	4.82e-06	4.82e-06	2.19076e-64	7.94977e-64
XPO6	4.82e-06	0.0058338	4.82e-06	4.82e-06	4.82e-06	4.82e-06	1.84103e-09	3.37109e-09
XRN1	4.82e-06	0.0243063	4.82e-06	4.82e-06	4.82e-06	4.82e-06	8.52066e-26	1.93928e-25
YIPF3	4.82e-06	0.0320104	4.82e-06	4.82e-06	4.82e-06	4.82e-06	5.35817e-19	1.12722e-18
YLPM1	4.82e-06	4.82e-06	4.82e-06	0.110376	4.82e-06	4.82e-06	3.13621e-104	2.04249e-103
YTHDC2	4.82e-06	0.0275428	4.82e-06	4.82e-06	0.174331	4.82e-06	5.57872e-195	5.76951e-193
YTHDF3	1.93113	0.57669	4.82e-06	0.213188	4.82e-06	0.262994	8.2697e-119	7.62257e-118
ZC3H14	0.439397	0.315262	1.2029	0.353076	4.82e-06	4.82e-06	1.71053e-161	5.39337e-160
ZC3H15	4.82e-06	0.00996422	4.82e-06	4.82e-06	4.82e-06	4.82e-06	3.04642e-15	6.0172e-15
ZC3H4	4.82e-06	4.82e-06	4.82e-06	0.0930008	4.82e-06	4.82e-06	3.13621e-104	2.04249e-103
ZC3H7B	4.82e-06	0.0332579	4.82e-06	4.82e-06	4.82e-06	4.82e-06	5.35817e-19	1.12722e-18
ZC3HAV1L	4.82e-06	4.82e-06	4.82e-06	1.42846	4.82e-06	4.82e-06	3.13621e-104	2.04249e-103
ZC3HC1	4.82e-06	0.0247491	4.82e-06	4.82e-06	4.82e-06	4.82e-06	8.52066e-26	1.93928e-25
ZFP36L1	0.272521	4.82e-06	4.82e-06	4.82e-06	4.82e-06	4.82e-06	3.86899e-42	1.08085e-41
ZFR	0.0604389	0.190425	4.82e-06	4.82e-06	4.82e-06	4.82e-06	8.85889e-50	2.74143e-49
ZMIZ1	4.82e-06	0.0798988	4.82e-06	4.82e-06	4.82e-06	4.82e-06	8.52066e-26	1.93928e-25
ZMPSTE24	4.82e-06	0.01724	4.82e-06	0.56297	4.82e-06	4.82e-06	1.03295e-84	4.92745e-84
ZMYND8	4.82e-06	0.0136162	4.82e-06	4.82e-06	4.82e-06	4.82e-06	1.84103e-09	3.37109e-09
ZNF512	4.82e-06	4.82e-06	4.82e-06	0.195109	4.82e-06	4.82e-06	3.13621e-104	2.04249e-103
ZNF638	4.82e-06	0.00568152	4.82e-06	4.82e-06	4.82e-06	4.82e-06	3.04642e-15	6.0172e-15
ZRANB2	4.82e-06	0.0112049	4.82e-06	4.82e-06	4.82e-06	4.82e-06	3.04642e-15	6.0172e-15
ZW10	0.282492	0.308216	0.28116	0.137231	0.41289	1.09632	5.42987e-84	2.55486e-83

## Sheet: clusters
Symbol	Cluster1	Cluster2	Cluster3	Cluster4
AAGAB	1	0	0	0
ABCB8	1	0	0	0
ABCC1	1	0	0	0
ABCF3	1	0	0	0
ACOT2	1	0	0	0
ACOT8	1	0	0	0
ACSF3	1	0	0	0
ADGRL2	1	0	0	0
AHCTF1	1	0	0	0
AIFM2	1	0	0	0
ALOX5AP	1	0	0	0
AMPD2	1	0	0	0
AMPH	1	0	0	0
ARHGAP26	1	0	0	0
ARHGAP5	1	0	0	0
ATP13A2	1	0	0	0
ATP6V1C1	1	0	0	0
BAALC	1	0	0	0
BAG6	1	0	0	0
BAZ1B	1	0	0	0
BLOC1S4	1	0	0	0
BMP1	1	0	0	0
BTF3	1	0	0	0
C1orf116	1	0	0	0
C2CD2L	1	0	0	0
C7orf26	1	0	0	0
CAMK1	1	0	0	0
CAP2	1	0	0	0
CASP6	1	0	0	0
CAV1	1	0	0	0
CBFB	1	0	0	0
CCDC51	1	0	0	0
CCDC97	1	0	0	0
CCT7	1	0	0	0
CD84	1	0	0	0
CDC23	1	0	0	0
CDC42EP1	1	0	0	0
CDH11	1	0	0	0
CDK14	1	0	0	0
CDKAL1	1	0	0	0
CES2	1	0	0	0
CHD5	1	0	0	0
CHI3L2	1	0	0	0
CHKB	1	0	0	0
CNPY3	1	0	0	0
COG6	1	0	0	0
COL15A1	1	0	0	0
COL6A5	1	0	0	0
COMMD4	1	0	0	0
CPNE8	1	0	0	0
CPSF2	1	0	0	0
CRABP2	1	0	0	0
CSF1	1	0	0	0
CSRP2	1	0	0	0
CTRB1	1	0	0	0
CTRB2	1	0	0	0
CTSA	1	0	0	0
CUL1	1	0	0	0
CYP3A5	1	0	0	0
CYRIA	1	0	0	0
DAZAP1	1	0	0	0
DNAJC11	1	0	0	0
DOCK1	1	0	0	0
DPYD	1	0	0	0
EED	1	0	0	0
EIF2D	1	0	0	0
ELAC2	1	0	0	0
ELP1	1	0	0	0
EPB41L2	1	0	0	0
FAM151A	1	0	0	0
FKBP10	1	0	0	0
FOCAD	1	0	0	0
FOLH1	1	0	0	0
FOLH1B	1	0	0	0
FOLR3	1	0	0	0
GALNT3	1	0	0	0
GATD1	1	0	0	0
GBP2	1	0	0	0
GGA2	1	0	0	0
GIMAP7	1	0	0	0
GNL1	1	0	0	0
GNL3	1	0	0	0
GOT2	1	0	0	0
GP2	1	0	0	0
GRAP2	1	0	0	0
HDAC1	1	0	0	0
HNRNPA1L2	1	0	0	0
HOOK3	1	0	0	0
HTT	1	0	0	0
IGBP1	1	0	0	0
IGFBP1	1	0	0	0
ITPRID2	1	0	0	0
KARS1	1	0	0	0
KDM3B	1	0	0	0
KPNA3	1	0	0	0
KRT82	1	0	0	0
KRT87P	1	0	0	0
LDLR	1	0	0	0
LIG4	1	0	0	0
LMAN2L	1	0	0	0
LPP	1	0	0	0
MADD	1	0	0	0
MALT1	1	0	0	0
MAP2K4	1	0	0	0
MFAP4	1	0	0	0
MGST3	1	0	0	0
MICOS13	1	0	0	0
MRPL9	1	0	0	0
MRPS16	1	0	0	0
MRPS7	1	0	0	0
MSH6	1	0	0	0
MTARC1	1	0	0	0
MUC16	1	0	0	0
MYO5B	1	0	0	0
MYOC	1	0	0	0
NACA	1	0	0	0
NCBP3	1	0	0	0
NEDD1	1	0	0	0
NF1	1	0	0	0
NFIC	1	0	0	0
NNMT	1	0	0	0
NOLC1	1	0	0	0
NTAN1	1	0	0	0
NUDC	1	0	0	0
NUDT6	1	0	0	0
OGA	1	0	0	0
OSGEP	1	0	0	0
OXNAD1	1	0	0	0
PABPC1L	1	0	0	0
PAK1	1	0	0	0
PALD1	1	0	0	0
PDHA2	1	0	0	0
PDS5B	1	0	0	0
PDZD11	1	0	0	0
PGAM5	1	0	0	0
PLA2G4A	1	0	0	0
PLCB3	1	0	0	0
PLIN4	1	0	0	0
PPME1	1	0	0	0
PPP2R2B	1	0	0	0
PPP2R5C	1	0	0	0
PPP5C	1	0	0	0
PRG2	1	0	0	0
PRIM2	1	0	0	0
PRNP	1	0	0	0
PSMB9	1	0	0	0
PSME3IP1	1	0	0	0
PTK2	1	0	0	0
PTPRE	1	0	0	0
PTX3	1	0	0	0
RAB31	1	0	0	0
RAB6D	1	0	0	0
RABEP1	1	0	0	0
RAP2C	1	0	0	0
RASAL3	1	0	0	0
RBM10	1	0	0	0
RBM5	1	0	0	0
RCN3	1	0	0	0
RPAP1	1	0	0	0
RPL10	1	0	0	0
RPL11	1	0	0	0
RPS24	1	0	0	0
RPS5	1	0	0	0
RUFY3	1	0	0	0
S100A13	1	0	0	0
SAMD9	1	0	0	0
SCAF1	1	0	0	0
SCFD2	1	0	0	0
SCGN	1	0	0	0
SCRN2	1	0	0	0
SET	1	0	0	0
SFXN3	1	0	0	0
SHTN1	1	0	0	0
SLAIN2	1	0	0	0
SLC12A5	1	0	0	0
SLC25A20	1	0	0	0
SMIM1	1	0	0	0
SNRPD2	1	0	0	0
SNRPE	1	0	0	0
SPCS3	1	0	0	0
SPECC1L	1	0	0	0
SRCIN1	1	0	0	0
STAM2	1	0	0	0
STARD10	1	0	0	0
STAT5A	1	0	0	0
STX18	1	0	0	0
TBC1D2B	1	0	0	0
TCIRG1	1	0	0	0
TGOLN2	1	0	0	0
TMEM43	1	0	0	0
TMTC3	1	0	0	0
TP53I11	1	0	0	0
TRIM25	1	0	0	0
TRIM29	1	0	0	0
TRRAP	1	0	0	0
TTC5	1	0	0	0
UBAC2	1	0	0	0
UGT1A7	1	0	0	0
USP4	1	0	0	0
UTP25	1	0	0	0
VPS11	1	0	0	0
VPS52	1	0	0	0
WAPL	1	0	0	0
WASL	1	0	0	0
WDFY4	1	0	0	0
WDR11	1	0	0	0
WDR3	1	0	0	0
WDR44	1	0	0	0
WFIKKN2	1	0	0	0
XPNPEP3	1	0	0	0
XPO4	1	0	0	0
ZFP36L1	1	0	0	0
ABCB7	0	1	0	0
ABLIM1	0	1	0	0
ADAP1	0	1	0	0
AIP	0	1	0	0
AKT1	0	1	0	0
ALDH3B1	0	1	0	0
AP2S1	0	1	0	0
ASPDH	0	1	0	0
ATG3	0	1	0	0
ATG9A	0	1	0	0
ATL1	0	1	0	0
ATP2B2	0	1	0	0
ATP5ME	0	1	0	0
ATP6V1D	0	1	0	0
BLK	0	1	0	0
BNIP2	0	1	0	0
BRD3	0	1	0	0
BZW2	0	1	0	0
C11orf54	0	1	0	0
CARD8	0	1	0	0
CARHSP1	0	1	0	0
CBX1	0	1	0	0
CCDC6	0	1	0	0
CDKN2C	0	1	0	0
CELA2A	0	1	0	0
CELA2B	0	1	0	0
CELF2	0	1	0	0
CEP350	0	1	0	0
CFAP20	0	1	0	0
CLINT1	0	1	0	0
CLMN	0	1	0	0
COMMD2	0	1	0	0
COMMD9	0	1	0	0
COPS5	0	1	0	0
CPSF4	0	1	0	0
CRTAP	0	1	0	0
CTHRC1	0	1	0	0
CUZD1	0	1	0	0
CYB5R2	0	1	0	0
CYBB	0	1	0	0
DAXX	0	1	0	0
DCLK2	0	1	0	0
DCTN4	0	1	0	0
DENND10	0	1	0	0
DENND10P1	0	1	0	0
DENND2D	0	1	0	0
DENR	0	1	0	0
DHRS11	0	1	0	0
DHTKD1	0	1	0	0
DICER1	0	1	0	0
DMD	0	1	0	0
DNAJA2	0	1	0	0
DNPEP	0	1	0	0
DOCK9	0	1	0	0
DPYS	0	1	0	0
DPYSL3	0	1	0	0
DUT	0	1	0	0
DYNC1LI2	0	1	0	0
EEF1AKNMT	0	1	0	0
EIF3H	0	1	0	0
ELAVL4	0	1	0	0
EPHA1	0	1	0	0
ERBB4	0	1	0	0
ERMP1	0	1	0	0
EXOSC3	0	1	0	0
FBXO22	0	1	0	0
FGFR1OP	0	1	0	0
FGFR2	0	1	0	0
FHIT	0	1	0	0
FMNL2	0	1	0	0
FMNL3	0	1	0	0
FUS	0	1	0	0
GBA2	0	1	0	0
GCDH	0	1	0	0
GCLM	0	1	0	0
GFER	0	1	0	0
GGACT	0	1	0	0
GGCX	0	1	0	0
GLE1	0	1	0	0
GMIP	0	1	0	0
GSK3A	0	1	0	0
GTF3C5	0	1	0	0
GUCY1A2	0	1	0	0
GUCY1B1	0	1	0	0
HEPACAM	0	1	0	0
HGD	0	1	0	0
HIP1R	0	1	0	0
HIRIP3	0	1	0	0
HMGN4	0	1	0	0
HMOX2	0	1	0	0
HSDL1	0	1	0	0
IGKV1-17	0	1	0	0
IGKV2-30	0	1	0	0
IL1R2	0	1	0	0
INTS9	0	1	0	0
IST1	0	1	0	0
KDELR1	0	1	0	0
KHDRBS1	0	1	0	0
KPNA1	0	1	0	0
KPNA5	0	1	0	0
KPNA6	0	1	0	0
LALBA	0	1	0	0
LAMA1	0	1	0	0
LAMTOR1	0	1	0	0
LARP1B	0	1	0	0
LETMD1	0	1	0	0
LGALSL	0	1	0	0
LRSAM1	0	1	0	0
LUC7L2	0	1	0	0
LYPLA2	0	1	0	0
MAK16	0	1	0	0
MAP3K10	0	1	0	0
MAP3K11	0	1	0	0
MAP3K21	0	1	0	0
MAP3K9	0	1	0	0
MAP7	0	1	0	0
MBOAT7	0	1	0	0
MCM3	0	1	0	0
MEF2D	0	1	0	0
MFN2	0	1	0	0
MLLT11	0	1	0	0
MTPAP	0	1	0	0
MVD	0	1	0	0
MYL2	0	1	0	0
MYL3	0	1	0	0
NAA10	0	1	0	0
NAPSA	0	1	0	0
NECAP2	0	1	0	0
NEDD8	0	1	0	0
NFS1	0	1	0	0
NHLRC3	0	1	0	0
NRAS	0	1	0	0
NUDCD2	0	1	0	0
OAS3	0	1	0	0
OGDHL	0	1	0	0
OLFML3	0	1	0	0
ORMDL1	0	1	0	0
PAK2	0	1	0	0
PDCL3	0	1	0	0
PDP1	0	1	0	0
PEX1	0	1	0	0
PGP	0	1	0	0
PHF10	0	1	0	0
PIR	0	1	0	0
PLAA	0	1	0	0
PNO1	0	1	0	0
POLD2	0	1	0	0
PPP6C	0	1	0	0
PPP6R2	0	1	0	0
PRPS1	0	1	0	0
PSME4	0	1	0	0
PTCD3	0	1	0	0
PTPN1	0	1	0	0
PXN	0	1	0	0
PYHIN1	0	1	0	0
RAB23	0	1	0	0
RAB3D	0	1	0	0
RAB6C	0	1	0	0
RBM4	0	1	0	0
RDX	0	1	0	0
RIPK1	0	1	0	0
RPRD1B	0	1	0	0
RTN4R	0	1	0	0
SACM1L	0	1	0	0
SEC24D	0	1	0	0
SEC61A2	0	1	0	0
SELENOW	0	1	0	0
SEPTIN5	0	1	0	0
SERPINA2	0	1	0	0
SH3GL1	0	1	0	0
SHC1	0	1	0	0
SLC1A2	0	1	0	0
SNAP25	0	1	0	0
SNRPC	0	1	0	0
SNTB1	0	1	0	0
SRSF9	0	1	0	0
SSRP1	0	1	0	0
STRBP	0	1	0	0
STRIP1	0	1	0	0
STX16	0	1	0	0
SYBU	0	1	0	0
TATDN1	0	1	0	0
TBXAS1	0	1	0	0
TFDP1	0	1	0	0
TJP3	0	1	0	0
TMC5	0	1	0	0
TMEM201	0	1	0	0
TMEM97	0	1	0	0
TMOD3	0	1	0	0
TOR1B	0	1	0	0
TOX2	0	1	0	0
TOX3	0	1	0	0
TOX4	0	1	0	0
TPM4	0	1	0	0
TREH	0	1	0	0
TRIM3	0	1	0	0
TRPV2	0	1	0	0
TSC2	0	1	0	0
TTC37	0	1	0	0
TUBB2A	0	1	0	0
TUBB2B	0	1	0	0
UBE3C	0	1	0	0
UBFD1	0	1	0	0
UBQLN4	0	1	0	0
VCPIP1	0	1	0	0
A2ML1	0	0	1	0
AASS	0	0	1	0
ABAT	0	0	1	0
ABHD17C	0	0	1	0
ABRACL	0	0	1	0
ACSL6	0	0	1	0
ACSM3	0	0	1	0
ADGRD1	0	0	1	0
ADGRL4	0	0	1	0
AGR2	0	0	1	0
ALDH1L2	0	0	1	0
ANGPTL2	0	0	1	0
ANKRD17	0	0	1	0
AP1G1	0	0	1	0
AP5B1	0	0	1	0
ARHGEF12	0	0	1	0
ARID1B	0	0	1	0
ARMC10	0	0	1	0
ASMTL	0	0	1	0
ASPN	0	0	1	0
ATP12A	0	0	1	0
ATP2B4	0	0	1	0
ATP2C1	0	0	1	0
ATP6V0D1	0	0	1	0
BAZ1A	0	0	1	0
BLOC1S1	0	0	1	0
BLOC1S2	0	0	1	0
C1orf50	0	0	1	0
CALML3	0	0	1	0
CARM1	0	0	1	0
CASC4	0	0	1	0
CASP5	0	0	1	0
CCDC124	0	0	1	0
CD34	0	0	1	0
CD36	0	0	1	0
CD63	0	0	1	0
CDK12	0	0	1	0
CDK13	0	0	1	0
CDK18	0	0	1	0
CETN2	0	0	1	0
CHMP4B	0	0	1	0
CIAO2B	0	0	1	0
COMMD8	0	0	1	0
COPS4	0	0	1	0
COQ9	0	0	1	0
COX4I1	0	0	1	0
CPD	0	0	1	0
CREG1	0	0	1	0
CRISP2	0	0	1	0
CSTF3	0	0	1	0
CTNNA2	0	0	1	0
CYGB	0	0	1	0
DCX	0	0	1	0
DCXR	0	0	1	0
DDX50	0	0	1	0
DGKZ	0	0	1	0
DLG2	0	0	1	0
DNTTIP1	0	0	1	0
DPEP1	0	0	1	0
DPH2	0	0	1	0
DUOX1	0	0	1	0
ECHDC1	0	0	1	0
EDC4	0	0	1	0
EIPR1	0	0	1	0
ELMO3	0	0	1	0
ELOB	0	0	1	0
EXD2	0	0	1	0
EXOG	0	0	1	0
FAM136A	0	0	1	0
FAM20A	0	0	1	0
FDPS	0	0	1	0
FERMT1	0	0	1	0
FIBP	0	0	1	0
FSTL3	0	0	1	0
FTO	0	0	1	0
FUOM	0	0	1	0
GADD45GIP1	0	0	1	0
GALNT5	0	0	1	0
GAPVD1	0	0	1	0
GCFC2	0	0	1	0
GFM2	0	0	1	0
GGTLC1	0	0	1	0
GIPC3	0	0	1	0
GMPR2	0	0	1	0
GNA12	0	0	1	0
GOLIM4	0	0	1	0
GOLPH3	0	0	1	0
GPRC5B	0	0	1	0
GRIA2	0	0	1	0
GRIPAP1	0	0	1	0
GRWD1	0	0	1	0
GTF2F1	0	0	1	0
GTF3C1	0	0	1	0
HACD2	0	0	1	0
HEATR5A	0	0	1	0
HEATR5B	0	0	1	0
HLA-DRB3	0	0	1	0
HOOK1	0	0	1	0
HS1BP3	0	0	1	0
HSBP1	0	0	1	0
HSPB6	0	0	1	0
IFIT5	0	0	1	0
IGHV1-18	0	0	1	0
IGHV1-69D	0	0	1	0
IGHV1-8	0	0	1	0
IGKV3D-7	0	0	1	0
IL18BP	0	0	1	0
IL4I1	0	0	1	0
INTS10	0	0	1	0
IRF2BP1	0	0	1	0
ITGAX	0	0	1	0
ITGB5	0	0	1	0
IVL	0	0	1	0
JAK1	0	0	1	0
KANK1	0	0	1	0
KBTBD11	0	0	1	0
KHDRBS2	0	0	1	0
KIAA0930	0	0	1	0
LARP4B	0	0	1	0
LIPF	0	0	1	0
LPGAT1	0	0	1	0
LSM3	0	0	1	0
LSM7	0	0	1	0
MANSC1	0	0	1	0
MARCO	0	0	1	0
MAT1A	0	0	1	0
MEP1A	0	0	1	0
MGAM	0	0	1	0
MGAM2	0	0	1	0
MGAT2	0	0	1	0
MGST1	0	0	1	0
MISP	0	0	1	0
MRC2	0	0	1	0
MRPL4	0	0	1	0
MRPS9	0	0	1	0
MST1R	0	0	1	0
MTA1	0	0	1	0
MTTP	0	0	1	0
MVB12A	0	0	1	0
NAGA	0	0	1	0
NBL1	0	0	1	0
NCSTN	0	0	1	0
NDUFA5	0	0	1	0
NECTIN2	0	0	1	0
NFATC2IP	0	0	1	0
NKIRAS2	0	0	1	0
NOC4L	0	0	1	0
NOP2	0	0	1	0
NOSIP	0	0	1	0
NOVA2	0	0	1	0
NPEPL1	0	0	1	0
NPRL3	0	0	1	0
NUDT16L1	0	0	1	0
OSBPL11	0	0	1	0
OTC	0	0	1	0
P2RY12	0	0	1	0
P4HA1	0	0	1	0
PABPC4	0	0	1	0
PAPOLA	0	0	1	0
PARP10	0	0	1	0
PCNP	0	0	1	0
PCYT1B	0	0	1	0
PDCD11	0	0	1	0
PDXP	0	0	1	0
PELO	0	0	1	0
PEX11B	0	0	1	0
PGM2L1	0	0	1	0
PIK3IP1	0	0	1	0
PLA2G15	0	0	1	0
PODXL2	0	0	1	0
POLR2D	0	0	1	0
PPIL3	0	0	1	0
PPWD1	0	0	1	0
PRKG1	0	0	1	0
PRX	0	0	1	0
PSAT1	0	0	1	0
PSMC6	0	0	1	0
PSMD4	0	0	1	0
PSMF1	0	0	1	0
PTDSS2	0	0	1	0
PTRHD1	0	0	1	0
PUDP	0	0	1	0
PUM1	0	0	1	0
RAB22A	0	0	1	0
RAP2B	0	0	1	0
RBM15	0	0	1	0
RFC5	0	0	1	0
RGCC	0	0	1	0
RGL2	0	0	1	0
RGPD5	0	0	1	0
RGPD8	0	0	1	0
RNF20	0	0	1	0
RNF214	0	0	1	0
ROBO2	0	0	1	0
RPL23A	0	0	1	0
RPL9	0	0	1	0
RRP1B	0	0	1	0
RTN4IP1	0	0	1	0
SAP18	0	0	1	0
SCLY	0	0	1	0
SDC1	0	0	1	0
SDSL	0	0	1	0
SEC11A	0	0	1	0
SELP	0	0	1	0
SEPHS1	0	0	1	0
SERPINI2	0	0	1	0
SIGLEC1	0	0	1	0
SLC27A1	0	0	1	0
SNW1	0	0	1	0
SON	0	0	1	0
SORD	0	0	1	0
SP140L	0	0	1	0
SPG7	0	0	1	0
SPINT1	0	0	1	0
SPTLC2	0	0	1	0
SQLE	0	0	1	0
ST13P4	0	0	1	0
ST14	0	0	1	0
ST6GALNAC1	0	0	1	0
SVEP1	0	0	1	0
TACSTD2	0	0	1	0
TANC1	0	0	1	0
TAOK2	0	0	1	0
TG	0	0	1	0
TGFB1I1	0	0	1	0
TGFBR3	0	0	1	0
TIA1	0	0	1	0
TJP1	0	0	1	0
TMED3	0	0	1	0
TMPRSS6	0	0	1	0
TNPO1	0	0	1	0
TOLLIP	0	0	1	0
TRAPPC11	0	0	1	0
TRIM26	0	0	1	0
TRMT112	0	0	1	0
TRMT5	0	0	1	0
TRNT1	0	0	1	0
TTC12	0	0	1	0
UBASH3B	0	0	1	0
UBE2Q1	0	0	1	0
UBE4A	0	0	1	0
UPF2	0	0	1	0
USF1	0	0	1	0
UTP14A	0	0	1	0
WDFY1	0	0	1	0
WDR55	0	0	1	0
WIPF1	0	0	1	0
YIF1A	0	0	1	0
YIPF3	0	0	1	0
ZC3H7B	0	0	1	0
ZFYVE1	0	0	1	0
ZNF385A	0	0	1	0
AARS2	0	0	0	1
AASDHPPT	0	0	0	1
ABCC4	0	0	0	1
ABR	0	0	0	1
ACADSB	0	0	0	1
ACIN1	0	0	0	1
ACP2	0	0	0	1
ACSL3	0	0	0	1
ACSM2B	0	0	0	1
ACSM5	0	0	0	1
ACYP1	0	0	0	1
ADH4	0	0	0	1
ADH7	0	0	0	1
ADNP	0	0	0	1
AGPAT3	0	0	0	1
AHSP	0	0	0	1
AIF1L	0	0	0	1
AIG1	0	0	0	1
AKR7A3	0	0	0	1
ANKRD44	0	0	0	1
ANKS1A	0	0	0	1
ANXA8	0	0	0	1
ANXA8L1	0	0	0	1
APPL1	0	0	0	1
AQP2	0	0	0	1
AQP9	0	0	0	1
ARHGAP1	0	0	0	1
ARHGAP9	0	0	0	1
ARHGEF10	0	0	0	1
ARHGEF17	0	0	0	1
ARHGEF6	0	0	0	1
ARMC6	0	0	0	1
ARMH3	0	0	0	1
ARSD	0	0	0	1
ASCC1	0	0	0	1
ASRGL1	0	0	0	1
ATF6B	0	0	0	1
ATP6V1G1	0	0	0	1
ATP8A1	0	0	0	1
ATPAF2	0	0	0	1
AUH	0	0	0	1
AVL9	0	0	0	1
BCL2L13	0	0	0	1
BDH1	0	0	0	1
BICD2	0	0	0	1
BICDL2	0	0	0	1
BLOC1S3	0	0	0	1
BMS1	0	0	0	1
BPTF	0	0	0	1
BRD4	0	0	0	1
BRD7	0	0	0	1
BSN	0	0	0	1
BTN3A3	0	0	0	1
C1orf52	0	0	0	1
C4orf33	0	0	0	1
C7orf50	0	0	0	1
CA9	0	0	0	1
CACYBP	0	0	0	1
CALB2	0	0	0	1
CAMK2B	0	0	0	1
CAMK2G	0	0	0	1
CAMK4	0	0	0	1
CAMKV	0	0	0	1
CASKIN2	0	0	0	1
CBL	0	0	0	1
CD209	0	0	0	1
CD46	0	0	0	1
CD48	0	0	0	1
CDK2AP1	0	0	0	1
CEBPZ	0	0	0	1
CENPV	0	0	0	1
CHAMP1	0	0	0	1
CHCHD2	0	0	0	1
CHCHD2P9	0	0	0	1
CHCHD4	0	0	0	1
CHD1	0	0	0	1
CHUK	0	0	0	1
CIAPIN1	0	0	0	1
CLCA4	0	0	0	1
CLDN3	0	0	0	1
CLEC4M	0	0	0	1
CMA1	0	0	0	1
CNPY4	0	0	0	1
CNTNAP1	0	0	0	1
COBLL1	0	0	0	1
COG8	0	0	0	1
COPS2	0	0	0	1
COPS7A	0	0	0	1
COQ10B	0	0	0	1
COQ7	0	0	0	1
CORO2B	0	0	0	1
COX1	0	0	0	1
CPSF7	0	0	0	1
CREBBP	0	0	0	1
CRNN	0	0	0	1
CRYBG1	0	0	0	1
CST1	0	0	0	1
CST4	0	0	0	1
CTAGE1	0	0	0	1
CWC15	0	0	0	1
CYLD	0	0	0	1
CYP20A1	0	0	0	1
DAB2	0	0	0	1
DAGLB	0	0	0	1
DAP3	0	0	0	1
DCP1A	0	0	0	1
DDB2	0	0	0	1
DDX20	0	0	0	1
DDX56	0	0	0	1
DEGS1	0	0	0	1
DEK	0	0	0	1
DHCR7	0	0	0	1
DHX57	0	0	0	1
DMGDH	0	0	0	1
DNAJB4	0	0	0	1
DNAJC19	0	0	0	1
DOCK4	0	0	0	1
DPM1	0	0	0	1
DPP8	0	0	0	1
ECSCR	0	0	0	1
EDC3	0	0	0	1
EFEMP2	0	0	0	1
EFNA1	0	0	0	1
EIF1	0	0	0	1
EIF1B	0	0	0	1
EIF2S2	0	0	0	1
EIF3K	0	0	0	1
ELFN1	0	0	0	1
ELOVL1	0	0	0	1
EMC8	0	0	0	1
EML3	0	0	0	1
ENTPD1	0	0	0	1
EP300	0	0	0	1
EPHB4	0	0	0	1
ERBIN	0	0	0	1
ERLIN1	0	0	0	1
ETV6	0	0	0	1
EXOC5	0	0	0	1
EXOSC10	0	0	0	1
FAM114A1	0	0	0	1
FAM120A	0	0	0	1
FAM120C	0	0	0	1
FAM83F	0	0	0	1
FASTKD2	0	0	0	1
FBLL1	0	0	0	1
FBXL2	0	0	0	1
FBXW9	0	0	0	1
FIP1L1	0	0	0	1
FKBP15	0	0	0	1
FLT1	0	0	0	1
FMNL1	0	0	0	1
FN3KRP	0	0	0	1
FRY	0	0	0	1
FUNDC1	0	0	0	1
GALNS	0	0	0	1
GBP3	0	0	0	1
GEMIN5	0	0	0	1
GLRX	0	0	0	1
GMEB2	0	0	0	1
GNA15	0	0	0	1
GNG12	0	0	0	1
GON7	0	0	0	1
GPD1	0	0	0	1
GPRC5A	0	0	0	1
GSKIP	0	0	0	1
GTF2E2	0	0	0	1
GTF3C2	0	0	0	1
HAX1	0	0	0	1
HCCS	0	0	0	1
HDDC2	0	0	0	1
HECTD4	0	0	0	1
HELLS	0	0	0	1
HM13	0	0	0	1
HMCN1	0	0	0	1
HMGA1	0	0	0	1
HS2ST1	0	0	0	1
HSPA14	0	0	0	1
HTRA1	0	0	0	1
IGHV3-64	0	0	0	1
IGKV1-16	0	0	0	1
IGKV1D-16	0	0	0	1
IGKV3-7	0	0	0	1
IGLV2-14	0	0	0	1
IGLV2-18	0	0	0	1
IKZF1	0	0	0	1
INO80E	0	0	0	1
INPP5F	0	0	0	1
IQSEC1	0	0	0	1
ITGA2	0	0	0	1
IYD	0	0	0	1
KAT7	0	0	0	1
KHNYN	0	0	0	1
KIF21A	0	0	0	1
KLHDC4	0	0	0	1
KMT2A	0	0	0	1
LCMT1	0	0	0	1
LGI4	0	0	0	1
LILRA4	0	0	0	1
LILRA6	0	0	0	1
LILRB2	0	0	0	1
LOXL1	0	0	0	1
LPCAT4	0	0	0	1
LPXN	0	0	0	1
LRATD2	0	0	0	1
LRCH4	0	0	0	1
LRP1B	0	0	0	1
LSG1	0	0	0	1
LSM1	0	0	0	1
LY75	0	0	0	1
M6PR	0	0	0	1
MAMDC2	0	0	0	1
MAN1A2	0	0	0	1
MAP2K7	0	0	0	1
MARK2	0	0	0	1
MARK3	0	0	0	1
MBLAC2	0	0	0	1
MECR	0	0	0	1
METTL17	0	0	0	1
METTL3	0	0	0	1
MMP1	0	0	0	1
MOB1A	0	0	0	1
MOB1B	0	0	0	1
MOCS3	0	0	0	1
MON2	0	0	0	1
MORF4L1	0	0	0	1
MPHOSPH8	0	0	0	1
MRPL2	0	0	0	1
MRPL39	0	0	0	1
MRPL49	0	0	0	1
MRPL55	0	0	0	1
MRPS10	0	0	0	1
MRPS26	0	0	0	1
MRPS35	0	0	0	1
MRPS36	0	0	0	1
MSRA	0	0	0	1
MTCH1	0	0	0	1
MTCH2	0	0	0	1
MTCL1	0	0	0	1
MTIF2	0	0	0	1
MUC4	0	0	0	1
MXRA8	0	0	0	1
MYL6	0	0	0	1
NAA11	0	0	0	1
NADK	0	0	0	1
NAT1	0	0	0	1
NCAPD2	0	0	0	1
ND1	0	0	0	1
NDC80	0	0	0	1
NDE1	0	0	0	1
NDRG2	0	0	0	1
NDUFA2	0	0	0	1
NDUFA7	0	0	0	1
NDUFB11	0	0	0	1
NDUFB9	0	0	0	1
NDUFS7	0	0	0	1
NECAP1	0	0	0	1
NELFCD	0	0	0	1
NFKB1	0	0	0	1
NMNAT1	0	0	0	1
NMT2	0	0	0	1
NOL7	0	0	0	1
NRBP1	0	0	0	1
NT5C3A	0	0	0	1
NT5DC2	0	0	0	1
NUB1	0	0	0	1
NUP54	0	0	0	1
NUP58	0	0	0	1
NUP88	0	0	0	1
NUTF2	0	0	0	1
OLFML1	0	0	0	1
OTULINL	0	0	0	1
PAIP1	0	0	0	1
PAK3	0	0	0	1
PAXX	0	0	0	1
PBDC1	0	0	0	1
PCDHGC3	0	0	0	1
PCF11	0	0	0	1
PDE8A	0	0	0	1
PDLIM4	0	0	0	1
PEA15	0	0	0	1
PEF1	0	0	0	1
PFDN2	0	0	0	1
PFKFB1	0	0	0	1
PFKFB3	0	0	0	1
PFKFB4	0	0	0	1
PHF6	0	0	0	1
PI4K2A	0	0	0	1
PIGU	0	0	0	1
PIK3AP1	0	0	0	1
PIK3C3	0	0	0	1
PIK3CB	0	0	0	1
PIK3R1	0	0	0	1
PIK3R2	0	0	0	1
PIP4K2B	0	0	0	1
PIPOX	0	0	0	1
PIPSL	0	0	0	1
PKHD1L1	0	0	0	1
PLD1	0	0	0	1
PLD4	0	0	0	1
PLEKHA6	0	0	0	1
PLXNA4	0	0	0	1
POFUT1	0	0	0	1
POLRMT	0	0	0	1
POM121	0	0	0	1
POM121C	0	0	0	1
PPCS	0	0	0	1
PPFIA4	0	0	0	1
PPFIBP2	0	0	0	1
PPP1R14A	0	0	0	1
PPP1R14B	0	0	0	1
PRPS2	0	0	0	1
PRUNE2	0	0	0	1
PRXL2B	0	0	0	1
PTBP2	0	0	0	1
PTK7	0	0	0	1
PTPRA	0	0	0	1
PTPRCAP	0	0	0	1
PTPRT	0	0	0	1
PYCR3	0	0	0	1
QKI	0	0	0	1
RAB29	0	0	0	1
RAB34	0	0	0	1
RBFOX1	0	0	0	1
RBFOX2	0	0	0	1
RBM22	0	0	0	1
RBM23	0	0	0	1
RBM6	0	0	0	1
RBMXL2	0	0	0	1
RBSN	0	0	0	1
RELN	0	0	0	1
RENBP	0	0	0	1
RFC4	0	0	0	1
RHOT1	0	0	0	1
RIPK2	0	0	0	1
RMDN1	0	0	0	1
RMI2	0	0	0	1
RNASE3	0	0	0	1
RNF123	0	0	0	1
RNF2	0	0	0	1
RNPS1	0	0	0	1
RPE	0	0	0	1
RPL18A	0	0	0	1
RPL7L1	0	0	0	1
RPS13	0	0	0	1
RPS26P11	0	0	0	1
RPTOR	0	0	0	1
RRM2	0	0	0	1
RXRA	0	0	0	1
RXRB	0	0	0	1
RXRG	0	0	0	1
S100A10	0	0	0	1
SARDH	0	0	0	1
SBNO1	0	0	0	1
SCYL3	0	0	0	1
SEC14L2	0	0	0	1
SEC14L3	0	0	0	1
SELENOM	0	0	0	1
SEPTIN6	0	0	0	1
SETD3	0	0	0	1
SH2B1	0	0	0	1
SLC15A1	0	0	0	1
SLC29A1	0	0	0	1
SLC37A4	0	0	0	1
SLC44A1	0	0	0	1
SLC5A2	0	0	0	1
SMARCAD1	0	0	0	1
SMARCD1	0	0	0	1
SMARCD2	0	0	0	1
SMPD4	0	0	0	1
SMYD3	0	0	0	1
SNRPA	0	0	0	1
SNRPB2	0	0	0	1
SNX3	0	0	0	1
SOGA1	0	0	0	1
SOGA3	0	0	0	1
SOWAHC	0	0	0	1
SPCS2	0	0	0	1
SPON2	0	0	0	1
SRBD1	0	0	0	1
SREK1	0	0	0	1
SRGAP2	0	0	0	1
SRGAP2B	0	0	0	1
SRGAP2C	0	0	0	1
SRM	0	0	0	1
SRR	0	0	0	1
SSU72	0	0	0	1
STAT2	0	0	0	1
STK25	0	0	0	1
SUGP2	0	0	0	1
SUPT3H	0	0	0	1
SYNJ1	0	0	0	1
SYNJ2BP	0	0	0	1
SYTL4	0	0	0	1
SZT2	0	0	0	1
TAF5L	0	0	0	1
TANGO2	0	0	0	1
TBC1D15	0	0	0	1
TBC1D4	0	0	0	1
TDP2	0	0	0	1
TDRD7	0	0	0	1
TFAM	0	0	0	1
TGFBRAP1	0	0	0	1
THBS3	0	0	0	1
THOC1	0	0	0	1
THOC7	0	0	0	1
THSD4	0	0	0	1
TLR3	0	0	0	1
TM9SF4	0	0	0	1
TMED4	0	0	0	1
TMEM222	0	0	0	1
TMLHE	0	0	0	1
TMOD1	0	0	0	1
TNNC2	0	0	0	1
TOMM22	0	0	0	1
TOR1A	0	0	0	1
TPPP	0	0	0	1
TRAF2	0	0	0	1
TRAPPC13	0	0	0	1
TRAPPC9	0	0	0	1
TRHDE	0	0	0	1
TRIM65	0	0	0	1
TRIM72	0	0	0	1
TRMT1L	0	0	0	1
TTC9C	0	0	0	1
TTI1	0	0	0	1
TUT1	0	0	0	1
TXNDC12	0	0	0	1
TXNL1	0	0	0	1
UBE2O	0	0	0	1
UBE4B	0	0	0	1
UBTF	0	0	0	1
UCHL5	0	0	0	1
UCK2	0	0	0	1
UFD1	0	0	0	1
USP12	0	0	0	1
USP46	0	0	0	1
VAMP3	0	0	0	1
VAMP7	0	0	0	1
VBP1	0	0	0	1
VRK1	0	0	0	1
WBP11	0	0	0	1
WDR91	0	0	0	1
WIPI2	0	0	0	1
XPO6	0	0	0	1
XRN1	0	0	0	1
YBX2	0	0	0	1
ZC3H15	0	0	0	1
ZC3H4	0	0	0	1
ZC3HAV1L	0	0	0	1
ZC3HC1	0	0	0	1
ZMIZ1	0	0	0	1
ZMYND8	0	0	0	1
ZNF512	0	0	0	1
ZNF638	0	0	0	1
ZRANB2	0	0	0	1
